# Supplementary material for: Comprehensive Analysis of a circRNA-miRNA-mRNA Network to Reveal Potential Inflammation-Related Targets for Gastric Adenocarcinoma
Source: Mediators Inflamm. 2020 Aug 1;2020:9435608. doi: 10.1155/2020/9435608 (PMC7416288; doi:10.1155/2020/9435608)
Supplement: Supplementary 1 — Table S1: circRNA expression profiling data. [file 9435608.f1.xls]

## Sheet: All Targets Value - CircRNAs
All Targets Value (Entities where at least 4 out of 12 samples have flags in Present or Marginal) # Column A: probeID, it represents the probe name. # Column B ~ M: Raw Intensity of each sample. # Column N ~ Y: log2 value of Normalized Intensity of each sample. # Column Z ~ AK: Flags, flags are attributes that denote the quality of the entities using methods from GeneSpring software. # Column AL …
	Raw Intensity												Normalized Intensity												Flags												Annotations
probeID	[1N](raw)	[2N](raw)	[3N](raw)	[4N](raw)	[5N](raw)	[6N](raw)	[1T](raw)	[2T](raw)	[3T](raw)	[4T](raw)	[5T](raw)	[6T](raw)	[1N](normalized)	[2N](normalized)	[3N](normalized)	[4N](normalized)	[5N](normalized)	[6N](normalized)	[1T](normalized)	[2T](normalized)	3T](normalized)	[4T](normalized)	[5T](normalized)	[6T](normalized)	1N:flag_call	2N:flag_call	3N:flag_call	4N:flag_call	5N:flag_call	6N:flag_call	1T:flag_call	2T:flag_call	3T:flag_call	4T:flag_call	5T:flag_call	6T:flag_call	circRNA	Alias	circRNA_type	chrom	strand	txStart	txEnd	best_transcript	GeneSymbol	Sequence
ASCRP000002	130.5	95.1667	170	107	129.167	119.333	755.667	309.667	243.667	278.167	284.833	396	7.3955	7.24184	7.86449	7.07351	7.45809	7.63472	8.17127	7.14459	8.3471	8.27872	8.09107	7.76589	P	P	P	P	M	P	P	P	P	P	P	P	hsa_circRNA_000010	hsa_circ_0000263	exonic	chr10	+	125120834	125121663	TCONS_00017720	XLOC_008652	TCCTTTTGGCCTCACCCAATGACCTGGCTGAAGAAGAGCCCAAGGA
ASCRP000004	104.833	103.167	91	111.5	71	91.8333	899.833	1352.5	114.5	135.333	173.667	360	6.97476	7.38717	6.85359	7.14058	6.3621	7.12001	8.58956	9.40094	6.92115	7.04279	7.1362	7.62349	P	P	P	P	P	P	P	M	P	P	P	P	hsa_circRNA_000031	hsa_circ_0000009	intronic	chr1	+	2225564	2225807	NM_003036	SKI	ATTGGCACTCAGTGACCATCAGGCTGGCTGTGTGCGGCAGCTTCCT
ASCRP000005	109	96.5	103.167	71.6667	66.5	72.1667	204	235.667	104	118.333	114.833	120.667	7.05146	7.2066	7.06007	6.39323	6.18354	6.67073	6.53618	6.75668	6.70565	6.7082	6.27434	5.93045	P	P	P	P	P	P	P	P	P	P	P	P	hsa_circRNA_000041	hsa_circ_0000035	antisense	chr1	+	27747415	27747744	NM_001201404	WASF2	GCAGGTTGAGGATTTTATTTGATCCCTGCTCTAATTTTTAGCTTCA
ASCRP000006	122.167	107.667	83.8333	165.667	100	80.3333	701.5	747	97.6667	112	132.5	174	7.27421	7.48105	6.74689	7.87522	6.98637	6.88867	8.20866	8.4632	6.5725	6.60893	6.59609	6.50022	P	P	P	P	P	P	P	P	P	P	P	P	hsa_circRNA_000042	hsa_circ_0000036	intronic	chr1	+	28199932	28200152	NM_001039477	THEMIS2	CTCGCAGTGGGGGAGATGGAGGTGGAGGAGAGAGATGCTGTGTGGG
ASCRP000007	222.667	224.333	181.5	379.333	226.5	153.333	2514.17	4366.17	176.167	259.167	458.5	817.167	8.3277	8.79904	7.96082	9.32044	8.40241	8.05498	10.3964	11.8757	7.76067	8.17368	8.91579	8.72174	P	P	P	P	P	P	P	P	P	P	P	P	hsa_circRNA_000046	hsa_circ_0000059	intronic	chr1	+	40506473	40506637	NM_001105530	CAP1	GTCTCTTGAGGTGAGGGTGTGCAGCTTGGTAGGGATTGGGGTCCCT
ASCRP000008	67.3333	66.6667	53.1667	80.6667	65.1667	56.1667	566.167	967.167	74.1667	84.6667	121.333	191.5	6.09602	6.49043	5.87704	6.55084	6.20112	6.01182	7.89911	8.85256	5.75721	5.94099	6.3739	6.65972	A	A	A	P	P	A	P	M	A	A	P	P	hsa_circRNA_000082	hsa_circ_0000189	intragenic	chr1	-	224462789	224463160	NM_001243146	NVL	AAATGAGTAGTATGTTGGTGAGAGTGAACGTGCTGTGCGACAAGTT
ASCRP000010	156.667	97.3333	820.667	151	176.167	136.667	2776.83	357.5	632.167	484.833	644.333	758.167	7.73998	7.29014	10.0637	7.68448	7.96603	7.88093	10.3522	7.36956	9.84536	9.24942	9.47643	8.61509	P	P	P	P	P	P	P	P	P	P	P	P	hsa_circRNA_000094	hsa_circ_0000247	exonic	chr10	+	74474868	74475660	ENST00000603649	MCU	ACATTCGCAGGTCTTTCACTACCATTCCTACAGTGATTGGCAAGAT
ASCRP000011	62.6667	56.6667	69.3333	60.3333	68.8333	63.1667	164.333	206.333	92.3333	113.5	125.5	158.333	5.97717	5.98404	6.40116	6.054	6.2487	6.40638	6.274	6.56071	6.43469	6.62787	6.44852	6.34796	A	A	A	P	P	A	A	P	P	P	P	P	hsa_circRNA_000095	hsa_circ_0000250	antisense	chr10	-	76388345	76388676	NM_001123	ADK	ATGCATAGTGCTTTGGTCTAGATTCCCTATCTTTAGCTATGACTGA
ASCRP000012	91.1667	108.667	72.6667	102.833	81.5	78.5	545	1064.33	102.167	122.333	150.667	245.667	6.67867	7.48748	6.55784	6.97906	6.57046	6.84447	7.8476	8.98404	6.70344	6.76382	6.85426	7.08114	P	M	P	P	P	P	P	A	P	M	P	P	hsa_circRNA_000104	hsa_circ_0000266	intronic	chr10	-	126336614	126337010	NM_014661	FAM53B	AAGAACCAAGAATGCAGAAGTCTGGGGGTGGTGGAGAGCCAGGCCA
ASCRP000016	96.1667	89.8333	85.3333	85.6667	69.3333	77.6667	597.667	860.333	94.5	120.5	140	242.667	6.80349	7.10778	6.75692	6.66817	6.30399	6.82089	7.97296	8.69135	6.55419	6.77668	6.72787	7.06637	P	P	P	P	P	P	P	P	P	P	M	P	hsa_circRNA_000162	hsa_circ_0000488	intronic	chr13	-	50680743	50681192	NR_002612	DLEU2	CCTAACACAGTTTTAGATGGAGTTTGGCTTGGTTTTCTTATTCCAT
ASCRP000017	2639.33	457.667	566.667	2697.5	1670	1268.33	5222.67	5874.33	1310.83	480.5	6189.5	26718.8	11.7803	9.94397	9.51275	12.0883	11.0838	10.8493	12.0436	12.5094	11.1615	9.24103	13.1309	12.8834	P	P	P	A	P	P	P	P	P	P	P	M	hsa_circRNA_000166	hsa_circ_0000512	intragenic	chr14	-	20811282	20811436	NR_002312	RPPH1	CGAAGTGAGTTCAATGGCTGAGGTGAGGTGAGTTCCCAGAGAACGG
ASCRP000018	549.167	112.833	150.667	670.667	341.667	238	471.167	700.667	607	214.167	927	3822	9.6755	7.60507	7.68762	10.2513	8.97419	8.74045	7.64505	8.36153	9.79426	7.86529	10.1396	10.4162	P	P	P	P	P	P	P	P	P	P	M	P	hsa_circRNA_000167	hsa_circ_0000518	intragenic	chr14	-	20811404	20811554	NR_002312	RPPH1	TCCGCGCGAGCTCATCAGTGGGGCCACGAGCTGAGTGCGTCCTGTC
ASCRP000019	175.167	102	108.5	138	126.5	109.5	1342.17	1645	135.5	213.5	289.667	555.667	7.93077	7.37967	7.18985	7.53795	7.41525	7.45798	9.27296	9.76098	7.32371	7.86708	8.1222	8.23188	P	P	M	A	P	P	P	P	P	P	P	P	hsa_circRNA_000178	hsa_circ_0000549	intronic	chr14	+	70236227	70236759	NM_001039465	SRSF5	ATAATAATAAAGCCTGTCTGTGTCGTTGGCCTTATGACGAGGAGTG
ASCRP000020	59.3333	53.6667	59.8333	63	61.3333	53.5	152.5	190.667	78	88.1667	102	145.333	5.88706	5.89949	6.14216	6.14065	6.00871	5.9328	6.19074	6.44703	5.95507	6.06636	5.97786	6.24141	A	A	A	P	A	A	P	P	A	P	P	P	hsa_circRNA_000191	hsa_circ_0000611	intronic	chr15	+	63798951	63799360	NM_001256702	USP3	ATACTGTGACTGGGGGTAGGATGACATCTTTGCATCTTGCAACAAA
ASCRP000022	87.5	93.3333	50.8333	125	94.5	66.3333	990.667	3004.33	93.3333	120.167	240	890	6.58724	7.14173	5.76394	7.3436	6.85842	6.53866	8.73474	10.9851	6.4339	6.75841	7.76347	8.84497	A	P	A	P	P	P	P	P	P	P	P	P	hsa_circRNA_000200	hsa_circ_0000670	intronic	chr16	+	9199043	9199243	NM_014117	C16orf72	GTGGTTAAGACAGTGTTGTGTTGAAGGGACTGTTTATAATTTTCAC
ASCRP000026	200.667	190	144.833	272.333	151	118.667	820	1705.17	128.833	199.5	254	388.667	8.13755	8.56943	7.63008	8.76085	7.72676	7.65216	8.46158	9.83623	7.20673	7.61624	7.89708	7.73637	P	P	P	P	P	P	P	P	P	M	P	P	hsa_circRNA_000250	hsa_circ_0000848	intronic	chr18	-	46470601	46470865	NM_001190821	SMAD7	ATGTGGGGGTGGAGGCTTAATTAACGTTTGTAAATCCCTCTTGAGA
ASCRP000027	6625	3621.33	4923.33	4285.67	3920.33	3993	10668.8	14466.3	2984.83	2305.17	4187.33	13087.7	12.9309	12.8358	12.8	12.7583	12.0393	12.2084	13.2464	13.7526	12.3168	12.0867	12.549	11.8363	P	P	P	P	P	M	P	P	P	P	P	P	hsa_circRNA_000274	hsa_circ_0000919	intronic	chr19	-	19760861	19761115	NM_020410	ATP13A1	GGGTAGGGAGGTGAGGGCCTGGTGTGGGGTTTCCCAAGGAGAGCGC
ASCRP000028	786.333	596.333	800.167	634.667	988	932.5	744.833	608.5	676.833	621.667	625.833	1363.5	10.2115	10.4073	10.0276	10.1521	10.4063	10.3985	8.29799	8.16746	9.96343	9.71423	9.44908	9.33653	P	P	P	P	P	P	P	P	P	P	P	P	hsa_circRNA_000280	hsa_circ_0000929	exonic	chr19	+	36510135	36510286	ENST00000586962	AC002116.7	GGGCAGCAAGGTTCGTCCAGCTCCACGCCCACCCACTGGCCGCTGG
ASCRP000031	359.333	243.333	338	289.5	312.167	227.5	962	893	338.833	442.5	463.167	587.333	9.08768	8.94449	8.8937	8.84445	8.85001	8.68276	8.69302	8.7509	8.80469	9.11596	8.9013	8.29826	P	A	P	P	P	P	P	P	P	P	P	P	hsa_circRNA_000300	hsa_circ_0000988	intronic	chr2	-	31215302	31215470	NM_001253826	GALNT14	CCTGGGGCAGGGGTGGCCTCTTTCACTTTAACCTGCTCCTCACCTT
ASCRP000039	53.6667	46.8333	48	61.3333	52.1667	46	135.167	179	69.1667	72.5	86.5	108	5.71953	5.62075	5.73995	6.12688	5.746	5.62059	6.02396	6.36337	5.48815	5.54134	5.58265	5.75325	A	A	A	P	A	A	P	P	A	A	A	P	hsa_circRNA_000368	hsa_circ_0001301	intronic	chr3	-	49372452	49373029	ENST00000464168	USP4	ATAACTAGTGTGAGGAGAGGTTGAAGGTATCTTATTGACAGCCGGT
ASCRP000043	2179.17	1427.17	2423.5	1386.17	1628.83	1485.83	4907.33	4516.17	1644	2171.33	2085.5	3904.17	11.5111	11.6398	11.8702	11.203	11.0229	11.072	11.9034	11.9611	11.5343	12.0002	11.3669	10.4431	P	P	P	P	P	P	P	P	P	P	P	P	hsa_circRNA_000410	hsa_circ_0001500	intronic	chr5	-	77299605	77299759	NM_001271769	AP3B1	TTTAGTTCCGTGTAATCAGTAGGTTCCTGTCCTCTTCCTTCATGAC
ASCRP000044	145.167	135.5	110.833	155.5	106.5	97.6667	471.667	867	111	145	158.833	229.833	7.59345	7.95468	7.23621	7.76783	7.143	7.28131	7.65048	8.7051	6.87651	7.16653	6.95302	6.97044	A	P	A	P	P	P	P	P	P	P	P	P	hsa_circRNA_000422	hsa_circ_0001545	intragenic	chr5	+	149778518	149778894	NM_000356	TCOF1	GCTTTAGGGGGTGGGGGCAGCAGTGGGTGGGGAAAAGCTGCAGGTC
ASCRP000045	67	65.1667	55.5	64	60.1667	65.1667	258.667	144.333	72.8333	77.6667	103.333	91.5	6.11349	6.3621	5.98521	6.14465	6.01206	6.43551	6.8543	6.09262	5.66736	5.65475	6.01926	5.49805	A	A	A	P	A	P	P	P	A	A	A	A	hsa_circRNA_000424	hsa_circ_0001549	antisense	chr5	-	159664587	159664757	NM_001040442	FABP6	TGTAGGGGAGAGCATACCTGTAGAATTGGGCAGTAAGGCCGTGGAA
ASCRP000048	92.5	80.5	80.6667	71	83.5	70.6667	214.5	271.667	103	131.833	135.667	239	6.73787	6.87052	6.66974	6.33811	6.67951	6.61628	6.60494	6.96719	6.74236	6.9826	6.64187	7.02299	P	P	P	P	P	P	P	P	A	P	P	P	hsa_circRNA_000442	hsa_circ_0001625	intronic	chr6	-	90836894	90837550	NM_001170794	BACH2	TGTATGGGCTGGAAAAGAGGTCCCGTGACTTCTCAGAGAGGACGCT
ASCRP000049	95.6667	84	75.6667	79	89.3333	82.3333	126	119.167	94.8333	99.8333	111.833	114.667	6.74275	6.90545	6.5627	6.50764	6.83138	6.895	5.96376	5.8311	6.52414	6.37845	6.21654	5.83199	M	M	P	M	P	P	P	P	A	P	P	M	hsa_circRNA_000446	hsa_circ_0001664	intragenic	chr6	-	159238977	159239240	NM_001111077	EZR	TTCTCACACGCAGAAGACGATAGGAATAGGAGGAGGCAGGGCGGGC
ASCRP000050	66.1667	77.1667	72	71.6667	61.8333	58.6667	140.5	132.833	77.6667	85.6667	94.6667	98.6667	6.12982	6.76687	6.45964	6.35713	6.04713	6.19188	6.06954	5.96409	5.82732	5.95361	5.76341	5.61301	P	P	A	P	A	A	M	P	A	P	A	A	hsa_circRNA_000454	hsa_circ_0001703	intronic	chr7	-	45802132	45802362	NR_024271	SEPT7P2	GAGTGGAGAGGCATGAGATTAAGGAGCACATAAGAGGAATATTAGC
ASCRP000051	269.833	214	349.333	215.333	304.167	228.667	587.333	368.833	283.333	331.167	374.333	404.5	8.61633	8.7247	8.93518	8.40428	8.82855	8.68949	7.93864	7.40128	8.56405	8.59776	8.57098	7.79163	P	P	P	P	P	M	P	P	P	P	P	P	hsa_circRNA_000455	hsa_circ_0001707	intronic	chr7	+	48541721	48542148	NM_152701	ABCA13	GCCTTCAACTTCCAGCCCTATTACTGAATGAGAAAATGTATTATGA
ASCRP000053	88.6667	75	80.5	78.3333	77.5	71	339.167	263	109.167	140.167	138.333	183	6.64464	6.6837	6.65661	6.49071	6.49111	6.59271	7.17049	6.90819	6.85087	7.0771	6.68063	6.57206	P	M	P	P	P	P	P	P	P	P	P	P	hsa_circRNA_000466	hsa_circ_0001745	antisense	chr7	+	130782554	130782733	NR_015431	LINC-PINT	TTTTCAAAGAGAAAGAGGTGGTCCCAGCATCTTGTTAAGCAGACTG
ASCRP000054	5616.17	3773.33	4659.83	6268.67	8457.67	6667.67	6835.83	6114.83	5666	4136.5	5597.5	22313	12.7386	12.8258	12.7071	13.3115	13.0109	12.7856	12.576	12.5695	13.352	12.966	12.9091	12.5502	P	P	P	P	P	P	P	P	P	P	P	P	hsa_circRNA_000481	hsa_circ_0001828	intronic	chr8	+	142139086	142139265	NM_014957	DENND3	TCTTGGGCAGGTGCCCTGGAGCAGCGCCCTGCTCCCCTCCCCTCTT
ASCRP000055	96.6667	53.1667	58.3333	128.333	99.6667	61.6667	180.167	232.167	87	90	192.833	594.167	6.80436	5.89717	6.08853	7.42485	6.97955	6.31459	6.38352	6.7176	6.25587	6.09558	7.33104	8.30611	P	A	A	P	P	A	P	P	P	P	P	P	hsa_circRNA_000482	hsa_circ_0001829	exonic	chr8	-	142264087	142264728	NM_001286646	SLC45A4	AATACTGTTGCAGATTGATCATCCAGTCACTCGATGGGGATTACCA
ASCRP000056	93	88	109.833	82.8333	96.6667	99.6667	247	225.833	103.333	115.667	150.167	215	6.75556	7.05452	7.2155	6.61934	6.9227	7.30481	6.79235	6.69679	6.69756	6.66485	6.85729	6.86723	P	P	P	P	P	P	P	P	P	P	P	P	hsa_circRNA_000486	hsa_circ_0001853	antisense	chr9	+	35657751	35658017	NR_003051	RMRP	CACGAACCACCCGCGCTGAGAATGAGCCCCGTGTGGTTGGTGCGCG
ASCRP000057	61.6667	55.6667	52.5	53.6667	57.1667	62.8333	109	115.333	98.3333	88.5	92.5	107	5.94197	6.12065	5.90754	5.89347	5.90882	6.40416	5.81171	5.79957	6.55857	6.09717	5.78391	5.7557	A	A	A	A	A	P	P	A	P	P	A	P	hsa_circRNA_000487	hsa_circ_0001854	antisense	chr9	+	35657767	35658017	NR_003051	RMRP	CACGAACCACCCCCGTGTGGTTGGTGCGCGGACACGCACTGCCTGC
ASCRP000058	82	66	94.6667	81.3333	81.5	78	310	315.167	115.667	156	178.5	205.333	6.54946	6.51124	6.95189	6.57878	6.61418	6.82079	7.07733	7.17222	6.96012	7.29512	7.17941	6.79207	P	A	P	P	P	P	P	P	A	M	P	P	hsa_circRNA_000508	hsa_circ_0001942	intronic	chrX	-	129208318	129208555	NM_001127197	ELF4	AGTTAGGTAAGGAGGGGTCTGTTCCCTTCCTGGGCAGAGAAGGTGT
ASCRP000061	102.667	104.333	99	101.167	74.6667	79	299.833	519.667	82.3333	102.667	120.667	224.333	6.9283	7.40429	6.99548	6.95838	6.44586	6.81262	7.02778	7.95864	6.03891	6.39119	6.37837	6.91994	P	P	P	P	P	P	P	P	P	P	P	P	hsa_circRNA_000526	hsa_circ_0000248	intronic	chr10	+	75998951	76002791	NM_001123	ADK	CGGAGTGCAGGCTTGGTAGTTCTGAGAATTTTAGATTCAGTTATAA
ASCRP000062	169.833	136	82.1667	290.667	186.833	168	1505.67	1207.67	170.167	216.167	519.333	1444.5	7.86541	7.93012	6.67413	8.86416	8.0754	8.19867	9.46978	9.19311	7.69681	7.88197	9.10722	9.41724	P	P	P	P	P	P	P	P	P	P	P	A	hsa_circRNA_000543	hsa_circ_0000326	intragenic	chr11	+	65272490	65272586	NR_002819	MALAT1	CTGGAGTAACTGGCATGTGAACAAGCTTTTTCTGTATTTACATACA
ASCRP000063	109.333	87.8333	96	88.8333	90.3333	85.3333	215.5	181.5	131.167	119.667	115.667	166.833	7.06417	7.07263	6.97108	6.72244	6.81451	7.01859	6.60035	6.38589	7.20349	6.76238	6.27211	6.43363	P	P	M	P	P	P	P	P	M	P	P	P	hsa_circRNA_000552	hsa_circ_0000434	intronic	chr12	+	105501660	105501770	NM_015275	KIAA1033	AGCCCTTGGGGGCTGCGGGTGGACGCTCCTTCGGCCCGCCGCTGTT
ASCRP000064	248.833	137.5	740.333	157	297.167	278.333	416.167	345.5	413.167	400.833	445	294.167	8.51866	7.96142	9.87754	7.75711	8.79319	8.97053	7.46897	7.3187	9.14322	8.95697	8.84477	7.36021	P	P	P	P	P	P	P	P	P	P	M	P	hsa_circRNA_000554	hsa_circ_0000376	intronic	chr12	-	11199618	11248400	uc001qzf.2	PRB4	ACTCCATCTATCCATATGAGAGTTGGATTCTCACTCTGTTGTCCAC
ASCRP000065	60	51.1667	44.5	52.8333	61.6667	47.6667	117.5	122.167	74.1667	76	97.3333	174	5.95314	5.84035	5.53955	5.8513	6.09205	5.64241	5.90007	5.86843	5.70349	5.62108	5.91041	6.51638	A	A	A	P	A	A	P	P	A	A	A	P	hsa_circRNA_000556	hsa_circ_0000442	intragenic	chr12	-	116668237	116675510	NM_015335	MED13L	TTGGTATCACAGTGCACCTGAAAAGCTGAACTCACGGGAATCAAAT
ASCRP000067	91.3333	69	74.5	94.1667	71.3333	69	200.167	252.833	70	81.5	89.1667	106	6.68698	6.55656	6.55866	6.82991	6.35224	6.5697	6.50088	6.80905	5.58881	5.88674	5.69322	5.74881	P	A	P	P	P	P	P	P	A	A	A	A	hsa_circRNA_000571	hsa_circ_0000040	intronic	chr1	+	29241511	29241652	NM_001166005	EPB41	GTTTCAGACGGGGAAGGGGTTGCGTCGCGGGAGTGTTGGAAAGTTA
ASCRP000069	135.5	115.5	122	141.5	107	93	398.833	352.333	110	117.833	136.833	195.667	7.46918	7.63405	7.37846	7.56033	7.12491	7.1991	7.38446	7.33566	6.8648	6.70309	6.62777	6.70381	P	P	P	P	P	P	P	M	P	P	P	P	hsa_circRNA_000578	hsa_circ_0000487	intronic	chr13	-	50655754	50656296	NR_002612	DLEU2	AGACGGGGCTGAGGGGGGAGGGTTGGAGTTTGCGCATGCGTAAAAA
ASCRP000071	3427.5	596	833	4796.67	3103.83	1785.17	2221	3507	2484.17	966.833	7914.33	11484.2	12.1231	10.4093	10.0967	12.8829	11.7112	11.2807	10.2468	11.3625	11.9587	10.5746	13.5601	11.6448	P	P	P	M	M	P	P	P	P	P	P	P	hsa_circRNA_000585	hsa_circ_0000515	intragenic	chr14	-	20811305	20811534	NR_002312	RPPH1	AACAGACTCACGGCCAGCGAACTGAGTGCGTCCTGTCACTCCACTC
ASCRP000073	85.1667	71	73	76.8333	67.3333	61	313.5	640.167	81.5	96.3333	124.167	156.833	6.54929	6.65342	6.44636	6.44247	6.19979	6.23319	7.0841	8.23075	6.06057	6.23121	6.47031	6.32591	P	P	A	P	P	A	P	M	A	P	M	P	hsa_circRNA_000593	hsa_circ_0000550	antisense	chr14	+	70245970	70246161	NM_003049	SLC10A1	AGAAATTGGAGGTGGCAATCAAGAGTGGTGTCATGGCAAACATGAT
ASCRP000074	81.6667	82	75	80.6667	79.3333	73.6667	587.333	324.333	94.1667	97.3333	107.833	125.333	6.49514	6.92114	6.51915	6.55151	6.57658	6.72108	7.94702	7.21991	6.54485	6.29994	6.14269	6.00971	P	P	A	P	P	P	P	P	M	P	P	P	hsa_circRNA_000596	hsa_circ_0000661	antisense	chr15	+	100645330	100645426	NM_139057	ADAMTS17	CCGGGAGATGGTGCTGTTGCCACCCACCAGGATGGTGGCTCTTTTG
ASCRP000075	2299.83	1587.33	2493.83	2229.17	3605.33	3079	2914.67	2439.83	3060.5	2356.67	2781.17	10350.3	11.5896	11.8111	11.913	11.8285	11.9125	11.8945	10.6163	10.5398	12.3564	12.1188	11.9425	11.5105	P	P	P	A	P	P	P	P	P	P	P	M	hsa_circRNA_000598	hsa_circ_0000589	antisense	chr15	-	31645077	31645307	NM_015995	KLF13	CACCCTGGAGCCCAGCCCCCTGGCCCAGGGTCCCTTCCCTGTCACT
ASCRP000077	70.5	58.5	62.3333	56.1667	58.6667	61	175.833	221.833	83.6667	94.5	104.333	139.5	6.22383	6.13714	6.22231	5.99286	5.97499	6.25274	6.35208	6.65808	6.15331	6.24775	6.05082	6.14714	P	A	A	P	A	A	P	P	A	P	A	P	hsa_circRNA_000617	hsa_circ_0000668	intronic	chr16	+	6481519	6481649	NM_001142333	RBFOX1	TGAGGTCTTGGCAGGTGTCAGAGAAATCTACAAGCAGATAAAACAG
ASCRP000078	130.5	115.833	97.5	176.833	105	87.5	395	506.833	94	100.667	126.667	249.167	7.35611	7.6231	6.95465	8.01053	7.07152	7.03836	7.37655	7.89449	6.46651	6.37315	6.45744	7.11862	P	P	P	P	P	P	P	P	P	P	P	P	hsa_circRNA_000618	hsa_circ_0000708	intronic	chr16	+	67569550	67569679	NM_001193522	FAM65A	TGGTTGTGGTTTAGGAGGGGGGCATTCCAAAGGCAGGTGAATAAAT
ASCRP000080	58.3333	53.1667	50	51.1667	52.1667	54.8333	118.833	115.167	83.6667	85.6667	93.1667	119.667	5.89292	5.89715	5.78969	5.80061	5.72243	6.06274	5.23242	5.79388	6.19342	5.96954	5.78593	5.94839	A	A	A	A	A	A	M	P	A	P	A	P	hsa_circRNA_000620	hsa_circ_0000726	intragenic	chr16	-	89484691	89492069	NM_001256182	ANKRD11	ACTGACTTTCAGCTATGGAATCGCCCGAAAAAATCGAAATAACCGG
ASCRP000081	74.6667	54.3333	78.3333	70.3333	72.8333	65.8333	207.333	243.667	97.6667	128.667	144.833	196	6.32789	5.95947	6.61567	6.35	6.43046	6.50971	6.55664	6.80086	6.59509	6.92279	6.76381	6.71803	P	A	P	P	P	A	P	P	P	P	P	P	hsa_circRNA_000621	hsa_circ_0000664	exonic	chr16	-	960930	1004666	NR_033646	LMF1	CAGGATCATGCTTGGAGCATCGTGGCATTCCTGGTGGCTTTCCATC
ASCRP000082	68.3333	60.6667	65.3333	61.3333	67	60.3333	151.667	166.333	84.8333	98.3333	101.833	116.833	6.18065	6.24323	6.34784	6.07911	6.23957	6.30154	6.16502	6.27186	6.17005	6.33634	5.97956	5.90577	A	A	A	P	P	A	P	P	P	P	P	P	hsa_circRNA_000623	hsa_circ_0000748	intronic	chr17	+	27283886	27284084	ENST00000577182	PIPOX	ATGGGTGGGGGGCCACTCCAGCATTTGTCTTGGTGATGCCAGGTCA
ASCRP000083	624.667	336.5	347.333	338.333	612.833	574.833	447.833	451.833	248.5	260	300.333	657.833	9.79835	9.48538	8.91784	9.11221	9.78704	9.81867	7.56647	7.7354	8.35762	8.18587	8.16713	8.42656	P	P	P	A	P	P	P	P	P	P	P	P	hsa_circRNA_000624	hsa_circ_0000751	intronic	chr17	-	27620262	27620746	NM_020772	NUFIP2	CCCCGTCTCGATGGGGGTGGGGCTGGATCCGAAAAGCGCGGACGGG
ASCRP000084	82.1667	77.8333	82.8333	82.8333	66.1667	61.1667	215	211.667	78	96.3333	101.167	122.167	6.524	6.7648	6.71698	6.57549	6.1711	6.23219	6.62052	6.59735	5.91974	6.26141	5.94905	5.92597	P	A	P	P	P	A	P	P	A	P	A	P	hsa_circRNA_000626	hsa_circ_0000755	intronic	chr17	-	29151053	29151137	NM_015986	CRLF3	TGAGGGAGAGGTGGGACAGTGACCTGGGAGAGCTGAAAGTGGAGAC
ASCRP000085	25968.7	16832.3	38453.7	18951.7	31612.3	25549	48430.8	51726.3	23881	28322.2	40131	85806.2	14.7068	14.6345	15.5984	14.7229	14.7411	14.6969	15.4307	15.5254	15.3351	15.7521	15.5836	14.8322	A	P	P	P	P	P	M	A	A	P	M	A	hsa_circRNA_000629	hsa_circ_0000775	intronic	chr17	-	43012303	43012398	NM_001264573	KIF18B	AGGCCTCTTCCTTTCTTCCTTTCTCAGATACATCCCGGCCTCAGCT
ASCRP000086	276.333	232.5	384.667	221.333	318.333	431	686	926	323.5	373.667	510.667	1180.83	8.69893	8.85643	9.08473	8.43195	8.88048	9.47075	8.17211	8.80239	8.74403	8.83175	9.0859	9.16532	P	A	P	P	A	P	P	P	P	A	P	P	hsa_circRNA_000638	hsa_circ_0000822	antisense	chr18	+	3797731	3797939	NM_001003809	DLGAP1	CCCCATACTGTTCTTGTCATTGTGAATAAGACTCAGTGTATCATAA
ASCRP000087	156	153	157	140.667	159	119	429.833	428.5	104.833	119	159	209	7.63969	8.1626	7.73822	7.49797	7.80312	7.60142	7.49706	7.63348	6.76125	6.70834	6.95137	6.79795	P	P	P	P	P	P	P	P	P	A	P	P	hsa_circRNA_000639	hsa_circ_0000844	intronic	chr18	+	42269709	42269921	NM_001130110	SETBP1	GAGCAGGTGGGTATGGAGCAGCAGGGAAGATCATCCATTTGGGAAT
ASCRP000088	127	103	104	184.5	117.333	92.3333	715.167	1171.33	118	169	188.833	309	7.35396	7.40137	7.12481	8.08103	7.27863	7.14662	8.23764	9.14134	7.03461	7.48466	7.28679	7.40208	P	P	P	P	P	P	P	P	M	P	P	P	hsa_circRNA_000644	hsa_circ_0000861	antisense	chr18	-	77592249	77592394	TCONS_00026384	XLOC_012735	GGTCTCACGGGTGAGGATGGGCAGGTGAGTGCAGGTGAGGATGGAC
ASCRP000089	492.167	307	549.667	429.333	507.667	453.333	1292	1384.67	596	812	772.833	1512	9.53529	9.36239	9.48093	9.50336	9.5469	9.52147	9.21242	9.44614	9.75442	10.2438	9.73484	9.48122	P	P	P	P	P	P	P	P	P	P	P	P	hsa_circRNA_000645	hsa_circ_0000862	intronic	chr18	-	77693968	77695767	NM_001146343	PQLC1	AAGTCAAGGTTGCCCCCAGGCGGTCCTTCCTGGCCATCTATCTGCT
ASCRP000090	73.3333	57.6667	65.6667	70.6667	63.3333	56.3333	122.833	125.5	83.3333	93.5	107	132.5	6.30549	6.06005	6.30095	6.31552	6.12514	5.98328	5.91203	5.87699	6.18897	6.22703	6.11874	6.07786	P	A	A	P	A	A	M	P	A	P	P	P	hsa_circRNA_000651	hsa_circ_0000950	antisense	chr19	+	50373934	50374070	NM_001098632	AKT1S1	GCAGCAGCAGGATGGGACCCGGAGACCCAGATCAGGAACTGGACCT
ASCRP000091	228.667	158.833	234.667	180.667	213.833	179.333	450.333	334.667	256.667	280.667	288.667	389.667	8.37666	8.25401	8.35444	8.04409	8.29262	8.29237	7.57679	7.25853	8.41798	8.30706	8.11705	7.74377	P	P	P	P	P	P	P	P	P	P	M	P	hsa_circRNA_000653	hsa_circ_0000956	antisense	chr19	+	54821289	54821382	NM_181985	LILRA5	GACCCCGCAGGTCTGGCGTGGACTCCAGCCTCATCACCGTCAGATC
ASCRP000093	76.5	58.1667	63.8333	53.3333	65.5	56.5	166.5	198.333	84.8333	90.8333	108.5	217.333	6.42254	6.16368	6.28626	5.88226	6.16253	6.16064	6.29688	6.50384	6.25655	6.18976	6.12052	6.88722	P	A	A	A	P	A	P	P	P	P	M	P	hsa_circRNA_000662	hsa_circ_0001171	antisense	chr20	-	55844499	55844644	ENST00000412321	RP4-813D12.3	GTCTCTTTAGGTCTTGGATATGAAGAGCATGTTGTCTCTTCCTCTT
ASCRP000094	206.667	154	317.333	182	219.667	184.5	767.333	800.167	282.667	384.667	419	601	8.16948	8.19227	8.78585	8.05759	8.34546	8.33843	8.34979	8.57428	8.55362	8.88762	8.73653	8.31996	M	M	P	P	P	P	A	M	P	P	M	P	hsa_circRNA_000671	hsa_circ_0001221	intronic	chr22	-	30941049	30941149	NM_001193336	SEC14L6	GTCCTTGGAGGTCCTTAGGGTCTTTCCTTCGTGGTCGCACACGGCA
ASCRP000096	1316.67	780.333	2324	692	1748.33	1418.33	1725.33	1274.67	946.667	883	1216.33	4711.5	10.8828	10.7705	11.8049	10.248	11.1155	11.03	9.71514	9.28164	10.498	10.3565	10.6487	10.6412	P	M	M	A	P	P	P	P	P	P	P	P	hsa_circRNA_000676	hsa_circ_0001234	intragenic	chr22	+	41620952	41622347	NM_031488	L3MBTL2	GGCCCCAGAACTGTCCCATTCCTTTAAGGTACGAGCAGTCTACACA
ASCRP000097	267	123.333	169	168.5	151.667	123.667	430.833	451.333	180	265.5	224.5	344	8.64103	7.74693	7.82254	7.90381	7.70957	7.69441	7.51829	7.73057	7.78931	8.20165	7.64863	7.55834	P	P	P	P	P	P	P	P	P	P	P	P	hsa_circRNA_000679	hsa_circ_0001248	intronic	chr22	+	46676108	46676244	ENST00000381031	TTC38	AGAGGGGCAGGAGCAGGCAGGCGGCAGGCACAGGCACAGCCACAGA
ASCRP000098	372.167	206.667	945.167	289.833	481.667	325.833	4369.17	4944.17	835.5	2225	1898.17	2416	9.1402	8.67636	10.3467	8.86346	9.47944	9.15337	11.6571	12.157	10.3441	12.02	11.2506	9.95395	P	P	P	P	P	P	P	P	P	A	P	P	hsa_circRNA_000684	hsa_circ_0001013	intragenic	chr2	+	61339656	61345251	NM_001129993	KIAA1841	AAGGAAGCAAAAGAAAGTCTTGTTCTGTCATCCAGGCTGGAGTGTA
ASCRP000104	158.333	101.833	185.667	134.333	138.333	115.667	821.667	808.833	181.667	233.167	288.667	497.333	7.75544	7.38898	7.97264	7.47739	7.56291	7.55899	8.4599	8.59509	7.79166	8.0107	8.10915	8.07278	P	P	M	P	A	A	P	P	M	P	A	P	hsa_circRNA_000711	hsa_circ_0001443	intronic	chr4	-	140920348	140920479	NM_018717	MAML3	TCTATTTTCCTGAGGTTGCTGCTGCTGTCAAAGGCCCATTCAATTT
ASCRP000105	138.167	94.6667	121.5	111.167	83.6667	95.6667	253.833	233.5	118.333	140.167	150.5	166.167	7.49399	7.21394	7.34773	7.12602	6.67002	7.19275	6.82631	6.7499	7.01169	7.11296	6.84396	6.41932	P	P	P	P	P	P	P	P	P	P	P	A	hsa_circRNA_000721	hsa_circ_0001465	antisense	chr5	+	1487925	1488006	NM_024830	LPCAT1	CTAGACCCAGCGCAAAAAGAACAGTGGACTCTGCTGCCTGCTCACT
ASCRP000110	172.833	124.667	269	137.667	171.5	154	394.833	419.5	196.333	258.667	275.5	412.333	7.91083	7.79816	8.57274	7.53984	7.93644	8.03459	7.37349	7.60095	7.95376	8.18068	8.01796	7.81579	P	P	P	P	P	P	P	P	P	P	P	P	hsa_circRNA_000750	hsa_circ_0001749	intragenic	chr7	+	132990021	133002144	NM_001037126	EXOC4	AGCTCAAGTGTCACCATTCATATCCCGTTTCTTCTATCAAACTGAA
ASCRP000111	284.167	207	308.667	180.667	275.667	332.333	621.833	402	307.167	310	346.5	699	8.7624	8.68752	8.75307	8.02505	8.69956	9.17052	8.02688	7.54222	8.67794	8.47034	8.42163	8.50431	P	P	P	P	P	A	P	P	P	P	P	P	hsa_circRNA_000754	hsa_circ_0001669	intragenic	chr7	-	1543324	1543723	NM_001080453	INTS1	CGGGACCCCGGCCCAAGCCCCGTGCGGCAAGGGAGCGAATGAGCGA
ASCRP000113	6052.5	3986.5	5198.33	5654.33	8764.83	6122.5	10292.2	5434	6297.5	4325.33	6660.17	24383.7	12.8203	12.9048	12.8625	13.164	13.0567	12.6772	13.2085	12.3649	13.5288	13.1358	13.302	12.7112	P	P	P	P	P	P	P	P	P	P	P	P	hsa_circRNA_000764	hsa_circ_0001834	intronic	chr9	+	2017333	2017502	NM_003070	SMARCA2	ACAAGGCGAGCTCCCGCGGCTCCAGCCTCCGCGCCCTCCCGGCCGG
ASCRP000115	68.5	65	69.6667	61	67	62.6667	131	143.333	97.1667	109.5	119	131.667	6.19482	6.43225	6.42613	6.15769	6.19252	6.43084	6.0088	6.07046	6.58286	6.53896	6.36814	6.06906	P	A	A	M	P	A	P	P	P	P	P	P	hsa_circRNA_000776	hsa_circ_0001929	intragenic	chrX	+	73072005	73072154	TCONS_00017433	XLOC_008015	TAAAAAAGAATTAAAAGGCAGATATCCGTCACCCCGATGGGCCAGA
ASCRP000116	220.667	185.5	155	358.833	215	162.833	3030.67	3879	183.667	314	437	708.667	8.29692	8.52923	7.73175	9.22657	8.3061	8.12918	10.7165	11.5885	7.83996	8.48433	8.81235	8.51812	P	P	P	P	P	P	P	P	P	P	P	P	hsa_circRNA_000780	hsa_circ_0000217	intronic	chr10	-	14643337	14643566	NM_001282695	FAM107B	CTTAGGAAACCTGCTGTGGAGTGGGATGTCCTCTGTGTGCATCATG
ASCRP000121	44497.8	31190.7	30675.7	31497.7	49000.7	42807.8	56169.3	60381.2	17450.5	15124	33241.2	122728	15.552	15.4655	15.3067	15.4827	15.3846	15.5231	15.6508	15.7121	14.835	15.0031	15.3661	15.4158	M	M	M	P	A	P	M	A	M	M	P	M	hsa_circRNA_000791	hsa_circ_0000282	intronic	chr11	+	28250417	28255132	NM_001113528	METTL15	TCTTCCTTATGCTGGTTCCTCCCTCTTTGAACTCATCTGGATCTGG
ASCRP000122	435.833	359.833	416.167	392	431.833	317.667	1337.5	1730.5	504.5	603.333	634.667	1791.83	9.38115	9.58968	9.2064	9.38654	9.33172	9.13098	9.26801	9.86461	9.46881	9.61862	9.46186	9.68295	P	P	P	P	P	P	P	P	P	P	M	P	hsa_circRNA_000792	hsa_circ_0000291	intronic	chr11	+	35163017	35163328	NM_000610	CD44	TGCTTGTAAAAAGAGGGCCCTGGTGGTTTCCCTATAGTCTCTAGGG
ASCRP000124	130	134.833	124.333	130.333	111.167	102.5	269.667	130.667	122.667	117.333	205	182.833	7.37564	7.94053	7.37253	7.43661	7.15264	7.39081	6.89256	5.94541	7.08079	6.68591	7.46341	6.60065	P	P	P	P	P	P	P	P	P	P	P	P	hsa_circRNA_000799	hsa_circ_0000325	intragenic	chr11	+	65266845	65267149	NR_002819	MALAT1	GAAGACAGAACCCCGAATTAATACCAATAGAAGGGCAATGCTTTTA
ASCRP000129	54	47.8333	59.1667	47.6667	53.6667	48.6667	136.667	146.333	72.3333	85.6667	96.8333	112	5.75408	5.60613	6.06913	5.73899	5.80322	5.5894	6.05374	6.0917	5.6386	5.98445	5.86172	5.80638	A	A	A	A	A	A	P	P	A	P	A	P	hsa_circRNA_000815	hsa_circ_0000382	antisense	chr12	-	25348845	25348942	NM_001001660	LYRM5	TAGTTTTCCTGTCTCATAATGCTAAAACAGGGTGTAGGTATGCCCT
ASCRP000132	52.6667	46.6667	44	55.8333	54.3333	47.5	91.5	106.5	72	77.6667	99.1667	133	5.62027	5.502	5.52342	5.92568	5.83951	5.63448	5.61361	5.67307	5.69135	5.68352	5.90342	6.07757	A	A	A	P	A	A	P	P	A	A	A	P	hsa_circRNA_000820	hsa_circ_0000397	exonic	chr12	-	46622935	46648719	NM_001278387	SLC38A1	CAAACACTGGAATCCTACTTTTTCTAGTCAAGGAAACTTTTGAGCT
ASCRP000137	92.3333	76.5	99.5	72.3333	85	69.8333	187	206	109	143.667	142.5	167.333	6.72537	6.79564	7.01949	6.36688	6.66905	6.61069	6.42133	6.55545	6.81065	7.14434	6.73528	6.45407	P	P	P	P	P	P	P	P	P	P	P	P	hsa_circRNA_000855	hsa_circ_0000632	intragenic	chr15	-	74927307	74929309	NM_001142443	EDC3	ACATTTCAGGTGCCCATATACTCTACACCTTGCCGCTGGGTGTGTG
ASCRP000140	380.167	415	174	723.833	380.333	242.333	5960.33	12518.7	268.333	382.333	783	2406.67	9.16392	9.80623	7.89883	10.3799	9.116	8.76163	12.3178	13.5594	8.48912	8.87412	9.75571	9.95139	P	P	M	P	P	P	P	P	P	P	P	P	hsa_circRNA_000864	hsa_circ_0000662	intronic	chr16	-	398402	398484	NM_003502	AXIN1	CAGCAGTGTGGACTGTTGGCTGGTAAAGTGTGTGCAATGTGAGGAA
ASCRP000142	104	90.5	88.8333	103.333	99.5	83.6667	173.667	238	129	123.667	136.833	188.167	6.97302	7.13494	6.82759	6.99266	6.98438	6.9858	6.33385	6.76698	7.1907	6.76763	6.62248	6.6056	P	P	P	P	P	P	P	P	P	P	P	P	hsa_circRNA_000868	hsa_circ_0000723	antisense	chr16	+	87395105	87395209	NM_001282683	FBXO31	TCACAATACAGGAACGTCGATACGATGCGGTCAGGACCCTCCCTGT
ASCRP000143	1732.17	1130	1891.83	1628.5	2549	2280.67	1793.33	2226	1969.33	1717.17	1752.33	9209	11.2854	11.2733	11.513	11.4334	11.5472	11.5508	9.79907	10.369	11.7103	11.6413	11.183	11.3756	P	P	P	P	P	P	P	P	P	P	P	P	hsa_circRNA_000872	hsa_circ_0000747	antisense	chr17	+	27209637	27210251	NM_004475	FLOT2	ATGATCTTCACCTGGGCTGCCACCTCCCGCACCAGCTTGGCAAACT
ASCRP000144	1410.33	1433.5	716.333	2691	1637.33	1056.5	16558.2	22618.3	963.167	1570	2621	4758.67	11.0065	11.6426	9.8326	12.0844	11.0246	10.5971	14.1286	14.5899	10.6104	11.4666	11.8574	10.664	P	P	P	A	P	P	P	M	P	M	P	P	hsa_circRNA_000881	hsa_circ_0000788	intronic	chr17	+	55372279	55372525	NM_138962	MSI2	ATGATGGATGGGCCTAGTTTGCCTTTGAGTGTGTGTCTGTTTGGGG
ASCRP000147	112.5	113	143.333	129.5	114.167	101.667	292.167	497.5	109.333	115.833	136.5	186	7.09418	7.59205	7.59694	7.40091	7.23198	7.31959	7.00997	7.68723	6.79507	6.65516	6.64377	6.61636	P	P	P	P	P	P	P	P	P	P	P	P	hsa_circRNA_000896	hsa_circ_0000867	intronic	chr19	+	2270025	2270130	NM_004152	OAZ1	CTGGTCGAGGGTCGGATTTGGGCGCAGGACGGGGAGTCGGGGGAGG
ASCRP000148	68.5	62.8333	67.6667	60	63	63	164	152	79.3333	95.1667	100.833	111.667	6.15022	6.29823	6.3922	6.04382	6.09369	6.27828	6.25137	6.1355	6.02587	6.20033	5.94329	5.79741	A	A	A	P	A	A	P	M	A	M	A	P	hsa_circRNA_000903	hsa_circ_0001160	intronic	chr20	+	42641806	42641893	NM_001098796	TOX2	ACTCTGGGAGGTCCTTGATATACCTTGGAGTGGGGACTTGATCCTG
ASCRP000150	1373.67	1464.33	716.5	3070.5	1727.67	992.667	16677.5	25126.3	1059.67	1669.17	2888.5	5799.33	10.9333	11.6894	9.83568	12.282	11.1366	10.4931	14.1379	14.7553	10.7411	11.5958	11.9987	10.8693	P	P	P	M	P	P	P	P	P	P	P	P	hsa_circRNA_000911	hsa_circ_0001184	intronic	chr21	+	34797903	34797990	NM_005534	IFNGR2	AAACATCACTATGGCTGGTGAACGTGTGTGCTGGTGTCCCTGGGCA
ASCRP000151	94	81.6667	97	109.833	83	81.5	260	285	93.6667	122.833	142.667	147.833	6.73527	6.87281	6.9466	7.10346	6.64341	6.89115	6.8593	7.01841	6.47177	6.77821	6.72718	6.25325	P	P	P	P	P	P	A	P	A	P	P	P	hsa_circRNA_000921	hsa_circ_0001120	intronic	chr2	+	241991885	241992093	NM_001080437	SNED1	TGCCAGGCAGGTGAGAGGGTCAGGGGGATCAAGCAGGGTACATGGG
ASCRP000153	108	97.6667	71.8333	133.333	91.5	77	420.167	943.333	92.3333	117.167	177.333	372.667	7.02437	7.29789	6.49952	7.46499	6.80438	6.77229	7.47157	8.81663	6.48275	6.70379	7.18511	7.66568	P	P	P	P	P	M	P	P	P	A	P	P	hsa_circRNA_000926	hsa_circ_0001022	intragenic	chr2	+	65473318	65492309	NM_001005386	ACTR2	GGGTGATGTGGAAAAACTTTCTGCCTTATTTTTTGAACAATTGAGC
ASCRP000155	77	75	71.8333	80	73.3333	85	163.167	161	90.6667	98.8333	99	110.667	6.43371	6.74725	6.51	6.5737	6.38407	6.96578	6.25352	6.22592	6.42753	6.34776	5.92878	5.79969	P	P	A	P	P	P	P	P	P	P	A	P	hsa_circRNA_000931	hsa_circ_0001045	intronic	chr2	-	95756566	95756769	NM_031902	MRPS5	TAAATGAGTCTGGGGGGAGACCCCCCAAGATTTAGAGGCCAGCAAG
ASCRP000156	69.1667	67	61.6667	64.5	68.8333	63.1667	480.333	158.167	457.167	236.833	249.833	308.5	6.16973	6.4717	6.24672	6.19095	6.28363	6.34858	7.63464	6.20222	9.33197	8.0297	7.84994	7.41319	A	A	A	P	P	A	P	P	P	M	P	P	hsa_circRNA_000936	hsa_circ_0001373	intragenic	chr3	-	185655590	185655721	NM_001243879	TRA2B	TGCGGTAGGGGCCTCCTTAAGGAAGGTGCAAGAGGTTGGCAGCTTC
ASCRP000157	77.6667	64.3333	213.167	63.6667	72.3333	67.1667	184.5	172.333	111.667	104.5	127.667	118.667	6.38854	6.38173	8.21356	6.17657	6.39809	6.51727	6.41175	6.31867	6.88524	6.42769	6.53139	5.89551	P	A	P	P	P	A	P	P	A	A	A	P	hsa_circRNA_000941	hsa_circ_0001293	intragenic	chr3	-	47700047	47718272	NM_003074	SMARCC1	GATGAATTTTGAAACATTTGGGTCCATGCCTTTTTAGAGCAGTGGG
ASCRP000158	145.167	142	141.5	195.667	123.667	97.8333	962.5	1527.83	121	165.667	220.167	339.833	7.58279	8.03774	7.60706	8.21252	7.3923	7.27287	8.69406	9.61435	7.03975	7.43521	7.59997	7.54858	P	P	P	P	P	P	P	P	P	P	P	P	hsa_circRNA_000942	hsa_circ_0001303	antisense	chr3	+	49849197	49849279	NM_003335	UBA7	ATGACAGAGGCTGGGGTGTTGGGAGATCAGACTTGGATTTGTGAAT
ASCRP000159	91.6667	66.5	132.333	115.667	103.333	75.1667	181.5	181.167	121.5	148.667	168.333	186.333	6.72268	6.44049	7.45756	7.22129	7.07488	6.73447	6.39023	6.39277	7.07523	7.22464	7.07904	6.61907	P	A	P	P	P	P	P	A	A	P	P	P	hsa_circRNA_000943	hsa_circ_0001306	intragenic	chr3	+	51575513	51586079	NM_015106	RAD54L2	AGCCTAGGATACATTTCTATTCCCCAGGAAGCCATCACACTCCTTC
ASCRP000160	113	96.1667	115.5	99.8333	111.833	102.667	200	220.167	134.667	158.333	162.167	304.333	7.10377	7.22134	7.26395	6.89223	7.22623	7.32082	6.50597	6.65889	7.30772	7.32842	7.0023	7.39744	P	P	P	P	M	M	P	P	P	P	P	P	hsa_circRNA_000945	hsa_circ_0001435	intronic	chr4	-	107129512	107129694	NM_001163435	TBCK	AAACTAATTAGGGAAGGGTAGTCTTCCCACCACCTAAAAGTGGGTA
ASCRP000161	144.833	133.167	115.333	147.167	125.833	138.667	610.667	307.167	113	139.333	142.5	135.833	7.61303	7.90494	7.25335	7.64937	7.38178	7.88373	8.00626	7.12929	6.90805	7.0648	6.72445	6.07529	M	P	P	P	P	P	P	P	P	P	P	P	hsa_circRNA_000950	hsa_circ_0001525	intronic	chr5	+	131761180	131761386	NR_045116	C5orf56	TGCTTAACATGGGAGATGTCCACACACAGTCATACCTGTGTTTGAA
ASCRP000162	45055.3	36291.7	39522.7	41912	58028	44968.7	58310.7	64227.3	40270.5	29320.2	43826.7	119542	15.5728	15.6617	15.6398	15.7293	15.6086	15.6007	15.7521	15.8262	15.7674	15.9041	15.7349	15.3488	P	M	M	M	M	M	P	A	P	P	M	P	hsa_circRNA_000956	hsa_circ_0001489	antisense	chr5	+	59770958	59771235	NM_001165899	PDE4D	AGAAGAGCCAGGTCTTCTCCCCCCTAATGTTATGCTCCCTAAGCAC
ASCRP000166	62.8333	56.8333	61	56.1667	60.3333	58.5	160.667	149	97.5	99.5	112	135.167	5.98888	6.10389	6.21039	5.95828	5.97148	6.13607	6.23626	6.116	6.61387	6.39004	6.24836	6.12219	A	A	A	P	A	A	P	M	A	P	M	P	hsa_circRNA_000962	hsa_circ_0001576	intronic	chr6	-	11278195	11278439	NM_001142393	NEDD9	TGGAAAAGAACGCAATTCAAGGCTACTGTGGTTCCCAGAGGCTGGC
ASCRP000167	215.333	227	167.167	309.667	147.667	158.333	1474.83	2268.33	222.667	247	338.333	1233.5	8.25906	8.8234	7.83129	8.95944	7.6708	8.09045	9.43311	10.4017	8.16119	8.09879	8.3777	9.20954	P	P	P	P	P	P	P	P	A	A	P	P	hsa_circRNA_000963	hsa_circ_0001644	intronic	chr6	-	136610762	136610850	NM_001077440	BCLAF1	TGGGTGGTGTCGGGTAGGCCTCGCAATGTATTCAAGTTACTCCAGG
ASCRP000170	6348.33	4192.83	5222	7027.67	10365.7	6894.17	7310	7028	6172.17	4271	5972.33	24789	12.8753	12.9346	12.9051	13.4367	13.2986	12.8423	12.6908	12.7621	13.4939	13.0736	13.0412	12.7434	P	P	P	P	M	M	P	P	P	P	P	M	hsa_circRNA_000987	hsa_circ_0001827	intronic	chr8	+	142139086	142139206	NM_014957	DENND3	GAATCTGGGGGTGCCCTGGAGCAGCGCCCTGCTCCCCTCCCCTCTT
ASCRP000172	212	260.5	120	623.667	325.833	172.667	3337.67	6028	169.667	245.667	444	587.833	8.24675	9.0687	7.36342	10.1158	8.90471	8.22592	10.9788	12.5587	7.68529	8.08183	8.84891	8.29755	P	P	P	P	P	P	P	P	P	P	P	P	hsa_circRNA_000993	hsa_circ_0001887	intragenic	chr9	-	125930467	125936121	NM_001171137	STRBP	TGTTAATTCTGGGATCAAGGTGGTCGGACATTGTGTGGTGTAATGA
ASCRP000173	541.333	339.667	496.5	419.667	849.5	466.833	906	1028.83	421.333	523	635.167	4746	9.66277	9.51324	9.36756	9.47345	10.1889	9.57719	8.60048	8.94345	9.18128	9.39737	9.47009	10.6318	P	P	P	P	P	P	P	P	P	P	P	P	hsa_circRNA_000996	hsa_circ_0001901	intronic	chr9	-	138773785	138774005	NM_015447	CAMSAP1	GGGGAGGCAGGTCTCCTGTCTGCCTTCCCACAACCACGACCTGGGA
ASCRP000174	123.5	135.5	75.6667	110.167	89.3333	66.3333	1305.5	1393.83	109.333	124	180	185	7.28823	7.92914	6.58383	7.12707	6.76107	6.47769	9.22823	9.45479	6.83618	6.82325	7.20297	6.60048	P	P	P	P	A	P	A	M	P	P	P	A	hsa_circRNA_000997	hsa_circ_0001845	antisense	chr9	+	33469584	33469973	NM_022917	NOL6	TCCAGGATTTGTAGGTAGTCAGGTGGTGAGCCAAGTGGGCCAGGTA
ASCRP000175	360.667	255.667	334.333	309.167	363.667	273.5	1076.33	1292.17	456.5	581.5	695.5	1424.67	9.08957	9.02769	8.87142	8.95485	9.04364	8.9393	8.85594	9.31022	9.32335	9.53978	9.5974	9.39584	M	M	P	A	M	M	A	M	P	M	A	M	hsa_circRNA_001012	hsa_circ_0000254	intronic	chr10	-	99144016	99144540	NM_001145114	RRP12	GGCTGCCAAGATTGGGGGTCCTCAGGGTCTCCATCCTGGCTGCCGA
ASCRP000177	93.1667	86	66.1667	118.5	76.3333	68.8333	272.333	433.833	87.1667	88.3333	112	175.333	6.73042	6.99764	6.31209	7.24039	6.48202	6.57173	6.91624	7.6472	6.28334	6.05178	6.12953	6.51103	P	P	A	A	M	P	P	P	P	P	M	P	hsa_circRNA_001026	hsa_circ_0000141	intronic	chr1	-	156220621	156220731	ENST00000368267	SMG5	TGGGGGGATGGTGAGGAGGATCCGAGTGGCATGGTGACCATCATCA
ASCRP000178	111.667	95.1667	107.667	101.167	94	80.6667	408.667	577.833	102.833	125.333	156.167	198.833	7.05384	7.1779	7.13855	6.90822	6.83414	6.8257	7.4301	8.09265	6.69742	6.84752	6.87684	6.68585	M	M	M	M	M	M	P	P	P	P	M	M	hsa_circRNA_001030	hsa_circ_0000333	intronic	chr11	+	68229037	68229117	NM_001164160	PPP6R3	AATTATAGGTGAACGGGATGGGTCTTTGGATGTGTTTCCTGTTGAG
ASCRP000180	8824.17	5968.5	7996.67	8328	11901	10943	5837.33	7044.67	8998	6136.33	6444.83	25113.5	13.311	13.3	13.4508	13.6673	13.4968	13.624	12.2603	12.7728	13.9546	13.8712	13.2073	12.7667	P	A	P	M	P	P	P	P	P	P	P	P	hsa_circRNA_001038	hsa_circ_0000453	antisense	chr12	-	122495211	122495481	NM_001024808	BCL7A	CACCCACCAGGCCTGGACACCCCCTGAAGCCACCTCTCCGCCCGCA
ASCRP000181	61.5	53.8333	51.5	58.5	58.3333	53.5	193.667	240.5	73	86.8333	95.3333	160.333	5.95683	5.88457	5.83938	6.02234	5.98128	5.87923	6.48298	6.78072	5.68815	6.03796	5.82345	6.35846	A	A	A	A	A	A	P	P	A	P	A	P	hsa_circRNA_001039	hsa_circ_0000454	intronic	chr12	+	122592216	122592446	NM_014938	MLXIP	TTCTGAGTTGGCCTTGATTGGAAGGCCAGGTGTCTGTCCAAGGCTG
ASCRP000182	231.167	140.667	110	202.333	172.833	142.333	811.5	1701.67	123.833	118.5	194.333	649	8.39991	7.99984	7.1877	8.27441	7.94016	7.9254	8.43502	9.82059	7.12062	6.69707	7.35508	8.41576	P	P	P	P	P	P	P	P	P	P	P	P	hsa_circRNA_001040	hsa_circ_0000379	intronic	chr12	+	14685190	14685289	ENST00000544122	RP11-502N13.2	AGAGCTGCAGGGGCCCGTTTGTGTTGTGGAGCAAGGTTCTCAAAAG
ASCRP000184	490.5	324.667	682.5	365.833	544.667	489.667	2907.33	1702.5	797.667	997.167	1069	4127	9.53269	9.43977	9.75574	9.25958	9.64815	9.63182	10.5344	9.82862	10.2523	10.6249	10.3915	10.4964	P	P	P	P	P	P	A	P	P	P	P	P	hsa_circRNA_001046	hsa_circ_0000395	intragenic	chr12	-	46622935	46624417	NM_001077484	SLC38A1	TGGAATCCTACTTTTTCTCCTGGCTGAATTGTTCCCATCTCAAGTC
ASCRP000185	154.5	97.3333	161.833	112.333	129.333	111.167	384.333	385.667	160.333	210.333	216.667	287.333	7.72848	7.286	7.76568	7.18014	7.47062	7.49702	7.34843	7.48492	7.59615	7.84103	7.56248	7.32057	P	A	P	P	P	P	P	P	P	P	A	P	hsa_circRNA_001049	hsa_circ_0000037	intragenic	chr1	+	28282081	28282196	NM_001009568	SMPDL3B	CCTTGTAGGTATACATTTGGGCCTGTCTACCTGCCTTTGGGGCAAT
ASCRP000189	1638.5	1261.5	1285.33	1553.17	1677.5	1224.67	7849.33	3651.67	2985.83	2487.83	3482	18751.7	11.1961	11.4212	10.9412	11.3385	11.0826	10.8027	12.8111	11.4492	12.3003	12.2236	12.3509	12.3166	P	P	P	P	P	P	P	P	P	P	M	M	hsa_circRNA_001059	hsa_circ_0000554	intragenic	chr14	+	74551677	74551959	NM_001024674	LIN52	ATTCTGGGTAAAAGGACAGGGGGATGGCGTCTCCCACAGACGGTAA
ASCRP000192	48773	35495.7	36421.7	36693.7	59447.8	50586	43539	42868.5	36443.5	24022.8	41810	131518	15.7293	15.6283	15.4985	15.5843	15.6508	15.6874	15.3239	15.2897	15.6587	15.5436	15.6462	15.5614	M	M	M	P	M	M	M	M	M	P	M	M	hsa_circRNA_001067	hsa_circ_0000644	intronic	chr15	-	81195758	81195954	ENST00000558261	RP11-351M8.1	TCTCCACTTTCTCCCCGTTTACCAGTCTAAGGGGTTGACACAGTGA
ASCRP000194	156.5	110.333	125	126.5	147	116.333	237.333	207.833	128.333	156.167	151.667	233.333	7.75396	7.54768	7.39857	7.36076	7.65207	7.55339	6.74112	6.57531	7.1613	7.29119	6.86008	6.98628	P	P	P	P	P	P	P	P	M	M	P	M	hsa_circRNA_001073	hsa_circ_0000687	intragenic	chr16	+	29756705	29756841	uc002dtq.1	BC041466	AGACCCCAGGGTGCCTCAGACAAGAAAGGGTAAGCGTGAGCCAGGT
ASCRP000195	85.3333	75.5	73.6667	83.8333	69.1667	66.8333	449.167	451.167	96	124.167	135.5	181.833	6.60224	6.69289	6.53105	6.6498	6.30575	6.53045	7.56842	7.71741	6.52209	6.84586	6.60891	6.56446	P	P	P	P	P	P	P	P	P	P	M	P	hsa_circRNA_001082	hsa_circ_0000792	intragenic	chr17	-	56409123	56409324	ENST00000579003	MIR142	AGGCTGAAGGGCTGGGACTGAGGCTCTGGGGGAGTCAGGACCTTGA
ASCRP000197	91.3333	96.1667	99.6667	92.6667	92.8333	82.5	283.333	175	99.5	114.167	124.833	138.333	6.68232	7.22188	7.03584	6.8045	6.83972	6.89949	6.9635	6.34031	6.6082	6.65007	6.46569	6.15259	P	P	P	P	P	P	P	P	P	P	P	P	hsa_circRNA_001085	hsa_circ_0000800	intronic	chr17	+	66516303	66516423	NM_001276289	PRKAR1A	ACAGGGAAGAAGCCAAACCACACAGGCAACCATGGTATGGCATGTC
ASCRP000199	530.333	467.833	994.833	568.167	751	844	1209.33	977	1029.67	1064.17	839.667	828.167	9.63282	9.97625	10.4526	9.94624	10.0503	10.2888	9.09142	8.87463	10.6941	10.7376	9.89994	8.73969	P	A	P	P	P	P	A	P	P	P	P	P	hsa_circRNA_001096	hsa_circ_0000866	antisense	chr19	-	1439001	1439241	NM_001018	RPS15	CGCGGAGACCATGCCCACCACCACCCTGCCTGGAAAGGACCCAGCG
ASCRP000201	3988.17	2301.5	3751.5	2376.5	4939.83	3469.5	6275	4633.17	3011	2877	3397	22600	12.326	12.2271	12.4486	11.8978	12.2251	12.0495	12.422	12.0361	12.3225	12.4673	12.2923	12.5711	P	P	P	P	P	P	P	M	P	P	P	M	hsa_circRNA_001100	hsa_circ_0000877	intragenic	chr19	+	4445536	4447603	NR_039901	MIR4746	TTGATCTTCCGGTACTTCTCCTCCTCGGGGTGCAGGATGGAGTCCG
ASCRP000204	6608	4691.33	4935	4300	9307.17	7709.67	2879.67	2531.5	3655	2922.83	4913.5	23044.5	12.9098	13.0613	12.7857	12.7328	13.1516	13.1083	10.6135	10.5916	12.7202	12.4619	12.7327	12.6079	P	P	P	P	P	P	P	P	M	P	P	M	hsa_circRNA_001108	hsa_circ_0001132	antisense	chr20	-	8352261	8352391	NM_015192	PLCB1	GCCCCTCTGTCCAAGAGCCCACATATTTGTTCATTTACTTTTTAAT
ASCRP000205	597.333	405.667	572.5	507.833	976.333	1153.5	982.667	735.833	672.833	812.167	999.167	3788.5	9.79776	9.7795	9.52282	9.75991	10.3949	10.7174	8.72661	8.42808	9.95614	10.233	10.2673	10.4025	P	P	P	P	M	P	P	P	P	P	P	P	hsa_circRNA_001109	hsa_circ_0001056	intragenic	chr2	-	100721965	100754399	NM_001025108	AFF3	CCCCTTCCCGCTGGGAGTGGAGTATGAAGACCAAGGAATTCTCTTA
ASCRP000206	63.3333	57.3333	60.6667	84.3333	68.5	56.1667	109	105.5	81.6667	84.3333	116.333	116.167	5.99314	6.09359	6.14532	6.69093	6.30619	6.00848	5.82515	5.69286	6.0592	5.99659	6.29536	5.87528	A	A	A	P	P	A	P	P	A	A	P	P	hsa_circRNA_001123	hsa_circ_0001014	intragenic	chr2	+	61340904	61345251	NM_001129993	KIAA1841	GGACCGAGTCAAGTCAAAGGAAGCAAAAGAAGACCTGATATTGAAT
ASCRP000208	90.6667	88.5	99	88.5	78.8333	78.8333	190.667	233	95	121	129.667	149.5	6.68577	7.03052	7.00982	6.74334	6.55242	6.83557	6.45495	6.73109	6.49227	6.74795	6.52639	6.2653	P	P	P	P	P	P	P	P	P	P	M	P	hsa_circRNA_001131	hsa_circ_0001049	intronic	chr2	-	98276327	98276412	NM_005735	ACTR1B	GGGGGCACAGGTGGAGGCAGCATGTCAGTGCAAACAGGGGACTGGT
ASCRP000210	63.6667	53.5	47.6667	72.3333	58.6667	49.6667	410.167	849.833	72	82.6667	113	212.5	6.02935	5.83979	5.71649	6.35793	5.94991	5.91289	7.43307	8.6689	5.64296	5.89821	6.22707	6.85551	A	A	A	P	A	A	P	P	A	A	P	P	hsa_circRNA_001143	hsa_circ_0001288	intronic	chr3	-	47079055	47079155	NM_014159	SETD2	TGAAAAATAAGTGAGTGTGGCTTACACATGTATTTCCTGATCATTT
ASCRP000212	414.333	303.667	704.333	348.333	469.5	429.333	1114.83	786.167	492.333	624.667	599.333	516	9.32302	9.32761	9.81199	9.17905	9.4429	9.45551	8.94651	8.54341	9.43394	9.71519	9.36928	8.14094	A	P	P	P	P	P	P	P	P	P	P	P	hsa_circRNA_001153	hsa_circ_0001455	antisense	chr4	+	164514761	164515093	NM_001166373	MARCH1	GGTTTTATAAGCTCATCCTCAACCATGACTTCCTTCCAATTTTGTC
ASCRP000215	51.8333	59.8333	47.3333	47	51.6667	47.3333	109	111.667	83	86.8333	97.8333	108.5	5.63625	6.13766	5.63095	5.61123	5.72958	5.66322	5.8219	5.76098	6.17696	6.0612	5.84034	5.78678	A	A	A	A	A	A	M	P	A	P	A	P	hsa_circRNA_001170	hsa_circ_0001482	antisense	chr5	-	49963938	49964083	NM_001178055	PARP8	CGCCAACGTAGGTAAAGAAAAGCCACAATAATCAAACAAACAAGCA
ASCRP000217	5194.83	1863.83	2625	2646	8916.33	6851.5	2285.17	1066.67	1300.33	750.667	2557.67	48971	12.6185	11.9852	12.0091	12.0659	13.0803	12.8272	10.2113	8.9874	11.1422	10.0735	11.7942	13.7276	A	P	P	A	M	M	P	P	P	P	P	M	hsa_circRNA_001175	hsa_circ_0001658	exonic	chr6	+	157357968	157406039	uc003qqq.1	ARID1B	TCTCTCCTGCAAGTATCCCAGGTTGAAGTCTTGGCCTCGGAGGATG
ASCRP000223	65.5	62.3333	62.5	64.6667	68.3333	60.6667	109	142	87	93.3333	103.833	108	6.08896	6.31109	6.28072	6.20236	6.26134	6.31509	5.81454	6.07472	6.23173	6.21789	6.05856	5.78825	A	A	A	P	P	A	P	P	P	P	P	P	hsa_circRNA_001196	hsa_circ_0001780	intronic	chr8	+	17796781	17799020	ENST00000518930	PCM1	TAAAAGACTAAATATACTGCTGCTTGGAGGGGGATGGGGATTGGAA
ASCRP000224	59.6667	60.1667	68.8333	58.1667	78.8333	55.3333	127.667	101	85.1667	93.8333	93	91.6667	5.89582	6.2024	6.40399	5.9975	6.49771	6.01949	5.97089	5.60511	6.20626	6.22426	5.71892	5.45907	A	A	A	P	P	A	P	A	A	P	A	A	hsa_circRNA_001200	hsa_circ_0001812	intergenic	chr8	+	79845977	79855306			AGAATGGACGCATCCTACAACCACAGTTGCTAACAGTATGAGTTCT
ASCRP000225	61.8333	56.5	65.1667	61.3333	66.5	63.6667	157.833	132.5	84.6667	95.8333	105.5	118.667	5.93338	6.05389	6.31628	6.07966	6.17252	6.30174	6.21926	5.93623	6.22361	6.2631	6.04249	5.88817	A	A	A	P	P	A	P	M	A	P	M	P	hsa_circRNA_001201	hsa_circ_0001816	antisense	chr8	-	97304862	97305111	NM_014754	PTDSS1	TTATTGATTGACCTCCTAAAACATCAACACAGGTTCTCATCAGCTC
ASCRP000226	800.167	472	919.667	622.167	1159.83	935	1363.5	995	731.667	816.333	818	3296.17	10.2422	9.99435	10.293	10.1186	10.5834	10.4043	9.2683	8.89902	10.0928	10.2504	9.83721	10.2465	P	P	P	P	P	P	M	P	P	P	P	A	hsa_circRNA_001205	hsa_circ_0001892	antisense	chr9	+	130705441	130705609	NM_001035254	FAM102A	TCACAAGCAGGACTCTTCTCCAGCCCGGACACCTGCTCCTCAATGG
ASCRP000230	558.333	314	822.5	455.167	622.5	612.167	1262.67	955.167	557.667	857.833	875	1442	9.69802	9.38878	10.0581	9.57999	9.82322	9.92646	9.17114	8.84361	9.62028	10.3255	10.0077	9.41928	P	P	P	P	M	P	A	P	P	P	P	P	hsa_circRNA_001216	hsa_circ_0000238	intronic	chr10	+	53459000	53459207	NM_001098512	PRKG1	TCCGAGAAAATGCTCTTTAACTCCTCCTTATTCTTTTCACTGGCAG
ASCRP000231	272.667	177.667	188.667	253.167	182.667	155.833	1499.5	2820.33	141.167	213.667	335.333	841.667	8.68052	8.46765	8.00551	8.66233	8.02863	8.05218	9.46863	10.8441	7.3724	7.84014	8.37802	8.75689	P	P	P	P	P	P	P	P	P	P	P	P	hsa_circRNA_001225	hsa_circ_0000305	intronic	chr11	-	47540449	47541488	NM_001172639	CELF1	AGTGCCCGTGTGAGTGATTTGAAGGATGTGACAGATGATTTAAGTG
ASCRP000232	631	428.667	607	571.667	842.5	740.333	1036.83	1322.33	569.333	640.667	943.5	2587	9.87476	9.85172	9.59634	9.96785	10.1753	10.1586	8.80997	9.3597	9.65576	9.78596	10.1743	10.0295	P	P	A	A	P	P	P	P	P	P	P	A	hsa_circRNA_001233	hsa_circ_0000463	antisense	chr12	-	132609079	132609271	NR_003290	EP400NL	AGGACTGTGACTTCCTGAATGCACTGCACTGCTCCCTGTCACATGC
ASCRP000235	74	60	70.3333	81.8333	76.1667	65	459.667	581.333	95.5	129	170	242.167	6.29676	6.21778	6.45861	6.55	6.49348	6.403	7.61679	8.099	6.50901	6.91527	7.08034	7.05363	P	A	A	P	P	P	P	P	P	P	P	P	hsa_circRNA_001240	hsa_circ_0000507	intronic	chr13	+	113869721	113869956	NM_001008895	CUL4A	ATCTCTGTGTGACTATGGAGGTCACGTCCCATGTGGCTGTGGAGGT
ASCRP000236	119.333	95.1667	88.6667	149.333	114	85	1153	1898.67	125.167	167.833	250.5	489.167	7.25254	7.21092	6.83576	7.66996	7.24348	7.01718	9.01654	10.0299	7.1433	7.44805	7.86698	8.047	P	P	P	P	P	P	P	P	P	P	P	P	hsa_circRNA_001241	hsa_circ_0000508	intronic	chr13	+	113869912	113870043	NM_001008895	CUL4A	GGCTATGGAGGTCACGTCCCGTGTGGCTGTGGAGATCTCTGTGTGA
ASCRP000238	74.8333	64.3333	61.8333	71	67.6667	62	262.167	257.833	80	98.6667	113.833	137.833	6.35986	6.42395	6.1509	6.34839	6.27892	6.32817	6.8682	6.88488	6.031	6.34842	6.21759	6.12477	P	A	A	P	P	A	P	P	A	P	P	P	hsa_circRNA_001255	hsa_circ_0000630	intronic	chr15	+	73026945	73027159	NM_001252678	BBS4	GCTGTGGAAGGTGGAATGGGCAGGGCTTCCAGAGCAGCTGTTTTTG
ASCRP000239	312.167	201.5	341.667	240.667	299.333	215.833	809.667	1032.83	304.667	442	434.833	621.5	8.89108	8.64252	8.90961	8.59716	8.8048	8.58453	8.43712	8.94686	8.66465	9.12232	8.80591	8.35981	P	P	P	P	P	P	P	P	P	P	P	P	hsa_circRNA_001259	hsa_circ_0000077	intragenic	chr1	-	62171487	62175109	NM_032027	TM2D1	GGCCATCTATTTTCCTGTTTTCCAGCACCCAACATAACTTGTAAGG
ASCRP000240	98	96	104	154.5	108.833	137.167	1043.67	1642.67	139.833	142.833	204.5	471.667	6.84137	7.28948	7.08698	7.75429	7.12705	7.85379	8.82466	9.7577	7.3859	7.11598	7.44362	7.98426	P	P	P	P	P	P	P	P	P	P	P	P	hsa_circRNA_001264	hsa_circ_0000086	antisense	chr1	-	76694158	76694273	NM_001160011	ST6GALNAC3	GCTTCACATGGTTTTAAAATGTGCTGCTGTGGTTTGACCTAGAGTA
ASCRP000241	57	50.3333	51.8333	78.1667	53.6667	48.6667	146.5	153.833	74.6667	91	95.3333	110	5.74994	5.80657	5.89775	6.35857	5.75124	5.70698	6.13042	6.20139	5.75622	6.14642	5.84089	5.81747	A	A	A	A	A	A	P	M	A	P	A	P	hsa_circRNA_001275	hsa_circ_0001131	intronic	chr20	-	7980924	7981203	NM_021156	TMX4	TTGAAGGGGGAGCTCCTGTCATAAAAGCCAAGCACAAGGAAGAAAG
ASCRP000244	116.5	110.667	70	100.667	96.1667	70.3333	2092.67	1161.67	102.167	124.833	274.167	432.167	7.17931	7.52429	6.45156	6.94267	6.89711	6.60862	10.1197	9.12399	6.71053	6.84692	8.02913	7.86672	P	P	A	P	P	P	P	P	P	P	P	A	hsa_circRNA_001288	hsa_circ_0000999	intragenic	chr2	-	46795476	46795608	NR_104182	LOC100506142	ATAAAGGATACTTTCTGGAGGTTGGTGGTCCAGTAGCACAGATAAG
ASCRP000245	103.333	79.3333	135.5	85.5	112.333	91.8333	280	279	149.667	236.667	219.667	235	6.92619	6.82352	7.5168	6.6453	7.19921	7.1552	6.94023	6.98833	7.46571	8.02796	7.58344	7.02341	P	A	P	P	P	A	P	P	P	P	P	A	hsa_circRNA_001296	hsa_circ_0001297	intragenic	chr3	-	47755904	47787933	NM_003074	SMARCC1	AATTCCAGAAAAACCATGGAAGACAGCATCTCACTCTGTCATCCAG
ASCRP000248	5278.67	3307.83	3192	2829.5	2829	3341	7942.67	12572.7	2477	2014.5	2525.67	19818.7	12.6723	12.7089	12.2098	12.1706	11.6426	11.9941	12.8328	13.5789	11.945	11.8957	11.8231	12.3737	P	P	P	M	P	P	P	M	P	P	P	A	hsa_circRNA_001302	hsa_circ_0001416	intragenic	chr4	+	57976053	57976143	NR_034081	IGFBP7-AS1	CGGGTAGGTGGTGCCCTTGCTGACCTGGGTGATGGCCTTCTCCCCG
ASCRP000250	74.1667	71.3333	71.6667	66.1667	60.1667	65.1667	163.167	298.333	86.6667	93.5	116	148.5	6.32793	6.62527	6.42161	6.21847	5.98087	6.37729	6.26225	7.09519	6.23114	6.1983	6.28652	6.24033	P	A	A	P	A	A	P	P	P	P	P	M	hsa_circRNA_001309	hsa_circ_0001561	intronic	chr5	-	177652366	177652583	NR_103508	PHYKPL	GGACGTGGTGGCATTTGATATATACCAAACAAACAAGCAAGTGACT
ASCRP000253	197.333	260.333	103.667	396.667	185.833	159	2216.17	4664	188.333	268.667	549.333	2696.5	8.11845	9.05694	7.08583	9.39055	8.06724	8.10024	10.2341	12.0584	7.90092	8.22982	9.20797	10.0755	M	P	P	P	P	P	P	P	P	P	P	P	hsa_circRNA_001350	hsa_circ_0000253	intronic	chr10	-	97999787	97999925	NM_001114094	BLNK	CTTAGGTGGTGTGGGAAGATCTGTCTGAGAAGAAACAAGAAAGCAA
ASCRP000255	223.167	263.333	188.167	268.167	359.167	230.5	844	445.833	123	137.667	171.333	497.833	8.3285	9.08257	7.99674	8.75097	9.04217	8.68403	8.47966	7.70092	7.08544	7.05722	7.09739	8.06853	P	P	P	P	P	P	P	P	P	P	P	P	hsa_circRNA_001359	hsa_circ_0000157	intronic	chr1	-	169663839	169664181	NM_000655	SELL	TGGGGCAGGGAGAGTATGGGAGCCAGAGGAACATCATTATCTAATA
ASCRP000256	146	125.333	116.667	134	94.6667	140.667	1003.67	1388.33	113	144.833	196.5	500.5	7.60318	7.80021	7.29384	7.4912	6.8791	7.91375	8.76019	9.45362	6.90024	7.1647	7.37061	8.08815	P	A	P	P	P	P	P	A	P	P	P	P	hsa_circRNA_001363	hsa_circ_0000172	intronic	chr1	-	201475259	201475620	NM_001193570	CSRP1	TATATCATGAAGAGGTGGCTTGGAGTCTTGCTGGGAAGTGATAAAG
ASCRP000259	1772.33	833.167	940	1562.17	2079	1548.67	2044.33	1355.33	813.333	545	1969.83	15793.7	11.3127	10.8708	10.3381	11.3507	11.3289	11.1518	10.073	9.40613	10.2839	9.44805	11.291	12.0896	P	P	P	P	P	P	P	M	P	P	P	P	hsa_circRNA_001379	hsa_circ_0000516	antisense	chr14	+	20811398	20811483	NR_002312	RPPH1	TCTGGCCCTATCTGACCTCGCGCGGAGCCCCGTTCTCTGGGAACTC
ASCRP000260	107.333	84.1667	99.8333	115.667	90.1667	90.5	311.667	347.333	98.8333	119	141	189.833	6.97812	6.92804	7.00546	7.22464	6.79648	7.09607	7.09176	7.30926	6.62508	6.73508	6.69044	6.63858	P	P	P	P	P	P	P	M	P	P	P	P	hsa_circRNA_001380	hsa_circ_0000540	intragenic	chr14	+	55799534	55821940	NM_017943	FBXO34	AATTGAAAGCTAAGGAGGGGCTCAGTGGTTGCAGGTTGTGAGGTAT
ASCRP000263	236.333	261.167	209.167	409.167	221.333	160.167	2144.83	4689.17	158.667	200.5	329.167	715.333	8.43424	9.06674	8.16726	9.44035	8.36563	8.09139	10.1675	12.0725	7.57489	7.76334	8.3345	8.53707	P	P	P	P	M	P	P	P	P	P	P	P	hsa_circRNA_001389	hsa_circ_0000729	intronic	chr16	+	90098243	90098338	NM_001286205	GAS8	AGGTGAGGAGGCATGTGTAGCTGTGTAAAGGTGAGGCATGCAAGTG
ASCRP000264	55	45.5	50.3333	52.3333	55.6667	53	99.6667	112.833	71.5	85.3333	104	126.833	5.73713	5.51897	5.77671	5.84263	5.81414	5.84339	5.72458	5.76085	5.64404	5.9753	5.99884	5.96953	A	A	A	A	A	A	P	P	A	P	A	M	hsa_circRNA_001393	hsa_circ_0000845	intragenic	chr18	+	42281139	42292759	NM_001130110	SETBP1	TCATTGAGGACACAGTTGCAGATCTGATCTCTTCTGAACACCTCAT
ASCRP000265	441	371.667	681.333	448.167	438	336.5	1423.33	1356.17	645.5	698.5	622.667	482.167	9.38873	9.65159	9.75477	9.56306	9.33495	9.18305	9.37178	9.40003	9.88943	9.93194	9.39863	8.01429	P	P	P	P	P	P	P	M	P	P	M	M	hsa_circRNA_001396	hsa_circ_0000912	antisense	chr19	-	17855662	17862204	NM_001161357	FCHO1	GGTGAAGCACCCATCTCATCACACCATATCAAAGCACCCATGGGAC
ASCRP000266	157.5	133.667	1347	131.5	220	250.333	1281.5	562	409.667	228.833	493.167	252.167	7.75984	7.9439	11.0194	7.43914	8.33902	8.8171	9.19688	8.06254	9.12331	7.98229	9.00873	7.13307	P	P	P	P	P	P	P	M	P	P	P	P	hsa_circRNA_001401	hsa_circ_0000965	intragenic	chr19	-	58472758	58476205	NM_152474	C19orf18	GAAAAGTTCATCCACTCAGGATTCCATTGTATCCCACCAGAAACAG
ASCRP000267	336.333	371.5	187.167	725.333	339.333	209	4890.17	9552.67	241.833	360	609.333	1265.33	8.98334	9.65057	8.00412	10.3829	8.95662	8.54263	11.8918	13.2153	8.3296	8.76356	9.39529	9.24587	M	P	P	P	P	P	P	M	P	P	P	P	hsa_circRNA_001405	hsa_circ_0001167	intronic	chr20	-	47316514	47316617	NM_020820	PREX1	TGAATGGATGGTAGATGGAGGCAGGTGCATGTGTGATGGGAAGTGT
ASCRP000268	99.6667	76.3333	102.833	81.8333	99	80.3333	274.5	280.667	119.833	150.667	166.333	211.5	6.87472	6.79567	7.08344	6.63405	6.96776	6.8909	6.92703	6.99604	7.06496	7.26966	7.04218	6.8353	P	P	P	P	P	P	P	P	P	M	P	P	hsa_circRNA_001408	hsa_circ_0001088	antisense	chr2	+	197889781	197889891	NM_001195144	ANKRD44	GTTTTTGTAACAGCCTGTGCCTTTTACCACGGACTACTTTCACTAC
ASCRP000269	220.667	163.667	154	208.5	159	151.833	1032.83	1520.83	158.333	230.167	310.333	1286	8.31786	8.335	7.71644	8.35778	7.80073	8.02505	8.80622	9.60429	7.56517	7.98833	8.22388	9.26214	P	P	P	P	P	P	P	P	P	P	P	P	hsa_circRNA_001409	hsa_circ_0001204	intronic	chr22	+	20070853	20070981	NM_001190326	DGCR8	GGCTGGGCAGGGTTTTGTCCACCTTGTGTCTGTAGCATCTAGGATG
ASCRP000272	841.667	572.333	841.667	572	1348.17	1164.17	970.333	974.667	623.667	614.667	718.333	3190.83	10.3407	10.343	10.109	9.95609	10.778	10.7319	8.70447	8.87479	9.82192	9.6693	9.62374	10.2172	P	P	P	P	P	P	A	P	P	P	P	P	hsa_circRNA_001416	hsa_circ_0001338	intronic	chr3	-	128824688	128825122	NM_001204883	RAB43	GTAGCCCGAGGTCCCTCTCTAATATGAAGAAGCAAGGAACTTTCCA
ASCRP000274	113.5	58.6667	61.3333	59.3333	59.6667	54.8333	110.167	122	82.1667	88.1667	82.5	110.167	7.12124	6.08595	6.17642	6.06232	5.97207	5.95754	5.81789	5.86167	6.12186	6.13472	5.44462	5.78144	P	A	A	P	A	A	P	P	A	P	A	A	hsa_circRNA_001426	hsa_circ_0001484	intragenic	chr5	+	54603970	54604181	NM_015360	SKIV2L2	TGCAGGCAGCGCAGGGTAAGGAAGAAGTTCCAGTTGTTGCTTTTAT
ASCRP000275	78.5	67.6667	79.6667	69.6667	78.3333	68.5	245.333	314.833	102.167	136	153.667	187	6.45295	6.53629	6.65479	6.32445	6.55986	6.61968	6.79198	7.16837	6.67622	7.04053	6.89891	6.64417	P	A	P	P	P	P	P	P	P	P	P	P	hsa_circRNA_001430	hsa_circ_0001516	exonic	chr5	+	96437462	96438798	ENST00000509481	CTD-2215E18.1	TCACACATAGGAGACGGGTTTGGCTCTGTGATTCATCAGAAATAAG
ASCRP000278	90.1667	89.3333	58.6667	119.833	89.3333	68.1667	1329.83	2819.5	95.1667	142.167	227.333	495.833	6.65653	7.08658	6.06764	7.2659	6.77904	6.53211	9.26029	10.8244	6.48735	7.03444	7.67121	8.07417	P	P	A	P	P	P	P	P	A	M	P	P	hsa_circRNA_001459	hsa_circ_0000301	intronic	chr11	-	47379617	47379952	NM_001080547	SPI1	AGCATGTATGTGTATATGTGAGCAGCTGTGCACGTATGATGTCAGT
ASCRP000279	417.667	285.667	455	330.333	420.833	341	789.667	928.667	416.167	583.333	548.333	943.333	9.32194	9.22682	9.28818	9.07041	9.28872	9.19917	8.39177	8.80423	9.16032	9.54914	9.20369	8.91538	P	P	P	P	P	P	A	P	P	P	P	P	hsa_circRNA_001465	hsa_circ_0000331	intronic	chr11	-	66625443	66625662	NM_000920	PC	ATGGCATTGCGAGACAGTGTCAGGTCCTCCAGGCTCTCTAGGAAGT
ASCRP000282	119.167	80.5	92.5	117.5	121.167	91.8333	288	222.667	131.167	135.333	169.167	222.333	7.2347	6.88875	6.86382	7.2518	7.34445	7.13429	6.98851	6.67236	7.21122	6.99903	7.05501	6.91168	P	P	P	P	P	P	P	P	P	P	M	P	hsa_circRNA_001486	hsa_circ_0000772	intronic	chr17	-	41854902	41855024	NM_004090	DUSP3	TCAATGTCTTCTTCATGGCTCAGCCCAAGGATGGCATGTTGAAAAC
ASCRP000283	61	55.3333	60.5	53.6667	63.3333	55.3333	165.333	212.333	69.6667	83.6667	95.3333	129.833	5.94229	6.00796	6.15941	5.85798	6.14248	6.02489	6.26888	6.60542	5.55041	5.90449	5.85496	6.02193	A	A	A	A	A	A	P	P	A	P	A	P	hsa_circRNA_001493	hsa_circ_0000851	antisense	chr18	+	52926327	52926446	NM_001083962	TCF4	TTTAGGTTTTGTTGCTGTTTTTACACTGGGCCATGAGAGCTGCATG
ASCRP000284	859.167	604	1036.67	1047	1306	1161.17	981.667	1060.5	716.5	745.333	756	1595.67	10.3745	10.4187	10.5469	10.8468	10.7132	10.7283	8.72025	8.98133	10.0583	10.0452	9.70283	9.55221	P	M	P	P	P	A	P	P	P	P	P	P	hsa_circRNA_001498	hsa_circ_0000916	intronic	chr19	+	19574204	19574328	NM_017660	GATAD2A	GGGGGCGGGGAGGGACACCGTAGCATTCCTCACCTCCCCCAGAGAA
ASCRP000285	121.5	117	125.667	160	116.333	87.6667	531.667	840.5	113.833	133.167	179.167	284.5	7.27736	7.63712	7.39576	7.80116	7.29455	7.09528	7.81254	8.6596	6.96439	6.94657	7.19943	7.31334	P	P	P	P	P	P	P	P	P	M	P	P	hsa_circRNA_001503	hsa_circ_0001191	intronic	chr21	+	38792600	38828610	ENST00000462274	DYRK1A	AGGAGGCTGCAGGTGGAGTGTTATAGTTTTGCCGCTGGACTCTTCC
ASCRP000286	43789.8	29048.2	30342	24621.8	52807.3	41710.3	50560.5	45196.7	21073.8	9649	30104	146321	15.4785	15.3566	15.2824	15.1504	15.5072	15.4795	15.5294	15.4305	15.0851	14.6118	15.2874	16.1283	M	P	P	P	A	M	M	P	M	P	P	M	hsa_circRNA_001506	hsa_circ_0000981	intronic	chr2	-	20240809	20240905	NM_014713	LAPTM4A	CGTCGTGATGGTAGTCTCCCACTATTTTATATCTTTGTTACTTCAA
ASCRP000294	356	215.833	160.667	373	240.333	186	1132.5	1523.67	199.833	213.5	404	1110.33	9.07925	8.74603	7.7773	9.30808	8.49164	8.36628	8.98084	9.61042	7.97046	7.85251	8.62729	9.10538	P	P	P	P	P	P	P	P	P	P	P	P	hsa_circRNA_001547	hsa_circ_0001874	intronic	chr9	-	95500310	95500614	NM_001003800	BICD2	AGGGCAGTGGGTGGGAGGGTGCAGGCACTGGCCTGGGGCTGCTCTT
ASCRP000299	76.1667	57.3333	84.6667	72.8333	74.1667	63.5	152	165.667	103.5	145	140.833	128.667	6.34371	6.18648	6.75951	6.42131	6.46015	6.37244	6.18432	6.24762	6.71305	7.16184	6.73436	6.00662	P	A	P	P	P	A	P	M	P	P	P	P	hsa_circRNA_001578	hsa_circ_0000090	antisense	chr1	+	89477809	89488389	NM_018284	GBP3	TTATCTTCAGTCCAGCATCAAGGTCCTCAGAATCATCTGGAAGCTT
ASCRP000300	555.667	539.5	475	436.667	565.167	669.667	938.333	792.5	522.167	518.167	523	1049.83	9.69247	10.2365	9.32794	9.52732	9.69161	10.0446	8.64701	8.55858	9.51461	9.38507	9.12677	9.04007	P	P	P	P	P	P	P	P	P	A	P	P	hsa_circRNA_001579	hsa_circ_0000869	intronic	chr19	-	2672918	2673380	NM_052847	GNG7	TTTTGTAAAATGTCCCCCAACGAACCCACATGCCATTGACTCCCGA
ASCRP000301	160.667	150	132.667	183	148.5	149.833	631.167	821.667	157.333	171.333	210.833	312.667	7.78838	8.15421	7.50664	8.07991	7.66947	7.99232	8.05139	8.62551	7.54326	7.47651	7.50025	7.43316	M	P	P	P	P	P	P	P	P	P	P	P	hsa_circRNA_001583	hsa_circ_0001054	intronic	chr2	-	100506410	100506635	NM_001025108	AFF3	ATTAAAGAAGTCTAACTTTCAGGCTGGATGCGCTGGTGTCCCATTA
ASCRP000302	272	303.833	177.833	502.5	271.833	176.833	3141	6134.67	219.833	305.667	553.667	1372.5	8.66287	9.32302	7.93203	9.72991	8.67579	8.26892	10.8246	12.5809	8.13199	8.43753	9.22143	9.33767	P	M	P	P	P	P	P	P	P	P	P	P	hsa_circRNA_001587	hsa_circ_0000979	intronic	chr2	+	19042277	19042456	TCONS_00003590	XLOC_001374	TTTGCAATGGTGGGGTGGTGAGGGATGCGGGCTGCAGGCAAGTATG
ASCRP000303	7574.17	5514.5	7769.83	5548.33	11299.7	8377.67	6513	3412.5	3935.33	3526.33	4437.5	24719.3	13.092	13.1473	13.4121	13.107	13.4396	13.253	12.4871	11.3041	12.8306	12.7761	12.5983	12.7367	P	P	P	M	P	P	P	P	P	P	P	P	hsa_circRNA_001594	hsa_circ_0001343	antisense	chr3	-	140954867	140955044	NM_001037172	ACPL2	AGCCGCCATCCATCTCTACTACCACATGTTTGAGTTCCCCCAAACT
ASCRP000310	2093.33	1874.67	780	3591.33	2014	1153.5	19460.5	32657.3	1394.83	2467.17	5058.33	22028.3	11.4922	12.0028	9.97265	12.4945	11.2969	10.7394	14.3026	15.0065	11.2893	12.2093	12.7621	12.525	P	P	P	P	P	P	P	P	P	P	M	M	hsa_circRNA_001653	hsa_circ_0001568	intronic	chr6	+	349113	349256	NM_020185	DUSP22	ACTTGTGTGTGGGTGACTAAGTGGATGCATGTGTGCCCCTGCACTC
ASCRP000311	388.833	369.667	223.5	757.667	477	312.5	5874.5	7924.33	295.833	481.667	847.333	1290.17	9.21255	9.64249	8.28172	10.446	9.46339	9.11521	12.2758	12.9975	8.62223	9.24082	9.93412	9.2735	P	P	M	P	P	A	P	P	P	P	P	A	hsa_circRNA_001654	hsa_circ_0001605	intronic	chr6	+	42903447	42905047	NM_006586	CNPY3	GGAAGGTCAGGCCTGCATGTATCTTAGTGTGTCTGCTGGTGTGAGT
ASCRP000313	213.667	169.5	157	198	197	151.667	679.167	805	216.833	244.167	288.333	527.333	8.23654	8.38271	7.73104	8.23264	8.1555	8.03608	8.15962	8.58661	8.12136	8.08218	8.11175	8.17401	P	P	P	P	P	P	P	P	P	P	P	P	hsa_circRNA_001671	hsa_circ_0000322	antisense	chr11	+	64557695	64559582	NM_004579	MAP4K2	GGATGCTCAGGTGCCAGTGTGGCCGTGGGCTCGCCCTGCATGTTGA
ASCRP000314	1303.5	1108.5	1458.83	1289.5	1960.33	1018.67	1272.33	936.667	1422.67	1861	1606.33	3937	10.8263	11.251	11.1718	11.1014	11.2689	10.5255	9.17974	8.81126	11.3219	11.7662	11.1197	10.4477	P	P	P	P	P	P	P	P	P	P	P	P	hsa_circRNA_001676	hsa_circ_0000423	exonic	chr12	-	80180153	80183460	ENST00000550903	PPP1R12A	AAAGGCCACCCAGCCCTGTAAGACCAGTAATAAATTTCTGTCTACT
ASCRP000315	278.333	83.6667	92.1667	305.667	221.833	180.333	283	445.333	186.167	108	535.333	1975.33	8.71681	6.95176	6.9027	8.947	8.36465	8.29244	6.96068	7.70067	7.85564	6.55879	9.15679	9.76614	P	P	P	P	P	P	P	P	P	P	P	P	hsa_circRNA_001678	hsa_circ_0000517	intragenic	chr14	-	20811404	20811492	NR_002312	RPPH1	TCCGCGCGAGGTCTGAGACTAGGGCCAGAGGCGGCCCTAACAGGGC
ASCRP000316	60.5	61.5	68.6667	55.3333	59.6667	58	119.167	125.667	80	95.3333	101	111.667	5.85347	6.21615	6.38995	5.93388	6.00694	6.21559	5.90044	5.87263	6.0366	6.24775	5.95529	5.79081	A	A	A	A	A	A	P	M	A	P	A	P	hsa_circRNA_001679	hsa_circ_0000565	intronic	chr14	+	96131229	96131329	NR_028288	TCL6	AAGGATTTGAACCCAGGTCGGCAGGAGACCAGCTGCTCTAGAAGAG
ASCRP000319	62.3333	56.1667	55.6667	59.3333	59.6667	57.6667	128.167	115	82.6667	89	112.833	112.333	5.97894	6.04367	6.00815	6.05398	6.02207	6.08314	5.97225	5.78172	6.15704	6.06066	6.26003	5.81388	A	A	A	P	A	A	P	P	A	P	P	A	hsa_circRNA_001701	hsa_circ_0000996	intronic	chr2	+	44729827	44732869	NM_024766	CAMKMT	AAATCCATGTGAAAAAGAACACTGAGAGCCCAGCATGCATATCCAC
ASCRP000322	104	95.6667	94.8333	110.333	86.6667	82.5	573	723.667	102.5	133.5	169.667	261.333	6.95495	7.20713	6.94899	7.1508	6.7775	6.92244	7.91926	8.40187	6.72121	6.99668	7.07965	7.17232	P	P	P	P	M	P	P	M	P	P	P	P	hsa_circRNA_001724	hsa_circ_0000191	intronic	chr1	+	227074478	227074748	NM_000447	PSEN2	AGGGCTGCTGGATGTGTCCTGAGCTGAAGCTTATCAACAAGTAATG
ASCRP000326	74.6667	65.3333	71.6667	83.8333	59.6667	58.1667	406.167	236.333	83.6667	85.5	105.5	125.5	6.36362	6.43834	6.50378	6.60823	5.95529	6.1665	7.41676	6.75416	6.12466	5.99688	6.06126	5.94647	M	A	A	P	A	A	P	P	A	P	A	P	hsa_circRNA_001747	hsa_circ_0000246	exonic	chr10	+	74468040	74475660	ENST00000604679	MCU	ACATTCGCAGGGAGTGGAGGAAGAGGTGAAGATGTGGAAAGCCCAG
ASCRP000328	131.833	102.5	125.833	103.333	159	126.333	188.333	196.833	155.667	142.667	158.667	266.833	7.39713	7.36185	7.41098	6.98876	7.77186	7.74479	6.43353	6.50405	7.54115	7.11291	6.96269	7.21412	P	P	P	P	P	P	P	M	P	P	P	P	hsa_circRNA_001754	hsa_circ_0000559	exonic	chr14	-	89747293	89750866	ENST00000557718	FOXN3	AAGAGAAATGGAGCCCTTCTCCAAGGGAAGGATGACTAAGAGTTTA
ASCRP000333	152.667	160.167	102.333	283.333	154.167	88.1667	1661.33	2594.83	122.667	223.333	324	491	7.67179	8.25221	7.05817	8.81859	7.73933	7.05691	9.66569	10.6587	7.10738	7.94354	8.28717	8.05463	P	P	P	P	P	P	P	M	P	P	M	P	hsa_circRNA_001800	hsa_circ_0001033	intronic	chr2	+	74716766	74716870	NM_022492	TTC31	GCTAACTCAGGGTGGGTTATGTGGAGCTGTTCATACTGCAGATATG
ASCRP000334	84.5	70.6667	80.8333	70.3333	78.8333	86.5	129.333	127.5	136	124.833	110.667	141	6.57131	6.60946	6.69166	6.31559	6.53916	6.96951	6.00993	5.90619	7.31132	6.83567	6.16743	6.17105	P	P	P	M	P	P	P	M	P	P	P	P	hsa_circRNA_001805	hsa_circ_0001659	intronic	chr6	+	157431605	157435966	ENST00000414678	ARID1B	AGAGTGAGAGATGATGCAACCTACTTCTCTCTAGAGGTAGTCAGAT
ASCRP000335	133.5	104.167	107.5	124.167	115.667	92.6667	168.833	170.333	123.333	160.667	139.667	134.833	7.44638	7.37161	7.13796	7.33456	7.25065	7.17846	6.29944	6.29848	7.10073	7.35201	6.69862	6.12519	P	M	P	P	P	P	P	P	P	P	P	P	hsa_circRNA_001808	hsa_circ_0001713	intronic	chr7	+	70991002	70991109	NM_022479	WBSCR17	TATTAGACTTAACTGTTAGAGATTTTTAGTGCCAGCCACCACGCCC
ASCRP000336	58.8333	49.8333	55.6667	54.3333	52	53	108.167	130.667	76.5	84	94.6667	109.333	5.82739	5.71518	5.95666	5.87977	5.69061	5.84068	5.79142	5.92533	5.8043	5.94584	5.79251	5.75395	A	A	A	A	A	A	P	P	A	P	A	P	hsa_circRNA_001818	hsa_circ_0000066	antisense	chr1	-	44890310	44890442	NM_018150	RNF220	GATGAGGAAGGTCTGGGCACATACAGTCACTTGATCAGCAATAAGA
ASCRP000338	69	61.3333	76.1667	67.3333	67.1667	62	183	209.167	100.833	124	125.667	158.667	6.19165	6.22749	6.59505	6.19894	6.22897	6.33506	6.40986	6.58575	6.59954	6.84627	6.48389	6.35049	P	A	P	P	P	A	P	P	P	P	P	P	hsa_circRNA_001820	hsa_circ_0000728	intronic	chr16	+	89979183	89979271	ENST00000539976	MC1R	GTGCCCTGAGGGCTGAGCCACGTGTGCCCATCTCAGACGTGGGCCT
ASCRP000339	75.3333	50.3333	56.1667	96.3333	90.6667	57.8333	175.667	152.167	77	78.5	158.833	282.333	6.37417	5.7188	5.99613	6.83268	6.78332	6.1473	6.35327	6.161	5.92879	5.69528	6.94583	7.29915	P	A	A	P	P	A	P	P	A	A	P	P	hsa_circRNA_001826	hsa_circ_0001190	exonic	chr21	+	38792600	38794168	uc031rvi.1	DYRK1A	AAGTAGATGCTCACTTTCGACTGAGTGTTATAGTTTTGCCGCTGGA
ASCRP000340	174.667	140.833	232.833	163.667	193.333	136.5	525.5	409.833	178.667	243	234.333	290.333	7.92185	8.00446	8.33519	7.84923	8.12937	7.86331	7.79423	7.57671	7.78964	8.07076	7.7288	7.34415	M	P	P	P	P	P	P	M	P	P	P	A	hsa_circRNA_001830	hsa_circ_0001370	antisense	chr3	-	183448510	183448699	NM_018023	YEATS2	AGTAAACCAGCCATCACTGCTCTTATATACGTATATTCTCTCCTTA
ASCRP000341	62.6667	68	68	73.6667	67.1667	56.5	633	508.833	85.1667	105	144.5	134.833	5.99938	6.51752	6.36281	6.41426	6.23414	6.08955	8.05489	7.93061	6.20186	6.50782	6.7593	6.1055	A	A	A	P	P	A	P	P	P	P	P	P	hsa_circRNA_001838	hsa_circ_0000249	intronic	chr10	+	76213950	76285184	NM_001202450	ADK	GAAATGAGACATTGTTTTCCTACTGTTTGTTGGTGGCATACTTTGT
ASCRP000342	54.1667	48.8333	43.3333	67.6667	62.8333	50.8333	186.667	422.833	72.3333	87.3333	132.333	232.333	5.70889	5.65357	5.46232	6.25571	6.12406	5.86741	6.41524	7.61354	5.69853	6.05032	6.58022	6.9879	A	A	A	P	P	A	P	P	A	P	P	P	hsa_circRNA_001844	hsa_circ_0000422	intronic	chr12	-	76476906	76477009	NM_004537	NAP1L1	TGGGACTGAGGTGTTAGTATAAACTTTGCCAAGTTTGTAGCCTGCA
ASCRP000343	741.333	153.833	249.833	845.333	683.167	598.833	523	810.667	506.333	186.667	1194.67	17947.7	10.1052	8.18584	8.45699	10.618	9.97217	9.89191	7.77581	8.59186	9.48019	7.61222	10.6188	12.2583	P	P	P	P	M	P	P	P	P	A	P	M	hsa_circRNA_001846	hsa_circ_0000520	intragenic	chr14	-	20811436	20811559	NR_002312	RPPH1	CTCCCTGAGCTTCGGGGAGGGAAGCTCATCAGTGGGGCCACGAGCT
ASCRP000346	109.5	81.3333	72.3333	54	64.6667	64.3333	113.5	126.5	84.6667	87.8333	89	101	7.07044	6.90231	6.48213	5.93468	6.16007	6.4343	5.86254	5.88047	6.15924	6.11645	5.67968	5.67314	P	P	P	A	A	A	P	M	P	P	A	A	hsa_circRNA_001882	hsa_circ_0001142	intragenic	chr20	-	33148403	33245340	NM_080476	PIGU	GAAGAGGCAGGCATAAATGAGACATTTTTGAGAGTTGGTAAGAGTT
ASCRP000347	583.167	372.5	283.333	598.667	477	392	1048.17	838.667	419.5	497.667	437.167	706.667	9.77258	9.66023	8.63171	10.0495	9.4629	9.35783	8.83677	8.65754	9.16048	9.3056	8.81082	8.51674	P	P	P	A	P	P	P	M	P	P	P	P	hsa_circRNA_001886	hsa_circ_0001212	exonic	chr22	-	24056373	24057381	NR_024448	GUSBP11	AGGGCTTCTGTCAGGCCCCACCGTGGACATGCCGGTTCCCTCCAGC
ASCRP000348	64.3333	56.1667	66.8333	53.3333	63.5	58.6667	150.833	191.5	90	100.167	117	138.333	6.08211	6.04392	6.32326	5.85995	6.12553	6.22647	6.16181	6.44627	6.37258	6.37598	6.32392	6.14718	A	A	A	P	A	A	P	P	P	P	P	P	hsa_circRNA_001896	hsa_circ_0001446	intragenic	chr4	+	144530863	144566308	ENST00000511042	GUSBP5	CGTGAGGATGAGTGTCCTCATTTCTCAATTTGCTCTTCATATTAAT
ASCRP000349	168.167	126.833	85.1667	134.833	132.5	84.1667	278.667	282.5	105.167	116.333	167.667	2076	7.84187	7.81007	6.76981	7.5125	7.45851	6.96926	6.94402	7.01998	6.74422	6.70808	7.06639	9.80843	P	P	P	P	P	P	P	P	P	P	P	A	hsa_circRNA_001899	hsa_circ_0001602	intronic	chr6	-	42012350	42012461	NM_001136017	CCND3	TGAAGTAGGGGGTTAGTCAGGTCAAATTCTGGAAGATTGCAGCAAA
ASCRP000350	126.667	98.6667	93.3333	119	109.833	98.8333	214.167	220.5	118	132.167	131	187	7.33193	7.3041	6.88299	7.27372	7.19262	7.28022	6.60732	6.65369	7.03245	6.99498	6.55708	6.62057	P	P	P	P	P	P	A	P	P	M	P	P	hsa_circRNA_001914	hsa_circ_0000902	antisense	chr19	+	15510546	15510663	NM_014371	AKAP8L	TTTGCTGTTAGGTACCTGCTGGCGCTCATCACTCAGGTGGTGGGAT
ASCRP000351	99.6667	71.5	112.5	85.8333	84	78	360.333	422.167	108.833	142	187.167	196.167	6.84746	6.60882	7.23523	6.68522	6.66599	6.83492	7.24988	7.61554	6.87396	7.14549	7.26472	6.71908	P	A	P	P	P	P	P	P	P	P	P	P	hsa_circRNA_001915	hsa_circ_0000092	intronic	chr1	+	93305053	93305167	NM_000969	RPL5	CCTGTGTCCAGTCCTTGGTACATAATGCTGGGAATTACTTTTAAAG
ASCRP000352	58.3333	49	65.6667	54.8333	60.3333	54.5	282.5	256.667	87.1667	106.333	111.833	122.833	5.87194	5.62234	6.28047	5.866	6.05675	6.03614	6.96243	6.87637	6.20092	6.46483	6.19311	5.96582	A	A	A	P	A	A	P	P	A	P	P	P	hsa_circRNA_001937	hsa_circ_0000700	intronic	chr16	+	53155459	53155541	NM_025134	CHD9	TGAACATATCCCTTGGATACTCTAAGACCTGACCCTGATTAAGTGG
ASCRP000354	224.833	196.667	173	232.5	161.667	172.833	1535.67	2112.33	182.667	242	316.667	646.167	8.3562	8.59303	7.90416	8.5446	7.82472	8.22775	9.51772	10.2133	7.81649	8.06721	8.25322	8.4037	P	P	P	P	P	P	P	P	P	P	P	P	hsa_circRNA_001950	hsa_circ_0000273	intronic	chr11	-	3177371	3177731	NM_001144063	OSBPL5	ATGGGGCCTGGCGGGCTTTGGGCTTTACTATATATGGATGGATCCA
ASCRP000355	67.5	55.6667	74	55.3333	65	62.8333	145.5	161.167	94.6667	117.833	126.333	117.5	6.14594	6.02416	6.53331	5.88014	6.20024	6.40846	6.13261	6.23318	6.50118	6.72954	6.49954	5.89852	A	A	P	P	P	A	P	P	P	P	P	P	hsa_circRNA_001952	hsa_circ_0000493	antisense	chr13	+	72128689	72129042	NM_004392	DACH1	GAAAAATATAGGTCAGAAAATTCCACCTTTGGCCTTGCTATTAATC
ASCRP000356	260.5	248.5	330.167	266.5	252.167	185.167	712.833	444	208.833	231.167	229.333	335.5	8.61068	8.97809	8.85514	8.73472	8.56132	8.34302	8.23504	7.68473	8.06295	8.00676	7.66694	7.51666	P	P	P	P	P	P	A	M	P	P	P	P	hsa_circRNA_001955	hsa_circ_0001202	exonic	chr22	+	17525762	17528316	TCONS_l2_00017566	XLOC_l2_009285	TGACAGCCCCATGGTAACCCAGAGAACACAGCCGAAGTGGAATGTG
ASCRP000360	69	56	59.5	60.6667	61.1667	55	264.667	296.667	82.3333	94.6667	112.333	162.5	6.1763	6.00429	6.09201	6.05646	6.05515	5.99401	6.87456	7.08005	6.10398	6.20994	6.22251	6.38092	A	A	A	P	A	A	P	P	A	P	P	P	hsa_circRNA_001978	hsa_circ_0001903	intragenic	chr9	-	139620450	139620843	NR_002975	SNORA43	AACCCTGAGGTGAGGTGACTTCGCCTGTGATGGACTTCCAGTGTGA
ASCRP000365	118.833	94.3333	128.333	96.1667	103.833	90.1667	242.5	217.667	146.333	167.167	164.5	210.5	7.21165	7.18239	7.44381	6.86899	7.05112	7.09454	6.76017	6.6406	7.4402	7.44904	7.04073	6.82892	P	P	P	P	P	P	P	P	P	P	P	P	hsa_circRNA_002006	hsa_circ_0001837	intragenic	chr9	+	4841204	4860901	NM_001286699	RCL1	GGGGCTCCAAAATGACATCCTTAACTCCAGGCTGCAGGTACTCTGT
ASCRP000370	206.833	149.333	390.667	188.5	267.833	199.167	971.167	1412	307.667	714.333	728.333	900.333	8.18618	8.15314	9.11378	8.13751	8.66214	8.45734	8.7071	9.48433	8.68357	9.97262	9.64393	8.86098	P	P	P	A	P	P	A	P	P	P	P	A	hsa_circRNA_002039	hsa_circ_0001748	intronic	chr7	-	132738876	132739917	NM_017812	CHCHD3	TTCAGAATGAAGAGAGATGAGGTCTCACTGTTTTTCCCAGGCTGAA
ASCRP000371	492.5	390.667	684.667	487.667	635.333	687.333	1203.33	1121.83	501.333	686.167	720.667	975.333	9.53615	9.73086	9.75753	9.67931	9.86075	10.068	9.08405	9.06247	9.45923	9.90319	9.62641	8.95495	P	P	P	P	A	P	M	P	P	P	P	P	hsa_circRNA_002042	hsa_circ_0000204	intragenic	chr10	+	1117078	1118233	NM_014023	WDR37	AGAAGGACAAAACCATCCCCTGCTCTTGGGACTTGGGCCAGTCTTT
ASCRP000372	430.5	339.167	435.667	345	517.333	360.5	736	771.167	384.167	413.833	498.333	1544.5	9.3641	9.50763	9.22723	9.15685	9.57254	9.26625	8.28376	8.50343	9.00746	9.00099	9.04889	9.49668	P	P	P	P	P	P	P	M	P	P	P	P	hsa_circRNA_002044	hsa_circ_0000228	exonic	chr10	+	31661946	31676195	ENST00000437844	ZEB1	GCCACCTTGTTCTCTAAAGTTTTCAGTTTAAATTCTCAACTGGCAA
ASCRP000374	139.833	115.5	148.333	111.167	136.667	116.5	275	343.5	165.167	193	195.333	357.333	7.51442	7.61942	7.6452	7.15289	7.53291	7.56594	6.90405	7.29902	7.62136	7.67232	7.36221	7.61751	P	M	M	P	M	M	M	M	M	M	M	M	hsa_circRNA_002048	hsa_circ_0000727	exonic	chr16	-	89484691	89497734	NM_001256182	ANKRD11	TCAGCTATGGAATCGCCCGTGCAGCCTGCCAGGACTCTTCCAGACA
ASCRP000375	66.8333	64.1667	60.6667	54.6667	62.1667	58	144.167	143.333	82.6667	94.8333	104.333	124.5	6.11122	6.38107	6.163	5.90313	6.08055	6.15648	6.10502	6.05653	6.13092	6.23192	6.07823	5.99896	A	A	A	P	A	A	P	P	P	P	P	P	hsa_circRNA_002050	hsa_circ_0000738	exonic	chr17	+	5113044	5126779	NR_034082	LOC100130950	AGAAGAATGAGGACACTTGTTTAACAAGACATCTGCCCATGTCCCT
ASCRP000379	162.333	122.333	324	169.333	197.167	173.833	482	695.167	229.5	305.667	330.5	410.5	7.81034	7.74013	8.82406	7.92567	8.16128	8.25201	7.67829	8.35053	8.21292	8.43281	8.34336	7.80846	A	P	P	M	P	P	P	P	P	P	P	P	hsa_circRNA_002086	hsa_circ_0001693	exonic	chr7	-	30590251	30601744	ENST00000434399	AC005154.6	CTATCCACAGTTTTCCTAAAATTCCCTTTTCCACTGGTGTGTGGTG
ASCRP000380	122.667	97	148	96.1667	116.667	92.1667	217.5	217.167	184.667	149	157.667	228.667	7.27113	7.28145	7.66957	6.85637	7.27443	7.16339	6.6347	6.63251	7.83648	7.22154	6.93837	6.96652	A	P	P	P	A	P	P	P	P	P	P	P	hsa_circRNA_002106	hsa_circ_0000053	exonic	chr1	-	36826821	36828257	ENST00000473733	STK40	GCTGGACCATTCATCCTTGAGAACATCAGTTACTTTTATATGAAGA
ASCRP000381	76	57.5	51.6667	88	79.6667	52.1667	160.167	161	72.5	77.8333	117.5	238.833	6.37793	6.07498	5.84516	6.73834	6.55611	5.86931	6.22954	6.24565	5.68214	5.70874	6.3278	7.04118	P	A	A	P	P	A	P	P	A	A	P	P	hsa_circRNA_002111	hsa_circ_0000443	intragenic	chr12	-	116668337	116675510	NM_015335	MED13L	TATTTTTCAGGCTGAACTCACGGGAATCAAATGGCGTAGGTACAAT
ASCRP000383	559.667	341	275.667	775.167	706.5	377.333	693.333	776.333	350.5	302.167	414.833	740.833	9.71072	9.51152	8.5921	10.4844	10.0014	9.31728	8.19376	8.52341	8.85213	8.40867	8.73212	8.57785	P	P	P	P	M	P	P	A	P	P	P	P	hsa_circRNA_002117	hsa_circ_0000332	intronic	chr11	-	66626276	66626387	NM_000920	PC	AGCAGGGTTGGCGGCGATGTCCGAGGGCCCGGGGCGGCCCCCCTCG
ASCRP000384	1365.83	158.167	240	256.167	212.333	226.333	771	1369.83	396.833	891.333	587.667	939	10.9211	8.24761	8.38084	8.68067	8.28409	8.66997	8.3589	9.42641	9.07375	10.3837	9.33082	8.90547	P	P	P	P	P	P	P	P	P	P	P	P	hsa_circRNA_002143	hsa_circ_0001907	intragenic	chrUn_gl000220	+	100404	123082	NR_003285	RNA5-8S5	ATTTGTGGAATCCTCAGTCATCGACACACAAGACAGAGACAAGGTA
ASCRP000385	1392.33	260.667	330.5	1351.33	875.833	693.667	3128.17	3482	823.333	318.333	3628	23098	10.9717	9.06049	8.85167	11.1753	10.2647	10.0784	10.8097	11.3414	10.3106	8.50324	12.4172	12.6101	M	P	A	P	P	P	P	P	P	A	P	P	hsa_circRNA_002144	hsa_circ_0000511	intragenic	chr14	-	20811282	20811431	NR_002312	RPPH1	AGTGAGTTCAATGGCTGAGGTGAGTTCCCAGAGAACGGGGCTCCGC
ASCRP000386	271	198	228	184.667	216.333	188.5	450.5	468.333	255	240.667	231.667	672.833	8.65503	8.61492	8.31306	8.07669	8.30921	8.38472	7.58527	7.78907	8.41034	8.04661	7.69364	8.45105	P	P	P	P	P	P	P	P	P	P	A	P	hsa_circRNA_002149	hsa_circ_0001627	intronic	chr6	-	90959407	90981660	NM_001170794	BACH2	CTGGGCTCAGCGCGTTCGTTCACATAGCTCCCAGTTTTAACATTTC
ASCRP000389	4118.5	679.5	906.833	5541.67	3407.17	1971.67	4061.33	6168.83	3195.83	1192	10686.5	15612.3	12.3664	10.6146	10.2513	13.1012	11.8299	11.3961	11.5218	12.5879	12.4636	10.9648	13.9105	12.0703	P	A	P	P	P	P	P	P	P	P	M	P	hsa_circRNA_002172	hsa_circ_0000514	intragenic	chr14	-	20811305	20811436	NR_002312	RPPH1	TTGGAACAGACTCACGGCCAGCGAAGTGAGTTCCCAGAGAACGGGG
ASCRP000390	3135.67	1501	2008.33	2224.67	1868.33	1824.67	3277	3407.33	2038	1460.33	2419	12413.3	11.9568	11.7468	11.614	11.8193	11.2171	11.2992	10.9372	11.2996	11.7514	11.3166	11.6792	11.753	P	P	P	P	A	P	P	M	P	M	P	P	hsa_circRNA_002178	hsa_circ_0000519	intragenic	chr14	-	20811436	20811534	NR_002312	RPPH1	CTTCGGGGAGCTGAGTGCGTCCTGTCACTCCACTCCCATGTCCCTT
ASCRP000391	3435.83	2835.83	3644.17	3500.5	5831	4729.5	2400.67	2235.33	3224.67	3073.33	3123.67	10955.3	12.1325	12.4937	12.4178	12.4464	12.5037	12.4681	10.3448	10.3738	12.4758	12.5853	12.1567	11.5797	P	P	P	M	P	P	M	A	P	P	P	P	hsa_circRNA_100001	hsa_circ_0009189	exonic	chr1	+	871151	874792	uc001abx.1	SAMD11	CCCAGCCACGCCAGGACGGCAACCTTCCCACCCTCATATCCAGCGT
ASCRP000394	191	148.833	181.333	194.167	186.333	178.833	744.5	678.833	237.167	276.833	297.667	535.5	8.06163	8.11912	7.94535	8.18785	8.06503	8.297	8.30095	8.32319	8.2902	8.2916	8.15224	8.18966	P	P	P	P	P	P	P	P	M	P	P	P	hsa_circRNA_100004	hsa_circ_0009244	exonic	chr1	-	1158623	1164326	uc001adh.4	SDF4	AAAGTGGATGAGGAAAACTGTGAGCTGCTTGTCCCCATCCTGCGGC
ASCRP000395	73.3333	57.8333	62.8333	54.6667	59.5	59.6667	115.5	121.333	73.3333	89	97.3333	160.167	6.30727	6.1902	6.25158	5.90292	5.96703	6.24386	5.87348	5.8513	5.70745	6.0725	5.88805	6.33628	P	A	A	A	A	A	A	P	A	P	A	P	hsa_circRNA_100005	hsa_circ_0008063	exonic	chr1	-	1192371	1192690	uc001adm.3	UBE2J2	GGACTTCACGGTGGCTATTATCATGGAAAACTAATTTTTCCCAGAG
ASCRP000396	56	50.1667	57.8333	52.8333	51.1667	53.3333	99.8333	106.667	78.6667	88	95.6667	126	5.78019	5.79885	6.04157	5.84479	5.70609	5.94021	5.70745	5.68511	5.93017	6.01577	5.86939	6.02472	A	A	A	A	A	A	P	P	A	P	A	P	hsa_circRNA_100006	hsa_circ_0009250	exonic	chr1	-	1192371	1203372	uc001adm.3	UBE2J2	ATAGAGACGTCGGACTTCACGATGAGCAGCACCAGCAGTAAGAGGG
ASCRP000397	114.167	113	137.667	105	82.3333	95.1667	286	177	102	113.167	127.833	164.667	7.12692	7.52218	7.54378	7.03428	6.61343	7.2231	6.97394	6.36087	6.68351	6.59871	6.52874	6.42032	P	P	P	P	P	P	P	P	P	P	P	P	hsa_circRNA_100007	hsa_circ_0009252	exonic	chr1	-	1198725	1203372	uc001adm.3	UBE2J2	AGAGATGACCCCTTATGAAGATGAGCAGCACCAGCAGTAAGAGGGC
ASCRP000398	79.3333	61.8333	92.8333	74.5	79.6667	80.6667	269.667	246	112	136.833	145.833	217.833	6.44765	6.25557	6.90824	6.443	6.57679	6.87774	6.90027	6.82399	6.8873	7.02066	6.76277	6.8797	P	A	P	P	P	P	P	P	P	P	P	P	hsa_circRNA_100008	hsa_circ_0009343	exonic	chr1	-	1721833	1722035	uc001aif.3	GNB1	AGTCTGACATCAATGCCATTTGCTGCCCTGTGGGACATCGAGACCG
ASCRP000399	224	143	306.667	156.5	174	173.5	702.333	717.833	236.167	292	340.667	435	8.32895	8.05718	8.74059	7.7591	7.95375	8.23137	8.21312	8.39764	8.279	8.36045	8.40679	7.87609	P	P	A	P	P	P	P	P	P	P	P	P	hsa_circRNA_100009	hsa_circ_0009344	exonic	chr1	-	1721833	1724750	uc001aif.3	GNB1	TGCCATTTGCGTTACCTGTCCTGCTGCCGATTCCTGGATGACAATC
ASCRP000400	61	49.1667	42.6667	59.6667	54.6667	54.5	108.167	110	76.5	79	102.667	170.333	5.91565	5.70788	5.46217	6.0698	5.81804	5.94828	5.79467	5.71601	5.83268	5.72802	6.00013	6.45427	A	A	A	P	A	A	P	P	A	A	A	P	hsa_circRNA_100010	hsa_circ_0009349	exonic	chr1	-	1724683	1749314	uc001aif.3	GNB1	ACACCACGTGGACGCCAGGAAAGCATGTGCAGATGCAACTCTCTCT
ASCRP000401	140.833	89.8333	115.5	134.5	121.667	105.5	266.667	238.667	131.833	160.667	198.5	362.667	7.52781	7.09874	7.28267	7.4933	7.37461	7.40088	6.88728	6.77162	7.25353	7.36815	7.41054	7.64522	P	P	P	A	P	P	P	P	A	P	P	P	hsa_circRNA_100011	hsa_circ_0000007	exonic	chr1	-	1735857	1737977	uc001aif.3	GNB1	GGACACACAGGCTTCTCGTCAGTGCCTCGCAGGATGGTAAACTTAT
ASCRP000402	97.6667	90.3333	90.3333	104.5	91.1667	81.5	216.833	151	93.3333	94.8333	135.167	215.333	6.82428	7.10871	6.80047	7.0416	6.87242	6.92328	6.62457	6.13029	6.46236	6.27646	6.61869	6.87731	P	A	P	P	M	P	P	P	P	P	P	P	hsa_circRNA_100012	hsa_circ_0009353	exonic	chr1	-	1735857	1749314	uc001aif.3	GNB1	GGACACACAGGACGCCAGGAAAGCATGTGCAGATGCAACTCTCTCT
ASCRP000403	112.333	73.3333	90.1667	104.667	105.667	92	254.333	193.5	105.333	112	175.333	464.833	7.10607	6.63136	6.83878	7.00544	7.08863	7.16608	6.83591	6.47729	6.76498	6.6228	7.14723	7.96586	P	A	P	P	A	P	M	P	P	P	P	P	hsa_circRNA_100013	hsa_circ_0006869	exonic	chr1	-	1735857	1756938	uc001aif.3	GNB1	CTGGCAGGACACACAGATCTCACATTCTTGAAGGTGGCATTGAAGA
ASCRP000404	122.333	87.6667	106.333	99.3333	101.5	89.3333	277.333	161.167	110	116.667	137.833	210.833	7.29448	7.08232	7.10505	6.911	7.06246	7.05861	6.93616	6.24034	6.86198	6.71081	6.66814	6.83012	P	P	P	P	A	P	P	P	P	P	P	P	hsa_circRNA_100014	hsa_circ_0005907	exonic	chr1	-	1735857	1770677	uc001aif.3	GNB1	GGCAGGACACACAGACAAATTTACATGTATTGGAGACCAGACCAGA
ASCRP000405	87	81.1667	79.6667	79.6667	79	69.5	165.333	140.333	83	85.5	123.833	196.667	6.61908	6.89783	6.64914	6.56658	6.54076	6.61131	6.27301	6.04066	6.09859	5.98246	6.39745	6.7	P	P	P	P	P	P	P	P	A	P	A	P	hsa_circRNA_100015	hsa_circ_0009357	exonic	chr1	-	1737913	1749314	uc001aif.3	GNB1	CACCAACAAGGACGCCAGGAAAGCATGTGCAGATGCAACTCTCTCT
ASCRP000406	98.1667	76.1667	78	99.8333	86.1667	83.5	328.833	156.333	112.5	117.167	152.667	247	6.84428	6.74459	6.56823	6.9321	6.68794	6.96196	7.11786	6.18853	6.89036	6.6997	6.86902	7.07918	P	A	P	P	P	A	P	A	P	P	P	P	hsa_circRNA_100016	hsa_circ_0009360	exonic	chr1	-	1747194	1749314	uc001aif.3	GNB1	CAGACTCCAGGACGCCAGGAAAGCATGTGCAGATGCAACTCTCTCT
ASCRP000407	186	124.833	153	181.333	167.833	153.167	353	315.333	174.333	201.833	289.167	762.667	8.01399	7.77731	7.69881	8.04573	7.89528	8.02558	7.22459	7.16559	7.73075	7.76836	8.11387	8.62219	P	P	P	P	P	P	P	P	P	P	P	P	hsa_circRNA_100017	hsa_circ_0000008	exonic	chr1	-	1747194	1756938	uc001aif.3	GNB1	GGGGCACAGACTCCAGATCTCACATTCTTGAAGGTGGCATTGAAGA
ASCRP000408	7576.5	2928	4237.33	3019.5	10117.3	7006.33	13144.3	2278.17	2179.83	1654	2962.67	26009	13.0908	12.5477	12.6358	12.266	13.2449	12.8883	13.5456	10.4168	11.8108	11.565	12.0499	12.8343	P	P	P	M	P	P	P	P	P	P	P	P	hsa_circRNA_100018	hsa_circ_0009361	exonic	chr1	-	1749275	1770677	uc001aif.3	GNB1	CAACTCTCTCTCAGACAAATTTACATGTATTGGAGACCAGACCAGA
ASCRP000409	73.1667	53.8333	47.5	72.8333	68.1667	59	113.833	124.667	81.6667	90.3333	119.167	196.5	6.30096	5.93644	5.59496	6.3948	6.22385	6.21457	5.84668	5.8451	6.06103	6.0957	6.3468	6.70559	A	A	A	P	P	A	P	P	A	P	P	P	hsa_circRNA_100019	hsa_circ_0009362	exonic	chr1	-	1756835	1770677	uc001aif.3	GNB1	AACCAGATTCGAACAAATTTACATGTATTGGAGACCAGACCAGAAG
ASCRP000410	59.6667	55.3333	64.5	53.3333	65.3333	54.3333	171.833	189	85	102.667	116.667	134.5	5.86098	6.00653	6.22232	5.84166	6.14548	6.05808	6.33654	6.44985	6.18936	6.42136	6.27082	6.13338	A	A	A	P	P	A	P	P	P	P	P	P	hsa_circRNA_100020	hsa_circ_0009434	exonic	chr1	-	3761470	3761915	uc010nzm.1	CEP104	AAGGAACGTACGCCAGGTTGCTTTGGTTGCCATAAATATCATTGGA
ASCRP000411	682.333	503.833	671	496.5	938.5	947.667	1225.33	527.167	419.667	399.167	516	2072	9.98671	10.0944	9.73715	9.71516	10.3474	10.4134	9.12142	7.98135	9.18547	8.94758	9.11209	9.81089	P	P	P	P	P	P	P	P	P	A	P	P	hsa_circRNA_100021	hsa_circ_0009456	exonic	chr1	-	5987708	6022009	uc001als.2	NPHP4	CACGTCCCCTTCGAAAAACAGACACATGACCCTCATTGAGAACTGC
ASCRP000412	76.6667	84.6667	83.5	69	71.1667	64.5	147.667	131.333	87.5	97.3333	110.167	130	6.38416	6.9338	6.71778	6.28092	6.35263	6.49537	6.12474	5.94764	6.23944	6.32827	6.17508	6.0541	P	P	M	P	P	P	P	P	P	P	P	M	hsa_circRNA_100022	hsa_circ_0009461	exonic	chr1	-	6007163	6022009	uc001als.2	NPHP4	GAGTGGACGGCAATAAAACAGACACATGACCCTCATTGAGAACTGC
ASCRP000414	153.333	132.333	159.5	134.833	132	131	734.667	444.333	146.167	166.167	177	253.5	7.70232	7.86251	7.77121	7.49656	7.4669	7.78996	8.27657	7.69655	7.44408	7.42558	7.17116	7.12613	P	P	P	P	P	P	P	P	P	P	P	P	hsa_circRNA_100024	hsa_circ_0009135	exonic	chr1	-	6021853	6029319	uc001als.2	NPHP4	GCTCATGGAGAATCCGCCCTTGTATTTTCACACATCCCTAAACCAC
ASCRP000417	245.5	167.667	260.5	216.333	297	312.833	697.667	827.167	292.167	332.167	390.167	2000.67	8.49998	8.36691	8.51119	8.40181	8.79222	9.10861	8.20707	8.63689	8.59403	8.59147	8.62894	9.76571	P	P	P	P	P	P	M	P	P	P	P	A	hsa_circRNA_100027	hsa_circ_0007427	exonic	chr1	-	6291961	6293703	uc001amk.3	ICMT	ATTGGAACTCAGGTACATGTGCTCCCTGTCATTGTTCCACTATTCT
ASCRP000418	116.5	83.1667	146.333	99.6667	116.5	104.833	294.5	256.5	165.833	212.5	202.5	216	7.19982	6.91555	7.64361	6.95	7.28182	7.38823	7.01115	6.87213	7.64119	7.84006	7.42657	6.86326	P	P	P	P	P	P	P	P	P	P	P	P	hsa_circRNA_100028	hsa_circ_0009524	exonic	chr1	-	6589053	6593501	uc010nzs.2	NOL9	TTGGGCTTTGGACCACCTTTCACTCACCTGAGGACTCCACAGAAGA
ASCRP000419	76.6667	67.6667	69	67.3333	76	66	132.667	185	110	107.333	123.333	189.5	6.41784	6.52926	6.4062	6.25068	6.46789	6.46694	6.01544	6.41091	6.8466	6.46304	6.45381	6.63393	P	A	A	P	P	P	P	P	P	P	P	P	hsa_circRNA_100029	hsa_circ_0009535	exonic	chr1	+	6679862	6680397	uc001aob.4	PHF13	AGGACATCATGGTGGACTCAGGAACTCCCTTTAAGGAGCAGCCCCA
ASCRP000421	84.6667	75.5	78	79	89.8333	66.3333	118.5	159.333	114.667	110	116.167	193.667	6.56474	6.77467	6.62772	6.5414	6.78613	6.50321	5.88441	6.21812	6.94848	6.55219	6.28559	6.68664	P	P	P	P	P	P	P	P	P	A	P	P	hsa_circRNA_100031	hsa_circ_0009577	exonic	chr1	-	8525984	8674745	uc001ape.3	RERE	AAGTGCTGGACCGAGGACGAAGTGGTCCACAACTCCCAGGCCTGTT
ASCRP000422	73.6667	75	60.1667	82.3333	75.1667	70.6667	113.667	167	93.6667	103.833	107	129.833	6.28532	6.70797	6.17193	6.63054	6.47677	6.60925	5.85768	6.28209	6.48595	6.45987	6.1255	6.03757	M	M	A	P	P	P	P	P	P	P	P	P	hsa_circRNA_100032	hsa_circ_0009580	exonic	chr1	-	8555122	8568734	uc010nzx.1	RERE	TCTGAATGCACTGAACACAGAGGCTGAACAGTACCCAGGGGGAGAT
ASCRP000423	3631.17	1985.67	2699.5	2246.5	6208.67	4238.67	778.667	1382	1257	628.5	1679.83	63961.7	12.2158	12.053	12.0223	11.8338	12.604	12.3087	8.37641	9.43931	11.0732	9.72368	11.1363	14.1022	P	P	P	P	P	P	P	P	P	P	P	P	hsa_circRNA_100033	hsa_circ_0009581	exonic	chr1	-	8555122	8601377	uc001ape.3	RERE	ACTGAACACAAGGGAAGTGTAACATCTCCCATTTTTCTGACATATT
ASCRP000424	167	120.5	153.333	139.167	172	127	202.667	257.667	173.333	155.167	181.333	533.833	7.86631	7.68319	7.71561	7.56174	7.91981	7.73457	6.53094	6.8803	7.72976	7.29433	7.22246	8.14764	P	M	P	P	P	P	P	P	P	P	P	P	hsa_circRNA_100034	hsa_circ_0006837	exonic	chr1	-	8555122	8617582	uc001ape.3	RERE	GAATGCACTGAACACAAGTAAGAGGGACCATCTCCTCATGAACGTC
ASCRP000425	203.833	147	195.667	185.833	201	161.167	517.5	354.667	213.5	256.833	243.167	469	8.16615	8.10623	8.06946	8.1094	8.18918	8.12823	7.77718	7.35813	8.08906	8.15506	7.81111	7.97398	P	P	P	P	P	P	P	P	P	P	P	A	hsa_circRNA_100035	hsa_circ_0009117	exonic	chr1	-	8555122	8674745	uc001ape.3	RERE	CTCTGAATGCACTGAACACAGTCCACAACTCCCAGGCCTGTTGCAG
ASCRP000426	135	99	122.667	103.333	108.333	72.5	836.167	210.833	136	159.167	148.833	226.667	7.45349	7.31524	7.37127	7.00978	7.11671	6.64074	8.48962	6.58942	7.342	7.35394	6.83259	6.94646	P	P	P	P	P	A	P	P	P	P	P	P	hsa_circRNA_100036	hsa_circ_0009582	exonic	chr1	-	8555122	8684439	uc001ape.3	RERE	ACACCACTCTGAATGCACTGAACACAACTGTGTGTATATCGAGAGT
ASCRP000427	80.5	63.6667	61.8333	79.5	81.8333	61.6667	190.167	218.167	94	97.3333	110.667	179.333	6.47273	6.36484	6.20325	6.55114	6.58798	6.32153	6.45384	6.64382	6.47256	6.31712	6.19067	6.55707	P	A	A	P	P	A	P	P	P	P	P	P	hsa_circRNA_100037	hsa_circ_0002158	exonic	chr1	-	8601272	8617582	uc001ape.3	RERE	TTAGGATATAACCCTGAGACAAGAGTAAGAGGGACCATCTCCTCAT
ASCRP000428	106.667	78.3333	70.6667	156.333	140.667	71.6667	213.5	376.667	99.6667	106.333	184.333	346.333	7.03413	6.85477	6.42893	7.74369	7.5915	6.67584	6.60089	7.44008	6.65745	6.48367	7.22237	7.55943	P	P	P	P	P	P	P	P	M	P	P	P	hsa_circRNA_100038	hsa_circ_0008501	exonic	chr1	-	8601272	8674745	uc001ape.3	RERE	TCTACATATTAGGATATAACCCTGAGACAAGGTCCACAACTCCCAG
ASCRP000429	175	122.833	206.833	198.667	207.667	148.167	532	760	193	267.833	343.667	608	7.93744	7.74823	8.16716	8.23558	8.24264	7.9954	7.81434	8.48335	7.90261	8.21238	8.42186	8.33486	P	P	P	P	P	P	P	A	P	P	P	P	hsa_circRNA_100039	hsa_circ_0009590	exonic	chr1	-	8616533	8674745	uc001ape.3	RERE	ATTACGTTGACACTTACCATGCTGCTGCCCTTAGGTCCACAACTCC
ASCRP000430	101	90.5	58.6667	113.667	98.3333	72.5	879.667	1421.5	306	228.333	254	539.167	6.86344	7.12705	6.0884	7.1978	6.94385	6.68044	8.55712	9.49037	8.66371	7.97705	7.88624	8.18484	M	A	A	P	P	P	P	P	P	P	P	P	hsa_circRNA_100040	hsa_circ_0009594	exonic	chr1	-	8674619	8684439	uc001ape.3	RERE	GCCTGTAGGGACTGTGTGTATATCGAGAGTCGGAGGCCAAACACAC
ASCRP000431	58	57.1667	42.6667	72.6667	59.6667	47.5	416.167	504.333	68.5	73.6667	106.333	182.667	5.84851	6.07926	5.4472	6.3627	6.04174	5.69795	7.45546	7.90839	5.52821	5.53275	6.13081	6.58919	A	A	A	P	A	A	P	P	A	A	P	P	hsa_circRNA_100041	hsa_circ_0005039	exonic	chr1	-	8674619	8716500	uc001ape.3	RERE	GCCTGTAGGGCATTTTTGAAACGTTGGGGTTGTTGGAGTGGTTGGA
ASCRP000432	112.667	84.1667	111.333	102.5	108.5	86.5	193.167	182.833	143.167	160	156	178	7.12065	6.93823	7.23331	6.98975	7.14505	7.0354	6.46471	6.4069	7.42792	7.34635	6.89916	6.51977	P	P	P	P	P	P	P	A	P	P	M	M	hsa_circRNA_100042	hsa_circ_0009610	exonic	chr1	-	8922945	8923402	uc001api.2	ENO1	AGTACAACCAGCTCCTCAGGTGCAAGCTGGCCCAGGCCAATGGTTG
ASCRP000434	79.1667	258	202.5	247.5	238.333	193.333	212.667	655.5	190.333	166.833	203.5	518.333	6.43544	9.04402	8.13388	8.63611	8.49002	8.43247	6.59563	8.27602	7.90358	7.45235	7.46	8.1389	P	P	P	P	P	P	A	M	P	P	M	P	hsa_circRNA_100044	hsa_circ_0009654	exonic	chr1	+	9770162	9770654	uc001aqa.2	PIK3CD	CATCAAGCAGCTGGTGGCCATGACTGGCTTTCGTGGATGTGTATGT
ASCRP000435	476.333	382.667	708.667	393.833	529.333	477.333	1148.67	920.667	560	697.333	651.167	813	9.49756	9.69582	9.81031	9.39486	9.60265	9.59837	9.00055	8.79395	9.63884	9.92697	9.49846	8.7131	M	P	P	P	P	P	M	P	P	P	P	P	hsa_circRNA_100045	hsa_circ_0009674	exonic	chr1	-	9931244	9938047	uc001aqk.1	CTNNBIP1	ATCGACCAGGGGCGGCACCTTCCTACTTCTGCCCAGCCACAGCCCT
ASCRP000436	55.5	44	50.3333	57.8333	60	49.3333	116.833	120.333	76	89.5	105.833	114.333	5.77803	5.41333	5.78733	5.96945	6.03556	5.76457	5.89707	5.82758	5.87633	6.13719	6.09689	5.82799	A	A	A	P	A	A	P	P	A	P	P	P	hsa_circRNA_100046	hsa_circ_0000014	exonic	chr1	-	9991948	9994918	uc001aqm.3	LZIC	AGTTTGAGAAAGTCTCTACAGACCTTGGCTATTCAGGCAGCTATCA
ASCRP000438	83.8333	91.8333	86.1667	94.1667	79.6667	65.6667	420.667	739.167	92	106.667	127.667	157	6.5565	7.12962	6.75841	6.86204	6.56146	6.49857	7.48175	8.43639	6.43146	6.51753	6.495	6.34138	P	P	P	P	P	A	P	P	A	P	P	P	hsa_circRNA_100048	hsa_circ_0009715	exonic	chr1	+	10420986	10435431	uc001aqy.3	KIF1B	GCACAATACGGACCTTCTACCGCTTTGAGGCTGTGTGGGATAGCTC
ASCRP000441	156.5	132.5	146	138.167	138	119.667	3128.5	313.333	412	426	480.333	756.333	7.74676	7.90696	7.64324	7.56053	7.56158	7.62357	10.7746	7.16297	9.14357	9.05032	8.97569	8.60492	P	P	P	P	P	P	A	P	P	P	P	P	hsa_circRNA_100051	hsa_circ_0009792	exonic	chr1	-	11181302	11182183	uc001asc.3	MTOR	CAGCTCCGAGCATCCAGAGATACGCTGTCATCCCTTTATCGACCAA
ASCRP000442	62.1667	56	61.3333	57.3333	57.6667	53.8333	137.667	152.667	79.3333	91	101.667	136.5	5.96457	6.05605	6.20482	6.00995	5.9184	5.89449	6.0563	6.15948	5.97977	6.12392	5.99823	6.1284	A	A	A	P	A	A	P	P	A	P	A	P	hsa_circRNA_100052	hsa_circ_0009904	exonic	chr1	+	12032928	12033054	uc001atm.3	PLOD1	TGGATTACGAGGCCCAGTTTGACCTGGCCTTTGTCGTCCGCTACAA
ASCRP000443	20588.2	17373.2	18345.7	11018.5	11876	15964.7	33844.2	43017.5	12349.7	11205.5	11021.5	38984.8	14.5351	14.7068	14.5432	14.0655	13.4994	14.0184	14.9836	15.308	14.4697	14.771	13.9724	13.3942	M	P	M	M	P	A	M	A	P	P	P	M	hsa_circRNA_100053	hsa_circ_0009910	exonic	chr1	+	12049221	12052747	uc001atn.4	MFN2	TTTTTGGCCGCGCAATGTCCCTGCTCTTCTCTCGATGCAACTCTAT
ASCRP000446	105	83.1667	101.833	112	109.5	81.3333	509	586.5	117	151	200.333	188	6.97184	6.94495	7.04309	7.17635	7.15668	6.93374	7.75079	8.11336	6.98216	7.2408	7.41808	6.61006	P	P	P	P	P	P	P	P	P	P	P	P	hsa_circRNA_100056	hsa_circ_0007677	exonic	chr1	+	12359258	12364785	uc001atv.3	VPS13D	CAAGAGTCCAGTAGTCCAGGTGAGAGATCAAGCCCAGCGCTGTTCA
ASCRP000448	121.333	84.3333	169.667	99	122.833	111.333	342	351.667	144.833	205.333	221.833	260	7.24821	6.97579	7.85282	6.92824	7.39058	7.52656	7.18577	7.34596	7.44326	7.79549	7.61394	7.18581	A	P	P	P	P	P	P	P	P	P	P	M	hsa_circRNA_100058	hsa_circ_0009986	exonic	chr1	+	12378128	12382803	uc001atv.3	VPS13D	ATCCTGTCTTGGATCTACCAAGGATTCCTCCTGCTTTACAGTAGTT
ASCRP000450	72.3333	60.1667	59.5	65.3333	62.5	60.8333	158	160.5	77.8333	95.8333	99	114.5	6.3029	6.23975	6.13332	6.20686	6.08161	6.30178	6.22964	6.24566	5.95831	6.21694	5.90454	5.88517	P	A	A	P	A	A	P	P	A	P	A	P	hsa_circRNA_100060	hsa_circ_0010023	exonic	chr1	-	12638745	12639440	uc001aub.3	DHRS3	ATGTTCCAGGGCATGAGAGTCAGGTGGGTGACATCACCATCCTGGT
ASCRP000452	59	47.3333	48.8333	63.5	53.1667	51	117.167	104.333	72.3333	79	91.5	120	5.88306	5.6699	5.71937	6.17037	5.75707	5.75923	5.90506	5.65584	5.67385	5.74257	5.70586	5.92162	A	A	A	P	A	A	P	P	A	A	A	P	hsa_circRNA_100062	hsa_circ_0005986	exonic	chr1	+	14057494	14068652	uc001avg.3	PRDM2	TTACTATAAAACTTTAAAGAACACTACTGAGCCTGTGGCGGCCACC
ASCRP000453	78.6667	73.5	68	72.8333	69.5	63.1667	201.833	264.667	77.5	82.3333	99.6667	140.333	6.44322	6.65472	6.31433	6.41905	6.29514	6.36254	6.52454	6.90139	5.92357	5.87406	5.86773	6.18784	P	A	A	P	P	A	P	M	A	A	A	P	hsa_circRNA_100063	hsa_circ_0010039	exonic	chr1	-	15844604	15844890	uc001awm.2	CASP9	ATTGGTTCTGGAGGATTTGGTGATGTCGCGGGCAGGCTCTGGATCT
ASCRP000457	66.3333	60.3333	59.3333	75	65.5	53.1667	116	118	83.3333	84	104.833	118	6.1041	6.1974	6.06919	6.45087	6.16916	5.86858	5.89427	5.8136	6.16277	5.92893	6.06	5.8806	A	A	A	P	P	A	P	P	A	P	A	P	hsa_circRNA_100067	hsa_circ_0000020	exonic	chr1	+	15964801	15978390	uc001awx.2	DDI2	GAGGATGCAGGCAACAGAACATTGAGGAAAACATGACAATAGCTAT
ASCRP000458	106.167	79.3333	106.5	97.3333	87.1667	84.1667	349	383.667	110.667	148.667	164.833	205.667	6.98905	6.80475	7.12949	6.90459	6.72453	6.96874	7.21501	7.46998	6.89034	7.2218	7.03759	6.78582	P	P	P	P	P	P	P	P	P	P	P	P	hsa_circRNA_100068	hsa_circ_0000021	exonic	chr1	+	16044387	16047883	uc010obo.2	PLEKHM2	GACTGGGAAGGCCGTGCCTGGCTGTACCTGGCCCTCAACGAGAACT
ASCRP000459	357.333	243.833	367.333	373.833	355.667	318.667	1136.83	958.667	350	462.5	441.667	515.5	9.07822	8.93295	9.02295	9.30159	9.01774	9.13022	8.9894	8.84279	8.8418	9.18354	8.83983	8.14702	P	M	P	P	P	P	P	M	P	A	P	P	hsa_circRNA_100069	hsa_circ_0002733	exonic	chr1	+	16046228	16047883	uc010obo.2	PLEKHM2	ACAGACTGGGAAGGATGCCCCTTACCTAGACCTGGCCCCCTACATG
ASCRP000460	89	80.3333	84.5	72.5	88.6667	73.8333	231.333	245.167	108.5	128.333	139.667	197.667	6.66613	6.8832	6.74112	6.3665	6.76042	6.72427	6.69997	6.81334	6.79445	6.88243	6.68639	6.7239	P	P	P	P	P	P	P	P	P	P	P	P	hsa_circRNA_100070	hsa_circ_0005240	exonic	chr1	-	16464347	16464925	uc010oca.2	EPHA2	AACCAGACAGCCTGCTCGCCTGGATTTTTTAAGTTTGAGGCATCTG
ASCRP000461	76.3333	65	70.8333	71.8333	70.8333	66.6667	162.833	175.333	93.5	108.333	117	161.5	6.38217	6.39082	6.42258	6.36	6.33305	6.47409	6.26363	6.34012	6.45074	6.55345	6.30084	6.37242	P	A	P	P	P	A	P	P	P	P	P	P	hsa_circRNA_100071	hsa_circ_0010146	exonic	chr1	-	16632297	16641930	uc001ayf.3	FBXO42	TTCTCGCACACTGTTGAGTGGAATGTCATGGCCAGCTCCTCGGACA
ASCRP000462	94.5	91.3333	67.6667	137.833	98.3333	78.3333	1072.33	2176.67	109.333	128.667	209.333	502.167	6.76626	7.13084	6.35947	7.54921	6.95022	6.83983	8.8765	10.2963	6.83598	6.8937	7.50217	8.1004	P	P	A	P	P	P	P	P	P	P	P	P	hsa_circRNA_100072	hsa_circ_0005562	exonic	chr1	+	17907047	17914974	uc001bap.3	ARHGEF10L	CCGGCACAGGGTGTGTAGCTGGGACGGTGCTGGTCTGAGCTGGACC
ASCRP000463	366.167	284.667	483.333	366	385.833	547.833	808.5	753.333	564.667	584.667	472.167	614.167	9.11541	9.22435	9.34803	9.27556	9.14138	9.79906	8.43325	8.47409	9.63629	9.55272	8.97464	8.34755	P	P	P	P	P	P	M	P	P	P	P	P	hsa_circRNA_100073	hsa_circ_0010358	exonic	chr1	-	19499357	19501527	uc001bbm.1	UBR4	TGCATCGTTCACCAGATGCTGTCCCACACCCCAGATTCTACTGTGT
ASCRP000465	93	76.6667	87	70.6667	94.8333	70.8333	252.833	281.333	115.167	133.333	148.5	213	6.71093	6.70493	6.79441	6.36305	6.91649	6.67448	6.83	7.00939	6.94177	6.97025	6.83164	6.86063	P	A	P	P	P	P	P	P	P	P	P	P	hsa_circRNA_100075	hsa_circ_0010386	exonic	chr1	-	19564510	19564633	uc001bbo.3	KIAA0090	GCCTGAGCGGGACTCTCTGGCTTGCTTCAATCAGACCTACACCATT
ASCRP000466	70.3333	66	68.1667	60.5	68	58.3333	110.5	106	79.6667	87.3333	87.1667	97.1667	6.20666	6.39926	6.36377	6.11804	6.26478	6.18077	5.82298	5.69659	6.01269	6.05323	5.62114	5.5209	P	A	A	P	A	A	P	P	A	P	A	A	hsa_circRNA_100076	hsa_circ_0010430	exonic	chr1	-	21024871	21031392	uc001bdr.4	KIF17	GATCCGGGAGATGAGCGGGGCAAGGACCACCTCCGGGCGGGCAAGC
ASCRP000467	110.333	66.1667	76	201	63.1667	94.6667	214.5	125.5	74.8333	134.5	90.3333	114.167	7.11236	6.4516	6.60095	8.2706	6.09712	7.21268	6.60918	5.88774	5.74834	7.01341	5.67787	5.84069	P	A	P	P	A	P	P	P	A	P	A	P	hsa_circRNA_100077	hsa_circ_0010433	exonic	chr1	-	21039946	21042132	uc001bdr.4	KIF17	GAAGCTGGAGGGCGTCACTGAGGGCTACAATGGCACCATCTTTGCC
ASCRP000469	93.5	72.3333	89.8333	60.1667	67.8333	61.3333	568.833	176.833	103	124.833	125.833	182	6.76626	6.64718	6.82865	6.06807	6.27991	6.27011	7.90481	6.33903	6.69498	6.8314	6.48166	6.5679	A	A	P	P	P	A	P	M	P	P	P	P	hsa_circRNA_100079	hsa_circ_0002437	exonic	chr1	-	21083658	21107033	uc001bdv.1	HP1BP3	GACATTCCAGGTTGATTCTTCACCACACTGAAACCATTAGGAAAAA
ASCRP000470	80.6667	57	47.8333	121.833	89.6667	58.8333	121.333	128.5	85.6667	84.8333	117.333	178.167	6.50405	6.06001	5.63564	7.32575	6.76331	6.2145	5.92364	5.90785	6.19666	6.00997	6.32161	6.54212	M	A	A	P	P	A	P	P	A	P	P	A	hsa_circRNA_100080	hsa_circ_0005782	exonic	chr1	-	21097422	21100103	uc001bdv.1	HP1BP3	CATCAAACAGTGAGAAAGATCAGTCTAAAGAAAAGGAGAAGAAAGT
ASCRP000473	1441.17	845.333	1111.83	1042	1715	1635.5	1582	1540.67	877.833	935.5	1012.17	5455.33	11.0452	10.8739	10.6727	10.8369	11.0915	11.1976	9.56646	9.63267	10.4493	10.4949	10.2938	10.8041	P	P	P	P	P	P	P	P	A	P	P	P	hsa_circRNA_100083	hsa_circ_0010486	exonic	chr1	-	21306826	21329301	uc001beg.3	EIF4G3	AATGCTTATGACCCCTTATCCCTCTGGACAGAATGCAGGTCCAACC
ASCRP000474	2658.33	1745.67	2009.67	2091	3301.67	2849.67	3021	2069.33	1517.33	1202.67	1566.5	8117.17	11.7903	11.8998	11.6049	11.7491	11.786	11.8161	10.7183	10.1638	11.4073	10.9831	11.0682	11.1984	M	P	P	P	P	P	P	A	P	P	M	P	hsa_circRNA_100084	hsa_circ_0007991	exonic	chr1	-	21329205	21415706	uc001bee.3	EIF4G3	AACCTCAAACCCGTTCTCCGAATTCCTAGAGGACCTGTGCAACAAC
ASCRP000475	486.167	262.833	345.667	252.5	560.667	394.167	1030.83	758	464	347.667	412.667	2846.67	9.52058	9.07744	8.9243	8.66067	9.67364	9.36763	8.80398	8.48772	9.34524	8.69465	8.70892	10.0965	P	P	P	P	P	A	P	P	P	P	P	P	hsa_circRNA_100085	hsa_circ_0005075	exonic	chr1	-	21377358	21415706	uc001bee.3	EIF4G3	CCTGGACTCTCTCAAAATTCCTAGAGGACCTGTGCAACAACCTCTT
ASCRP000476	114	76.1667	95.1667	78.5	147.667	105.333	413.833	215.667	118.5	118	139.333	427.667	7.1285	6.72556	6.92031	6.53887	7.58428	7.36788	7.44068	6.62796	7.02016	6.72317	6.6987	7.84573	A	P	A	A	A	A	P	P	P	P	P	A	hsa_circRNA_100086	hsa_circ_0000026	exonic	chr1	-	21377358	21437876	uc001bec.3	EIF4G3	GACTCTCTCAACAATCCCACAGAGTATTGATGAGGAAACTGAAGTT
ASCRP000477	58	57.8333	54	69.8333	57.5	56.6667	99.6667	121.5	76	79.6667	107.333	245.333	5.84387	6.06065	5.92068	6.33203	5.94356	6.1394	5.73164	5.84031	5.88605	5.74507	6.08701	7.08124	A	A	A	P	A	A	P	M	A	A	P	P	hsa_circRNA_100087	hsa_circ_0010497	exonic	chr1	-	21415630	21415706	uc001bee.3	EIF4G3	TCAGCAGTCTACAGCACGAATTCCTAGAGGACCTGTGCAACAACCT
ASCRP000478	101.333	100.833	123.333	100.333	107.833	83.8333	262.333	126	115.833	116.833	137.5	189.5	6.90255	7.34872	7.36285	6.93984	7.12466	7.00588	6.86779	5.91624	6.99011	6.69188	6.67267	6.646	P	M	P	P	M	P	P	P	P	P	P	P	hsa_circRNA_100088	hsa_circ_0005735	exonic	chr1	-	21415630	21437876	uc001beh.3	EIF4G3	TCTACAGCACGCAATCCCACAGAGTATTGATGAGGAAACTGAAGTT
ASCRP000479	233.5	216.333	259.167	297.5	387.167	318.833	333	259	237	227.5	250.5	260	8.409	8.72827	8.49833	8.8901	9.14035	9.13142	7.15259	6.88959	8.27492	7.96098	7.85512	7.17788	P	M	P	P	P	P	P	M	P	P	P	P	hsa_circRNA_100089	hsa_circ_0010501	exonic	chr1	-	21553651	21554534	uc001bei.2	ECE1	TTTGATGATCAAGGTGGAGCATGACCCCGCCCATGGTGAACGCCTA
ASCRP000480	9662.5	6191	7456.17	8453.67	12760.5	10507.7	6482.17	6679.67	7299	6069.33	6885.67	24068	13.4668	13.3507	13.3405	13.6927	13.5548	13.5845	12.4858	12.6927	13.735	13.8455	13.3959	12.6854	P	P	P	P	P	A	P	P	P	P	P	P	hsa_circRNA_100090	hsa_circ_0008563	exonic	chr1	-	21599191	21599404	uc001bei.2	ECE1	ATCAAGCACCTCCTCGGATCCCCCTCTGTGTGCCTGAGCGAAGCTT
ASCRP000481	185	170.5	234.167	209.833	210.333	167.333	643.5	297.667	245.833	278	285.333	363.333	8.01262	8.38083	8.35767	8.3621	8.26863	8.18686	8.07596	7.09332	8.35548	8.29047	8.10746	7.64848	P	P	P	P	P	P	P	A	P	P	P	A	hsa_circRNA_100091	hsa_circ_0002402	exonic	chr1	-	21599191	21616649	uc001bek.2	ECE1	AAGCAATCATCAAGCACCTCCTCGATGTCGACGTACAAGCGGGCCA
ASCRP000483	65.5	80.5	53.3333	62.3333	58.1667	52	292	681.667	75.6667	78.3333	104.667	131.167	6.05815	6.89393	5.9403	6.04049	5.91805	5.75028	6.99868	8.33061	5.85346	5.6872	6.05561	6.0596	A	P	A	M	A	A	P	P	A	A	A	P	hsa_circRNA_100093	hsa_circ_0004808	exonic	chr1	-	22047528	22048257	uc001bfe.1	USP48	CTTAAATAAAGTGAAAGCCCTGTGTAAGGAATGTGTAGTAGAACGT
ASCRP000484	89	80.6667	64	84	75.5	66	163.667	155	88.3333	94.6667	104.5	124.333	6.65462	6.87221	6.30785	6.64794	6.4762	6.46694	6.2632	6.15331	6.34036	6.25969	6.05001	5.9888	P	P	A	P	P	P	P	M	P	P	A	A	hsa_circRNA_100094	hsa_circ_0010735	exonic	chr1	-	22188249	22188608	uc009vqd.3	HSPG2	TACTGTGAGCACAATGCCAGCACAACGCCGCAGGGGAGTTCTGCGA
ASCRP000485	63.3333	48.6667	53	58.5	65	52	181.667	204.333	90.8333	84	128	163.667	6.03692	5.80314	5.90706	5.99853	6.1263	5.77019	6.39813	6.55504	6.45038	5.9292	6.47998	6.39477	A	A	A	P	P	A	P	P	P	P	P	P	hsa_circRNA_100095	hsa_circ_0005576	exonic	chr1	+	22404921	22413359	uc009vqg.1	CDC42	GGAGTGTTCTGCACTTACACAGGTCATCATCAGATTTGAAATATTT
ASCRP000487	104	67	74.6667	150.333	114.167	65.6667	119.833	179.833	78.8333	86.5	146.167	307.667	6.96044	6.46258	6.52936	7.68733	7.23526	6.493	5.91813	6.37031	6.03825	6.07685	6.80822	7.40671	P	A	A	P	P	P	P	P	A	P	P	P	hsa_circRNA_100097	hsa_circ_0009061	exonic	chr1	+	23356961	23377013	uc001bgi.2	KDM1A	ATTAGAAACCGCACAGTAGAGTACAGAGAGATGGATGAAAGCTTGG
ASCRP000488	60.6667	66.3333	52.8333	73.8333	72.8333	53.5	132.833	164.667	74.6667	80.8333	106	172	5.90954	6.45127	5.92148	6.44038	6.40614	5.95231	6.02427	6.25384	5.7718	5.87395	6.07058	6.48333	A	A	A	P	P	A	P	P	A	A	P	P	hsa_circRNA_100098	hsa_circ_0007822	exonic	chr1	+	23356961	23385660	uc001bgi.2	KDM1A	TTATGAAGCCAACGGACAAGCTGTAGAGTACAGAGAGATGGATGAA
ASCRP000489	69	58.3333	65.1667	73.8333	77.1667	65	136.667	137.5	97.3333	108.667	115	130.333	6.14012	6.14632	6.28127	6.41212	6.49342	6.44805	6.05442	5.99801	6.5587	6.54022	6.26479	6.07381	M	A	A	P	P	P	P	P	P	P	P	P	hsa_circRNA_100099	hsa_circ_0003757	exonic	chr1	-	24140679	24147083	uc001bib.3	HMGCL	TTCTGTGCGGGGGTCAGCACCTCATCTATGGGCACTTTACCAAAGC
ASCRP000493	81.5	59.8333	110.833	69.6667	74.5	71.1667	174.833	167.833	115	152	135.667	131	6.50353	6.16533	7.20885	6.28275	6.40418	6.60008	6.35226	6.27723	6.97032	7.26162	6.6273	6.05699	P	A	P	P	M	P	P	M	A	P	P	P	hsa_circRNA_100103	hsa_circ_0000033	exonic	chr1	+	26584087	26586293	uc001blr.3	CEP85	GGAAGAAAGGCTTCAGAATGGAGCCATCTGCCACCATCCTGCTGCT
ASCRP000494	87.6667	93	62.1667	147.5	97	68.3333	660.333	1283.67	86	102.5	150.667	160.167	6.63085	7.16952	6.2017	7.658	6.91838	6.52687	8.11874	9.30476	6.27455	6.42437	6.84186	6.3687	P	P	A	P	P	P	P	P	P	P	P	P	hsa_circRNA_100104	hsa_circ_0000034	exonic	chr1	+	26772806	26774151	uc001bmk.3	DHDDS	TGTTGGATCCCAGGGAGAAACTGCAGAAGCATGGGGTGTGTATCCG
ASCRP000498	1104.5	590.167	1488.5	843.167	1150.67	989.333	2000.67	1962.67	995	1370.33	1298	1719.67	10.6582	10.3864	11.2098	10.6192	10.5792	10.4798	10.0064	10.0822	10.658	11.2332	10.7777	9.63647	P	P	P	P	P	P	P	P	A	P	M	P	hsa_circRNA_100108	hsa_circ_0011002	exonic	chr1	+	26786527	26786635	uc001bmk.3	DHDDS	GAACCATAGCGTGCTTCAGACCTCTCACTCCTGCCTGGTGTTCCAA
ASCRP000499	53.1667	49.5	51.1667	44.1667	53.1667	46.3333	118.5	114	88	96	103.833	106.667	5.65935	5.68541	5.79014	5.52785	5.75946	5.64214	5.88276	5.77875	6.34604	6.2465	6.02594	5.76159	A	A	A	A	A	A	P	P	A	P	P	A	hsa_circRNA_100109	hsa_circ_0008494	exonic	chr1	+	27056141	27059283	uc001bmt.1	ARID1A	CAGCTTGCCTCCATCCAGTCCAATGGATCAGATGGGCAAGATGAGA
ASCRP000500	141.667	119	112.667	149.667	136.333	126.5	327.667	462.333	142.667	149.5	172.667	284.833	7.55294	7.68337	7.23563	7.66877	7.53472	7.73639	7.13918	7.77405	7.38845	7.22326	7.14161	7.29641	P	P	P	P	P	A	P	P	P	A	P	P	hsa_circRNA_100110	hsa_circ_0006913	exonic	chr1	+	27087346	27089776	uc001bmt.1	ARID1A	TATCCAAAACAGGATCTATCTGGTTCAATAGATGACCTCCCCATGG
ASCRP000501	65.3333	48.3333	55.1667	61.3333	57.6667	59.1667	137.333	143.667	81	90.3333	107.667	128.667	6.04716	5.63885	5.93283	6.08514	5.92239	6.22665	6.06334	6.07602	6.1161	6.09031	6.13913	6.02389	A	A	A	P	A	A	P	P	A	A	P	P	hsa_circRNA_100111	hsa_circ_0007283	exonic	chr1	-	27432375	27436268	uc001bnm.3	SLC9A1	CTTTGTGCAGGTCCTGTATCACCTCTTTGAGGAGTTTGCCAACTAC
ASCRP000502	199.333	148	273.167	204.5	214.5	217.333	539.167	726.833	272.333	366.5	410.833	884.833	8.12984	8.12169	8.59057	8.30604	8.29726	8.59382	7.83411	8.41368	8.50577	8.79899	8.71512	8.80325	P	P	P	P	P	P	P	P	P	P	P	P	hsa_circRNA_100112	hsa_circ_0002380	exonic	chr1	-	27440316	27440777	uc001bnm.3	SLC9A1	CGTCACTGTGGTTTCCATGTGATCCCCACTATCTCAAGCATCGTCC
ASCRP000503	57.3333	56	52	54.8333	55.3333	58	198.167	176.333	81.3333	102.833	105.167	125	5.81393	6.02898	5.90675	5.93928	5.84406	6.07823	6.49256	6.34992	6.09112	6.4615	6.06066	5.99554	A	A	A	P	A	A	P	P	A	P	A	P	hsa_circRNA_100113	hsa_circ_0011107	exonic	chr1	-	28223515	28224218	uc001bpe.1	RPA2	CAACAGCCAGGACACCAGCAGTGAAAACACTGTGGTTCCTCCAGAA
ASCRP000504	98.1667	84.6667	122.167	101.667	80.6667	84.5	189.833	157	94.1667	122.667	129.333	144.5	6.83953	6.97157	7.36828	6.94384	6.57484	6.98472	6.45968	6.19617	6.50935	6.80942	6.53406	6.19198	P	P	P	A	P	P	M	P	P	P	P	P	hsa_circRNA_100114	hsa_circ_0005866	exonic	chr1	-	28233438	28233793	uc001bpe.1	RPA2	TGACACAGATAGAGCCCGAGCCCAGCACATTGTGCCCTGTACTATA
ASCRP000505	70.1667	53.6667	66.6667	61.3333	66.8333	62.3333	120.833	137.667	85.3333	96.8333	119.667	126.667	6.20621	5.86443	6.30783	6.10673	6.20295	6.38388	5.92987	6.01068	6.23582	6.32013	6.33497	5.9958	A	A	A	P	A	A	P	P	P	P	P	P	hsa_circRNA_100115	hsa_circ_0011120	exonic	chr1	-	28362054	28369161	uc001bpi.2	EYA3	TACCTCCTTTTGTCAAGTAAGCAATCCAGATGTCAGTGATCAGAAG
ASCRP000506	60.6667	53.1667	62.1667	56.5	60.6667	58.8333	130.833	130.667	89	90.5	109.833	113.333	5.93839	5.88255	6.17168	5.89941	6.02504	6.17473	5.9915	5.94925	6.33641	6.17295	6.15915	5.83453	A	A	A	M	A	A	P	P	P	P	P	P	hsa_circRNA_100116	hsa_circ_0008057	exonic	chr1	-	28362054	28374937	uc010ofu.2	EYA3	ACTACCTCCTTTTGGTGAAAAAAGCCAAGATGCAGGAATCAGGAGA
ASCRP000507	238	136.333	243.333	168.667	218.333	231.833	489.5	330.833	167.5	295	308.167	611	8.45313	7.98269	8.41067	7.9121	8.3282	8.70043	7.69967	7.25907	7.67066	8.37463	8.20413	8.3167	P	P	A	P	P	P	P	P	P	P	P	P	hsa_circRNA_100117	hsa_circ_0007895	exonic	chr1	-	28362054	28384605	uc010ofu.2	EYA3	CCTCCTTTTGATTGTGAAAACTGCTGAGAGAGACTTGCAATCCAGT
ASCRP000509	73	51.6667	47.3333	111	75.3333	61.6667	122	180.167	84.3333	86.8333	127.333	218.167	6.31327	5.7539	5.59678	7.13549	6.49796	6.40742	5.91235	6.37198	6.23327	5.98024	6.51389	6.88817	P	A	A	M	P	A	M	P	A	P	P	P	hsa_circRNA_100119	hsa_circ_0002909	exonic	chr1	+	28800065	28800663	uc001bpx.3	PHACTR4	AAATGCTAAAAGTCTGAACTGTCCCAAGCAATAAACAGTGGTACAT
ASCRP000510	74.3333	56.6667	51.3333	116	74.5	63.6667	122.5	169	81.1667	90	123.167	186.167	6.38149	6.05691	5.88482	7.23187	6.44409	6.43489	5.91937	6.2765	6.04941	6.1519	6.4245	6.60269	P	A	A	P	P	A	P	P	A	P	M	P	hsa_circRNA_100120	hsa_circ_0000038	exonic	chr1	+	28800065	28802803	uc001bpx.3	PHACTR4	GAAAGCTATCAGACTGAACTGTCCCAAGCAATAAACAGTGGTACAT
ASCRP000512	168.667	102.333	184.333	139.5	151.833	133	405.667	373.5	189	290	264.833	293.833	7.81353	7.40116	7.98144	7.55366	7.70865	7.80856	7.41961	7.42902	7.88692	8.3507	7.96552	7.35246	P	P	P	P	P	P	P	P	P	P	P	P	hsa_circRNA_100122	hsa_circ_0011159	exonic	chr1	-	28931883	28948677	uc001bqx.3	TAF12	TCACAAACAGTTAATTGGCCTTGGTCCTCACAGCTCCAAAAAGAAA
ASCRP000513	72.1667	60.1667	66.6667	67.1667	65.5	70.3333	195	156.667	89.1667	114.833	111.833	160.5	6.26482	6.21238	6.35727	6.22743	6.21819	6.64481	6.47944	6.21022	6.33094	6.65496	6.22482	6.38453	P	A	A	P	P	A	P	P	P	P	P	P	hsa_circRNA_100123	hsa_circ_0011163	exonic	chr1	+	29010094	29023596	uc001bra.3	GMEB1	TCGGCTGATGCAGTCCCAGCTATCTGACTTCATGTGAAAGATGGCT
ASCRP000517	62.8333	47	44.5	74	58.6667	53.1667	106.667	119.333	71.6667	71.8333	109.833	181	5.93535	5.59246	5.55859	6.44245	5.98448	5.95299	5.79643	5.82876	5.59981	5.50024	6.18513	6.56555	A	A	A	P	A	A	P	P	A	A	P	P	hsa_circRNA_100127	hsa_circ_0006602	exonic	chr1	-	29481207	29481422	uc001bro.3	SRSF4	GTCATTCAAGGATTATATGCGTCAGGCAGGAGAAGTGACTTATGCA
ASCRP000519	68.5	53.5	90	59	71.3333	58.5	145	142.833	101	124.833	126	115	6.18499	5.85588	6.84231	6.03928	6.37866	6.19984	6.12427	6.05996	6.69286	6.86048	6.47831	5.83183	A	A	P	M	P	A	M	P	P	P	P	P	hsa_circRNA_100129	hsa_circ_0011218	exonic	chr1	-	31413997	31414970	uc001bsf.1	PUM1	AATTTGCAAGGTATTTGCCTTATCCACACATCCTTATGGCTGCCGA
ASCRP000524	72	61.3333	77	70.6667	80	63.3333	146.5	158.667	93	112.5	122.167	137.5	6.23522	6.24105	6.60524	6.30613	6.59758	6.37741	6.13054	6.21239	6.41763	6.63033	6.39996	6.14455	P	A	P	P	P	A	P	P	P	P	P	P	hsa_circRNA_100134	hsa_circ_0000044	exonic	chr1	-	31465236	31479949	uc001bsh.1	PUM1	ATTCTCAACAACAGCAGCTCTTGCCAGGTAAAAAGTTTTGGGAAAC
ASCRP000526	78.1667	74.5	57.8333	106.333	80.5	63.6667	977.833	1342	99.1667	135.333	213.5	363	6.44932	6.74141	6.05455	7.03424	6.54696	6.33187	8.71754	9.38591	6.60117	7.00748	7.51089	7.62605	P	M	A	A	P	A	P	P	P	P	P	A	hsa_circRNA_100136	hsa_circ_0000045	exonic	chr1	-	31532050	31532424	uc001bsh.1	PUM1	TAACATTCATGCAGAACATCAGGTGTTGGTGGAATGAGCGTTGCAT
ASCRP000529	3394	1900.17	2696.17	3360	3633.33	2718.83	5284	4913.33	2891	2657	3196.17	6865.17	12.1065	12.0069	12.05	12.4062	11.9309	11.7628	12.0544	12.176	12.2461	12.3784	12.1979	11.021	A	P	P	P	P	P	A	A	P	P	P	P	hsa_circRNA_100139	hsa_circ_0011279	exonic	chr1	+	31896539	31899670	uc001bst.3	SERINC2	CAAGGTCCAGGCGTCCTGCCTCTGCGGCTCTGCCCCCTGCATCCTG
ASCRP000530	70	63.8333	67.8333	65.6667	69.1667	69.6667	145.667	161.5	100.167	102.167	102.333	111	6.20073	6.36533	6.38425	6.23151	6.30097	6.64018	6.09673	6.22668	6.65059	6.38241	5.99764	5.82324	A	A	P	P	P	P	M	P	P	P	P	P	hsa_circRNA_100140	hsa_circ_0005674	exonic	chr1	-	32375638	32377427	uc001bty.2	PTP4A2	TTATAAGACAGATTGGCCATTTGATGATGGAGCTCCACCCCCTAAT
ASCRP000531	100.167	64.1667	43.8333	115.333	124.167	54.3333	168.833	175.667	70.3333	73.8333	151	221.833	6.84305	6.36151	5.47196	7.21196	7.38144	6.05939	6.29594	6.34011	5.58949	5.50323	6.8351	6.90007	P	A	A	P	P	A	P	P	A	A	P	P	hsa_circRNA_100141	hsa_circ_0007364	exonic	chr1	-	32381495	32385259	uc001btx.2	PTP4A2	TCCACGTTCTAGTTTTTCGTTGGAATATACGTTGCACATTTATGGC
ASCRP000535	5680	3377.17	1480.17	3167.5	3968.5	2722.5	7038.67	2906.67	1267.67	1115	2358	34872.2	12.751	12.7506	11.2027	12.3246	12.0419	11.7675	12.6264	10.9008	11.0955	10.8289	11.6305	13.2525	P	P	P	P	P	P	M	P	P	P	P	M	hsa_circRNA_100146	hsa_circ_0011385	exonic	chr1	+	32691771	32692131	uc001bur.4	EIF3I	TAGTGCCAAGGAAAGCAGCTGGCCCTTCTCAAGACCAATTCGGCTG
ASCRP000536	131.833	123.333	101.167	190.167	116	93.3333	1216.67	1822.33	117.5	152.167	248.167	577.667	7.41547	7.75056	7.06266	8.16615	7.26578	7.17725	9.1048	9.95319	6.99446	7.26321	7.84733	8.27727	P	P	P	P	P	P	P	P	P	P	P	P	hsa_circRNA_100147	hsa_circ_0004240	exonic	chr1	+	32694099	32694809	uc001bur.4	EIF3I	TTGAGGCCAGTCTGGAGAGGTGTTGGTGAATGTTAAGGAGCACTCC
ASCRP000538	59	52.5	61.6667	52.3333	59.3333	61.8333	145.333	121.167	86.6667	96.6667	101.5	120.667	5.84634	5.85971	6.19583	5.80842	6.04455	6.34987	6.12519	5.85537	6.27428	6.25698	5.96394	5.94595	A	A	A	P	A	A	P	P	P	P	A	P	hsa_circRNA_100149	hsa_circ_0002306	exonic	chr1	+	33058531	33060824	uc001bvk.3	ZBTB8B	AGTAGCCATTTTCGAACAAATGGAGATCTCCTCTCATCAGTCTCAC
ASCRP000539	90.3333	69	85.6667	86.5	85	73.6667	154.833	153	99.8333	119.833	143.5	131.167	6.68311	6.59114	6.79261	6.68026	6.65672	6.69076	6.20019	6.16054	6.61374	6.77648	6.74077	6.0858	P	A	P	P	P	P	P	P	P	P	P	P	hsa_circRNA_100150	hsa_circ_0011424	exonic	chr1	-	33093108	33100393	uc001bvp.3	ZBTB8OS	TTTCATTGTCCAAGCACCCTCAGATTTGGATCATACAGCAGATGTC
ASCRP000540	61.1667	58.8333	53.3333	60.3333	65.6667	58.8333	121.5	102.833	73	79.3333	89	92.3333	5.96232	6.22429	5.94078	6.10537	6.15613	6.23893	5.92301	5.64669	5.67118	5.77453	5.63067	5.51172	A	A	A	P	P	A	P	P	A	A	A	A	hsa_circRNA_100151	hsa_circ_0011426	exonic	chr1	-	33099245	33099673	uc001bvp.3	ZBTB8OS	CATACCCCGGGTTACACGCATGGGGAGATACTCTGGAGGAAGCATT
ASCRP000541	67.5	50.1667	46.1667	76.6667	72	51.8333	114.667	126.667	75	81.6667	113.5	121	6.08787	5.76847	5.61103	6.47596	6.32621	5.74299	5.86147	5.84969	5.74869	5.85938	6.25688	5.96854	A	A	A	P	P	A	P	M	A	A	P	M	hsa_circRNA_100152	hsa_circ_0007516	exonic	chr1	-	33099245	33100393	uc001bvp.3	ZBTB8OS	GATGAATTCTTCATACCCCGGATTTGGATCATACAGCAGATGTCCA
ASCRP000546	123.167	90.3333	111.333	96.1667	113	105.167	227.5	228.667	123.333	139.5	199.333	269.667	7.26178	7.08948	7.20104	6.85538	7.24582	7.39524	6.68066	6.71425	7.1206	7.06587	7.40674	7.2326	P	P	P	P	P	A	P	P	P	P	P	P	hsa_circRNA_100157	hsa_circ_0011462	exonic	chr1	-	33478807	33480195	uc001bwo.2	AK2	AAAGCCACATGCTGATTCACCCCAAGAGTGGCCGTTCCTACCACGA
ASCRP000547	67.6667	65.3333	61.8333	62	62	60.3333	157.167	210.333	90	97.3333	108.667	148.833	6.15174	6.41198	6.20111	6.10582	6.05087	6.28762	6.21482	6.5969	6.37001	6.30986	6.11011	6.2401	A	A	A	P	A	A	P	P	P	P	A	P	hsa_circRNA_100158	hsa_circ_0011493	exonic	chr1	-	34112247	34118061	uc001bxm.1	CSMD2	TGTGAGCAATGCTGGCTTCGTCATTGACTATACAGCTCCCTGCGGG
ASCRP000548	65.5	56.6667	63.3333	60	61	55	180.333	366.667	81.3333	95	104.5	142.667	6.0971	6.06773	6.22601	6.06009	6.11458	6.05092	6.38169	7.40561	6.03649	6.20481	6.06143	6.21109	A	A	A	P	A	A	P	P	A	A	A	P	hsa_circRNA_100159	hsa_circ_0011501	exonic	chr1	-	34254200	34276465	uc001bxm.1	CSMD2	TCAAGGCTTCTTATGAAGCCCGCATGTGTGATGCCCACCTTCGAGG
ASCRP000549	67.8333	119.667	79.3333	76.8333	61.3333	144.333	514.333	1318	120.667	102.5	129.5	578.5	6.15416	7.71462	6.68256	6.48791	6.05992	7.94708	7.7625	9.35122	7.0552	6.41578	6.55414	8.27703	A	P	M	A	A	P	P	P	P	P	P	P	hsa_circRNA_100160	hsa_circ_0011536	exonic	chr1	+	35824525	35827390	uc009vuu.3	ZMYM4	CAATGCTCAAGTGGTGGTATCATGGATACAGAAATGTCTGAAGATA
ASCRP000556	52.3333	49.6667	51.6667	48.3333	51.6667	46.8333	116.167	100.667	74.6667	85.8333	96.6667	104.333	5.63306	5.72086	5.85607	5.73507	5.66395	5.57407	5.88845	5.62397	5.73115	6.02317	5.86845	5.72558	A	A	A	A	A	A	P	P	A	P	P	A	hsa_circRNA_100167	hsa_circ_0011572	exonic	chr1	-	35940405	35944813	uc010ohw.2	KIAA0319L	TGTTCTCCAAGAACCACCTAAAGGTCCACAAGGCGATTACAATTTC
ASCRP000557	343	273.667	401	375.5	353.5	236.5	1069.33	526.333	397.833	431.167	385.667	488.333	9.01826	9.16592	9.15437	9.26469	9.01838	8.72991	8.87537	7.9639	9.063	9.07664	8.61295	8.04336	M	P	P	P	P	P	M	A	P	P	P	P	hsa_circRNA_100168	hsa_circ_0004660	exonic	chr1	-	35944566	35944813	uc010ohw.2	KIAA0319L	ACCTCAGCACCATACCCAGGTCCACAAGGCGATTACAATTTCCAGT
ASCRP000561	397.667	288.167	376.333	477.5	517.167	446.333	696.833	584.667	451.167	393.833	318.833	660.667	9.25188	9.24883	9.03905	9.64348	9.57268	9.50683	8.19818	8.1116	9.30622	8.92018	8.27192	8.43055	P	P	P	P	P	P	P	P	P	P	P	P	hsa_circRNA_100172	hsa_circ_0011615	exonic	chr1	+	36354027	36360003	uc001bzk.3	EIF2C1	TAATGTTACCCGTCGCCCTGCTAGCCATCAGACCTGCGGGCGCTTA
ASCRP000562	102.5	92.3333	74.3333	111.667	75.8333	74	674.667	875.167	87.6667	110.167	190.667	319.833	6.92968	7.17658	6.49808	7.15303	6.51097	6.68787	8.14203	8.71702	6.28074	6.58183	7.32943	7.45454	P	P	A	P	P	P	P	P	P	P	P	P	hsa_circRNA_100173	hsa_circ_0002828	exonic	chr1	+	36432555	36439112	uc001bzn.1	EIF2C3	AATATCGATGGGAGGTGGTTGACTCAATGGTTCAGCATTTTAAAGT
ASCRP000564	209.667	149	242.333	193.167	232.667	180.333	522.167	502	250.167	313.667	328.333	379.833	8.19585	8.13976	8.40559	8.17818	8.43473	8.30682	7.78655	7.90411	8.37257	8.49309	8.34295	7.70964	P	P	P	P	P	P	P	P	P	P	A	P	hsa_circRNA_100175	hsa_circ_0011636	exonic	chr1	+	36469941	36479649	uc001bzp.3	EIF2C3	AAATATTGAATTTCTGCCACTGCCTTCTACAAAGCACAACCTGTAA
ASCRP000565	63.1667	54	73	54.6667	63.8333	61.5	155.667	150	87	102	114.667	121.5	6.02989	5.91718	6.50824	5.89822	6.12163	6.29532	6.20528	6.12575	6.25228	6.40539	6.23517	5.92172	A	A	P	A	P	A	P	P	P	P	P	P	hsa_circRNA_100176	hsa_circ_0011685	exonic	chr1	+	36773370	36773564	uc010oia.1	SH3D21	ACTACCTGCAGACAGGCCTTGGTAACCCAGACATGCCTTCAGTCAG
ASCRP000566	8351.33	4562.17	5191.33	4257.67	8714.33	6900.33	5857.33	4066.67	3784	3065.67	4144.83	23883.7	13.246	13.0014	12.8956	12.6252	13.0503	12.8908	12.2506	11.6922	12.7813	12.449	12.4703	12.6771	P	P	P	P	P	P	M	P	P	P	P	P	hsa_circRNA_100177	hsa_circ_0011692	exonic	chr1	-	36823839	36824423	uc001cak.1	STK40	CCTCTTCCAGGTCCCCGTCTGGGCAACTCACCGGTGCCAAGCATAG
ASCRP000568	60	47	59	50.5	51.6667	53.3333	143.833	146.833	77.3333	91	104.333	112.167	5.92663	5.56557	6.1149	5.76937	5.67079	5.93159	6.11455	6.09175	5.89188	6.15335	6.07151	5.81877	A	A	A	A	A	A	P	P	A	P	M	P	hsa_circRNA_100179	hsa_circ_0011871	exonic	chr1	+	40434005	40434149	uc010ojb.1	MFSD2A	TCAGTCTGGAGTCCATGCTGCCTGATGTCATTGACGACTTCCATCT
ASCRP000569	74	60.1667	67.1667	74.6667	69	64.3333	141.667	149.833	91.5	101.333	129	145.833	6.32498	6.26878	6.35934	6.43186	6.31779	6.37875	6.09736	6.15175	6.43335	6.413	6.4803	6.22344	P	A	A	P	P	A	P	P	P	P	P	P	hsa_circRNA_100180	hsa_circ_0009142	exonic	chr1	+	40529898	40530231	uc009vvz.3	CAP1	ACAAAGATGTAATAAGCTTTCCGATTTGTTGGCACCCATCTCAGAG
ASCRP000570	68.5	58	70.6667	57.5	63.3333	81	182.667	151.333	92.6667	89.6667	96	210.833	6.16628	6.07817	6.46086	5.94716	6.18992	6.90447	6.39234	6.17099	6.45731	6.10061	5.90607	6.82481	P	A	P	P	A	P	P	P	P	P	A	P	hsa_circRNA_100181	hsa_circ_0011929	exonic	chr1	+	41463065	41466789	uc010ojq.2	CTPS1	GTAGTGCTCAATATGATCGCTTGCTGGAGACCTGCTCTATTGCCCT
ASCRP000573	145.667	115	136.5	176.667	130	104.833	212.167	198	128.833	143.833	182.667	204.833	7.58858	7.6286	7.55389	7.97338	7.46449	7.39613	6.59747	6.50667	7.20347	7.15486	7.21688	6.78376	A	P	P	P	P	P	P	P	P	P	M	P	hsa_circRNA_100184	hsa_circ_0000061	exonic	chr1	-	41536266	41541123	uc010ojs.1	SCMH1	CATGCAGGCCCCAACAGTTGTGATTCCAAAGAATCCCTATCCTGCC
ASCRP000574	94.1667	55.6667	66.3333	64.3333	61.3333	62	130.333	178.667	186.5	88.8333	110.167	165	6.79357	5.98784	6.37362	6.18393	6.09369	6.36478	5.98816	6.36148	7.85052	6.10622	6.18585	6.41718	P	A	A	P	A	A	P	P	P	P	P	P	hsa_circRNA_100185	hsa_circ_0004628	exonic	chr1	-	41578954	41582682	uc010ojs.1	SCMH1	GGCACCAAAGGATTTCGGCTGAATGCGTCTTCTTGGCCCATGTTCC
ASCRP000575	286.333	264.333	369	295.667	326.167	218.167	990.167	455.5	332.667	351.167	331.667	430	8.78342	9.10143	9.03029	8.88446	8.9108	8.59871	8.73385	7.74581	8.78265	8.7154	8.35512	7.86161	P	P	A	P	P	P	P	P	A	P	P	P	hsa_circRNA_100186	hsa_circ_0000063	exonic	chr1	-	41578954	41608784	uc010ojs.1	SCMH1	GGCACCAAAGTCCTACACACCTCCAAGCAACGAGTTCAAGATCAGT
ASCRP000577	71	69.3333	68	60.1667	78	60.6667	128.167	169	110.333	99.5	99.1667	158.833	6.24238	6.53617	6.39142	6.10597	6.53809	6.34966	5.97078	6.30225	6.82898	6.33994	5.93951	6.35547	P	A	A	P	P	A	P	P	P	P	P	P	hsa_circRNA_100188	hsa_circ_0011950	exonic	chr1	-	42041214	42050989	uc001cgy.3	HIVEP3	ATCAAAATCTTCGAAGGAGGAAGAAGAGCGTGATTTCTCCTCCAAG
ASCRP000578	118.667	124.5	172.167	115.167	139	101.5	324.333	240.333	136.5	155.167	157	222.167	7.19487	7.74199	7.84247	7.19574	7.56281	7.34075	7.12133	6.78684	7.3149	7.29741	6.89012	6.90531	P	P	P	P	P	P	P	P	P	P	M	P	hsa_circRNA_100189	hsa_circ_0011951	exonic	chr1	-	42094419	42094618	uc001cgz.4	HIVEP3	TTCAGCACAGGATTCGAGGCACAAACCCAGCAGCCTCAACCTAGTT
ASCRP000580	5264.67	3434	4017.17	4674.67	6147.83	4921.5	5946	6177.17	4069.5	3487.33	3659.83	15666.5	12.6452	12.7835	12.53	12.8495	12.5961	12.4977	12.3118	12.5993	12.8725	12.7472	12.431	12.0751	P	P	A	A	P	P	P	A	P	P	P	P	hsa_circRNA_100191	hsa_circ_0012077	exonic	chr1	+	44054401	44054671	uc001cjr.3	PTPRF	ACAGTGAAAGTGCGCCGCGTGGCTCCTCGTTTCTCCATCCCTCCCA
ASCRP000581	3461.33	2535.5	3241.83	4102.17	5814.33	4407.83	3505.83	3731.17	3376	2649.33	3506.33	16378.5	12.1448	12.3471	12.2347	12.7008	12.4987	12.3719	11.1224	11.5087	12.5806	12.3699	12.3689	12.1633	M	P	P	P	P	P	P	P	M	P	P	M	hsa_circRNA_100192	hsa_circ_0012107	exonic	chr1	+	44290402	44303983	uc001ckb.3	ST3GAL3	TATGCTTCAGCCTTGATGACGGCCATCTTCCCCCGCTCACCGAGGA
ASCRP000584	216.833	141.667	197.333	189	196.833	176.667	327	304.167	198.333	256.667	238.167	233.5	8.27146	8.03923	8.08107	8.14593	8.15539	8.27654	7.13728	7.11826	7.97005	8.15413	7.75605	7.01082	P	P	P	P	P	P	P	P	P	P	P	P	hsa_circRNA_100195	hsa_circ_0012144	exonic	chr1	-	44773981	44785416	uc010okw.2	ERI3	TAAAAGTCATGAAATCATCGAGTTCCCCATCCTAAAGCTAAATGGC
ASCRP000591	714.5	262.5	497	320	382.333	452	2713.33	1935.33	425.333	622.833	721.5	1385.67	10.0508	9.09455	9.37062	9.01556	9.1241	9.51959	10.4848	10.0565	9.19083	9.7039	9.6282	9.35842	P	P	P	P	P	P	P	M	P	P	P	P	hsa_circRNA_100202	hsa_circ_0012185	exonic	chr1	-	45340349	45341367	uc001cmt.2	EIF2B3	TGGAGGAAGGGTGCCCAAATTGCTGTCTGCTCTCTGTCCAGAAGAA
ASCRP000594	247.667	191.333	430.667	208	286.5	224	564.333	393.333	308.5	372.667	405.5	337	8.50967	8.55453	9.21982	8.31916	8.74108	8.63972	7.90054	7.51014	8.69346	8.82793	8.69116	7.53052	M	P	P	P	P	P	P	A	M	P	P	P	hsa_circRNA_100205	hsa_circ_0012265	exonic	chr1	-	46105881	46120991	uc001coq.3	GPBP1L1	TCCTTCCAAGTCACCTACTGCCACCTTCGAAAAACACGGAGAGCAC
ASCRP000596	796.667	661.833	616.5	536.667	394.667	462.667	1723.33	2625.33	494.333	620.333	561.167	1455	10.241	10.5883	9.60964	9.84659	9.18611	9.54955	9.73197	10.6767	9.44002	9.70185	9.24225	9.42841	M	P	P	P	P	P	P	P	P	P	P	P	hsa_circRNA_100207	hsa_circ_0012277	exonic	chr1	+	46290104	46295253	uc001cow.3	MAST2	TGCTGGCCTGGATGTAGTAACTGGAGTTAGTCCCCTGCTCTTCAGG
ASCRP000597	237.833	162.833	233.167	181.167	197.5	160.833	395.667	314.167	192.5	252.833	240.667	386.667	8.43274	8.27067	8.32739	8.0471	8.17398	8.10127	7.37772	7.15993	7.91061	8.13925	7.7826	7.70075	M	P	P	P	P	P	P	P	P	P	P	P	hsa_circRNA_100208	hsa_circ_0012283	exonic	chr1	+	46383010	46425149	uc009vya.3	MAST2	GGCCACACAGAATCTCTACCCTTTGCCGAGGAGCTGAAGTAAACCA
ASCRP000598	412.167	317.833	535.833	376.5	464.833	413.5	1080.5	1104.67	476.667	574.667	630.167	1325.33	9.31297	9.40511	9.45425	9.32552	9.41895	9.4081	8.88523	9.03211	9.3856	9.53464	9.45203	9.29458	P	P	P	P	P	P	P	P	A	A	P	P	hsa_circRNA_100209	hsa_circ_0012300	exonic	chr1	-	46521466	46546422	uc001cpb.4	PIK3R3	GAGATCAACACCTTGTCTCTTCCACCAAAGCCACCTAAGCCAATGA
ASCRP000599	99.6667	87.1667	123.833	94.3333	106.333	92.6667	214.5	201.167	133	172.833	166	154.5	6.85259	7.07576	7.40347	6.84131	7.07843	7.11863	6.59907	6.53263	7.26542	7.4958	7.047	6.29212	P	P	P	P	A	P	P	A	P	P	P	P	hsa_circRNA_100211	hsa_circ_0012350	exonic	chr1	-	47037734	47037839	uc001cqd.2	MKNK1	CATACCAAAGGTTCCATCTTAGCCCACATCCAGAAGCAAAAGCACT
ASCRP000601	2307	1435.83	1227.33	1693.67	2424	1499.33	2995.83	3653.33	1168	1148	1762.33	13360	11.6012	11.6465	10.8793	11.5106	11.4658	11.1162	10.691	11.4526	10.9229	10.8823	11.1866	11.8851	M	P	P	A	M	M	P	P	P	P	P	A	hsa_circRNA_100213	hsa_circ_0000069	exonic	chr1	-	47745912	47748131	uc010omn.1	STIL	ACTACTTCAGGCACAGGTCTTCCCAAAAGTTATCTTCTGGGAAGAT
ASCRP000605	53.5	42.6667	48.1667	46.1667	47.6667	46.5	302.167	93.1667	135.167	113.167	140.667	141	5.65054	5.35958	5.72904	5.64412	5.58489	5.51183	6.98881	5.524	7.30561	6.62456	6.68449	6.16908	A	A	A	A	A	A	P	A	P	P	P	P	hsa_circRNA_100217	hsa_circ_0008197	exonic	chr1	-	51032748	51061888	uc001cse.1	FAF1	ATCTGACAAAGGACTCCAACAGAGCAAGATGTGTCTTGCTGAATCA
ASCRP000606	72.3333	63.6667	51.3333	50.8333	92	63.6667	99.5	111.5	88	86.5	115	120.667	6.26677	6.32637	5.84733	5.74957	6.75432	6.37531	5.70914	5.76466	6.26617	5.99583	6.28755	5.94254	P	A	A	A	A	A	P	P	P	A	P	P	hsa_circRNA_100218	hsa_circ_0012406	exonic	chr1	-	51121113	51171563	uc001cse.1	FAF1	AGACGACTCATGCCCTGCAGGAGTCATTAAATCAAAACTTCATGCT
ASCRP000607	106.667	109.333	103.333	88	193.167	170.333	151.5	160.167	117.667	124.5	184.667	216	6.9971	7.47924	7.07925	6.68813	8.02936	8.19045	6.17401	6.2131	6.9891	6.84175	7.26089	6.84944	P	P	P	M	A	A	P	P	P	P	P	P	hsa_circRNA_100219	hsa_circ_0004619	exonic	chr1	-	51121113	51210447	uc001cse.1	FAF1	CAGACGACTCAGAGAGATTAAACAGATTCTAGAAAATGAACTTCAG
ASCRP000610	376.667	261.5	510.667	339.5	399.667	352.333	872.5	873.667	440	611.667	587.333	698.667	9.15661	9.07797	9.39889	9.12259	9.19911	9.23835	8.55082	8.71561	9.27187	9.65099	9.32783	8.49969	P	P	P	P	P	A	P	P	P	P	M	P	hsa_circRNA_100222	hsa_circ_0012415	exonic	chr1	-	51826842	51831701	uc001csp.3	EPS15	TTGCCAACTTCAGTGCTCCACAGACCCCTTTGCTTCTGTTTTTGGG
ASCRP000611	15564	9277	11042	11203.3	19254.7	14746.3	9128.5	9471.83	7355.5	6592.5	11143.3	58443.8	14.1307	14.0289	13.9566	14.1202	14.1034	13.8819	13.0447	13.1999	13.7504	13.9736	14.0045	13.9675	P	P	P	P	M	P	P	P	P	P	P	M	hsa_circRNA_100223	hsa_circ_0012417	exonic	chr1	-	51829537	51831701	uc001csp.3	EPS15	CTGCCCTCTACCACCTGCCACAGACCCCTTTGCTTCTGTTTTTGGG
ASCRP000614	111.667	66.3333	99	93.3333	101.5	83.3333	414.667	260.333	127.667	144.667	178.833	230.667	7.08922	6.45097	6.9989	6.80545	7.01699	6.94868	7.45839	6.88544	7.18009	7.15923	7.18767	6.97073	A	A	P	P	P	P	P	P	P	P	P	P	hsa_circRNA_100226	hsa_circ_0005567	exonic	chr1	-	51868106	51874004	uc001csp.3	EPS15	TTTTGTTGGCAATCTCTTCTCTGAAAGCTGAATTAACTAGTCAGGA
ASCRP000615	220.333	114.667	234.167	151	216.5	180.833	742.333	429.5	223.333	286.5	313.333	510.167	8.28888	7.63076	8.35931	7.6858	8.31872	8.32807	8.29732	7.64135	8.18334	8.33011	8.24123	8.10658	P	P	P	P	P	P	P	P	P	M	P	P	hsa_circRNA_100227	hsa_circ_0004877	exonic	chr1	-	51871576	51874004	uc001csp.3	EPS15	AGGAATCTCCAATCTCTTCTCTGAAAGCTGAATTAACTAGTCAGGA
ASCRP000616	52.5	50.5	49.3333	48	53.6667	48.8333	128.833	129.5	74.3333	84.6667	95.1667	110.667	5.65891	5.68631	5.73383	5.6825	5.76449	5.6287	5.97825	5.934	5.82606	5.86906	5.87617	5.78084	A	A	A	A	A	A	P	P	A	M	A	P	hsa_circRNA_100228	hsa_circ_0007330	exonic	chr1	-	51926762	51930998	uc001csq.1	EPS15	GTTTGCAGTTCATGATACCAGTAGTCCTTTGCTAATCAGTGGAACC
ASCRP000617	103.167	76.3333	132.667	104.5	112.833	91.8333	319.667	321	137.667	194.5	197.167	203	6.89709	6.76676	7.49367	7.02689	7.20546	7.09471	7.11076	7.18549	7.32883	7.71658	7.40412	6.7571	P	P	P	P	P	P	P	M	A	P	M	P	hsa_circRNA_100229	hsa_circ_0002039	exonic	chr1	+	52237741	52238395	uc001css.3	OSBPL9	AATGGATCTTACTAAGTTCTTCTGGATCTGCCTCAGTCCTGACACA
ASCRP000618	91	97	62.3333	146.333	89.5	66	623.5	1703.33	95.5	116	181.5	444.333	6.72681	7.27292	6.1845	7.63804	6.78943	6.44826	8.03099	9.8325	6.50704	6.70287	7.22013	7.90879	P	P	A	P	P	P	P	P	P	P	P	A	hsa_circRNA_100230	hsa_circ_0009076	exonic	chr1	-	52293467	52299842	uc001ctf.2	NRD1	GTTGATAGTGTGGTATTCATGGGTAGTTTGAAATATCCAGATGAGA
ASCRP000624	19630.7	11575	16726.3	13827.3	30240.8	22416.3	30547	15188	10455	8359.33	15000.2	63687.7	14.4573	14.2855	14.4651	14.3676	14.6517	14.5099	14.771	13.9073	14.2375	14.4251	14.3954	14.0812	P	P	P	P	P	P	P	M	P	P	P	P	hsa_circRNA_100236	hsa_circ_0012634	exonic	chr1	-	54506428	54509198	uc001cwq.3	TMEM59	TTTTAAGATGCCTCTCTCTCTTATGTCCCTGATGCCAAAAATGCAC
ASCRP000625	90.1667	69.3333	71.6667	86	84.6667	66.8333	143.5	148.667	106.167	132.167	131	155.667	6.69601	6.49822	6.46711	6.68326	6.62716	6.51805	6.11273	6.12696	6.74161	6.96933	6.56573	6.31485	P	P	P	P	P	A	A	P	P	P	P	P	hsa_circRNA_100237	hsa_circ_0012650	exonic	chr1	-	54717288	54717533	uc001cxe.3	SSBP3	CGGCCCACAGCCTCCGGGAGGAGTTCCTGGGACACAGCCATTGCTG
ASCRP000626	116.833	112	125.333	112	105.5	87.8333	168.5	167.667	107.833	134.833	144.833	175	7.18455	7.58216	7.41285	7.149	7.06821	6.99759	6.2952	6.29704	6.81383	6.99768	6.77188	6.4943	P	P	P	P	P	P	P	P	P	P	P	P	hsa_circRNA_100238	hsa_circ_0012651	exonic	chr1	-	54717288	54722859	uc001cxe.3	SSBP3	CGGCCCACAGCCTTTTATGTCACCGCGATACGCAGGCGGCCCCAGG
ASCRP000627	124.333	74.5	70.1667	90.3333	85.5	72.5	319	379.5	90.6667	101.5	128.333	204	7.30329	6.70326	6.42577	6.76615	6.72618	6.70281	7.10908	7.45348	6.37793	6.43426	6.5195	6.78209	P	A	A	P	P	P	P	P	P	P	P	P	hsa_circRNA_100239	hsa_circ_0012673	exonic	chr1	-	55340765	55341720	uc001cyc.1	DHCR24	TGTGCGATGCACTCCGATTGTCCGTGTGGAGCCCTTGGTGACCATG
ASCRP000629	66.8333	50	47.3333	84.6667	73.5	48	98	143	70	76.1667	107.167	151	6.15223	5.75444	5.66936	6.6512	6.42587	5.64774	5.69102	6.06978	5.51718	5.58319	6.08078	6.27967	A	A	A	P	P	A	P	P	A	A	P	P	hsa_circRNA_100241	hsa_circ_0000072	exonic	chr1	-	58971731	59002413	uc001cyx.1	OMA1	TGAGTACTTGGATAGACTTATACCTCAGGGGCATAAGGAAATGGTG
ASCRP000631	63.3333	54.6667	55.3333	78.5	71.1667	52	114.5	144.833	74	77.6667	105.667	143.167	5.98056	5.97992	5.95533	6.53719	6.35306	5.83213	5.85042	6.08531	5.73194	5.7642	6.05224	6.18333	A	A	A	P	P	A	P	P	A	A	A	P	hsa_circRNA_100243	hsa_circ_0000073	exonic	chr1	-	58992932	59002413	uc001cyx.1	OMA1	ACAAAATTGGACTACTGCTTGCTGCAAAGGGGCATAAGGAAATGGT
ASCRP000632	73.3333	63.6667	52.1667	79.1667	76	63.1667	163.667	212	74.6667	76.6667	97.1667	222.667	6.30785	6.40403	5.90538	6.56868	6.48568	6.29592	6.24721	6.60689	5.86666	5.60152	5.90573	6.91131	P	A	A	P	P	A	M	A	A	A	A	P	hsa_circRNA_100244	hsa_circ_0000075	exonic	chr1	+	59787207	59812070	uc001czg.2	FGGY	ACTTCTGTGGCTGAAAGAGGTGGAGGAACTGCAATGTCTGGTGGAG
ASCRP000633	79.5	71.3333	67.5	87.8333	86	64	128.5	166.667	77.6667	84.3333	103.833	202.167	6.4811	6.62277	6.39234	6.70379	6.70443	6.40686	5.98841	6.27515	5.90041	5.99369	6.03592	6.76062	P	A	A	P	P	A	P	P	A	A	A	P	hsa_circRNA_100245	hsa_circ_0005354	exonic	chr1	+	59787207	59844509	uc001czg.2	FGGY	AAGGCAACAGGTGTCACAGCACGGTGGAGGAACTGCAATGTCTGGT
ASCRP000634	61.5	54.6667	48.6667	65	66.6667	49.6667	102.667	148.833	79	75.3333	100	200.667	5.96448	6.02393	5.62626	6.19588	6.23278	5.79588	5.73932	6.14564	5.95501	5.61	5.89484	6.73478	A	A	A	P	P	A	P	P	A	A	A	P	hsa_circRNA_100246	hsa_circ_0006633	exonic	chr1	+	59805629	59844509	uc001czh.2	FGGY	TCACAGCACGAAAGTTGTACAAGGGATTGATTTAAACCAAATTCGA
ASCRP000636	111.167	88	97	90.1667	119.333	79	133	148	95.3333	113.667	133	192.667	7.12971	7.08628	6.9745	6.78156	7.29033	6.87878	6.02573	6.12379	6.55578	6.67208	6.61982	6.66449	P	P	P	P	P	P	M	P	P	A	P	P	hsa_circRNA_100248	hsa_circ_0008657	exonic	chr1	+	62907158	62908990	uc001daj.2	USP1	ACACACTGAGTGATCAAGTTGTTCCTGCAGCACAGTCTTCACCTAT
ASCRP000638	79.1667	54.8333	66.5	64.5	75.6667	49	129	164.167	99	107.333	127.333	105.833	6.42495	5.94362	6.33512	6.16333	6.45971	5.84785	5.98539	6.2652	6.64108	6.43947	6.48141	5.71488	P	A	A	P	P	A	P	P	M	M	P	P	hsa_circRNA_100250	hsa_circ_0000081	exonic	chr1	+	64474976	64516388	uc001dbi.4	ROR1	AAGTCCAGGATACTCAAACAGAGCTGTCAGTCAGTGCTGAATTAGT
ASCRP000639	122.167	127.833	167.833	136.667	163.833	113.833	505.333	399.667	161	189.5	204.333	227	7.27938	7.80574	7.83597	7.50935	7.84682	7.56872	7.73965	7.53283	7.57201	7.66735	7.42466	6.94113	M	P	P	P	P	P	A	P	A	P	P	P	hsa_circRNA_100251	hsa_circ_0000082	exonic	chr1	+	64515362	64516388	uc001dbi.4	ROR1	CAGGATACTCATTCTTACCTGACCCTCGATGAACCAATGAATAACA
ASCRP000640	67.3333	55.8333	61.1667	59.1667	64.6667	60	116.833	142.5	88	84.6667	104.667	148.167	6.09541	5.99246	6.18201	6.06608	6.16431	6.21714	5.88527	6.05605	6.29868	5.96737	6.04318	6.22659	A	A	A	P	A	A	P	P	M	P	P	A	hsa_circRNA_100252	hsa_circ_0007009	exonic	chr1	+	65131739	65141666	uc010opa.1	CACHD1	CAGAGAACCGGTATCTCCATGCAGTAGCTAATCCAGGGTTGATTTC
ASCRP000641	99.8333	88.5	112.667	79.6667	100.167	88.8333	184.5	169.833	104	124	128.833	160.167	6.85614	7.0472	7.22525	6.53039	6.9945	7.09742	6.41146	6.29039	6.72442	6.82007	6.54835	6.35358	P	P	P	P	P	P	P	P	P	P	P	P	hsa_circRNA_100253	hsa_circ_0012850	exonic	chr1	+	65139030	65141244	uc010opa.1	CACHD1	TCAACTGTCACCGGAGCCCCTGGTAGCAAATGATATCCTCAACCAC
ASCRP000643	61.1667	48.5	56	52.5	58.3333	50	103	124.833	82	86.5	98	104.167	5.9306	5.63707	6.03002	5.83551	5.98448	5.85099	5.75771	5.85673	6.14319	5.93302	5.91235	5.74161	A	A	A	P	A	A	P	M	A	P	A	P	hsa_circRNA_100255	hsa_circ_0012859	exonic	chr1	+	65268658	65280523	uc001dbt.2	RAVER2	TTATTCTCCACCTTTTGGTGATTATGCACAGCCGTTCTTGGAACAC
ASCRP000645	488.333	397	530.667	413	503	362	789.667	1084.83	595.167	581.5	564.833	1237.67	9.52484	9.75137	9.44528	9.45388	9.54022	9.27322	8.39761	9.01003	9.75315	9.54773	9.26681	9.22399	P	P	P	P	P	P	A	P	P	P	P	P	hsa_circRNA_100257	hsa_circ_0002454	exonic	chr1	+	65830317	65831879	uc001dcc.1	DNAJC6	ATCGAACTGCCAAGTTTCACAGCCGGGTGCCTCATCTCCAGACATG
ASCRP000647	75.6667	80	93.1667	113.5	93.8333	69	244.333	153.333	91.1667	107.167	129.667	127	6.39671	6.89232	6.89962	7.18934	6.873	6.58192	6.78281	6.16321	6.39741	6.5253	6.5646	6.00579	P	P	A	P	P	P	P	P	P	P	P	P	hsa_circRNA_100259	hsa_circ_0006677	exonic	chr1	-	67356836	67371058	uc001dcx.3	WDR78	AGTTTCACAGGAACAATGCCACACAACCAAAGAAGTCTATTAGCTT
ASCRP000650	142.667	101	114.667	98.6667	118	88.6667	804.333	362.5	143.5	179.333	169	291.833	7.58164	7.35864	7.27957	6.91524	7.2737	7.07716	8.42122	7.39164	7.37969	7.57247	7.09825	7.34717	P	P	P	P	P	P	P	P	P	P	P	P	hsa_circRNA_100262	hsa_circ_0012967	exonic	chr1	+	76253181	76255041	uc001dgy.1	RABGGTB	TGCTGTCCAGGGCACTCCACAGAAGGATGTTATTATCAAGTCAGAT
ASCRP000654	50.1667	43.1667	72.3333	48.5	48.1667	47.8333	89.6667	110.333	88.6667	76.3333	108.333	93	5.5698	5.4167	6.5053	5.69566	5.54101	5.63545	5.58021	5.7472	6.31403	5.67474	6.15844	5.53434	A	A	P	A	A	A	P	P	P	A	P	A	hsa_circRNA_100266	hsa_circ_0000087	exonic	chr1	-	78183551	78191447	uc001dhv.3	USP33	ACTGCAAGTAAATATATCACTGATGTCCATTCGAATGACCTGTCTA
ASCRP000655	59.3333	48.6667	41.3333	71.3333	68.6667	45.6667	977.833	175.5	389	326	383.5	506.333	5.85065	5.6242	5.37525	6.31282	6.29019	5.57136	8.71749	6.33442	9.03882	8.55254	8.61256	8.09798	A	A	A	M	P	A	P	P	P	P	P	P	hsa_circRNA_100267	hsa_circ_0002570	exonic	chr1	+	78267015	78280916	uc001dhx.3	FAM73A	CTTGCTGATGATATTGATCAAATTTTCTCCGGTGGCTAAAAAGTTG
ASCRP000657	1231.33	1007.17	920	947	4924.83	3063	415.167	315.167	359.333	257.5	796.167	14104.7	10.7548	11.0799	10.2864	10.7374	12.2376	11.8857	7.45417	7.17351	8.89901	8.1634	9.79602	11.9599	P	A	P	P	P	P	P	P	P	P	P	M	hsa_circRNA_100269	hsa_circ_0013048	exonic	chr1	+	82302569	82372915	uc001dis.3	LPHN2	CCCCGATGCCTTCAAAATTATGACTCAAAGATATGAAGATCAATGA
ASCRP000658	102.333	81	106.167	83.8333	105.667	84.8333	178.667	229	132.667	145.333	145.333	245	6.93551	6.86018	7.12003	6.63802	7.07819	6.95442	6.37922	6.71361	7.26584	7.16066	6.7742	7.08025	P	P	P	P	P	P	P	P	P	P	P	P	hsa_circRNA_100270	hsa_circ_0013062	exonic	chr1	-	85403437	85418213	uc001dkm.3	MCOLN2	CCATGACAAGATTGTGTTCAATTAGACCTTCAGGACCTCTCCAAGA
ASCRP000659	97.1667	94.3333	108	119.333	113	81.5	343	212.167	131.5	129.167	139	165.833	6.83774	7.1879	7.17362	7.28312	7.24062	6.96129	7.1938	6.597	7.22572	6.9154	6.6929	6.41934	P	P	P	P	P	P	P	P	P	P	P	P	hsa_circRNA_100271	hsa_circ_0002008	exonic	chr1	+	89236034	89237562	uc010osp.2	PKN2	TATAGTACACTATCCAAACCAGCAGCACTAACAGGATCGGAAACTC
ASCRP000660	149.667	130.333	1311.67	138.667	218.333	265	1209.67	634.333	386.5	270.167	518.333	271.167	7.64265	7.85263	10.987	7.5683	8.31035	8.90642	9.10336	8.23317	9.01609	8.25339	9.11508	7.23713	P	P	P	P	P	P	P	P	P	P	P	P	hsa_circRNA_100272	hsa_circ_0004463	exonic	chr1	+	92798947	92811471	uc009wdh.2	RPAP2	GTTGCTGTCATTCATGATTCCACCTTTCCACTGATAGACTCAAGTT
ASCRP000661	134.833	110.667	733.833	121.667	172	187	830	479.5	283.333	226.667	424.5	224.667	7.45535	7.53628	9.87021	7.32455	7.92319	8.37189	8.47496	7.82694	8.55841	7.95681	8.76725	6.93828	P	P	P	A	P	P	P	P	P	P	P	P	hsa_circRNA_100273	hsa_circ_0000091	exonic	chr1	+	92798947	92846430	uc009wdh.2	RPAP2	TTTACCAGAGTGCATGATTCCACCTTTCCACTGATAGACTCAAGTT
ASCRP000662	60.6667	53.3333	46	67.3333	63.3333	51	110.333	107.667	80.8333	86	105.333	100.833	5.87516	5.88361	5.61823	6.21244	6.09341	5.84148	5.8115	5.67934	6.04366	5.94334	6.03796	5.65008	A	A	A	P	P	A	P	P	A	P	P	A	hsa_circRNA_100274	hsa_circ_0005371	exonic	chr1	-	93070863	93073284	uc001doy.1	EVI5	TGAAATCCAGAACCAGATCAATAGTAACCATCTTCGAAGAGCAGAA
ASCRP000666	93.8333	72.5	67.3333	72.5	66.6667	63.6667	308.333	153.833	95.5	120.5	132.5	161	6.73394	6.63566	6.33551	6.36129	6.25173	6.34251	7.0666	6.16105	6.52354	6.78372	6.61496	6.35	P	P	A	P	P	A	P	P	P	P	P	P	hsa_circRNA_100278	hsa_circ_0013181	exonic	chr1	+	93300335	93303190	uc001dpa.3	RPL5	AACTCCAGACATGATTGCTTATGCCCGTATAGAGGGGGATATGATA
ASCRP000667	57	46.6667	55	48	53.3333	51.3333	106	134.667	78.6667	88.1667	103.667	131.333	5.83877	5.62443	6.00615	5.64631	5.80102	5.73395	5.80372	5.99975	6.00603	6.07597	6.03005	6.06411	A	A	A	A	A	A	P	P	A	P	P	P	hsa_circRNA_100279	hsa_circ_0003069	exonic	chr1	+	93301746	93303190	uc001dpb.3	RPL5	TCCAGACATGCTTCTCAATAGGTTTGGCATGGACAAGATCTATGAA
ASCRP000668	66.8333	55.6667	59	66.8333	60.8333	56.6667	139.333	117	87.6667	89.1667	112.667	117.5	6.11141	5.95131	6.1035	6.23245	6.02972	6.06411	6.0754	5.7958	6.33685	6.07128	6.21502	5.88246	A	A	A	P	A	A	P	P	P	P	P	P	hsa_circRNA_100280	hsa_circ_0013204	exonic	chr1	-	93790191	93791452	uc021opy.1	LOC100131564	GAGACAAACAACATACAAATAACTGATACCGTGCTTCCAGAAGATT
ASCRP000671	66.8333	59.6667	54.3333	53	69.3333	64	155	126.667	101.167	92.1667	129.167	144.5	6.1103	6.24215	5.98449	5.92278	6.36045	6.41768	6.19435	5.90136	6.64317	6.20191	6.52883	6.19832	A	A	A	A	P	P	P	A	P	P	P	P	hsa_circRNA_100283	hsa_circ_0013222	exonic	chr1	-	94360169	94363454	uc001dqg.1	GCLM	GCTGTTGACTCACAATGATCCAAAAGCAAAACTGTTCATTGTAGAA
ASCRP000678	73.6667	77.5	113.667	58	82.6667	75.5	218.5	287	141.5	139.333	189.833	145	6.32938	6.76697	7.24424	5.95811	6.6166	6.77062	6.63098	7.03024	7.40275	7.08589	7.32117	6.22746	M	P	P	P	P	P	P	P	P	P	P	P	hsa_circRNA_100290	hsa_circ_0013339	exonic	chr1	+	101372407	101379362	uc001dtn.2	SLC30A7	GACACTTTCATTCTCATGCTTAGGCTTGATTTCCGACTCTTTTCAC
ASCRP000680	82	63.8333	101.667	79.1667	86.1667	79	152.833	171.167	110.667	153	143.333	163.167	6.50466	6.37275	7.04114	6.57798	6.70786	6.85668	6.18427	6.32897	6.84833	7.27629	6.75564	6.39076	P	A	P	P	P	P	P	P	P	P	P	P	hsa_circRNA_100292	hsa_circ_0013353	exonic	chr1	+	101379218	101387397	uc001dtn.2	SLC30A7	TTATAGTTGTAAGGCCACGGACACAGTCATTCCCTCTTTAATGGTG
ASCRP000683	55.3333	56.3333	55.3333	50.3333	55	54	153.333	183.667	77.3333	83.6667	101.333	121.167	5.74343	6.0392	6.00205	5.7841	5.77958	5.99898	6.18762	6.40204	5.82451	5.98773	5.98791	5.96256	A	A	A	A	A	A	P	P	A	P	P	P	hsa_circRNA_100296	hsa_circ_0000105	exonic	chr1	+	111434013	111435155	uc001dzw.3	CD53	AAGGAAAACAAGTGTCTGCTTATGTCGGGCAAGAATATCACGGCAT
ASCRP000685	69	51.3333	52.1667	72.3333	69.5	56.6667	150	144.667	79	87.3333	127.167	242.333	6.16899	5.7901	5.80088	6.38094	6.33502	6.05501	6.16081	6.08652	5.96328	5.97682	6.43462	7.05131	A	A	A	P	P	A	P	P	A	P	P	A	hsa_circRNA_100298	hsa_circ_0000109	exonic	chr1	+	113196219	113202401	uc001ecj.1	CAPZA1	GTGCTTAAGATTCAGTGCATTTGCCCAGTATAACATGGATCAGTTC
ASCRP000686	61.8333	46.1667	53.5	61.6667	63.1667	53.1667	118.5	121	71.5	82	109.333	161	5.99256	5.5993	5.8803	6.12245	6.13095	5.90566	5.9029	5.84897	5.69949	5.89191	6.15322	6.35879	A	A	A	P	A	A	P	P	A	A	P	P	hsa_circRNA_100299	hsa_circ_0005664	exonic	chr1	+	113196219	113209767	uc001ecj.1	CAPZA1	TCACTAACTGTTTCGTGCATTTGCCCAGTATAACATGGATCAGTTC
ASCRP000687	62.8333	57.3333	71.6667	55.6667	64.6667	58.5	180.333	190.667	87.6667	123.333	127.333	127	6.02803	6.13529	6.43979	5.97812	6.10964	6.19322	6.39829	6.47062	6.33211	6.74735	6.49232	6.002	A	A	A	A	M	A	P	P	P	M	P	P	hsa_circRNA_100300	hsa_circ_0013561	exonic	chr1	-	113459799	113460666	uc001ecx.3	SLC16A1	CCACTTTTAGGTCTTGGGCTTGCCTTCAACTTGAATCCAGCTCTGA
ASCRP000689	145.667	143	104.667	146.833	139.5	110.333	684.5	1333.67	112.667	139.667	212	431	7.58139	8.05712	7.09748	7.65959	7.59178	7.4634	8.16835	9.37267	6.9198	7.06586	7.5341	7.86732	P	P	P	P	P	P	P	P	P	P	P	A	hsa_circRNA_100302	hsa_circ_0013587	exonic	chr1	+	113661854	113662145	uc009wgn.1	LRIG2	ATGAGCGGTGGTGGCACTGGTACCCGGGTGATTTGCTCAGATTGTT
ASCRP000690	60	51.3333	66.1667	53	57	54	130.833	120	85.8333	103.167	103.833	105.667	5.90188	5.73972	6.31047	5.85265	5.90444	5.88734	5.99958	5.84844	6.20672	6.41652	6.05422	5.7245	A	A	A	A	A	A	P	A	P	P	P	A	hsa_circRNA_100303	hsa_circ_0006583	exonic	chr1	+	114214355	114216087	uc001edj.3	MAGI3	ATGGCAGAATTCATAGCATCATGGTCCACCATCAGGAACAAACTCA
ASCRP000693	61.6667	57	84.3333	55	61.8333	63.6667	142.833	116.667	91.5	98.1667	100.5	103	5.98363	6.01236	6.75069	5.89855	6.07468	6.37659	6.09798	5.79977	6.42523	6.31418	5.99207	5.69124	A	A	P	A	A	A	P	P	P	P	A	A	hsa_circRNA_100306	hsa_circ_0013615	exonic	chr1	+	114450630	114450813	uc001eei.3	DCLRE1B	ATAAAGATTGGTGATTTTCGATACACACCATCCATGCTAAAGGAGC
ASCRP000695	123	79.3333	88.3333	94.6667	90.1667	87.6667	360.5	431.333	119.833	141.833	159.833	198.333	7.28057	6.79339	6.80247	6.84793	6.79876	7.0513	7.25378	7.64552	7.01994	7.1132	6.94893	6.73356	P	P	P	P	P	P	P	P	P	P	P	P	hsa_circRNA_100308	hsa_circ_0013626	exonic	chr1	-	114680116	114682502	uc001eev.3	SYT6	AATATGCCACAAGTCTGTGCTGGATGCCCTGGAGGAACAAGGAGGC
ASCRP000700	74.8333	63.5	52.8333	130.333	88.5	59.5	140.167	153.167	75.5	81.8333	132.667	155	6.35986	6.32745	5.77494	7.42338	6.74187	6.17756	6.07027	6.16647	5.70647	5.80544	6.60793	6.29197	P	A	A	P	M	A	P	P	A	A	P	M	hsa_circRNA_100313	hsa_circ_0013737	exonic	chr1	+	117957334	117963271	uc009whg.1	MAN1A2	TATCAGGAGAGGAGGAAGTTCACAAATGGGTGCTACCATAGTAGAT
ASCRP000705	74.5	52.5	47.6667	81.8333	82.6667	58.1667	120.833	137.167	85	92.6667	113.167	225.167	6.35488	5.8543	5.67884	6.58718	6.63734	6.1772	5.91255	5.99861	6.19712	6.18939	6.22388	6.94165	P	A	A	P	A	A	P	P	P	P	P	P	hsa_circRNA_100318	hsa_circ_0003693	exonic	chr1	-	145594038	145595220	uc001eog.3	POLR3C	TGAAACGTAATGTCAACAAGAAATTCCCAAAACACCAGACCATGCC
ASCRP000706	80.1667	59	609.833	60.1667	96.8333	94.5	316.5	182.333	198.667	104.333	178.333	162.333	6.4426	6.16109	9.59781	6.06472	6.91988	7.20452	7.09109	6.39377	7.96258	6.43415	7.18354	6.38317	P	A	P	P	P	P	M	P	P	P	P	P	hsa_circRNA_100319	hsa_circ_0013912	exonic	chr1	-	145601529	145601852	uc001eog.3	POLR3C	ATTGTCTTCCAATGAGCCCATTCCAGATGATGGGATTTATTGGCAG
ASCRP000708	60.5	55.6667	58.6667	53.3333	58	51.3333	163.5	115	82.6667	86.8333	97.8333	109	5.91565	6.05463	6.10884	5.85141	5.9411	5.86275	6.27403	5.80229	6.10678	6.03609	5.90753	5.74112	A	A	A	A	A	A	P	P	A	P	A	P	hsa_circRNA_100322	hsa_circ_0004220	exonic	chr1	+	146724277	146731572	uc001epm.4	CHD1L	CTTGTCAGAGGGATTCACCTACGCTCTTACCAGCTGGAGGGAGTAA
ASCRP000709	97.1667	90.3333	118.167	99.3333	94.5	123.5	191.167	201.333	139.833	150	142.833	173	6.80561	7.12577	7.32366	6.92316	6.88066	7.69762	6.46764	6.50761	7.36008	7.25547	6.73925	6.51128	P	P	P	P	P	P	P	A	A	A	P	P	hsa_circRNA_100323	hsa_circ_0013958	exonic	chr1	-	147131074	147131890	uc001epr.2	ACP6	CAGAAAGAAGGTAGAGTGGAACCCCCAGCTATTAGAGGTCCCACCC
ASCRP000712	78.1667	62.1667	77.8333	60.6667	64.3333	64.5	205.667	168.167	87.1667	104.833	114.833	124.167	6.41735	6.24953	6.56783	6.0626	6.11021	6.36348	6.54767	6.25465	6.21035	6.48412	6.253	5.99534	P	A	P	P	A	A	P	M	P	P	P	P	hsa_circRNA_100327	hsa_circ_0014022	exonic	chr1	+	150464886	150470223	uc001euq.3	TARS2	ATGAACTGCCCTGCACACTGGTGTGGCACATTGGTTGACCTTTGCC
ASCRP000713	59	52.5	53.8333	51.5	53.1667	55.1667	196	237.333	75.6667	88	102.667	149	5.88113	5.8767	5.89611	5.82369	5.76323	5.98024	6.48871	6.75753	5.80445	6.06656	5.98334	6.22796	A	A	A	P	A	A	P	P	A	P	P	P	hsa_circRNA_100328	hsa_circ_0014063	exonic	chr1	+	150921597	150922001	uc001evu.2	SETDB1	AGACATATAGGTGCTGTGAGGAGCAAAGGCCCTGTTGTCCAGTACA
ASCRP000714	243	151.833	266.333	195.167	196.5	177.667	769.333	814	225.667	294.5	347.5	459.667	8.48569	8.1833	8.55243	8.20712	8.13581	8.28168	8.3551	8.60749	8.17786	8.37509	8.43463	7.94604	A	P	P	P	P	P	P	P	P	P	P	P	hsa_circRNA_100329	hsa_circ_0006352	exonic	chr1	+	150923840	150935195	uc001evu.2	SETDB1	CAACCCTGATGTCCAAGTGTGCCTGCCATCAACTAACTATCCAGGC
ASCRP000715	73.6667	82.3333	82	70.6667	73	63.3333	170.167	112	93.5	91.6667	102.5	130	6.31483	6.92438	6.69018	6.31961	6.46023	6.33353	6.31496	5.7405	6.46535	6.1669	5.9854	6.06389	P	P	P	P	P	A	P	P	P	P	A	P	hsa_circRNA_100330	hsa_circ_0014088	exonic	chr1	+	150999708	151001420	uc010pco.1	PRUNE	CCAAACAACGGACTGACCACTGAGCAGATGCTGAGAAAAGACCAGA
ASCRP000716	77.8333	69	90.5	63.6667	72.1667	74.6667	167.167	115.667	98	100.333	108.833	124.333	6.4016	6.5383	6.87375	6.10085	6.43046	6.73837	6.29368	5.80372	6.62551	6.35633	6.11516	5.99817	P	A	P	P	P	P	P	P	P	P	P	M	hsa_circRNA_100331	hsa_circ_0000128	exonic	chr1	+	151139409	151139890	uc001ewz.3	SCNM1	TAACAGTTGCTGCCGCCGGAAGTACAGCTTTGCTTGTGCCATCTGC
ASCRP000717	155.5	160.5	206.667	168.167	189.667	148.167	765.167	521.167	170.5	243.167	234.5	257	7.72947	8.27174	8.16037	7.88487	8.09843	7.99232	8.34764	7.96354	7.69083	8.07016	7.73312	7.15833	P	P	P	P	P	P	P	P	P	P	P	P	hsa_circRNA_100332	hsa_circ_0014130	exonic	chr1	+	151206672	151212515	uc021oyo.1	PIP5K1A	GTATTTAAGAAGATTCCCTAACCTCAACCAGAACCCTCGGACTTTG
ASCRP000719	2340.33	1242	2605	1351.33	2797.83	2038.83	2813	2529.67	1595.83	1744	2051.67	13268	11.6084	11.4041	11.9892	11.1413	11.6317	11.4435	10.5518	10.6016	11.4963	11.6406	11.3466	11.8669	P	P	A	P	P	P	M	P	P	A	P	P	hsa_circRNA_100334	hsa_circ_0014132	exonic	chr1	+	151214598	151215043	uc021oyo.1	PIP5K1A	TAACTACAAGTGAAGCCTTCTCCTTCCAAAAAGTTTCGGTCTGGCT
ASCRP000720	76.1667	75.6667	61.6667	68.6667	58.6667	55.3333	187.167	195.167	95.6667	101.333	94.6667	140.667	6.39317	6.72625	6.15713	6.28582	5.97032	6.08066	6.42456	6.46505	6.50933	6.39079	5.82304	6.1602	P	P	A	P	A	A	P	P	P	P	A	M	hsa_circRNA_100335	hsa_circ_0006892	exonic	chr1	-	151288048	151288985	uc001exr.3	PI4KB	AATGAGGATGAGCTTGGAAGCTCGAAGTCTGGCTGTGGCCATGGGA
ASCRP000724	64.3333	54.6667	63.6667	52.6667	62.3333	56.6667	122.167	154.667	90.1667	95.8333	114	162	6.03428	5.98664	6.24828	5.83966	6.07061	6.04743	5.91014	6.13873	6.39238	6.26488	6.25862	6.39555	A	A	A	A	A	A	P	M	P	P	P	M	hsa_circRNA_100339	hsa_circ_0000131	exonic	chr1	+	151611363	151641111	uc001eyp.3	SNX27	TTGCTGTTACCTACTTCTTTCATCAGGAACCACGTGAATGTTGAGG
ASCRP000727	71.5	60.8333	68.3333	67.6667	68.6667	60.6667	190.667	204.5	86.6667	101.667	110.333	128.167	6.3042	6.21718	6.37081	6.25384	6.30982	6.30109	6.45025	6.53538	6.25548	6.40336	6.18759	6.0466	P	A	A	P	P	A	P	M	P	P	P	P	hsa_circRNA_100342	hsa_circ_0014292	exonic	chr1	+	153723570	153730239	uc001fcv.3	INTS3	AACGTGCACGGGAGTGGGTCCTGAAGAGCAGCATCCTCATTGCCAT
ASCRP000729	75.6667	63.6667	72.3333	62.3333	72.6667	66.3333	130.333	162.333	106.5	113	116.5	151.667	6.39325	6.37185	6.4871	6.1582	6.39667	6.46048	6.00229	6.24552	6.78356	6.65439	6.30018	6.29201	P	A	P	M	P	A	P	P	P	P	P	P	hsa_circRNA_100344	hsa_circ_0005964	exonic	chr1	+	153727117	153730239	uc001fcv.3	INTS3	AACGTGCACGGTATCCTACAGCTTCTTCAGTCAAGAACATCCCGAA
ASCRP000732	60.6667	52	47.6667	56.8333	64.3333	54.8333	103.5	104.333	71.3333	74.5	109	164.667	5.9742	5.83929	5.70921	5.95909	6.12666	5.939	5.73071	5.67094	5.65001	5.61127	6.11676	6.40486	A	A	A	P	A	A	P	P	A	A	A	P	hsa_circRNA_100347	hsa_circ_0014405	exonic	chr1	+	154231452	154232505	uc010pek.2	UBAP2L	CCTTATTCTGCCACAAGTATATGGTTATGATGACTTGCAGATGCTT
ASCRP000734	70.5	68.1667	58.5	58.5	63.6667	61	225	246	79.3333	87.8333	96.3333	136.5	6.18524	6.50054	6.11405	6.04274	6.14331	6.30196	6.67033	6.82182	5.93133	6.03608	5.83405	6.13718	P	A	A	P	A	A	P	P	A	P	A	P	hsa_circRNA_100349	hsa_circ_0014437	exonic	chr1	-	154560600	154560734	uc001ffh.3	ADAR	GTGGAGAACGCACTGCTCCGTGTGGAGATGGCGCCCTCTTTGACAA
ASCRP000735	84.8333	59.3333	80.1667	82.1667	78	73.5	340.333	341	99	134	149.167	259.833	6.57555	6.11783	6.66252	6.58755	6.5367	6.74159	7.18677	7.29461	6.61458	7.00503	6.83741	7.17542	P	A	P	P	P	P	P	P	A	P	P	P	hsa_circRNA_100350	hsa_circ_0014528	exonic	chr1	-	155235650	155236686	uc001fjw.3	CLK2	CCTAGAGAAGCCTCTGTGTCCAGATGTTTGACTGGTTTGACTACCA
ASCRP000736	378	228.333	258.167	363.833	406	273	1066.83	1169.5	343.333	382	469	1447.67	9.1586	8.81445	8.50447	9.24952	9.22437	8.956	8.86128	9.13303	8.8128	8.86783	8.95579	9.41954	P	P	M	P	P	P	P	P	P	P	P	P	hsa_circRNA_100351	hsa_circ_0007608	exonic	chr1	-	155340294	155340774	uc001fkt.3	ASH1L	AATGCAGAAATGAATGATCTTTGCTGAGTGTTCCCCCAACACTTGC
ASCRP000737	402.333	259.5	175	467	409	280	751.5	614.667	277.333	290.333	353.333	1233	9.25947	9.047	7.88852	9.61262	9.24049	8.98344	8.30775	8.16706	8.50276	8.35171	8.4757	9.21813	M	P	P	P	P	P	P	P	P	P	P	P	hsa_circRNA_100352	hsa_circ_0000137	exonic	chr1	-	155408117	155408859	uc001fkt.3	ASH1L	ATAATAAAAGTAAACGGAGTTCCCTCTCGAAGTCCAAGATTAGTTG
ASCRP000738	130.667	88.1667	106.667	171	165.667	108.5	206.833	244.833	201.833	186	201.667	277.167	7.39454	7.05652	7.12089	7.93011	7.86605	7.45146	6.56259	6.81678	7.99952	7.62279	7.40322	7.26048	P	P	M	P	P	P	P	M	P	P	P	P	hsa_circRNA_100353	hsa_circ_0003247	exonic	chr1	-	155408117	155429689	uc001fkt.3	ASH1L	AGCAAGAGAATAATAAAAGGCTCCCAGCCAACCTCTGATAAACCCT
ASCRP000740	76	51	45.6667	81.3333	74.3333	52.1667	168.333	227	72	74.6667	122	251	6.36428	5.84144	5.63384	6.58718	6.48917	5.88734	6.3072	6.70751	5.67982	5.61587	6.39258	7.11284	P	A	A	P	P	A	P	P	A	A	P	P	hsa_circRNA_100355	hsa_circ_0014614	exonic	chr1	+	155695172	155695810	uc001flq.3	DAP3	TATTCCAGATGGTGAAGACATTCAGTGAAGCTTGCCTGATGGTAAG
ASCRP000741	413.5	269.833	819.333	343	460.833	392.833	2607.33	883	823.5	906.167	932.333	1145	9.30874	9.1436	10.0502	9.14193	9.40356	9.35926	10.3338	8.72756	10.3124	10.4023	10.1379	9.13646	P	P	P	P	P	P	A	P	P	P	P	P	hsa_circRNA_100356	hsa_circ_0014624	exonic	chr1	-	155734790	155736500	uc001fmb.4	GON4L	TTCTGTCCCAGAACTCCAGGCCAGTCTGCCATCCATCCAGGAAGAA
ASCRP000742	94.1667	56.6667	57.1667	133.833	110.667	64.5	143.833	154.333	87.5	91.1667	143.333	180	6.77659	6.13055	6.07607	7.50294	7.1642	6.41785	6.10909	6.17589	6.31045	6.14779	6.74617	6.56349	P	A	A	P	P	A	P	P	P	P	P	P	hsa_circRNA_100357	hsa_circ_0014628	exonic	chr1	-	155742856	155753880	uc001fly.1	GON4L	CTGAGGACAATTCCAAGATGAGATGGGATTCTCCAACATGGAAGAT
ASCRP000743	78.3333	68.3333	56	81.3333	77.3333	59.8333	239.167	170.833	81.6667	85.1667	104.833	127.333	6.4238	6.5381	5.97258	6.5835	6.50619	6.26849	6.75216	6.31644	6.10832	6.00997	6.08553	6.02468	P	A	A	P	P	A	P	P	A	P	P	P	hsa_circRNA_100358	hsa_circ_0000139	exonic	chr1	-	155823066	155823597	uc001fly.1	GON4L	GAAGAAGGAGAATGGAACAAAAGTGGGACTTTTAAAATGTTGCCCT
ASCRP000745	104.333	88.1667	113	104	104.667	87.1667	271.667	230.167	122	143.667	160.667	189.667	6.93552	7.02382	7.25052	7.05131	7.06145	7.03304	6.90843	6.71233	7.04161	7.1526	6.97954	6.64623	P	M	P	P	P	P	P	P	M	P	P	P	hsa_circRNA_100360	hsa_circ_0005758	exonic	chr1	-	155891165	155893478	uc009wrl.1	KIAA0907	CACTGGACAGTCACCCCAAACCAGAAGGCCTGGCTGCTGCCAAGAA
ASCRP000746	106.5	87.5	75.6667	112.333	102.167	89.3333	322.5	312.667	105.667	134.5	146	254.5	6.99588	7.065	6.58092	7.17108	7.03056	7.09587	7.11855	7.15201	6.7371	7.00926	6.77225	7.15002	P	P	P	P	A	A	P	P	P	P	P	P	hsa_circRNA_100361	hsa_circ_0008339	exonic	chr1	-	155896466	155896947	uc009wrl.1	KIAA0907	CCAGTCAGGGGGATCGTCCATTATATCTTCATGTTCAGGGCCAGAC
ASCRP000748	66.8333	50.5	46.6667	72.5	70	50.3333	110.833	141.5	75.5	76.8333	126.667	184.833	6.18644	5.75559	5.70049	6.35768	6.29433	5.77354	5.82079	6.07096	5.7486	5.61714	6.51872	6.61878	A	A	A	P	P	A	P	M	A	A	A	P	hsa_circRNA_100363	hsa_circ_0014717	exonic	chr1	-	156290629	156304709	uc001fol.2	CCT3	AAGAGTGGAAAAGACTATTGCAGATATCATCCGAACATGTTTGGGA
ASCRP000749	81.3333	58.5	52	84.6667	94.3333	60.3333	140	172.667	80.1667	86.5	162.667	250	6.48624	6.1379	5.80433	6.64671	6.87186	6.26766	6.07636	6.31622	6.08128	6.0187	7.00333	7.11766	P	A	A	P	P	A	P	P	A	P	M	P	hsa_circRNA_100364	hsa_circ_0004680	exonic	chr1	-	156303337	156304709	uc001fol.2	CCT3	GACCACATCAGTAATTATTCTTGACTATTGCAGATATCATCCGAAC
ASCRP000751	84.6667	81.3333	81	70.8333	83.5	76.8333	173.333	140.167	86.1667	88.3333	118.167	159.833	6.55312	6.89726	6.68439	6.31201	6.62563	6.80073	6.33141	6.02541	6.2011	6.01941	6.33154	6.34655	P	P	P	P	P	P	P	P	P	M	P	P	hsa_circRNA_100366	hsa_circ_0014877	exonic	chr1	-	160206924	160210160	uc001fvn.2	DCAF8	AAGACCGCCCAGCGTCGAAGCCTGTCTAGCAGTCCAGAGGAGATGT
ASCRP000752	45318.5	35730	28697.7	31969.8	47828.8	39955.5	50845	36432.8	24649	20927.2	30082.7	107095	15.5874	15.5992	15.2056	15.5148	15.327	15.3858	15.5425	15.1355	15.3751	15.3652	15.2964	15.151	M	M	M	M	M	M	M	A	M	M	M	M	hsa_circRNA_100367	hsa_circ_0014879	exonic	chr1	-	160206924	160231148	uc001fvn.2	DCAF8	GCCCAGCGTCTCCTTCAGTGAATCTACAGACCTATTTTCTCAGGAG
ASCRP000753	66.5	57.1667	56.3333	56.1667	58.1667	55.3333	146.667	166.5	72.3333	77.1667	95.6667	111.167	6.14047	6.07092	5.94773	5.91172	5.91704	5.93999	6.114	6.27662	5.65048	5.61111	5.78243	5.80937	P	A	A	A	A	A	M	P	A	A	A	P	hsa_circRNA_100368	hsa_circ_0014923	exonic	chr1	-	160281657	160282957	uc009wtj.1	COPA	ATGTAGCTGTGATGCAGTTGCGGAGGACTGGGGTTCAGACTTTCCG
ASCRP000755	80.3333	61.1667	72	71.8333	72.6667	65.6667	202	166.833	122.5	126.333	142.333	173.833	6.48968	6.28265	6.48745	6.36168	6.4101	6.42202	6.52416	6.27093	7.09123	6.8691	6.77051	6.49753	P	A	A	P	P	A	P	P	P	P	P	P	hsa_circRNA_100370	hsa_circ_0015002	exonic	chr1	+	161293403	161298287	uc001gag.3	SDHC	CTATCTACAGACACGTTGGTCGTCATTGCCTCCGAGCCCACTTTAG
ASCRP000756	68.3333	54.8333	61	64.5	64.1667	59.3333	160	153	97.6667	111.833	116.333	148.167	6.15447	5.90074	6.15107	6.12636	6.15037	6.23405	6.23896	6.15735	6.55981	6.59388	6.27716	6.23857	M	A	A	P	A	A	P	P	P	P	P	P	hsa_circRNA_100371	hsa_circ_0015003	exonic	chr1	+	161293403	161310445	uc001gag.3	SDHC	TTGAGTGCAGACACGTTGGTCGTCATTGCCTCCGAGCCCACTTTAG
ASCRP000758	228.167	155.667	339.833	172	241.833	207.167	923.833	859.333	271	383.5	434.833	682.833	8.37906	8.2155	8.9027	7.93866	8.49571	8.51095	8.62596	8.69207	8.50516	8.89511	8.80771	8.47004	P	P	P	P	P	P	P	P	P	P	P	P	hsa_circRNA_100373	hsa_circ_0003039	exonic	chr1	+	161748033	161753886	uc001gbq.2	ATF6	TCAGCATGTTCCTATTCTGCTCTCTTTGCTGAACTCGGTTATTTCA
ASCRP000759	162	78.6667	139.833	87.6667	119.333	106.167	578.667	361	126.167	163.833	187.833	380	7.80274	6.8571	7.58051	6.69003	7.302	7.42226	7.92622	7.3828	7.1494	7.40013	7.30051	7.71281	P	P	P	P	P	P	P	P	P	P	P	P	hsa_circRNA_100374	hsa_circ_0007360	exonic	chr1	+	161748033	161772062	uc001gbq.2	ATF6	TGTCGGTTCAGATATTCTGCTCTCTTTGCTGAACTCGGTTATTTCA
ASCRP000760	75322.5	64010.3	62352.5	56457.5	91234	74746.8	116302	112615	52849.8	36589.8	75340.2	168067	16.4079	16.4063	16.3771	16.3293	16.4249	16.4134	16.2785	16.1548	16.136	16.1177	16.4214	16.4338	M	M	M	M	P	P	M	M	M	M	M	P	hsa_circRNA_100375	hsa_circ_0006758	exonic	chr1	+	165859440	165860559	uc001gdp.3	UCK2	TTTGTCTCCCATTCCCGTCTTCCGTGTGTGCTAAGATCGTGCAGCT
ASCRP000767	180.167	127.333	119	121.667	143	113.167	373.833	284.167	125.833	136.667	157	307.667	7.97266	7.81202	7.35077	7.30937	7.61964	7.54576	7.2983	7.01969	7.15073	7.04872	6.93193	7.40935	P	P	P	P	A	P	P	P	P	P	P	P	hsa_circRNA_100382	hsa_circ_0007277	exonic	chr1	+	168032858	168037701	uc001gey.3	DCAF6	ATCCGAGCTGACGCTCTGCTGTTGCCCGTATTCAGGAGTTCTTCAG
ASCRP000768	57	53.6667	53.5	55.8333	56.6667	51.3333	196.5	179.667	78.6667	88.6667	91.6667	116.667	5.81368	5.9211	5.97784	5.94996	5.87485	5.90499	6.48418	6.3803	5.9321	6.08997	5.78133	5.88661	A	A	A	A	A	A	P	P	A	P	A	P	hsa_circRNA_100383	hsa_circ_0015136	exonic	chr1	-	168073714	168074132	uc001gfc.3	GPR161	ATGCTAACCCTCGGGGTCATTGCCATCGACCGTCGTCCAGCATGCT
ASCRP000769	60.3333	59	63	71.5	55.1667	56.1667	155.833	148.333	75.1667	78.8333	94.1667	110.167	5.88185	6.10237	6.21297	6.33501	5.82746	6.02451	6.2013	6.12614	5.80377	5.74703	5.77376	5.79304	A	A	A	P	A	A	P	P	A	A	A	P	hsa_circRNA_100384	hsa_circ_0002093	exonic	chr1	+	168200751	168201157	uc001gfi.4	SFT2D2	ATCAATTGGGAGGTTGTTGAGGCATCTTCATTAAGCTGGAGTACCA
ASCRP000770	91.3333	74.6667	72.8333	70.5	85.1667	74.8333	4424.5	158.167	572	616.333	966.333	1268.5	6.69068	6.69396	6.51447	6.33194	6.66619	6.75979	11.7056	6.21414	9.67167	9.68805	10.1809	9.25005	P	P	P	P	P	P	P	P	P	P	P	P	hsa_circRNA_100385	hsa_circ_0004370	exonic	chr1	+	170688866	170695542	uc001ghe.3	PRRX1	GGACAGCGTCTCCGTACAGATGACCAGCTGAACTCAGAAGAAAAAA
ASCRP000772	84.6667	65.5	75.6667	79.8333	85.6667	75	137.5	129.667	101.667	112.5	107.333	139	6.56713	6.39219	6.5748	6.54496	6.68831	6.79599	6.05785	5.95137	6.64705	6.58174	6.11749	6.16047	P	A	P	P	P	P	P	P	A	P	P	P	hsa_circRNA_100387	hsa_circ_0003644	exonic	chr1	+	171492359	171496983	uc001ghr.1	PRRC2C	TGCTTGCACAGCAGAGGCCTTCGAGGAAGAGGCCCACCTCCTTCAT
ASCRP000773	109.5	77.6667	150.333	95	119.167	100.5	226.5	197.167	153.167	211.333	206.333	169.333	7.04749	6.77695	7.68446	6.8396	7.32478	7.34316	6.67744	6.49419	7.51168	7.83159	7.47444	6.46235	P	P	P	P	P	P	P	P	P	P	P	P	hsa_circRNA_100388	hsa_circ_0015232	exonic	chr1	+	171537385	171540560	uc010pmi.2	PRRC2C	TACTTTCAGCCTCACCTTCAAGGAGTCTGTAACAGACTATACTACA
ASCRP000774	95	58	90	80.1667	83.3333	66	195.333	165	106.333	133.833	138.667	195.667	6.80405	6.12491	6.85209	6.56868	6.65165	6.54005	6.47568	6.27136	6.80167	6.97491	6.64498	6.68956	P	A	P	P	P	P	P	P	P	P	P	P	hsa_circRNA_100389	hsa_circ_0004412	exonic	chr1	+	171537385	171544267	uc010pmi.2	PRRC2C	ACTCCTACAGCATCACTATCAGGAGTCTGTAACAGACTATACTACA
ASCRP000775	73.1667	61	87	67.6667	72.5	72.3333	143.667	144.667	101.667	120.333	184.333	140.833	6.29112	6.26383	6.79417	6.27832	6.41286	6.69081	6.12285	6.08339	6.69011	6.79093	7.06422	6.17549	P	A	P	A	P	P	P	P	P	P	A	P	hsa_circRNA_100390	hsa_circ_0015240	exonic	chr1	+	171546572	171546776	uc010pmi.2	PRRC2C	TCTGCAGCAGGAGCTGGTACATACACTACCTCTTCTTTGAGCACAA
ASCRP000776	9997.5	6575.17	7988.5	6647	13373.2	11357.7	9815.17	5441	4548	4276.17	6980.83	35781	13.5407	13.4914	13.4407	13.3815	13.5775	13.6561	13.1497	12.3941	13.0543	13.0926	13.3374	13.2782	M	M	M	P	M	M	P	A	P	P	P	M	hsa_circRNA_100391	hsa_circ_0015243	exonic	chr1	+	171548492	171556890	uc010pmi.2	PRRC2C	GTCCCTTCCGCTCAAATCCCAGCCTTCTATATGGACACAAGTCATT
ASCRP000779	1103	2751.67	844.5	2536.33	967.333	1046.5	12568.7	22276.5	1103.83	1379.33	2191.33	10356.5	10.6506	12.4699	10.1306	11.9886	10.3807	10.5763	13.441	14.569	10.8249	11.2339	11.4542	11.5061	P	A	P	P	P	P	P	M	P	P	P	P	hsa_circRNA_100395	hsa_circ_0015278	exonic	chr1	+	173726114	173744981	uc009wwf.3	KLHL20	CCGTAGTGGATTGGTGGTTGGTGCAGTGGAGATGCCATTTCCAGTG
ASCRP000781	75.8333	67	62.3333	74.6667	66.6667	60	249.5	530.833	87.3333	95.8333	114.5	190.667	6.36919	6.49056	6.25054	6.46203	6.24595	6.30154	6.81606	7.99742	6.22923	6.29022	6.28504	6.65833	P	A	A	P	P	A	P	P	P	P	P	P	hsa_circRNA_100397	hsa_circ_0015358	exonic	chr1	-	175996707	175996824	uc009wwv.2	RFWD2	GGCTGTGCAGTGAAGCTGTGGTCTACCAATCTAGACAACTCAGTGG
ASCRP000787	197.667	138.167	192.833	157.5	182.833	191.333	338	264.667	179.333	206.333	218.833	271.833	8.12872	7.96624	8.04449	7.78195	8.02304	8.40478	7.17511	6.92791	7.77384	7.80222	7.60114	7.24746	P	P	P	P	P	P	P	P	P	P	P	P	hsa_circRNA_100403	hsa_circ_0009064	exonic	chr1	-	176132004	176153828	uc001gkt.1	RFWD2	CAACTGGAAGCACCCCATCTGCTTTGATATGATTGAAGAAGCATAC
ASCRP000788	172.333	114.5	236	148	176.333	162.667	668.333	487.333	228.167	337	344.5	373.5	7.91158	7.62168	8.36862	7.66939	7.97181	8.13385	8.06902	7.8551	8.20739	8.62868	8.42738	7.67162	P	P	P	P	A	P	A	P	A	P	P	P	hsa_circRNA_100404	hsa_circ_0015379	exonic	chr1	-	176145045	176153828	uc001gkt.1	RFWD2	CTAATTTCTTGGCCCCATCTGCTTTGATATGATTGAAGAAGCATAC
ASCRP000789	537.833	500.333	717	584.333	545.333	891.333	789.667	752.333	1097	835.333	514.333	802.833	9.6561	10.1055	9.83146	10.0138	9.6531	10.3322	8.39567	8.46953	10.7956	10.2884	9.10145	8.69239	P	A	P	P	P	P	A	P	P	P	P	P	hsa_circRNA_100405	hsa_circ_0002846	exonic	chr1	+	178252698	178269253	uc009wxb.2	RASAL2	ACTAAACTGGATGTGAAAGGACCACCCACCCACCGTCTGTCTTGTG
ASCRP000791	74	61.5	65	76	71.5	59.6667	154	192.333	90.6667	91.8333	115	189.667	6.29065	6.26138	6.30149	6.43646	6.35208	6.251	6.18559	6.45145	6.39445	6.15831	6.2495	6.63978	P	A	A	A	P	A	A	P	P	P	P	P	hsa_circRNA_100407	hsa_circ_0006980	exonic	chr1	-	179100445	179100616	uc001gmg.4	ABL2	ATCACTAAAGAAGCTTTGCATCGTCCCTATGGTTGTGATGTTGAAC
ASCRP000792	77.3333	73	88.6667	74.6667	69.5	63.8333	129.833	119.167	88	111	113.167	111.833	6.40553	6.65718	6.82691	6.44667	6.28014	6.40159	6.00819	5.83254	6.32598	6.63473	6.2	5.82881	P	P	P	P	A	A	P	P	P	P	M	P	hsa_circRNA_100409	hsa_circ_0015438	exonic	chr1	+	179306971	179310445	uc010pnk.2	SOAT1	ATTCGAGCAGGGATTTGAGAGCACCTCCAGAACAAGGAAAGATTTT
ASCRP000794	456.333	326.833	511.333	494.333	480.5	374.5	2749	3771	474	748	938.5	1543.33	9.43883	9.45389	9.3992	9.69363	9.47951	9.30749	10.5064	11.5299	9.37968	10.0527	10.1697	9.51525	P	P	P	P	P	P	P	P	P	P	P	P	hsa_circRNA_100411	hsa_circ_0015453	exonic	chr1	+	179316734	179318077	uc010pnk.2	SOAT1	CTTACAAGGACTTTCTCTGGGTGTGCTGATTCTCTTCCTTACTTTT
ASCRP000795	206.5	174.667	209.167	239.833	223.833	183	1424	2023.33	233.167	301.667	442.667	890.667	8.18158	8.43713	8.18047	8.57462	8.37727	8.34742	9.37317	10.1274	8.25827	8.41089	8.85023	8.84875	P	P	P	P	P	M	P	P	P	P	P	P	hsa_circRNA_100412	hsa_circ_0015454	exonic	chr1	+	179316734	179319566	uc010pnk.2	SOAT1	GTGCTCTTCATGTTCTTTGGAAGTGTGCTGATTCTCTTCCTTACTT
ASCRP000796	80.5	58.1667	75.3333	58.8333	61.5	57.8333	206.667	225.667	87.3333	100	109.333	205.833	6.49764	6.2014	6.59716	5.98889	6.03754	6.11439	6.56007	6.68982	6.26617	6.38155	6.16945	6.77963	P	A	P	P	P	A	P	P	P	P	P	P	hsa_circRNA_100413	hsa_circ_0005909	exonic	chr1	+	180793888	180794480	uc009wxm.2	XPR1	GGCTGCTTAAACTGCTGCTGTATTTAAACTTGAAACAGATAGAAGT
ASCRP000797	53.1667	44.6667	42	55.6667	48	48.6667	96.8333	126	71.6667	73.6667	93.1667	120.667	5.64578	5.43025	5.47052	5.87097	5.55286	5.72633	5.6859	5.89174	5.69853	5.50697	5.74907	5.93536	A	A	A	P	A	A	P	P	A	A	A	P	hsa_circRNA_100414	hsa_circ_0007905	exonic	chr1	-	180953812	180962561	uc010pnr.2	STX6	ATGACCAGTGGACATGAAAGATCAGATGTCAACTTCATCTGTGCAG
ASCRP000799	82	66.5	99.1667	63	81.6667	69	193	172.5	136.667	134	157.167	165.667	6.4992	6.45983	7.00216	6.14827	6.62461	6.56989	6.46951	6.30687	7.30099	6.98622	6.92708	6.40674	P	A	P	P	P	P	P	P	P	P	P	P	hsa_circRNA_100416	hsa_circ_0015537	exonic	chr1	+	181546901	181549912	uc009wxr.3	CACNA1E	GCTGTACAATCATCCTGGCCACTGCAGGAACCCACTTCAATACTCA
ASCRP000802	70	62.6667	67.1667	66.3333	64.8333	55.5	139.667	148.833	86.1667	93.6667	109.333	111.833	6.22417	6.33413	6.37662	6.2255	6.24303	6.05008	6.06053	6.12046	6.22743	6.13504	6.12882	5.80079	A	A	A	P	A	A	M	P	P	P	P	P	hsa_circRNA_100419	hsa_circ_0007538	exonic	chr1	+	186359842	186360923	uc021pgg.1	C1orf27	AGAAGGACAGAGTTCAGCAAGACCAGCAGATTGGAAGTATCAAAGT
ASCRP000803	742.333	291.167	751.333	291.5	429.667	579.833	1317.17	862.167	430.667	609.333	634	644.667	10.1132	9.25803	9.91342	8.85823	9.30608	9.85357	9.24852	8.69749	9.22527	9.63856	9.45906	8.40369	P	P	P	P	P	P	P	P	P	P	M	A	hsa_circRNA_100420	hsa_circ_0015787	exonic	chr1	-	197586788	197614873	uc001gue.3	DENND1B	ACTACTGCTGCATTCCTACTTCATTGCCCCTGATGTAACTGGACTC
ASCRP000804	127	93.6667	193	121.167	170	124.5	385.833	353.667	183.5	282.333	277	271	7.33692	7.21423	8.05791	7.30748	7.89508	7.71539	7.34045	7.34956	7.82318	8.32311	8.01998	7.22447	P	P	P	P	A	P	P	P	P	P	M	P	hsa_circRNA_100421	hsa_circ_0006324	exonic	chr1	-	197611840	197627499	uc001gue.3	DENND1B	CAAATTAAGCACTTTACCTTCCCTGGTTTGAAGTGTATTACAAGCT
ASCRP000805	143.167	109.833	187.5	150.167	152.667	123.833	596.333	1090.33	171.5	269.5	309.333	408.667	7.55396	7.53682	8.00023	7.68539	7.72606	7.68482	7.96868	9.01951	7.70287	8.24178	8.21304	7.80086	M	P	A	P	P	P	M	P	P	P	P	P	hsa_circRNA_100422	hsa_circ_0015796	exonic	chr1	-	197621364	197627499	uc001gue.3	DENND1B	AATTTGAGTGTGTTACCTTCCCTGGTTTGAAGTGTATTACAAGCTT
ASCRP000807	75.3333	62.1667	69.5	65.5	65	63	113.667	114.333	85.6667	94	102.5	121.5	6.35759	6.38234	6.43685	6.20951	6.18371	6.32319	5.86363	5.75511	6.1856	6.24913	6.03558	5.95077	P	A	A	P	P	A	P	P	P	P	P	P	hsa_circRNA_100424	hsa_circ_0002869	exonic	chr1	+	201681944	201687883	uc001gwu.3	NAV1	TCACTACCGGACCCAGAGTCCCAGAGAAAGAGGACAGTGCAGAATG
ASCRP000808	196.833	142.167	194	141.5	172.333	154.333	395.5	503	190.167	230.5	253.833	546.333	8.10819	8.03087	8.07146	7.59312	7.93362	8.04033	7.37926	7.90377	7.90435	8.00425	7.87089	8.21679	P	P	P	P	P	P	A	P	P	P	M	P	hsa_circRNA_100425	hsa_circ_0015928	exonic	chr1	+	201823722	201828122	uc001gwz.3	IPO9	AACCTCTCAGGGTGCAGCCAAAGTCCTGATCTTTCCCGTGGTACAG
ASCRP000809	158	148.333	190.667	178.167	170.667	196.5	411.833	384	220.167	213.167	187.167	234	7.73508	8.09667	8.03837	7.9919	7.91993	8.45837	7.43817	7.47463	8.15616	7.84103	7.28377	7.00648	P	M	P	M	P	A	P	P	P	P	P	P	hsa_circRNA_100426	hsa_circ_0015936	exonic	chr1	+	201826223	201840455	uc001gwz.3	IPO9	GCAAAGTCAGATTAAAGTATGGACAGCCAACCCCCAACAATTTGTA
ASCRP000810	53.3333	50.3333	64.5	51.3333	52.3333	52.1667	133.333	103.333	96.8333	84.6667	103.333	114.667	5.61798	5.74824	6.29226	5.80081	5.68151	5.86826	6.02196	5.66664	6.55613	5.96384	5.99757	5.86432	A	A	A	A	A	A	P	P	P	A	P	P	hsa_circRNA_100427	hsa_circ_0015966	exonic	chr1	+	201970503	201970895	uc001gxd.3	RNPEP	ATCATTCCAGGCGTTGACCCGGACGACACCTATAATGAGACCCCCT
ASCRP000813	68.6667	57.8333	67.6667	72	67.5	58	178.5	169.167	89.8333	106.833	122.5	142.167	6.18852	6.15584	6.37091	6.39112	6.24551	6.18248	6.37432	6.30442	6.35806	6.46689	6.42877	6.20364	A	A	A	P	P	A	P	A	P	P	P	P	hsa_circRNA_100430	hsa_circ_0007167	exonic	chr1	+	203676136	203677232	uc009xaq.3	ATP2B4	TATCAACAGTGCTTATACCTCCAAGATTCTGGTCTGCTCATGTCTG
ASCRP000816	234.667	176.667	2114.33	220.667	341.5	308	1378.17	539.667	547.667	378.833	534	491.167	8.43338	8.44685	11.7119	8.45292	8.97395	9.09796	9.32015	8.01788	9.60139	8.84349	9.16675	8.05222	P	P	P	P	P	P	P	P	P	P	P	P	hsa_circRNA_100433	hsa_circ_0003600	exonic	chr1	+	204082042	204086835	uc010pqp.2	SOX13	ATTCAGCCCATTCCCTGCAAACCAGGATGTCCATGAGGAGCCCCAT
ASCRP000817	66.8333	58.1667	69.6667	60.5	60.3333	61.8333	121	125.333	80	84	99.5	115.833	6.15958	6.14439	6.39781	6.10054	6.08206	6.39808	5.92167	5.91672	5.99331	5.87915	5.9669	5.90204	A	A	P	P	A	A	P	P	A	A	P	P	hsa_circRNA_100434	hsa_circ_0016123	exonic	chr1	+	204085634	204086835	uc010pqp.2	SOX13	TGCAAACCAGGGACCCAAGAGAGCCTAGCAGAGAAGGAGCTCCAGC
ASCRP000818	446.833	311.833	810.667	399.333	536.667	497.833	1199	1152.17	623.667	864.833	802.333	925.333	9.41535	9.37069	10.0223	9.40446	9.63494	9.66403	9.08749	9.10522	9.83115	10.3388	9.80332	8.89396	P	P	M	M	M	P	P	P	P	P	P	P	hsa_circRNA_100435	hsa_circ_0016201	exonic	chr1	-	205156545	205156934	uc001hbw.3	DSTYK	TCTCTTACAGGCCAACTGAGCTGCATTTCCTTCCCACCTAAGGAAG
ASCRP000821	4070	2285	3709.67	2911.33	5044.5	5122.5	8023.67	5142.67	6007.67	5546.33	6105.33	17627.8	12.3046	12.2226	12.4332	12.216	12.2567	12.5059	12.842	12.2497	13.4524	13.6494	13.0931	12.2517	P	P	P	P	P	A	P	A	P	P	M	M	hsa_circRNA_100438	hsa_circ_0006827	exonic	chr1	-	207989273	207990759	uc001hgr.2	mir-29b-2	ATTTAACCGCTCTCTGCCTCCCAGAGGACTCAGGAGAGTGCAGCTT
ASCRP000822	87.3333	69.6667	113.5	71.8333	92.8333	81.3333	181	182.167	120.667	161.833	157.833	164.5	6.64307	6.57259	7.24595	6.37305	6.83373	6.92976	6.40054	6.38613	7.04644	7.35342	6.93522	6.42559	P	P	P	P	A	P	P	P	P	P	P	P	hsa_circRNA_100439	hsa_circ_0016343	exonic	chr1	-	210948689	210977508	uc001hib.2	KCNH1	GAGGAAGAGGCACTTCTCTATGCCACCATCTTCGGGAATGTGACGA
ASCRP000823	106.167	97	104.667	86	104.5	84.5	256.333	354.667	140.5	148	160.167	300.833	6.98331	7.2355	7.10986	6.69755	7.07152	6.98624	6.85724	7.35306	7.39129	7.20126	6.97111	7.38449	P	P	P	P	P	P	P	P	P	P	P	P	hsa_circRNA_100440	hsa_circ_0006123	exonic	chr1	-	211092981	211093411	uc001hib.2	KCNH1	ATGATTGGCTGGCATCAGCAGCCTGTTCAGCTCTCTAAAAGTTGTC
ASCRP000827	65.3333	48.6667	56	50.6667	57.3333	50	125	104.833	79.1667	83.3333	96.5	137.833	6.04894	5.62745	6.04024	5.71769	5.91011	5.71563	5.94704	5.63064	6.0425	5.8555	5.83438	6.12796	A	A	A	A	A	A	P	M	A	P	A	M	hsa_circRNA_100444	hsa_circ_0002321	exonic	chr1	+	212502476	212506940	uc001hjb.3	PPP2R5A	TCACATACAGATGCCACTTCAAATGAACAACAAGAGCTTTTCTGTC
ASCRP000828	4183	2664.17	4062.33	4125	7059.67	5783	3948.5	5787.67	3268.17	2131.33	2897.67	42735.5	12.3512	12.4415	12.5463	12.6975	12.7713	12.6322	11.4384	12.481	12.4955	11.9705	12.0142	13.5394	P	P	P	P	P	P	P	M	P	P	P	M	hsa_circRNA_100445	hsa_circ_0016404	exonic	chr1	+	212977661	212977993	uc001hjo.2	TATDN3	TTTTACAAGAGCAAGGTTGGACTAGATTTCTCCCCCAGATTTGCTG
ASCRP000830	229.5	174.333	271	195.333	217.5	251.5	552.5	503.167	261.333	388	366.167	448.833	8.38763	8.42821	8.57789	8.2061	8.32994	8.82082	7.86691	7.90338	8.44401	8.90596	8.53368	7.91574	P	P	P	P	P	P	P	P	P	P	P	P	hsa_circRNA_100447	hsa_circ_0016418	exonic	chr1	+	213134507	213147412	uc001hjv.2	VASH2	GAGAGAAGTCCCTTCAATACCCCAGGTCCCAAACTACAGGCTGTCG
ASCRP000832	112.167	93.5	129.5	100.833	122.167	104.333	215.667	278.667	136.5	139.667	161.333	326.333	7.13063	7.16322	7.47771	6.96719	7.34823	7.33348	6.61447	6.98909	7.34028	7.0801	6.98128	7.48759	P	P	M	A	P	P	P	M	P	P	P	P	hsa_circRNA_100449	hsa_circ_0007772	exonic	chr1	+	213302869	213349835	uc001hkd.3	RPS6KC1	TGATTGACAAGGCTTCTCCAGTGACAGTGATCTGGTATCTCTTACT
ASCRP000833	84.6667	80.5	89.1667	79.1667	93.1667	76.6667	312.167	283	106.167	129	132	153.833	6.55278	6.86733	6.83442	6.54344	6.84585	6.79491	7.0798	7.00746	6.78319	6.93538	6.60056	6.30625	P	P	P	P	P	P	A	P	P	P	P	P	hsa_circRNA_100450	hsa_circ_0005314	exonic	chr1	+	213341200	213349835	uc001hkd.3	RPS6KC1	GATTGACAAGGAGAGTCAAGCCCTACCCGTCGAGAAGCTGTGAAGA
ASCRP000836	460.167	211	177.667	152.667	175.333	159.667	264	230.333	122.5	143	175	254.5	9.44661	8.70302	7.92065	7.70931	7.93831	8.11812	6.87633	6.72197	7.11198	7.14376	7.15317	7.14285	P	P	P	P	P	P	P	P	M	P	P	P	hsa_circRNA_100453	hsa_circ_0008659	exonic	chr1	-	214564330	214571344	uc010pty.2	PTPN14	ATCCTCTCTGGACAATCATGGAAACTGTGTACACCTTGGCATTTTC
ASCRP000837	74	71.3333	68.8333	65.8333	76	63	111.667	142.167	94.5	109.833	109.167	174.167	6.32408	6.57296	6.342	6.20772	6.48966	6.32122	5.81748	6.0559	6.5084	6.54496	6.13266	6.50023	P	M	M	P	P	A	A	P	P	P	P	P	hsa_circRNA_100454	hsa_circ_0007015	exonic	chr1	-	214625147	214638300	uc001hkk.2	PTPN14	ATGGCTTCAGCAAGAGGCCACAAGCTATCTTCCAGAGGGCCACACT
ASCRP000838	61	58.1667	58.1667	52.8333	57.8333	53	105.333	111.667	84.5	90	92	115.5	5.928	6.19173	6.08171	5.8559	5.95426	5.95758	5.78144	5.7416	6.22924	6.09225	5.72	5.88443	A	A	A	P	A	A	P	P	P	P	A	P	hsa_circRNA_100455	hsa_circ_0007615	exonic	chr1	-	214637972	214638300	uc001hkk.2	PTPN14	GCTGCGAGAGCTATCTTCCAGAGGGCCACACTGGGCATGGACACCC
ASCRP000844	62.6667	56	54.6667	50.5	59.6667	55.6667	96.6667	114.667	88	95.5	95.3333	125.667	5.9899	6.04369	5.98795	5.71891	5.96777	6.09264	5.67013	5.77712	6.3736	6.27254	5.81491	5.98172	A	A	A	A	A	A	P	A	P	P	A	P	hsa_circRNA_100461	hsa_circ_0004879	exonic	chr1	+	223946971	223959941	uc001hob.4	CAPN2	AACAATAGAGCTCGACCTTATCTCTTTAAGTGGGCAGACCAACATC
ASCRP000847	89	87.8333	103	87.8333	97.8333	81	241.833	241.333	108.167	129.167	142.333	174.167	6.66835	7.03894	7.05978	6.70827	6.94091	6.88909	6.75723	6.78235	6.81874	6.92118	6.73453	6.5132	P	P	P	P	P	P	P	P	P	P	P	P	hsa_circRNA_100464	hsa_circ_0016600	exonic	chr1	+	225140371	225161855	uc001hot.4	DNAH14	CAGAGAAGAGCAGCCAGTTCCTTTATAGTTTTGTTCAGAAAAACAT
ASCRP000849	86.6667	72.3333	76.5	77.8333	72.1667	65.8333	217.667	152.333	85.1667	99.6667	108.167	136.333	6.65899	6.67031	6.56206	6.484	6.41691	6.47364	6.63137	6.16024	6.24367	6.36222	6.13678	6.13522	P	A	P	P	P	P	P	P	P	P	P	P	hsa_circRNA_100466	hsa_circ_0016650	exonic	chr1	-	225600155	225603034	uc001hoy.3	LBR	GCCAGCTCTGGTTGTAGAAGGAACGCCTCTTATTGATGGAAGAAGA
ASCRP000853	76.1667	61.5	70.5	68.8333	66	63.8333	297.667	512.667	86.3333	106.167	129.667	227.667	6.39112	6.30677	6.44576	6.29035	6.23957	6.43181	7.03168	7.94205	6.24802	6.50769	6.50851	6.95179	P	A	A	P	P	A	P	P	P	P	P	P	hsa_circRNA_100470	hsa_circ_0016726	exonic	chr1	+	227075791	227076750	uc001hqk.2	PSEN2	TCTGTGTATGTTCATCCATGGCTGGTTGATCATGTCTTCACTGATG
ASCRP000854	65	56.8333	75.3333	57.3333	62.6667	59.5	150.667	167	93.5	125	129.333	147	6.06202	6.00559	6.5952	6.0248	6.10393	6.21367	6.18301	6.28458	6.50507	6.85929	6.56232	6.22648	A	A	P	P	A	A	P	P	P	P	P	A	hsa_circRNA_100471	hsa_circ_0003659	exonic	chr1	-	227327276	227335260	uc001hqr.3	CDC42BPA	AAACTTCAAGGTTCAGTCCTCAGTGGCTGTAGGAACTCCAGATTAT
ASCRP000855	63	52	46.1667	48.8333	46.1667	50.6667	104.667	108.833	86	89.1667	82.3333	106	5.9696	5.85668	5.58851	5.73688	5.4429	5.6886	5.75196	5.734	6.2829	6.07562	5.49752	5.72807	A	A	A	A	A	A	P	P	P	P	A	A	hsa_circRNA_100472	hsa_circ_0016760	exonic	chr1	+	227935392	227947186	uc001hrd.3	SNAP47	AGAGCTGCTCAGTCTGGCATGCAGAGGCAGAAGAGGCCTGGACCTT
ASCRP000856	71.5	53.3333	66.8333	59	61.3333	58.6667	141	143.833	87.1667	105	109.833	123.833	6.24118	5.85195	6.37585	6.03797	6.06523	6.17564	6.08576	6.07733	6.28002	6.47362	6.15778	6.00086	P	A	A	P	A	A	P	P	P	M	P	P	hsa_circRNA_100473	hsa_circ_0016781	exonic	chr1	+	228496799	228497260	uc001hsn.3	OBSCN	TGAAAGTCACAGCTCCTGAGGTGACCATCCTGGAGCCCCTGCAGGA
ASCRP000859	350.167	190	230.5	209.667	350.5	508.667	160	172.333	162.833	168	224	1850.33	9.04776	8.5607	8.33511	8.36062	9.01127	9.69141	6.23652	6.31939	7.59679	7.44016	7.61928	9.70465	P	P	P	P	P	P	P	P	P	P	P	P	hsa_circRNA_100476	hsa_circ_0016863	exonic	chr1	+	230795209	230807386	uc001htw.3	COG2	CCATCTCCAGGAAGATTTCGATGTCGATCATTTTGTGTCTGACTGT
ASCRP000860	456.667	235.5	378.833	257	552.333	591.333	370	246.833	221.667	231.667	288.333	2812.33	9.43767	8.8853	9.03365	8.68692	9.62868	9.88306	7.26757	6.81526	8.15289	7.99347	8.10199	10.1069	P	P	P	P	P	P	P	P	P	P	P	A	hsa_circRNA_100477	hsa_circ_0016867	exonic	chr1	+	230798886	230807386	uc001htw.3	COG2	CCATCTCCAGAGCCTTAGATCGTCTGTCAGTGAAGGAATTCGGGCA
ASCRP000861	114.333	86.8333	107.833	97	103.333	90.1667	220.333	242.5	134	130.833	134	242.5	7.12264	7.04029	7.15524	6.88288	7.03505	7.08034	6.65002	6.80702	7.28352	6.94818	6.60527	7.0612	P	P	P	P	P	P	P	P	P	P	P	P	hsa_circRNA_100478	hsa_circ_0016873	exonic	chr1	-	230979099	230979642	uc001hub.3	C1orf198	GTTTGCACAGAGTCAGATGGAGTTCAGTATCTCCGCCCTATCCATC
ASCRP000862	64.1667	52	60.8333	55.6667	67.6667	58.3333	112.167	123.5	86.5	97.1667	120.333	144	5.98477	5.85582	6.15993	5.89843	6.26265	6.21726	5.85373	5.86992	6.23222	6.27546	6.36954	6.21691	A	A	A	P	P	A	P	P	P	P	A	P	hsa_circRNA_100479	hsa_circ_0000195	exonic	chr1	-	231090078	231097049	uc009xfj.3	TTC13	AATGCTTCAGAGTCATCCTTTTTGAACTTCCATGACTCAGACTGCG
ASCRP000868	64.3333	50.5	49.8333	67.8333	61.3333	56.6667	101.667	133	85.6667	84.5	104	108.833	5.98811	5.66942	5.72747	6.26791	6.00709	6.06184	5.75136	5.97098	6.2045	5.95085	6.02046	5.79689	A	A	A	P	A	A	P	P	A	A	P	A	hsa_circRNA_100485	hsa_circ_0006635	exonic	chr1	-	233296028	233344435	uc001hvp.1	PCNXL2	AACGGGAAGTGAGAGGGACACAACCAAATCATAACATATAGCAGAC
ASCRP000869	68.1667	50.5	48.3333	79.6667	69.8333	54.1667	101.833	168.167	79	88.6667	111.5	121.167	6.16526	5.76477	5.7332	6.60285	6.37531	5.91209	5.73062	6.27531	6.01148	6.07986	6.19202	5.93532	A	A	A	P	M	A	P	P	A	P	A	P	hsa_circRNA_100486	hsa_circ_0001958	exonic	chr1	-	233313547	233344435	uc001hvp.1	PCNXL2	GAAAGATTCAGTGGGACACAACCAAATCATAACATATAGCAGACCA
ASCRP000870	67.6667	415.167	45.8333	72.8333	69	53.3333	109.167	148.333	82.1667	84.3333	109.333	119.333	6.1408	7.56705	5.53819	6.37679	6.28412	5.96207	5.81049	6.12369	6.10913	5.90168	6.15851	5.91605	A	A	A	P	P	A	P	P	A	A	P	M	hsa_circRNA_100487	hsa_circ_0005223	exonic	chr1	-	233334684	233344435	uc001hvp.1	PCNXL2	TCAGTGCAGTGAAGGGACACAACCAAATCATAACATATAGCAGACC
ASCRP000871	103.167	93	93.3333	98.3333	101.833	84	176	214.667	125	142.333	144	210.167	6.95785	7.16459	6.89907	6.92053	7.04237	6.95588	6.34366	6.61639	7.13924	7.16084	6.76354	6.82068	P	P	P	P	P	P	P	P	P	P	P	P	hsa_circRNA_100488	hsa_circ_0000198	exonic	chr1	-	233334684	233372726	uc009xfv.1	PCNXL2	CTGCTTCAGTGCAGTGAAGAGAGATGCAGGTCAGCTCCTCCAGTAC
ASCRP000873	68.3333	49.8333	45.8333	74.5	65	49.1667	95.6667	176.167	71.3333	78	105.333	125.667	6.18364	5.62847	5.56235	6.43394	6.15181	5.76034	5.67013	6.35091	5.63842	5.73066	6.06939	6.01378	A	A	A	P	A	A	P	P	A	A	P	P	hsa_circRNA_100490	hsa_circ_0006415	exonic	chr1	-	233344263	233372726	uc009xfv.1	PCNXL2	TCTACAATCAGCTAGGGACTACTTAATAGAGAGATGCAGGTCAGCT
ASCRP000874	66	56	54.1667	61.6667	62.3333	52	199.5	152.833	80.3333	90.1667	97.1667	116.167	6.08909	6.02698	5.91327	6.11568	6.11909	5.88665	6.50903	6.16825	6.031	6.0908	5.87902	5.86517	A	A	A	P	A	A	P	P	A	P	A	P	hsa_circRNA_100491	hsa_circ_0003314	exonic	chr1	-	233353644	233363117	uc001hvl.2	PCNXL2	ACCAATACACCATGTGAGTCAGGATCTGGAAGCCTCGTCATGTTCT
ASCRP000875	19192.8	14836.7	13940.8	18166.2	28649	23533.5	11601	7258.17	10894	8131.17	15474.3	40785.7	14.4032	14.5039	14.2699	14.6284	14.5755	14.587	13.3267	12.8314	14.2551	14.3642	14.5108	13.4649	M	P	P	M	P	M	P	P	P	P	M	P	hsa_circRNA_100492	hsa_circ_0016979	exonic	chr1	-	233353644	233372726	uc009xfv.1	PCNXL2	ACCCCGCCTCACCAATACACAGAGATGCAGGTCAGCTCCTCCAGTA
ASCRP000876	58	54.6667	63.8333	48.5	63.3333	54.6667	512.333	140.5	288.833	211.5	231.833	303.667	5.82603	5.93914	6.26166	5.7229	6.12725	6.06489	7.7146	6.06568	8.58991	7.85259	7.70202	7.39683	A	A	A	A	A	A	M	P	P	P	P	P	hsa_circRNA_100493	hsa_circ_0017069	exonic	chr1	-	235634163	235658138	uc001hxc.2	B3GALNT2	AGAGTCATTACAATCAGTTGGCCTTATTTCCTCAGTGGAAATCTAC
ASCRP000877	60	54.6667	64.6667	54.6667	64.6667	55.3333	143.167	152.667	86.5	107.333	117.5	207.167	5.92086	6.00942	6.28217	5.93154	6.16988	6.06103	6.10407	6.15068	6.27155	6.52413	6.3153	6.80154	A	A	A	P	P	A	P	P	P	P	P	P	hsa_circRNA_100494	hsa_circ_0002343	exonic	chr1	-	235643369	235658138	uc001hxc.2	B3GALNT2	ATCTTACCAGAGATCAGTTGGCCTTATTTCCTCAGTGGAAATCTAC
ASCRP000879	66.8333	61.3333	65.1667	61.3333	60.8333	54.6667	106.667	105.5	77.1667	79.3333	99.5	135.5	6.06403	6.22698	6.31801	6.13173	6.04277	6.04385	5.76861	5.66759	5.86712	5.74248	5.94459	6.12369	A	A	A	P	P	A	M	P	A	A	A	P	hsa_circRNA_100497	hsa_circ_0017105	exonic	chr1	-	236187369	236201553	uc001hxo.3	NID1	CGGGCGAACCTGCTATGTTTTCAGCTATAACACGGATTCCCGCCAG
ASCRP000880	1892.33	1070.33	1890.83	1305.5	1336	1124.17	3253.33	1534.17	1595.33	1525.5	886	1655.67	11.3974	11.2156	11.5196	11.1197	10.7523	10.6992	10.9197	9.62361	11.5022	11.4275	10.0405	9.5777	P	P	P	P	P	P	A	P	P	P	A	P	hsa_circRNA_100498	hsa_circ_0017109	exonic	chr1	-	236192849	236201553	uc001hxo.3	NID1	TGTACCACTACTCCACCTCAGTTTTCAGCTATAACACGGATTCCCG
ASCRP000881	161.5	149.5	128.667	169.333	104	139.5	1428.67	1943.17	143.833	193	269.167	591.667	7.80865	8.11534	7.45162	7.9137	7.06428	7.87378	9.37874	10.0666	7.44129	7.69482	7.98031	8.30249	P	P	P	P	A	P	P	P	P	P	P	P	hsa_circRNA_100499	hsa_circ_0004039	exonic	chr1	+	236969443	236979843	uc010pxw.2	MTR	AACCACTCTGGAATACTTGCTGGCTGGGGCAGATATCATTGAAACA
ASCRP000886	50.3333	49.5	47.3333	58.6667	50.3333	47	105.5	139.333	70.3333	74.3333	92	127.667	5.56233	5.67756	5.67026	5.99624	5.67107	5.58308	5.76715	6.05312	5.60129	5.53552	5.74946	6.02469	A	A	A	P	A	A	P	P	A	A	A	P	hsa_circRNA_100504	hsa_circ_0017248	exonic	chr1	-	243736227	244006584	uc001hzz.1	AKT3	AAAGATTGTGTACCGTGATCTCAAGGCTGAGTCATCACTAGAGAGT
ASCRP000889	435.667	287.333	474	341.667	388.333	376.833	955	958.333	366.5	451.333	474.333	779.833	9.36557	9.24162	9.32405	9.12893	9.1496	9.30289	8.6694	8.84725	8.90983	9.15046	8.98035	8.64723	P	P	P	P	P	P	P	P	P	P	P	P	hsa_circRNA_100507	hsa_circ_0009150	exonic	chr1	+	245530135	245530669	uc010pyq.1	KIF26B	ACCCATACCAGGACCCTGCTTTCTCGGCTGTGATTCACGACAAACT
ASCRP000890	30167	26447	24769.5	24633.3	39555.5	31912.8	28570.8	15196.3	16852	15722.3	28463.3	74969.8	14.9536	15.2481	15.0279	15.1576	14.9999	15.0216	14.7186	13.8979	14.7925	15.0281	15.1329	14.3777	M	M	P	P	P	P	M	M	A	P	P	M	hsa_circRNA_100508	hsa_circ_0017280	exonic	chr1	+	245530135	245583047	uc010pyq.1	KIF26B	GCCGCCTCCTTCTTTGCACGGACCCTGCTTTCTCGGCTGTGATTCA
ASCRP000892	150	115.5	193.167	137.5	146	122.833	391.167	258.167	168.833	215.5	215.5	236.333	7.64779	7.63265	8.04733	7.54748	7.65708	7.68693	7.35943	6.876	7.6638	7.8686	7.54492	7.01765	P	P	P	P	P	P	P	P	P	P	P	P	hsa_circRNA_100510	hsa_circ_0017287	exonic	chr1	-	246021797	246078942	uc001ibj.3	SMYD3	AGCCATACAGCTCACCATCTGCTACCTGGATATGCTGATGACCAGT
ASCRP000893	63.1667	54.3333	61.3333	57.3333	62	58	116.333	121.333	81.3333	92	104.667	143.333	5.99958	5.94688	6.19204	5.98608	6.03819	6.16041	5.89272	5.86945	6.0826	6.14834	6.06481	6.19204	A	A	A	P	A	A	P	P	A	P	A	P	hsa_circRNA_100511	hsa_circ_0017289	exonic	chr1	-	246021797	246093239	uc001ibk.3	SMYD3	CATGGAGCCATACAGGTGATCTGCAACTCTTTCACCATCTGTAATG
ASCRP000894	70.6667	57	66.8333	59.3333	61	56.3333	132.5	134.667	87.8333	101	112.333	148.833	6.23523	6.04521	6.33775	6.0428	5.98879	6.0442	6.00821	5.96029	6.3109	6.40616	6.18652	6.25332	A	A	A	P	A	A	P	P	A	P	M	P	hsa_circRNA_100512	hsa_circ_0005090	exonic	chr1	-	246078831	246093239	uc001ibk.3	SMYD3	CAAACCCAGGACAAGGTGATCTGCAACTCTTTCACCATCTGTAATG
ASCRP000899	88	73	60.3333	125.333	83.8333	61.5	268.833	446.667	83.5	88.1667	145.667	454.5	6.61824	6.61775	6.11724	7.37044	6.68011	6.26594	6.89469	7.70401	6.14034	6.08172	6.79561	7.93264	P	A	A	P	P	A	P	P	A	P	P	P	hsa_circRNA_100517	hsa_circ_0017348	exonic	chr1	-	247322307	247323115	uc001ici.3	ZNF124	AGAAATCTAAGAACTCGGTTGCCTTTGAGGATGTGGCTGTGAACTT
ASCRP000902	53.3333	49.3333	61.1667	50	56	51	138.333	114	85.6667	94	99.8333	100.167	5.69121	5.72086	6.17797	5.72127	5.86778	5.94087	6.0748	5.76829	6.24988	6.22075	5.9553	5.62885	A	A	A	A	A	A	P	P	P	P	P	A	hsa_circRNA_100521	hsa_circ_0017438	exonic	chr10	+	1118055	1126416	uc009xhm.1	WDR37	AAGGCTTCCACCAGCAAGCTTATTGCAGGAGTGACCAGGACACTAC
ASCRP000906	144.667	104.667	231.333	126.167	168.833	139.167	400.167	385.167	213.167	315.333	296.333	251.833	7.56044	7.44393	8.32472	7.36061	7.91048	7.90753	7.39696	7.49029	8.08844	8.49179	8.15123	7.1243	P	P	P	P	P	P	P	P	P	P	P	P	hsa_circRNA_100525	hsa_circ_0017443	exonic	chr10	+	1123846	1142186	uc001igg.1	WDR37	TGACACTAGTGATTCTAAACTGCCTTCCTCGGTTCGCAGTACACTT
ASCRP000907	101.833	78.8333	95.5	84.5	90	73	190.833	159.333	95.6667	99	143.667	186.833	6.91665	6.83199	6.96488	6.65866	6.7563	6.68083	6.46066	6.21283	6.50876	6.32236	6.72904	6.60166	P	P	P	P	P	P	P	P	P	P	P	P	hsa_circRNA_100526	hsa_circ_0004277	exonic	chr10	+	1125950	1126416	uc001igg.1	WDR37	CCACCAGCAAGTACGTAGAGAAATCGACACTCTTAATGAACGTTTA
ASCRP000908	68.1667	55.3333	52.6667	65	62.3333	54	111.333	127.167	78.6667	83.3333	120.667	161.333	6.146	5.9655	5.87921	6.18881	6.10981	5.96545	5.83582	5.89085	5.87115	5.88198	6.36808	6.3977	P	A	A	P	A	A	P	M	A	A	P	P	hsa_circRNA_100527	hsa_circ_0017446	exonic	chr10	+	1125950	1132297	uc001igg.1	WDR37	CGTGGGCTCAGTACGTAGAGAAATCGACACTCTTAATGAACGTTTA
ASCRP000909	130.667	107	143.167	102.667	137.833	100.667	341.667	496.833	210.833	212.833	217.833	810	7.39239	7.49009	7.61509	6.99371	7.5771	7.34777	7.19221	7.87972	8.07213	7.86958	7.57301	8.57074	P	P	P	P	P	P	P	P	P	P	P	A	hsa_circRNA_100528	hsa_circ_0017454	exonic	chr10	+	1130342	1132297	uc001igg.1	WDR37	GCCACGTGGGCTCAGATTGTCTCCAGCTTTAAGACCACGACATCGA
ASCRP000910	77.1667	68.3333	72.1667	63.6667	77	62.6667	173.667	244.167	105	117.833	129	247.333	6.3774	6.51011	6.5083	6.17676	6.48708	6.42299	6.34608	6.80617	6.73183	6.72789	6.55734	7.09172	P	A	P	P	P	P	P	P	P	A	P	P	hsa_circRNA_100529	hsa_circ_0000206	exonic	chr10	+	1130342	1142186	uc001igg.1	WDR37	GTTGCTGACACTAGTATTGTCTCCAGCTTTAAGACCACGACATCGA
ASCRP000911	95.8333	71	90.8333	64.3333	72	65.5	183.833	174.5	102.833	118	120.667	158.333	6.81466	6.56866	6.8813	6.19306	6.3727	6.43414	6.40436	6.33176	6.71864	6.73737	6.39551	6.35814	P	A	P	P	A	P	P	P	P	P	M	P	hsa_circRNA_100530	hsa_circ_0007796	exonic	chr10	+	1130342	1151207	uc009xhm.1	WDR37	CCAGGGACACACGGAATTGTCTCCAGCTTTAAGACCACGACATCGA
ASCRP000914	10441.8	7465.67	8903.67	7488.33	10835.3	10181	10197.7	11839.5	9843.33	7360.17	7150.67	42616.3	13.6157	13.7275	13.5644	13.5145	13.3924	13.5562	13.1866	13.4854	14.0827	14.1235	13.4588	13.5411	P	M	P	M	P	P	A	P	P	P	P	M	hsa_circRNA_100533	hsa_circ_0006608	exonic	chr10	+	3160973	3162236	uc009xhr.3	PFKP	ACACTATCACCGACCGTTCTCCCGGGGAAGTACTTGGAAGAGATCG
ASCRP000915	60.3333	54	56	57.3333	59.5	51.1667	152.333	194.167	78.1667	85.5	100.667	149.167	5.93057	5.98416	5.97483	5.98872	5.99952	5.88606	6.1819	6.48209	5.98434	5.92274	6.0118	6.27932	A	A	A	P	A	A	P	P	A	P	M	P	hsa_circRNA_100534	hsa_circ_0017510	exonic	chr10	-	3201105	3202522	uc001igr.2	PITRM1	CTGATGTTGGGTTCTTCACGTACGGTAATTTTCCATTAGAACAGCA
ASCRP000916	51.6667	44.5	45	56	55	44	95.5	134.667	70.3333	70	104.667	199.667	5.59344	5.39855	5.45922	5.95804	5.79273	5.47545	5.66845	5.97061	5.54231	5.38384	6.06972	6.72973	A	A	A	P	A	A	P	M	A	A	P	P	hsa_circRNA_100536	hsa_circ_0005379	exonic	chr10	-	5827104	5842668	uc001iil.4	GDI2	GGATTTGCAAGGAATGTATCCTGTCAGGTATAATGTCAGTGAATGG
ASCRP000917	60.8333	48.8333	52.3333	61.5	62.1667	51	116.667	151	75.6667	76.1667	117	228.5	5.96212	5.69516	5.85713	6.13992	6.05404	5.84243	5.88194	6.13324	5.81799	5.69492	6.2889	6.959	A	A	A	P	A	A	P	P	A	A	P	P	hsa_circRNA_100537	hsa_circ_0002665	exonic	chr10	-	5836847	5842668	uc001iil.4	GDI2	CCTGGCATCTAGAATGTATCCTGTCAGGTATAATGTCAGTGAATGG
ASCRP000921	4682.33	2869.5	4038.83	3645.17	6845	6001	3602	3330	3127	2737.5	3440.33	24179.2	12.5182	12.5565	12.5432	12.5075	12.7389	12.6712	11.1985	11.2448	12.4249	12.4523	12.3385	12.7	P	P	P	M	P	P	P	P	P	P	P	M	hsa_circRNA_100541	hsa_circ_0017636	exonic	chr10	-	7285519	7327916	uc010qay.2	SFMBT2	TAAAAATGGAGTCAGCCTCACTCCTCCCAAAGCAATCAAAGAGAAG
ASCRP000922	560.5	284.333	393.167	354.167	934	751.833	502.667	541.167	366.333	294.667	494	8059.67	9.70171	9.20956	9.11954	9.19244	10.3337	10.1697	7.72894	8.01655	8.91723	8.3672	9.03984	11.1882	M	M	P	P	M	P	P	P	P	P	P	P	hsa_circRNA_100542	hsa_circ_0017639	exonic	chr10	-	7290509	7327916	uc010qay.2	SFMBT2	TTACATCTCTCCTGCGTCGGTGACTAAGCAATCAAAGAGAAGTACA
ASCRP000924	87.8333	76.8333	101.5	92	95	83.1667	224.333	143.667	111.667	137.333	151	135	6.65206	6.74905	7.05641	6.75232	6.89063	6.95629	6.66138	6.07307	6.8739	7.02567	6.86327	6.11526	P	P	P	P	P	P	P	P	P	P	P	P	hsa_circRNA_100544	hsa_circ_0017643	exonic	chr10	-	7325865	7327916	uc010qay.2	SFMBT2	TACAGAATGGACCCACCTTCAGCAATCAAAGAGAAGTACACAGACT
ASCRP000926	73.6667	56.6667	45.5	68.3333	67.3333	53.1667	155.167	235.5	76	79	106.333	208.5	6.33331	6.04509	5.62092	6.25941	6.28255	5.8771	6.20592	6.74276	5.7893	5.71494	6.1054	6.74517	P	A	A	P	P	A	P	P	A	A	P	M	hsa_circRNA_100546	hsa_circ_0007292	exonic	chr10	+	7839009	7844817	uc001iju.3	ATP5C1	TTGAAATTATCTCTGGTGCTGCAGCTCTTCACCAGGAGACTAAAGT
ASCRP000929	348.167	349.5	395.667	364.667	417.333	283.167	1529	817.5	403.333	411.333	479.167	659.5	9.04226	9.55126	9.13035	9.26862	9.25706	8.99823	9.49755	8.61503	9.09058	8.99693	8.98689	8.4315	P	P	P	P	P	P	P	P	P	P	P	P	hsa_circRNA_100549	hsa_circ_0004630	exonic	chr10	+	12123470	12136270	uc001ild.4	DHTKD1	ATTCTACACCAACCCCATCATGTACAAAATCATCAGTTGATCATGG
ASCRP000933	139.667	141	167.667	148.833	141	122.333	381	239.5	129	161	157.833	194.333	7.52812	8.02007	7.83654	7.66967	7.59823	7.67218	7.3289	6.76734	7.19879	7.36374	6.96737	6.68859	P	P	P	P	P	P	P	P	P	P	P	P	hsa_circRNA_100553	hsa_circ_0017777	exonic	chr10	+	12251965	12252321	uc009xja.2	CDC123	CACGCTTACGGGATGATCCACCAACACATTCTCAGCCAGACAGTGA
ASCRP000939	56.1667	52.3333	45.1667	68.6667	62.8333	46.5	165.333	248	66	69.5	90	135	5.71083	5.82995	5.60403	6.27313	6.07657	5.58308	6.2696	6.83176	5.31046	5.35594	5.6987	6.10554	A	A	A	P	A	A	P	P	A	A	A	P	hsa_circRNA_100559	hsa_circ_0000219	exonic	chr10	-	15858833	15889942	uc001iod.1	FAM188A	CGTATTTTTTGCCAAGGGTTTGTGTTTAGTGAATCAGAGGGATCTG
ASCRP000941	49.3333	45.3333	42	63.1667	53.5	44.1667	136.833	234.833	64.3333	70.1667	86.5	109.167	5.51042	5.39395	5.42534	6.14927	5.79371	5.55555	6.04309	6.75254	5.2908	5.39502	5.66126	5.7843	A	A	A	P	A	A	P	P	A	A	A	P	hsa_circRNA_100561	hsa_circ_0006665	exonic	chr10	-	15875628	15889942	uc001iod.1	FAM188A	TGCTCAGGAATGAGGTTTGTGTTTAGTGAATCAGAGGGATCTGCAT
ASCRP000942	651	462.333	780.167	575.333	999.333	1262.5	743.333	730	760.667	582.667	706.333	5680.17	9.92675	9.96022	9.96706	9.97296	10.4222	10.8519	8.29547	8.41741	10.1518	9.55319	9.59576	10.8208	P	P	P	P	P	P	P	P	P	P	P	A	hsa_circRNA_100562	hsa_circ_0006577	exonic	chr10	-	16794537	16824083	uc001iok.3	RSU1	TTCTGCCCCCAGAACTAGTTACCTTATCCCATATCACACAACTGGT
ASCRP000945	377.667	259.667	330	207.833	295.167	262.333	614.333	413.167	299	285.5	295.667	470.833	9.15397	9.04313	8.84571	8.25677	8.76564	8.88899	8.00951	7.58504	8.63468	8.33041	8.1345	7.97275	M	P	P	P	P	P	A	P	P	P	P	P	hsa_circRNA_100565	hsa_circ_0017956	exonic	chr10	+	22019828	22024164	uc001iqv.3	MLLT10	GCTCACACCAATCCCCTGTAAGCAGCTTACAGATTCGCTATGATCA
ASCRP000946	71.1667	68.6667	74	70.6667	73	64.5	234	168.167	97.8333	102.167	118.333	134.667	6.22695	6.49335	6.49186	6.31838	6.33541	6.44417	6.72016	6.28273	6.59439	6.42686	6.32019	6.09994	P	A	P	P	P	P	P	P	A	P	A	P	hsa_circRNA_100566	hsa_circ_0017972	exonic	chr10	-	22880557	22880710	uc001irl.4	PIP4K2A	ACATCCTGAAGAAATACCACCAGAATTCCCTGACCAGGAGCGCACC
ASCRP000947	84.6667	71.5	95.1667	68.3333	77.5	68.3333	220.5	148.667	100.5	112.333	116.333	123.667	6.56836	6.58962	6.92518	6.25427	6.53777	6.55362	6.6329	6.11068	6.61947	6.60652	6.27007	5.95716	P	P	P	P	M	P	P	P	P	P	P	P	hsa_circRNA_100568	hsa_circ_0017979	exonic	chr10	-	24880815	24883968	uc001isb.2	ARHGAP21	CATCCAGCACATTCACGATTTGCCTGAACATCATTATGAAACACTT
ASCRP000949	348.167	346.667	408.333	344.667	418.833	276	1589.5	1134.33	435.667	380.333	424.5	899.333	9.04551	9.53848	9.17405	9.15331	9.26618	8.95877	9.5898	9.07929	9.23541	8.86867	8.76418	8.85291	P	P	P	P	P	P	P	P	P	P	P	P	hsa_circRNA_100570	hsa_circ_0001963	exonic	chr10	+	26994214	26998697	uc001isv.3	PDSS1	ATAACAACTCCCGGTTTCATCACACAACCCCAGACAGTAAAACACA
ASCRP000950	2682.83	1748.83	1289.5	2512.5	4909.67	1924.33	1464.83	977.667	890.5	719	837	8083	11.8013	11.9024	10.9589	11.9696	12.2247	11.3657	9.4172	8.87895	10.48	9.97876	9.89359	11.1804	A	P	P	P	P	P	P	P	P	P	P	P	hsa_circRNA_100571	hsa_circ_0018004	exonic	chr10	+	27024168	27024508	uc001isv.3	PDSS1	TGTTTGCCTGTCAGCAGGTCTCTGTTCTAGGATGTCCCGACCCAGT
ASCRP000958	272.5	234	275	223	354.333	182.167	411.833	707	301.167	353	354.333	1087.5	8.66204	8.8676	8.58776	8.47771	9.01622	8.32004	7.43993	8.37243	8.63847	8.71689	8.48931	9.08322	M	P	P	P	P	M	P	P	P	P	P	M	hsa_circRNA_100579	hsa_circ_0007503	exonic	chr10	+	28872327	28884970	uc001iuh.3	WAC	GAAAGAAAAGGGACCAGTTACTCTCCACAAGAAAATTCACACAACC
ASCRP000959	65.5	47.1667	58.3333	50.1667	57.8333	50.6667	126.5	131.333	83	94.3333	109.167	107.333	6.03949	5.60093	6.07324	5.73402	5.89141	5.84187	5.97307	5.95228	6.14233	6.2379	6.13079	5.74883	A	A	A	A	A	A	P	P	A	P	A	P	hsa_circRNA_100580	hsa_circ_0018069	exonic	chr10	-	30315031	30318795	uc001iuz.3	KIAA1462	AGAAGAGCATGGATCAAGACTTCTGGTGCCCAGGTTTTGTAATCAA
ASCRP000961	157.5	108.667	91	165.167	196.167	94.3333	501.333	1146.17	131.5	119.333	259	942.333	7.74345	7.49922	6.85655	7.86428	8.15053	7.18881	7.72336	9.09462	7.2645	6.75382	7.9197	8.91352	P	P	M	P	P	P	M	A	P	P	P	P	hsa_circRNA_100583	hsa_circ_0000231	exonic	chr10	-	32197099	32199491	uc001ivz.1	ARHGAP12	ACAGATAAGGGTTTAAATGTGATACTGGTGTAGATCTCCTTGTTCT
ASCRP000963	58.3333	58	61.1667	54	58.1667	53	107	114	86.6667	97	104.5	113.5	5.83913	6.08533	6.12654	5.87656	5.97825	5.88575	5.79491	5.80546	6.22406	6.29846	6.08483	5.83429	A	A	A	A	A	A	P	P	P	P	P	P	hsa_circRNA_100585	hsa_circ_0018203	exonic	chr10	+	35805450	35805551	uc001iyv.4	CCNY	CTCAAGTATACAATTAAATGCATCCTCCAGGACAAATAGCAAGGAA
ASCRP000964	917.333	554.667	970.833	655.667	958.667	856.667	1685.17	1585	821.167	942.833	1059.5	2034.5	10.4565	10.2848	10.4112	10.2036	10.3718	10.3027	9.69035	9.68488	10.3029	10.5074	10.3785	9.79727	P	P	P	P	P	P	P	P	P	P	P	P	hsa_circRNA_100587	hsa_circ_0000235	exonic	chr10	+	35805450	35819171	uc001iyv.4	CCNY	TGCCATCGTCACCCTGCATCCTCCAGGACAAATAGCAAGGAAATAC
ASCRP000965	70.3333	73.1667	91.3333	66.1667	60	58.8333	135.667	152.167	73	81.3333	95	101.667	6.17951	6.64586	6.81959	6.18709	6.05427	6.1669	6.04786	6.13579	5.69266	5.91798	5.77788	5.65289	A	A	P	P	P	A	P	P	A	A	A	A	hsa_circRNA_100588	hsa_circ_0018293	exonic	chr10	-	47164293	47166311	uc010qfs.2	ANXA8L2	CTGCTGAGAGGGCTTAGGAACCAAGGAGGGTGTCATCATTGAGATC
ASCRP000969	689	466	563.167	599.833	590	590.333	1301.5	1400.83	521	551.833	635.333	1669.17	10.0028	9.98032	9.50564	10.0534	9.74035	9.87341	9.22068	9.4652	9.51188	9.46781	9.47056	9.60396	P	P	P	P	P	P	P	P	P	P	P	P	hsa_circRNA_100593	hsa_circ_0002224	exonic	chr10	+	51374369	51387763	uc001jin.3	TIMM23	GTTGTATAAATGTACAGTAACTGGTATGAACCCTCTGTCTCCTTAT
ASCRP000975	78.5	60.1667	103.333	72.3333	90	77.5	247	242.833	125.5	147.333	165	181.333	6.43797	6.25401	7.06998	6.37531	6.79063	6.85358	6.79798	6.79373	7.15685	7.197	7.03119	6.57253	P	A	P	P	P	P	P	A	P	P	A	P	hsa_circRNA_100600	hsa_circ_0018478	exonic	chr10	-	69714351	69773943	uc001jnf.4	HERC4	TTTCTGATAAGGCAGCACACTTCTGCTTTTGTTCCTTCATCAGGAC
ASCRP000976	82.1667	63.5	78.5	70.1667	73.5	68.8333	236.5	252.333	96.3333	118.333	140.333	184.333	6.51486	6.29473	6.59557	6.3344	6.41168	6.58704	6.73885	6.83468	6.56191	6.72914	6.71141	6.61114	P	A	P	P	P	P	P	P	P	P	P	A	hsa_circRNA_100601	hsa_circ_0007113	exonic	chr10	-	69785302	69804320	uc001jnf.4	HERC4	CTTGTGGACGAGCAGGTTGTTGCCCTGGATGCCCAAAATATTGTAG
ASCRP000979	3218.83	936	1828	982.167	4024.17	3014	3490.67	1040.67	927.833	677.333	1084.83	15552	12.0107	11.0577	11.4846	10.7711	12.0467	11.8706	11.1148	8.95631	10.5442	9.8316	10.4001	12.0603	P	P	A	P	P	P	M	P	P	M	P	M	hsa_circRNA_100604	hsa_circ_0009172	exonic	chr10	-	70218860	70229920	uc001jog.2	DNA2	CAGCTCTCTCTATTTCAGAAGAAAGTGGTAGCTTCCTTTCCAAGAA
ASCRP000980	63	49.3333	54.3333	52.3333	52	52	108	111	76	87	100.667	123.5	6.05655	5.70749	5.92202	5.85087	5.79933	5.87216	5.79404	5.73315	5.83856	6.01367	5.94054	5.95929	A	A	A	A	A	A	P	P	A	P	A	P	hsa_circRNA_100605	hsa_circ_0006151	exonic	chr10	-	70227879	70229920	uc001jog.2	DNA2	GAAACTTTTAGGATTTCAGAAGAAAGTGGTAGCTTCCTTTCCAAGA
ASCRP000981	130.5	94.5	94.5	139.5	119.5	83.6667	1035.5	1241.17	113.667	157.667	221.667	377.333	7.39556	7.20235	6.91603	7.57195	7.28497	6.94206	8.81344	9.24276	6.94832	7.32029	7.60116	7.69252	P	P	P	P	P	P	P	P	P	P	P	P	hsa_circRNA_100606	hsa_circ_0018529	exonic	chr10	-	70246900	70248386	uc001joi.3	SLC25A16	CCGGAATTTGAAAAGTGCCTGTGTTTCATTTTTTACTTTTGGTACC
ASCRP000984	66.3333	62.1667	72	59.3333	62.6667	59.3333	208	231.833	83	97	113.833	149.5	6.09921	6.29011	6.47163	6.03468	6.07112	6.26709	6.56942	6.72103	6.13885	6.25944	6.24326	6.25944	A	A	A	P	A	A	P	P	P	P	P	P	hsa_circRNA_100609	hsa_circ_0007778	exonic	chr10	-	70246900	70266475	uc001joi.3	SLC25A16	GAAAAGTGCCTGAGTATTTTCTGCATTGCGTGCTGTTCCTCAAAAA
ASCRP000985	74	57.3333	64.6667	81.5	79.3333	62.8333	137.833	162.5	93	111.5	126.333	161	6.3169	6.13133	6.27122	6.60845	6.53694	6.32954	6.0557	6.2386	6.45376	6.57571	6.50082	6.36305	P	A	A	P	P	A	P	P	P	P	P	P	hsa_circRNA_100610	hsa_circ_0006272	exonic	chr10	+	70497601	70502326	uc001jol.1	CCAR1	TTTCAGCTTAGCAATATTCACAACCTCAGCAGGCCCTGTATAGTGT
ASCRP000986	72.1667	51.8333	68.1667	70.1667	69.6667	70.3333	119	147.5	97.1667	106.833	118.667	147.5	6.2504	5.9471	6.39154	6.34234	6.31514	6.60791	5.90154	6.11763	6.56056	6.51714	6.33985	6.23845	A	A	A	P	P	P	P	P	P	A	P	P	hsa_circRNA_100611	hsa_circ_0018550	exonic	chr10	+	70500385	70502326	uc010qja.1	CCAR1	GAAGATGTATTCTTTCAGCTTAGTTACAGCAACCCCAGCAAACCCT
ASCRP000987	98.3333	85.5	139.833	84.6667	106.667	98.6667	261	197.833	144.167	160.667	165.333	165	6.85723	7.001	7.57908	6.64738	7.10325	7.30723	6.86364	6.50015	7.42662	7.36086	7.05105	6.41423	P	A	P	P	P	P	P	A	P	A	P	P	hsa_circRNA_100612	hsa_circ_0008523	exonic	chr10	+	70723046	70726959	uc001jov.1	DDX21	TACAAGAAAGGCCGAGGAGTGACCTTCCTATTTCCTATACAAGCAA
ASCRP000988	79.6667	65.6667	68.8333	71.6667	72.8333	73	155.833	164.833	94.3333	102.5	108.5	119.667	6.46654	6.45905	6.40199	6.36737	6.38784	6.66554	6.21139	6.23543	6.52025	6.46839	6.1307	5.94977	P	A	A	P	P	P	P	A	A	P	A	M	hsa_circRNA_100613	hsa_circ_0018611	exonic	chr10	+	70958127	70962799	uc010qjd.1	SUPV3L1	TTCACTGTTACAGGTTCGAGACTATAAGAGGCTTACCCCCATTTCT
ASCRP000989	74	59.1667	62.8333	63.3333	67.5	62	127.167	138.167	90.6667	109.333	123	130.667	6.31737	6.08597	6.21891	6.10502	6.27594	6.35672	5.97951	6.03572	6.36904	6.54588	6.39469	6.07014	P	A	A	P	P	A	P	P	P	P	A	P	hsa_circRNA_100614	hsa_circ_0018652	exonic	chr10	-	71977567	71978573	uc001jqv.1	PPA1	ATATATCTGGAACTATGGTGCCATCCCTCAGGATGTGTTTCACATG
ASCRP000990	184	133	118	179.167	159.833	134.5	811.333	755	148.333	200.167	256.167	775.167	8.00983	7.91123	7.29678	8.01078	7.7886	7.82063	8.42536	8.4796	7.4693	7.75036	7.88251	8.64496	P	P	M	P	M	P	A	P	P	P	P	P	hsa_circRNA_100615	hsa_circ_0018659	exonic	chr10	+	72285678	72291210	uc001jrd.4	KIAA1274	CCGGAAAGAGGTCTGGGGTCCTGAGGCTGCTGGCAGACTATGGGTA
ASCRP000991	77.5	64.6667	74.3333	64.5	65	58.3333	274.667	127.667	171.833	144	142.833	156	6.41946	6.45867	6.56633	6.18187	6.13536	6.10853	6.91977	5.87802	7.71533	7.13279	6.73389	6.31013	P	A	P	P	P	A	P	M	P	P	P	M	hsa_circRNA_100616	hsa_circ_0004606	exonic	chr10	+	72462067	72468534	uc001jrg.3	ADAMTS14	TCATGAATATCGCGGGCCTCATCCGCACAGACAGCACCGACTTCTT
ASCRP000992	65.6667	44.1667	47.5	59.6667	56.8333	61.6667	111.833	120.833	75.6667	77.6667	97.5	142.167	6.09548	5.49472	5.62095	6.00883	5.85609	6.3	5.83227	5.83348	5.82905	5.69093	5.85651	6.17557	A	A	A	P	A	A	P	M	A	A	A	P	hsa_circRNA_100617	hsa_circ_0018736	exonic	chr10	-	73956568	73963282	uc001jsr.2	ASCC1	GTGCTCCATGGCATATAGTTGGAAAGAGAGGGGACACTAGGAAGAA
ASCRP000994	769	633.833	857	681	886.333	684.167	1503.33	2235.67	738	1128.5	1110.67	2532.67	10.1692	10.5311	10.1532	10.2879	10.2836	10.0535	9.46351	10.3814	10.0992	10.8463	10.4503	10.0055	P	P	A	P	P	P	P	P	P	P	P	P	hsa_circRNA_100620	hsa_circ_0006276	exonic	chr10	-	75156276	75160615	uc009xre.3	ANXA7	TTACCCTAGTCAGAATGTCATACCCAGGCTATCCCCCAACAGGCTA
ASCRP000995	79.3333	74.6667	62.6667	84	75.6667	70.3333	302	287.5	89.3333	98.3333	113.333	174.167	6.49889	6.7619	6.21626	6.65323	6.43183	6.59744	7.05214	7.03348	6.32121	6.36823	6.26023	6.49546	P	M	A	P	P	P	P	P	P	P	P	P	hsa_circRNA_100621	hsa_circ_0018814	exonic	chr10	-	75214169	75239275	uc001jue.3	PPP3CB	TGAACTAATGACTGAAGGTGAAGACCAGTTTGATGCTGTCCCTTTC
ASCRP000997	858.667	589.833	1171	660.333	1412.33	1549.83	1579.33	1023.17	785.5	1016.83	1091	9263	10.3661	10.3773	10.79	10.2291	10.8312	11.1514	9.5742	8.93571	10.2191	10.6713	10.4307	11.3883	P	P	P	P	P	P	P	P	P	P	P	P	hsa_circRNA_100623	hsa_circ_0018824	exonic	chr10	-	75302560	75302889	uc001jun.3	USP54	ATTATATCTCCACCACTTCCCTTTGGAAAACCTCCTGATGAGAATT
ASCRP000998	70.6667	56	67	61.6667	66.5	63.3333	168.167	161	88.3333	101.833	116.833	159.167	6.17866	6.10218	6.37819	6.10432	6.21133	6.33779	6.28961	6.22323	6.30439	6.4089	6.28703	6.34961	A	A	A	P	P	A	P	A	P	P	P	P	hsa_circRNA_100624	hsa_circ_0018838	exonic	chr10	-	75439828	75456921	uc001juu.4	AGAP5	ATATCACACAAAGCTTTGGAGTTTAGCCTTTCTGCCAATCCAGAGG
ASCRP000999	100.333	83.3333	92.3333	99.3333	103.667	75.1667	271	304	105.667	141.333	169.333	247.167	6.86297	6.93964	6.90769	6.93021	7.07899	6.73377	6.90668	7.10618	6.75829	7.04399	7.08385	7.07079	P	P	P	P	P	P	P	P	A	M	P	P	hsa_circRNA_100625	hsa_circ_0018845	exonic	chr10	-	75464743	75481262	uc001juu.4	AGAP5	AAGTCAGGGAGCTTAAGGTTGCCAAGCTGTTCTGCCTTTCTGGAAT
ASCRP001000	87.3333	75.1667	83.1667	82	86.3333	68.8333	197.833	242.167	102.333	115.333	139.667	199.667	6.61665	6.72366	6.74755	6.6049	6.71726	6.52758	6.49796	6.79825	6.67601	6.6652	6.71586	6.72546	P	P	P	P	P	A	P	P	P	P	P	P	hsa_circRNA_100626	hsa_circ_0018848	exonic	chr10	-	75472961	75481262	uc001juu.4	AGAP5	AAGGCAGCAAAGTATTAGTTGCCAAGCTGTTCTGCCTTTCTGGAAT
ASCRP001003	65.3333	60.6667	63.6667	62.3333	66	54.3333	160.333	172	89.3333	97.8333	105	135.167	6.05522	6.18278	6.21277	6.14624	6.17444	5.98109	6.23494	6.31844	6.30189	6.18795	6.0395	6.12254	A	A	A	P	P	A	P	P	P	M	A	P	hsa_circRNA_100629	hsa_circ_0005164	exonic	chr10	+	76598440	76603236	uc001jwm.1	KAT6B	GAAAGACCAGATTTGCCTGAAGACCTGGATAATCTCCATTTTTGTC
ASCRP001004	70.3333	67.3333	58.1667	67.3333	68.3333	53.3333	119.167	168.167	89.3333	94.5	109.167	173.667	6.2437	6.46255	6.07948	6.21206	6.25999	6.02522	5.90521	6.28802	6.31416	6.22219	6.19892	6.51312	A	A	A	P	A	A	P	P	P	P	P	P	hsa_circRNA_100630	hsa_circ_0005235	exonic	chr10	+	76602357	76603236	uc001jwm.1	KAT6B	GAAAGACCAGGTCTTGATTTCCCAGTTAAAGATGTTCTTCACCCGA
ASCRP001005	155.167	159	115.667	116.833	103.833	105.667	169.167	178.167	3508.33	211	130.167	179.333	7.71377	8.24699	7.28076	7.24744	7.05021	7.42039	6.30375	6.3443	12.6773	7.83679	6.51511	6.52355	P	P	P	P	P	P	P	M	P	P	M	P	hsa_circRNA_100631	hsa_circ_0006148	exonic	chr10	+	76910271	76910864	uc001jwx.2	SAMD8	TCTTAGACAGGCAGCGGAGGAGGAAATGGCAGGTCCTAATCAACTC
ASCRP001006	168.5	143.667	123	113.167	113.5	123.5	172.833	174.333	4058.33	222.167	132.833	178.167	7.87168	8.08253	7.37366	7.20184	7.24205	7.70528	6.33804	6.32154	12.8699	7.93969	6.56069	6.54135	P	A	P	P	P	P	P	P	P	A	P	P	hsa_circRNA_100632	hsa_circ_0018905	exonic	chr10	+	76910271	76928416	uc001jwx.2	SAMD8	TACTGGAAAGGCAGCGGAGGAGGAAATGGCAGGTCCTAATCAACTC
ASCRP001007	273.667	204.833	3294.5	270.833	500	489.333	854.333	711	1089.67	582.5	881.833	555.333	8.68569	8.67186	12.2644	8.76142	9.53087	9.63465	8.52098	8.38172	10.7938	9.54374	10.023	8.23231	P	P	P	P	P	P	P	P	P	P	P	P	hsa_circRNA_100633	hsa_circ_0018909	exonic	chr10	+	76970891	76982160	uc010qle.2	VDAC2	AAATATCAGTTGGATCCCACTGCTTCCATTTCTATTCCCCTCTTCC
ASCRP001008	212.333	161.333	192.167	187	208.667	129.167	583.333	403.667	163.333	167.833	184	256.833	8.24717	8.27532	8.04508	8.11435	8.25914	7.77694	7.93806	7.54912	7.60211	7.45857	7.23078	7.16164	P	P	P	P	P	P	P	P	P	P	P	P	hsa_circRNA_100634	hsa_circ_0006649	exonic	chr10	-	79613111	79614128	uc001jzk.3	DLG5	GCAGCAGCAGGCCCTACCACAGGCTGAATCCTGACTATGAGAGGCT
ASCRP001009	97.3333	77.3333	82.3333	95.1667	85.6667	82.8333	619.167	796.333	117.167	137	181.167	269.833	6.8289	6.78127	6.71553	6.85541	6.70724	6.94926	8.02403	8.55548	7.00587	7.07725	7.20725	7.23936	P	P	P	P	P	P	P	M	P	P	P	P	hsa_circRNA_100635	hsa_circ_0008856	exonic	chr10	+	82266983	82269227	uc001kci.4	TSPAN14	TTCAGAAAGCTGGTGTGCTGTCCGACCTCACCAAAGTGACCCGGAT
ASCRP001011	343.833	93.8333	455.833	109.167	170.167	136.833	295.5	173.667	266.333	284.667	171.833	212.5	9.02628	7.16838	9.27178	7.08897	7.89862	7.87713	7.01385	6.31776	8.45216	8.30313	7.10761	6.85421	P	P	A	P	P	P	P	P	P	A	P	P	hsa_circRNA_100637	hsa_circ_0006956	exonic	chr10	+	86177526	86185649	uc001kdh.1	FAM190B	CACTATCATCACCATGGAAAAAGTGACTTGAGCAGGATATTTTGAA
ASCRP001014	477.833	342.333	619	346.5	438.167	321.5	1219.17	621.167	498.333	516	451.5	698.5	9.49161	9.51691	9.62225	9.16377	9.33708	9.12934	9.11917	8.19872	9.45114	9.37384	8.87754	8.49943	P	P	P	A	P	M	P	P	P	P	P	A	hsa_circRNA_100640	hsa_circ_0002727	exonic	chr10	-	88230748	88233730	uc001kdn.3	WAPAL	AGCACCATCAGTCACCCACAAAAGCTGTATATAATGCCAGACATTG
ASCRP001015	287.667	198.667	322.333	232.833	282.333	223	2795.17	1176.17	584.333	744	831	1783.83	8.76107	8.62208	8.80639	8.55152	8.74033	8.63583	10.4706	9.14279	9.703	10.043	9.88776	9.67948	M	P	P	P	P	P	A	P	P	P	P	P	hsa_circRNA_100641	hsa_circ_0019054	exonic	chr10	-	89536077	89544427	uc009xth.1	ATAD1	CAGCTGCCAGGTGTTCTTCTCTATGGGCCTCCAGGCTGTGGTAAAA
ASCRP001018	71	59.5	83.8333	69.1667	77.1667	71.1667	180	208.167	104.333	129.5	128.5	135.333	6.20536	6.1762	6.72737	6.30027	6.50563	6.65667	6.38248	6.54791	6.72057	6.91379	6.54309	6.07899	P	A	A	P	P	P	P	P	M	M	P	P	hsa_circRNA_100644	hsa_circ_0019083	exonic	chr10	-	92508595	92509351	uc001kgz.3	HTR7	AGTTTGTGCTGTACCTTGGGATCACAAGGCCCCTCACATACCCTGT
ASCRP001020	3546.67	1733.33	4431	2511.83	5287.83	4041.17	7313.17	4570.67	2767.5	3428	4254.5	27263.3	12.1956	11.892	12.7161	11.9734	12.3152	12.2261	12.6935	11.9925	12.1542	12.7228	12.5592	12.9064	P	P	P	P	P	P	P	P	P	P	P	P	hsa_circRNA_100646	hsa_circ_0002435	exonic	chr10	-	93902785	93904869	uc001khu.2	CPEB3	ATTTTCCTCCTAAAGGTCGATCTTCTCTCTTTCCCTTTGAAGATGC
ASCRP001025	63.3333	52.3333	66.1667	52.8333	64.3333	59.6667	126.333	150.5	84.5	97.1667	108.667	116.333	6.00113	5.82314	6.32379	5.8259	6.14671	6.2608	5.95916	6.13095	6.14074	6.27951	6.12745	5.8546	A	A	A	A	P	A	A	P	P	P	P	P	hsa_circRNA_100651	hsa_circ_0005691	exonic	chr10	+	96267023	96271411	uc001kjr.2	TBC1D12	GCCTGATGTTGGTTATAACTTTATGAAATCTTCCTCTCAAGAGCAA
ASCRP001028	63.3333	58	60.3333	63	56.3333	51.3333	96.3333	112.167	71	79.5	101	122	6.00885	6.11377	6.11942	6.14785	5.82876	5.75163	5.67855	5.73426	5.59768	5.7876	5.94345	5.95036	A	A	A	P	A	A	P	P	A	A	A	M	hsa_circRNA_100654	hsa_circ_0008102	exonic	chr10	+	98703869	98711953	uc001kmr.3	LCOR	ACTCAAGGGAACGGGGACACTTAGTCGGTCTGGATGAACCAGCTTC
ASCRP001029	234.167	218.167	198.5	249	229.667	215.667	597.167	808	314.5	314.5	375.667	734.167	8.42126	8.75573	8.09562	8.63716	8.42317	8.56989	7.96819	8.59158	8.71715	8.50007	8.57319	8.57238	A	P	P	P	P	P	P	P	P	P	P	P	hsa_circRNA_100655	hsa_circ_0006371	exonic	chr10	+	98708764	98711953	uc001kmr.3	LCOR	AGTACTCAAGGGAACGGACAGTCCCTGGGTCTCCGACCCCAATATT
ASCRP001030	76.6667	61.1667	55.5	76.6667	78	58.5	193	157.833	83.6667	90.6667	120.833	132.5	6.35464	6.24518	5.95427	6.50339	6.52102	6.21463	6.47402	6.20463	6.16495	6.16441	6.38187	6.06196	P	A	A	P	P	A	P	P	P	P	P	P	hsa_circRNA_100656	hsa_circ_0004896	exonic	chr10	-	99196947	99197507	uc009xvp.1	EXOSC1	AGTGAGTCAGGTTGAAATTTATAAGAGTTTCCGCCCAGGTGACATT
ASCRP001031	53.5	46.8333	55.1667	51.3333	76.8333	51.6667	104.667	116.5	79	90.6667	102.667	106.333	5.70548	5.54103	5.97155	5.82538	6.4867	5.87826	5.75935	5.80638	5.8978	6.08541	6.03062	5.75571	A	A	A	A	P	A	M	P	A	P	P	A	hsa_circRNA_100657	hsa_circ_0006520	exonic	chr10	-	99236439	99238146	uc009xvt.3	MMS19	ATCGATTTTACCCCTTGGTACACCTGATACTGTTCTATGAGAACCG
ASCRP001033	65.1667	52.1667	77.5	58.5	68.8333	59.5	257.167	261.833	94.1667	119.833	144.167	166.333	6.03681	5.85971	6.62415	5.99286	6.28742	6.27608	6.84763	6.89172	6.48528	6.7461	6.77318	6.43098	A	A	P	P	P	A	P	M	P	P	P	P	hsa_circRNA_100659	hsa_circ_0003168	exonic	chr10	+	99502850	99504672	uc001kok.2	ZFYVE27	TGAAGAGCTTGTGGCAGATGCCTTTGTGTTCCTTGCTGACCTGCCT
ASCRP001034	62	93	53.5	66.6667	58.1667	64.6667	393.167	1290	92.5	100.5	129.167	349.5	5.97978	7.14769	5.88796	6.2433	5.94965	6.41828	7.36854	9.31425	6.48872	6.42271	6.53786	7.58196	A	P	A	P	A	A	P	P	P	P	P	P	hsa_circRNA_100660	hsa_circ_0019390	exonic	chr10	+	99967857	99969656	uc001kow.4	C10orf28	TCTACAAGAGATTGTGGTGGTGCCATGCAGCAAGAATCAGAGAGAT
ASCRP001036	66.3333	57	55.5	68.8333	66	55.3333	144	106	83.6667	92.3333	102.667	110.5	6.0743	5.98762	5.97424	6.2994	6.20679	6.12059	6.09298	5.69854	6.14712	6.13982	5.98136	5.79762	A	A	A	P	P	A	M	P	P	P	A	P	hsa_circRNA_100662	hsa_circ_0006654	exonic	chr10	+	102683731	102685776	uc001krs.3	FAM178A	ACACACAAAGCAGGCTCTAAGCAGAATAAATTCCCTGAAAAAAGAA
ASCRP001038	63.5	61.5	60.6667	69	66.6667	60.3333	130.167	129.833	84.3333	85.6667	104.667	117.167	6.01945	6.2602	6.17131	6.28466	6.2172	6.23366	5.99634	5.94295	6.15563	5.98289	6.01493	5.86379	A	A	A	P	P	A	A	P	M	P	P	P	hsa_circRNA_100664	hsa_circ_0005741	exonic	chr10	-	103384501	103436193	uc001kto.3	FBXW4	AGAATCTGGGACCTCAACAGGATGACCAGTGTCCCAGTGAAGGAAC
ASCRP001039	67.8333	46.3333	52	75.6667	69.3333	53.8333	140.333	156.667	80	88.6667	115.833	127.167	6.15276	5.50974	5.78517	6.42564	6.30299	6.02902	6.08642	6.19828	6.01206	6.04248	6.29238	6.0244	P	A	A	P	P	A	P	P	A	P	A	P	hsa_circRNA_100665	hsa_circ_0019589	exonic	chr10	-	103427642	103433430	uc001kto.3	FBXW4	CATTACTCAGTCAGATGCCCTGGATGCAGCTAGAGGATGATTCTCT
ASCRP001040	68.5	50	56.3333	71.8333	66.6667	56.6667	167.167	178.667	79	89.6667	112.667	134.5	6.19521	5.75129	5.98131	6.35381	6.23378	6.05759	6.29898	6.37115	5.96792	6.10999	6.24229	6.10845	P	A	A	P	P	A	P	P	A	P	P	P	hsa_circRNA_100666	hsa_circ_0019591	exonic	chr10	-	103432671	103433430	uc001kto.3	FBXW4	GACGGCCAAGTCAGATGCCCTGGATGCAGCTAGAGGATGATTCTCT
ASCRP001041	67.8333	57.6667	60.3333	75.5	66	58.3333	160.167	154.667	83	89.5	106.667	129.667	6.10331	6.07125	6.1697	6.45697	6.18336	6.13532	6.215	6.18897	6.03584	6.08018	6.07151	6.03057	A	A	A	P	P	A	M	P	A	P	A	M	hsa_circRNA_100667	hsa_circ_0000255	exonic	chr10	-	103432671	103436193	uc001kto.3	FBXW4	TCCAGGGACAGGACGGCCAAGGATGACCAGTGTCCCAGTGAAGGAA
ASCRP001042	71.8333	52	69.1667	57.3333	66.6667	62.6667	186.333	135.833	92.6667	100.833	118.333	135.667	6.25045	5.85421	6.40883	5.99853	6.2336	6.2885	6.4322	6.00912	6.47861	6.39816	6.32934	6.09824	P	A	A	P	P	A	P	P	P	P	P	A	hsa_circRNA_100668	hsa_circ_0019607	exonic	chr10	-	103552595	103570071	uc001ktv.2	MGEA5	TAAGGATGAGAGCAACTTATGACTCTCATCTCTGCTGCACGAGAAT
ASCRP001043	83.6667	74.5	59.6667	104.833	75.3333	61.3333	219	211.833	82.1667	89.1667	121.667	155.667	6.54084	6.75006	6.16493	7.03581	6.51921	6.34319	6.64728	6.59537	6.12272	6.10135	6.3858	6.32914	P	P	A	P	A	A	A	P	A	P	P	P	hsa_circRNA_100669	hsa_circ_0019612	exonic	chr10	-	103558598	103567658	uc009xwt.2	MGEA5	CTCTGAAAAAGTTTCTCAGTTTGGGTGCAGATCATTTGCTTTGCTT
ASCRP001044	79.3333	66	80.6667	68.1667	79	63.8333	188.667	220	107.667	120.333	125.167	196.333	6.46642	6.42682	6.6858	6.2852	6.565	6.42126	6.43353	6.65418	6.81065	6.74309	6.45448	6.69902	P	A	P	P	A	A	P	P	P	M	A	P	hsa_circRNA_100670	hsa_circ_0019627	exonic	chr10	-	103649168	103699695	uc009xwy.1	C10orf76	TCAGAGGAGCAGTCCTGAGGCTTTCTACCAATGCAGGCCAGTGGAA
ASCRP001045	68	50	57.1667	70.1667	64.8333	51.3333	150.333	148	86.3333	88.3333	128.833	139.833	6.19521	5.71071	6.04116	6.36217	6.16448	5.77957	6.15841	6.1102	6.19445	6.02698	6.53476	6.18131	A	A	A	P	A	A	P	P	M	P	P	P	hsa_circRNA_100671	hsa_circ_0019632	exonic	chr10	-	103716353	103717489	uc009xwx.1	C10orf76	TACTCCATGGCCTTGATAAATTTGCTGAAGTTCCTTATGTCAAATG
ASCRP001048	3346.33	2451.83	3354.33	3734.83	6070.33	5480.17	4196.33	4363.83	4841.5	3406.17	3727.5	17051.3	12.0648	12.3009	12.291	12.5574	12.5727	12.5706	11.6104	11.8753	13.1752	12.7132	12.4598	12.2094	M	P	P	P	P	P	P	P	P	P	P	M	hsa_circRNA_100674	hsa_circ_0000257	exonic	chr10	+	103916775	103917971	uc001kuo.2	NOLC1	TAAAGCTCAGACTAAAGCCCCTCCCAAACCAGACACAGCAGGATGC
ASCRP001049	1311.83	875.333	1402.5	1185.83	1366.67	1071.5	3500.33	4971.33	1326.17	2020.67	2230	6863.83	10.8261	10.9647	11.0901	10.9867	10.8012	10.6351	11.1178	12.1958	11.1953	11.904	11.5013	11.0235	P	P	P	A	P	P	A	P	P	P	P	P	hsa_circRNA_100675	hsa_circ_0003839	exonic	chr10	+	104119940	104120152	uc001kux.2	GBF1	ACTTATTCCAGGCACAGCTTTGGTCCCCTATGGTCTTCCCTGCATC
ASCRP001052	62	52.6667	58.6667	51.1667	54.3333	49.3333	136.667	137.167	87.3333	89.3333	95.3333	137.333	5.91453	5.83109	6.11829	5.77911	5.80604	5.83985	6.05269	6.0136	6.27882	6.10198	5.84398	6.13232	A	A	A	A	A	A	P	P	P	P	A	P	hsa_circRNA_100678	hsa_circ_0019803	exonic	chr10	-	105108472	105108756	uc009xxl.3	PCGF6	AACCTCTTTATAACATAAGCGCCTGATTAATCTCTCTGAGCTGACC
ASCRP001053	416	343.667	410.333	483	603.833	457.333	819.333	362.5	324.333	349.5	425.667	1096.17	9.31349	9.52605	9.18434	9.6636	9.76588	9.53193	8.45703	7.39857	8.75078	8.71249	8.75984	9.09299	A	M	P	P	P	P	M	A	P	P	P	P	hsa_circRNA_100679	hsa_circ_0005620	exonic	chr10	-	105382226	105420872	uc010qqu.1	SH3PXD2A	CACAGCCGAGGTGCCGACGCCACCGCCGAGCCCATGATCCTGGAAC
ASCRP001058	235.167	132.667	277.667	272.167	210	198.167	1080.33	481.333	293.667	326.667	364.833	507.167	8.42535	7.89946	8.60354	8.76443	8.28135	8.44573	8.88532	7.82695	8.60936	8.56936	8.52217	8.11638	P	A	P	P	P	P	P	A	P	P	P	P	hsa_circRNA_100684	hsa_circ_0020048	exonic	chr10	+	114724314	114799885	uc021pyn.1	TCF7L2	ACACATTGTCCTCCATTTTCAGTCCGGCAGCACACATTACTCTGCG
ASCRP001059	2648.67	1559.67	3486	1633	2466.33	1990.67	3249.17	2987.83	2546.33	2674.83	2499.67	4305.33	11.7847	11.7898	12.3689	11.4313	11.4878	11.411	10.9271	10.9476	12.0036	12.4036	11.777	10.5502	P	P	P	P	P	P	P	P	P	P	P	P	hsa_circRNA_100685	hsa_circ_0020080	exonic	chr10	+	116590610	116608496	uc001lcb.3	FAM160B1	TCATAGGCAGCTTGCACCTTCTCTTCCTTTACAAGAAGATTTTGTT
ASCRP001061	73.6667	58.3333	74	69.3333	67.3333	62.6667	241.667	289	94.8333	114.667	138	132.167	6.33427	6.12128	6.55365	6.32529	6.20617	6.3694	6.76609	7.05513	6.52349	6.64847	6.66804	6.06283	A	A	P	P	P	A	P	P	P	P	P	P	hsa_circRNA_100687	hsa_circ_0020095	exonic	chr10	+	116975454	117075246	uc001lcg.3	ATRNL1	ATCCAGTGTCCAGCATCAAACACTTGGCTTGTTCCAGAAACTAAAG
ASCRP001062	96.5	81	135.167	74.6667	96	81.8333	230.5	230.833	147.833	158.333	183.833	150.333	6.78278	6.8959	7.52465	6.41529	6.92158	6.96571	6.70219	6.70964	7.44576	7.34296	7.25214	6.26083	P	P	P	A	P	P	P	P	P	P	P	P	hsa_circRNA_100688	hsa_circ_0020097	exonic	chr10	+	117221450	117278834	uc001lcg.3	ATRNL1	ACCTTCTTCAGACAGCCTTTTGATTGATTATCAATTTACCTTCAGC
ASCRP001065	446.833	286.333	314.833	501	440.667	413.167	1011.67	551.667	481	392.333	469.167	1271.67	9.41158	9.23011	8.78019	9.72287	9.3325	9.41666	8.77575	8.03879	9.40625	8.91497	8.96303	9.25002	P	P	P	P	P	P	P	P	P	P	P	P	hsa_circRNA_100691	hsa_circ_0020117	exonic	chr10	-	118464661	118466796	uc001lcu.3	HSPA12A	AATGCATCCATGTGATGAGAAACGGCTCCCACATCTGCATATTCAT
ASCRP001067	83	64.8333	98.1667	73.6667	77.1667	77.1667	303.333	300.333	105	152.333	162.167	195.833	6.5547	6.41628	6.99393	6.4304	6.48094	6.76537	7.05074	7.0889	6.75863	7.26184	7.00853	6.69022	P	A	P	A	P	M	P	M	P	P	P	P	hsa_circRNA_100693	hsa_circ_0020174	exonic	chr10	-	120931893	120934104	uc001lec.3	PRDX3	GAAGGTTCTGGTCTTGCACTAAGGTTCCTCATGCCATGCACCTGCT
ASCRP001069	91.3333	76.6667	75.5	82.1667	84	60	736.5	319.5	100.833	143.667	137.333	175.167	6.73726	6.77514	6.56516	6.59371	6.71087	6.30351	8.28408	7.20105	6.65737	7.13313	6.67328	6.52503	P	P	A	P	P	A	P	P	P	P	P	P	hsa_circRNA_100695	hsa_circ_0005516	exonic	chr10	-	121275020	121286936	uc001lef.3	RGS10	TTCCAGAAACTCCAGGACCAGACATCCACGACAGCGATGGCAGTTC
ASCRP001070	6347.67	3212.17	8225.83	4417.83	8007.67	6819.83	7629.5	7170.17	4165	5007.67	6829.17	32260.2	12.8733	12.6624	13.4874	12.7828	12.9389	12.829	12.7675	12.8021	12.9049	13.4517	13.3327	13.1381	P	P	P	P	P	P	P	P	P	P	P	M	hsa_circRNA_100696	hsa_circ_0008896	exonic	chr10	+	122273422	122280607	uc001ley.1	PPAPDC1A	CATTCCTCCTGCAATTTCTTTCCTCACACCCCTGGCTGTTATTTGT
ASCRP001071	71.6667	60.6667	68.1667	55.8333	64.5	60.5	953.667	135.333	113.833	108.333	117.667	148.833	6.27822	6.21121	6.36624	5.94274	6.11233	6.26803	8.67482	5.97451	6.92565	6.54753	6.34921	6.2457	P	A	A	P	P	A	P	A	P	P	P	P	hsa_circRNA_100697	hsa_circ_0020246	exonic	chr10	-	123600596	123683844	uc001lfp.3	ATE1	GCGTCTACTCTGCACTACGGCATGTGGGCACATTCCATGACAGTAC
ASCRP001076	53.5	47.6667	54.5	48.1667	52.5	48.5	111.167	120.667	75.5	82.3333	98.5	122.333	5.69454	5.56578	5.94335	5.72958	5.74219	5.65524	5.82899	5.86503	5.70665	5.92925	5.90987	5.96325	A	A	A	A	A	A	P	P	A	P	A	P	hsa_circRNA_100702	hsa_circ_0020255	exonic	chr10	-	123681863	123683844	uc001lfp.3	ATE1	AACATGTTGTCCTCAGTACACAATAAGGCATGTGGGCACATTCCAT
ASCRP001080	158	133	217	161.667	150.5	134.333	272	174.5	132.167	141.5	159	214.167	7.72162	7.91212	8.23447	7.8397	7.69033	7.82917	6.90875	6.34156	7.2489	7.10342	6.96528	6.87046	P	P	M	P	P	P	P	P	P	P	P	P	hsa_circRNA_100706	hsa_circ_0003766	exonic	chr10	+	126176990	126186697	uc001lhs.2	LHPP	AGCCCACCAGGAGTCCGCTCAGAATTTGATCAGATCGACACATCCA
ASCRP001081	81.8333	103	62.8333	65.3333	70.6667	62.5	185.333	157.333	87.3333	93.1667	98.6667	115	6.50356	7.3583	6.22025	6.17998	6.30475	6.36104	6.40343	6.21019	6.26896	6.19591	5.91535	5.85574	P	M	A	P	M	A	M	P	P	P	A	A	hsa_circRNA_100707	hsa_circ_0020313	exonic	chr10	+	126185529	126186697	uc001lhs.2	LHPP	AGCCCACCAGGCGTTACTACAAGGAGACCTCTGGCCTGATGCTGGA
ASCRP001082	57.3333	52.1667	52.6667	61.1667	56	56.3333	110.833	118.333	74	79	103.833	125.333	5.86124	5.80325	5.92364	6.09671	5.88695	6.13039	5.81141	5.82743	5.71824	5.68692	6.06798	6.00462	A	A	A	P	A	A	M	P	A	A	A	P	hsa_circRNA_100708	hsa_circ_0000267	exonic	chr10	-	126370175	126370948	uc001lhu.1	FAM53B	CAAGATGGCACAGAAAATGACAGATGGCGAGACCTGGACAGGAAAT
ASCRP001083	136.167	87	111.667	94.8333	84.3333	66.5	216.667	136.167	104.833	116.667	120	135.833	7.46751	7.06262	7.23941	6.84612	6.63552	6.5448	6.62009	6.03057	6.73206	6.66245	6.38976	6.15328	P	P	P	P	P	P	A	P	P	P	P	P	hsa_circRNA_100709	hsa_circ_0003570	exonic	chr10	-	126370175	126384781	uc001lhu.1	FAM53B	GATGGCACAGCACACGCCAAAGAAGATGAGTCAAGGACCTACACTT
ASCRP001087	112.833	71.6667	133	88	97.5	85.6667	315	253.667	135.333	175.833	181	180.667	7.15327	6.61457	7.51749	6.76189	6.93847	7.02251	7.09307	6.87019	7.25196	7.54471	7.2251	6.57661	P	A	P	P	P	P	P	P	M	P	P	P	hsa_circRNA_100713	hsa_circ_0008915	exonic	chr10	+	126631025	126655350	uc010qug.2	ZRANB1	AGCAATATTGCTTACAGAGCTTCCTGCCTGACACAGCTCACTTCAA
ASCRP001088	186.833	121.333	269.833	144.667	176.833	166.333	641	594.333	231	358	378.333	360.5	8.02823	7.71806	8.56618	7.61938	7.98434	8.17691	8.07685	8.13271	8.23946	8.74974	8.59234	7.63435	P	P	P	P	P	A	M	P	P	P	P	P	hsa_circRNA_100714	hsa_circ_0020336	exonic	chr10	+	126631025	126662967	uc010qug.2	ZRANB1	TGCATGACTGTTCACATTGCTTCCTGCCTGACACAGCTCACTTCAA
ASCRP001089	63.5	52.8333	51.6667	57.1667	62	58.5	111.333	136.667	79.1667	100.667	122.833	215.667	6.0409	5.88268	5.89282	5.97707	6.12095	6.24111	5.84766	6.01267	5.88038	6.3036	6.45832	6.8578	A	A	A	P	A	A	P	P	A	M	P	P	hsa_circRNA_100715	hsa_circ_0020353	exonic	chr10	-	126727565	126727724	uc001lif.4	CTBP2	ATTTGTGAAGGGTTCATAGTGGCGTCATGCACGCAGACTCCTGCAA
ASCRP001092	64	56.6667	54.1667	62.3333	70.5	53.1667	170.667	175.833	76.6667	82.6667	108.667	206	6.05409	6.05322	5.97454	6.13299	6.34688	5.88988	6.30889	6.33277	5.92357	5.86821	6.21909	6.79086	A	A	A	P	P	A	P	M	A	A	M	P	hsa_circRNA_100718	hsa_circ_0002669	exonic	chr10	+	128768965	128798571	uc010qun.2	DOCK1	CCTTTTGGAGTGGCTGCTTTTTATAACTATGATGCCAGAGGAGCGG
ASCRP001093	285.333	344.333	121	227	137.333	96.6667	2459	2950.5	152.667	169.833	397.667	909	8.76442	9.51907	7.37787	8.49857	7.55508	7.21216	10.3762	10.9249	7.50511	7.46424	8.66557	8.86794	P	P	P	P	P	P	P	P	P	P	P	P	hsa_circRNA_100719	hsa_circ_0020390	exonic	chr10	+	128768965	128836080	uc010qun.2	DOCK1	GGTGGTGAAGTAGTGAAGCTTTTTATAACTATGATGCCAGAGGAGC
ASCRP001094	174	103.5	103.833	79.6667	97.8333	99.8333	237.167	208.667	99.3333	109.333	150.833	225.333	7.89085	7.41808	7.07601	6.55935	6.94901	7.31475	6.74973	6.5674	6.59834	6.5612	6.85468	6.91999	P	P	P	P	P	P	M	P	P	P	P	P	hsa_circRNA_100720	hsa_circ_0020394	exonic	chr10	+	128768965	128860040	uc010qun.2	DOCK1	CAGACCGTCCGGGTGAAGCTTTTTATAACTATGATGCCAGAGGAGC
ASCRP001095	71.5	56.6667	75	59.3333	73	66.1667	105.333	108.667	92.3333	105.333	111.333	130.667	6.25163	6.08727	6.56882	5.99237	6.36702	6.44484	5.79149	5.69596	6.50158	6.49836	6.14685	6.04711	P	A	A	P	P	A	P	P	P	P	P	P	hsa_circRNA_100721	hsa_circ_0020396	exonic	chr10	+	128768965	128908618	uc010qun.2	DOCK1	ACCTCTTCACACAGCATGCTTTTTATAACTATGATGCCAGAGGAGC
ASCRP001097	64.6667	55.1667	65.1667	53.8333	64.1667	59	148	122.833	87.5	92.6667	114.667	132.667	6.05239	5.99331	6.28769	5.90736	6.15339	6.16137	6.14481	5.85384	6.30321	6.21329	6.26138	6.07899	A	A	A	A	A	A	P	P	P	P	P	P	hsa_circRNA_100723	hsa_circ_0020407	exonic	chr10	+	128768965	129202693	uc010qun.2	DOCK1	CCACATTCCTGCGGCTTTTTATAACTATGATGCCAGAGGAGCGGAT
ASCRP001100	143.333	131.333	141.5	148	138.333	134.167	561.5	343.167	170	178.667	206.167	252.667	7.57369	7.87001	7.60331	7.64958	7.58546	7.81952	7.88644	7.25955	7.68454	7.56136	7.46854	7.1266	P	P	P	P	P	P	P	P	P	P	P	P	hsa_circRNA_100726	hsa_circ_0002456	exonic	chr10	+	128923737	128926028	uc010qun.2	DOCK1	AGATTCTGAACTCATTACTGCAGAGAGATCCTGCTTCCCATGATGA
ASCRP001102	96.5	73.8333	80.3333	69.6667	86.8333	103.333	176.333	147	117.167	112	107	217.333	6.80146	6.67839	6.68533	6.30773	6.72706	7.36905	6.30775	6.0934	6.97531	6.60931	6.10383	6.90233	P	P	P	P	P	P	P	P	P	P	A	P	hsa_circRNA_100728	hsa_circ_0020523	exonic	chr10	+	133757471	133758963	uc001lks.3	PPP2R2D	CACTCCAAGTGTCCCAATATTGAAGCCCATGGATCTTATGGTAGAA
ASCRP001105	94.5	58.3333	75.5	134.833	99.6667	72.3333	151.5	204	101.667	123.833	161.5	329	6.76714	6.12482	6.57417	7.4904	6.97768	6.65755	6.17085	6.54254	6.66172	6.82559	6.97863	7.50384	A	A	P	P	P	P	P	P	P	P	P	P	hsa_circRNA_100731	hsa_circ_0020594	exonic	chr11	-	133583	134947	uc010qvj.2	AL137655	CGAAACGTGAGTGGGAACATCCAGTTGCAGGAAAACAAGCTTAACA
ASCRP001106	110.167	91	145	92.5	104.5	93.3333	434.5	427.167	147.333	239.5	222.667	248.833	7.09906	7.13667	7.63625	6.77199	7.06157	7.18389	7.53254	7.62156	7.44709	8.05851	7.62607	7.10474	P	A	P	P	P	P	P	P	P	P	P	P	hsa_circRNA_100732	hsa_circ_0020597	exonic	chr11	-	141452	141576	uc001lnz.2	AL137655	GGGACTACAGAAACAGGACCTTGCCCTGTCACTCAGGATGGAGTTC
ASCRP001108	125.167	100.333	153.5	106.167	133.167	117.167	376.167	402.5	193	247.667	263.833	344	7.3017	7.33718	7.71927	7.05091	7.51389	7.62217	7.30446	7.53807	7.91218	8.09321	7.95903	7.5636	P	P	P	P	P	P	P	A	P	P	A	P	hsa_circRNA_100734	hsa_circ_0020728	exonic	chr11	+	847200	850367	uc001lsd.1	TSPAN4	ATGTTCGCCTTCAACCTGCTCTTCTGGAGCTTGGGGCTTCCTTGGT
ASCRP001109	82.1667	65.6667	68.6667	67.1667	74.5	70	123.833	142.333	103.333	98	110.333	188.5	6.52079	6.44516	6.3984	6.26062	6.43058	6.5727	5.94352	6.06275	6.70621	6.31304	6.17846	6.62389	P	A	A	P	P	A	P	P	P	P	A	P	hsa_circRNA_100735	hsa_circ_0020749	exonic	chr11	+	1000431	1003804	uc001lss.3	AP2A2	ACTTAAGTCTGAATTTCGGCAGAATTTAGTCTACGCCTTCTCCGTC
ASCRP001110	69.1667	57	60.6667	60.6667	68.6667	61.1667	115.667	106.333	78.8333	85	101.167	162.667	6.16249	6.05278	6.17094	6.05544	6.25	6.27986	5.86116	5.66468	5.90509	5.87733	5.97212	6.38912	A	A	A	P	M	A	M	P	A	A	P	M	hsa_circRNA_100736	hsa_circ_0003379	exonic	chr11	-	1307231	1311639	uc001ltd.3	TOLLIP	CCCATCACAGGCAAAGTTGGCCAAGAATTACGGCATGACCCGCATG
ASCRP001111	842.5	570.833	372	497.5	656	396.333	1185.67	587.333	336.667	315.167	384.833	1466.33	10.3473	10.3351	9.04064	9.71288	9.91661	9.36577	9.06213	8.12038	8.79493	8.50309	8.6164	9.43556	P	P	P	A	P	P	P	P	P	P	P	P	hsa_circRNA_100737	hsa_circ_0008301	exonic	chr11	-	1307231	1317024	uc001ltd.3	TOLLIP	TGTGCCCATCACAGGTGTACATCGGTGAGCTCCCGCAGGACTTCCT
ASCRP001114	129.167	102.167	170.833	111.667	132.333	112.5	451.667	420.5	168.167	215.833	238.667	301.667	7.37914	7.36107	7.858	7.15536	7.51903	7.54179	7.59422	7.61605	7.66617	7.86329	7.74913	7.38733	P	P	P	P	P	P	P	P	P	M	P	P	hsa_circRNA_100740	hsa_circ_0006430	exonic	chr11	-	3712576	3716836	uc001lyg.3	NUP98	ACAGTGACAGGGGATCATCGTCTTGCTCTTCTTTTATCTCAGTTTG
ASCRP001119	169.167	184.333	254	190.667	190.667	150.167	604.833	211.5	187.5	189.167	211.167	267.333	7.87267	8.49617	8.47278	8.13953	8.08497	8.01043	7.98555	6.57562	7.86086	7.66298	7.49752	7.17174	P	P	P	P	P	P	P	P	A	P	A	P	hsa_circRNA_100745	hsa_circ_0007401	exonic	chr11	-	3789810	3797251	uc001lyh.3	NUP98	AGCACCAACACCATGATTTTGGAACCAGTACTAGCAGTGGAGGACT
ASCRP001122	165	246.167	131.5	432.167	212.167	118.667	833.333	2259.5	198	236.167	308.833	615.667	7.84688	8.96081	7.47123	9.51786	8.27742	7.59168	8.47704	10.3866	7.97984	8.02377	8.21658	8.35185	P	P	P	P	P	P	P	P	P	P	P	P	hsa_circRNA_100748	hsa_circ_0020926	exonic	chr11	+	3988781	3988912	uc001lyv.2	STIM1	TGTGGATGTGGAAGAAAGTGATGAGAGTTTTGCCGAATTGACAAGC
ASCRP001124	1463	693.333	1394.67	936.667	1692.67	1377.83	9001.33	1783.33	2417.17	2769.67	3570	12727.3	11.0314	10.6169	11.0822	10.7263	11.1109	11.0052	13.0135	9.91799	11.9172	12.4679	12.3884	11.7969	P	P	P	P	P	P	P	A	P	P	P	P	hsa_circRNA_100750	hsa_circ_0020929	exonic	chr11	+	3988781	4080626	uc001lyv.2	STIM1	TCTTTGGGCCTCCTCTCTAGTTTTGCCGAATTGACAAGCCCCTGTG
ASCRP001125	7369.33	3114.83	4460.5	4335.5	8810.5	7190.5	6283	3352.5	3012.67	3476.17	4885.67	19830.2	13.0476	12.618	12.7153	12.762	13.07	12.9535	12.4154	11.2516	12.32	12.7462	12.7229	12.3755	P	P	P	P	P	P	M	P	P	M	P	P	hsa_circRNA_100751	hsa_circ_0020934	exonic	chr11	+	4076755	4080626	uc001lyv.2	STIM1	CCTCCTCTCTTATACAATTGGACCGTGGATGAGGTGGTACAGTGGC
ASCRP001128	2043.33	1172.33	1475.67	1291.17	2218.33	1852.83	1246.17	1385.83	1168.5	943	997.667	5541.33	11.4655	11.3172	11.1991	11.1037	11.3719	11.3207	9.14347	9.4453	10.9427	10.5128	10.2697	10.8167	P	P	P	P	P	P	P	P	P	P	P	P	hsa_circRNA_100754	hsa_circ_0021087	exonic	chr11	-	8248521	8252051	uc001mgg.1	LMO1	GCAACCAGAGGCGTGCCGATGCTCTCCGTCCAGCCCAAAGGGAAGC
ASCRP001129	60.6667	50.6667	52.6667	51.3333	54.8333	51.1667	115	118.167	80.3333	85	107	152.5	5.94425	5.74286	5.93573	5.79927	5.82247	5.79705	5.88409	5.82845	5.96998	5.9856	6.081	6.2759	A	A	A	A	A	A	P	P	A	P	A	P	hsa_circRNA_100755	hsa_circ_0021102	exonic	chr11	-	8728631	8734282	uc010rbq.1	ST5	AAGTGAAGACATTCCTGCCAGGTGCTGGCAATGAGCCCACACACAG
ASCRP001130	187	143.5	231.667	164.5	163.167	149.167	363	264.167	187.667	258	226.167	245.667	8.03005	8.05516	8.33309	7.86332	7.82828	7.98611	7.25566	6.91316	7.87342	8.17993	7.65697	7.09526	P	P	P	P	P	P	P	P	M	P	P	P	hsa_circRNA_100756	hsa_circ_0005944	exonic	chr11	-	8732391	8734282	uc010rbq.1	ST5	GCGCTTACTGCCCACACACAGCGCCTGGTCCACATCCAGTCGATGC
ASCRP001131	137.833	118.333	149.167	89.6667	117.833	94.3333	188.5	198	127.5	136.167	157.167	159.167	7.48204	7.66183	7.66682	6.74552	7.30958	7.19846	6.43563	6.505	7.19543	7.00331	6.92991	6.34824	P	P	P	P	M	P	P	P	P	P	P	P	hsa_circRNA_100757	hsa_circ_0021110	exonic	chr11	-	8832793	8860897	uc001mgv.3	ST5	AGGCAGCAAGATTTCACACCCTTTGGAGAGTTTCTTTCTTGGATAA
ASCRP001133	330.5	187.833	1503.67	241.167	475.167	450.333	1153.83	1131.5	519.667	540.667	829.333	1729.67	8.96826	8.53196	11.2136	8.59527	9.4553	9.51965	9.00968	9.08108	9.5087	9.42979	9.87353	9.65	P	P	P	P	P	P	P	P	P	P	P	P	hsa_circRNA_100759	hsa_circ_0004099	exonic	chr11	-	9225206	9229179	uc001mhl.3	DENND5A	GGAGTTTCAAATCCTGCTCTACTCACAGCCATTATGCCAGTACATA
ASCRP001139	67.8333	56	53.1667	54.5	56.1667	52.3333	109.5	126.833	84.3333	92.3333	105.333	105.167	6.1503	6.01027	5.93218	5.90737	5.87036	5.92146	5.80156	5.87549	6.18891	6.19515	6.06391	5.73229	A	A	A	A	A	A	P	M	P	P	A	A	hsa_circRNA_100765	hsa_circ_0000279	exonic	chr11	-	18312988	18313566	uc001mod.1	HPS5	GGATTGAAAGGACCAAGCTACAGGACCCTCTGGTTTTATTTGAATC
ASCRP001141	71	62.3333	75.3333	68.6667	79.5	56.3333	148.667	150.167	83.5	101	113.333	116.833	6.26037	6.31346	6.56264	6.32529	6.57341	6.04726	6.15331	6.12572	6.0891	6.3628	6.27033	5.87521	P	A	P	A	P	A	P	P	P	P	P	P	hsa_circRNA_100767	hsa_circ_0021461	exonic	chr11	-	18528403	18531212	uc009yhs.2	TSG101	CCAATCCCAGCCACAGTCAGACTTGTTGGGGCTTATTCAGGTCATG
ASCRP001144	814.167	417.5	607.5	526	552.167	463	339.667	344.667	428.833	428.5	343.333	289.333	10.2845	9.81659	9.59375	9.80484	9.66683	9.54991	7.18697	7.31678	9.22134	9.06108	8.41339	7.32839	P	P	A	P	A	P	A	P	P	M	P	P	hsa_circRNA_100770	hsa_circ_0021506	exonic	chr11	+	22225349	22249132	uc001mqi.2	ANO5	CTTTCCATCCTCATCAAGAAACAGAATTGGGAAAAAGTCAATAAGC
ASCRP001146	58.3333	55.6667	64.6667	50.1667	58.6667	49.1667	142.333	159.667	84.1667	98.6667	106.333	119.667	5.88019	5.93921	6.28275	5.76211	5.97207	5.77973	6.0881	6.2317	6.15873	6.35912	6.14269	5.9391	A	A	A	A	A	A	P	P	P	P	P	P	hsa_circRNA_100772	hsa_circ_0021535	exonic	chr11	-	28080472	28113060	uc001msc.2	KIF18A	GTTCAGCCTATTCCTTGTTGTATATAATGAACAGATTCGTGATCTC
ASCRP001149	115.333	109.5	135.667	120.833	123.667	171.333	173.333	167.667	162.833	151	155	183	7.15248	7.48054	7.51878	7.31691	7.39099	8.22418	6.3408	6.29557	7.59055	7.24633	6.8882	6.56317	P	P	P	P	P	P	P	P	P	P	P	P	hsa_circRNA_100775	hsa_circ_0021549	exonic	chr11	-	30516842	30557722	uc001msq.3	MPPED2	ATACGGTGCACCTTGGGTCGACCCCATCCCATATGACACTCCAAAA
ASCRP001156	82.3333	57.3333	49.1667	136.333	105.667	55.6667	258.833	190.5	128.167	110.5	159.167	204.833	6.51527	6.06986	5.7683	7.50003	7.08738	6.07269	6.84687	6.43416	7.19835	6.57552	6.97356	6.79241	P	A	A	P	P	A	P	M	P	A	P	P	hsa_circRNA_100782	hsa_circ_0000284	exonic	chr11	+	33307958	33309057	uc001mul.1	HIPK3	ATATCTACAATCTCGGTACTACAGGTATGGCCTCACAAGTCTTGGT
ASCRP001157	71.5	53	61.5	93	71.6667	53.3333	116.333	131.333	81.1667	92.6667	106.167	123	6.28962	5.9263	6.20142	6.85352	6.38057	5.94574	5.88264	5.9563	6.08258	6.16461	6.08592	5.96791	A	A	A	P	A	A	P	P	A	P	P	P	hsa_circRNA_100783	hsa_circ_0008887	exonic	chr11	+	33307958	33350179	uc001mul.1	HIPK3	AGCCTTGGAGTATGATCAGGTATGGCCTCACAAGTCTTGGTCTACC
ASCRP001161	88.6667	66.8333	82.6667	84.1667	86.3333	74	239.333	139.333	116.667	123	127.667	145.5	6.65735	6.52979	6.73797	6.64836	6.71908	6.71687	6.73816	6.02838	6.95703	6.8038	6.5101	6.21909	P	A	P	P	P	P	P	P	P	A	P	P	hsa_circRNA_100787	hsa_circ_0021647	exonic	chr11	+	34107610	34112225	uc001mvg.3	CAPRIN1	CATGCAAACGGTGGTAAATTCACTCCAGCAGCAACCTCAGGCTGCA
ASCRP001162	78	67.3333	88.1667	68.3333	80.3333	76.6667	150.333	198.5	103.167	127	129.5	142	6.45311	6.46401	6.8085	6.30303	6.56778	6.76296	6.16734	6.47223	6.69839	6.90305	6.53605	6.15755	P	A	A	P	P	P	P	P	P	P	P	P	hsa_circRNA_100788	hsa_circ_0021650	exonic	chr11	+	34107851	34107960	uc001mvg.3	CAPRIN1	TGCCCTCCAGGATTCAATGCTGGATTTTGAAAATCAGACACTTGAT
ASCRP001164	161	95	612.333	112.833	135.167	109.667	2256.67	594	192.5	178.167	210.333	313.667	7.79624	7.22695	9.60624	7.18216	7.53317	7.50158	10.2645	8.1314	7.92275	7.54127	7.5051	7.43113	A	P	P	P	P	P	P	P	P	P	P	P	hsa_circRNA_100790	hsa_circ_0000288	exonic	chr11	+	34111725	34112225	uc001mvg.3	CAPRIN1	ATTCCAATCCATGCAAACGGTTCCTTTGGTATCATCCACAAGTGAG
ASCRP001165	78.6667	57.1667	57.5	70.3333	67.5	53.6667	123.333	142.333	83.5	97.3333	118.5	173.167	6.46986	6.02033	6.09743	6.32722	6.24635	5.97704	5.94329	6.06835	6.15298	6.29733	6.35383	6.50535	P	A	A	P	A	A	P	P	P	P	M	P	hsa_circRNA_100791	hsa_circ_0004851	exonic	chr11	+	34111725	34113603	uc001mvg.3	CAPRIN1	AAGAACAGCTTCAAACAGGTTCCTTTGGTATCATCCACAAGTGAGG
ASCRP001170	59.3333	57.8333	71.1667	55.6667	61.1667	58.3333	144.5	116.5	81.3333	92.8333	94.1667	101.167	5.85836	6.09523	6.46591	5.95214	6.05433	6.2274	6.11187	5.80749	6.04726	6.20916	5.83763	5.65519	A	A	P	P	A	A	P	P	A	A	A	A	hsa_circRNA_100796	hsa_circ_0021727	exonic	chr11	+	35222628	35226187	uc001mvu.3	CD44	TCGACAACAGGGACAGCTGTTTCAACCACACCACGGGCTTTTGACC
ASCRP001171	93.3333	100.833	117.5	90	102.333	80.5	399.5	217.167	127.667	136.333	145	169.667	6.7557	7.32661	7.31537	6.77381	7.05156	6.93939	7.39569	6.63154	7.18423	7.02744	6.75641	6.46411	P	P	P	P	P	P	P	M	P	P	P	P	hsa_circRNA_100797	hsa_circ_0021728	exonic	chr11	+	35222628	35229753	uc001mvu.3	CD44	ACCTCTTTCAATGACAACGCTTTCAACCACACCACGGGCTTTTGAC
ASCRP001173	63.3333	58.5	55.5	85	64.6667	59.3333	221.5	299.167	90.3333	87	118	168	5.99166	6.09679	5.98862	6.66711	6.14761	6.21143	6.64146	7.09118	6.36028	6.0129	6.34536	6.45407	A	A	A	P	P	A	P	P	A	P	P	P	hsa_circRNA_100799	hsa_circ_0006988	exonic	chr11	+	36248634	36248980	uc010rez.1	LDLRAD3	TGGACCAGAGAACCCGGCAGTGGGCAGGTGTTTGTGACTTCAGAGA
ASCRP001174	73.1667	64.8333	71.5	61.1667	75.5	60.3333	135	172	126.333	107.333	119	190.167	6.29047	6.45452	6.47538	6.0684	6.45499	6.24238	6.04096	6.32485	7.12257	6.52461	6.3129	6.63534	M	A	P	P	P	A	P	P	M	P	P	P	hsa_circRNA_100800	hsa_circ_0021773	exonic	chr11	+	43421437	43429127	uc010rfj.2	TTC17	TAGCTCTGAGATCTCTCCAGCGAACACTGAATGAGTTAAAAGAGTA
ASCRP001176	144.167	133.167	107.667	206.333	133.5	103	1520.67	2264	114.667	151.167	208.5	379.667	7.56846	7.93469	7.17346	8.31694	7.51473	7.37024	9.49123	10.4108	6.93138	7.25808	7.49185	7.70573	A	M	P	A	P	P	P	A	P	P	P	P	hsa_circRNA_100802	hsa_circ_0009018	exonic	chr11	+	44129232	44135851	uc010rfo.2	EXT2	AAGGACCAGGGAGTGTGAGGAAGAGGCTGTCTGTGTCATTATGTGT
ASCRP001179	187	134.167	221	125.167	180.667	140.333	400.333	544.5	199.5	228.333	281.833	609.667	8.03091	7.92755	8.25616	7.33993	8.01442	7.90536	7.39837	8.01885	7.98172	7.94669	8.07427	8.33828	P	P	P	P	P	P	P	P	P	M	P	P	hsa_circRNA_100805	hsa_circ_0007001	exonic	chr11	-	46515157	46529920	uc001ncu.1	AMBRA1	GTCCTGGCAGATTATCTCCTGCTGCATACTACGCCCAGAGGATGAT
ASCRP001180	289.333	230	323	259.833	286.167	229.5	764.333	1107.83	382.667	356.333	387.167	851.167	8.79383	8.83892	8.81866	8.69711	8.75936	8.67688	8.34292	9.04063	8.98317	8.74134	8.62892	8.78099	P	P	P	P	P	P	P	A	P	P	P	A	hsa_circRNA_100806	hsa_circ_0007061	exonic	chr11	-	46515157	46534363	uc001ncu.1	AMBRA1	AGGGTCCTGGCAGGAGGCTGCTGGAATCTTCCCTCATTTCATTATC
ASCRP001182	380.333	323.667	364.5	351	382	299.333	949.333	1314.17	463.5	390.667	437.667	1043.5	9.17059	9.43424	9.01108	9.18026	9.1206	9.05443	8.66921	9.34303	9.3471	8.90971	8.8134	9.03292	A	P	P	P	P	P	P	A	P	M	P	P	hsa_circRNA_100808	hsa_circ_0003110	exonic	chr11	-	46529740	46534363	uc001ncu.1	AMBRA1	TTGAGGACTTTGAGAGGCTGCTGGAATCTTCCCTCATTTCATTATC
ASCRP001183	78.8333	65	69.5	68.3333	69.6667	63.6667	139	157.333	92.1667	106.5	128.333	167	6.46108	6.41176	6.49153	6.3081	6.31552	6.43965	6.06641	6.20919	6.38789	6.50791	6.53912	6.44223	P	A	M	P	M	P	P	P	P	P	P	P	hsa_circRNA_100809	hsa_circ_0000304	exonic	chr11	-	47504246	47510576	uc001nfr.1	CELF1	TACTCTTGGACCCCAGTATTTAGCACTCAAAGAAAATGAACGGCAC
ASCRP001184	59.3333	50.5	64	50.5	59.3333	59.3333	172.5	182.5	79.8333	92	110.833	149	5.88584	5.73573	6.24909	5.77202	5.96451	6.24233	6.3298	6.40199	6.06813	6.18057	6.16186	6.24697	A	A	A	A	A	A	P	P	A	P	P	P	hsa_circRNA_100810	hsa_circ_0022015	exonic	chr11	+	47603639	47604020	uc001nft.3	NDUFS3	CTATGTTGAGATTGTCTACAACCTGTTGTCTCTGCGCTTCAACTCA
ASCRP001189	104.167	91.1667	94	91.6667	83.1667	70.5	396.833	409.333	89.1667	125.333	147	281.5	6.94398	7.10624	6.88308	6.79993	6.64289	6.67392	7.38796	7.56609	6.34255	6.86767	6.80376	7.2888	P	P	P	P	P	P	P	P	P	P	P	M	hsa_circRNA_100815	hsa_circ_0004075	exonic	chr11	-	47774467	47776216	uc001ngj.3	FNBP4	ACTGGCAGGAGGCGGTCTATGCTTGCTTGGTGCTTATGCTGACAGT
ASCRP001192	67	63.5	70.6667	63.5	67.6667	61.5	160.333	174.5	93.6667	111.167	124.833	128.667	6.12041	6.30693	6.45277	6.15355	6.21355	6.19368	6.24223	6.31747	6.53187	6.61844	6.46019	6.03995	A	A	A	P	P	A	P	M	P	P	P	M	hsa_circRNA_100818	hsa_circ_0022080	exonic	chr11	-	47823362	47825088	uc009ylw.3	NUP160	TTATGACAAGGATTATATTCAACTGCTACATCCCTGGTGTCAAGTC
ASCRP001194	53.3333	48.5	49	50.8333	55.1667	52.8333	111.167	117	77	87.1667	92.6667	115.167	5.62869	5.62736	5.72414	5.77537	5.79796	5.88987	5.82346	5.81406	5.8445	6.01171	5.77863	5.85419	A	A	A	A	A	A	P	P	A	P	A	P	hsa_circRNA_100820	hsa_circ_0022142	exonic	chr11	-	57256388	57256865	uc001nkk.3	SLC43A1	ATGCTGCAGTGGACGGGGTTGCTACCAAATCCATCAGACCACGCTA
ASCRP001195	1239.67	859.333	1067.17	937.333	1240	1090.17	2905	2620.17	904.833	1050.67	1261.5	3734.17	10.7667	10.9192	10.5912	10.706	10.6529	10.6617	10.6091	10.6711	10.5084	10.7243	10.7203	10.3792	A	P	P	P	P	P	P	P	P	P	P	P	hsa_circRNA_100821	hsa_circ_0005204	exonic	chr11	-	57258696	57259335	uc001nkk.3	SLC43A1	GAGATGCCAGGGTCTGTCCCCTTACGCAAGAGCCTCTGCTCCCCCA
ASCRP001196	73.8333	68.6667	58.1667	90.1667	66.1667	71.5	393.167	330.167	78.6667	109.5	218.667	330.333	6.31671	6.54957	6.07163	6.78659	6.18625	6.5646	7.36894	7.22586	5.97976	6.58172	7.59461	7.51272	P	A	A	P	A	A	P	M	A	P	P	M	hsa_circRNA_100822	hsa_circ_0022168	exonic	chr11	+	57460082	57463515	uc001nkx.1	ZDHHC5	ACTAATGAGGGTTACGGGTAAATTCCGGGGAGGTGTGAACCCCTTC
ASCRP001197	112	91.6667	156	101.833	95.8333	89.1667	182	148.833	115	146.5	128.667	128.833	7.11229	7.13918	7.72538	6.96235	6.93721	7.12309	6.40769	6.14425	6.96495	7.19443	6.54349	6.01988	P	P	P	P	P	P	M	P	P	P	P	P	hsa_circRNA_100823	hsa_circ_0005795	exonic	chr11	-	58317258	58322413	uc001nmw.3	LPXN	GGTGCAGAAGTGAAGCCCAAGAGCCAAAGGAATCACCACCACCTTC
ASCRP001201	119.333	76.6667	89.5	97.1667	91.6667	76.1667	516.333	591.167	120	164	177.167	234.333	7.2073	6.80784	6.84161	6.87249	6.83709	6.75455	7.76399	8.1262	7.06302	7.41194	7.16902	6.99301	P	P	P	P	P	P	P	A	P	P	P	M	hsa_circRNA_100827	hsa_circ_0022249	exonic	chr11	-	61044064	61045948	uc001nra.3	VWCE	TTGTGTTCCAGGCTGTTTTCACAGTGGTGTCGTCCGAGCTGAAGGG
ASCRP001203	71.6667	56.3333	71.1667	63.1667	67.6667	60.8333	141.833	154.5	85.6667	105	115	138.5	6.25564	6.07461	6.47436	6.17037	6.23357	6.28821	6.1065	6.18326	6.25162	6.49316	6.28213	6.14399	P	A	P	A	P	A	P	P	P	P	P	P	hsa_circRNA_100829	hsa_circ_0005130	exonic	chr11	+	61133516	61133688	uc001nrl.2	TMEM138	CATGTCTGGGTCATGCATCCAGGATATTGCAGTCCTCTTCAACATC
ASCRP001204	72.8333	57.8333	55.6667	74.3333	66.6667	57	108.833	130.333	80.8333	93.6667	114	131.667	6.32155	6.15366	6.01722	6.43479	6.20096	6.13962	5.82021	5.9414	6.0332	6.24153	6.27349	6.07316	P	A	A	M	P	A	P	P	A	P	P	P	hsa_circRNA_100830	hsa_circ_0002058	exonic	chr11	+	61133516	61135470	uc001nrl.2	TMEM138	TATTCCAGAGACTAGCATCCAGGATATTGCAGTCCTCTTCAACATC
ASCRP001206	232.5	200.333	244.333	233.833	161.333	205.167	1581	2116.33	244	315.667	388.833	719.5	8.4206	8.64187	8.41817	8.5501	7.80611	8.49412	9.58437	10.2133	8.34375	8.49766	8.63424	8.54119	P	P	M	P	P	P	P	P	P	P	M	P	hsa_circRNA_100832	hsa_circ_0022378	exonic	chr11	-	61574135	61578547	uc001nsh.3	FADS1	ATACTTCTTCCTAAGCCCAGGCTGGCTGGCTGCAGCATGACTTTGG
ASCRP001207	48.3333	47	37.3333	43.6667	47.8333	42.6667	93	128.333	65.1667	68.6667	103.667	159.333	5.49584	5.5729	5.2111	5.51586	5.54819	5.41588	5.63656	5.92824	5.37122	5.31558	6.00838	6.39076	A	A	A	A	A	A	P	P	A	A	P	P	hsa_circRNA_100833	hsa_circ_0022383	exonic	chr11	+	61605249	61615756	uc001nsj.2	FADS2	ACGTGTTTGTTCTGGGCGAATGGCAGCCCATCGAGGATGCCTTCCG
ASCRP001209	62.1667	52.3333	62.5	56	61.5	58	131.667	146.167	94	104.167	106.333	130.167	6.01829	5.90931	6.2679	5.96436	6.06161	6.20507	6.01466	6.09683	6.47279	6.44158	6.07069	6.05229	A	A	A	P	A	A	P	P	P	P	P	P	hsa_circRNA_100835	hsa_circ_0022502	exonic	chr11	-	62459847	62460269	uc001nup.3	BSCL2	CTGGGCTCAGGTGATGCTGCATTACCGCTCAGACCTGCTCCAGATG
ASCRP001210	233	147.167	305.667	140.333	223	253.667	1165.5	455	253.667	285.833	304.333	1779.33	8.42541	8.12457	8.73245	7.56057	8.3695	8.80838	9.03865	7.74224	8.40469	8.33097	8.18815	9.66111	P	P	P	P	P	P	P	P	P	P	P	A	hsa_circRNA_100836	hsa_circ_0022505	exonic	chr11	-	62462039	62470021	uc001nup.3	BSCL2	GAATCATCTCCACTTCTTCGCGTTCGGACCGACTGTGATTCCTCCA
ASCRP001211	60.3333	54.5	50.8333	65.3333	61.3333	59.5	302.167	229.333	82.5	90.8333	109	117.833	5.93324	5.95413	5.73933	6.20284	6.08326	6.22691	7.03739	6.702	6.1083	6.09444	6.12818	5.89332	A	A	A	P	P	A	A	P	P	M	P	P	hsa_circRNA_100837	hsa_circ_0022537	exonic	chr11	-	62594626	62595103	uc001nvh.3	STX5	CATCAAACAGAATGGAATCCAGACAAATAAGCCAGCTTTGCGTGCT
ASCRP001214	214.667	157.167	218.5	172.333	221.333	165.167	455.5	573.667	253	257.667	274.333	674.5	8.25804	8.21905	8.25195	7.93971	8.3542	8.168	7.60061	8.08647	8.40666	8.15472	8.02066	8.45931	P	P	P	P	P	P	P	P	P	A	P	P	hsa_circRNA_100840	hsa_circ_0022587	exonic	chr11	+	62650379	62653080	uc001nwc.3	SLC3A2	TTCCTGGACAGGCATCCGTGTCATTCTGGACCTTACTCCCAACTAC
ASCRP001216	62.5	53	60.8333	58.5	58.8333	58.3333	137.333	131.167	82.5	98.5	97	120.667	6.03651	5.84048	6.24481	6.03655	5.94812	6.17233	6.07009	5.95314	6.09351	6.24291	5.86763	5.93554	A	A	A	P	A	A	P	A	A	M	A	P	hsa_circRNA_100842	hsa_circ_0022591	exonic	chr11	+	62652648	62653080	uc001nwc.3	SLC3A2	TCCTGGACAGGCTCTTGATTGCGGGGACTAACTCCTCCGACCTTCA
ASCRP001218	135	83.3333	227	65	81.3333	67.3333	874.833	215.167	113.333	133	148.167	188.167	7.45191	6.977	8.27755	6.19375	6.63744	6.57705	8.54937	6.6126	6.928	6.94677	6.79127	6.60767	P	P	P	P	P	P	P	P	P	P	P	P	hsa_circRNA_100844	hsa_circ_0022603	exonic	chr11	+	63517462	63517670	uc001nxm.3	RTN3	ATCCATTCAATGCACGATCTGATTTTCTGGAGAGATGTGAAGAAGA
ASCRP001219	3553.67	1858.33	3860	2463.17	3903.67	3303.33	9006	4158	3042.17	3797.33	4667.83	13866.5	12.201	11.9819	12.4784	11.9467	12.0327	11.9731	12.9852	11.7596	12.3433	12.865	12.6505	11.9414	P	P	P	P	P	P	M	P	M	P	A	P	hsa_circRNA_100845	hsa_circ_0022614	exonic	chr11	+	63662630	63663105	uc001nxv.4	MARK2	AACTGAACTCCTCCAGCCTCCAGAAACCCACCTTGGGACACCTTGA
ASCRP001222	70.3333	50.5	74.8333	62.8333	59.3333	54.6667	179.667	201.167	82.5	97.8333	120.833	138.333	6.24533	5.73747	6.52472	6.13277	6.01115	6.05354	6.38592	6.52301	6.0599	6.31001	6.35949	6.13444	A	A	A	P	A	A	P	P	A	P	P	P	hsa_circRNA_100848	hsa_circ_0022812	exonic	chr11	+	65055186	65063461	uc001odj.3	POLA2	CTTCGTGAAGACTTTGAGCAAAGCATGGTCCTGGTTGCCTGTGGAC
ASCRP001223	533.5	395.5	574.167	492.333	622.667	578.833	3758.67	759.667	1512	1335.33	1469.17	3832.5	9.64176	9.745	9.52474	9.69533	9.82067	9.86227	11.2261	8.48597	11.41	11.1744	10.9754	10.4159	P	P	P	A	P	P	P	P	P	P	P	P	hsa_circRNA_100849	hsa_circ_0004291	exonic	chr11	+	65061623	65063461	uc001odj.3	POLA2	AGAGCTGAGGTACTTCGTGAAGCTCCGGCTCCCACCTTGTCTTTGT
ASCRP001224	2484.83	1188.67	818.667	2268.5	1415.83	1102	8590	14940.7	881	772	2114.67	14923	11.6855	11.3419	10.0495	11.8459	10.8441	10.6813	12.9641	13.8573	10.4701	10.144	11.3825	12.0148	P	P	P	P	P	P	M	P	P	P	P	P	hsa_circRNA_100850	hsa_circ_0006857	exonic	chr11	+	66006274	66006748	uc001oha.2	PACS1	CCATCGTGGGGTGGTGAAGGTGGGTCTGGTTGAAGACTCTCCCTCC
ASCRP001225	296	174.333	356.833	187.833	262.667	230.333	630.667	640	274.833	377	428.667	508.667	8.79654	8.39161	8.98055	8.12472	8.63479	8.69834	8.05308	8.25284	8.5185	8.84704	8.78366	8.12113	P	P	M	P	P	P	P	P	A	P	P	P	hsa_circRNA_100851	hsa_circ_0022983	exonic	chr11	-	66133406	66137003	uc001oht.3	SLC29A2	ACGGAGCCTGACCTCTTACTTCCTGTGGTACTTCCAGGCGCGACTG
ASCRP001226	93.1667	102.333	64	87.5	63.3333	76	543.333	792.167	89.6667	108.667	140.333	343.167	6.75638	7.28691	6.28789	6.73141	6.12692	6.77795	7.84558	8.55599	6.36346	6.55759	6.70432	7.55408	P	P	A	P	A	P	P	P	P	P	P	A	hsa_circRNA_100852	hsa_circ_0022989	exonic	chr11	+	66254010	66255478	uc001oif.1	DPP3	TGTGCTTGGCTCAGGAAAAGCTGGAACGGGTGATCCTAGGGAGTGA
ASCRP001227	249.167	203.333	312.833	179.667	229.167	251.167	545.167	499.667	256.5	280.833	289.667	445.667	8.53158	8.64278	8.76791	8.02012	8.41497	8.84662	7.85008	7.89391	8.4218	8.2909	8.12117	7.90739	P	P	P	P	P	P	P	P	P	P	P	P	hsa_circRNA_100853	hsa_circ_0022997	exonic	chr11	+	66288740	66291353	uc001oii.1	BBS1	GTGACAAGGCCCTGCTCAATGTCATCCACACCCCGATGAGCCTTCC
ASCRP001228	53.3333	49	44.5	56.1667	53	48.8333	136	153.167	71.6667	73.6667	91.3333	117.333	5.69619	5.675	5.56763	5.94617	5.75247	5.77953	6.05911	6.14426	5.67066	5.57639	5.7157	5.89307	A	A	A	P	A	A	P	P	A	A	A	P	hsa_circRNA_100854	hsa_circ_0004144	exonic	chr11	-	66444138	66444562	uc001ojb.3	RBM4B	GAGTTTCAAGGCTCTTGTCAGGATGGTGAAGCTGTTCATCGGAAAC
ASCRP001229	142	96.5	113.167	101.667	107.333	95	301.333	289	134.333	157.333	169.333	398	7.54647	7.23201	7.23495	6.92896	7.11191	7.19922	7.04484	7.05577	7.27117	7.28689	7.09963	7.7719	P	P	P	P	P	P	P	P	P	A	P	P	hsa_circRNA_100855	hsa_circ_0023033	exonic	chr11	+	66589113	66590145	uc010rpl.2	C11orf80	AGATGTGTCTCCAGACCCTTCAAGAGTCTATACTTTGCTCACAACT
ASCRP001231	82	70.5	64.1667	71.8333	76.8333	64.5	195.833	163.833	87.8333	99	103.333	152.5	6.48789	6.55591	6.28058	6.38707	6.53676	6.42449	6.48318	6.25305	6.29782	6.32498	6.01716	6.29231	P	A	A	P	P	P	P	P	P	P	P	P	hsa_circRNA_100857	hsa_circ_0023056	exonic	chr11	+	66974980	66975159	uc001ojw.3	KDM2A	AATATGGTGCAGAGGCCCTCCACGGGAGTCGTCGCATGGTGGATGT
ASCRP001234	3185	2474.17	2643	2821.33	5293.83	3856.33	5300.17	1228.67	2092.67	1936.17	2937.83	13053.8	11.9888	12.3276	11.9704	12.1645	12.3164	12.1638	12.0044	9.22002	11.7666	11.8281	12.0248	11.8401	P	P	P	P	P	P	P	A	P	P	P	P	hsa_circRNA_100860	hsa_circ_0023179	exonic	chr11	+	68115314	68115711	uc001ont.3	LRP5	CCGCTCACGGCCTCGCCGCTCCTGCTATTTGCCAACCGCCGGGACG
ASCRP001235	14820.7	9472.33	9110.17	12179.5	16699.8	13239.7	12661	10788.2	7638	6625.17	9386.67	45533.5	14.0951	14.074	13.6223	14.2812	13.8455	13.7707	13.4439	13.3681	13.809	13.9917	13.8017	13.6435	P	P	P	P	P	P	P	P	P	P	P	P	hsa_circRNA_100861	hsa_circ_0023180	exonic	chr11	+	68115314	68125315	uc001ont.3	LRP5	GCTCGTTCCGCCTCGCCGCTCCTGCTATTTGCCAACCGCCGGGACG
ASCRP001236	381.333	281.333	389.833	406.167	616.667	484.833	528.833	408.667	325.5	323	369.667	881.333	9.18002	9.21041	9.11508	9.43675	9.80017	9.62934	7.79987	7.56987	8.74952	8.53863	8.54451	8.83476	P	P	M	P	P	A	P	P	P	P	P	P	hsa_circRNA_100862	hsa_circ_0023182	exonic	chr11	+	68115314	68133170	uc001ont.3	LRP5	TGTAAGGCAGCCTCGCCGCTCCTGCTATTTGCCAACCGCCGGGACG
ASCRP001242	68.6667	61	47.1667	61.6667	62.3333	51.8333	147.833	153.167	78.5	89.3333	99	108.667	6.11259	6.17953	5.62877	6.06749	6.08307	5.90533	6.14447	6.18274	5.99107	6.11413	5.92039	5.76601	A	A	A	P	A	A	P	P	A	P	A	P	hsa_circRNA_100869	hsa_circ_0023276	exonic	chr11	-	68571467	68575106	uc001oof.4	CPT1A	TGTGAACAGGCAACTGCATGTCCAGCCAGACGAAGAACGTGGTCAG
ASCRP001243	61.5	51	53.3333	48	55.6667	52.8333	116.833	111	78	87.3333	94.5	103.5	5.92679	5.76743	5.9326	5.69716	5.8426	5.91554	5.87412	5.72935	5.95961	6.07128	5.77727	5.66391	A	A	A	A	A	A	P	P	A	P	A	P	hsa_circRNA_100870	hsa_circ_0005282	exonic	chr11	-	68571467	68580044	uc001oof.4	CPT1A	AAAGACACTGTGAACAGGAACGGCATCATCACTGGCGTGTACCCGG
ASCRP001245	74.3333	60.6667	64.5	73.3333	72.8333	68	147.167	162	100.333	105.5	138.833	223.333	6.38136	6.2196	6.27705	6.39037	6.43055	6.60587	6.14833	6.23635	6.6579	6.485	6.69825	6.92518	P	A	A	M	A	P	P	P	P	P	P	A	hsa_circRNA_100872	hsa_circ_0000337	exonic	chr11	+	70200406	70202360	uc001opq.1	PPFIA1	CGTAAACTTCAAAAAAATTGCCACCTTCCAGAGAAGAGGTACGAGA
ASCRP001246	225	203.167	304.667	238.667	223.667	237.667	401.667	262	203.333	213	259.667	324.167	8.35109	8.65063	8.72974	8.58957	8.36276	8.7386	7.40659	6.89254	7.99325	7.86373	7.92541	7.46696	P	P	P	P	P	A	P	P	P	P	P	P	hsa_circRNA_100873	hsa_circ_0003429	exonic	chr11	+	70200406	70208594	uc001opn.2	PPFIA1	CGCCCACATCTAGAACGTTGCCACCTTCCAGAGAAGAGGTACGAGA
ASCRP001247	90.5	77.8333	96.5	82.5	85.8333	82.8333	215.333	224.333	111.833	135.833	155.333	186.5	6.71272	6.76375	6.95633	6.60825	6.73189	6.95247	6.61628	6.67873	6.86952	6.99386	6.88607	6.60724	P	A	P	P	P	P	P	P	P	P	P	P	hsa_circRNA_100874	hsa_circ_0003376	exonic	chr11	+	70251370	70253697	uc001opu.3	CTTN	AGCATATCAAACGGAATCAGTCCCCAATGCCTGGAAATTCCTCATT
ASCRP001248	150.167	126.167	148.667	121.333	156.333	121.5	282.167	342.167	212.333	198.5	218.833	469	7.65384	7.76673	7.67298	7.28591	7.76842	7.67337	6.96607	7.29274	8.08601	7.74285	7.58278	7.97434	P	P	P	P	P	P	P	P	P	P	P	P	hsa_circRNA_100875	hsa_circ_0023397	exonic	chr11	+	71201890	71202949	uc001oqn.3	NADSYN1	AGACCGACGAGTCTCCTGGGCTACCTGACCAAGTACGACTGCTCCA
ASCRP001249	977.5	352.333	643.833	459.667	1551.5	1229.83	1335.83	686.667	411.833	372.333	496.167	16105.2	10.5355	9.56225	9.67346	9.59688	10.9276	10.8371	9.26633	8.33543	9.13355	8.82176	9.04748	12.1283	P	P	A	A	P	P	P	A	P	A	P	P	hsa_circRNA_100876	hsa_circ_0023404	exonic	chr11	+	71668272	71671937	uc001ora.3	RNF121	CTCCTACAATGTTGATATGTCAGATCTCTCTCCAGAAGAGCAATGG
ASCRP001251	84	73	91.6667	81.6667	88	78.1667	272.667	299	105.667	136.667	155	185.333	6.56853	6.67191	6.89324	6.61453	6.72919	6.84999	6.92432	7.09124	6.78704	7.02308	6.92003	6.61284	P	A	P	P	P	P	P	A	P	P	P	P	hsa_circRNA_100878	hsa_circ_0023409	exonic	chr11	+	71693806	71701763	uc001ora.3	RNF121	TACCATAGGGATGGTGACCCTCTTTCAGATGTGGGTTGTTCCCCTC
ASCRP001252	118	75.3333	127	86	102.333	85.6667	544.667	267.333	133.167	194.833	182.833	203.333	7.19368	6.74003	7.38732	6.66794	7.01956	6.99793	7.84688	6.93773	7.2393	7.66986	7.22693	6.77139	P	P	P	P	P	P	P	P	P	M	P	P	hsa_circRNA_100879	hsa_circ_0023412	exonic	chr11	+	71706495	71706597	uc001ora.3	RNF121	TGTTCAGCAATCCCTTCCACGAGTTCTGCATCCGTGGCTGGTGCAT
ASCRP001254	175.5	116.833	216.833	145.833	167.5	142.5	442.333	371.333	182.5	253.667	274.167	270.333	7.94248	7.65765	8.2333	7.64042	7.89275	7.94672	7.55105	7.42897	7.82377	8.14075	8.02872	7.24029	P	A	P	P	P	A	P	P	P	P	P	P	hsa_circRNA_100881	hsa_circ_0007722	exonic	chr11	-	72420914	72425366	uc001oss.3	ARAP1	GCATCTTCAGCCTGCCCACTAAGGAGGAGGAGTCATTGCTGCCATC
ASCRP001255	179.667	182.333	140.333	304.833	203.5	130.167	1770.83	3522	145.5	204.667	341.333	475.833	7.97529	8.50906	7.59623	8.9386	8.20616	7.77977	9.77875	11.3718	7.44718	7.70617	8.41175	8.00858	P	P	P	P	P	P	P	P	P	M	P	P	hsa_circRNA_100882	hsa_circ_0002383	exonic	chr11	-	72468811	72470426	uc001osy.3	STARD10	GACCCCAAAGTGCCGGATGGAGTGCTGTGATGTGCCAGCCGAGACA
ASCRP001256	107	133.167	56.3333	150.167	93.8333	79.1667	906.833	2679.83	103.667	134.333	210.333	674	7.02215	7.91012	6.07863	7.70021	6.83288	6.84439	8.60232	10.7227	6.73223	7.01941	7.49079	8.45112	P	P	A	P	P	P	P	P	P	P	P	M	hsa_circRNA_100883	hsa_circ_0005918	exonic	chr11	-	72695132	72700142	uc001oth.4	FCHSD2	CATTATGAAGTGTGTGGACCAGTTGACAAAGATCCAAACTGAATTA
ASCRP001259	54.8333	45.1667	44.3333	64.6667	60.5	50.6667	93	138.5	74	74	103	122.667	5.74212	5.4945	5.54911	6.18187	6.03066	5.78119	5.61156	5.97858	5.73567	5.50147	6.06653	6.01086	A	A	A	P	A	A	P	M	A	A	A	M	hsa_circRNA_100886	hsa_circ_0003908	exonic	chr11	-	73418464	73431944	uc001oue.3	RAB6A	CTGGATACAATGTAAAGCAGGCAACAATTGGCATTGACTTTTTATC
ASCRP001260	68.6667	50.6667	67.5	55.3333	55.1667	52.5	127.667	127	75.5	91.3333	95.3333	104.667	6.21347	5.74617	6.3931	5.85533	5.86114	5.83213	5.96802	5.91512	5.81256	6.12965	5.81568	5.71939	P	A	A	A	A	A	A	P	A	P	A	P	hsa_circRNA_100887	hsa_circ_0023624	exonic	chr11	-	75167801	75173934	uc001owo.4	GDPD5	AGATGAACCTGCACTGGCTGCACAAGTGGGAGCGCCTCTGGTTCCT
ASCRP001263	66.8333	60.6667	61	67.6667	66.3333	57.8333	217.167	189	86	98	107.833	138.667	6.12661	6.15881	6.19532	6.2804	6.28138	6.15319	6.61907	6.44382	6.26788	6.3622	6.13552	6.1385	A	A	A	P	P	A	P	P	P	P	P	P	hsa_circRNA_100890	hsa_circ_0003320	exonic	chr11	+	76670022	76709865	uc001oxu.2	ACER3	ATATTGTTACATGTGGTAGGAATGGGATCCTGGTGCTTCCACATGA
ASCRP001264	131.833	108.333	158.667	157	125.167	169.667	1128.33	1154	175.167	176.5	248.167	622.333	7.39128	7.49836	7.76692	7.78168	7.40765	8.20951	8.97002	9.10948	7.7338	7.53479	7.83582	8.36046	M	P	P	P	P	P	A	P	P	P	P	P	hsa_circRNA_100891	hsa_circ_0023685	exonic	chr11	-	77085372	77103586	uc001oyg.4	PAK1	TTCTAATGCCTTGTAGCTGCTGCTGGTGGTGACAATGTCAAATAAC
ASCRP001265	104.5	94.3333	106	100.333	93.1667	85.3333	226.667	221.667	101.333	109.667	127.5	176.833	6.95015	7.20844	7.12885	6.94707	6.86158	6.98184	6.68349	6.655	6.69065	6.61246	6.50739	6.52533	P	P	P	P	M	P	P	P	P	P	P	P	hsa_circRNA_100892	hsa_circ_0008342	exonic	chr11	-	77330650	77340944	uc001oyk.3	CLNS1A	AAATGATTTATGCAAGTTTAAGCCGCCTGTCTTGGTTAGATGGCTC
ASCRP001266	106.5	86.6667	90.6667	92.6667	93.1667	86.8333	232.833	208.833	99	117.833	124.167	169.667	6.98436	6.99179	6.8564	6.81768	6.82779	7.02251	6.71848	6.57166	6.62903	6.6667	6.42834	6.46126	P	M	P	A	P	P	P	P	P	M	P	M	hsa_circRNA_100893	hsa_circ_0023696	exonic	chr11	-	77333544	77340944	uc001oyk.3	CLNS1A	GATTCAATAAGAGATTATGAAGCCGCCTGTCTTGGTTAGATGGCTC
ASCRP001267	65	50.6667	45.6667	76.1667	63.6667	48.3333	104	125	71.6667	79	103.333	124.833	6.09443	5.83047	5.67971	6.47907	6.12501	5.74133	5.74546	5.89391	5.69853	5.71029	6.03005	5.97194	A	A	A	P	A	A	P	P	A	A	P	M	hsa_circRNA_100894	hsa_circ_0000343	exonic	chr11	-	77336007	77336863	uc001oyk.3	CLNS1A	GTGGAAGCACATGAAGAATCAAAAGAACCTGTTGCTGATGAAGAAG
ASCRP001268	56.8333	54	50.3333	65.5	54.6667	63.5	282.5	491.5	77.3333	81.1667	106	166.167	5.78573	5.94841	5.80519	6.1636	5.78482	6.26367	6.95876	7.85497	5.88457	5.85586	6.07234	6.40898	A	A	A	P	A	A	P	P	A	A	P	P	hsa_circRNA_100895	hsa_circ_0023704	exonic	chr11	-	77394754	77396204	uc001oym.3	RSF1	TAAGCTACAGAAAAGAACGCTTGGTGTATGTTGGTATCAGTATTGA
ASCRP001269	136.5	94.6667	170.167	116	143.333	116.667	642	415	191	223.167	321	341.833	7.48447	7.19346	7.84967	7.22652	7.64226	7.58756	8.07222	7.58302	7.89901	7.94045	8.28783	7.55037	P	P	P	P	P	P	M	P	P	P	P	P	hsa_circRNA_100896	hsa_circ_0002290	exonic	chr11	-	77396149	77404656	uc001oym.3	RSF1	CATTCCTCCACAAATTCTTCTGTGTGACTCTTGCGATAGTGGATAC
ASCRP001272	145.667	119.167	111	139	128.667	120	223.667	256.167	239.167	141.667	134.333	115.5	7.57565	7.68205	7.18986	7.55367	7.46864	7.65231	6.65718	6.87416	8.30654	7.12075	6.59402	5.85518	P	P	P	P	P	P	P	P	P	P	P	M	hsa_circRNA_100899	hsa_circ_0023736	exonic	chr11	-	77632385	77633517	uc001oyt.3	INTS4	TGCCTTGAGGGTGCTTGAAGTTTCTGGGAAGTCGGCATCCAACCCT
ASCRP001277	614.833	399.667	1110.5	546.667	689.667	511.833	3481.83	3142.83	803.667	1173.17	1506.83	3328	9.84805	9.74648	10.6611	9.88043	9.96909	9.71286	11.0951	11.0809	10.2594	10.9262	11.0245	10.2562	P	P	P	P	P	P	P	P	P	P	P	M	hsa_circRNA_100904	hsa_circ_0007767	exonic	chr11	-	77824931	77832220	uc001oyz.1	ALG8	GGGTCCTTTCCTGGCCTTGGTGCTGTAAATGCATTGATGGAAAAAA
ASCRP001278	79.5	66	97.5	70.5	70.6667	64.5	140.667	133.167	92.5	121.5	120.833	136.667	6.41151	6.45564	6.93006	6.31746	6.3044	6.39138	6.06897	5.9645	6.44759	6.76185	6.34894	6.09456	P	A	M	P	P	A	P	P	M	P	A	M	hsa_circRNA_100905	hsa_circ_0005935	exonic	chr11	-	78176921	78204241	uc001ozi.3	NARS2	TAATGAAGATGGCCCTCAGCACACGAGCTTTTACTCAAGTGTTTAC
ASCRP001279	117	102.333	198.667	107.167	110.667	96.3333	560.167	701.667	150.167	161.5	189	382	7.18719	7.36455	8.09071	7.06662	7.20178	7.23741	7.88665	8.36336	7.48395	7.3622	7.29727	7.70585	P	P	P	P	P	P	P	P	P	P	P	P	hsa_circRNA_100906	hsa_circ_0023858	exonic	chr11	+	82917099	82947551	uc001ozz.1	ANKRD42	TGGCAAAGAGTGTCTTCATTGGCTGCTCTGGCATGGAGCTGATATC
ASCRP001280	74.8333	68	86.1667	85	86	76.1667	196.833	126.5	95.3333	114.5	116	122.833	6.37197	6.46738	6.79691	6.67911	6.70334	6.78415	6.48721	5.90796	6.53511	6.66988	6.27859	5.96521	P	A	P	M	P	P	P	P	P	P	P	P	hsa_circRNA_100907	hsa_circ_0023865	exonic	chr11	-	82989768	82991303	uc001pac.3	CCDC90B	AGCTCAACAGAGTTCTTCACTACCACAACCAAGGAGGGATATGATA
ASCRP001281	243.5	172.667	250.333	201.333	254.167	244.167	351.833	366.667	255.833	274.667	267.167	330	8.48697	8.40633	8.43894	8.26438	8.57338	8.78331	7.21487	7.40371	8.39611	8.26612	7.97049	7.50894	P	P	P	P	P	P	P	P	P	P	P	P	hsa_circRNA_100908	hsa_circ_0023881	exonic	chr11	-	85685750	85687725	uc001pbo.1	PICALM	ATCAGGAGCACAGGCACCCCCTGTAATGGCCTATCCTGCTACTACA
ASCRP001282	313.167	202.5	412.667	286	350.167	336	678.667	524.333	378.333	465.5	454	826.333	8.8891	8.65677	9.19477	8.83024	8.99801	9.18538	8.16341	7.97958	8.96104	9.18676	8.89398	8.73563	P	P	P	P	P	P	P	P	P	P	P	A	hsa_circRNA_100909	hsa_circ_0006629	exonic	chr11	-	85685750	85695016	uc001pbo.1	PICALM	CCCTGTATCAGGAGCACAGGATTCACTCCTTCTCCAGTTGCACAGC
ASCRP001283	201	147.333	199	178.833	197.333	151.667	377.667	457.833	211.167	289.5	281.167	501.667	8.14173	8.1293	8.09191	8.04662	8.15922	8.03951	7.31696	7.75575	8.0765	8.33511	8.07768	8.10171	P	P	P	A	P	P	P	P	P	P	P	P	hsa_circRNA_100910	hsa_circ_0002998	exonic	chr11	-	85685750	85714494	uc001pbo.1	PICALM	CCCTGTATCAGGAGCACAGGCCCCTAGCAGTCTTCTTGATGCTTTG
ASCRP001285	350.333	215.833	487.667	306.667	381.5	372	770.333	541.167	388	498.833	487.333	767.5	9.04601	8.74412	9.34716	8.9526	9.12582	9.29868	8.3567	8.01616	9.00862	9.30127	9.01936	8.62692	P	P	P	P	P	P	P	P	P	P	P	P	hsa_circRNA_100912	hsa_circ_0003695	exonic	chr11	-	85692171	85695016	uc001pbo.1	PICALM	TTGGAATGCTGCAACAATGGATTCACTCCTTCTCCAGTTGCACAGC
ASCRP001286	71.6667	55.5	54.6667	86.5	71.6667	59.8333	150	148.833	85.1667	89	122.5	137.667	6.21534	5.85795	5.96321	6.65149	6.3683	6.28315	6.14155	6.12102	6.22915	6.01381	6.37656	6.12813	M	A	A	M	P	A	M	P	A	P	P	P	hsa_circRNA_100913	hsa_circ_0002884	exonic	chr11	-	85692171	85707972	uc001pbo.1	PICALM	GAATGCTGCAACAATGCACATCAAAGCTGCCCAATGATCTGCTTGA
ASCRP001289	248.833	165	330.833	222.5	271.5	249	574.667	396.833	285.833	338.5	343.667	435.833	8.52714	8.31916	8.86062	8.47187	8.68277	8.82167	7.92083	7.53461	8.56432	8.63902	8.42332	7.88045	A	P	A	P	A	P	P	P	P	P	P	P	hsa_circRNA_100916	hsa_circ_0008773	exonic	chr11	-	85692787	85695016	uc001pbo.1	PICALM	ATCGGAAATGGAACCACTAAGAAGATTCACTCCTTCTCCAGTTGCA
ASCRP001290	115.5	127.333	136.667	151.333	122.5	111.833	370.667	200.167	129.5	118	149.167	182.5	7.1436	7.81332	7.50668	7.69783	7.35583	7.49444	7.28335	6.5118	7.22195	6.71708	6.81864	6.57315	P	P	A	P	P	M	P	M	P	P	P	P	hsa_circRNA_100917	hsa_circ_0002264	exonic	chr11	-	85692787	85707972	uc001pbo.1	PICALM	ATGGAACCACTAAGAACACATCAAAGCTGCCCAATGATCTGCTTGA
ASCRP001291	112.833	85.1667	86	73.5	81.5	71	126.667	110	92.6667	88.3333	98.1667	117.5	7.12119	6.99448	6.76011	6.41381	6.62678	6.56839	5.97423	5.74198	6.48602	6.11088	5.9285	5.91163	P	P	M	P	P	P	P	P	P	P	A	P	hsa_circRNA_100918	hsa_circ_0023918	exonic	chr11	-	85701292	85742653	uc001pbm.3	PICALM	GGACACCTACTCATGAAATGTTTGTTGACTTAATTCAGTGCACAAA
ASCRP001292	183.667	124.333	130.833	154	164	124.667	255	343.167	146	171	207.833	467.667	8.00641	7.76102	7.47073	7.71885	7.86265	7.6927	6.84036	7.31943	7.42965	7.47955	7.48742	7.97772	P	P	P	P	P	P	P	P	P	P	P	P	hsa_circRNA_100919	hsa_circ_0002513	exonic	chr11	-	85707868	85712201	uc001pbo.1	PICALM	ACATGGGGAGGGCAACTACACTTTCCAATGCAGTGTCTTCCCTGGC
ASCRP001293	153.167	117.333	115.667	168.333	156	108.333	370.667	392.333	150.667	185.333	204.333	397	7.69553	7.66294	7.2911	7.88996	7.77675	7.45509	7.29016	7.50683	7.50628	7.62241	7.44739	7.76523	P	P	P	P	P	P	M	A	M	P	P	P	hsa_circRNA_100920	hsa_circ_0023919	exonic	chr11	-	85707868	85714494	uc001pbo.1	PICALM	GTAGCAAGTACATGGGGAGGCCCCTAGCAGTCTTCTTGATGCTTTG
ASCRP001296	86.8333	61.1667	62.8333	63.6667	62.3333	51.3333	90.8333	101.5	81.5	92.3333	103.167	132	6.50598	6.29471	6.22412	6.14925	6.0478	5.8869	5.58768	5.60868	6.04444	6.13506	6.05403	6.07104	A	A	A	P	A	A	A	P	A	P	P	P	hsa_circRNA_100923	hsa_circ_0023936	exonic	chr11	-	85718584	85742653	uc001pbl.3	PICALM	CCAGACCTTTCACAGACTTAATTCAGTGCACAAATGAGATGAATGT
ASCRP001301	58	64.6667	45.6667	55	52.3333	49.1667	121.5	266	73.1667	72.8333	94.6667	116	5.81408	6.42969	5.6186	5.96436	5.77515	5.77786	5.92992	6.92264	5.6552	5.53344	5.79267	5.8612	A	A	A	P	A	A	P	P	A	A	A	P	hsa_circRNA_100928	hsa_circ_0023944	exonic	chr11	-	85742510	85742653	uc001pbl.3	PICALM	GGTGTATGGAAATGAGACTTAATTCAGTGCACAAATGAGATGAATG
ASCRP001305	62.3333	55.3333	58.3333	56.6667	60.6667	50	114.333	111.333	80	87.6667	95.1667	105.667	6.01248	5.97112	6.06144	5.96007	6.01943	5.86075	5.86163	5.74513	6.00603	6.03146	5.83578	5.72883	A	A	A	A	A	A	P	P	A	P	A	P	hsa_circRNA_100932	hsa_circ_0023966	exonic	chr11	-	86267594	86270865	uc001pbz.3	ME3	ACTTTCCGCAGGCCCCGGGGATGGCCTTTACCCTTGAAGAAAGGCT
ASCRP001311	202.667	166.667	244.833	199.667	252.167	219	378.5	344.333	214.167	248.667	273.333	430.5	8.15257	8.3153	8.42156	8.24767	8.56171	8.61679	7.3229	7.313	8.10655	8.11874	8.01622	7.86852	P	P	P	P	P	P	P	P	P	M	P	P	hsa_circRNA_100938	hsa_circ_0008648	exonic	chr11	+	94554695	94564707	uc001pfb.3	AMOTL1	GGGGCATTATGCTTCCCAGACCGCCCATGCCAACTTCCGTTCCCAT
ASCRP001312	206.167	148.667	190.167	145.333	204	156.667	405.833	665.5	257.167	292.333	343.5	796.5	8.18981	8.10482	8.00041	7.6271	8.22022	8.07696	7.41882	8.24635	8.4371	8.36658	8.42247	8.68092	P	P	P	P	P	P	P	P	P	P	P	P	hsa_circRNA_100939	hsa_circ_0002320	exonic	chr11	+	102056748	102076805	uc001pgw.2	YAP1	TGCTTCGGCAGGTCCTCTTCCTGATGGATGGGAACAAGCCATGACT
ASCRP001313	56	50.5	58.6667	49.3333	60.5	57.3333	130.5	134.5	80.6667	85	109	132.833	5.64615	5.7719	6.08972	5.72494	5.95481	6.01835	6.00718	5.9813	6.01089	6.01041	6.1149	6.08838	A	A	A	A	A	A	P	P	A	P	P	P	hsa_circRNA_100940	hsa_circ_0006286	exonic	chr11	+	102076623	102080295	uc001pgw.2	YAP1	ATTCTCCAAAATGTCAGCCATGAACCAGAGAATCAGTCAGAGTGCT
ASCRP001316	373	255.667	458.667	361.333	378	422.833	1892	957.833	646	749	742.5	876.833	9.13896	9.01911	9.29435	9.24221	9.10226	9.4435	9.72243	8.8481	9.88814	10.0629	9.67572	8.82503	P	P	P	P	P	P	A	P	A	P	A	P	hsa_circRNA_100944	hsa_circ_0024143	exonic	chr11	+	103173821	103194718	uc001phn.1	DYNC2H1	CAGTTCTCAGGACTGAAAGAGGTGTCCCCACTGCCTCTAAATCTCA
ASCRP001318	81.6667	54	76.3333	60.5	71.3333	64.6667	224.333	249.5	81.1667	108.167	127.5	153.333	6.50858	5.96911	6.56141	6.07502	6.40905	6.36777	6.66081	6.83264	6.07637	6.52216	6.50615	6.28308	P	A	P	A	P	A	P	P	A	P	P	P	hsa_circRNA_100946	hsa_circ_0024162	exonic	chr11	-	107673726	107673881	uc001pjq.3	SLC35F2	TTTTTGTTGGACTCTTTCTGTTTGGCTATAAGCCCTGCTGTTCGTG
ASCRP001322	79.1667	55.6667	62.1667	96.3333	79.1667	64.1667	157.333	143.167	91.1667	101.667	139.667	197	6.43215	6.03376	6.23517	6.86827	6.53551	6.39124	6.21413	6.07516	6.41437	6.36669	6.69253	6.72245	P	A	A	M	P	A	P	P	P	M	P	P	hsa_circRNA_100950	hsa_circ_0007694	exonic	chr11	+	108137897	108138069	uc001pkb.1	ATM	AGTACCATAGGCATCCTTCATCAAAAAGCCATTTGACCGTGGAGAA
ASCRP001328	498.667	313.667	353.5	392.5	473.167	297	439.167	559.5	338.833	316	368.833	1677.5	9.55917	9.37795	8.95507	9.38807	9.44195	9.0439	7.5382	8.05611	8.79949	8.49226	8.53515	9.59141	M	M	M	P	A	P	P	M	P	P	M	A	hsa_circRNA_100956	hsa_circ_0000357	exonic	chr11	-	116734383	116744352	uc001ppy.3	SIK3	AACAGCAGCATCAAACAGCTGCAGCAGGAGCAGTCTCTCCTACAGC
ASCRP001332	637.167	362	626.667	516.667	666.667	547.333	884.333	1160.33	549.167	610.667	668.5	1568.17	9.8963	9.59826	9.63543	9.78325	9.91539	9.79269	8.56514	9.12572	9.59558	9.64072	9.52606	9.52504	P	P	P	P	A	M	P	P	P	P	P	P	hsa_circRNA_100960	hsa_circ_0007372	exonic	chr11	-	118422500	118430579	uc001pto.2	IFT46	AGAGCTTTTGGGCAAGGACTTCCTCGTTCTGCCCATCTTCCTAACA
ASCRP001333	101	71.3333	94.8333	138.667	119.5	95.6667	220.167	133.5	183.667	154.5	138.333	129.333	6.89938	6.59411	6.94661	7.55407	7.30839	7.21237	6.6323	5.98615	7.81408	7.29996	6.69311	6.03158	P	P	P	P	A	P	P	P	P	P	P	P	hsa_circRNA_100961	hsa_circ_0008157	exonic	chr11	-	118425173	118430579	uc001pto.2	IFT46	AACAGAGAATTCTAAGCAGCACAACATCACAGACTTCCTCGTTCTG
ASCRP001334	66.5	62.3333	75	59.5	66.6667	59	187.667	141.667	94.1667	109.667	120.667	140	6.09634	6.34157	6.56177	6.02737	6.2686	6.18763	6.44214	6.05556	6.51073	6.59249	6.38295	6.14583	A	A	P	P	P	A	P	P	P	P	P	P	hsa_circRNA_100962	hsa_circ_0006374	exonic	chr11	+	118451960	118455359	uc001ptq.3	ARCN1	AACCAAAATGCATGCTCCACCCATTAATATGGAAAGGTGCTGTTGG
ASCRP001338	59.8333	55.5	75.3333	57.6667	61.5	65.5	119.5	98.3333	88.3333	97.6667	104.5	106.667	5.92347	5.99699	6.57394	5.9838	6.06611	6.52975	5.92027	5.59751	6.31044	6.25454	6.04396	5.7557	A	A	A	A	A	A	P	A	P	M	A	P	hsa_circRNA_100966	hsa_circ_0004293	exonic	chr11	-	118656760	118657227	uc001pub.2	DDX6	CCACCACTATTAAATTGACGTGAGTGAATTCAGATATAACTCAAGC
ASCRP001340	169.667	133.833	179.333	159.167	195.667	143	366.833	397	195.333	276.667	288.333	480.833	7.86143	7.89523	7.9186	7.7849	8.13978	7.92394	7.27818	7.5241	7.94221	8.27936	8.09174	8.00845	M	P	M	P	M	M	A	M	P	P	M	M	hsa_circRNA_100968	hsa_circ_0024553	exonic	chr11	+	118997644	119003929	uc001pvp.3	HINFP	CCCGTTTTCGGGTGAAGGCCATGCCGCCTCCTGGGAAAGTTCCCCG
ASCRP001342	2965.67	2106.17	2120.33	2125.17	2730.67	3384	3452.33	4141	2673.67	2488.83	2369.33	12208.8	11.8966	12.1341	11.7208	11.7624	11.6116	12.004	11.0795	11.7445	12.1059	12.22	11.6411	11.7341	P	A	P	P	P	P	P	M	P	P	P	P	hsa_circRNA_100970	hsa_circ_0024604	exonic	chr11	+	120276826	120278532	uc021qrm.1	ARHGEF12	TCACATGATTTTGACCCCACAGGTTTCCCCTCAAAAAACCTATAAG
ASCRP001343	253.833	194.667	256.667	209.667	250	223.667	583.833	702.667	245.5	334	372.333	1358.33	8.55886	8.59101	8.4912	8.36282	8.54719	8.63875	7.93936	8.36231	8.35562	8.61001	8.56594	9.3283	P	P	P	P	P	P	P	M	P	P	P	P	hsa_circRNA_100972	hsa_circ_0024609	exonic	chr11	+	120276826	120302620	uc021qrm.1	ARHGEF12	GCCCAGTAGTGACAATGCAGATGTTTCCCCTCAAAAAACCTATAAG
ASCRP001345	357.667	205	124.333	442.667	448.333	240.667	386	201.833	129	120.333	296.833	413.333	9.06752	8.65102	7.37677	9.51553	9.37076	8.77201	7.35203	6.52717	7.18477	6.71514	8.15405	7.80702	P	P	P	P	P	P	P	P	P	P	P	P	hsa_circRNA_100974	hsa_circ_0009021	exonic	chr11	+	120343758	120348235	uc001pxl.2	ARHGEF12	CAGAGTCCAGCGCCTAGAAGATTATCAGCGTCGCCTTGATACCTCC
ASCRP001346	58.1667	46.5	43.8333	58.3333	62.5	47.6667	106	108.5	72.1667	74.6667	100.667	140.167	5.82557	5.58053	5.54378	6.06853	6.1072	5.59338	5.78553	5.71175	5.70775	5.53341	5.96866	6.14955	A	A	A	P	A	A	P	P	A	A	A	P	hsa_circRNA_100975	hsa_circ_0002100	exonic	chr11	+	120345268	120348235	uc001pxl.2	ARHGEF12	CTGGTTTGCAGAGTCCAGAATTTGGATTTAACAAAAAGGAAGATGA
ASCRP001347	77.6667	51.1667	51.3333	65.6667	67.6667	48.6667	145	146.667	76.1667	75.3333	110.5	174.833	6.28041	5.7921	5.81386	6.24974	6.28622	5.75027	6.12388	6.10637	5.82234	5.60257	6.16193	6.51055	A	A	A	P	P	A	P	P	A	A	P	P	hsa_circRNA_100976	hsa_circ_0002955	exonic	chr11	+	120346048	120348235	uc001pxl.2	ARHGEF12	CAGAGTCCAGATTTATACACGTTGCTGCTGGAAGACATTCTTGTAT
ASCRP001348	105.333	56.3333	55.6667	152.5	175.5	70.3333	193.5	176	92.3333	95.3333	207.333	283.5	6.95579	6.03796	6.03923	7.70312	7.94375	6.66187	6.48124	6.3378	6.45351	6.27885	7.48604	7.31621	P	A	A	P	A	P	P	P	P	P	P	P	hsa_circRNA_100977	hsa_circ_0002089	exonic	chr11	+	120347369	120348235	uc001pxl.2	ARHGEF12	CAGAGTCCAGATAACAAAGCTTTATTCGTCATTTCCATGTCAGACA
ASCRP001349	75.6667	55.5	47.3333	111	85	53.3333	104.167	124	75	81.3333	104.667	122.667	6.37169	5.97593	5.66737	7.15177	6.61986	5.86965	5.75754	5.83147	5.75707	5.78738	6.07653	5.9708	P	A	A	P	P	A	P	M	A	A	A	M	hsa_circRNA_100978	hsa_circ_0003302	exonic	chr11	+	120916382	120930794	uc001pxo.3	TBCEL	TGCCATTCAGCATTTTAAGAAAGAAAGATGGATCAACCTAGTGGAA
ASCRP001350	141.167	135.167	191	157.833	180.833	226.167	230	200	167.833	181	191.833	175.333	7.53895	7.93043	8.0376	7.79888	8.01372	8.66307	6.69958	6.5291	7.66238	7.59007	7.32866	6.50054	P	P	P	P	P	A	P	P	P	P	P	P	hsa_circRNA_100979	hsa_circ_0006239	exonic	chr11	+	123464789	123465546	uc001pyw.2	GRAMD1B	GGAAACTCTGGTGTTAAGCCCCACCTACAAGCAGAGAAATGAAGAC
ASCRP001351	180	126	134.667	128.667	126.667	114	375.667	447.667	170	158.833	196	415.333	7.97377	7.80409	7.52865	7.45406	7.42637	7.52355	7.31023	7.70476	7.67873	7.34523	7.37132	7.8196	P	P	P	M	P	P	P	P	P	P	P	P	hsa_circRNA_100980	hsa_circ_0024731	exonic	chr11	+	123489400	123489932	uc001pyw.2	GRAMD1B	CCTTGACCAGTCTGGTGCTGCTGGTCATCCTTAACATGATGCTCTT
ASCRP001355	141	102.667	180.333	135	153.5	139	9150	415	2222.17	2254.67	3260.17	4165	7.53714	7.40308	7.93916	7.49944	7.73916	7.89336	13.0477	7.58943	11.8259	12.0519	12.2402	10.5099	P	P	P	P	P	P	P	P	P	P	P	P	hsa_circRNA_100984	hsa_circ_0002019	exonic	chr11	+	126142863	126143349	uc010sbq.2	FOXRED1	AAAGTGCAGAGTATTCACAGGCCTCCACTGGGCTCTCAGTAGGTGG
ASCRP001357	95.1667	79.3333	68.3333	88	70.5	71.6667	201	265.667	90.5	105.667	142.167	213.5	6.75161	6.86201	6.40868	6.73482	6.34641	6.66346	6.53018	6.93253	6.4096	6.47817	6.75117	6.84499	M	P	A	P	P	P	P	P	P	P	P	P	hsa_circRNA_100986	hsa_circ_0002083	exonic	chr11	-	128350085	128360471	uc001qej.2	ETS1	AGCTGGCTACACAGATATGGAATGTGCAGATGTCCCACTATTAACT
ASCRP001358	88.3333	118.833	63.6667	104.5	91	70.5	401	896.333	93.1667	107.167	162.667	241.833	6.61682	7.67199	6.23694	6.997	6.77938	6.65759	7.39397	8.74393	6.45873	6.51791	7.01266	7.05663	P	P	A	P	P	P	P	P	P	P	P	A	hsa_circRNA_100987	hsa_circ_0004296	exonic	chr11	-	128354717	128360471	uc001qej.2	ETS1	AGGACCAGTCGTGATATGGAATGTGCAGATGTCCCACTATTAACTC
ASCRP001359	173.5	99.1667	182.333	212	202.667	157.667	196.5	154.167	211.5	370	227.667	336.5	7.91057	7.28384	7.94931	8.37828	8.1935	8.09713	6.49495	6.1883	8.08103	8.76405	7.68332	7.52712	P	P	P	P	P	P	A	P	P	M	P	P	hsa_circRNA_100988	hsa_circ_0000369	exonic	chr11	+	128628009	128642880	uc009zci.3	FLI1	TGTCACACCTCAGTTACCTCAGGGAAAGAGGCTCTGTCGGTGGTGA
ASCRP001360	58.3333	54.1667	158	62.1667	55.1667	270.5	409.333	261.5	212	94.6667	108	558.167	5.86455	5.90951	7.75258	6.07763	5.81546	8.94798	7.43709	6.90192	8.07553	6.24552	6.17516	8.23875	A	A	P	P	A	P	P	P	P	P	P	P	hsa_circRNA_100989	hsa_circ_0000370	exonic	chr11	+	128628009	128651918	uc009zci.3	FLI1	TCACGATTGAGTGTCAAAGAAGGAGGCTCTGTCGGTGGTGAGCGAC
ASCRP001364	64.3333	53.3333	45.6667	78.3333	62	48.1667	110.5	127.5	68.3333	69	111.5	331.167	6.04804	5.93541	5.57914	6.5491	6.08077	5.64589	5.82222	5.91145	5.44863	5.39791	6.16465	7.51214	A	A	A	P	A	A	P	M	A	A	P	P	hsa_circRNA_100993	hsa_circ_0002484	exonic	chr11	-	130130750	130131824	uc001qgc.1	ZBTB44	TCCTCTATAGGACATTTCTGATTTATTTGCATCCTTGAAGAGCATC
ASCRP001365	104.667	81.5	93.5	80	87	78	284.333	330.833	127	146.833	145.5	269.5	6.93789	6.85385	6.90319	6.57574	6.71749	6.82571	6.97247	7.25354	7.17027	7.1779	6.76236	7.23015	M	M	P	P	P	P	P	P	P	P	P	P	hsa_circRNA_100994	hsa_circ_0024895	exonic	chr11	-	130773149	130776616	uc001qgk.4	SNX19	TAGTTCAAAGGTCTAGGCTGAGGTTCTCATCCAGTAAAATTTCTCC
ASCRP001368	150.667	137.167	109	207.833	152	93.1667	1332.67	2158.33	140	193.667	270.667	320.333	7.67899	7.97307	7.17383	8.3383	7.7112	7.17175	9.26437	10.2698	7.35674	7.69815	7.99693	7.47188	P	P	P	P	P	P	P	P	P	P	P	P	hsa_circRNA_100997	hsa_circ_0002881	exonic	chr12	-	459786	463400	uc010sdn.1	KDM5A	AGAAGAAGAGGTTGATCTCTATGTTTGTATGTTTTGTGGTCGGGGA
ASCRP001370	97.5	96	84.1667	99.5	87	82.6667	227.5	302.667	92.3333	99.5	111	159.667	6.81883	7.20935	6.71834	6.93766	6.74872	6.90145	6.68119	7.12205	6.47809	6.38403	6.17406	6.35318	P	A	P	P	P	M	P	M	P	P	P	P	hsa_circRNA_100999	hsa_circ_0025006	exonic	chr12	+	1887019	1893239	uc001qjn.3	ADIPOR2	TGACATCTGGGTATGGGAAGGTCGGTGGCGAGTGATCCCTCATGAT
ASCRP001371	60	49.1667	46.1667	53.6667	51.1667	66.1667	162.5	289.5	66.8333	74.5	87.5	115.333	5.89209	5.71212	5.6356	5.88488	5.70579	6.49201	6.25371	7.04245	5.45886	5.57317	5.60785	5.90254	A	A	A	A	A	P	P	P	A	A	A	P	hsa_circRNA_101000	hsa_circ_0000374	exonic	chr12	+	2929251	2930958	uc001qlb.2	ITFG2	CTGGAGAAACTGGATGTCACCATGGAGATGGGTGTCGTGAGCTGGT
ASCRP001372	175	135.667	231.833	178.833	183.833	181.167	563.833	429	237	319.833	285.167	277.667	7.92631	7.94566	8.3356	8.01338	8.0498	8.30189	7.89158	7.63814	8.26159	8.51461	8.0901	7.27627	P	P	P	P	P	P	P	P	P	P	P	P	hsa_circRNA_101001	hsa_circ_0025135	exonic	chr12	-	6458115	6465046	uc001qnv.3	SCNN1A	ACAACAAGAGGAATTACTCTCACTTCCACCACCCGATGTATGGAAA
ASCRP001373	196.833	117.833	252.167	183.333	203.167	176.667	407.833	513	231.833	381	367.5	497.5	8.11557	7.64749	8.47734	8.07246	8.20649	8.25455	7.43106	7.93464	8.23444	8.86195	8.54434	8.08305	P	P	P	P	P	P	P	P	P	P	P	P	hsa_circRNA_101002	hsa_circ_0025201	exonic	chr12	+	6646474	6646556	uc001qop.1	GAPDH	TTGGTATCGTGGAAGGACTCATGCAATGCCTCCTGCACCACCAACT
ASCRP001374	410.667	225	710.833	376.167	496.167	367.667	1035.67	1274.67	521.833	913.5	891.167	967.333	9.31017	8.80608	9.81925	9.3117	9.51386	9.2933	8.81447	9.28453	9.52237	10.4221	10.0572	8.94583	P	P	P	P	P	P	P	P	P	P	P	P	hsa_circRNA_101003	hsa_circ_0025202	exonic	chr12	+	6646474	6647162	uc001qop.1	GAPDH	CACTTTGTCAAGCTCATTTCCTGCAATGCCTCCTGCACCACCAACT
ASCRP001375	340.667	317	199.5	298.333	214.667	310.5	781.167	611.167	199.333	260.667	245.833	204.833	9.0047	9.36972	8.10917	8.8997	8.29917	9.10271	8.37715	8.17358	7.97764	8.18743	7.80973	6.77547	A	P	P	P	P	P	P	P	P	P	P	P	hsa_circRNA_101004	hsa_circ_0000375	exonic	chr12	-	6657590	6657991	uc001qoy.3	IFFO1	CCAGGGAGAGGTCCCATCCATGGGGGGGCGGAAGCGGGAGCGCAAG
ASCRP001376	62.1667	46.1667	47.8333	56.3333	57	54.6667	111.5	139.167	68.3333	73.3333	99	161.833	5.93713	5.50286	5.64323	5.92648	5.91581	6.06872	5.84158	6.0431	5.46064	5.48341	5.93963	6.39849	A	A	A	P	A	A	P	P	A	A	A	P	hsa_circRNA_101005	hsa_circ_0007845	exonic	chr12	-	6859013	6859932	uc001qqp.3	MLF2	ACTATATCAACCTGGATGAGATCGGGTGGTTTCATGGACATGTTTG
ASCRP001380	88.6667	77.8333	90.8333	75.3333	92	85.1667	173.667	288.833	145.667	137.833	140.167	436	6.62117	6.74124	6.88414	6.43372	6.80201	7.02872	6.32815	7.04332	7.42165	7.05396	6.71805	7.87981	M	P	P	P	P	P	P	P	A	P	P	M	hsa_circRNA_101009	hsa_circ_0025388	exonic	chr12	+	9020437	9021799	uc001quz.4	A2ML1	CTTGGATGAGGATACTGTAGTTGCTCTCCAAGCTCTTGCCAAATAT
ASCRP001381	51.6667	51.1667	50	46.1667	52.6667	48.5	441.833	103.833	209.833	173	171.5	256.167	5.61065	5.69913	5.74598	5.62479	5.72489	5.69612	7.49699	5.64564	8.04662	7.42673	6.93876	7.14768	A	A	A	A	A	A	A	A	P	P	P	P	hsa_circRNA_101010	hsa_circ_0025395	exonic	chr12	+	9073580	9074346	uc001qvc.1	PHC1	AACCAGTCTCAGGCCCAGATGTATCTACGGGCCACAATTGCTGCCA
ASCRP001382	125.333	97.6667	128	118	119.167	101	213.5	283.333	145.167	175.833	194.667	354.167	7.3143	7.26047	7.44764	7.26978	7.30448	7.33033	6.58968	7.01762	7.42915	7.53446	7.34525	7.59893	P	P	P	P	P	P	P	P	P	P	A	P	hsa_circRNA_101011	hsa_circ_0007481	exonic	chr12	-	11126253	11199787	uc021qvg.1	PRH1-PRR4	TACTCAAGAGTGGAAGTTTTCACAGGTTCTCCAGCATTTGGCTCAA
ASCRP001383	60.8333	52	54.3333	62.3333	53	57.1667	125	140.833	81.3333	94.6667	105.667	141.167	5.91656	5.84251	5.99517	6.15406	5.80604	6.13657	5.9726	6.05077	6.07333	6.25839	6.07778	6.1635	A	A	A	P	A	A	P	P	A	P	P	P	hsa_circRNA_101013	hsa_circ_0004123	exonic	chr12	+	12022357	12022903	uc001raa.1	ETV6	TTGGGAGAATAGCAGATAACTGTGTCCAGAGGACCCCCAGGCCATC
ASCRP001384	199.667	116.333	179.5	152	164.667	124.5	377	393	180	246.333	243.833	244	8.12904	7.60639	7.93581	7.71667	7.86865	7.74058	7.30352	7.51358	7.79585	8.09567	7.80432	7.08075	P	M	P	P	P	P	P	P	P	P	P	P	hsa_circRNA_101014	hsa_circ_0008932	exonic	chr12	-	12332743	12340053	uc001rah.4	LRP6	CAAGATTGAGGCAGGCAGTGGTTAAAGGTTCCCTTCCACATCCTTT
ASCRP001385	73.1667	60.5	62.3333	59.8333	67	67	156.667	145	87.6667	96.6667	109	138.5	6.2972	6.30323	6.24095	6.09401	6.15102	6.47265	6.21369	6.1291	6.27837	6.2946	6.1544	6.13923	A	A	A	P	P	A	P	M	P	P	P	P	hsa_circRNA_101015	hsa_circ_0000378	exonic	chr12	-	12397195	12397589	uc001rah.4	LRP6	CTTCAAGTGGCGGCCCCTTTGTTGCTTTATGCAAACAGACGGGACT
ASCRP001387	49	47.8333	43.3333	45.6667	46.8333	61.5	99.6667	111.5	74.3333	79	149.833	111.667	5.44013	5.55082	5.45256	5.56797	5.42537	6.28031	5.72185	5.75152	5.7802	5.75992	6.82365	5.81793	A	A	A	A	A	A	P	P	A	A	P	P	hsa_circRNA_101017	hsa_circ_0025506	exonic	chr12	+	13061176	13062105	uc001rba.3	GPRC5A	TACTCTCAAGAGGAAATCACTCAAGGTCCAGAATGGCTACAACAGT
ASCRP001388	287.833	239.667	451	273.333	356.333	305.333	1161.17	838.833	415.5	508.667	485.167	516.5	8.75302	8.89885	9.27805	8.76262	9.02686	9.08649	9.02128	8.64563	9.15079	9.33522	9.02033	8.13058	P	P	M	P	P	M	P	P	P	P	P	P	hsa_circRNA_101018	hsa_circ_0025513	exonic	chr12	+	14609494	14610229	uc001rby.4	ATF7IP	GTGAATACAGCATCCACCCAACCCACCAGTATCACCAGGAAAAACT
ASCRP001389	65.1667	55.6667	44	79	76.3333	52.8333	114.667	137.5	74.1667	77.5	110	155.667	6.06336	5.93912	5.50779	6.56256	6.48215	5.96501	5.85964	6.01718	5.77204	5.66386	6.08261	6.31985	A	A	A	P	P	A	P	P	A	A	A	P	hsa_circRNA_101019	hsa_circ_0006420	exonic	chr12	+	19615443	19626289	uc001ree.2	AEBP2	ACCTTTCAAGCATAAGCAGTACTATAATGGATGTAGACAGCACAAT
ASCRP001392	60.6667	51.5	56.3333	53.8333	58	51.8333	117	132.667	87.6667	91.5	103.5	134.167	5.9176	5.81551	6.06042	5.88732	5.93856	5.90287	5.88295	5.96292	6.30942	6.1528	5.985	6.09441	A	A	A	A	A	A	P	P	P	P	P	P	hsa_circRNA_101022	hsa_circ_0008664	exonic	chr12	+	22796696	22826594	uc001rft.3	ETNK1	GTTTGCATTGCTCTTCACAGATGGAATCACAAATAAACTTATTGGC
ASCRP001393	188.667	169	111.167	692	170.333	86	1596.5	902.833	125.5	121	134	160	8.01763	8.35557	7.19462	10.2915	7.91837	6.97545	9.5919	8.76342	7.16	6.75508	6.59765	6.3753	M	M	P	A	P	P	P	P	P	P	P	P	hsa_circRNA_101023	hsa_circ_0004426	exonic	chr12	-	24985656	24989530	uc001rgc.3	BCAT1	ATATACTGTACAAAGGCGAGAAGAAGAACTGGCAACTCCTCCACTA
ASCRP001395	65	68.8333	51.6667	71.6667	62.6667	52	367.167	438.5	78.6667	87.6667	103	136.833	6.09367	6.55626	5.87429	6.37103	6.09445	5.84175	7.27323	7.68517	5.95654	6.06507	6.04601	6.11251	A	P	A	P	A	A	P	P	A	P	P	P	hsa_circRNA_101025	hsa_circ_0025633	exonic	chr12	+	25232177	25236427	uc001rgg.2	LRMP	ACCATATTAAATCTGGAGAATGGTGTTGAACGCGTGTGTCCTGAGA
ASCRP001399	51.5	46.8333	46	50.6667	52	44	287.167	222.667	73.5	87.3333	94.1667	108.167	5.60263	5.58223	5.59648	5.76753	5.70602	5.52339	6.97993	6.67888	5.72301	6.04575	5.84237	5.7638	A	A	A	A	A	A	P	P	A	P	A	P	hsa_circRNA_101029	hsa_circ_0025705	exonic	chr12	-	27132716	27143560	uc010sjl.2	TM7SF3	TTTACTCCACTGGGTGGTTACCCTAACAGCTAATGATAAGACAAGT
ASCRP001400	97.8333	76.1667	123.5	98.1667	103.5	93.1667	568	534	132.167	200.333	221	332.333	6.82813	6.73904	7.38842	6.91058	7.00875	7.12964	7.90185	7.99247	7.24265	7.75785	7.60311	7.50827	P	A	A	P	P	P	P	P	P	A	P	P	hsa_circRNA_101030	hsa_circ_0025711	exonic	chr12	-	27143382	27143560	uc010sjl.2	TM7SF3	TGTGCTTCCCTAGGTGGTTACCCTAACAGCTAATGATAAGACAAGT
ASCRP001401	13635.8	6681.17	14141.3	8298.67	18293.2	14613.3	12923.2	13363.7	8445.67	6838.5	11758.3	65077.2	13.9441	13.4725	14.2883	13.6713	14.0046	13.8818	13.5106	13.6609	13.9079	14.0198	14.0637	14.0988	P	P	P	P	P	A	P	P	P	P	P	A	hsa_circRNA_101031	hsa_circ_0007478	exonic	chr12	-	27143382	27152609	uc010sjl.2	TM7SF3	GTGCTTCCCTAGACTCTCCTTTCCAATTCCTCGGAAACAGGCACTG
ASCRP001402	78.3333	55.6667	68.3333	78.8333	80.5	63.8333	128.833	131.333	101.833	121	121	142.667	6.4497	6.01252	6.38003	6.54295	6.58435	6.42885	5.99303	5.94855	6.66242	6.79949	6.391	6.19861	P	A	A	P	P	A	P	P	P	P	P	P	hsa_circRNA_101032	hsa_circ_0009009	exonic	chr12	+	27521194	27523163	uc001rht.2	ARNTL2	AACAAGGATAGAAATATCAGCCTCCAGTGGCAGCAGGTAAAGTGTT
ASCRP001403	85	58.1667	50.6667	108.167	77.6667	61.3333	136	174.333	81	79.8333	124.333	170.5	6.56431	6.1056	5.75842	7.09183	6.51812	6.31379	6.05302	6.33765	6.03281	5.77898	6.44456	6.45661	P	A	A	A	P	A	P	P	A	A	P	P	hsa_circRNA_101033	hsa_circ_0000384	exonic	chr12	+	27867712	27877119	uc001rih.3	MRPS35	AGCACGAGTAGTAGTCTTAAGACGGAAAGAACACCCGGAAATGAAA
ASCRP001404	69	59	71	61.1667	65.1667	58	134.667	151.5	96	112.167	119.333	134.667	6.20901	6.18235	6.46019	6.09731	6.22087	6.13911	6.04343	6.14879	6.51588	6.58934	6.33348	6.09538	A	A	A	P	P	A	P	P	P	P	P	P	hsa_circRNA_101034	hsa_circ_0007723	exonic	chr12	+	28458581	28460682	uc001rio.3	CCDC91	ATACAAAGAACTTCAGTATCTGGAGTCCATCTTTCACCATCTTCTC
ASCRP001405	75.6667	60.5	92.6667	70.3333	79	62.6667	165.667	173	99.8333	119.833	132	139.833	6.36415	6.19156	6.89509	6.31661	6.56216	6.36104	6.28217	6.3249	6.59291	6.76017	6.57758	6.15065	P	A	P	P	P	A	P	P	P	P	P	P	hsa_circRNA_101035	hsa_circ_0008250	exonic	chr12	+	28458581	28544344	uc001rio.3	CCDC91	GTTGCTAAATGCTCAGTATCTGGAGTCCATCTTTCACCATCTTCTC
ASCRP001407	99.5	86.1667	86	97.1667	79.3333	69.1667	414.333	538.333	82.6667	97.1667	126.667	187.667	6.8625	7.003	6.79525	6.89665	6.54315	6.6028	7.45323	8.00822	6.15012	6.28017	6.50294	6.62832	P	P	P	P	P	A	P	P	P	P	P	P	hsa_circRNA_101037	hsa_circ_0025767	exonic	chr12	-	29904598	29911710	uc001rjb.3	TMTC1	TCCATGATGAGGTGGCTGGGATCGTTGGCAGAGCGGACGTGTTAGC
ASCRP001410	214.667	164.5	316.333	178.667	206	191	1006.67	576	305	345	354.833	313.333	8.2624	8.33433	8.78572	8.00973	8.22462	8.37644	8.76348	8.09603	8.66329	8.68385	8.47341	7.43529	P	P	P	P	P	P	P	P	P	P	P	P	hsa_circRNA_101040	hsa_circ_0025822	exonic	chr12	-	31586088	31600703	uc001rkh.1	DENND5B	ACTTGAGGGAGGCTTCCTTTCTGTCTGACCAGCCTGAGCCTTACCT
ASCRP001413	522.833	366.667	1101.17	504.5	650.833	540.333	1937.83	2578.17	829.833	1276.67	1319.67	1163.17	9.61869	9.63302	10.6479	9.73904	9.89944	9.78149	9.94285	10.5624	10.3301	11.0864	10.8186	9.15968	P	P	P	P	P	P	P	A	A	A	P	P	hsa_circRNA_101043	hsa_circ_0025887	exonic	chr12	+	40696590	40697936	uc001rmi.3	LRRK2	AACTGAAAGAGCTGCTATGCCTTTCTTGCCTCCTTCTATGACAATC
ASCRP001418	80.8333	61.8333	57	83	76.1667	68	128.5	186	91	95.5	138.667	256.667	6.48905	6.32001	6.05516	6.64905	6.45951	6.57698	5.98413	6.41418	6.38819	6.29134	6.68935	7.15524	P	A	A	P	A	A	P	P	P	P	P	P	hsa_circRNA_101050	hsa_circ_0003770	exonic	chr12	-	49333437	49334971	uc001rsr.2	ARF3	TTGTCTTTGCAAACAAACAGGATCAAGTCTTCCATACCAGGGACCA
ASCRP001419	12956.8	9036.17	13380	12051.7	17444.3	15236.7	12723.8	16297	13033.2	10244.3	12031.7	53702	13.8955	13.9767	14.1849	14.2607	13.9153	13.9335	13.4488	14.02	14.5074	14.7049	14.1394	13.8442	P	P	P	P	P	P	P	P	P	P	P	P	hsa_circRNA_101051	hsa_circ_0026143	exonic	chr12	+	49722709	49723237	uc001rtx.4	TROAP	CCTGCCCTGGGACAGCCATGACTCCCACCTGATGCCCTCCCCTGCC
ASCRP001420	60.3333	50.5	51.5	62.3333	60.5	49.8333	105.667	109.667	77.6667	80.8333	100.5	154.333	6.00737	5.79861	5.86252	6.11714	6.05401	5.83347	5.77687	5.71642	5.9439	5.78722	5.96048	6.29737	A	A	A	P	A	A	P	P	A	A	P	P	hsa_circRNA_101052	hsa_circ_0026153	exonic	chr12	+	49883247	49884514	uc001rud.2	SPATS2	CAAGAAAAAGATAAATGCGGTACGTGCAATAGTTCCTAATAAGAGC
ASCRP001423	96.1667	67.1667	424.167	59.5	103.5	87.3333	421	219	128.5	125.5	151.167	183.333	6.8076	6.48625	9.18817	6.07326	7.06998	7.05915	7.48232	6.65337	7.18343	6.80138	6.87725	6.59694	P	A	P	P	P	P	P	P	P	M	P	P	hsa_circRNA_101055	hsa_circ_0026218	exonic	chr12	-	50529514	50537840	uc001rwd.4	CERS5	ATCCATTCTGATTTATTGCCAAACCCTGTGCACTCTGTATTGGCAT
ASCRP001425	713	511.667	744.167	598.333	898	772.833	1060.67	1506	783.5	847.667	893.167	3606.67	10.0512	10.1448	9.88531	10.0553	10.2699	10.2138	8.84923	9.58546	10.2112	10.3076	10.0589	10.3415	P	A	P	P	P	P	P	A	P	A	P	P	hsa_circRNA_101057	hsa_circ_0003222	exonic	chr12	+	50848096	50855130	uc009zlr.1	LARP4	GTAGGGGCAGGCTCCCTTTCCCAATGGTAGTTTTGTGAATGGCTTT
ASCRP001426	64.1667	60	66.3333	58.5	58.6667	57.3333	152.5	158	89.6667	106.5	110.667	136.333	6.04743	6.17243	6.34981	6.03709	5.96094	6.18023	6.15231	6.18989	6.35139	6.49124	6.22942	6.13247	A	A	A	P	A	A	M	M	P	P	M	P	hsa_circRNA_101058	hsa_circ_0026285	exonic	chr12	+	51207792	51208222	uc001rww.4	ATF1	TAATGAAAAACAGTTGCCATTGCCCCAAATGGAGCCTTACAGTTGG
ASCRP001429	134.5	108.833	113.5	121.833	144.5	115	290.333	349	162.167	171.833	187.5	474.167	7.43846	7.51204	7.2557	7.31558	7.64011	7.54631	6.99644	7.33963	7.5954	7.46973	7.28887	7.99045	P	P	P	P	P	P	P	P	P	P	P	P	hsa_circRNA_101061	hsa_circ_0004313	exonic	chr12	+	51449617	51450285	uc010smz.2	LETMD1	AGTAAAATCGGTACCTGTTTCCCAGGCAACTACTGATCAGGCATTT
ASCRP001430	203.667	145.667	290.667	152.667	167.667	150.333	1030.67	381.167	190.833	242.5	217.167	270.833	8.15473	8.10208	8.6714	7.72353	7.89775	8.0055	8.80389	7.45972	7.91356	8.06528	7.5666	7.24227	P	P	P	P	P	A	P	P	P	M	P	P	hsa_circRNA_101062	hsa_circ_0004538	exonic	chr12	-	51467605	51467865	uc001rxu.2	CSRNP2	AAGAGAAACTCCATGCCAAGAAAATGAAGCCACATCCATCCTGAAG
ASCRP001431	53	52	48.5	54.3333	50.5	47.8333	137.333	200.667	70.5	80.3333	90.1667	105.167	5.6781	5.78781	5.70557	5.92621	5.67484	5.70534	6.06201	6.52056	5.58125	5.8225	5.70203	5.69601	A	A	A	P	A	A	P	P	A	A	A	P	hsa_circRNA_101063	hsa_circ_0026302	exonic	chr12	-	51467605	51470430	uc001rxu.2	CSRNP2	AGAAAATGAAGAATCCTAATGTACCTGGCTAGCTGGTGGTGAGTAG
ASCRP001432	57.5	47.1667	59.6667	58.6667	54.6667	53.3333	102	117.5	78.6667	91.6667	103	130.333	5.83444	5.56625	6.12845	6.04126	5.79307	5.94908	5.72552	5.79792	5.97538	6.19428	6.01333	6.05193	A	A	A	A	A	A	P	P	A	P	A	P	hsa_circRNA_101064	hsa_circ_0026309	exonic	chr12	-	51497452	51497986	uc001rxv.2	TFCP2	TTCACAAGGCTTTTCACAAACTTCTCAGAAATGGTTCACCAAACCA
ASCRP001434	9709.33	4227	2585.83	8469.33	5544.67	4106.33	20252.8	23560	3583.83	2649.67	6054	33940	13.4867	12.9578	11.9782	13.7041	12.3972	12.2618	14.3621	14.6691	12.7138	12.3751	13.0785	13.2206	P	P	P	P	P	P	P	P	P	P	P	M	hsa_circRNA_101066	hsa_circ_0026337	exonic	chr12	+	52180325	52188425	uc001ryw.3	SCN8A	TGGTAGTCATCCTCTCCATTGTGGGTGGTGGTGAATGCCTTGGTGG
ASCRP001435	96.3333	76.3333	67	85	81.8333	77.5	209	224.833	92.5	103.833	127.5	307.833	6.84201	6.78319	6.36352	6.62252	6.58055	6.83841	6.5757	6.69051	6.44405	6.47595	6.48788	7.4118	P	P	A	P	M	P	P	P	P	P	P	P	hsa_circRNA_101067	hsa_circ_0003729	exonic	chr12	+	52380601	52385777	uc001rzn.3	ACVR1B	GAGTTATGAGATACATGGCCCCTGAAGTACTTGATGAAACCATTAA
ASCRP001436	86.3333	56.3333	46.6667	73.3333	67.3333	60.5	149.833	163.333	78.1667	80.1667	96	188	6.63262	6.01301	5.73385	6.39812	6.25957	6.26187	6.17286	6.26481	5.98428	5.79685	5.83732	6.63519	P	A	A	P	P	A	P	P	A	A	A	P	hsa_circRNA_101068	hsa_circ_0026349	exonic	chr12	+	52385646	52385777	uc001rzn.3	ACVR1B	GAGTTATGAGGAGTCCATGAAGAATATCAGCTGCCATATTACGACT
ASCRP001438	79.1667	57.8333	51.1667	66.1667	113.333	52	156	265	73	78.3333	109.833	178.667	6.39887	6.12084	5.82719	6.2407	6.80304	5.83555	6.20312	6.90515	5.67866	5.69661	6.20099	6.53887	A	A	A	A	A	A	P	P	A	A	P	P	hsa_circRNA_101070	hsa_circ_0026512	exonic	chr12	+	53413693	53416411	uc009zmp.1	EIF4B	AGAAGAGGTGATGATAGCTTTGGAGACAATCAGTGCAGTGCGTTTA
ASCRP001440	105.333	85.5	101.5	90.8333	111.167	119.333	232	187.5	110.333	139.333	163	294.5	6.97643	6.98853	7.06395	6.79335	7.21196	7.62818	6.70659	6.41664	6.84911	7.07776	7.01323	7.33274	P	P	A	P	P	P	P	P	P	A	P	P	hsa_circRNA_101072	hsa_circ_0026524	exonic	chr12	+	53421565	53431406	uc001sbh.4	EIF4B	CAGTCCCCTACAAGAGTATCGAGATCGTTATGATTCAGACCGGTAT
ASCRP001441	65	53	66.1667	55.6667	63.5	56.3333	123.667	151	97.6667	112.5	118.167	168.5	6.08502	5.75392	6.35001	5.93816	6.11921	6.14649	5.94298	6.12179	6.6108	6.6119	6.32796	6.46079	A	A	A	P	A	A	P	M	P	P	P	P	hsa_circRNA_101073	hsa_circ_0026542	exonic	chr12	+	53448969	53449629	uc001sbo.1	TENC1	TCTCTGCAGGCTCTTCAACCTTTCAGAGAAAAGGCATGACCTGACC
ASCRP001443	188.833	158.333	290.5	211.167	246.833	275.667	411.667	467.5	352	368.667	311.833	371.667	8.0631	8.24419	8.65571	8.38171	8.52153	8.97025	7.44466	7.78137	8.85455	8.80721	8.23193	7.68064	P	P	P	P	P	P	P	P	P	P	P	P	hsa_circRNA_101075	hsa_circ_0026640	exonic	chr12	+	53848509	53865591	uc001sdb.4	PCBP2	AATCAATGTCAGTTTTTGGCTTTCACCCCCAACCAGTGACCAAAGA
ASCRP001444	1224.67	836.5	1040.33	1803.17	1988.83	2042.67	1417	1720.83	2339.5	1352.17	1175.83	6494.83	10.76	10.8818	10.5454	11.6113	11.2841	11.4486	9.36678	9.85529	11.8758	11.1929	10.5791	10.9713	P	P	P	P	M	A	P	P	P	P	A	P	hsa_circRNA_101076	hsa_circ_0026652	exonic	chr12	+	53856276	53862616	uc001sdk.4	PCBP2	TCCAAACGATTCCCCCCCGAAGGGCGTGACCATCCCGTACCGGCCC
ASCRP001445	59.6667	51.1667	56.3333	48.6667	51.6667	49.6667	134.167	148.667	78.3333	93.3333	105	113.833	5.92753	5.74126	6.03532	5.73517	5.68172	5.84171	6.02327	6.12779	5.90708	6.23401	6.04021	5.86986	A	A	A	A	A	A	P	P	A	P	P	P	hsa_circRNA_101077	hsa_circ_0026911	exonic	chr12	-	56604080	56604352	uc010sqg.2	RNF41	ACAGGGCTGTGGGCACCTCATTGTGAACATGCTTTCTGCAACGCCT
ASCRP001446	124.667	89.5	224.667	93.1667	135.667	119.667	217.667	233	156.333	192.167	209.833	199.333	7.30324	7.10543	8.28678	6.81544	7.54327	7.63001	6.62322	6.71449	7.55601	7.68384	7.4851	6.7223	P	P	P	P	P	P	A	M	P	P	P	P	hsa_circRNA_101078	hsa_circ_0026978	exonic	chr12	-	56669779	56676775	uc001skr.1	CS	CCATCCACAGGGCATCCGTTTCCGAGGCTTTAGTATCCCTGAATGC
ASCRP001448	71	54.3333	48.1667	70.6667	62.5	60.6667	191	171	75	83.3333	107	218.833	6.26944	6.04567	5.73883	6.34928	6.04678	6.21031	6.45725	6.29441	5.82315	5.88785	6.14994	6.89737	P	A	A	P	A	A	P	M	A	A	M	P	hsa_circRNA_101080	hsa_circ_0008085	exonic	chr12	-	56742312	56743420	uc001slc.3	STAT2	GGAATGATGGACTCTGGTGGAGCAACGTTCAGGTGGTTCAGGAAAG
ASCRP001451	48.1667	41.1667	41	54.5	53.5	42.6667	99	107.333	75.3333	69.5	100.167	114	5.44375	5.28597	5.39832	5.8766	5.75963	5.37713	5.69904	5.64241	5.78296	5.36811	5.98844	5.89412	A	A	A	P	A	A	P	M	A	A	A	P	hsa_circRNA_101083	hsa_circ_0027033	exonic	chr12	+	56962758	56965639	uc001sln.2	RBMS2	TTGGCTTTGCAAGATATGGCAAGATTGTTTCCACTAAGGCCATACT
ASCRP001453	91.1667	51.6667	50.5	133.333	89.1667	69.1667	191	158.333	78.6667	87	171.5	277.667	6.70911	5.82182	5.7795	7.47627	6.78023	6.59141	6.46275	6.19935	5.94866	6.04806	7.11593	7.2736	P	A	A	P	P	P	P	P	A	P	P	P	hsa_circRNA_101085	hsa_circ_0027089	exonic	chr12	-	57059987	57064148	uc001slu.4	PTGES3	GAGCAGATGATCTTAATTGGCTTAGTGTCGACTTCAATAATTGGAA
ASCRP001456	81.8333	68	76	76.8333	72.6667	64.5	226	218	81	94.3333	113.5	130.333	6.49814	6.52071	6.54378	6.51337	6.3744	6.38417	6.68044	6.63303	6.04054	6.25706	6.23236	6.0508	P	A	P	P	P	A	P	P	A	P	P	P	hsa_circRNA_101088	hsa_circ_0005358	exonic	chr12	+	57861115	57862007	uc001snx.3	GLI1	TGTGCCAGAGGGTGCCATGTTTGAAGGGTGCCGGAAGTCATACTCA
ASCRP001458	244.833	150.667	237.5	181.667	211.333	173.5	495.333	569.667	234.333	353.833	344.833	547.667	8.48435	8.16223	8.39001	8.05406	8.27526	8.24555	7.71395	8.07728	8.27689	8.7265	8.42713	8.21424	P	P	P	P	P	P	P	P	M	P	P	P	hsa_circRNA_101090	hsa_circ_0027355	exonic	chr12	+	62743001	62749256	uc001src.2	USP15	AGCTATTCAGGTCCCCAGGTGCATCCAATTTTTCAACTTTACCAAA
ASCRP001460	67.3333	59.6667	66	61	65.5	57.1667	363.833	643.167	91.3333	121.5	148.833	205.667	6.10067	6.11842	6.30547	6.08886	6.21557	6.14477	7.26994	8.25288	6.3833	6.784	6.82766	6.7871	P	A	A	P	P	A	P	P	P	P	P	P	hsa_circRNA_101092	hsa_circ_0008594	exonic	chr12	+	64456696	64509673	uc001srv.2	SRGAP1	AGTGAAGATGTGCTGTGATCTTGGCTACCATGCAAGTCTGAACAGA
ASCRP001462	1462.17	1091.67	1305	1062.83	1593.5	1615.33	2897.17	3141.67	1067.33	935.5	1297.83	11517.8	11.0523	11.2409	10.9767	10.8685	10.9808	11.1914	10.5935	11.0769	10.7544	10.4744	10.7761	11.6497	P	P	P	P	P	P	P	P	P	P	P	M	hsa_circRNA_101094	hsa_circ_0027478	exonic	chr12	+	69109406	69125499	uc001suf.3	NUP107	CACTACTGAGGACCCTGATGCTCCCATAAGACAGAAAATGCCCCTT
ASCRP001470	65	56.1667	55	65	65.6667	55	108	138.333	76	73.8333	100.5	194.5	6.09584	6.10463	5.96011	6.2203	6.20295	6.02059	5.80686	6.01653	5.81117	5.55188	5.97629	6.68578	A	A	A	P	A	A	P	P	A	A	A	P	hsa_circRNA_101102	hsa_circ_0000419	exonic	chr12	+	70193988	70195501	uc001svm.3	RAB3IP	GAGGACCAAAGCTGACTTATCCTTGTATAATGAATTCCGATTGTGG
ASCRP001471	56	52.6667	44.1667	54	56.3333	51.3333	99.8333	118	71.6667	78.5	112.333	226	5.76182	5.86574	5.53095	5.89347	5.88106	5.76018	5.73068	5.82268	5.63897	5.64936	6.20183	6.94064	A	A	A	A	A	A	P	P	A	A	P	P	hsa_circRNA_101103	hsa_circ_0007127	exonic	chr12	+	70671911	70704797	uc001svv.3	CNOT2	TCTTCTATGTTTCCACATCGGTCAGAAAAAGATAGGGAGACGTGGT
ASCRP001473	60.3333	61.3333	59.5	50.5	56.3333	52.6667	101.833	109.833	82	88.3333	83	105.167	5.94306	6.1957	6.1085	5.76088	5.82453	5.87171	5.74744	5.72576	6.12963	6.10441	5.48716	5.73847	A	A	A	A	A	A	P	P	A	P	A	P	hsa_circRNA_101106	hsa_circ_0005450	exonic	chr12	+	78334098	78401225	uc001syo.3	NAV3	TCATTTACAGATTTACACTGACTGGGCCAACCACTACCTAGCAAAA
ASCRP001480	124.5	65.5	50.6667	191.167	158	79.1667	206.667	262.833	85.6667	91.3333	250.667	366	7.30445	6.39176	5.83346	8.15852	7.7858	6.87203	6.56071	6.90954	6.24802	6.12298	7.86295	7.6579	P	A	A	P	P	P	P	P	P	P	P	P	hsa_circRNA_101113	hsa_circ_0002886	exonic	chr12	+	83250788	83251359	uc001szr.1	TMTC2	TTACCTACCATTTACAAACCGTGCTATCAAGACTAATCAGGACCTT
ASCRP001481	79.3333	67.3333	67.3333	75.8333	71	57.6667	320.833	344.833	83.6667	98.3333	116.667	167.5	6.44127	6.52278	6.3712	6.46878	6.38042	6.09051	7.10815	7.31685	6.03926	6.29567	6.28504	6.42155	P	A	A	P	P	A	P	P	A	M	P	A	hsa_circRNA_101114	hsa_circ_0008916	exonic	chr12	+	93788384	93789309	uc001tcn.3	NUDT4	ACTTCTGGGCATATTTGAGGTGCTGCTGGTGAGTAGCAGCCGGTAC
ASCRP001482	408.333	291.5	410.5	439	477.167	471.333	1016	916.167	410.833	499.167	469.5	727.833	9.28683	9.26384	9.17737	9.53875	9.46548	9.57872	8.78198	8.78266	9.13997	9.307	8.95855	8.55646	A	P	M	P	P	P	P	P	P	P	P	P	hsa_circRNA_101115	hsa_circ_0027774	exonic	chr12	+	95879654	95897937	uc001tec.3	METAP2	TGGGAAGACATATCAAGCAAAAGTTCAAACAGACCCTCCCTCAGTT
ASCRP001484	87.8333	69.3333	93	74.1667	80.8333	83.1667	263.5	235.333	120	148.333	152	167	6.63798	6.57008	6.89439	6.43898	6.61073	6.93512	6.87909	6.74218	7.0345	7.21045	6.87153	6.4389	P	A	P	P	P	P	P	M	P	P	P	P	hsa_circRNA_101117	hsa_circ_0006419	exonic	chr12	-	96076482	96077487	uc001tei.3	NTN4	CTACACTCAGCGTGTTCCTGCCATCCAGTAGGATCAGCTGTCCTTC
ASCRP001486	58.5	52	44.3333	72.6667	61.3333	52.1667	107.833	140	71.6667	79	109.833	166.333	5.85073	5.86474	5.46213	6.35886	5.99462	5.81506	5.78566	6.01993	5.65414	5.74115	6.18333	6.40145	A	A	A	P	A	A	P	P	A	A	P	P	hsa_circRNA_101119	hsa_circ_0002762	exonic	chr12	-	96717725	96728643	uc001tep.2	CDK17	GGAAGCAGATTAGGATTTTTCAAGCCACATTCAATTGATAGGATGA
ASCRP001492	87.3333	77.5	68.3333	86.3333	77.1667	73.6667	157.333	252	105.833	114.167	121	149	6.60179	6.75895	6.40863	6.68072	6.518	6.69471	6.20198	6.84362	6.74713	6.65708	6.4063	6.2232	M	P	A	P	P	P	P	P	P	A	P	A	hsa_circRNA_101125	hsa_circ_0000431	exonic	chr12	+	102301963	102308010	uc001tix.3	DRAM1	AAGAGAAAAGGAGTTAGCTGTGCCAGTGGTTCATGACGGGGGCGCT
ASCRP001494	128.333	110.5	96.6667	151.667	122	98.6667	1125	1535.33	128.167	167.667	237	375	7.34392	7.53845	6.96637	7.70682	7.3713	7.29539	8.96684	9.62298	7.19998	7.44616	7.74	7.68367	P	P	P	P	P	P	P	P	P	P	P	P	hsa_circRNA_101127	hsa_circ_0028048	exonic	chr12	-	108138319	108140201	uc001tmp.3	PRDM4	AACCATATCTGGAAGGGTGTACTCTGTGTGACCGCGCCTATCCCTC
ASCRP001495	147	65.6667	65.5	298.5	164.667	134.5	346	337.167	123.333	111.333	449	764.167	7.62792	6.41078	6.29887	8.8963	7.84619	7.85766	7.20129	7.27275	7.08988	6.59007	8.87389	8.62564	P	A	A	P	P	P	P	P	P	P	P	P	hsa_circRNA_101128	hsa_circ_0000437	exonic	chr12	-	109046047	109048186	uc001tnj.3	CORO1C	AGATTGCCAGAAAAATATGCAGGAACCAATTGCTCTTCATGAGATG
ASCRP001502	112	97.8333	85.5	129	102.167	75.5	846.167	1694.67	103	130.667	188.167	345	7.09896	7.27854	6.77267	7.42595	7.02491	6.7281	8.49731	9.8189	6.72886	6.98076	7.31829	7.56959	P	A	P	P	P	P	P	M	P	P	M	A	hsa_circRNA_101136	hsa_circ_0028123	exonic	chr12	+	109660311	109661709	uc001tob.3	ACACB	AAACAAAGTCGTGTGCATGGCGTCCTTGGAGGATGAGCTGTGTGGC
ASCRP001504	209.5	157.5	223.333	193	251.167	218.5	298	332.667	238	264.333	273	406.333	8.1993	8.23504	8.27449	8.18708	8.56484	8.61174	7.02329	7.24685	8.29371	8.21192	8.01703	7.79717	P	P	P	P	P	P	P	P	P	P	P	A	hsa_circRNA_101138	hsa_circ_0028135	exonic	chr12	+	109926376	109945540	uc001too.1	UBE3B	TTCTGTGACTGTTCGCGGCACCTCATCACCCTGAAATCCTGCAGGA
ASCRP001505	686.667	181.667	302.833	236.167	254.5	290	2724.33	2047.67	257.5	500.333	601	1573.17	9.99298	8.4771	8.71781	8.5683	8.57775	9.03111	10.4961	10.1502	8.41733	9.31147	9.38164	9.53582	P	P	P	P	P	P	P	P	M	P	P	P	hsa_circRNA_101139	hsa_circ_0028173	exonic	chr12	+	110764194	110780253	uc001tqk.4	ATP2A2	AAGTTGTCTGGTGAATCTGTCTCTGTCATCAAGCACACTGATCCCG
ASCRP001507	9865.33	6846.17	8917.33	9022.67	16513.3	14523.7	5578	7618	7736	4657.83	6782.5	72624.7	13.5107	13.5436	13.599	13.8304	13.8369	13.8515	12.159	12.9225	13.8316	13.32	13.3541	14.2989	P	P	P	P	M	P	P	P	P	P	P	M	hsa_circRNA_101141	hsa_circ_0005785	exonic	chr12	-	110819556	110834257	uc001tqo.2	ANAPC7	CTTAGATTGTTATGAAGTGAGTTATTCTCCCCACCTCAGAAGTACC
ASCRP001508	5751.67	2931.67	3961.33	4063.67	6659.67	6211.5	5844.5	9925.17	3335.33	1942	3863.5	82985.7	12.7677	12.5682	12.5144	12.6815	12.6997	12.6972	12.2504	13.2652	12.556	11.83	12.4886	14.6858	A	P	P	P	P	P	M	P	P	P	P	A	hsa_circRNA_101142	hsa_circ_0028190	exonic	chr12	-	110820647	110834257	uc001tqo.2	ANAPC7	CCGTGGGTGGTTTCTGGTGAGTTATTCTCCCCACCTCAGAAGTACC
ASCRP001510	13261.3	9162.5	12221.3	11222	21711.5	17868.3	8683.33	10826	9796.83	5821.5	9546.33	83593.8	13.9471	13.9988	14.0821	14.1094	14.2431	14.2181	12.9738	13.3758	14.0844	13.7961	13.8119	14.7229	P	P	M	P	P	M	P	P	P	P	P	M	hsa_circRNA_101144	hsa_circ_0028196	exonic	chr12	-	110826316	110834257	uc001tqo.2	ANAPC7	CCTTGATGCCATTCTAGTGAGTTATTCTCCCCACCTCAGAAGTACC
ASCRP001511	11564.2	7702.33	10512.3	10305.3	18469.7	16596.3	6114.5	8073	9579.33	5100.67	8372.67	77657.8	13.7745	13.8069	13.9063	13.9825	13.998	14.0638	12.3574	13.0352	14.0266	13.4857	13.6566	14.5497	M	P	M	P	M	M	P	P	P	P	A	M	hsa_circRNA_101145	hsa_circ_0028198	exonic	chr12	-	110832905	110834257	uc001tqo.2	ANAPC7	AAGACAAAGAACTCCCAAATGAGTTATTCTCCCCACCTCAGAAGTA
ASCRP001512	61.3333	53.6667	50.3333	62.8333	61.3333	52.6667	89.8333	108.167	77.6667	80	100.833	107.667	5.87416	5.94342	5.82138	6.13617	6.03941	5.89995	5.59387	5.71314	5.92395	5.77037	6.00901	5.76932	A	A	A	P	A	A	P	P	A	A	P	P	hsa_circRNA_101146	hsa_circ_0002273	exonic	chr12	-	111923074	111924628	uc001tsh.3	ATXN2	TATAGAGCAGGCAAGTTAGGAAATCAACATTGAATCCCAATGCAAA
ASCRP001513	89	73.8333	73.1667	76.6667	83.8333	71.3333	223.167	215.833	97.8333	114.5	131.833	158.167	6.64583	6.67871	6.54062	6.48331	6.66186	6.6358	6.65863	6.6189	6.60259	6.66819	6.55924	6.32145	P	P	A	P	P	P	P	P	P	P	P	M	hsa_circRNA_101147	hsa_circ_0028255	exonic	chr12	-	111923074	111948386	uc001tsh.3	ATXN2	TATAGAGCAGTTCCAAGATTATCCCCTAAAACTCATAGACCCAGGT
ASCRP001517	61.8333	52.8333	60	58.3333	54.8333	52.6667	163.333	213.667	69.5	82.1667	96.8333	167.333	5.98343	5.90285	6.11701	6.04815	5.82569	5.9673	6.26725	6.5985	5.54301	5.83266	5.88325	6.4455	A	A	A	P	A	A	P	P	A	A	A	P	hsa_circRNA_101154	hsa_circ_0002488	exonic	chr12	+	112321384	112321572	uc001tsz.3	MAPKAPK5	TTGTGAGGAAAGCTGTGACTTGTGGTCCCTAGGGGTGATTATCTAT
ASCRP001518	73.8333	70	104.167	59.1667	77.6667	71.1667	139.833	188.167	108.667	128.667	131.667	123	6.35321	6.60928	7.08726	6.03462	6.5128	6.65135	6.0769	6.44342	6.80656	6.85674	6.59854	5.97282	P	A	P	P	P	P	P	P	P	A	P	P	hsa_circRNA_101155	hsa_circ_0004206	exonic	chr12	-	112371689	112381173	uc001ttc.2	TMEM116	TTTGCTGCTGGGGCCCAGATATTCTACATTTCCTCATTTCTCTACA
ASCRP001522	178.167	115.333	239.667	178	198.5	177.333	426	373.333	239	328.333	312	345.333	7.96662	7.62464	8.38599	8.01972	8.16975	8.27429	7.49907	7.4261	8.30001	8.57783	8.23148	7.55601	P	P	P	P	P	P	P	P	P	P	P	P	hsa_circRNA_101159	hsa_circ_0002857	exonic	chr12	+	113705647	113707650	uc001tuw.3	TPCN1	ATGATCATCTTTGCCATCCTCGGTCCACGCCACCCTGGAGCTGTTT
ASCRP001524	259	197.333	270.167	265.333	265.167	246.667	767.833	860.833	299.667	432	469.833	824.333	8.58397	8.61728	8.55965	8.72402	8.6319	8.80522	8.34871	8.69471	8.64598	9.06847	8.96284	8.73775	P	P	P	P	P	P	P	P	P	P	P	P	hsa_circRNA_101161	hsa_circ_0028540	exonic	chr12	-	114384158	114385269	uc001tvm.3	RBM19	AGGACAAAGCCAACAGTGCCAGGTCCCCTGTCTGAGCTCCACTACC
ASCRP001526	61.6667	54.1667	47.8333	63.6667	66.6667	50.1667	120.5	131.167	77.6667	81.5	101.667	220.5	5.93244	5.90317	5.69519	6.16708	6.19527	5.76013	5.91019	5.95649	5.94902	5.89358	6.00146	6.90623	A	A	A	P	P	A	P	P	A	A	P	P	hsa_circRNA_101163	hsa_circ_0028587	exonic	chr12	-	116675272	116675510	uc001tvw.3	MED13L	TGTAATACATCATGAACTGCAGGGCTGAACTCACGGGAATCAAATG
ASCRP001527	11992.5	6278.33	10173.8	6264.67	15621.2	9820.33	19686.2	13164	5915.67	7019.17	13472.5	81323.7	13.8207	13.371	13.8373	13.3118	13.7519	13.5199	14.3312	13.5977	13.4093	14.0655	14.2615	14.6213	P	P	P	P	P	P	P	P	P	M	M	M	hsa_circRNA_101164	hsa_circ_0028602	exonic	chr12	+	117273764	117274087	uc001twc.4	RNFT2	AGCCTCTGATTCTCCTGTGCCAGTCCTTCGACATCTGTGGACGTGT
ASCRP001528	68.6667	55.5	63.3333	59.5	68.5	55.3333	176.5	175	85.3333	99.3333	119.5	163	6.17636	6.04483	6.14933	6.03618	6.30448	6.07591	6.36038	6.35263	6.18874	6.30648	6.36348	6.40667	A	A	A	P	P	A	P	P	P	A	P	P	hsa_circRNA_101165	hsa_circ_0028605	exonic	chr12	+	117365827	117387511	uc001twf.1	FBXW8	TCATTGCGGGAATGAAATGAATGATGTGCCTTTCTTTGATATCCAA
ASCRP001530	56.3333	58.3333	51.6667	71.8333	59.6667	48.8333	357.333	668.167	79.3333	82.5	105.667	140.5	5.81005	6.18871	5.85306	6.40578	6.02139	5.65189	7.23577	8.299	5.96691	5.86267	6.10365	6.1896	A	A	A	P	A	A	P	P	A	P	A	P	hsa_circRNA_101167	hsa_circ_0005916	exonic	chr12	+	117402501	117426674	uc001twf.1	FBXW8	AAGGAAGCAAGATATACATCAGGGGATGTGAGAGTGTGGGACACCC
ASCRP001533	126.333	80.6667	77.1667	78	80.6667	63	541.667	145.5	102.833	131.333	128	204.667	7.33784	6.89049	6.60536	6.4959	6.59465	6.3404	7.84254	6.11885	6.74268	6.95286	6.48694	6.78787	P	P	P	P	P	A	P	P	P	P	P	P	hsa_circRNA_101170	hsa_circ_0007681	exonic	chr12	-	118474142	118476193	uc001twr.2	WSB2	GGTCACTCCAGTAAACAGATTCAAGTGTTATCGGGCCACCTGCAGT
ASCRP001534	71	61.8333	72	67	84.5	58.6667	169.5	214.167	75.3333	86.6667	104	124.667	6.29025	6.28496	6.48911	6.23253	6.66394	6.13455	6.29731	6.61459	5.81117	6.03201	6.0222	5.98462	P	A	P	P	P	A	P	P	A	A	P	P	hsa_circRNA_101171	hsa_circ_0028644	exonic	chr12	-	118533337	118533619	uc001tws.3	VSIG10	CAGGTGGCCAGATTGGAGGCTGTTGTCATTGGAGAAGTTCATGAGA
ASCRP001537	115.167	94.1667	111	97.3333	90.6667	91.6667	335.833	269.667	111.667	131	173.333	259.667	7.13406	7.20237	7.19184	6.91217	6.78915	7.11671	7.16548	6.93938	6.92801	6.94527	7.14356	7.17165	P	P	P	P	P	P	P	P	P	P	P	P	hsa_circRNA_101174	hsa_circ_0028864	exonic	chr12	-	120636920	120637008	uc001txp.3	RPLP0	GGCCAATAAGACTGCTGCCTCATATCCGGGGGAATGTGGGCTTTGT
ASCRP001538	231.667	140.167	995.667	175.833	265.167	244.333	701.333	368.667	353	313.167	379.833	324.333	8.38377	8.03288	10.4245	7.98068	8.64278	8.77936	8.20546	7.40906	8.86517	8.48149	8.60303	7.48118	P	P	P	P	P	P	P	P	P	P	P	P	hsa_circRNA_101175	hsa_circ_0028899	exonic	chr12	+	120995084	120995485	uc001tyq.4	RNF10	AATGTAGACCATCCCATTCATCTAGGAGCGCATTTGTAGCCATGAA
ASCRP001539	72	56.1667	62.8333	68.1667	70	61.6667	142.5	137.167	82.1667	89.3333	116.5	151.667	6.25576	6.02285	6.21334	6.29457	6.33526	6.26038	6.09433	6.01291	6.08427	6.12913	6.28559	6.27069	P	A	A	P	P	A	P	P	P	P	P	P	hsa_circRNA_101176	hsa_circ_0008803	exonic	chr12	+	120995084	120998689	uc001tyq.4	RNF10	GGAGCTCAAGCGCATTTGTAGCCATGAAGTGCCATCTTGCCCAATA
ASCRP001540	117.667	104	96	110.333	103.667	92.8333	343.333	417	127	134.333	158	297.333	7.20522	7.40517	6.96478	7.13863	7.06735	7.16912	7.19129	7.60082	7.1695	6.9978	6.95419	7.36919	P	P	P	P	P	P	P	P	A	P	P	A	hsa_circRNA_101177	hsa_circ_0006390	exonic	chr12	+	121000747	121001746	uc001tyq.4	RNF10	AGATTGCTGGCTACTCCATGTCTGAGACTCGGGAAGAGGCTCTGTC
ASCRP001541	97.8333	72.1667	86.6667	75.6667	88	73.1667	309	185.333	105.167	119.167	133.5	202.333	6.79254	6.64495	6.75902	6.45685	6.73177	6.72754	7.07341	6.41874	6.77812	6.75431	6.58512	6.76137	P	P	P	P	P	P	P	P	P	P	P	P	hsa_circRNA_101178	hsa_circ_0005043	exonic	chr12	+	121002874	121009094	uc001tyq.4	RNF10	CTTTGCCCAGGATGTTCGACAGCGTCACAGATATCTCTCTCACTTG
ASCRP001542	453.833	314.333	541.833	392.667	468.5	418.833	916.5	857.167	410.5	627.167	576.333	957.667	9.42753	9.38753	9.46186	9.38509	9.43642	9.43061	8.6169	8.67951	9.13214	9.72358	9.25326	8.93409	P	P	P	P	P	P	P	P	P	P	P	P	hsa_circRNA_101179	hsa_circ_0028912	exonic	chr12	+	121004627	121009094	uc001tyq.4	RNF10	CTTTGCCCAGACCCAGAAGTCCACATTCCCCTCGAGAATCTACAGC
ASCRP001544	62.3333	52	51.6667	58.5	59.1667	48.5	119.833	140.5	81.6667	88	106.667	133	5.94384	5.77477	5.8049	5.99838	5.96685	5.7252	5.9064	6.0378	6.07709	6.01448	6.07659	6.06909	A	A	A	P	A	A	P	P	P	P	P	P	hsa_circRNA_101181	hsa_circ_0003472	exonic	chr12	-	121220457	121222396	uc001tzd.3	SPPL3	ATTGGCTTCTCATGGATGGCATCCAAACAATTGACTCTACCCAGGC
ASCRP001546	61	50.5	65	57	62.6667	57.1667	150.667	166	93.1667	107.167	117	142.167	5.95222	5.77772	6.3246	5.94814	6.04453	6.18721	6.15481	6.28902	6.38835	6.48934	6.35969	6.17775	A	A	A	A	A	A	P	P	P	P	P	P	hsa_circRNA_101183	hsa_circ_0002179	exonic	chr12	-	121220457	121248689	uc001tzd.3	SPPL3	CTCATGGATGGGCCTATTCCCTGGTGGATTCCAGTCAAGTGTCTAC
ASCRP001547	243.333	120.833	182.167	136.667	148.333	191.667	306	261.667	207.333	247.833	231.167	574.5	8.46209	7.71019	7.95493	7.49281	7.67467	8.39729	7.04268	6.89179	8.03074	8.1058	7.70526	8.19748	P	P	P	M	P	P	M	M	P	P	M	P	hsa_circRNA_101184	hsa_circ_0028944	exonic	chr12	+	121659715	121659969	uc001tzr.3	P2RX4	CACAGCAACGGAGGAAAACTCCCTCTTCGTCATGACCAACGTGATC
ASCRP001548	73.5	63	63.5	56.3333	63.1667	62.3333	174.5	161.333	83.6667	104.333	109.333	116.667	6.30862	6.30274	6.24816	5.96928	6.14992	6.38056	6.33381	6.2418	6.12577	6.42685	6.12998	5.93199	P	A	A	M	A	A	P	P	A	P	P	P	hsa_circRNA_101185	hsa_circ_0028965	exonic	chr12	-	121756079	121756227	uc001uae.3	ANAPC5	ACTTGGCTTTTGCGCAGTGTCCTACTGTCCGTGGCAGAGCTGTACT
ASCRP001550	61	53.8333	57.3333	50.5	57.5	52	224.5	120.5	80.3333	87.6667	98.3333	113.667	5.91033	5.96531	6.03989	5.76919	5.93856	5.83234	6.67382	5.83281	5.99194	6.00777	5.87024	5.83535	A	A	A	A	A	A	P	P	A	P	A	P	hsa_circRNA_101187	hsa_circ_0006030	exonic	chr12	+	122181534	122190129	uc009zxh.3	TMEM120B	GATTTGTCCTTCACTACAGGAGACGCACAGGATCTACAAGCAGAAG
ASCRP001555	141	123.5	94.6667	134.167	129.667	133	123.667	243.5	171.5	157	224	222.667	7.52835	7.73923	6.92507	7.48839	7.46248	7.82306	5.93287	6.78757	7.6934	7.34188	7.62661	6.92941	P	P	P	P	P	P	P	P	P	M	P	P	hsa_circRNA_101192	hsa_circ_0005465	exonic	chr12	-	122861935	122865105	uc001ucg.2	CLIP1	CAGAGTATTGATTTAATCCAGAGACTGACTTCACTATAGAACCCAC
ASCRP001556	56.3333	48.3333	58.1667	58.5	58.8333	49.3333	139	184.667	86.1667	92.6667	94.1667	94.3333	5.77807	5.63718	6.09646	6.00252	5.99982	5.78787	6.06709	6.28831	6.25846	6.18994	5.83949	5.55093	A	A	A	P	A	A	P	A	P	P	A	A	hsa_circRNA_101193	hsa_circ_0029072	exonic	chr12	-	122962387	122962839	uc001ucm.3	ZCCHC8	CTCGATTCAGGAATGGAGGATCTTTGGTTCCATACCAATGCAGGCA
ASCRP001564	7874.17	5409	7418	7288.67	9840.17	7853.83	14092	15201.8	7506.67	6384.83	7837	28527.7	13.1512	13.1125	13.3371	13.4765	13.2125	13.1258	13.8274	13.9041	13.7707	13.9202	13.5508	12.9667	A	P	P	P	P	A	P	P	P	P	P	P	hsa_circRNA_101201	hsa_circ_0029325	exonic	chr12	-	125270902	125284788	uc001ugm.4	SCARB1	TCATCTGCCAAATCCGGAGCCAAGTGCCCCCTTGTTTCTCTCCCAT
ASCRP001565	59	53	55.8333	53.6667	63.1667	52.5	129.667	131	84.1667	88.3333	106.333	173.333	5.88526	5.89231	5.96867	5.85122	6.08443	5.96052	5.9776	5.94124	6.13292	6.07951	6.04379	6.50136	A	A	A	P	A	A	P	P	A	P	P	P	hsa_circRNA_101202	hsa_circ_0029340	exonic	chr12	-	125292306	125294835	uc001ugp.3	SCARB1	TGCAGGTTCAGTTGACTTCTGGCATTCCGATCAGTGCAACATGATC
ASCRP001567	68.5	63.3333	60.8333	60.3333	55.8333	53.8333	119	111	79.8333	88.5	95.6667	105.5	6.21433	6.31117	6.20936	6.09774	5.84741	5.96996	5.90597	5.74868	5.96437	6.03436	5.84674	5.7178	A	A	A	P	A	A	P	P	A	P	A	P	hsa_circRNA_101204	hsa_circ_0029346	exonic	chr12	-	125296415	125302253	uc001ugp.3	SCARB1	ACAAGTGGAACGGGCTGAGCAAGAACGTGCGCATCGACCCCAGTAG
ASCRP001568	215.667	159.333	146.667	217.667	170.167	134.333	1184.5	1880.17	163.5	189.333	282.833	629.333	8.26443	8.23369	7.63181	8.43319	7.89763	7.85453	9.06448	10.0074	7.60999	7.65976	8.06919	8.36895	P	A	A	P	M	P	M	P	P	P	P	M	hsa_circRNA_101205	hsa_circ_0006078	exonic	chr12	+	125587224	125591814	uc009zyh.3	AACS	TTCCGCTGGGGGTGTGCTGGACCGGTTTTCTCAAATTCAGCCAAAG
ASCRP001569	74.1667	62.3333	92.5	71.3333	85.6667	75.3333	140.833	143	110.833	141.333	138.667	123.333	6.34248	6.3263	6.90249	6.3776	6.74195	6.73429	6.09758	6.06083	6.86351	7.10987	6.69881	5.99365	P	A	P	P	P	P	P	P	P	P	P	P	hsa_circRNA_101206	hsa_circ_0029377	exonic	chr12	+	125599022	125603311	uc009zyh.3	AACS	ACAGGATAGGGGCACCCTCATCCAGCATCTGAAGGAGCACCTGCTG
ASCRP001570	55.1667	48.3333	54.8333	47.8333	57	57.3333	275.5	128.667	180.333	152.667	176	184.333	5.71102	5.5895	5.96856	5.68369	5.88401	6.11074	6.93682	5.94558	7.79997	7.25626	7.18635	6.60237	A	A	A	A	A	A	P	P	P	P	P	A	hsa_circRNA_101207	hsa_circ_0006689	exonic	chr12	-	129293332	129299615	uc001uhu.2	SLC15A4	TCATGTGCTCGGCCTTTGCTGCAGGTTAAAGATCGAGGTCCGGAAG
ASCRP001573	69.6667	72.5	71.8333	62	68.3333	63.6667	131	131.333	76.6667	83.8333	103	118.833	6.22294	6.65236	6.46731	6.13269	6.23748	6.3887	5.99754	5.9515	5.84009	5.92247	6.03339	5.92542	P	A	P	P	A	A	P	P	A	A	A	P	hsa_circRNA_101210	hsa_circ_0029405	exonic	chr12	+	129399477	129411699	uc001uhy.1	GLT1D1	ATTGTGGGTCCTGAAGAATTGCAACAACACCAAACGCCGCTTTTAA
ASCRP001576	4041.67	4079.67	2180	9135.17	5633.67	2165	35494	43539.2	3151.83	4494.83	8491.17	11722.8	12.341	12.9053	11.7707	13.8296	12.4316	11.5061	15.05	15.3482	12.4237	13.2397	13.6679	11.6825	P	P	P	P	P	M	P	P	P	M	P	P	hsa_circRNA_101213	hsa_circ_0029426	exonic	chr12	+	131357380	131357465	uc001uir.3	RAN	AAGTATGTAGCTTGTATTGGTTGGTGATGGTGGTACTGGAAAAACG
ASCRP001577	64.6667	55	63.3333	54.5	64.5	67.3333	105.667	98.3333	87.1667	93.3333	95.8333	106.167	6.09542	6.05281	6.25773	5.92029	6.1949	6.4572	5.76432	5.54988	6.2864	6.19351	5.81142	5.71191	A	A	A	P	A	P	P	A	P	P	A	A	hsa_circRNA_101214	hsa_circ_0029431	exonic	chr12	+	131475558	131490592	uc001uit.4	GPR133	CCCACACCAAGAAAGCATGCTTTATTGTCTTCAACGCTGCCAAGCC
ASCRP001578	328.5	276.333	466.333	284.667	303	306	813	570.333	297.167	350.333	386.167	489.333	8.95643	9.15439	9.31053	8.82545	8.82138	9.08631	8.43726	8.07599	8.6222	8.69628	8.62322	8.05361	P	P	P	P	P	P	P	P	P	P	P	P	hsa_circRNA_101215	hsa_circ_0029531	exonic	chr12	-	133245396	133248908	uc009zyu.1	POLE	TGACCAACCGCCTGCAGAATCCTGCCGCCTTTGACTTCCTGCTGCA
ASCRP001582	366.5	210.833	309	257.667	309	222	1555	1454.5	361.5	399.5	505.5	852	9.10822	8.71046	8.74969	8.70246	8.83702	8.64163	9.54411	9.52758	8.89062	8.9426	9.07598	8.79018	A	P	P	P	P	P	P	P	P	P	P	P	hsa_circRNA_101219	hsa_circ_0029584	exonic	chr12	-	133420612	133425310	uc001ulc.1	CHFR	ATTCCTGCTTCCGAGTTGCCAGGTGCGGTCTGCCTGCAGCCTTTCT
ASCRP001583	144.333	103.667	171.5	150.667	153.333	114.167	310.667	289	156	201.667	179.167	212.167	7.60441	7.39937	7.86111	7.70076	7.71802	7.58626	7.07239	7.04464	7.54995	7.75792	7.17499	6.8325	M	P	P	P	P	P	P	P	P	P	P	P	hsa_circRNA_101220	hsa_circ_0029589	exonic	chr12	-	133428203	133430159	uc001ulc.1	CHFR	CCTCAGCAGTCCAGCCATACGTCGTGTGCCGGCAGTGTCCTGAGTA
ASCRP001585	106	88.8333	116.167	84	86.8333	74.8333	524	242	113.667	144	156.5	168.833	7.03431	7.0563	7.25513	6.63246	6.73842	6.79196	7.78781	6.77411	6.92876	7.14624	6.94743	6.46224	P	P	P	A	P	P	P	P	P	P	P	P	hsa_circRNA_101222	hsa_circ_0029601	exonic	chr13	-	20067587	20077417	uc001umd.3	TPTE2	CGAAAGAAAGTCCACCCACAAATGAATTATCAGGAGTGAACCCAGA
ASCRP001586	77.1667	57.6667	92.5	63.5	77.8333	68	242.833	239.167	101.667	139.5	156.5	168.333	6.45263	6.15284	6.88831	6.13662	6.57555	6.57294	6.78138	6.77697	6.70216	7.07576	6.92112	6.44716	P	A	P	P	P	A	P	P	P	M	P	P	hsa_circRNA_101223	hsa_circ_0029605	exonic	chr13	+	20235837	20244503	uc001umg.3	MPHOSPH8	TTCAGCTTCCTGTTTTTCTGGATTCCAGTGGAATGACACTGGTGAT
ASCRP001588	184.333	142.833	114.667	434.333	285.5	155	1474.17	2162.67	175.667	306.833	592.833	1685.17	8.01155	8.03263	7.26673	9.52377	8.73507	8.04766	9.43836	10.2738	7.73808	8.45455	9.35415	9.61642	P	P	P	P	P	A	P	P	P	P	P	P	hsa_circRNA_101225	hsa_circ_0029633	exonic	chr13	+	20625572	20641530	uc001umw.3	ZMYM2	AATACAGGAGGCTGCAAGGTGTGACTGTTGTAAATCTCAAGGAACT
ASCRP001589	208.5	140.167	992	197	261.5	246	1058	806	451.833	423.667	521.333	483.333	8.2009	8.01987	10.4475	8.23472	8.62095	8.79909	8.84649	8.58478	9.31801	9.04905	9.11546	8.02145	P	P	P	P	P	P	P	P	P	M	M	P	hsa_circRNA_101226	hsa_circ_0029634	exonic	chr13	+	20632714	20633702	uc001umw.3	ZMYM2	ATATTCCTGTTCCTACTACAGTTCCTGTTCCTGGTTCAGCACCACC
ASCRP001590	3309.17	2715.5	3458.17	3707.33	3440.67	4291.83	3676.5	4622.33	3941	3262.17	2427.83	4816	12.0463	12.4481	12.3446	12.5579	11.8411	12.3365	11.2543	12.0244	12.8294	12.6513	11.7094	10.6808	P	P	P	P	P	P	P	P	P	P	P	P	hsa_circRNA_101227	hsa_circ_0029636	exonic	chr13	+	20632714	20641530	uc001umw.3	ZMYM2	TTTGCCTTGGAATACAGGAGGGTTCAGCACCACCCCCTTCTCCAAC
ASCRP001592	158	143.167	116.333	234.667	161.167	115.5	1783	3113.83	144.833	216.667	303.5	512	7.76568	8.04526	7.30194	8.55552	7.82165	7.57304	9.79257	11.0468	7.42646	7.88559	8.18657	8.12377	P	P	P	P	P	P	P	P	P	P	P	P	hsa_circRNA_101229	hsa_circ_0003285	exonic	chr13	-	21305979	21306260	uc001uno.1	N6AMT2	CTGTGCACAGAATCGCATGTGTGAGTGCCCCTAGTGTTTACCAGAA
ASCRP001594	88.3333	73.1667	57.8333	102.5	66.5	73	158.5	183.833	84.3333	91.3333	152.833	236.667	6.66683	6.6027	6.06603	6.96848	6.26802	6.71639	6.22203	6.40333	6.11827	6.10514	6.89407	7.02734	P	A	A	P	A	P	P	P	M	P	P	P	hsa_circRNA_101231	hsa_circ_0000467	exonic	chr13	-	21742126	21742538	uc001unt.3	SKA3	ATAATAAAAGTACACGAGCAAGAAGCCATTAACTCTGACCCAGAGT
ASCRP001596	530.5	462.167	621.833	494.667	705	414.5	1131.83	836.333	678.5	642	581.5	1494.17	9.63619	9.96915	9.6261	9.71644	9.99474	9.42606	8.97978	8.64724	9.96588	9.77562	9.3077	9.45935	P	P	P	P	P	P	P	P	P	P	P	P	hsa_circRNA_101233	hsa_circ_0008784	exonic	chr13	+	24164288	24200931	uc001uot.3	TNFRSF19	CCTTACGAACCGCACTAACTCTCCAACAATAAATACATTTGATAAG
ASCRP001598	52.5	53.3333	54.6667	50.1667	52.5	50.5	91.3333	105.667	83.3333	86.8333	102.667	108	5.60883	5.90943	5.98911	5.78248	5.79809	5.83173	5.59059	5.69094	6.1665	6.01738	6.00445	5.73534	A	A	A	A	A	A	P	P	P	P	A	A	hsa_circRNA_101235	hsa_circ_0029762	exonic	chr13	-	25049609	25052414	uc010tdc.2	PARP4	GAATCATAGACACTGTAGCCCAGTACAAGTATCAAGTACTCACACC
ASCRP001600	75.5	55.8333	46.6667	101.167	94.3333	63	88.5	126.667	74.6667	78	117.5	127.833	6.39129	5.98013	5.65274	6.96501	6.87658	6.34134	5.58176	5.90151	5.85382	5.71516	6.30822	6.03281	P	A	A	A	P	A	A	P	A	A	P	P	hsa_circRNA_101237	hsa_circ_0003489	exonic	chr13	+	26974589	26975761	uc001uqs.1	CDK8	TTATCATGACCTCAGACTATCAGCTTCAGAAGCTGCTTACCATGGA
ASCRP001606	93.8333	79.6667	95.1667	102.667	105.833	77.3333	229.5	277.333	107.5	130.667	170.667	290.5	6.75253	6.87568	6.95785	7.0108	7.09304	6.7799	6.70163	6.98747	6.81672	6.92797	7.09471	7.33596	P	P	P	M	P	P	P	P	P	P	P	P	hsa_circRNA_101243	hsa_circ_0029855	exonic	chr13	+	28834583	28835595	uc001urx.3	PAN3	GATATGCCAGGTGTTTCCAAACTATCATATTTATCCTCCAACTGCA
ASCRP001608	57.8333	44.1667	42.8333	85.1667	71	51.3333	125.5	115.833	65.6667	67.5	109.333	199.667	5.83869	5.43215	5.52366	6.68986	6.33502	5.85558	5.95479	5.78438	5.36364	5.29143	6.17567	6.72768	A	A	A	P	P	A	P	P	A	A	P	P	hsa_circRNA_101245	hsa_circ_0000471	exonic	chr13	-	33091993	33101669	uc001uuj.2	N4BP2L2	GGAGACAGAGAATTCTGCTTGGTCAGAATCGTGATGGCATTGTGTT
ASCRP001609	81	67.1667	93.3333	72.6667	82.6667	73.6667	265	250.167	112	127.667	167.333	204.833	6.49203	6.43827	6.88535	6.41048	6.66274	6.69664	6.8712	6.833	6.90443	6.89427	7.0393	6.78781	P	A	P	M	P	P	P	M	P	P	P	P	hsa_circRNA_101246	hsa_circ_0004494	exonic	chr13	+	33306237	33309467	uc010abf.3	PDS5B	GAATGATCGGAGCCTTGCTTCCTGTTTTACATCACAAATCTAAAAA
ASCRP001610	115.833	90.8333	164.333	96.3333	122	112.167	375.5	387.333	147	205.667	241.667	274.667	7.16053	7.11229	7.81008	6.88112	7.36721	7.55162	7.30352	7.49035	7.46022	7.79104	7.79394	7.25821	P	A	P	A	P	P	P	P	P	A	P	M	hsa_circRNA_101247	hsa_circ_0029961	exonic	chr13	+	33306237	33320238	uc010abf.3	PDS5B	CATTAGCTATCAACAGCCTTGCTTCCTGTTTTACATCACAAATCTA
ASCRP001611	135.167	98.1667	83.3333	116.167	103.833	101.833	1323.83	1193.33	121.167	120	246	793.5	7.43608	7.27	6.70155	7.20952	7.04328	7.34738	9.25157	9.16773	7.07475	6.7406	7.8254	8.67922	P	P	P	P	P	P	P	P	P	P	P	A	hsa_circRNA_101248	hsa_circ_0029976	exonic	chr13	+	35615069	35644989	uc021ric.1	NBEA	CAACTGTCTGCTGGTTGGTGGAGAATTTGACTTGGAGATGAACTTT
ASCRP001612	77.5	62	86.6667	68.5	74	67.1667	238.333	226.667	108.167	140	154.333	187.833	6.41151	6.33801	6.7726	6.26811	6.44203	6.50693	6.75142	6.70637	6.83179	7.07061	6.93018	6.63288	P	A	P	P	P	A	P	P	P	P	P	P	hsa_circRNA_101249	hsa_circ_0029984	exonic	chr13	+	35622699	35644989	uc021ric.1	NBEA	CAACTGTCTGGCAATTGCCTTGCCTCCTATTGCAAAGTGGCCTTAT
ASCRP001614	899.667	865.5	1102.33	1087.17	1172.33	1989.83	660.333	715.667	1222.83	950.667	612	3053.5	10.4207	10.9212	10.66	10.8822	10.5973	11.4149	8.11744	8.39704	11.0058	10.5181	9.40939	10.1734	P	P	P	P	P	P	A	P	P	A	P	P	hsa_circRNA_101251	hsa_circ_0006900	exonic	chr13	+	40293372	40301685	uc001uxh.2	COG6	CCACAGTGAAGTTGAACTCCCACCACCTGATCTTGGACCAAGTTCT
ASCRP001615	240.333	205	132	216	184	148.833	525.167	275.167	192	331.333	226.667	280.5	8.46952	8.67111	7.48696	8.40509	8.05348	7.99406	7.79544	6.97797	7.88348	8.58031	7.66764	7.29648	P	P	P	P	P	P	P	P	P	M	P	P	hsa_circRNA_101252	hsa_circ_0030042	exonic	chr13	-	41133645	41134997	uc010acc.1	FOXO1	TAGTGAGCAGAATTCAATTCGTCATAATCTGTCCCTACACAGCAAG
ASCRP001616	97	85	90.6667	103.833	86.3333	85.8333	468.667	649.167	103.333	127.833	161.5	249.167	6.82194	7.02242	6.86265	7.00098	6.74652	6.99778	7.64008	8.2668	6.70384	6.91502	7.02459	7.10855	P	P	P	P	P	P	P	M	P	P	P	P	hsa_circRNA_101253	hsa_circ_0030045	exonic	chr13	+	41367293	41373451	uc010tfb.2	SLC25A15	CAAAGCTGAGGGATATGTGGTGCCTGTCATAAGCTCCAGAGAGCTG
ASCRP001617	113.5	113.333	153.667	140.167	123.333	109.167	473.833	224.5	160.833	171.667	176.5	199.167	7.1214	7.6099	7.71358	7.60023	7.37154	7.45962	7.65775	6.67936	7.58788	7.48566	7.15056	6.72808	A	P	A	P	P	P	P	P	A	P	P	P	hsa_circRNA_101254	hsa_circ_0030051	exonic	chr13	-	41515056	41518061	uc001uxs.3	ELF1	AGAGTATTAGGAAGAAAAACTAAACCACCACGACCAGATTCCCCAG
ASCRP001618	81.8333	77	106.333	78.3333	98.1667	79.3333	226	227.167	122.333	191.667	176.333	171	6.46617	6.79075	7.12264	6.54694	6.94143	6.85616	6.67611	6.68713	7.12098	7.68708	7.14869	6.47055	P	P	P	P	P	P	P	P	P	P	P	P	hsa_circRNA_101255	hsa_circ_0030053	exonic	chr13	+	41720562	41736539	uc001uxv.1	AK056182	CCTACCTCTGGTATCCAATTGCTCCAGCACCAACTGGTGAAAAGAC
ASCRP001619	79.3333	67	97.1667	71.6667	87.3333	74.3333	196	225	123.833	160.5	177.667	195.333	6.42677	6.45505	6.97398	6.38594	6.7331	6.74172	6.49829	6.68075	7.10857	7.37155	7.18582	6.68289	P	A	P	M	P	P	P	P	P	P	P	P	hsa_circRNA_101257	hsa_circ_0030062	exonic	chr13	-	41826780	41837620	uc001uxx.3	MTRF1	TATACACCAGCAGATTATGGTACTCACAGTTCTTTCCTGATCTTCC
ASCRP001620	471.167	261.667	1418.17	339.167	467	497.667	1163.17	1147.5	742	858.167	887.667	861	9.47622	9.08423	11.1211	9.12098	9.4218	9.65352	9.02784	9.0982	10.113	10.3236	10.0439	8.79933	P	P	M	P	P	P	P	P	P	P	P	P	hsa_circRNA_101258	hsa_circ_0004711	exonic	chr13	-	42385360	42393522	uc001uyj.3	KIAA0564	GTTACTAAAGCCTGCCTTTCCAGATCCATTTTTCCTATCCATCCCT
ASCRP001624	65.6667	51.6667	55.3333	70	69.8333	63.3333	117	162.5	80.6667	75	108.667	155.333	6.07058	5.82274	5.96834	6.32915	6.33867	6.36275	5.88107	6.23739	6.08053	5.5868	6.1093	6.31275	A	A	A	P	P	A	P	P	A	A	P	P	hsa_circRNA_101262	hsa_circ_0002215	exonic	chr13	+	47297355	47308133	uc001vbj.3	LRCH1	AGTACCAGAGTGTTTCTAAGACCTCAGAGAAATTTGGAATCTATAG
ASCRP001625	218	96.6667	81.6667	164	184.167	111.333	212.333	131.667	117.5	120	168.333	533	8.2983	7.28396	6.70394	7.84579	8.04833	7.51237	6.58404	5.94837	6.98247	6.71385	7.09886	8.17438	P	P	P	P	P	P	P	P	P	P	P	P	hsa_circRNA_101263	hsa_circ_0030235	exonic	chr13	-	49075877	49077050	uc010acv.1	RCBTB2	AAAGTCCTTCTCAAGATTCGGATTATCGAGATTGCAGCCTGTCACT
ASCRP001626	115.667	76.6667	124.167	83.8333	98.1667	95	316.833	251.5	126.5	242.333	215.333	257.833	7.17099	6.79206	7.41472	6.65149	6.94881	7.20378	7.10226	6.83849	7.153	8.064	7.56113	7.14472	M	P	P	P	P	P	P	P	P	P	P	P	hsa_circRNA_101264	hsa_circ_0030292	exonic	chr13	+	51825603	51826337	uc001vff.2	FAM124A	ATCCTCCTACAGGTGAGCTTTCCGTTGAAGAGGCGCAGGACCCTTT
ASCRP001628	68.6667	58	79.6667	66.8333	74.3333	63.1667	1643.83	134	275.667	335.167	357.5	372.5	6.1865	6.12679	6.66901	6.23	6.43441	6.36244	9.28891	5.97452	8.51924	8.6194	8.48672	7.6746	P	A	P	A	P	A	A	P	P	P	P	P	hsa_circRNA_101267	hsa_circ_0030342	exonic	chr13	-	52992126	53001354	uc001vgq.3	VPS36	AATTACCTCTCAGGCCTTTGAAGACCTCAGCAAACTAATGATCAAG
ASCRP001630	65.6667	49.6667	47.5	76.5	64.5	52	89.5	115	71	75.6667	107.667	167.833	6.07387	5.69516	5.73199	6.50915	6.11064	5.85106	5.60693	5.80009	5.62981	5.59174	6.13035	6.45588	A	A	A	P	P	A	P	P	A	A	P	P	hsa_circRNA_101269	hsa_circ_0004245	exonic	chr13	+	61013821	61034674	uc001vib.4	TDRD3	TGTCAAAAATAAGGTATCTTTCAGATGAAGGCATTGAAGCTTGCAC
ASCRP001631	78.5	56.8333	49.6667	120.333	96.6667	59.3333	114.667	138.833	72.6667	75.6667	130.167	212.5	6.4528	6.08863	5.74174	7.30606	6.92376	6.16513	5.86161	6.03027	5.66222	5.62411	6.55139	6.84075	P	A	A	P	P	A	P	P	A	A	P	A	hsa_circRNA_101270	hsa_circ_0003441	exonic	chr13	+	61013821	61041513	uc001vib.4	TDRD3	GGAGTTACAGAGAGTATCTTTCAGATGAAGGCATTGAAGCTTGCAC
ASCRP001632	65.6667	58.5	69	53.3333	60.5	59	192.833	155	113	120.833	129.333	158.5	6.06986	6.15789	6.41898	5.85866	6.06524	6.20288	6.46827	6.1968	6.92896	6.72494	6.54281	6.34762	A	A	P	A	A	A	P	P	P	P	P	P	hsa_circRNA_101271	hsa_circ_0030388	exonic	chr13	-	64564228	64608670	uc001vii.1	AK057471	TTCCGGAAAAGCCTCCATTTGCTGTTTGGGAAACTCTCTACGCTAT
ASCRP001633	110.333	101.333	215	106.167	136.5	109	207	202.167	155.667	156	165.5	255	7.06972	7.35279	8.21074	7.05662	7.52899	7.44182	6.56461	6.52498	7.52599	7.27982	7.04536	7.12287	P	P	P	P	M	P	P	P	P	P	P	P	hsa_circRNA_101272	hsa_circ_0005783	exonic	chr13	-	74419963	74420510	uc001vjg.3	KLF12	CATGGCAAAGTCTCCAAACGTCCACAACTATCCCGATATGGAAGCC
ASCRP001636	9009.17	6521.67	6519.5	5236.5	10361.8	9230.33	13891.2	8661	4753	4838.67	6423.33	37814.7	13.3479	13.4744	13.1479	12.9897	13.2938	13.4216	13.7472	13.1144	13.1577	13.3846	13.2081	13.3549	P	A	P	P	P	P	P	P	P	P	P	P	hsa_circRNA_101275	hsa_circ_0030428	exonic	chr13	-	75915260	75915723	uc001vjl.1	TBC1D4	AGGCCCTTCTGTCTCTACCCACCAAGAGCCAAGCTGGTGATACAGA
ASCRP001639	212	218.667	120.667	323.167	206.833	125.833	1591.33	3105	171.667	208.333	316.5	780	8.23086	8.76069	7.35066	9.03913	8.23141	7.71487	9.57417	11.0448	7.69894	7.82391	8.27518	8.65063	P	P	P	P	P	P	P	P	P	P	P	P	hsa_circRNA_101278	hsa_circ_0004217	exonic	chr13	-	77791974	77818086	uc010aev.3	MYCBP2	TTGGAAGTTTTTCTGATCTGTGGTTGTGGTTCCGGAGAATCTGGTT
ASCRP001640	846.667	541.5	1007.33	794.167	1138.33	1183.67	3865.83	1255.67	1055.17	1327	1582.67	3255.5	10.3639	10.2336	10.4841	10.5465	10.567	10.7722	11.1992	9.26133	10.7297	11.1596	11.1025	10.2351	P	P	P	P	P	P	A	P	M	P	P	P	hsa_circRNA_101279	hsa_circ_0030514	exonic	chr13	-	77798585	77807398	uc010aev.3	MYCBP2	TGTCAACTCCAGGCCCCCTTGTATTTGCTGGTCCTATTTTTATGAA
ASCRP001641	64	48.8333	42	86.3333	70.1667	50.5	91.3333	114.333	71.8333	81.6667	107.333	104.667	6.01303	5.6377	5.48478	6.71451	6.33129	5.80603	5.60865	5.77917	5.70667	5.83561	6.12105	5.74011	A	A	A	P	P	A	A	P	A	A	P	A	hsa_circRNA_101280	hsa_circ_0000497	exonic	chr13	+	78293666	78327493	uc001vkk.2	SLAIN1	CAATCTTGTAGTTATACATTGGCTCTTCAAAGACGTTCACCTCATC
ASCRP001643	216.667	306.333	144.5	599.333	318.5	195.333	3095.17	5421.17	207.167	280.333	483.333	873.667	8.27876	9.35379	7.62515	10.0551	8.87059	8.43829	10.7696	12.3758	8.05191	8.30265	9.01096	8.81959	P	P	P	P	A	P	P	P	P	P	P	P	hsa_circRNA_101282	hsa_circ_0030569	exonic	chr13	-	95686858	95735544	uc001vmd.4	ABCC4	AAACAGCAAAACAGACATTGCTACAAGTGGTTGGTGTGGTCTCTGT
ASCRP001644	107.333	105.333	114.667	106.5	105	111.333	253.333	184	115	128.5	134	161	7.02355	7.45864	7.28516	7.08744	7.08014	7.47448	6.82848	6.41318	6.96288	6.85827	6.62749	6.35888	P	P	P	P	P	P	P	P	M	M	P	P	hsa_circRNA_101283	hsa_circ_0030586	exonic	chr13	-	95813442	95840796	uc001vmd.4	ABCC4	ATAGAAATCCAATAGGCATCAGAGACCCCAACTCTACAAGGCCTTT
ASCRP001645	65	55.6667	65	56.3333	64.6667	52.8333	111.5	123.333	85.3333	100.333	106.167	126.833	6.03678	6.03919	6.27303	5.94703	6.17538	5.88674	5.81344	5.86351	6.21478	6.3598	6.10434	6.01845	A	A	A	P	A	A	P	P	P	P	A	P	hsa_circRNA_101285	hsa_circ_0006318	exonic	chr13	-	95858785	95863035	uc010afl.1	ABCC4	AAGAATCCAGGCACTTCGTCTTAGTAACATGGCCATGGGGAAGACA
ASCRP001646	91.3333	87.3333	56.1667	122	82.5	58.5	674.833	978.333	89	87.6667	115.833	204.5	6.71747	7.05678	6.05014	7.31217	6.66247	6.20119	8.15248	8.87327	6.29465	6.08317	6.32629	6.80022	P	P	A	P	P	A	P	P	P	P	P	P	hsa_circRNA_101286	hsa_circ_0002473	exonic	chr13	+	96375495	96377506	uc001vmp.3	DNAJC3	CTTGATGAAGCAGAAGATGATTTTAAAAAAGTGATGGTGACCCTGA
ASCRP001647	12600	6792.33	8399	6703.33	22801.7	16227.2	3071.5	3326.17	3593.17	1120.83	5884	111923	13.8593	13.5227	13.4956	13.3963	14.3408	14.0234	10.7705	11.2323	12.6938	10.8305	13.014	15.227	M	P	P	A	P	P	P	P	P	P	P	M	hsa_circRNA_101287	hsa_circ_0008274	exonic	chr13	-	96485180	96489456	uc001vms.3	UGGT2	CAAGATACAAGATCTCCCCAATAATATGATTTACCAAGTCGCCATT
ASCRP001648	65.8333	58.1667	58.1667	55.6667	57.3333	59.1667	123.167	133	77.6667	100.667	96.6667	237.833	6.13422	6.13706	6.08151	5.92523	5.96094	6.20036	5.95434	5.97483	5.96833	6.3179	5.85671	7.01962	A	A	A	P	A	A	P	P	A	M	A	P	hsa_circRNA_101288	hsa_circ_0002557	exonic	chr13	+	98865473	98865667	uc001vnh.3	FARP1	TGAAGTTCCAATATTCTCTAAGCCGCTTTCATCATGGGAGAAATAG
ASCRP001650	231.333	124.667	267.833	222.167	202.667	193	1546.33	1132.33	221.333	376.667	429.167	639.833	8.3976	7.78171	8.55924	8.47006	8.20229	8.41708	9.53292	9.07234	8.1329	8.85427	8.77507	8.39354	P	P	P	P	P	P	P	P	M	P	P	P	hsa_circRNA_101290	hsa_circ_0030724	exonic	chr13	+	99966350	99970323	uc001vob.4	UBAC2	AAGTGGACTTCCTGGCACCTGTGTTTGCTCTGTTTGTACCATTTTA
ASCRP001651	62.1667	56	87.3333	58.5	70.6667	63.5	169	181	97.5	126.833	142.833	146.833	5.99111	6.03286	6.80226	6.02419	6.31941	6.38344	6.29551	6.38561	6.56063	6.86712	6.73299	6.24409	A	A	P	P	P	A	P	P	P	P	P	P	hsa_circRNA_101291	hsa_circ_0030741	exonic	chr13	+	100206557	100207901	uc001voj.1	TM9SF2	ATACTTCTTTGCTATTTCCACCTATGTGCAGAGGCCATTGAACACC
ASCRP001652	61	43.8333	45.3333	56.8333	65.6667	45.8333	103.667	114.167	73.3333	77.8333	103	143.667	5.79153	5.42338	5.59741	5.98665	6.13521	5.52964	5.7284	5.77312	5.70059	5.70115	5.99004	6.18851	A	A	A	P	P	A	P	P	A	A	P	P	hsa_circRNA_101292	hsa_circ_0002664	exonic	chr13	+	100953713	100962162	uc001voo.3	PCCA	AACTATGTTATTCGAGGTTGAGCATCCTGTCACAGAATGCATTACT
ASCRP001654	70.1667	54.3333	47.6667	70	89	49	94	144.667	71.1667	72	109.667	150.833	6.19516	5.94634	5.65365	6.33375	6.77343	5.70571	5.65962	6.07626	5.54515	5.49123	6.16154	6.28688	A	A	A	P	P	A	A	P	A	A	M	P	hsa_circRNA_101294	hsa_circ_0008420	exonic	chr13	+	100982814	100992513	uc001voo.3	PCCA	GAAAATTCAAGGTGTTACACATAATATTGCATTACTTCGAGAGGTG
ASCRP001655	87.5	113.667	69.8333	125.333	83.5	70.3333	538.5	1182.17	89.3333	98.3333	132.5	308.833	6.61452	7.59308	6.33649	7.34286	6.6451	6.63959	7.82844	9.14829	6.32936	6.35027	6.60353	7.42327	P	P	A	A	P	P	P	P	P	P	P	P	hsa_circRNA_101295	hsa_circ_0030777	exonic	chr13	+	101077886	101101559	uc001voo.3	PCCA	TTCTTGGTACAGTGGTGGAAGTTGATGGGTCGAAACTAAATGTGAC
ASCRP001656	594.833	368.667	541.333	401	648.833	685.333	762	531	417	469.833	533.167	1121.67	9.77748	9.64065	9.46955	9.41831	9.8853	10.0619	8.33727	7.99217	9.15869	9.2042	9.1585	9.11262	P	P	P	P	P	P	P	P	P	P	P	P	hsa_circRNA_101296	hsa_circ_0030793	exonic	chr13	-	102521074	102527646	uc001vpe.2	FGF14	CTACCCATCAATCCCCAGCTCAAGGGTATAGTGACCAGGTTATATT
ASCRP001661	62	57.1667	60.3333	52.5	56.3333	54.3333	117.667	117.667	81.1667	85.3333	94.6667	120.833	5.97198	6.08983	6.13763	5.7968	5.91516	6.03651	5.88848	5.77229	5.98213	5.89628	5.8	5.94123	A	A	A	A	A	A	P	M	A	M	A	P	hsa_circRNA_101301	hsa_circ_0030958	exonic	chr13	+	113460526	113465040	uc001vsi.4	ATP11A	AAAGCTGCGATTGATTATTGATACACCCACAAGTCCAGTGACAAGC
ASCRP001662	126.667	83.1667	109.5	114.833	107.667	103.5	226.167	196.333	105.667	120.333	198.167	900.667	7.34613	6.93319	7.21674	7.19878	7.11495	7.36134	6.65977	6.49698	6.74323	6.7805	7.38484	8.8584	P	P	P	P	P	P	P	P	P	P	P	P	hsa_circRNA_101303	hsa_circ_0030998	exonic	chr13	+	113963957	113964177	uc001vtm.1	LAMP1	AGCTCCAAAGAACATGACCTTTGACCTGCCATCAGATGCCACAGTG
ASCRP001664	93.6667	87.5	80.6667	113.333	92.6667	72.8333	906.833	1492.67	96.8333	124.667	184.833	341.5	6.7345	7.05412	6.70603	7.16447	6.84611	6.70483	8.60357	9.58146	6.54291	6.85621	7.27303	7.54616	P	A	P	P	P	P	P	P	P	P	P	P	hsa_circRNA_101305	hsa_circ_0002807	exonic	chr13	+	114149816	114164739	uc001vtt.4	TMCO3	CTCGGGGTGACAAAGAAGCTGAAAATGTGTGTCTGACATGCAAGCT
ASCRP001665	172.5	172.167	133.833	176	185	119.667	1081.33	1722.17	178.667	214.333	278.167	662.833	7.91344	8.41001	7.51279	7.98678	8.05264	7.65659	8.8901	9.85044	7.77347	7.86792	8.05287	8.436	P	P	P	P	P	P	P	P	P	P	P	P	hsa_circRNA_101306	hsa_circ_0031017	exonic	chr13	+	114149816	114175048	uc001vtt.4	TMCO3	CGCCAGTGCATCTTCTAGCTGAAAATGTGTGTCTGACATGCAAGCT
ASCRP001666	124	122.5	103.333	100.167	118.833	91.8333	337.167	285	144	147.5	154	378.5	7.30236	7.73631	7.0592	6.94772	7.28719	7.1447	7.17199	7.02333	7.41493	7.20755	6.88668	7.70247	P	P	P	P	P	P	P	P	P	P	A	P	hsa_circRNA_101307	hsa_circ_0008539	exonic	chr13	+	114164552	114175048	uc001vtt.4	TMCO3	GCGCCAGTGCATCTTCTAGGTGTGGAAGATTTCCTTACAAGGGCCG
ASCRP001667	508	82	88.8333	165.5	85.5	112.667	6467.83	4936.67	468	408.5	412.333	411	9.57853	6.93478	6.82293	7.88484	6.67568	7.50514	12.4663	12.1745	9.36335	8.99164	8.71501	7.80645	P	P	P	P	P	P	P	P	P	P	P	P	hsa_circRNA_101308	hsa_circ_0031027	exonic	chr13	+	114164552	114193822	uc001vtu.4	TMCO3	GTTTTCTTCGCCTCCATAGGTGTGGAAGATTTCCTTACAAGGGCCG
ASCRP001668	94.1667	68.5	91.1667	72.6667	85.3333	80.6667	3084.67	200	553.5	562.833	711.167	1128.17	6.76245	6.53682	6.83316	6.36209	6.72438	6.87162	10.8135	6.51582	9.61811	9.49673	9.60492	9.12162	P	P	P	P	A	P	P	P	P	P	P	P	hsa_circRNA_101309	hsa_circ_0007404	exonic	chr13	+	114188359	114193822	uc001vtu.4	TMCO3	GCCTCCATAGCATTGTCGTGGAAGTTCTCCGAATCCTGGTTTTGAT
ASCRP001670	285	165.667	315.5	215	231	237.833	459	387	238.833	366	325.333	286.167	8.7564	8.31846	8.78619	8.41734	8.43472	8.73972	7.60973	7.48723	8.28927	8.78831	8.32468	7.32495	P	P	P	P	A	P	P	P	P	P	P	P	hsa_circRNA_101311	hsa_circ_0004096	exonic	chr13	-	114806475	114839312	uc001vuj.3	RASA3	TGACTCGGAAGTGCAGGTGAAGCCAAAAACCTTCCCTCTTACCCGG
ASCRP001671	71.3333	60	64.6667	74.1667	60.8333	61.8333	124.333	130.333	83.6667	88.3333	110.167	135.833	6.21315	6.21878	6.29753	6.4182	6.06672	6.2946	5.94895	5.92552	6.15698	6.05145	6.16566	6.13616	A	A	A	P	A	A	P	P	A	P	P	A	hsa_circRNA_101312	hsa_circ_0031113	exonic	chr14	-	20863608	20864108	uc001vxe.3	TEP1	ACAAGGCCAGAAGTCGGTGATCCACAGTCGGCAGTTTCCATTCAGA
ASCRP001672	5362	3451.33	4998.33	4419.67	7296.33	7044.17	5647	6883.67	4440.33	3700.67	5028.67	33679.3	12.6742	12.7905	12.8062	12.7815	12.8294	12.899	12.1726	12.7307	12.9975	12.8387	12.7691	13.2065	P	P	P	P	P	P	P	P	P	M	P	M	hsa_circRNA_101313	hsa_circ_0031132	exonic	chr14	+	21464367	21464870	uc001vym.3	METTL17	GGCACGGCAGTGTCCCCATGAACTCCCTTGTCCCCAGTTGACCAAC
ASCRP001673	69.6667	51.5	47.3333	71.5	65.8333	58	146.5	191.167	75.5	78.8333	137	164.667	6.20641	5.88052	5.7171	6.34581	6.21209	6.15597	6.12503	6.4568	5.82117	5.80057	6.65573	6.40468	P	A	A	P	A	A	P	P	A	A	P	P	hsa_circRNA_101314	hsa_circ_0003643	exonic	chr14	-	21698477	21702388	uc001vzw.3	HNRNPC	ATTATGATAGTTTTCGGCTTTGTGAGAAACCTTACCATCAAACACG
ASCRP001674	146.5	74.5	120	87.3333	100.167	74	239	337.5	169.167	192.167	221.333	172.167	7.61051	6.69028	7.3333	6.70221	6.97427	6.74608	6.73464	7.27978	7.66252	7.67006	7.59618	6.46799	P	A	P	P	P	P	P	P	P	M	P	M	hsa_circRNA_101315	hsa_circ_0005957	exonic	chr14	-	21968636	21970045	uc001wbb.3	METTL3	TCACAGGCAGGTCAGTCAGGAGATCCTAGAGCTATTAAATACTACA
ASCRP001675	87	63.6667	55.8333	101.833	75.1667	55.6667	332.667	132	92.5	109.167	135.833	168.333	6.62501	6.32255	6.00698	6.95854	6.46023	6.06872	7.15845	5.93627	6.46266	6.54214	6.65835	6.44734	P	A	A	P	P	A	P	A	P	P	P	M	hsa_circRNA_101316	hsa_circ_0000523	exonic	chr14	-	21971315	21972024	uc001wbc.3	METTL3	AACAGTCCACTAAGGAACAACAGAGCAAGAAGATCTACGGAATCCA
ASCRP001676	99.6667	66.1667	48.8333	169.167	110.167	70	123.833	121.167	78.3333	81.5	113.333	116	6.84179	6.46406	5.70023	7.91566	7.1638	6.57042	5.9431	5.8491	5.97306	5.80232	6.19533	5.8764	P	A	A	P	A	P	A	P	A	P	M	P	hsa_circRNA_101317	hsa_circ_0004137	exonic	chr14	-	23375403	23378804	uc001whg.3	RBM23	CACTTGCCACTGGGATGAGCAACAAAGGAAAGAAGTTAAAAAGGAT
ASCRP001677	150.5	78.3333	67.8333	246.333	159.333	96.3333	252.5	258.833	92.6667	101.833	226.333	284.833	7.69482	6.82223	6.40118	8.62644	7.79271	7.24016	6.82594	6.88781	6.46304	6.44576	7.64754	7.30788	P	P	A	P	P	P	P	P	P	P	P	P	hsa_circRNA_101318	hsa_circ_0031241	exonic	chr14	-	23375403	23380612	uc001whg.3	RBM23	TCCACTTGCCACTGGATCTGACAGGATGGCATCTGATGACTTTGAC
ASCRP001678	224	102	77.8333	337.5	205.667	130	313.667	330.5	100	106.5	279.167	383.667	8.33747	7.35725	6.62649	9.10923	8.23219	7.7836	7.09221	7.24063	6.65412	6.49519	8.05545	7.71831	P	P	P	P	P	P	P	P	P	P	P	P	hsa_circRNA_101319	hsa_circ_0000524	exonic	chr14	-	23378691	23380612	uc001whg.3	RBM23	CGGGGAGACAAGCAAATCTGACAGGATGGCATCTGATGACTTTGAC
ASCRP001679	298.333	186.667	302.333	213.5	308.667	258.5	4637.17	443.167	927	921.5	1187.33	2064.5	8.81923	8.53678	8.72001	8.4039	8.85087	8.87482	11.8119	7.69773	10.5495	10.445	10.598	9.80205	P	P	P	P	P	P	P	P	P	A	P	P	hsa_circRNA_101320	hsa_circ_0031250	exonic	chr14	-	23395341	23396023	uc001whl.1	PRMT5	ATCTTCCGGCTCCTCAAGTTCTGGATGCGGGTACCCTTGGTGGCAC
ASCRP001681	181.333	123.167	279.333	163.167	192.833	189.167	499.167	394.167	218.167	326	328	295	7.97891	7.73753	8.60063	7.84706	8.12334	8.38614	7.72042	7.51532	8.14181	8.57139	8.33506	7.36288	P	P	P	A	A	P	P	P	P	P	P	P	hsa_circRNA_101322	hsa_circ_0031258	exonic	chr14	-	23416379	23421892	uc001who.3	HAUS4	GTCTGATTAGTGTGCAGCAAACAACTTCCTCCTTGTAACCTGAGTA
ASCRP001682	153	131.833	134.167	135.667	144.5	123	468.667	309.667	168.833	171	178.667	302.5	7.70446	7.9132	7.50822	7.51437	7.6244	7.70262	7.63846	7.15433	7.67103	7.47802	7.20785	7.38714	P	P	P	M	P	P	P	P	P	P	P	P	hsa_circRNA_101323	hsa_circ_0008758	exonic	chr14	-	23502576	23502883	uc001wii.3	PSMB5	TAAGAGAGGCCCTGTTCCGCCATGGAGTCATAGTTGCAGCTGACTC
ASCRP001684	84.6667	71	78	83.6667	72.3333	65.5	159.167	154.333	93.3333	110.667	125.5	168.333	6.55798	6.56971	6.60088	6.63651	6.37025	6.50016	6.22946	6.17854	6.45368	6.59698	6.49504	6.47153	P	A	P	P	P	P	P	P	P	P	P	P	hsa_circRNA_101325	hsa_circ_0031288	exonic	chr14	+	23793346	23793498	uc001wjk.3	PABPN1	GCGTCTACAGGTGATCCCAAAACGAACCAACAGACCAGGCATCAGC
ASCRP001687	164	101	203.333	138.5	149.833	131.667	551.167	498.5	193.5	282.667	286.333	282.167	7.83487	7.32039	8.13518	7.54456	7.70064	7.80864	7.86728	7.89042	7.91988	8.31266	8.10202	7.287	P	P	P	P	P	A	P	P	A	P	P	P	hsa_circRNA_101328	hsa_circ_0007750	exonic	chr14	-	24735635	24737825	uc001wof.3	RABGGTA	AGGAGCTGCTACTGTGCAACAACCCTCTGTGACCTGCCTGCTGCCT
ASCRP001688	70.8333	55.6667	60.3333	56.8333	61	59	177.167	173.333	86.3333	95.3333	108.333	130.333	6.19659	5.96666	6.15427	5.97258	6.04691	6.27396	6.3668	6.34209	6.2217	6.2341	6.14652	6.05672	A	A	A	A	A	A	P	P	P	P	P	P	hsa_circRNA_101329	hsa_circ_0031408	exonic	chr14	-	25443870	25444056	uc001wpu.3	STXBP6	TTAACTTATATCTGCCTGTCAGATTCACTGCGTGCTGTCCTCACTT
ASCRP001690	68.5	53.5	56.8333	74.5	64	56.5	140.333	158	80.8333	85.3333	114	201.333	6.16025	5.94819	6.05612	6.43742	6.15984	6.14327	6.06662	6.22185	6.0614	5.97056	6.24262	6.75332	A	A	A	P	P	A	P	P	A	P	P	P	hsa_circRNA_101331	hsa_circ_0009140	exonic	chr14	+	31139461	31144271	uc001wqm.1	SCFD1	GCCACTGCTGTTTTAGAACATATAAAGGATTTCCATTTAAACAGGG
ASCRP001691	677.333	538.667	658.667	547.167	977.333	828	982	1072	531	589.833	785.167	6533.17	9.97648	10.2291	9.70549	9.8901	10.3961	10.2775	8.72298	8.99713	9.54946	9.57366	9.76131	10.9722	P	P	P	P	P	P	M	P	P	P	P	A	hsa_circRNA_101332	hsa_circ_0031431	exonic	chr14	+	31346777	31349940	uc001wqp.2	COCH	TTCAAGCCAGCTCCCATTGCTATCACATGTTTTACCAGAGGCTTGG
ASCRP001693	91.6667	68.1667	104.167	87.5	98.1667	81.1667	215	203	112.667	162	158.833	166.333	6.72122	6.57732	7.06838	6.68843	6.96517	6.92109	6.61403	6.55005	6.92652	7.39716	6.96179	6.42142	P	A	P	P	P	P	P	P	P	P	P	P	hsa_circRNA_101334	hsa_circ_0002301	exonic	chr14	-	31596990	31602881	uc001wrc.1	HECTD1	ATTCCTTATATGGTCAACTGCAACTTGGCCTCTTGATCCACCAAAG
ASCRP001695	359.333	191.333	440.167	317	323.833	293	1878.83	1928.67	351.333	551.333	716.167	1133.33	9.07787	8.5636	9.23226	8.9908	8.89806	9.03545	9.89149	10.036	8.86064	9.46103	9.61469	9.13412	A	P	P	P	P	P	P	P	P	P	P	P	hsa_circRNA_101336	hsa_circ_0031554	exonic	chr14	-	31813101	31844174	uc001wrf.4	HEATR5A	CTGGTTAGCTGCCTCTGTGTCCTGCAGTTGTTAGCCATCACCTTGC
ASCRP001697	99.3333	82.3333	81.5	78.8333	97.3333	73	133.333	453.333	105	108.5	125.333	643.833	6.87256	6.8905	6.70324	6.54924	6.93189	6.70121	6.02506	7.28716	6.74373	6.55627	6.47455	8.39567	P	M	P	P	P	P	P	A	P	A	P	A	hsa_circRNA_101338	hsa_circ_0031570	exonic	chr14	-	31849672	31852977	uc001wrf.4	HEATR5A	ATGACATTAGGTCTCCTTGACAGTATCTTGTCAGTTATTCTTCATC
ASCRP001705	90.6667	74.3333	102.333	79.8333	96.6667	76.5	166.667	302.833	133.333	150.167	153.5	320.333	6.69326	6.71113	7.06292	6.56304	6.894	6.76213	6.22955	7.11445	7.24984	7.22984	6.86417	7.46084	P	P	A	M	P	P	P	P	P	P	P	M	hsa_circRNA_101346	hsa_circ_0031724	exonic	chr14	-	39543618	39545297	uc010tqc.1	SEC23A	AACCTTACTGGTGTACTTTTCCCAACACTGGTGCTCGTATCATGAT
ASCRP001712	252.667	156.667	264.333	205.833	224	182.333	1053.67	1229.33	235.5	398.667	471.167	688.667	8.5541	8.24102	8.53342	8.33127	8.37253	8.31951	8.84399	9.22469	8.27446	8.9506	8.96027	8.47947	P	P	P	P	P	P	P	P	P	P	P	P	hsa_circRNA_101353	hsa_circ_0031897	exonic	chr14	+	51710573	51713938	uc001wza.4	TMX1	ATGGTTTGGTCCAGGTTCTGTTCTTTATGCCCCGTGGTGCCCTGCT
ASCRP001713	428.667	278.5	513	363.167	527.667	514.833	1020	934.333	397.5	523.167	564.667	983.333	9.36438	9.18345	9.40467	9.25477	9.59524	9.71537	8.78905	8.81365	9.05959	9.38747	9.26105	8.96402	P	P	P	P	P	P	P	P	A	P	P	M	hsa_circRNA_101354	hsa_circ_0009104	exonic	chr14	+	51710573	51716483	uc001wza.4	TMX1	TACCCTTCAATTATGCCCCGTGGTGCCCTGCTTGTCAAAATCTTCA
ASCRP001714	71	65.8333	69	58	71.8333	52	109	118	79.6667	94.5	94.3333	116.167	6.17405	6.39413	6.347	6.02593	6.38774	5.82273	5.7993	5.83198	6.02096	6.22742	5.82736	5.89395	A	A	A	A	P	A	P	P	P	P	A	P	hsa_circRNA_101355	hsa_circ_0031933	exonic	chr14	-	52520296	52527074	uc001wzp.3	NID2	AACACCGAGGCTGAACACTTTCCAGGCAGTTTTGGCATCTGATGGG
ASCRP001724	94	69.3333	92.8333	82.6667	91	67.6667	267.167	235.5	108.667	134	148.833	241.667	6.77045	6.51125	6.895	6.62274	6.80343	6.60267	6.88254	6.75274	6.84007	6.9958	6.83051	7.0522	P	A	P	P	P	P	P	P	P	P	P	P	hsa_circRNA_101365	hsa_circ_0032202	exonic	chr14	+	64908771	64916340	uc001xhb.3	MTHFD1	TATGACCTCAAGGGCACTCCAGTGTTTGTCCATGCTGGCCCGTTTG
ASCRP001726	268.5	128.667	173.167	243.333	300	208.833	4889.17	506.833	403.167	462	741.833	4034.5	8.65719	7.84286	7.8735	8.607	8.8068	8.54217	11.4226	7.91397	9.09214	9.18568	9.68001	10.4725	P	P	P	P	P	P	A	P	P	P	P	P	hsa_circRNA_101367	hsa_circ_0001998	exonic	chr14	+	65922338	66028484	uc001xin.3	FUT8	AATCTCTCCGGTTGCTGCTTTTGCTCAGAGGACATCCATGACCCTA
ASCRP001727	128	98.6667	107	106.167	203.167	215	152	150.167	100.5	95.3333	128.833	914.167	7.35953	7.30005	7.1238	7.06438	8.2065	8.55299	6.16911	6.13631	6.64837	6.31775	6.53014	8.69478	P	P	P	P	P	P	P	P	P	P	P	A	hsa_circRNA_101368	hsa_circ_0003028	exonic	chr14	+	66028054	66028484	uc001xin.3	FUT8	AATCTCTCCGCATGTAGAGCGCATGAAGTACAGGACAATAAAGCTT
ASCRP001728	187.333	154	676	164	214.167	167	2108.5	623	656.667	684	802.833	900.333	8.03438	8.21416	9.73863	7.85174	8.29595	8.18188	10.1362	8.20632	9.90888	9.89248	9.81547	8.84449	P	P	P	P	P	P	P	P	P	P	P	P	hsa_circRNA_101369	hsa_circ_0032253	exonic	chr14	+	67431907	67490392	uc001xiw.3	GPHN	AACATTCTCAGAGCCAATTCCAGACTCCATCATTTCTCGTGGTGTT
ASCRP001729	137.333	116.667	234.167	99.6667	129.5	110.667	620	380.333	188	199.5	214.667	223.833	7.47944	7.65525	8.34964	6.93156	7.45557	7.46827	8.02814	7.46664	7.88279	7.74603	7.53751	6.90476	P	P	P	P	P	M	P	P	P	P	P	M	hsa_circRNA_101370	hsa_circ_0032254	exonic	chr14	+	67431907	67525503	uc001xix.3	GPHN	TCATCAATTACCGAGATTCCAGACTCCATCATTTCTCGTGGTGTTC
ASCRP001731	228.333	165.333	354.333	189.167	238.333	210.333	595.667	553.333	296.833	433	390.167	404.833	8.37052	8.3143	8.96867	8.114	8.47592	8.54284	7.96958	8.04437	8.63438	9.07994	8.64778	7.78895	P	P	P	P	P	P	P	P	P	P	P	P	hsa_circRNA_101372	hsa_circ_0006278	exonic	chr14	-	68151731	68157138	uc001xjv.4	RDH11	ATTCTAAGTGGGAATCATTTCAGGTCACTTCCTCCTAACCCATCTG
ASCRP001732	235	311	176.833	603	333.167	179.333	3812.33	7096.67	223.333	355	607.667	747.667	8.42788	9.38112	7.91059	10.0587	8.94463	8.30002	11.3403	12.7814	8.17488	8.7261	9.38878	8.59901	P	P	P	P	P	P	P	P	P	P	M	P	hsa_circRNA_101373	hsa_circ_0005139	exonic	chr14	-	68156928	68159769	uc001xjv.4	RDH11	AGACTAAAAGGAAAATGCTGTCCAGTGGGGTGTGTACATCAACTGT
ASCRP001737	319.333	254.5	384.167	310	403.5	435.167	723.5	746.333	507.667	552.333	494.667	691.833	8.92449	9.02709	9.08932	8.96876	9.19182	9.47068	8.25405	8.45285	9.48159	9.47151	9.05082	8.48784	P	P	P	P	P	A	P	A	P	P	P	P	hsa_circRNA_101378	hsa_circ_0032353	exonic	chr14	+	70170111	70171459	uc010aqz.3	KIAA0247	TCTTTCCATCATAGCAGTGTGCCCCCTACCACCGGAGCCAGAGAAT
ASCRP001740	1371.67	942.5	2585.17	1106.17	1636.67	1390.5	3317.33	2402.33	1711.33	2203	2189.33	2194	10.9315	11.07	11.9748	10.9052	11.0227	11.0287	10.9906	10.5229	11.5754	12.0139	11.4348	9.86257	P	P	P	P	P	P	P	P	P	P	P	A	hsa_circRNA_101381	hsa_circ_0004781	exonic	chr14	+	71413631	71435827	uc001xmn.4	PCNX	GAAGAACAAGGCCCTTCCTTCTACCATGATTATAGTAGCAGTTTAT
ASCRP001741	88.8333	71	70.3333	65.6667	71.3333	63.5	254.667	316.667	441.333	97	105.833	138	6.66335	6.60627	6.47065	6.2447	6.33565	6.37415	6.837	7.18143	9.27572	6.31022	6.03574	6.14798	P	A	A	P	P	A	P	P	P	P	A	P	hsa_circRNA_101382	hsa_circ_0008682	exonic	chr14	+	71428942	71445365	uc001xmn.4	PCNX	AAGATGCAGTCAGTGGAGTGATCCTGGTGGAGGGATTGAAATGTCT
ASCRP001743	75.3333	58.8333	71.8333	65.8333	68	60	230.833	248	81.8333	94.6667	118.667	172.667	6.33331	6.1267	6.49133	6.24177	6.27251	6.27644	6.68929	6.83719	6.10098	6.24734	6.34	6.49415	P	A	A	P	P	A	P	P	A	P	P	P	hsa_circRNA_101384	hsa_circ_0032391	exonic	chr14	+	71428942	71479919	uc001xmo.2	PCNX	TTTGGCCCTGTTTGATAGTGATCCTGGTGGAGGGATTGAAATGTCT
ASCRP001751	269	263.333	354.667	310	295.833	201.167	1067.83	352.833	378	280.333	317.667	488.5	8.64883	9.08778	8.95851	8.95852	8.79296	8.47135	8.86786	7.3471	8.97492	8.29857	8.27091	8.0419	P	P	P	P	P	P	P	A	P	P	P	P	hsa_circRNA_101392	hsa_circ_0008521	exonic	chr14	+	73614502	73614802	uc001xnv.3	PSEN1	AACCACCTGAGCAATACTACCTAATCTGGGAGCCTGCAAGTGACAA
ASCRP001752	53.5	54.8333	55	57	59.3333	50.8333	139.333	131.667	75.5	84.5	101.5	106.5	5.63014	5.90271	5.90004	6.04013	5.97415	5.96954	6.06673	5.96407	5.72417	5.91069	6.01238	5.7832	A	A	A	P	A	A	P	P	A	A	P	P	hsa_circRNA_101393	hsa_circ_0003848	exonic	chr14	+	73614502	73614814	uc001xnq.4	PSEN1	ACGTAGCCAGACCTAATCTGGGAGCCTGCAAGTGACAACAGCCTTT
ASCRP001755	521.667	388.667	526.333	408.667	481.833	426	834.333	773.667	465	702.333	618.167	764.833	9.60878	9.72549	9.4259	9.43802	9.47906	9.45055	8.48163	8.51933	9.34831	9.93808	9.42428	8.62159	A	P	P	P	P	P	P	P	A	P	P	P	hsa_circRNA_101396	hsa_circ_0002289	exonic	chr14	+	73614502	73664837	uc001xnr.3	PSEN1	TGAAACGCTTTTTCCAGCTCTCATTTACTCCTACCTAATCTGGGAG
ASCRP001757	61	56.3333	58.3333	65.1667	56.1667	54.1667	141.833	223.667	79.8333	90	97.1667	124.333	5.94156	5.98931	6.06406	6.20686	5.91516	6.07691	6.08023	6.6732	5.96313	6.08139	5.88152	5.97274	A	A	A	P	A	A	P	P	A	A	A	P	hsa_circRNA_101398	hsa_circ_0003121	exonic	chr14	-	74203700	74204000	uc001xot.3	C14orf43	TCAAGCTCAGGATGGCAGTGGTTCTGAAGAGAAGCGGAAAAGTGTA
ASCRP001758	60.3333	54.3333	63.6667	54.6667	60.3333	58	118.667	118.667	85.5	96.1667	108	109	5.90347	5.97957	6.25748	5.91392	5.94907	6.19396	5.89328	5.82559	6.2755	6.33715	6.11314	5.78805	A	A	A	P	A	A	P	P	P	P	M	A	hsa_circRNA_101399	hsa_circ_0003448	exonic	chr14	+	74358729	74376133	uc001xoy.2	ZNF410	GTTCACTCAGGTTACATTGATTACCCACCTAGTACAACATCTTACG
ASCRP001759	70	50.6667	46.6667	71	64.3333	59	124.5	147.667	74.3333	79.8333	113.667	131.333	6.22772	5.79555	5.58037	6.345	6.22313	6.12175	5.94162	6.13601	5.75733	5.78033	6.26791	6.05374	A	A	A	P	P	A	P	P	A	A	P	P	hsa_circRNA_101400	hsa_circ_0032627	exonic	chr14	+	75355797	75356052	uc001xqs.3	DLST	TGGGAGAAAGCATTAACAACAGTGTCTTCAGTGTTCGCTTTTTCAG
ASCRP001761	79.5	70.3333	62.1667	79.3333	81.1667	66.8333	128.667	174.333	88.3333	96	110.5	170.667	6.48597	6.57148	6.2417	6.55016	6.57847	6.51621	5.9817	6.32629	6.2953	6.30259	6.17326	6.47536	P	P	A	P	P	P	A	P	P	P	P	P	hsa_circRNA_101402	hsa_circ_0032644	exonic	chr14	-	75506613	75509180	uc001xrd.1	MLH3	TTCATTCAATGCAGGGTCTCAGTACAGGTGTCAACCTTTTAGAAGC
ASCRP001763	113.167	107.833	106.167	108.667	127.5	130.667	300.667	443.5	178.5	159	247	482.167	7.13305	7.49788	7.13883	7.07737	7.43655	7.78867	7.03782	7.70784	7.76138	7.34118	7.84905	8.03348	P	P	P	P	P	A	P	P	P	P	P	P	hsa_circRNA_101404	hsa_circ_0032664	exonic	chr14	-	75563802	75590926	uc001xrl.3	NEK9	ATACCATTCTCATCGTTGGATGACTCACTGGTTGTGTGGAAGGAAG
ASCRP001764	58.3333	51	48.5	53.5	57.6667	51.8333	213.667	361.333	75.3333	78	94.3333	181.833	5.79837	5.77256	5.73961	5.80376	5.95271	5.83202	6.6009	7.37886	5.83497	5.71518	5.78665	6.57475	A	A	A	M	A	A	P	P	A	A	A	P	hsa_circRNA_101405	hsa_circ_0003670	exonic	chr14	-	75567694	75570700	uc001xrk.3	NEK9	GCCACTGATGGTGGATGTTCCCAAGGCCTTGATTATTGTTGCAGTT
ASCRP001766	558.833	551	727	385	846.333	963.833	485.833	777	367.667	266.167	522.167	5679.33	9.70092	10.2767	9.86671	9.34947	10.1944	10.4583	7.68617	8.52089	8.92082	8.21765	9.11477	10.8441	P	P	P	P	P	P	P	P	P	P	A	P	hsa_circRNA_101407	hsa_circ_0032683	exonic	chr14	-	75590748	75590926	uc001xrl.3	NEK9	AGCTGGAATATTGTAATGGATGACTCACTGGTTGTGTGGAAGGAAG
ASCRP001767	4912.17	2630.83	3139.17	2483.67	6887.33	4805.5	1523.83	2256.33	1832.83	1200.5	2470.83	55577	12.5686	12.4135	12.1863	11.9619	12.752	12.4798	9.50449	10.4079	11.6376	10.9679	11.7407	13.9054	P	P	P	P	P	P	P	P	P	M	P	P	hsa_circRNA_101408	hsa_circ_0032704	exonic	chr14	+	76173360	76187046	uc001xrx.3	TTLL5	AGTTGTTTTGCCAAACCAGATCTCCCTGGAAGAGAACATTTTGGTC
ASCRP001769	73	59.3333	66	59	62.6667	61.5	136.333	132	91.6667	93.5	108	119.667	6.34256	6.1856	6.30481	6.01614	6.11883	6.25593	6.04713	5.97469	6.3813	6.20898	6.08671	5.93085	P	A	A	P	A	A	P	P	P	P	A	P	hsa_circRNA_101410	hsa_circ_0032725	exonic	chr14	+	76248829	76249873	uc001xrx.3	TTLL5	CAGCAAAGGCAGATCACCCTGAGACTATAATGGAAGAAGTGAAAAT
ASCRP001771	139.167	136	90.6667	185.333	125.667	97.1667	1187.83	2488.33	121	145.333	187.5	382	7.50882	7.92732	6.86763	8.0971	7.41302	7.28087	9.06989	10.5659	7.05801	7.18205	7.28679	7.71681	P	P	P	P	P	P	P	P	P	P	P	P	hsa_circRNA_101412	hsa_circ_0005252	exonic	chr14	+	76633005	76662315	uc001xsl.3	GPATCH2L	CTTTGTCTAGCCCCAGTGCAGTGAAACCAGCAGTGTGTGTAGCAGC
ASCRP001772	71.6667	69.8333	61.5	62.1667	63.3333	60.6667	140.167	192.667	76	85.6667	95.3333	141.333	6.28279	6.54631	6.16655	6.13883	6.11568	6.27291	6.0882	6.47213	5.82788	5.95604	5.8104	6.18886	P	A	A	P	A	A	A	P	A	P	A	P	hsa_circRNA_101413	hsa_circ_0032742	exonic	chr14	+	76638185	76662315	uc001xsl.3	GPATCH2L	CCCAGTGCAGGTGATGACGAACAGAGTGATTGGTTCTATGAAGGAG
ASCRP001773	80.8333	66.1667	66.5	80.8333	77	60.8333	125	139	91	90.6667	99.6667	119.5	6.4859	6.44349	6.32827	6.57678	6.53359	6.29558	5.96062	6.00794	6.35946	6.11857	5.93255	5.93344	P	A	A	P	P	A	P	P	P	P	P	P	hsa_circRNA_101414	hsa_circ_0032746	exonic	chr14	+	76642965	76662315	uc001xsl.3	GPATCH2L	CCCAGTGCAGGAGACCAGCATAAACACTTTGGGGACTGAGAGGATA
ASCRP001774	79.1667	60.5	70.3333	65.5	69	63.5	158	164.5	89.8333	104.667	130.5	160.667	6.47325	6.23057	6.45555	6.18987	6.26493	6.38126	6.2153	6.27193	6.34902	6.44955	6.55077	6.37864	P	A	P	P	P	P	P	P	P	M	P	P	hsa_circRNA_101415	hsa_circ_0032777	exonic	chr14	+	77930940	77934851	uc001xtw.3	AHSA1	TGGCCAGAGGAGTTCACCCAGGGCATGATCTTACCTACAATGAATG
ASCRP001778	3010	3590	1342.67	1359.17	1901.67	1128	1466.33	1184.67	493	969.333	1252.5	2193	11.9093	12.7541	10.987	11.1089	11.177	10.6752	9.42382	9.16049	9.39106	10.5628	10.6961	9.83082	P	P	P	P	M	A	P	P	P	P	P	P	hsa_circRNA_101419	hsa_circ_0032832	exonic	chr14	-	81837331	81837529	uc001xvk.1	STON2	GACTCAACTGCCCTACCATTGACCATGCCCTGCTGGACATGCCCTT
ASCRP001779	67.6667	59.6667	64.3333	62.1667	67.6667	58.3333	138.167	132	85.6667	104	103.5	126	6.17844	6.20237	6.28853	6.10237	6.28108	6.22022	6.06069	5.95621	6.28681	6.47011	6.05307	6.0101	A	A	A	P	A	A	P	P	P	P	A	P	hsa_circRNA_101420	hsa_circ_0032858	exonic	chr14	-	89093181	89110855	uc001xxf.3	EML5	TGCAGACCATGCTCGCTATTGCATTTGGTGCAGCCTCCAGTGAGCA
ASCRP001784	106.833	95.3333	110.333	91.8333	116.333	98.3333	175.667	228.5	140	134.333	162.5	327.833	6.97655	7.22456	7.16174	6.80283	7.27947	7.30028	6.35316	6.70165	7.37214	7.01591	6.98046	7.49583	P	P	A	P	P	P	P	P	P	A	P	P	hsa_circRNA_101425	hsa_circ_0000560	exonic	chr14	-	91247081	91252672	uc001xyp.3	TTC7B	ACGCTACCAAAGATGACATGGCAGAGCTTCTCCTCGGGGAGTCGAA
ASCRP001786	56.3333	51.6667	46.6667	78.8333	59	51.3333	266.833	489.333	77	82	113	177	5.77644	5.86756	5.59465	6.40474	6.0242	5.75931	6.88402	7.86402	5.84323	5.84349	6.22059	6.54147	A	A	A	A	A	A	P	P	A	A	P	P	hsa_circRNA_101427	hsa_circ_0003045	exonic	chr14	-	91947919	91952074	uc001xzp.1	SMEK1	CATGTTGCAGGACACTCTGATTGTGTGGTCTGAAGCAGAAAATTAT
ASCRP001788	94.1667	64	99.8333	66.3333	73.8333	62.3333	817.333	298.5	122.5	145	143.167	171.333	6.77197	6.41056	7.01113	6.21173	6.43342	6.29712	8.45263	7.09243	7.09492	7.14204	6.74553	6.44994	P	A	P	P	P	A	P	P	P	A	P	P	hsa_circRNA_101429	hsa_circ_0033010	exonic	chr14	-	93182480	93183806	uc001yat.3	LGMN	TCCTGAAGAGCAATCCCACTCCAGGAATTGTGATCAACAGGCCCAA
ASCRP001790	91.5	80.8333	85	89.1667	96.8333	74.5	253.667	175.5	114.667	139.5	134.833	188.333	6.70552	6.86879	6.76276	6.76469	6.93458	6.72941	6.82862	6.34439	6.94006	7.08655	6.63864	6.63517	P	P	P	P	P	P	P	P	P	P	A	P	hsa_circRNA_101431	hsa_circ_0006947	exonic	chr14	-	93760203	93761283	uc001ybo.3	BTBD7	AATTTAACATGCTTGCACAAGGGACCTCATCCTATTCTCAGCAAGG
ASCRP001793	86.6667	56	58.6667	92.8333	109.5	60.6667	444	160.667	162.667	133	205.667	251.333	6.60194	6.06387	6.11127	6.81805	7.13441	6.28345	7.5378	6.22565	7.60536	6.96901	7.45555	7.12249	P	A	A	P	P	A	P	P	P	P	P	P	hsa_circRNA_101434	hsa_circ_0033126	exonic	chr14	+	97026985	97029230	uc001yfr.3	PAPOLA	TGGCCTCTCAGGATGAAACAAGTGAAGATGCTAACTGTCTTGCTTT
ASCRP001795	102.5	60	58.3333	144.5	120.333	72.6667	172.167	307.833	96	91.8333	189.833	378.5	6.89993	6.18915	6.097	7.62495	7.3266	6.70387	6.32072	7.12764	6.53634	6.20441	7.31082	7.70077	P	A	A	P	P	P	P	M	P	P	P	P	hsa_circRNA_101436	hsa_circ_0000567	exonic	chr14	-	99924615	99932150	uc021sbn.1	SETD3	AGTCATCCAGTCAGAAAAATGGGTAAGAAGAGTCGAGTAAAAACTC
ASCRP001796	201.333	147.167	240.333	197.833	221	163.333	468.833	488	237.333	341.833	332.5	439.667	8.14574	8.12373	8.39155	8.24498	8.34863	8.11536	7.6413	7.84762	8.29331	8.66685	8.3589	7.88057	A	P	P	A	P	P	A	P	P	P	P	M	hsa_circRNA_101437	hsa_circ_0033163	exonic	chr14	+	100384118	100387214	uc001ygr.3	EML1	TACTCACCAGGATCCAGCTCAGTCTTCTGGTTTTCATCCTTCAGGG
ASCRP001799	77.5	81	55	108	72.6667	53.8333	502.167	1187	91.3333	108	129.167	367.333	6.44167	6.91988	5.97171	7.09974	6.38804	6.00863	7.73032	9.1563	6.39727	6.56459	6.56099	7.65897	P	P	A	P	P	A	P	P	P	P	P	P	hsa_circRNA_101440	hsa_circ_0003831	exonic	chr14	+	102368055	102372866	uc001ykk.3	PPP2R5C	ATTGGAACAAGTGGTGATGGCACTTCTCAAATACTGGCCAAAGACT
ASCRP001800	15906.2	10419.7	11805.2	10941.3	18534	16875.8	12667.3	13933.2	10154	8270.17	10921	44988	14.1736	14.1774	14.042	14.0656	14.0149	14.0871	13.438	13.6906	14.1691	14.3988	13.9938	13.6259	P	P	P	P	P	P	P	P	P	P	A	M	hsa_circRNA_101441	hsa_circ_0033408	exonic	chr14	+	102842986	102931626	uc010txx.2	TECPR2	ACCTGTCCAGCCCCCAGGTTTCCCTAGATGACAAATAAACATTCCT
ASCRP001801	138.833	94.8333	143.333	103.667	136.667	120.667	289.833	246.833	167.333	202.5	215.333	278.833	7.49514	7.21355	7.62003	7.04224	7.54968	7.65264	6.99978	6.82675	7.65178	7.78331	7.56306	7.28444	P	P	P	P	P	P	P	P	P	P	P	A	hsa_circRNA_101444	hsa_circ_0004166	exonic	chr14	+	103336521	103342862	uc001ymc.2	TRAF3	ATCGCGCTGCAGAACTCCTCTTTCCTAAAATGGAGTCGAGTAAAAA
ASCRP001802	63.6667	51.3333	52.3333	65.6667	66.3333	55.6667	113.833	126	79	85.8333	111.167	161	6.06081	5.85748	5.88305	6.22804	6.20724	6.09313	5.86727	5.90036	6.02587	6.06944	6.21895	6.36998	A	A	A	P	P	A	P	P	A	M	P	P	hsa_circRNA_101445	hsa_circ_0008995	exonic	chr14	+	103871412	103871604	uc001ymw.4	MARK3	TAAAATTGGCAAGACATATCCTTACAGGCAGAGAGCACACGTCACA
ASCRP001805	80	74.8333	113.833	78.1667	79.8333	78.5	1422.5	145.667	280.833	345.333	342	318.667	6.4619	6.72526	7.25372	6.51541	6.58673	6.82461	9.24399	6.08631	8.54615	8.68342	8.40977	7.45486	P	P	P	P	P	P	A	P	P	P	P	P	hsa_circRNA_101448	hsa_circ_0005309	exonic	chr14	-	105718843	105739231	uc001yqp.2	BRF1	CCGGCCATAGGGAGGCGCCACATCCACCACCTGGGGAACCAGCTGC
ASCRP001806	94.6667	84.5	89.3333	102.5	86.3333	86.1667	224.833	249.667	109	125.833	132.833	183.833	6.71931	6.99551	6.84866	6.98003	6.70743	6.97838	6.66298	6.83166	6.86667	6.87578	6.56542	6.57718	A	P	P	P	P	M	P	M	P	P	M	P	hsa_circRNA_101450	hsa_circ_0033598	exonic	chr14	+	105818714	105821514	uc001yqs.2	PACS2	CATGGCTGAGGGCTCCAAACGAATCCTGCGGTCCCATGAGATTGTG
ASCRP001808	285	162.667	287	198.333	223.333	210.333	774.333	739.833	241.833	395.167	421.667	625	8.75892	8.29235	8.65916	8.24267	8.3773	8.54224	8.36014	8.4404	8.32249	8.92943	8.74939	8.36666	P	P	P	P	P	P	P	P	P	P	P	P	hsa_circRNA_101457	hsa_circ_0004934	exonic	chr15	-	20671447	20671623	uc001ytg.3	HERC2P3	GTCTCATAAGCTTTTGTCTGGTCCTCTGAGCCCCAGTGAGAGTTTC
ASCRP001809	111.667	93.3333	92	77.5	95.6667	86.6667	187.167	180.833	121.333	110.167	119	233.833	7.11232	7.15559	6.88231	6.48171	6.89256	7.04626	6.43688	6.366	7.0586	6.55524	6.28606	7.00889	P	P	P	M	P	P	P	P	P	P	M	A	hsa_circRNA_101458	hsa_circ_0034044	exonic	chr15	-	20671447	20688770	uc001ytg.3	HERC2P3	CTCCGACGTCTCATAAGCTTGCATTCACAAGAGATGGGCTCTGTGG
ASCRP001810	63	64	83.6667	56.3333	66.3333	59.5	197.667	219.833	102	110.667	132.333	118	6.00738	6.40586	6.72718	5.99879	6.16988	6.21125	6.51271	6.64755	6.67702	6.48808	6.57021	5.90543	A	A	P	P	P	A	P	P	P	M	P	P	hsa_circRNA_101459	hsa_circ_0034049	exonic	chr15	+	22835915	22846952	uc001yuq.2	TUBGCP5	AAACCCTATGATTTCATCGTTTCTTGGATGTCAACAGCCACAAAAT
ASCRP001812	82.1667	81.1667	89.8333	75.5	66.6667	63.6667	181	132	99	87.5	95.6667	105.833	6.52889	6.913	6.84957	6.46969	6.21379	6.30261	6.39146	5.94978	6.60953	6.02967	5.84246	5.72907	P	P	A	P	A	A	P	P	P	A	A	A	hsa_circRNA_101461	hsa_circ_0034072	exonic	chr15	+	22940727	22947086	uc010aya.1	CYFIP1	ACACCAGCGAGGAGAAGTTTGCCCTAGTGGAGATGGACGTGCACAT
ASCRP001813	72.5	53.5	51.3333	85.3333	79.5	59.3333	188	106.833	77.6667	80.5	116.5	159.667	6.2994	5.93692	5.75361	6.6458	6.57381	6.19265	6.44898	5.70146	5.88324	5.77324	6.28695	6.37286	P	A	A	A	P	A	P	P	A	A	P	P	hsa_circRNA_101462	hsa_circ_0034168	exonic	chr15	-	25650607	25654354	uc001zau.2	UBE3A	AAGCTAGCCGAATAGTTATTAAGCCTACGCTCAGATCAAGGTAGCA
ASCRP001815	119.667	137.833	143	137.667	123.833	99.1667	482.833	196.167	146.667	161	163.667	213.833	7.21505	7.92915	7.57912	7.53611	7.36739	7.2773	7.68014	6.48862	7.42798	7.37503	7.03044	6.84237	P	P	P	P	P	P	P	P	A	P	P	P	hsa_circRNA_101464	hsa_circ_0034182	exonic	chr15	-	26825465	26828561	uc001zaz.3	GABRB3	TTCGCCACAGAATCACCACGACAGCAGCATGCATGATGGACCTCAG
ASCRP001816	437	273.5	344.5	284	435.5	339.833	682	916	347.667	340.333	450.167	8300.5	9.37095	9.14606	8.92267	8.82927	9.33175	9.19842	8.1688	8.78412	8.83863	8.64475	8.88008	11.2377	P	P	P	P	P	P	P	M	P	P	P	P	hsa_circRNA_101465	hsa_circ_0034189	exonic	chr15	-	28090104	28096621	uc001zbh.4	OCA2	TATGGGTTCTCCTTCATGGAATTTTTCAGATTCCCGTGCTCCTGAA
ASCRP001818	91.3333	80.8333	97.1667	86.8333	96	80.8333	247.667	280.167	118.333	145.333	166.333	205.333	6.68422	6.8731	6.96905	6.70451	6.90004	6.86849	6.80603	7.01344	7.03848	7.15378	7.05644	6.77765	P	P	P	P	P	P	P	P	P	P	P	P	hsa_circRNA_101467	hsa_circ_0034293	exonic	chr15	-	30053341	30065560	uc010azl.3	TJP1	AAGCAATGGCAGGCTCCTGGATTTGGATTTGGAATTGCAATATCTG
ASCRP001820	161.5	121.333	137.333	124.333	163.667	113.5	219	311.333	168	139.833	168.667	691.167	7.80162	7.73904	7.55013	7.35695	7.83384	7.54607	6.63937	7.15563	7.65914	7.11503	7.10987	8.48308	P	P	P	P	P	P	P	P	A	P	P	A	hsa_circRNA_101469	hsa_circ_0034325	exonic	chr15	-	31947298	31949280	uc001zfr.3	OTUD7A	AGACCTGCTGGAAGGTGGCAGTGACGAAAGAAGAGACTCTCCCGGC
ASCRP001821	322.667	294.833	301.667	354.5	337.667	263.167	698.167	1042.67	382	427.333	401.167	818.833	8.93004	9.28431	8.71952	9.20587	8.95544	8.90611	8.20271	8.95846	8.98274	9.06869	8.67674	8.72318	P	P	P	P	P	P	P	P	A	P	P	P	hsa_circRNA_101470	hsa_circ_0034326	exonic	chr15	-	31947298	31981684	uc001zfs.1	OTUD7A	ACCTGCTGGAAGAGTTCTCAGGCGCTGTGGTCTCACCTTCCACTGG
ASCRP001822	144.833	113	194.833	111	118.167	90	5445.83	610	1422	1246.67	1519	1671.33	7.61687	7.57754	8.07325	7.14556	7.28513	7.11393	12.0947	8.17177	11.3153	11.0434	11.0349	9.59171	P	P	P	P	P	P	P	P	P	P	A	P	hsa_circRNA_101471	hsa_circ_0034398	exonic	chr15	+	36936478	36950106	uc001zje.4	C15orf41	GAGGAAACTCCACTCAATCGCAGGCCACTCTGCTGAGCATCTTCTC
ASCRP001825	176.333	148.167	208.667	170.333	180.667	187.167	373.667	363.5	188.5	201.167	195.833	226.667	7.92873	8.11521	8.16144	7.91969	8.0205	8.34938	7.29789	7.39978	7.88299	7.76309	7.35949	6.95733	P	A	P	P	P	P	P	P	P	P	P	A	hsa_circRNA_101474	hsa_circ_0034510	exonic	chr15	+	39882005	39882224	uc010bbi.3	THBS1	TTACCACTGCAAAAAGGTGTGCAAGCCCCGTAACCCCTGCACGGAT
ASCRP001827	59.6667	48.1667	52.3333	49.3333	52.5	57.1667	150.833	132.5	79	86.6667	102.167	114.667	5.86248	5.63755	5.86577	5.7469	5.75234	6.05092	6.18052	5.97022	6.0063	6.03701	5.98165	5.86455	A	A	A	A	A	A	P	P	A	P	A	P	hsa_circRNA_101476	hsa_circ_0034557	exonic	chr15	+	40301814	40311401	uc010bbj.1	EIF2AK4	CTGCTGTCCTCAACATGGAGGAATCTGAAAGAAATTACAGTATTTA
ASCRP001829	405.667	355.5	460.333	299.667	445.333	266.5	656.667	643.5	311.5	348.833	384.667	1277.17	9.27637	9.57401	9.29555	8.89944	9.35435	8.92978	8.10849	8.25396	8.69774	8.70317	8.62695	9.25865	P	A	P	P	P	P	A	P	P	P	P	P	hsa_circRNA_101478	hsa_circ_0008946	exonic	chr15	+	40477365	40477843	uc010ucl.1	BUB1B	AGCCAGTTATCTCCAAGCCAGAACAGAGGACTCCAAAATCCATTTC
ASCRP001832	61.8333	52	54.6667	61	66.3333	52.6667	106.5	113.833	80	82.1667	102.5	107.833	5.92086	5.80652	5.97907	6.08414	6.21151	5.92468	5.78459	5.76724	6.00484	5.90394	6.0334	5.79352	A	A	A	P	P	A	P	P	A	A	P	P	hsa_circRNA_101481	hsa_circ_0004942	exonic	chr15	-	41036244	41037457	uc001zmo.1	RMDN3	TGAGCGAGAAGAAGTCATATGCCCTAGATGTTACACAACAGCCAAT
ASCRP001835	65.3333	49.3333	44.3333	78	73	48.3333	130.333	134.167	68.8333	73.6667	122.333	193.5	6.12695	5.6699	5.56768	6.48783	6.37127	5.65989	5.98962	5.97009	5.48402	5.52573	6.43792	6.68258	A	A	A	P	P	A	P	P	A	A	P	P	hsa_circRNA_101484	hsa_circ_0007489	exonic	chr15	-	41361767	41362745	uc001zni.3	INO80	CTAAATTTAAGGGTATTAATGGCATTCTTGCTGATGAAATGGGCCT
ASCRP001837	213.5	204.5	260.667	197.5	252	215.833	579.667	459.333	267	332.333	336.667	631.333	8.2432	8.66233	8.51311	8.22908	8.55751	8.57769	7.9245	7.75457	8.47381	8.60137	8.38532	8.37938	P	M	P	P	M	P	M	P	P	P	P	P	hsa_circRNA_101486	hsa_circ_0034682	exonic	chr15	+	41535864	41555081	uc001znl.3	CHP	GAAGCAACAAACTGCACTTTTCCCACAGTCAAATCACTCGCCTCTA
ASCRP001839	62.1667	52.6667	43	66	66.1667	49.3333	162	198	66.3333	71.5	90.3333	199.667	5.97197	5.84952	5.46248	6.17581	6.19192	5.68378	6.24205	6.49246	5.38537	5.40967	5.67953	6.71614	A	A	A	P	A	A	P	P	A	A	A	M	hsa_circRNA_101488	hsa_circ_0000591	exonic	chr15	+	41961025	41962156	uc001zog.1	MGA	TTTCTGAATGGATGGGAAGGCCATTGTGACTATGTGGTGATTACAG
ASCRP001841	69.1667	56.8333	58	70.3333	76.3333	61.6667	133	178.167	79	85.3333	108	207.5	6.21074	6.07629	6.10149	6.33776	6.51487	6.30178	6.0277	6.3696	6.02651	6.00618	6.11385	6.79451	P	A	A	P	P	A	P	A	A	A	A	P	hsa_circRNA_101490	hsa_circ_0000592	exonic	chr15	+	41988272	41991357	uc001zog.1	MGA	CCTGGTCTTCAAGAAGTCTTATTGCCAGCAGTTTTGAAGATGACTC
ASCRP001842	5487.17	5917.17	2778.83	9424.83	6687.17	4015.33	33684.7	40006.7	4438.17	6466.5	10295.3	27246.5	12.6905	13.2798	12.0861	13.8927	12.7059	12.2185	14.9515	15.2137	13.0187	13.9428	13.8978	12.8929	P	P	P	P	P	P	P	M	M	P	P	M	hsa_circRNA_101491	hsa_circ_0034762	exonic	chr15	+	42103080	42105299	uc001zoj.4	MAPKBP1	GGAGCTGAGGGTGTGTGGTTGTGTTGTTCAATCCCCGGAAACACAA
ASCRP001843	920.167	624.333	960.333	860.333	1337.67	1072.67	1189.17	1435.17	825	1024.83	1048.17	3602.17	10.4697	10.4988	10.3839	10.6439	10.7565	10.6295	9.07206	9.51004	10.3152	10.6847	10.3625	10.3413	P	P	P	P	P	P	P	P	P	P	P	P	hsa_circRNA_101492	hsa_circ_0034786	exonic	chr15	-	42470415	42470768	uc001zpc.3	VPS39	TGAATTGGCTCTGCAGCTCGCAAGCACCAGCCTCCCTACATCATTG
ASCRP001846	104.667	69.8333	107.333	65	79	80.6667	320.833	295.667	196.333	138.833	151.667	185.167	6.97181	6.56298	7.14214	6.21131	6.53199	6.942	7.11823	7.0825	7.94828	7.05906	6.87737	6.61317	P	A	P	P	P	P	P	P	P	P	P	P	hsa_circRNA_101495	hsa_circ_0003838	exonic	chr15	-	43086841	43109295	uc010bcy.2	TTBK2	GCTTGACCCCTGCTGCAATTGGCCTCGAGCTGTGGCAGGTTTTCGA
ASCRP001852	73	60.5	83.6667	71.1667	78.8333	72	174.333	164.833	109.167	125.333	135.167	156.167	6.28666	6.2223	6.73633	6.36767	6.54385	6.69225	6.34088	6.25749	6.83562	6.85035	6.64729	6.31592	P	A	P	A	P	P	P	P	P	P	A	P	hsa_circRNA_101501	hsa_circ_0034953	exonic	chr15	+	43668295	43669265	uc001zrn.3	TUBGCP4	TGTCAACTACTTCCTAGACCAGGTATCGCAGGACTTCCCTTTCCTC
ASCRP001854	159	111.5	106	123	103.667	101.5	298.333	718.333	114.333	146.333	173.5	761.333	7.77926	7.55335	7.13762	7.3406	7.04225	7.34399	6.9254	8.39889	6.91495	7.14575	7.09229	8.60945	P	P	P	P	P	A	A	P	P	M	P	P	hsa_circRNA_101503	hsa_circ_0034972	exonic	chr15	+	43692241	43694048	uc001zrn.3	TUBGCP4	GCTGGCTCAATCCTTTATCCTATTGAAACCTGTACAATGTTGTTTT
ASCRP001855	67.6667	60.6667	56.5	68.3333	60.6667	55.8333	217.167	338.333	79.6667	86	136	177.333	6.11982	6.23124	5.98129	6.26867	6.03236	6.00647	6.62465	7.28945	6.09746	6.02352	6.64896	6.52102	A	A	A	P	A	A	P	P	A	P	P	P	hsa_circRNA_101504	hsa_circ_0002151	exonic	chr15	+	44046021	44048964	uc001zsu.3	PDIA3	AGGACTGCTGGTGTGGACACTGCAAGAGACTTGCACCTGAGTATGA
ASCRP001856	72	57.6667	55.5	74.6667	72.1667	67.3333	190.333	165.333	87.6667	98.6667	130.667	140.833	6.24972	6.04111	6.00059	6.4424	6.38721	6.46607	6.44127	6.28489	6.2859	6.34316	6.55457	6.17301	A	A	A	P	P	A	P	P	P	P	A	P	hsa_circRNA_101505	hsa_circ_0002891	exonic	chr15	+	44048846	44055404	uc010ued.2	PDIA3	ATAATGGAGAGTTGATTGCACTGCCAACACTAACACCTGTAATAAA
ASCRP001857	60.3333	60.1667	56.8333	64.1667	69.6667	59.8333	347.167	259.167	83.3333	82.3333	100.667	112.667	5.9373	6.19995	6.00289	6.16213	6.34323	6.23112	7.20619	6.88908	6.1592	5.91902	5.96002	5.83535	A	A	A	A	P	A	P	P	A	A	P	P	hsa_circRNA_101506	hsa_circ_0003598	exonic	chr15	+	44053621	44055404	uc010ued.2	PDIA3	ATGATAATGGAGAATGGAATTGTCAGCCACTTGAAGAAGCAGGCAG
ASCRP001859	63.1667	60.1667	59.3333	58.1667	65	62	102.833	128.333	84.5	90	102	118.5	6.01008	6.16697	6.12217	5.98337	6.16072	6.21999	5.73841	5.91617	6.18554	6.10642	6.00119	5.89654	A	A	A	P	P	A	P	P	P	P	A	M	hsa_circRNA_101508	hsa_circ_0007705	exonic	chr15	+	44788577	44789336	uc001zts.3	CTDSPL2	TTTAGACTTGCACCAGTAACTCCAGATAGTGGTTATTCATCAGCCC
ASCRP001860	285.167	196.5	295.5	218.667	215.167	214.667	644.167	674	271.5	345.333	338.333	541.833	8.76527	8.61105	8.68068	8.44146	8.32462	8.56038	8.07957	8.31058	8.50383	8.66351	8.38771	8.20292	P	A	P	P	P	P	P	A	P	M	M	P	hsa_circRNA_101509	hsa_circ_0035072	exonic	chr15	-	44859621	44861703	uc001ztx.3	SPG11	AATTGATTGAGTCTCAGCCCTGGGGTACGGCTCCTCACTGGCATTG
ASCRP001861	136.333	101.167	132.667	95.5	99.6667	103.667	280.167	247.5	120	140.5	142.667	174.833	7.49193	7.3483	7.49939	6.85534	6.94001	7.38369	6.9492	6.83538	7.049	7.07817	6.7445	6.49303	M	P	P	P	P	P	P	P	P	P	P	P	hsa_circRNA_101510	hsa_circ_0035074	exonic	chr15	-	44859621	44865018	uc001ztx.3	SPG11	TGAAATTGATTGAGTCTCAGCCCTGGGGACATAAGCAGATGTTCAA
ASCRP001862	67.6667	65.6667	62.1667	65.6667	66.5	65.6667	171.333	119	83	89.6667	101.667	104.667	6.15072	6.44119	6.24039	6.17655	6.21728	6.47793	6.31203	5.83114	6.15306	6.06179	5.95462	5.72992	A	A	A	P	A	P	P	P	A	P	A	A	hsa_circRNA_101511	hsa_circ_0007457	exonic	chr15	-	44898222	44903183	uc001ztx.3	SPG11	AGTCTGCTAACACACTAGCTATAGGAGATCCCAAACTGATCTTCCA
ASCRP001863	139.5	95	162.167	131.5	151	135.167	280	327.167	161.333	223.667	247.5	273.167	7.51332	7.23468	7.78303	7.44256	7.70368	7.84783	6.94945	7.22415	7.58684	7.93671	7.82991	7.25731	P	P	P	P	P	P	P	P	P	P	P	P	hsa_circRNA_101512	hsa_circ_0003784	exonic	chr15	-	44907560	44912601	uc001ztx.3	SPG11	ACTGTTACAAAATACAAATCATATTCCCCTGAAGCCCTCTGGAGAT
ASCRP001864	63.5	52.6667	46	79.3333	71.6667	57.1667	113.667	142.667	77.1667	76.6667	119.333	181.833	6.01971	5.8414	5.63321	6.56622	6.37181	6.11448	5.86098	6.06161	5.90076	5.6485	6.33156	6.5903	A	A	A	P	P	A	P	P	A	A	P	P	hsa_circRNA_101513	hsa_circ_0008488	exonic	chr15	+	49528047	49531564	uc001zxi.1	GALK2	ATCTATCCAAGGGACTTCAGTACTAGTGCTAATAACATCCAGATTG
ASCRP001865	63.3333	49.3333	46	76.1667	69.6667	52.3333	107.5	144.333	76.8333	75.1667	109.833	164.167	5.95112	5.65482	5.59098	6.47169	6.33018	5.93213	5.76785	6.08552	5.90392	5.61726	6.11398	6.41021	A	A	A	P	P	A	P	M	A	A	M	P	hsa_circRNA_101514	hsa_circ_0035189	exonic	chr15	+	49528047	49584734	uc001zxi.1	GALK2	CACTCAAGATGGGACTTCAGTACTAGTGCTAATAACATCCAGATTG
ASCRP001867	64.8333	60	54	62.8333	70.3333	58.3333	149.167	120.167	83	88.8333	107	131.833	6.10306	6.21104	5.91159	6.11981	6.31017	6.11722	6.14971	5.8366	6.16334	6.0943	6.06853	6.07667	A	A	A	P	P	A	P	P	P	P	P	P	hsa_circRNA_101516	hsa_circ_0002551	exonic	chr15	-	50592985	50593565	uc001zya.3	GABPB1	GAAACTCCAGATTGCTATGCAGAACCAAATCAACACAAACCCAGAG
ASCRP001868	159.333	118.833	209	120	170.5	131	473.333	299.5	201.167	191.167	199.833	657.833	7.77365	7.6965	8.18079	7.29867	7.92347	7.80443	7.65576	7.0921	7.98893	7.67578	7.41687	8.42608	A	P	P	P	P	P	M	P	P	P	P	A	hsa_circRNA_101517	hsa_circ_0007983	exonic	chr15	-	50592985	50596330	uc001zya.3	GABPB1	GAAACTCCAGCTGGGAACTTCTCCACTTCATCTAGCAGCACAGTAT
ASCRP001869	71.8333	60	71.8333	58	66.8333	60.3333	182	198.667	85.6667	105	122	172.167	6.28601	6.17667	6.50612	6.02019	6.25054	6.28161	6.39378	6.49596	6.24643	6.47421	6.38233	6.47374	A	A	P	P	P	A	P	P	P	A	P	P	hsa_circRNA_101518	hsa_circ_0003501	exonic	chr15	-	50592985	50601995	uc001zya.3	GABPB1	GAAACTCCAGATGTCCCTGGTAGATTTGGGAAAGAAGCTTTTAGAA
ASCRP001872	60.5	54	52.8333	59	61.1667	49.3333	97.1667	107.667	84.1667	84.6667	102	106.833	5.9236	5.95132	5.85714	6.03767	6.088	5.67979	5.68144	5.70139	6.26717	5.94376	6.02182	5.77006	A	A	A	P	A	A	M	P	A	A	P	P	hsa_circRNA_101521	hsa_circ_0004951	exonic	chr15	-	50935536	50955243	uc010bew.2	TRPM7	GTAAACACAGTCCCAGAAATCCTGGATAGAAAGCACTTTGACCAAG
ASCRP001873	113.833	110.667	132.167	158	125.833	106	500.667	689.167	114	127.167	150	163	7.10224	7.54649	7.47349	7.75905	7.37215	7.42382	7.7278	8.3369	6.95136	6.9103	6.83503	6.40124	P	P	P	P	M	M	P	P	M	P	P	P	hsa_circRNA_101522	hsa_circ_0035277	exonic	chr15	-	51743841	51747425	uc002abd.3	DMXL2	ACACATTAATATCACCCGGAAACAGCCTCATTCATGTGTGGTGTTG
ASCRP001874	139.833	104	187.833	121.667	145.5	124	423.5	399.667	189.667	255	247.5	246.667	7.52781	7.43608	8.01327	7.33831	7.63577	7.71252	7.48381	7.53781	7.8926	8.14923	7.83642	7.07508	P	P	P	P	P	P	P	P	P	P	A	P	hsa_circRNA_101523	hsa_circ_0035292	exonic	chr15	+	52161413	52194233	uc002abn.3	TMOD3	TAACAAAAAACAATGACTTAGAATGCCCTTCTGCCTGCAGGGTTCC
ASCRP001875	79.3333	71.8333	63.6667	69.1667	61.6667	64.5	227.833	329.667	78.5	93.1667	114.333	144.333	6.43821	6.64035	6.22415	6.31173	6.08842	6.40747	6.6993	7.23793	5.98874	6.18654	6.2568	6.21309	P	P	A	P	A	A	P	P	A	P	P	P	hsa_circRNA_101524	hsa_circ_0035360	exonic	chr15	+	54527227	54542642	uc021smr.1	UNC13C	TGCTTGCAGAGGCTGGAGGTGGACTTTATGGTATTGACAGCATGCC
ASCRP001876	670	509.333	444.167	548.167	566	461.167	4478	6551.33	425	700	1194.33	8399.67	9.96244	10.1329	9.2608	9.88843	9.69105	9.55243	11.7324	12.678	9.18381	9.92828	10.6088	11.2433	P	P	P	P	P	P	P	P	P	P	P	A	hsa_circRNA_101525	hsa_circ_0035381	exonic	chr15	+	55621921	55634000	uc002act.3	PIGB	GTGTTCTGTGTTTTTTTGCCAGTTGTGCTCCTGGTTCACATGGTAT
ASCRP001878	112.667	90.6667	130	109.5	120.333	110	236.667	279.333	142.333	191	205	245.167	7.10502	7.0989	7.46574	7.10693	7.35617	7.48679	6.72872	6.99306	7.38815	7.68255	7.4452	7.05674	P	P	P	A	M	P	P	P	P	P	A	M	hsa_circRNA_101527	hsa_circ_0006380	exonic	chr15	+	57523349	57526305	uc010ugm.1	TCF12	TTTGGCATCTGTATATGCACCATCCCCAAATTCAGATGATTTCAAC
ASCRP001882	84.6667	62.6667	443	48	78.1667	73.1667	439.5	112.5	148.167	98.3333	117	132.333	6.57296	6.34192	9.27142	5.69965	6.54035	6.70493	7.53512	5.77165	7.45438	6.36698	6.30503	6.07506	P	A	P	A	P	P	A	P	M	P	A	P	hsa_circRNA_101531	hsa_circ_0035445	exonic	chr15	-	58302846	58306479	uc002aex.3	ALDH1A2	ACCATTCCTGTAGATCTTTATAAACAACGAGTGGCAGAACTCAGAG
ASCRP001884	59.6667	49.3333	46	79.1667	63.5	53.6667	122	116.667	78.1667	85.5	92.5	109	5.92821	5.79697	5.61899	6.54427	6.15997	5.87755	5.93803	5.80262	5.94161	5.93551	5.76167	5.77006	A	A	A	P	M	A	P	P	A	A	A	P	hsa_circRNA_101533	hsa_circ_0003713	exonic	chr15	-	59204761	59205895	uc002afo.3	SLTM	TTCTAACAGCCCAAGACTGTGAATTGGAGAATCAAGAGGCACATGA
ASCRP001885	114.167	77.6667	70.6667	169	110.333	81.1667	221.833	182.333	92.6667	97.3333	155.333	210.333	7.14994	6.809	6.44403	7.91684	7.15717	6.93091	6.65415	6.37412	6.46784	6.31992	6.92107	6.8306	P	A	A	P	P	P	P	P	P	P	P	P	hsa_circRNA_101534	hsa_circ_0000605	exonic	chr15	-	59204761	59209198	uc002afo.3	SLTM	CTAACAGCCCAAGTAAAAAACATGAAGCAGATGAGTTGAGTGGAGA
ASCRP001886	90.1667	69.8333	114	82.3333	95.5	83.6667	223	261	126.167	164.833	178.833	282	6.68565	6.54169	7.27207	6.64203	6.88666	6.96614	6.6521	6.90367	7.154	7.41059	7.19019	7.30206	P	A	P	P	P	P	P	P	P	P	P	P	hsa_circRNA_101535	hsa_circ_0035473	exonic	chr15	+	59323002	59359282	uc002afs.3	RNF111	TCATGAACAGGCTTTCCTTAAAGTTTCCCATGTCTCAATGGACTCC
ASCRP001887	90.6667	82.3333	77.8333	83	80	81.8333	164	185.833	109.167	114	127.333	157.667	6.71877	6.91988	6.61706	6.63509	6.5747	6.92753	6.27301	6.41101	6.82575	6.62433	6.49627	6.3509	P	P	P	P	P	P	P	P	P	P	P	P	hsa_circRNA_101536	hsa_circ_0035482	exonic	chr15	+	59376327	59377984	uc002afs.3	RNF111	ATCACTTACAATTAGGAGCTCTTCCTTTAATGGCGGGCACATGAAC
ASCRP001889	78.5	69.3333	59.6667	85.3333	74	66.1667	414.833	743.167	84.5	97	172	206.5	6.45016	6.55279	6.07121	6.71611	6.45544	6.4434	7.45494	8.45027	6.15982	6.25819	7.11654	6.80048	P	A	A	P	P	A	P	P	P	P	P	P	hsa_circRNA_101538	hsa_circ_0035554	exonic	chr15	-	60648117	60656722	uc002agk.3	ANXA2	GATGGTTGCCCTGGCAAAGGTGTGGATGAGGTCACCATTGTCAACA
ASCRP001890	603.833	232.167	408.5	270.667	411.833	337	356.833	381.667	592.333	346.333	266	281.333	9.82815	8.86281	9.18225	8.75069	9.24285	9.18515	7.23784	7.47007	9.73327	8.68567	7.97239	7.29337	P	P	P	P	P	P	P	P	M	P	P	P	hsa_circRNA_101539	hsa_circ_0005402	exonic	chr15	-	60648117	60674640	uc002agk.3	ANXA2	TGATGGTTGCCCTGGCAAAGCACTCTACACCCCCAAGTGCATATGG
ASCRP001891	59.6667	52.1667	46.1667	58	53.6667	52.6667	204.667	319.333	75.1667	81.3333	105.5	120.833	5.88086	5.79101	5.6044	5.99734	5.79315	5.82374	6.54194	7.18733	5.76439	5.79168	6.02661	5.93992	A	A	A	P	A	A	P	M	A	A	P	M	hsa_circRNA_101540	hsa_circ_0035559	exonic	chr15	-	60653139	60656722	uc010uhd.2	ANXA2	GCTAAAAGCTTCCATGAAGGTGTGGATGAGGTCACCATTGTCAACA
ASCRP001892	310	170.333	266	192	230.5	255.333	283.333	297.833	379.333	251.667	195.333	211	8.87757	8.3965	8.5467	8.16165	8.42346	8.87527	6.95998	7.08692	8.96717	8.12585	7.35952	6.82635	P	P	P	P	P	P	P	P	P	P	P	P	hsa_circRNA_101541	hsa_circ_0035560	exonic	chr15	-	60653139	60674640	uc010uhd.2	ANXA2	AGCTAAAAGCTTCCATGAAGCACTCTACACCCCCAAGTGCATATGG
ASCRP001893	102	86.8333	147	84	103.333	105.333	229.5	204.833	162.5	155.167	207	180.5	6.93352	7.02721	7.65842	6.63435	7.01536	7.42236	6.69529	6.55202	7.61978	7.27835	7.46535	6.54825	P	P	P	P	P	P	P	P	P	P	P	P	hsa_circRNA_101542	hsa_circ_0005327	exonic	chr15	-	60674540	60678285	uc010uhd.2	ANXA2	AAGACCAAAGCTTCCTTCAAAATGTCTACTGTTCACGAAATCCTGT
ASCRP001894	76	64.3333	54	81.5	69.5	55.3333	156.167	143.833	91.6667	95.5	120.833	216.333	6.33539	6.31376	5.89054	6.59155	6.31261	6.01958	6.21547	6.06151	6.42324	6.28383	6.37814	6.86749	P	A	A	P	P	A	P	P	P	P	A	P	hsa_circRNA_101543	hsa_circ_0000607	exonic	chr15	-	62299506	62306191	uc002agz.3	VPS13C	GAAAGAAATTCAGACTGCAAATGAACACTGGACTCCATGCATATTA
ASCRP001895	58.6667	56.3333	61	45.5	57.3333	53.5	109.667	109.667	81.3333	85	108.5	99.3333	5.83362	6.06117	6.18983	5.60424	5.95585	5.9787	5.80351	5.72247	6.10546	5.94403	6.12218	5.66748	A	A	A	A	A	A	P	M	A	P	P	A	hsa_circRNA_101544	hsa_circ_0035626	exonic	chr15	-	63447819	63448720	uc002alx.3	RPS27L	ACTCACAGAAGTTGGCTAGAGATTTACTACATCCGTCCTTGGAAGA
ASCRP001901	129.333	61.8333	47	211.333	166.167	73.5	219.333	304	90.3333	90	176.5	241.333	7.37981	6.31614	5.61362	8.39526	7.8718	6.71727	6.63965	7.11922	6.32581	6.09975	7.17306	7.0446	P	A	A	P	A	P	P	P	P	P	P	P	hsa_circRNA_101550	hsa_circ_0035796	exonic	chr15	-	63988322	64008672	uc002amp.3	HERC1	TCACTATCAGATATCAGAAAACCAGGACTCTGCAGATGTTGATCCT
ASCRP001905	61.5	49.1667	48	71.6667	64	54.3333	107	132.667	81.1667	79.3333	108.333	153	5.96138	5.68008	5.68579	6.35417	6.10964	6.03388	5.77941	5.97089	6.04576	5.73415	6.1392	6.30281	A	A	A	P	A	A	P	P	A	A	P	P	hsa_circRNA_101554	hsa_circ_0035818	exonic	chr15	+	64410315	64415745	uc002amv.3	SNX1	TATGTAGCCTACAAAGTTACAACACAGATGCCACAGTGGAGCTATC
ASCRP001906	31642.5	20631.7	20060	15501	44704.3	29702.3	35621.3	23616.7	9436.5	4293.5	18280	138737	15.0406	15.0015	14.6698	14.4469	15.1613	14.8843	15.0555	14.664	14.0286	13.1007	14.6691	15.9227	P	P	M	P	P	M	P	P	P	P	P	M	hsa_circRNA_101555	hsa_circ_0001955	exonic	chr15	-	64495280	64508912	uc002ang.1	CSNK1G1	TCGAAATCAGGTGAAGGTCTCCCACAGGTGTATTACTTTGGACCAT
ASCRP001907	148.833	93.6667	290.667	97.3333	154.5	135.5	389.333	255.333	174	194.5	196.833	180.833	7.61036	7.17513	8.65329	6.87739	7.74939	7.83374	7.34763	6.86806	7.74198	7.68776	7.3722	6.56551	P	P	P	P	P	P	P	P	P	M	P	P	hsa_circRNA_101556	hsa_circ_0002205	exonic	chr15	-	65110144	65111422	uc002anr.2	PIF1	ATGTCCATCCACAAGAGCCAAGTAAGGTACACAGATTTGAGGCTAT
ASCRP001910	63.8333	51.3333	51.3333	66.3333	62.8333	51.3333	162.333	169.833	68.6667	77.6667	105.667	248.833	6.04575	5.78852	5.81425	6.24214	6.14778	5.80619	6.24845	6.30356	5.44666	5.74197	6.03371	7.09286	A	A	A	P	A	A	P	P	A	A	P	P	hsa_circRNA_101559	hsa_circ_0004374	exonic	chr15	-	65471271	65472542	uc002aom.3	CLPX	ACCTTTGTATGTATTTCTGGTGGTCGCATTCATATGTCAGTTTTAG
ASCRP001911	273.333	191.667	301.333	210.5	244.5	224.833	551.333	614.167	272.167	308.167	318	539.667	8.679	8.58075	8.71679	8.36354	8.51409	8.64733	7.85925	8.18397	8.50117	8.44299	8.27765	8.19579	P	P	P	P	P	P	P	P	P	A	P	P	hsa_circRNA_101560	hsa_circ_0007527	exonic	chr15	-	65759015	65772737	uc010bhj.3	DPP8	GATTCAGCAGTGCTTGGTCCATCCTACTAGATCGCTCCCAGACTCG
ASCRP001922	10189.8	7092.33	9491.33	9677.83	15060.8	12225.3	12874.8	7728	9551.33	6975	9474.67	41528.2	13.5829	13.604	13.7147	13.9317	13.6865	13.6996	13.5262	12.9402	14.0324	14.0564	13.811	13.5093	P	M	P	M	P	P	P	P	P	P	P	M	hsa_circRNA_101571	hsa_circ_0036005	exonic	chr15	+	67004005	67008836	uc002aqf.3	SMAD6	GGTGAATTCTCAGAATCTCCGCCACCTCCCTACTCTCGGCTGTCTC
ASCRP001923	65.1667	50.5	44.5	72.6667	83.8333	53.1667	133	221.667	71	75.5	120.167	307.5	6.05903	5.70027	5.58454	6.38977	6.66065	5.92103	6.02382	6.64934	5.61827	5.57302	6.38083	7.41827	A	A	A	P	P	A	P	M	A	A	A	A	hsa_circRNA_101572	hsa_circ_0000620	exonic	chr15	-	67524151	67529158	uc002aqk.4	AAGAB	GTGATGAAGAATGATATCCTTGGAACAGAAGATCTTATTGTGGAAG
ASCRP001924	56	47	45	58.3333	62.6667	46.1667	97.6667	143.667	69.6667	70.3333	96.6667	189.833	5.79075	5.57386	5.59534	6.06123	6.13731	5.63474	5.6891	6.07474	5.57138	5.36273	5.87915	6.65545	A	A	A	P	A	A	P	P	A	A	A	P	hsa_circRNA_101573	hsa_circ_0003651	exonic	chr15	-	67528316	67529158	uc002aqk.4	AAGAB	CTGAGGAGGATGATATCCTTGGAACAGAAGATCTTATTGTGGAAGT
ASCRP001926	66.1667	53	66.3333	61.3333	69.3333	56	149	199.833	86.6667	97.6667	120.667	177	6.06577	5.85795	6.30633	6.12245	6.33206	6.05199	6.1485	6.52581	6.20191	6.31239	6.37823	6.5227	A	A	A	P	P	A	P	P	P	P	P	P	hsa_circRNA_101575	hsa_circ_0036044	exonic	chr15	+	68434283	68457142	uc002aqz.3	PIAS1	TAAGGGTTTCTCTACTATGTCCACATCAGACAACAGTCAGCGCTTT
ASCRP001929	82.1667	63.3333	81.3333	61.5	70.5	66.1667	183.5	176	96.8333	115.667	120.5	127	6.50097	6.34861	6.678	6.11496	6.3479	6.51819	6.40166	6.34961	6.55635	6.65358	6.36592	6.01708	P	A	P	P	P	P	P	P	P	P	P	P	hsa_circRNA_101579	hsa_circ_0036113	exonic	chr15	+	71229099	71256271	uc002asu.3	LRRC49	TATGAAGAGAATCACGAGAGATGTGGATAATTTGCCCTGCCTCCAA
ASCRP001930	102.833	94.1667	99.5	90	101.667	87	173	164.667	123.667	115.667	122	218.833	6.94819	7.16898	7.03496	6.77605	7.01275	7.01813	6.33267	6.26086	7.13429	6.6614	6.43695	6.90578	P	P	P	P	A	P	P	P	P	P	P	P	hsa_circRNA_101580	hsa_circ_0005203	exonic	chr15	+	71433787	71447271	uc002atb.1	THSD4	TCAACACAGGAAGGACTTGAACGCAACTCCCAATTGCAGAAAATTG
ASCRP001931	97.5	79	80.5	83.1667	84.6667	86	134.5	146	119	106.5	113.333	200	6.76241	6.84209	6.66242	6.63287	6.63837	6.95835	6.0304	6.09577	7.0469	6.52371	6.24836	6.74057	M	P	P	P	P	P	P	P	P	P	P	P	hsa_circRNA_101581	hsa_circ_0036117	exonic	chr15	+	71433787	71549054	uc002atb.1	THSD4	TTTGCAGAAGGACTTGAACGCAACTCCCAATTGCAGAAAATTGGCA
ASCRP001934	480	301.667	291	329.833	214.5	244.833	490	486	242.333	265.5	217	315	9.50474	9.33079	8.67376	9.07211	8.30941	8.78863	7.69494	7.84856	8.32246	8.21794	7.57102	7.44444	P	P	P	P	P	P	P	P	P	P	P	P	hsa_circRNA_101584	hsa_circ_0036200	exonic	chr15	-	72509749	72511451	uc002atv.2	PKM2	AACTCATGAGGACCTCAGCAGCCATGTCGAAGCCCCATAGTGAAGC
ASCRP001936	79.1667	75	73	68.6667	85.1667	61.1667	176.5	231.667	95.6667	108.5	117	232.333	6.45295	6.72393	6.49471	6.29259	6.68712	6.31932	6.35995	6.73072	6.51535	6.50737	6.29442	6.96766	P	P	P	P	A	A	P	P	P	P	P	P	hsa_circRNA_101586	hsa_circ_0036231	exonic	chr15	+	72855734	72862648	uc002aut.4	ARIH1	CCACATGGATCTGCCTGTGCAATCGACTGTTAAAGTGGTGTCCTGC
ASCRP001939	92.8333	138.333	65	267.667	132.333	81.8333	1539.5	3871.33	110	152	260.167	349.333	6.7458	7.99471	6.27519	8.73962	7.51135	6.90067	9.51912	11.588	6.86191	7.24245	7.91468	7.58424	P	P	A	P	P	P	P	P	P	P	P	P	hsa_circRNA_101589	hsa_circ_0004033	exonic	chr15	-	73052747	73067438	uc002avg.4	ADPGK	TAGAGTATCAAGCAGAGTCAATGCATGTGTTGATGTGGTGCTCTCA
ASCRP001940	139.333	112	175	133.5	132.5	115	303.667	263.5	148.667	221	191.167	199.667	7.49724	7.56988	7.91443	7.46508	7.5186	7.57307	7.04738	6.91653	7.46388	7.92463	7.32356	6.72652	P	P	P	P	P	P	P	P	P	P	P	P	hsa_circRNA_101590	hsa_circ_0036254	exonic	chr15	+	73991926	73996813	uc002avu.1	CD276	ACCATCACAGGCAGGGGCAGCCTTCCACCACGGGGAGCCCAGCTGT
ASCRP001941	127	108.833	116.667	158.833	109.5	93.1667	959.5	1224.83	116.667	127.667	193.833	325.833	7.35131	7.51956	7.2847	7.7952	7.18906	7.18084	8.68984	9.2184	6.98361	6.89085	7.35701	7.48559	P	P	P	P	P	P	P	P	P	P	A	P	hsa_circRNA_101591	hsa_circ_0036282	exonic	chr15	+	74865202	74865545	uc002aye.3	ARID3B	TTTATGCAGAAGAGGGAATGGTGGTTTGGCCTGGAGTGATGATGCA
ASCRP001942	1372	564.167	517	1173.83	1124.67	710	2577.5	1268	749	531	1125.67	3668.5	10.9254	10.3142	9.41501	10.9751	10.5573	10.1174	10.4413	9.27884	10.1282	9.4158	10.4799	10.3569	P	P	P	P	P	P	A	P	P	P	P	A	hsa_circRNA_101592	hsa_circ_0036287	exonic	chr15	+	74911537	74912566	uc002ayj.4	CLK3	TCTTGTAGCAGCGCCTCCTCGATGCATCACTGTAAGCGATACCGCT
ASCRP001943	66.8333	57.6667	59	57.3333	61.1667	54.6667	110.833	124.833	80.6667	86.6667	94.1667	138	6.15934	6.10129	6.09811	6.00919	6.0636	5.99453	5.84067	5.8953	6.03375	6.02723	5.76871	6.14734	A	A	A	P	A	A	P	P	A	P	A	P	hsa_circRNA_101593	hsa_circ_0004401	exonic	chr15	-	74948073	74948409	uc002aym.3	EDC3	TTCTGCACGGGGTCATCTAGTAGCAGGCACCCAAATCAGGCAACTC
ASCRP001945	105.5	68	94.6667	71.6667	78.8333	71.6667	766	234	109.167	125.833	143	315.167	6.94719	6.42584	6.9095	6.32574	6.50703	6.6841	8.33991	6.72964	6.83569	6.85338	6.74466	7.43229	P	A	P	P	P	P	P	A	P	P	P	P	hsa_circRNA_101595	hsa_circ_0000633	exonic	chr15	-	74963795	74967483	uc002aym.3	EDC3	CACAACTCCTTGGTCTCACGTGTGAAACATGGCTACAGATTGGCTG
ASCRP001946	80.5	72.1667	86	64.3333	78.6667	66.3333	168.333	181.833	103.833	117.333	127.667	182	6.4634	6.6218	6.74719	6.18134	6.58647	6.54009	6.30114	6.37617	6.72416	6.71254	6.49102	6.59794	P	P	A	P	P	A	P	P	P	P	P	P	hsa_circRNA_101596	hsa_circ_0006810	exonic	chr15	-	75215988	75221573	uc002azi.4	COX5A	AACCGCATGGCTATCCAGTCAGTTCGCTGCTATTCCCATGGGTCAC
ASCRP001947	102	61.3333	69.5	78	84.5	63.5	119.5	166.833	88.3333	90.3333	99.6667	142.167	6.89218	6.22392	6.40975	6.52952	6.68117	6.40937	5.9072	6.28439	6.30604	6.10348	5.94438	6.18672	P	A	A	P	A	A	P	A	P	P	A	P	hsa_circRNA_101597	hsa_circ_0036347	exonic	chr15	-	75693070	75705386	uc002bai.3	SIN3A	CTGTAAAGAGCATCGACACCCCAGGAGTGATTAGTCGTGTGTCCCA
ASCRP001951	98.5	100	128	110	101.833	92.6667	207.333	176	106.833	118	133.667	153	6.86881	7.33968	7.43262	7.13253	7.0005	7.14839	6.56837	6.36599	6.77135	6.74824	6.57077	6.28705	P	P	P	P	P	P	P	P	P	P	P	P	hsa_circRNA_101602	hsa_circ_0036399	exonic	chr15	-	76566752	76580286	uc002bbt.2	ETFA	AAATAGTAGCACCAAACCTTTTGCCCAGAGTAGCAGCCAAACTTGA
ASCRP001953	69.6667	54.3333	62.1667	62.3333	65.6667	58.6667	133.5	139.833	88.6667	102.167	119.167	141.667	6.17625	5.97229	6.18648	6.0998	6.17322	6.16713	6.01303	6.03482	6.29804	6.42769	6.348	6.15909	A	A	A	P	P	A	P	P	P	P	P	P	hsa_circRNA_101604	hsa_circ_0000638	exonic	chr15	-	76566752	76588078	uc002bbt.2	ETFA	GAAAAATAGTAGCACCAGCCTCATTGCTACGATTTCAGAGTACCCT
ASCRP001954	52	43.1667	44	54.3333	55.1667	47.3333	83.3333	137.333	70.1667	73	107.667	193.667	5.69401	5.45438	5.50187	5.89839	5.83541	5.65163	5.49373	5.98377	5.53493	5.52138	6.08421	6.67066	A	A	A	P	A	A	A	P	A	A	P	P	hsa_circRNA_101605	hsa_circ_0005036	exonic	chr15	-	76576097	76585041	uc002bbt.2	ETFA	TTATATGACTTGGCAGATCAACTACATGCTGCAGGTGGCACAAGAT
ASCRP001955	57.6667	49.1667	44	64.3333	60.6667	55.6667	95.5	142.333	75.3333	80.3333	111.833	201.5	5.81045	5.675	5.5362	6.15802	6.00327	5.89658	5.65867	6.06119	5.7641	5.71986	6.17072	6.736	A	A	A	P	A	A	P	P	A	A	P	M	hsa_circRNA_101606	hsa_circ_0002226	exonic	chr15	-	76576097	76588078	uc002bbt.2	ETFA	TTATATGACTTGGCAGATCAACTACATGCTGCAGGCCTCATTGCTA
ASCRP001956	62.1667	47.5	49.3333	63.1667	60.1667	53.1667	96.5	131.5	76.3333	83	101.5	158.667	5.94683	5.61682	5.76114	6.16559	6.03666	6.09021	5.69996	5.96665	5.86422	5.90212	5.97212	6.35844	A	A	A	P	A	A	P	P	A	A	P	P	hsa_circRNA_101607	hsa_circ_0000639	exonic	chr15	-	76580186	76585041	uc002bbt.2	ETFA	ATTTATGCAGGTGGCACAAGATCTCTGTAAAGTAGCAGGCATAGCA
ASCRP001957	57	46.8333	48.1667	63	57.8333	52.3333	362.833	130.833	221.833	169	208.167	254.333	5.80828	5.57618	5.72882	6.14983	5.96173	5.93146	7.27557	5.96185	8.16169	7.46201	7.48044	7.13747	A	A	A	P	A	A	P	P	P	P	P	P	hsa_circRNA_101608	hsa_circ_0036408	exonic	chr15	-	76580186	76588078	uc002bbt.2	ETFA	ATTTATGCAGGCCTCATTGCTACGATTTCAGAGTACCCTGGTAATA
ASCRP001959	79.3333	59.5	61	80.1667	75.6667	58	274.333	132.833	180.667	138.667	147.333	179	6.4699	6.16522	6.17567	6.57924	6.43547	6.14809	6.91095	5.95644	7.80167	7.08589	6.80777	6.54829	P	A	A	P	P	A	P	P	P	P	P	P	hsa_circRNA_101610	hsa_circ_0003620	exonic	chr15	-	76584771	76588078	uc002bbt.2	ETFA	AGCATCTGCCTTCGGAAAGGCCTCATTGCTACGATTTCAGAGTACC
ASCRP001964	97	102.167	135	99.3333	121.667	93.6667	249	197.667	136.5	143.5	140.333	206.167	6.82076	7.36263	7.46584	6.90832	7.33633	7.19266	6.69578	6.41749	7.28612	7.12018	6.67014	6.7844	P	P	P	P	P	P	P	P	P	P	P	P	hsa_circRNA_101615	hsa_circ_0036444	exonic	chr15	-	78398080	78398276	uc002bdb.1	CIB2	ACTTCCTCAGACTTCAACACTGACAACTTCATCTGCAAGGAGGACC
ASCRP001966	57.6667	52.1667	46.3333	57.6667	55.3333	52.6667	106.333	131	76.3333	74.6667	95.8333	132.333	5.78966	5.8336	5.60666	6.00688	5.84238	5.85973	5.76805	5.95427	5.8252	5.58202	5.81944	6.06301	A	A	A	P	A	A	P	P	A	A	A	P	hsa_circRNA_101617	hsa_circ_0000642	exonic	chr15	+	80390757	80415142	uc002bfe.2	ZFAND6	GATGTGCAGGGAATGAATCTGAAGTCTGCTGCAGTAAAACACAGAA
ASCRP001967	102.167	93.3333	66.8333	136.667	114.833	72	638.333	1228.67	102.333	119.333	184.5	394.667	6.90869	7.15425	6.34904	7.52703	7.23876	6.70556	8.06595	9.21722	6.72154	6.73186	7.26063	7.76106	P	P	A	P	P	P	P	P	P	P	P	P	hsa_circRNA_101618	hsa_circ_0000643	exonic	chr15	+	80412669	80415142	uc002bfe.2	ZFAND6	GATGTGCAGGGTGTGCAACTGAGGAACATGGCTCAAGAAACTAATC
ASCRP001979	101.667	77.3333	84	79.3333	98	79.8333	286.833	343	114.667	145.167	140.5	165.333	6.93874	6.84151	6.75026	6.55472	6.9351	6.89201	6.98356	7.3052	6.95662	7.18064	6.71162	6.42678	P	P	P	P	P	P	P	P	P	P	P	P	hsa_circRNA_101630	hsa_circ_0036627	exonic	chr15	+	85656607	85669605	uc002blh.3	PDE8A	AGAATATTTTTCTCAGTTTCCAGCCAGAGACGACACTCTTCCATGG
ASCRP001980	65.3333	57	51.3333	60.6667	72.8333	54	147	153.667	82.6667	87.1667	110.667	132.833	6.07811	6.06112	5.8337	6.08514	6.38673	5.96654	6.13911	6.17446	6.0554	6.03729	6.14148	6.10144	A	A	A	P	P	A	P	P	A	P	P	P	hsa_circRNA_101631	hsa_circ_0003856	exonic	chr15	+	85657103	85658718	uc002blh.3	PDE8A	TCAACAAAAAGTAATCAATATTATCAATGCTGCCCAGGAAAGTAGT
ASCRP001981	73.6667	63.6667	53.3333	61	66.6667	57	135.833	150.333	80.5	88.5	106.333	125.833	6.26918	6.31582	5.79576	6.10137	6.19252	6.05674	6.05164	6.15201	5.9345	6.06075	6.10366	5.99438	A	A	A	P	P	A	P	P	A	P	P	P	hsa_circRNA_101632	hsa_circ_0005889	exonic	chr15	+	85657103	85661070	uc002blh.3	PDE8A	GAGAGGATAAAGGTAATCAATATTATCAATGCTGCCCAGGAAAGTA
ASCRP001982	70.5	64.5	57.6667	69.5	72.5	60	138	166.333	81.1667	90.3333	115.333	146	6.20317	6.42371	6.03673	6.32327	6.36757	6.18047	6.05746	6.2673	6.01413	6.10514	6.22908	6.22251	A	A	A	P	P	A	P	P	A	P	M	P	hsa_circRNA_101633	hsa_circ_0036629	exonic	chr15	+	85657103	85664245	uc002blh.3	PDE8A	AAACATGGAGAGGTAATCAATATTATCAATGCTGCCCAGGAAAGTA
ASCRP001983	103.667	79	98.3333	84.3333	91.6667	93.8333	161	166.833	124.333	148.333	131.833	160.333	6.96368	6.8307	7.00905	6.67488	6.86769	7.21779	6.25147	6.28565	7.10275	7.22192	6.58543	6.37381	P	P	A	P	P	P	P	P	P	P	P	P	hsa_circRNA_101634	hsa_circ_0036663	exonic	chr15	-	88669501	88670457	uc002bme.2	NTRK3	AAATTTGGAATGAAGGTTGACGAAGTGAGTCCCACACCTCCTATCA
ASCRP001986	58.8333	44.6667	40.8333	57.8333	59.8333	53.3333	118	147	71.6667	71.3333	127.333	184.833	5.85626	5.52566	5.42486	5.9611	6.01123	5.95853	5.88139	6.06593	5.68368	5.38598	6.5289	6.62031	A	A	A	P	A	A	P	M	A	A	M	P	hsa_circRNA_101637	hsa_circ_0007099	exonic	chr15	+	89656955	89659752	uc002bnj.2	ABHD2	TGACCAAAGACTTTTAGGTTTGTTTGAATAAGAGATCTGACCTGAC
ASCRP001987	52.5	46.1667	43.8333	52.5	55	48.8333	94.3333	114.333	67.6667	68.8333	113	136.333	5.61096	5.57319	5.56063	5.81204	5.82438	5.69219	5.65332	5.78286	5.47533	5.36155	6.22458	6.12174	A	A	A	A	A	A	P	P	A	A	P	P	hsa_circRNA_101638	hsa_circ_0036683	exonic	chr15	+	89656955	89698765	uc002bnj.2	ABHD2	TTCACCTATGCTTTTAGGTTTGTTTGAATAAGAGATCTGACCTGAC
ASCRP001988	151	111.667	131.833	112.167	105.333	101.167	248.667	333.833	133.833	155.833	176.167	274.333	7.66941	7.54726	7.49014	7.1527	7.07754	7.34032	6.8128	7.25594	7.26642	7.30847	7.16983	7.2457	P	P	P	A	P	P	P	P	P	P	P	P	hsa_circRNA_101639	hsa_circ_0036688	exonic	chr15	+	89698597	89698765	uc002bnj.2	ABHD2	ATGTTCACCTATGATGATATCACCATGGTCATCTGCCCTGGAATTG
ASCRP001991	124.833	150.167	134.833	95.6667	190.5	99.5	304.167	291.667	129.333	189.333	186.667	167.833	7.32706	8.13735	7.54108	6.88161	8.11391	7.27159	7.05271	7.06528	7.252	7.66876	7.26816	6.45649	P	P	A	P	P	A	P	P	P	P	P	P	hsa_circRNA_101642	hsa_circ_0002080	exonic	chr15	-	90431752	90432372	uc002boq.4	AP3S2	ATCTTGGACCTCATCCAGCCAGAAGAAATTCAACAGCAGATTGTTC
ASCRP001992	160.333	138	131.167	236.5	131.5	105.667	687.667	859.333	111.667	129.833	174.833	260.333	7.77975	7.96831	7.46322	8.57463	7.47371	7.40987	8.18252	8.68615	6.89012	6.94408	7.15069	7.1788	P	P	P	P	P	P	P	P	P	P	P	P	hsa_circRNA_101643	hsa_circ_0036750	exonic	chr15	-	90446447	90454051	uc002bos.4	C15orf38-AP3S2	CGAGGAGTGGGGGAAATGGTGTCCTGCTGGAGGGAGAACTGATCGA
ASCRP001993	162.167	105.167	182.333	153.833	151.333	136	695.833	517.5	271.667	273	364.667	641.667	7.82854	7.43024	7.96274	7.75781	7.71373	7.8474	8.1977	7.95656	8.4996	8.26302	8.52668	8.39896	M	P	P	M	P	P	P	P	P	P	P	P	hsa_circRNA_101644	hsa_circ_0036751	exonic	chr15	-	90451511	90454051	uc002bos.4	C15orf38-AP3S2	AACACGGGCTTCCTCATGTCGTCCTACAGGGAAATGGTGTCCTGCT
ASCRP001994	56.3333	50.6667	81.6667	49.6667	59.5	52.6667	108.333	144.5	79.3333	78.6667	98.5	159.5	5.76642	5.68653	6.68874	5.7084	6.00044	5.98951	5.79571	6.07379	5.99628	5.70934	5.91322	6.36617	A	A	P	A	A	A	P	P	A	A	A	P	hsa_circRNA_101645	hsa_circ_0036763	exonic	chr15	+	90760670	90763123	uc002boy.3	SEMA4B	CCCATGTGTACCTACATCGCTCTGAAGAGCGGCCATTCCTCAGATT
ASCRP001996	59.8333	51.1667	55	59.6667	59.1667	64.1667	118.5	188.333	89.3333	99.3333	109.833	144.167	5.88094	5.77228	6.04493	6.07696	6.03754	6.38201	5.89663	6.42604	6.37361	6.35466	6.18236	6.18851	A	A	A	P	A	P	P	A	P	P	P	P	hsa_circRNA_101647	hsa_circ_0036768	exonic	chr15	+	90763024	90764997	uc002boy.3	SEMA4B	CATCTGCAAGCGCGACTGTCAAAACTACATCAAGATCCTCCTGCCG
ASCRP002000	151.5	129.667	110	182.667	167.833	143.5	326	250	125	148.5	151.333	173.667	7.6842	7.86021	7.2047	8.0513	7.89061	7.94116	7.13494	6.85252	7.13625	7.22468	6.84631	6.48972	P	P	P	P	P	P	P	P	P	P	P	P	hsa_circRNA_101651	hsa_circ_0036941	exonic	chr15	-	91553030	91557663	uc002bqp.1	VPS33B	ATCTATGGAGATTGTGCTTCTTGGTCAGACCCCGCATCAAGAATAT
ASCRP002003	60.5	54.6667	49.8333	82	58	49.8333	111.333	166.333	83.5	84.1667	105	114.333	5.94425	6.00972	5.79242	6.61343	5.93856	5.72582	5.83277	6.28608	6.13365	5.95951	6.0577	5.84192	A	A	A	P	A	A	P	P	A	P	A	P	hsa_circRNA_101655	hsa_circ_0000660	exonic	chr15	+	94899365	94945248	uc002btl.3	MCTP2	TAAGAAGTACAATAGCATTCGCGTCCTCTTTGATACGCAACCTACG
ASCRP002004	133	112.333	226.167	102	163	128.667	325.333	366.5	219.667	258.833	299.833	276	7.43199	7.55402	8.29968	6.96066	7.86276	7.78553	7.13069	7.40267	8.1386	8.18495	8.16354	7.27083	P	P	P	A	P	P	P	P	A	M	P	P	hsa_circRNA_101656	hsa_circ_0004200	exonic	chr15	-	96826060	96834012	uc002bto.1	AK000872	CCTTTCTTTGGTCCCAGTTCCTCTGGGAATCGTCCTGTATGCAACA
ASCRP002009	125.5	101.833	121.333	82.1667	73.8333	84.6667	215.667	205.333	109.5	121.333	114.167	203.333	7.28005	7.33189	7.33002	6.64115	6.43647	6.90174	6.6068	6.55203	6.87339	6.76519	6.26529	6.76276	P	P	P	P	P	M	P	P	A	M	P	A	hsa_circRNA_101661	hsa_circ_0037078	exonic	chr15	+	101550654	101551042	uc002bwr.3	LRRK1	CTGCCCTTTGGCTACTTGAAATTGACATTTCCAGCAACAAGTTGTC
ASCRP002012	75.5	62.1667	76.5	69.8333	78	70	157.5	171.667	91	117.167	127	151.5	6.377	6.32445	6.58003	6.3357	6.50138	6.63395	6.21004	6.31876	6.39074	6.69758	6.49803	6.28514	P	A	P	P	P	P	P	P	P	P	P	P	hsa_circRNA_101665	hsa_circ_0037127	exonic	chr16	-	142593	143323	uc002cfp.2	NPRL3	TGTGCAGGAGGTTTTCCAGCTTGCAGCTCATCTGGTGTACTGGGGC
ASCRP002017	721.5	608	672	590.833	552.333	912	879.333	782.667	827.833	765.333	548.167	928.333	10.0751	10.4357	9.73168	10.029	9.65937	10.3648	8.55486	8.5362	10.3194	10.1184	9.19884	8.89259	P	P	P	P	P	P	P	P	P	M	P	P	hsa_circRNA_101670	hsa_circ_0037160	exonic	chr16	-	359972	364683	uc002cgp.2	AXIN1	AGGTCAATGGGCGGGTGCCCCTACCTCACATTCCCGTATGGATCCT
ASCRP002019	93.5	71.1667	113.333	73.6667	96.1667	70.8333	161	134	118.5	137.5	126.667	115.167	6.74341	6.57165	7.27929	6.39657	6.88156	6.62824	6.22498	5.97409	6.99245	7.06432	6.47927	5.83484	P	A	P	P	P	P	P	P	P	P	P	P	hsa_circRNA_101672	hsa_circ_0037207	exonic	chr16	+	667207	668260	uc002chq.3	RAB40C	TACTCCAGGGGCGCTCAGGGATCGACTACAAGACCACCACCATCCT
ASCRP002021	102.667	72	109.333	96	95.1667	87.3333	460.667	597.167	125.667	176.333	205.667	306.5	6.91536	6.65947	7.1995	6.87782	6.89684	7.02102	7.53625	8.14061	7.15709	7.52171	7.44956	7.40373	P	P	P	P	P	P	M	P	P	P	P	P	hsa_circRNA_101674	hsa_circ_0007701	exonic	chr16	-	1004356	1004666	uc021tad.1	LMF1	TTAATGTGGGCCATGTCTGTCGTGGCATTCCTGGTGGCTTTCCATC
ASCRP002022	123.833	92	96.8333	103.667	102.5	93	150.833	184.333	112.667	116	124.333	202.5	7.29928	7.13869	6.95434	6.99383	7.01813	7.17058	6.15831	6.40356	6.88212	6.69477	6.43514	6.77368	P	P	P	M	P	P	P	P	P	A	P	P	hsa_circRNA_101675	hsa_circ_0000665	exonic	chr16	+	1364020	1370518	uc002clc.2	UBE2I	CGATTTACTGGGACTTTGAACATGTCGGGGATCGCCCTCAGCAGAC
ASCRP002024	90.1667	87.1667	86.5	78.1667	70	65.3333	123.667	121.167	77	84.3333	93.3333	118	6.68482	7.01481	6.79519	6.49626	6.31888	6.42341	5.93495	5.87834	5.86495	5.89352	5.7598	5.86496	P	P	P	P	P	P	P	P	A	A	A	M	hsa_circRNA_101677	hsa_circ_0008480	exonic	chr16	+	1774557	1779579	uc002cml.3	MAPK8IP3	CGGGGCGGAGAAATTCATTGAGTTTGAAGATGCTCTGGAACAAGAG
ASCRP002025	77.5	68.5	92.8333	74.1667	82.6667	75.5	274.667	226.333	119.333	140.833	142.667	138.833	6.41955	6.49258	6.91019	6.43283	6.63568	6.7376	6.91872	6.67688	7.03567	7.11281	6.74725	6.14818	P	A	P	P	P	P	P	P	P	P	P	M	hsa_circRNA_101678	hsa_circ_0037353	exonic	chr16	-	1872300	1873038	uc002cmz.3	HAGH	ACCACCACTGGTCCAGCCCTGCTGGGAGTTTTCTGCCACACAGATT
ASCRP002029	91	58	61.6667	67.3333	67	59.6667	310.833	333.333	80.6667	98	115.5	154	6.71306	6.12339	6.21071	6.23063	6.21147	6.26752	7.0785	7.26271	6.05561	6.36823	6.25576	6.30571	P	A	A	P	P	A	P	M	A	P	P	P	hsa_circRNA_101682	hsa_circ_0037409	exonic	chr16	+	2106196	2108874	uc002con.3	TSC2	ATCATTTTACCAGGATGATCTGTCTGCTGTGCGTCCGGACCGCGTC
ASCRP002030	87.8333	69.3333	74.6667	80.5	81.1667	66.1667	156.333	173.5	98.3333	115.667	122	157.833	6.64562	6.58111	6.52213	6.57448	6.56405	6.53581	6.21166	6.32637	6.55088	6.70808	6.40201	6.36244	A	P	A	P	P	P	P	P	M	P	P	P	hsa_circRNA_101683	hsa_circ_0007275	exonic	chr16	-	2312278	2313288	uc002cpt.3	RNPS1	AAGCACATGGATGGAGGTCTCGGTCCAGCTCGACTTCCAGCTCAGG
ASCRP002031	105	87.6667	86.6667	112.667	89.1667	75.8333	337.5	487.833	102.833	130.5	154.167	269.5	6.96499	7.01423	6.75492	7.13154	6.73946	6.76366	7.17372	7.86179	6.66926	6.931	6.89773	7.22339	P	P	P	M	P	P	P	P	P	P	P	P	hsa_circRNA_101684	hsa_circ_0037511	exonic	chr16	-	2312278	2314761	uc002cpt.3	RNPS1	ATGGATGGAGGCTGCTCTTTGGCGTAAATTGCAATCGATTAGGGAT
ASCRP002035	117.167	89.1667	179.167	115.167	120.333	103	254	237	156.333	187.5	183.167	179.333	7.19716	7.06567	7.93216	7.23054	7.33315	7.35281	6.82589	6.76086	7.54326	7.65572	7.22106	6.54213	P	P	P	P	P	P	P	P	P	P	P	P	hsa_circRNA_101688	hsa_circ_0005466	exonic	chr16	+	2607703	2616454	uc002cqs.3	PDPK1	AGCAAACAAGTATGACGCCGTGCCCATCCAGTCCAGCGTGGTGTTA
ASCRP002036	66.5	62.6667	52	82.5	66	49.1667	378.833	505.167	89.6667	87.1667	120.667	223	6.1141	6.23756	5.87216	6.5949	6.24524	5.76104	7.3214	7.91212	6.2095	6.02013	6.39456	6.93587	A	A	A	P	P	A	P	A	A	P	P	P	hsa_circRNA_101689	hsa_circ_0007763	exonic	chr16	+	3526221	3529600	uc002cvh.4	NAA60	ACCAAAATACATAAAGAGGTGTGAATGACAGAGGTGGTGCCATCCA
ASCRP002038	79.3333	52.3333	41.3333	70	66.3333	52.6667	136.833	200.667	68.8333	70.5	128	660.333	6.44984	5.79344	5.44871	6.34353	6.21213	5.90621	6.06724	6.52044	5.52487	5.38283	6.50833	8.4258	P	A	A	P	P	A	P	P	A	A	P	P	hsa_circRNA_101691	hsa_circ_0007637	exonic	chr16	-	3900297	3901010	uc002cvv.3	CREBBP	CATGGCCAAGATTTTGGATCATTGTTTGACTTGGAAAATGATCTTC
ASCRP002039	131	99.6667	116	123.833	112.833	97.5	426.667	386.667	131	166.5	193.667	251.833	7.38407	7.31422	7.28864	7.36216	7.18682	7.25448	7.49822	7.48519	7.24334	7.42055	7.34497	7.13386	P	P	P	P	M	P	P	P	P	P	P	P	hsa_circRNA_101692	hsa_circ_0005692	exonic	chr16	+	4382215	4383520	uc002cwc.1	GLIS2	CAGTGCCTCGGTTCCTGCGTGAAGACCAGCTGGGAGCCCACTGCCT
ASCRP002040	160.5	159.333	172	137	126.667	118.333	244.333	186.667	112.333	128.333	166.5	169.333	7.75208	8.21298	7.867	7.52165	7.42747	7.60609	6.78057	6.41671	6.90358	6.88663	7.05629	6.45895	P	P	P	P	P	P	P	P	P	P	P	P	hsa_circRNA_101693	hsa_circ_0007788	exonic	chr16	-	4516153	4519466	uc002cwm.3	NMRAL1	AAAGCCCCAGACGGAAAGAGCTACTTGCTGAGTGCCCAGGGTGGCT
ASCRP002042	680.333	393.5	680	585.667	1636.33	1421.33	1066.17	883.667	392.667	549	825.167	15166	9.98181	9.69289	9.74965	10.0048	11.026	11.0361	8.86066	8.73533	9.03124	9.45734	9.87173	12.0432	M	P	P	P	P	P	P	P	P	P	P	P	hsa_circRNA_101695	hsa_circ_0007146	exonic	chr16	-	5077135	5078186	uc010buc.3	NAGPA	AGAACTCTCCTTTTTCACCAGCCAGGACAACATGTGGCGCTGTCCC
ASCRP002044	106.667	115	130.833	122.5	126.333	104.167	406.167	166.5	140.167	148.333	142.833	185.5	7.0428	7.59754	7.46877	7.30904	7.40551	7.3859	7.42055	6.27474	7.33821	7.2252	6.76173	6.61607	P	P	P	P	P	P	P	P	P	P	P	P	hsa_circRNA_101697	hsa_circ_0037794	exonic	chr16	+	8839857	8851663	uc002czc.4	ABAT	TGAAACTCATCCAACAGCCTCAAAATGCGGATCCAGACACATTAGT
ASCRP002045	656.833	308	443	329	370.833	306.333	603.833	699.167	355	436.833	463.667	691	9.93704	9.35832	9.26471	9.06916	9.08154	9.08767	7.98377	8.3601	8.86796	9.09021	8.93485	8.48331	M	P	P	P	P	P	P	P	P	P	P	P	hsa_circRNA_101698	hsa_circ_0000669	exonic	chr16	-	8952206	8953192	uc002czh.1	CARHSP1	GACATCTTCCTGCACATCTCTGAGTCAGCCATGTCATCTGAGCCTC
ASCRP002049	72.1667	53.8333	53.6667	73.1667	70	52.5	169.5	265.5	67.5	73	101.333	119.167	6.23564	5.92711	5.85915	6.41715	6.32217	5.83202	6.30458	6.9125	5.4502	5.51917	5.98549	5.93013	A	A	A	P	P	A	P	P	A	A	P	P	hsa_circRNA_101702	hsa_circ_0007846	exonic	chr16	+	11114049	11220003	uc002dao.3	CLEC16A	TCGGTGGACAAGGTGCCAGAGATCGAGATGGTGATCATGGAGCGTA
ASCRP002051	98.8333	66.8333	84.6667	73.1667	83.6667	71.1667	319	347.667	97.1667	120	151.667	233	6.83185	6.48759	6.74877	6.40613	6.64413	6.66062	6.14694	7.33381	6.55094	6.72778	6.86899	7.00559	M	A	P	P	P	A	M	P	P	P	P	P	hsa_circRNA_101704	hsa_circ_0037858	exonic	chr16	-	11647388	11650591	uc002daz.3	LITAF	TGTGCCTGCTGGGGTAAAATGTCGGTTCCAGGACCTTACCAGGCGG
ASCRP002053	187.5	247.333	100.333	484.833	246	140.833	2039.17	4279.83	145.167	189.167	291.167	489.167	8.03581	8.97915	7.03135	9.67373	8.52012	7.89613	10.0644	11.8202	7.42984	7.66188	8.12629	8.04758	P	P	P	P	P	P	P	P	P	P	P	P	hsa_circRNA_101706	hsa_circ_0005394	exonic	chr16	-	11868091	11876244	uc002dbl.3	ZC3H7A	GAAACTGTTATGATTGCTCATTTAGAAAGTGGATGTGTGGGATAAC
ASCRP002054	17282	8728.5	11214.2	8422.5	27911	21201.5	7076.5	5533.17	4315.17	2057.33	10355.8	99127	14.2812	13.9544	13.9616	13.7095	14.5272	14.4591	12.6101	12.331	12.9093	11.8618	13.9069	15.0538	P	M	P	A	P	M	P	P	A	P	P	P	hsa_circRNA_101707	hsa_circ_0000673	exonic	chr16	-	11940357	11940700	uc010buw.2	RSL1D1	GGTTCTTGCAGATTATCTCCCTCCAAACTCTAAAGAAGGAATATAA
ASCRP002055	65.3333	55	74	59.8333	62.3333	56.5	201.667	161.833	89	106.667	117.333	133.833	6.06422	5.95099	6.54277	6.09142	6.0807	6.12693	6.5093	6.24285	6.29868	6.48835	6.32594	6.08342	A	A	P	P	A	A	P	P	P	P	P	P	hsa_circRNA_101708	hsa_circ_0006979	exonic	chr16	-	11940357	11941663	uc010buw.2	RSL1D1	GTTCTTGCAGGACCTTGCCTCATAGTATTCGATCAGATTCAGAAGA
ASCRP002058	237.667	171.167	297.167	205.5	253.667	209	838.333	1076.33	287.833	496.667	557.167	1779.83	8.43788	8.40046	8.69946	8.3159	8.57243	8.52574	8.48903	9.00362	8.58643	9.30213	9.2326	9.66271	P	P	P	P	P	P	P	P	P	P	P	P	hsa_circRNA_101711	hsa_circ_0037969	exonic	chr16	-	14680174	14721193	uc010uzc.2	PARN	ATGTGTTTTCCCCAGCATTCCATGGACTTTTTGCTATTTCAGTTTG
ASCRP002059	95.5	58.3333	57.5	63.6667	68	56.3333	158	149.667	81.5	89.3333	103.667	126.333	6.8021	6.12668	6.03383	6.19826	6.28955	6.07594	6.23104	6.12674	6.05179	6.04694	6.05007	6.02225	P	A	A	P	P	A	P	P	A	P	P	P	hsa_circRNA_101712	hsa_circ_0005627	exonic	chr16	-	14687157	14698083	uc010uzc.2	PARN	CTCTGCCTGCGAAGGAGCGATATATAGTTATCAGCAAAGTAGATGA
ASCRP002062	124.833	87.1667	111.667	75.6667	156.667	192.5	134	136.667	88	94	125.833	5423.33	7.32175	6.93837	7.10218	6.46283	7.77369	8.41018	6.02029	5.9911	6.3199	6.21329	6.4472	10.7978	P	P	P	P	P	P	P	P	P	P	P	A	hsa_circRNA_101715	hsa_circ_0009065	exonic	chr16	+	14738130	14738466	uc002dco.3	BFAR	TTCTCCTCAGATTAATGATGTTTTGCAGCAGTTTTCTACGTCTGAA
ASCRP002064	115.167	81.5	122.833	87.8333	92.6667	86.1667	558.333	219.5	136	176.333	164.167	185.167	7.08998	6.86006	7.36748	6.70252	6.82095	6.96034	7.88016	6.63901	7.31129	7.54385	7.02193	6.5992	M	P	P	P	P	M	P	M	P	P	M	A	hsa_circRNA_101717	hsa_circ_0000676	exonic	chr16	+	16101672	16110478	uc010bvi.3	ABCC1	GGAAACCATCCACGACCCTGACTGGAATGTCACGTGGAATACCAGC
ASCRP002065	173.833	149	224.833	156.333	153.167	138.167	837.667	396.333	199.333	274.667	254.667	292.333	7.91068	8.11915	8.28129	7.77598	7.7269	7.90263	8.48779	7.51341	7.97464	8.27658	7.86711	7.3359	P	P	P	P	P	P	P	P	P	P	P	P	hsa_circRNA_101718	hsa_circ_0038082	exonic	chr16	+	16103632	16110478	uc002del.4	ABCC1	ACCATCCACGACCCTGCCTTGGGATTTTTGCTGTGGATCGTCTGCT
ASCRP002066	56.3333	47.3333	51.3333	61.5	54	51.6667	127.667	132.333	79.1667	85.6667	102.667	111.5	5.74352	5.52527	5.79218	6.10777	5.79792	5.84255	5.95459	5.9351	5.93592	5.99309	5.97322	5.82208	A	A	A	P	A	A	P	P	A	P	A	A	hsa_circRNA_101719	hsa_circ_0038090	exonic	chr16	+	16110352	16127027	uc002del.4	ABCC1	GGATCACAGGGATGCCCAGGTGGACCTGTTTCGTGACATCACTTTC
ASCRP002067	822.667	820.167	930.833	418.833	299	500	1279	1657.17	511.667	556.5	419.167	436.667	10.3024	10.8408	10.3095	9.47162	8.79913	9.6731	9.19074	9.77964	9.49381	9.48043	8.73856	7.87636	M	P	P	M	P	P	P	P	P	P	P	P	hsa_circRNA_101720	hsa_circ_0002078	exonic	chr16	+	16126965	16130460	uc002del.4	ABCC1	AGAAGGAATGCGCCAAGACTAGGAAAATCCCTGCCCAGAGTCCAGC
ASCRP002068	912.333	786.5	1135.17	548.167	576.833	693.5	1855.83	2265	695.5	822.667	748.167	1052.5	10.4494	10.7689	10.7213	9.88621	9.70889	10.0697	9.87187	10.4062	10.0132	10.262	9.67961	9.04219	P	A	P	M	P	P	P	P	P	P	P	P	hsa_circRNA_101721	hsa_circ_0038095	exonic	chr16	+	16126965	16150152	uc002del.4	ABCC1	TTCACCTGGGTCTGCACGCCCTTTCTGAATCCCTGCCCAGAGTCCA
ASCRP002069	1772	922.5	1291.5	732.833	1041.5	1080	2151.5	1742.5	844	951.833	1049.17	2973.17	11.2951	11.0189	10.9793	10.3925	10.4762	10.6444	10.1958	9.87996	10.3695	10.5357	10.3696	10.1364	P	P	P	P	P	P	P	P	P	M	P	P	hsa_circRNA_101722	hsa_circ_0038111	exonic	chr16	+	16146580	16150152	uc021tdq.1	ABCC1	GCCCTTTCTGAATCTGGGCCCTTCCGTCCTGGCTGGAGTGGCGGTG
ASCRP002071	101.667	79.6667	88.6667	92.1667	68.6667	65.3333	158.667	152.167	80.8333	95	106.333	114.333	6.92248	6.90647	6.81302	6.8307	6.31285	6.49838	6.23072	6.1623	6.09099	6.2681	6.03655	5.87529	P	M	A	P	P	A	P	P	P	P	P	P	hsa_circRNA_101724	hsa_circ_0008120	exonic	chr16	+	16180680	16184445	uc002del.4	ABCC1	ACAGAGCAGGAGCAGGATGCAGAGGAGAACGGGCGTGAACCTGTCT
ASCRP002072	3405.67	1981.67	3294	2827.67	3636.67	2977.17	5025.67	4078.5	2844.67	3436.17	3155.33	7745.67	12.1157	12.0691	12.2649	12.1685	11.9265	11.8569	11.9507	11.7105	12.2091	12.7242	12.1746	11.1388	P	P	P	P	P	P	P	M	P	P	A	M	hsa_circRNA_101725	hsa_circ_0008255	exonic	chr16	+	16200594	16205439	uc002del.4	ABCC1	ATTTCACAAGACAGCTCAGCAGCTCCTCCTCCTATAGTGGGGACAT
ASCRP002074	93.8333	79.1667	88.5	92.6667	68.3333	74.6667	491.333	714.167	95	107.833	136	209.333	6.73641	6.84103	6.81443	6.74919	6.26578	6.72115	7.70037	8.38669	6.47473	6.52025	6.63761	6.82073	P	P	P	M	P	P	P	P	P	P	P	P	hsa_circRNA_101727	hsa_circ_0000679	exonic	chr16	+	16218645	16219768	uc002del.4	ABCC1	TATTCAGAGACTGAGAAGGAGGTGGCTGGCCGTGCGGCTGGAGTGT
ASCRP002075	669.167	416.833	448.333	292.167	279.167	260.167	1018.67	1245.17	410.167	410.667	346.167	1380.5	9.96386	9.81601	9.27778	8.86886	8.72038	8.89762	8.78557	9.24618	9.12649	8.98129	8.43007	9.35472	P	P	P	P	P	P	P	P	P	M	P	A	hsa_circRNA_101728	hsa_circ_0006735	exonic	chr16	+	16345819	16346379	uc002dep.3	NOMO3	TGAAAATCGAGGATGTCCTGGGCTGCAATGTCTCACCAGTGCCTGG
ASCRP002081	141.333	132.5	191.833	137.333	143.167	123.833	390.333	204	195.167	186	214.167	237.5	7.5488	7.92258	8.03453	7.52847	7.61273	7.68068	7.35967	6.54779	7.949	7.63634	7.5287	7.02433	P	P	P	P	P	P	P	P	P	P	P	P	hsa_circRNA_101735	hsa_circ_0006976	exonic	chr16	-	18851019	18851268	uc010bwa.3	SMG1	AGTTACGCAGGCCCAAGATTCCTACCAAACTCCTCAGAATCCTGGA
ASCRP002083	65.8333	51	48.3333	71.6667	60.5	54.1667	107.667	105.833	80	83.3333	96.1667	113.333	6.08211	5.79795	5.72762	6.36585	5.9723	5.99156	5.79154	5.66766	6.07058	5.95151	5.86343	5.84742	A	A	A	P	A	A	P	P	A	A	A	P	hsa_circRNA_101737	hsa_circ_0006434	exonic	chr16	-	18852886	18856973	uc010bwa.3	SMG1	CTGCCTTACAAGCACAAAAGAGAAGAGAAAATTGCAATCATGAGGG
ASCRP002084	60.6667	55.3333	59.6667	55.3333	62	54.6667	155.667	140.833	80.1667	96	101.833	127.167	5.9386	6.00796	6.12377	5.89737	6.00466	5.9759	6.21488	6.04939	5.9204	6.29863	5.98526	6.02957	A	A	A	A	A	A	P	P	A	P	M	P	hsa_circRNA_101738	hsa_circ_0038306	exonic	chr16	-	18896411	18896988	uc010bwb.3	SMG1	CAGGTATCTGCTTGTAATGACCAGCCTGCAGTCTATTCTTGAAAAT
ASCRP002086	3986.17	3089.33	3561.67	3194.67	6567.83	6840.67	1474.17	1245.5	3378.67	1641.5	2393.33	15166.3	12.3213	12.559	12.3889	12.3362	12.6792	12.8178	9.44011	9.24322	12.5913	11.5511	11.6645	12.044	P	P	M	P	P	M	P	P	M	P	P	M	hsa_circRNA_101740	hsa_circ_0008616	exonic	chr16	+	19619499	19628130	uc002dgn.2	C16orf62	TGCCCCCGAGATCACTTTTCTCCAGAGAATGCAAATGACACGGCCA
ASCRP002087	271	226.167	246.5	251.5	245.167	355	376	392.833	310.667	264	233.667	383.167	8.66553	8.82549	8.4267	8.66238	8.52921	9.24742	7.31099	7.50335	8.6938	8.20113	7.7104	7.72246	P	P	P	P	P	P	P	P	P	P	P	P	hsa_circRNA_101741	hsa_circ_0005835	exonic	chr16	+	19627435	19628130	uc002dgn.2	C16orf62	TGCCCCCGAGGTGGGAATGGAAGTGGCCCCACATCTCAAAGAAACC
ASCRP002088	59	54.1667	48	67.3333	61.6667	52.5	229.167	209	81.3333	87.6667	95.3333	115	5.89582	5.90455	5.76311	6.24433	6.0515	5.85316	6.69738	6.57181	6.07195	6.01704	5.84292	5.8764	A	A	A	P	A	A	P	P	A	P	A	P	hsa_circRNA_101742	hsa_circ_0004683	exonic	chr16	+	19627435	19637545	uc002dgn.2	C16orf62	GTAAGAAACTAGGAAACAAGTGGGAATGGAAGTGGCCCCACATCTC
ASCRP002089	61.3333	56.3333	45.3333	66.3333	60	55.3333	193	173.667	73.6667	74.1667	95.6667	126.333	5.96265	6.01204	5.52924	6.26848	6.07144	6.13321	6.46517	6.32927	5.73174	5.54052	5.85293	6.01378	A	A	A	P	A	A	P	P	A	A	A	P	hsa_circRNA_101743	hsa_circ_0006797	exonic	chr16	+	19627435	19659204	uc002dgn.2	C16orf62	TCTTGTGCAGTTGATTCATGTGGGAATGGAAGTGGCCCCACATCTC
ASCRP002090	31654.5	20945.2	21614.8	20932.7	49042	37962.2	7712.33	8069.83	13986.8	5932.83	24178.5	131855	15.0435	14.9487	14.8102	14.8428	15.38	15.2877	12.763	12.9365	14.5225	13.7042	14.9012	15.5947	P	M	P	A	M	M	P	M	P	P	P	M	hsa_circRNA_101744	hsa_circ_0005699	exonic	chr16	+	19627435	19663412	uc002dgn.2	C16orf62	CTCTCCCAAGGTGGGAATGGAAGTGGCCCCACATCTCAAAGAAACC
ASCRP002092	133	107	122.5	128.833	120.667	132	295.333	275	138.5	146	150.5	209.333	7.40721	7.45887	7.38052	7.42975	7.33494	7.78962	7.0127	6.97471	7.35354	7.18009	6.81425	6.82794	P	P	P	P	P	P	P	M	P	P	P	P	hsa_circRNA_101746	hsa_circ_0038349	exonic	chr16	+	19627435	19693712	uc002dgn.2	C16orf62	ATAGACAAAGGTGGGAATGGAAGTGGCCCCACATCTCAAAGAAACC
ASCRP002094	44247.8	28784.3	30704.8	30541.5	64090.2	51418	14500.3	14285.3	22742.8	9466.67	34943	149151	15.5308	15.3077	15.3014	15.4029	15.7674	15.7006	13.8932	13.7541	15.2327	14.587	15.4454	16.1904	M	M	M	M	M	M	P	P	M	P	M	M	hsa_circRNA_101748	hsa_circ_0003645	exonic	chr16	+	19656207	19663412	uc002dgn.2	C16orf62	CTCTCCCAAGTGCACTCACTCTTGAGGATGAGAAAAGAATGCTGTC
ASCRP002095	72.6667	54.6667	63.6667	81.1667	72.8333	60.8333	207.167	208.833	82.3333	97.8333	128.833	180.667	6.2735	5.9263	6.23379	6.59067	6.36829	6.26766	6.55276	6.55815	6.16558	6.3172	6.55718	6.56771	P	A	A	P	P	A	P	P	A	P	P	P	hsa_circRNA_101749	hsa_circ_0038366	exonic	chr16	+	19659105	19659204	uc002dgn.2	C16orf62	GTTGATTCATGTTTCCTTTGGCCGTGATTTTGAACAACAGCTGAGT
ASCRP002099	150.333	166	74.5	262.667	160.167	104.167	2315.33	5439.33	138.5	184.5	364	1060.17	7.66646	8.34325	6.55435	8.71573	7.79684	7.35505	10.2954	12.3809	7.34778	7.59403	8.52641	9.04999	A	P	P	P	P	P	P	P	P	A	P	P	hsa_circRNA_101753	hsa_circ_0002696	exonic	chr16	+	21623965	21636436	uc002dje.3	METTL9	GTGGAAAACGTGGTATGTGTGCAACAGAGAGAAATTATGCGAATCA
ASCRP002101	61.8333	49	48.8333	59.6667	61.6667	54.1667	120	118.333	77.1667	80.3333	116.667	121.5	5.99068	5.73711	5.81058	6.02819	6.10195	6.02539	5.91827	5.83155	5.85	5.78041	6.33504	5.9482	A	A	A	P	A	A	A	P	A	A	P	P	hsa_circRNA_101755	hsa_circ_0006485	exonic	chr16	+	21979948	21987564	uc002djx.3	UQCRC2	AAGCTGCCAATTACATTACTTCGTTCAGAACCATTTCACAAGTGCA
[truncated: 1,935 more rows]

## Sheet: Box Plot - CircRNAs
Box Plot The Box Plot is a convenient way to quickly visualize the distribution of a dataset. It is commonly used for comparing the distributions of the intensities from all samples. Here, a boxplot view is used to look at, and compare the distributions of expression values for the samples in an experiment after normalization. Press Ctrl and rolling button of your mouse to zoom in.

[truncated: 1 more sheets: Hierarchical Clustering-CircRNA]
