# Supplementary material for: Comprehensive Analysis of a circRNA-miRNA-mRNA Network to Reveal Potential Inflammation-Related Targets for Gastric Adenocarcinoma
Source: Mediators Inflamm. 2020 Aug 1;2020:9435608. doi: 10.1155/2020/9435608 (PMC7416288; doi:10.1155/2020/9435608)
Supplement: Supplementary 2 — Table S2: differentially expressed circRNAs between tumor and normal tissues. [file 9435608.f2.xls]

## Sheet: CircRNAs
ID	adj.P.Val	P.Value	t	B	logFC	SPOT_ID	SEQUENCE
ASCRP002224	0.000242	7.87e-08	11.1349	8.00158	1.67562	hsa_circRNA_101882	CAAGTCCATGGCCTCTTCATGTGCTTGTGTGCAACGCAGCAACTTT
ASCRP004842	0.002397	1.56e-06	8.50269	5.47087	2.04188	hsa_circRNA_104589	CGGCCTCGGATGGTGGTATAAGTTGAAATCCAAACCAGGAAAGAAG
ASCRP002734	0.002841	2.78e-06	8.05573	4.95831	1.99826	hsa_circRNA_102415	CTACATGGCTGTTCTCCGGGGCTTGGCGTACCTCCGAGAGAAGCAC
ASCRP002905	0.005441	7.09e-06	7.36292	4.1088	3.14985	hsa_circRNA_102592	AGCATGCTGCAGGACGTACTCCGGCCTTTTCTGTGTGGTCATCAAC
ASCRP000083	0.007813	1.27e-05	-6.95132	3.57075	-1.41341	hsa_circRNA_000624	CCCCGTCTCGATGGGGGTGGGGCTGGATCCGAAAAGCGCGGACGGG
ASCRP001080	0.010115	2.99e-05	-6.37612	2.77517	-0.964841	hsa_circRNA_100706	AGCCCACCAGGAGTCCGCTCAGAATTTGATCAGATCGACACATCCA
ASCRP004736	0.010115	3.07e-05	-6.3582	2.74955	-1.00028	hsa_circRNA_104482	TTACTGGAGTCCAAGATGCTAATGCGAAGCTGCCGCCCATGCTGTC
ASCRP001015	0.010115	3.22e-05	6.32734	2.70532	1.13489	hsa_circRNA_100641	CAGCTGCCAGGTGTTCTTCTCTATGGGCCTCCAGGCTGTGGTAAAA
ASCRP002024	0.010115	3.29e-05	-6.31331	2.68516	-0.756142	hsa_circRNA_101677	CGGGGCGGAGAAATTCATTGAGTTTGAAGATGCTCTGGAACAAGAG
ASCRP003568	0.010115	3.3e-05	-6.31225	2.68364	-1.07417	hsa_circRNA_103270	CCACGCCTGCATCATGACTCATGGAGAGATTTCTCATGGATGGCTT
ASCRP002040	0.010115	3.62e-05	-6.25072	2.59483	-0.980759	hsa_circRNA_101693	AAAGCCCCAGACGGAAAGAGCTACTTGCTGAGTGCCCAGGGTGGCT
ASCRP000655	0.011503	4.49e-05	6.11171	2.39197	2.38822	hsa_circRNA_100267	CTTGCTGATGATATTGATCAAATTTTCTCCGGTGGCTAAAAAGTTG
ASCRP000430	0.011512	4.87e-05	6.06005	2.31581	1.64306	hsa_circRNA_100040	GCCTGTAGGGACTGTGTGTATATCGAGAGTCGGAGGCCAAACACAC
ASCRP004336	0.011848	5.68e-05	-5.96308	2.17167	-0.904095	hsa_circRNA_104062	AAGGAAGCACCGCACATTTTTCAGCCAAATTTGTATCCTACTGTGG
ASCRP004384	0.011848	5.79e-05	-5.95093	2.15352	-1.00269	hsa_circRNA_104111	AACTGCCCAGAGGTACTTGGAAGGCTCCATCGCCCCTGAAGACAAA
ASCRP002519	0.011852	6.34e-05	5.89306	2.06666	4.07073	hsa_circRNA_102191	TGATATTCATGAGTTTTGCGGCCTCCAGGTGGTGGATCCAATTTTT
ASCRP003904	0.011852	6.56e-05	-5.87191	2.03479	-1.0806	hsa_circRNA_103609	GCCAAACGCACCCTAGATTTGACGGGATCTGAACTATACACCCAGG
ASCRP002308	0.012794	8.02e-05	-5.74668	1.84462	-1.18694	hsa_circRNA_101968	AGCATGCAGGTGACCTGACCACCCTAACATCAGCTGCATACCAGCA
ASCRP000184	0.012794	8.57e-05	5.70535	1.78131	0.810052	hsa_circRNA_001046	TGGAATCCTACTTTTTCTCCTGGCTGAATTGTTCCCATCTCAAGTC
ASCRP001822	0.012794	8.74e-05	5.69339	1.76295	3.07324	hsa_circRNA_101471	GAGGAAACTCCACTCAATCGCAGGCCACTCTGCTGAGCATCTTCTC
ASCRP000189	0.012794	9.08e-05	5.6696	1.72634	1.11157	hsa_circRNA_001059	ATTCTGGGTAAAAGGACAGGGGGATGGCGTCTCCCACAGACGGTAA
ASCRP002897	0.012794	9.17e-05	5.66407	1.7178	2.82635	hsa_circRNA_102584	GCTGGTGCGAGCTACGACTTCCCGGCCGTGCTGCGCTGGTTCGCGG
ASCRP000356	0.016106	0.000121	-5.49606	1.45654	-0.818313	hsa_circRNA_001955	TGACAGCCCCATGGTAACCCAGAGAACACAGCCGAAGTGGAATGTG
ASCRP003424	0.016705	0.000131	-5.44811	1.38118	-1.08094	hsa_circRNA_103120	AAGCATCCCATTACAGATAGAAGAGCACCGACAGTAAATGGTTCAC
ASCRP001246	0.016806	0.000138	-5.41412	1.32753	-0.978987	hsa_circRNA_100873	CGCCCACATCTAGAACGTTGCCACCTTCCAGAGAAGAGGTACGAGA
ASCRP005134	0.016806	0.000142	5.39618	1.29914	1.06016	hsa_circRNA_104887	AAATTCTGCGTGCTCTATCTAGCAGAGGTGACACTGTTTGCCTATT
ASCRP002927	0.017477	0.000154	5.34997	1.22579	5.08754	hsa_circRNA_102614	ATGTACTGGGAACATCTGAGCTGCTGGCTAACCGGCCTCCTGCAAA
ASCRP005271	0.01804	0.000165	5.30799	1.15885	0.932496	hsa_circRNA_105024	TGTGGTAAACACTCGGCTGATCTTTCTCCTGGCCTGCCCTCCATGT
ASCRP005162	0.01804	0.00017	5.28823	1.12726	2.65695	hsa_circRNA_104915	TGTCAAGGAGATCGGCCTCTTGAAGTTCGTGCCCTCGTGAGGCTGG
ASCRP003491	0.018901	0.000193	-5.21365	1.00746	-0.891664	hsa_circRNA_103193	GGGCAGCAGACTATTCCTCTACACAGCCGACTAGTTATGATCAGAG
ASCRP002189	0.018901	0.00021	-5.16399	0.9272	-1.34606	hsa_circRNA_101846	ACCACCCCAGGCTCGGGCTCAAGTTCACTACAGGTCACAAAACATG
ASCRP000479	0.018901	0.000213	-5.1549	0.91249	-1.24773	hsa_circRNA_100089	TTTGATGATCAAGGTGGAGCATGACCCCGCCCATGGTGAACGCCTA
ASCRP003282	0.018901	0.000232	-5.10507	0.83152	-0.712481	hsa_circRNA_102975	TCCTTCGCCAAGGAGCCCCACGTAGAGCAGGTTCAACTCCTTCCAC
ASCRP003426	0.018901	0.000236	5.09565	0.81618	4.49176	hsa_circRNA_103122	AATGCTTAAGACTTCACATGTATCATTCTCCGAGCCTGATATTCCG
ASCRP003297	0.018901	0.00024	-5.08544	0.79953	-1.04942	hsa_circRNA_102990	CATCACTTAGGTCTTGACTCCACTAACGGGGACTTCTCATACGGCT
ASCRP002305	0.018901	0.000249	-5.06466	0.76559	-0.862588	hsa_circRNA_101965	GATCCACCAGGTTGGCTATACAGTGCGCTTTGATGATGTCACCTCA
ASCRP003704	0.018901	0.000259	-5.04164	0.72794	-0.618656	hsa_circRNA_103406	AGGCGACCCGTACTGGGCCTACTCTGCGTTGACAGAAGGCTACGTT
ASCRP003358	0.018901	0.000267	5.0228	0.69704	2.325	hsa_circRNA_103053	TTTGCTAAAGCTCTCTGGCCTGACAACCAATGTTGTGGACATTATT
ASCRP003824	0.018901	0.000269	-5.01948	0.6916	-0.587939	hsa_circRNA_103526	ACTAGGCCACGCAGCCACATAAAGAAGATCCCTAATAGTCATTTCT
ASCRP001934	0.018901	0.000273	-5.00934	0.67496	-1.09668	hsa_circRNA_101584	AACTCATGAGGACCTCAGCAGCCATGTCGAAGCCCCATAGTGAAGC
ASCRP003555	0.018901	0.000275	-5.00667	0.67056	-1.00639	hsa_circRNA_103257	ATCGTCACCGCCAACATGAAATGAGAAGCTGAGCCGCAATGAGACG
ASCRP000950	0.018901	0.000276	-5.00462	0.6672	-1.73229	hsa_circRNA_100571	TGTTTGCCTGTCAGCAGGTCTCTGTTCTAGGATGTCCCGACCCAGT
ASCRP002000	0.018901	0.000281	-4.99385	0.64948	-0.824629	hsa_circRNA_101651	ATCTATGGAGATTGTGCTTCTTGGTCAGACCCCGCATCAAGAATAT
ASCRP003079	0.018901	0.000287	-4.97986	0.62646	-0.661102	hsa_circRNA_102768	AGCGGCTGAGGTGAAGAGAAACGGATTCGGGAATTCTACCAGTCCC
ASCRP000836	0.018901	0.000294	-4.96601	0.60363	-1.281	hsa_circRNA_100453	ATCCTCTCTGGACAATCATGGAAACTGTGTACACCTTGGCATTTTC
ASCRP003546	0.018901	0.000309	-4.93811	0.55758	-0.994796	hsa_circRNA_103248	CCGCAGCCACATATCAATGAGTGTTTGAGTATCAGTGCCCCGTGCC
ASCRP002874	0.018901	0.000318	4.92195	0.53083	3.2951	hsa_circRNA_102561	TCATTCGTAACGGCCGCAAACTGACACCTCAGGGACAAAGAGATCT
ASCRP003937	0.018901	0.000319	-4.92007	0.52773	-0.553655	hsa_circRNA_103643	TCCACCACCGGGTACAGCAGGGAAGAACTGGAAACTCAGAGAAAGA
ASCRP002217	0.018901	0.000325	4.90852	0.50858	0.703388	hsa_circRNA_101875	CAAATTCTGCCCTGTTCCCTACTGAAGGAACAGATGCTAAGGAAAC
ASCRP001957	0.018901	0.000328	4.90423	0.50148	1.38712	hsa_circRNA_101608	ATTTATGCAGGCCTCATTGCTACGATTTCAGAGTACCCTGGTAATA
ASCRP001355	0.018901	0.000334	4.89294	0.48274	3.54226	hsa_circRNA_100984	AAAGTGCAGAGTATTCACAGGCCTCCACTGGGCTCTCAGTAGGTGG
ASCRP004617	0.018901	0.00034	-4.88319	0.46656	-1.33008	hsa_circRNA_104355	ATAGCTTCTCACCCTAAGGGACAGCCACAGTGTGGAAGACCCTGTG
ASCRP000876	0.018901	0.000343	4.878	0.45794	1.56329	hsa_circRNA_100493	AGAGTCATTACAATCAGTTGGCCTTATTTCCTCAGTGGAAATCTAC
ASCRP005194	0.018901	0.000345	4.8734	0.45029	2.55315	hsa_circRNA_104947	TGACTACCAGGCCTCCATGAAGAAGTGGACTATTCTGAGAAACTGA
ASCRP000098	0.018901	0.000349	4.86674	0.43921	1.95386	hsa_circRNA_000684	AAGGAAGCAAAAGAAAGTCTTGTTCTGTCATCCAGGCTGGAGTGTA
ASCRP000284	0.018901	0.00035	-4.86526	0.43675	-1.0947	hsa_circRNA_001498	GGGGGCGGGGAGGGACACCGTAGCATTCCTCACCTCCCCCAGAGAA
ASCRP004478	0.018901	0.000351	-4.8645	0.43549	-0.672235	hsa_circRNA_104205	GTGTTAACAGAGAAAATGCAAAATGCTGGCTCCTCTCATTCAAAAA
ASCRP003346	0.018966	0.000358	4.8525	0.41552	0.610208	hsa_circRNA_103041	GGTGAACTGGGATTGACTTGGCCTCTACTTCTTGTTAAGGAAATTC
ASCRP003477	0.019041	0.000369	-4.83507	0.38647	-0.784473	hsa_circRNA_103178	TGCTGCGGGAGGAGAGTTGTGGACTGGGGCAACCTTTGCCAGTGAT
ASCRP003124	0.019041	0.000384	4.81286	0.34938	2.78768	hsa_circRNA_102815	ATTCTCCGAGTATCCTAGAAGGAAAACATCACCATGGCTACAGAAA
ASCRP005170	0.019041	0.000384	-4.81181	0.34763	-0.57993	hsa_circRNA_104923	TCCACAGACTGCGATTCACAACCGACGTACAGCTAGGCCCTCAGTA
ASCRP002788	0.019041	0.000389	-4.80573	0.33747	-0.682189	hsa_circRNA_102471	TGTGCTGGAGCTCCAGGACACGCGCGCCCCGAGCCTGGGAGGCATG
ASCRP005360	0.019041	0.000406	-4.77988	0.2942	-1.61041	hsa_circRNA_400066	CCTGCCCCACCGGTCACAGCCTCATACCAAGGGCTGGAGAGACGAT
ASCRP000474	0.019041	0.000407	-4.77897	0.29268	-0.851153	hsa_circRNA_100084	AACCTCAAACCCGTTCTCCGAATTCCTAGAGGACCTGTGCAACAAC
ASCRP001951	0.019041	0.000409	-4.7757	0.2872	-0.601792	hsa_circRNA_101602	AAATAGTAGCACCAAACCTTTTGCCCAGAGTAGCAGCCAAACTTGA
ASCRP002071	0.019041	0.000415	-4.76801	0.2743	-0.603329	hsa_circRNA_101724	ACAGAGCAGGAGCAGGATGCAGAGGAGAACGGGCGTGAACCTGTCT
ASCRP003384	0.019041	0.000415	4.76737	0.27322	0.49764	hsa_circRNA_103080	TTTCTTATGACACTTTTGTGTTCTTCCTGTCCAAGATCCGGTCCCA
ASCRP002251	0.019212	0.000431	4.74673	0.23858	2.06608	hsa_circRNA_101909	ACACGGAGGCCGTGATGAAGGAATGGGTACCACAGACCATGTCATC
ASCRP003461	0.019212	0.000435	-4.7416	0.22996	-0.752998	hsa_circRNA_103160	GACCAACTCATTCTCTTTCAACATGTTCGACCACCCTATTCCCAGG
ASCRP001291	0.019212	0.000438	-4.7372	0.22256	-0.721921	hsa_circRNA_100918	GGACACCTACTCATGAAATGTTTGTTGACTTAATTCAGTGCACAAA
ASCRP003815	0.019402	0.000453	-4.71777	0.18986	-0.866509	hsa_circRNA_103517	AGTGGGATGAGGTTTCTAATATTCAGGCAAGAGCAGTTGTGTTGTC
ASCRP001668	0.019402	0.000458	4.712	0.18014	2.51336	hsa_circRNA_101309	GCCTCCATAGCATTGTCGTGGAAGTTCTCCGAATCCTGGTTTTGAT
ASCRP001144	0.019402	0.000464	-4.70456	0.16759	-1.69809	hsa_circRNA_100770	CTTTCCATCCTCATCAAGAAACAGAATTGGGAAAAAGTCAATAAGC
ASCRP002258	0.019402	0.000468	-4.69989	0.15972	-0.542024	hsa_circRNA_101916	TGGATTACCGCAGACCCGAGAACAGGCCACGGCAGAGACAACGTGT
ASCRP000933	0.019554	0.000478	-4.68697	0.13792	-0.668346	hsa_circRNA_100553	CACGCTTACGGGATGATCCACCAACACATTCTCAGCCAGACAGTGA
ASCRP001381	0.019554	0.000484	4.68025	0.12657	1.43348	hsa_circRNA_101010	AACCAGTCTCAGGCCCAGATGTATCTACGGGCCACAATTGCTGCCA
ASCRP002779	0.020501	0.000524	-4.63528	0.05046	-0.876256	hsa_circRNA_102462	AGCGTCATCAAGTGCCGCCTGCCCCTGTCAACAAGGACGACTTTGC
ASCRP001236	0.020501	0.00053	-4.62871	0.03932	-1.05577	hsa_circRNA_100862	TGTAAGGCAGCCTCGCCGCTCCTGCTATTTGCCAACCGCCGGGACG
ASCRP000194	0.020501	0.000536	-4.62183	0.02765	-0.608524	hsa_circRNA_001073	AGACCCCAGGGTGCCTCAGACAAGAAAGGGTAAGCGTGAGCCAGGT
ASCRP004315	0.020501	0.000544	4.61394	0.01426	1.54187	hsa_circRNA_104040	CCTATGTTGGAGATCCTGCCCGGCCTGTACATCGGCAACTTCAAAG
ASCRP002335	0.020501	0.000546	-4.61215	0.01121	-0.966503	hsa_circRNA_101998	ATCAAACCCAGCCTGACCTGTGGATGAAGAGCCAGAGTCCTCTGAG
ASCRP002585	0.020501	0.000556	-4.60198	-0.00606	-0.521269	hsa_circRNA_102257	CAAACTTGCAGCCCAAGAGAACAGTTGTCGCCGTGATCCTGAAGGC
ASCRP002185	0.020501	0.000561	4.59687	-0.01476	0.512007	hsa_circRNA_101842	TCTCCTGGCTGCTGCTTGCATATGCCACAGCAAACACAGGTGTGCA
ASCRP002139	0.020501	0.000561	4.59667	-0.0151	1.01834	hsa_circRNA_101794	AGAAACTCAGGACTCTCTGGGTGGCTCAGCCCACAGTATCCTTATT
ASCRP003088	0.021414	0.000593	4.56538	-0.06836	3.39704	hsa_circRNA_102777	GAGGAGAAAGGAATCCTACGGCCCCTGAATATTTTGGCATCTTCAA
ASCRP002489	0.023056	0.000646	-4.51717	-0.1507	-0.821829	hsa_circRNA_102157	AATCTTATCAACGACGAGTAGAACAGCCCCTCTATGGTTTAGATGG
ASCRP005241	0.023756	0.000685	4.48409	-0.20735	1.77389	hsa_circRNA_104994	ACGTCACCAGTGGGCTCGGGATGAGTTTGAAGGCCTCTTCAAGCAG
ASCRP001265	0.023756	0.00069	-4.48026	-0.21392	-0.400599	hsa_circRNA_100892	AAATGATTTATGCAAGTTTAAGCCGCCTGTCTTGGTTAGATGGCTC
ASCRP002509	0.023756	0.00069	-4.47993	-0.21448	-0.892093	hsa_circRNA_102180	CGCCCCAGAGATTCTATGCGGCAGAGATTTCCATCGGATTGTTCTT
ASCRP001570	0.023756	0.000696	4.47486	-0.22319	1.12997	hsa_circRNA_101207	TCATGTGCTCGGCCTTTGCTGCAGGTTAAAGATCGAGGTCCGGAAG
ASCRP001400	0.024203	0.000717	4.4582	-0.25179	0.666942	hsa_circRNA_101030	TGTGCTTCCCTAGGTGGTTACCCTAACAGCTAATGATAAGACAAGT
ASCRP003845	0.024249	0.000731	-4.44785	-0.26958	-0.797527	hsa_circRNA_103547	TTGCAGCCAAAGAGCTCCACTGGTTCAACAGCCTCTCCTCCAGTTT
ASCRP000573	0.024249	0.000741	-4.44011	-0.28289	-0.690326	hsa_circRNA_100184	CATGCAGGCCCCAACAGTTGTGATTCCAAAGAATCCCTATCCTGCC
ASCRP004601	0.024249	0.000742	-4.439	-0.2848	-0.854795	hsa_circRNA_104338	ACCAACCGCCAGATCGGATTTATGAGGAATCCAAGATGAATTTGGA
ASCRP001993	0.024693	0.000764	4.42295	-0.31244	0.550343	hsa_circRNA_101644	AACACGGGCTTCCTCATGTCGTCCTACAGGGAAATGGTGTCCTGCT
ASCRP001008	0.024776	0.000775	-4.41522	-0.32576	-0.629619	hsa_circRNA_100634	GCAGCAGCAGGCCCTACCACAGGCTGAATCCTGACTATGAGAGGCT
ASCRP003158	0.024911	0.000787	-4.40639	-0.34098	-1.41752	hsa_circRNA_102850	TAAAATCACAGGGAGATATACTTCCCAATTCATCAGATTATAAGTC
ASCRP004949	0.025402	0.000816	-4.38638	-0.3755	-0.969966	hsa_circRNA_104697	GAACGAGCGGGTGGTGGGCAGCATGGACGCCCACCCCAATCGCTAC
ASCRP002877	0.025402	0.000819	4.38413	-0.37939	1.91019	hsa_circRNA_102564	TTTCCGAGCCCGTCTATGACAAGACTCCGGGATTGTGGAGGGCTGC
ASCRP002928	0.025995	0.000855	4.3603	-0.42058	3.39779	hsa_circRNA_102615	AAACCCAACCCAGGCAGCGACATGCTAACCGGCCTCCTGCAAAGCT
ASCRP003889	0.025995	0.000855	4.36015	-0.42084	2.63586	hsa_circRNA_103594	TTCAAGCCTTAGAAGAGTTCTGCCGCACCACGGCCTCCACGCAGCA
ASCRP004920	0.026661	0.00089	4.338	-0.45918	0.545561	hsa_circRNA_104667	CAACTTGACATCTCTTTTGGAAAAGTTCTTGATCCCCAATGCTTCA
ASCRP004071	0.026661	0.000901	-4.33087	-0.47155	-1.89151	hsa_circRNA_103781	CTGCTCCACGCCCATCGATTTGAGTGCATGCACTGTTGCACTTCAC
ASCRP003825	0.026661	0.00091	-4.32576	-0.4804	-0.609067	hsa_circRNA_103527	ATTCAGCCGTCAGCCACATAAAGAAGATCCCTAATAGTCATTTCTC
ASCRP000049	0.026661	0.000912	-4.3245	-0.48258	-0.616492	hsa_circRNA_000446	TTCTCACACGCAGAAGACGATAGGAATAGGAGGAGGCAGGGCGGGC
ASCRP003857	0.027286	0.000956	4.29825	-0.52815	3.22174	hsa_circRNA_103559	CTTTGAAACACTCCTAAAAGACGACGGCCTGCACGTTCAATTTTTG
ASCRP002884	0.027286	0.000959	4.29612	-0.53185	2.54184	hsa_circRNA_102571	CCCTTCTAGGGCGCCCGCTCCGGCCGGCACCATGGACAGCGAGGCA
ASCRP004630	0.027286	0.00096	-4.29604	-0.53198	-0.708757	hsa_circRNA_104368	TTCACTGCAGGGCTCCAGGGAGTTCCACGCTGTCCAGTTCTCTCTG
ASCRP002659	0.027709	0.000983	-4.28241	-0.55567	-0.562833	hsa_circRNA_102340	AAACAACAAGGAGCCACCAGAAATGGAACTATTGAAATTTTTCAGG
ASCRP000770	0.028051	0.00101	4.26772	-0.58122	2.84223	hsa_circRNA_100385	GGACAGCGTCTCCGTACAGATGACCAGCTGAACTCAGAAGAAAAAA
ASCRP001778	0.028051	0.00101	-4.26556	-0.58498	-1.59106	hsa_circRNA_101419	GACTCAACTGCCCTACCATTGACCATGCCCTGCTGGACATGCCCTT
ASCRP004253	0.028429	0.00105	-4.24842	-0.61485	-0.799947	hsa_circRNA_103973	CTGATAGCAGGTACATCCAAGCAGAAGTCCAGTTCCCTCCAGGTAG
ASCRP005333	0.028429	0.00105	4.24829	-0.61507	0.493746	hsa_circRNA_400037	CACTCAAGTGTTTCCTAATGTTATCTCAAGCTTCTCTGGTCCTCTT
ASCRP001578	0.030732	0.00115	-4.19648	-0.7055	-0.607658	hsa_circRNA_101215	TGACCAACCGCCTGCAGAATCCTGCCGCCTTTGACTTCCTGCTGCA
ASCRP002929	0.030732	0.00116	-4.19225	-0.7129	-0.658992	hsa_circRNA_102616	GCAGCGACATATCCTACATGGCTTTCCACCAACCTGGGCATCCTGA
ASCRP003339	0.030732	0.00117	-4.18837	-0.71968	-0.556134	hsa_circRNA_103033	TCTACTAAAGCCCCGTCGCAGAATTTAGTCTCAAAGGAAACTTCAA
ASCRP002786	0.030732	0.00119	-4.1776	-0.73852	-0.456182	hsa_circRNA_102469	AAGAGGCTGACCGCAAATACGAGGAGGCTGAAGGTGATGTGGCCGC
ASCRP002296	0.030732	0.0012	-4.17364	-0.74544	-0.437283	hsa_circRNA_101956	AGCAGTACAGAGGAGGTGGCCAAGTTGGAGAAGCACTTGATGCTTC
ASCRP000540	0.030732	0.00121	-4.1684	-0.75462	-0.411671	hsa_circRNA_100151	CATACCCCGGGTTACACGCATGGGGAGATACTCTGGAGGAAGCATT
ASCRP002818	0.030732	0.00121	4.1682	-0.75497	0.480136	hsa_circRNA_102504	TAAACTCAAAGCTGCTGCTGCTGCACTACAAGGCCAGCGCGGAAGT
ASCRP001825	0.030732	0.00121	-4.16767	-0.7559	-0.639065	hsa_circRNA_101474	TTACCACTGCAAAAAGGTGTGCAAGCCCCGTAACCCCTGCACGGAT
ASCRP003406	0.030752	0.00122	-4.16152	-0.76668	-1.91481	hsa_circRNA_103102	TTGTATAAATGAGCTTACTCCACGGGAACAGCCTCTAGATAATCTG
ASCRP000466	0.030752	0.00123	-4.15831	-0.7723	-0.467624	hsa_circRNA_100076	GATCCGGGAGATGAGCGGGGCAAGGACCACCTCCGGGCGGGCAAGC
ASCRP004093	0.031379	0.00127	-4.14278	-0.79953	-0.564682	hsa_circRNA_103803	TACAGTCAGCTCACAGTTCAAGGCAGTAGACAGCAGGGACTCCCTG
ASCRP002341	0.031463	0.00128	4.1369	-0.80983	1.85833	hsa_circRNA_102004	ATGGCCTCCAGGTGATGACAATGGGAAGAAGGCCAACAACCCCAAC
ASCRP004411	0.032031	0.00131	-4.12272	-0.83473	-0.831162	hsa_circRNA_104138	GCCTGTAATTGAAAGAATACCCACCTCATGTCCAAAAAGTTGAAAT
ASCRP002022	0.032173	0.00133	-4.11597	-0.84657	-0.537875	hsa_circRNA_101675	CGATTTACTGGGACTTTGAACATGTCGGGGATCGCCCTCAGCAGAC
ASCRP001644	0.032492	0.00135	-4.10626	-0.86363	-0.560039	hsa_circRNA_101283	ATAGAAATCCAATAGGCATCAGAGACCCCAACTCTACAAGGCCTTT
ASCRP000626	0.032955	0.00138	-4.09426	-0.88473	-0.620737	hsa_circRNA_100238	CGGCCCACAGCCTTTTATGTCACCGCGATACGCAGGCGGCCCCAGG
ASCRP000561	0.033463	0.00142	-4.08033	-0.90923	-0.837348	hsa_circRNA_100172	TAATGTTACCCGTCGCCCTGCTAGCCATCAGACCTGCGGGCGCTTA
ASCRP001345	0.033463	0.00145	-4.0704	-0.92671	-1.50224	hsa_circRNA_100974	CAGAGTCCAGCGCCTAGAAGATTATCAGCGTCGCCTTGATACCTCC
ASCRP000383	0.033463	0.00147	-4.06318	-0.93942	-1.05491	hsa_circRNA_002117	AGCAGGGTTGGCGGCGATGTCCGAGGGCCCGGGGCGGCCCCCCTCG
ASCRP003740	0.033463	0.00148	-4.05642	-0.95133	-0.915033	hsa_circRNA_103442	GCAGCGTCAGGTCTTCCGACCCCGAACTCCACCGGAGGCAATTGCA
ASCRP000411	0.033463	0.00149	-4.053	-0.95736	-1.02257	hsa_circRNA_100021	CACGTCCCCTTCGAAAAACAGACACATGACCCTCATTGAGAACTGC
ASCRP002145	0.033463	0.00149	4.05221	-0.95876	1.7429	hsa_circRNA_101800	ACTCATCCAGTATGATTGCGGACTCCCTGGAGGAAAAGCGGAAGCG
ASCRP005056	0.033463	0.00151	4.04621	-0.96933	3.04963	hsa_circRNA_104807	ACAAGAGCAGGCCTCAGGATCATTCAGCTCAGCAAACAAATACAGC
ASCRP003014	0.033463	0.00153	-4.03858	-0.98278	-0.581771	hsa_circRNA_102702	CATAGGAACGCACTCAGGCAGCCTCTACAACCCCACGTCAGAGTGT
ASCRP004541	0.033463	0.00154	-4.03619	-0.987	-0.604354	hsa_circRNA_104271	AGACCAGGGACCAGCCTGATTACATCAACCCCAGAGCCGTGCAGCT
ASCRP001628	0.033463	0.00154	4.03549	-0.98823	1.75904	hsa_circRNA_101267	AATTACCTCTCAGGCCTTTGAAGACCTCAGCAAACTAATGATCAAG
ASCRP004953	0.033463	0.00155	-4.03352	-0.99171	-0.378293	hsa_circRNA_104701	AATGTGGCAGCCCAATGTGGAGCCCAGCAGACCGGGTTATCCCAGT
ASCRP001053	0.033463	0.00155	-4.03272	-0.99312	-0.968932	hsa_circRNA_100679	CACAGCCGAGGTGCCGACGCCACCGCCGAGCCCATGATCCTGGAAC
ASCRP002431	0.033463	0.00156	4.03028	-0.99743	0.582609	hsa_circRNA_102096	TCATGTACCCCTTCTGTTCTCTGGGGAGGCAGTAAGGGGCCGTGGA
ASCRP000636	0.033463	0.00156	-4.0296	-0.99863	-0.579914	hsa_circRNA_100248	ACACACTGAGTGATCAAGTTGTTCCTGCAGCACAGTCTTCACCTAT
ASCRP002336	0.033581	0.00157	-4.02389	-1.00871	-0.597495	hsa_circRNA_101999	AGTGTAGGCATCAAACCCAGCCTGAACATTGACATCACCAATTTCA
ASCRP003393	0.034132	0.00161	4.01124	-1.03104	0.576476	hsa_circRNA_103089	CTATACCTACTGGGTTCCCCTGGTGCTGCGAGTGGCTGAGATGCTG
ASCRP002270	0.034348	0.00163	-4.00406	-1.04372	-0.5639	hsa_circRNA_101928	TTCTGTTCTTCGTAGCCGGGGAGGCATCCCCACGCTCATCATGCTG
ASCRP001573	0.03578	0.00173	-3.9727	-1.09917	-0.405178	hsa_circRNA_101210	ATTGTGGGTCCTGAAGAATTGCAACAACACCAAACGCCGCTTTTAA
ASCRP002124	0.03578	0.00174	-3.97102	-1.10214	-0.488476	hsa_circRNA_101778	GCTGAGAGCAGCTGGGGCTGCCCCGACCTCGTCTGCTACACCGATT
ASCRP004848	0.03578	0.00174	-3.97076	-1.1026	-0.680952	hsa_circRNA_104595	ACACCACCTACTTCTCCGTCAATGTTTCAGCCCAGCCCTGGGGAGC
ASCRP003536	0.035801	0.00176	-3.96459	-1.11353	-0.521444	hsa_circRNA_103238	ACCAGCCCTGTCTGCAGATCTCCAGGGGAGCCCACCAGCCTAGTCA
ASCRP004274	0.035801	0.00177	-3.96068	-1.12044	-0.455882	hsa_circRNA_103994	CCTCCTCAAGAGAGCAGCCCTGAGTCTCCAGTGACCATTACAGAGC
ASCRP002021	0.035801	0.00177	3.9596	-1.12235	0.60649	hsa_circRNA_101674	TTAATGTGGGCCATGTCTGTCGTGGCATTCCTGGTGGCTTTCCATC
ASCRP005249	0.035977	0.00181	-3.94951	-1.14023	-0.733651	hsa_circRNA_105002	GATGCCCAAAGGACCGCTATCCACGCATTGGAGACATCCTGCAGAA
ASCRP001290	0.035977	0.00181	-3.94831	-1.14236	-0.647622	hsa_circRNA_100917	ATGGAACCACTAAGAACACATCAAAGCTGCCCAATGATCTGCTTGA
ASCRP000605	0.035977	0.00182	3.94544	-1.14744	0.969426	hsa_circRNA_100217	ATCTGACAAAGGACTCCAACAGAGCAAGATGTGTCTTGCTGAATCA
ASCRP003104	0.035977	0.00183	-3.94285	-1.15203	-0.452056	hsa_circRNA_102795	AGCCCCTCTACATCGAGGCTGTTTGGGGCAACTTCGTTAATATGAG
ASCRP001656	0.036093	0.00185	-3.93763	-1.16128	-0.881617	hsa_circRNA_101296	CTACCCATCAATCCCCAGCTCAAGGGTATAGTGACCAGGTTATATT
ASCRP004292	0.036983	0.00191	3.91766	-1.19668	0.564075	hsa_circRNA_104017	TCATCACCACGCCCTGGCCTCCCACGACTACATCCTGAAGATTGTG
ASCRP001128	0.036983	0.00192	-3.91707	-1.19773	-1.10789	hsa_circRNA_100754	GCAACCAGAGGCGTGCCGATGCTCTCCGTCCAGCCCAAAGGGAAGC
ASCRP003157	0.036983	0.00193	-3.91414	-1.20293	-1.10271	hsa_circRNA_102849	TCGCTGAACAGGGAGATATACTTCCCAATTCATCAGATTATAAGTC
ASCRP001111	0.03728	0.00195	-3.90643	-1.21661	-1.03097	hsa_circRNA_100737	TGTGCCCATCACAGGTGTACATCGGTGAGCTCCCGCAGGACTTCCT
ASCRP004970	0.03762	0.00198	-3.89817	-1.23129	-0.857269	hsa_circRNA_104719	AGTCTGGAGCCGCCCAGAGAGTGCGCTAGATGTTGGACCGAGTATG
ASCRP003141	0.037622	0.002	3.8948	-1.23727	0.434138	hsa_circRNA_102832	CCAGGTTCAAGATTCTGGACTCTACTTATAATATCCCTAACTGCTG
ASCRP002741	0.038579	0.00206	3.87749	-1.26801	0.487085	hsa_circRNA_102422	ATCAGCGGCTCTTTGTATGATGACGTGTGCTTCCCGCACAGCTGCA
ASCRP004249	0.038579	0.00209	-3.87044	-1.28054	-0.657309	hsa_circRNA_103969	GAAGCAGCAGGTTGAATCATTTATTTTGGACCAAGAAGATCTGGAT
ASCRP002087	0.038579	0.00209	-3.86944	-1.28233	-0.869101	hsa_circRNA_101741	TGCCCCCGAGGTGGGAATGGAAGTGGCCCCACATCTCAAAGAAACC
ASCRP001773	0.038579	0.00211	-3.86594	-1.28854	-0.391839	hsa_circRNA_101414	CCCAGTGCAGGAGACCAGCATAAACACTTTGGGGACTGAGAGGATA
ASCRP001277	0.038579	0.00211	3.86393	-1.29211	0.804056	hsa_circRNA_100904	GGGTCCTTTCCTGGCCTTGGTGCTGTAAATGCATTGATGGAAAAAA
ASCRP002242	0.038579	0.00212	-3.86165	-1.29618	-0.611656	hsa_circRNA_101900	ACGTGCAACAAAGTGCGATGGTGACCAAAAGCCAGCCCCACTGTGA
ASCRP000350	0.038668	0.00214	-3.85681	-1.30478	-0.46658	hsa_circRNA_001914	TTTGCTGTTAGGTACCTGCTGGCGCTCATCACTCAGGTGGTGGGAT
ASCRP000028	0.038668	0.00215	-3.85403	-1.30972	-1.11244	hsa_circRNA_000280	GGGCAGCAAGGTTCGTCCAGCTCCACGCCCACCCACTGGCCGCTGG
ASCRP000156	0.038862	0.00218	3.84819	-1.32012	1.45839	hsa_circRNA_000936	TGCGGTAGGGGCCTCCTTAAGGAAGGTGCAAGAGGTTGGCAGCTTC
ASCRP000255	0.039057	0.00222	-3.8375	-1.33914	-1.06597	hsa_circRNA_001359	TGGGGCAGGGAGAGTATGGGAGCCAGAGGAACATCATTATCTAATA
ASCRP003129	0.039057	0.00223	-3.83562	-1.34249	-0.42471	hsa_circRNA_102820	AAAGAACCAAGCCGAGAAGGATCTGCCCAATAACATGATTCATCAG
ASCRP000787	0.039057	0.00224	-3.83297	-1.34721	-0.636921	hsa_circRNA_100403	CAACTGGAAGCACCCCATCTGCTTTGATATGATTGAAGAAGCATAC
ASCRP003890	0.039057	0.00224	-3.83203	-1.34888	-0.673787	hsa_circRNA_103595	GCCCTCGCAGGTCCAGCACCATGATGCCATCACTGGGACTGAGTCC
ASCRP000945	0.039057	0.00225	-3.83	-1.3525	-0.714553	hsa_circRNA_100565	GCTCACACCAATCCCCTGTAAGCAGCTTACAGATTCGCTATGATCA
ASCRP004781	0.039434	0.0023	-3.81893	-1.37221	-0.579416	hsa_circRNA_104527	GAGCACAGAAAGAACGATCTCCTCAGCAGAATATAGTATCTTGTGT
ASCRP004679	0.039434	0.0023	-3.81748	-1.37479	-1.81582	hsa_circRNA_104423	CCCCAGCTCGATATGTGTCACAAAGATGTCTACACGGAACTGCCAG
ASCRP001266	0.039434	0.00231	-3.81575	-1.37787	-0.337507	hsa_circRNA_100893	GATTCAATAAGAGATTATGAAGCCGCCTGTCTTGGTTAGATGGCTC
ASCRP002710	0.040132	0.00237	-3.80274	-1.40106	-0.61857	hsa_circRNA_102391	AGAAATAGCCTACCAGAACTTAACACTACAAGCGGAAGCCTTCCTT
ASCRP003605	0.040132	0.00238	-3.80032	-1.40538	-1.31181	hsa_circRNA_103307	TGCCCCCTTTCACAGGTGATCTTTAGACAGTGACTGAGTATGGATC
ASCRP004081	0.040307	0.0024	3.79503	-1.41481	0.581579	hsa_circRNA_103791	TATGTCATAGCTTCTGGTGTTGTTCCTTTACTAGGACTGGGCACTT
ASCRP001350	0.040523	0.00243	-3.78921	-1.42518	-0.945387	hsa_circRNA_100979	GGAAACTCTGGTGTTAAGCCCCACCTACAAGCAGAGAAATGAAGAC
ASCRP002480	0.040531	0.00244	3.78618	-1.43058	0.65873	hsa_circRNA_102148	TTCCACAGTGATTGATGCTGCCTCAGTGGTTCCCCCTGGAAGTCCT
ASCRP003549	0.041154	0.00249	-3.77505	-1.45043	-0.733142	hsa_circRNA_103251	AAGATAACCAAGACAAGAGAAACAGCACCCAGGACTATCTTCCAAA
ASCRP002802	0.042584	0.0026	3.75318	-1.48947	1.37891	hsa_circRNA_102485	CAGTCCACAGAGATGGGATCTCACTATATTGCCCTGGCTGGTCTTG
ASCRP003681	0.042584	0.00261	-3.74933	-1.49635	-0.462206	hsa_circRNA_103383	AACATTGCCCACCGAGATGTCAAGCTCCTGTATGACAGCCCCAAGG
ASCRP002796	0.042584	0.00262	-3.74806	-1.49862	-0.748971	hsa_circRNA_102479	ACGAGTTCCTGCTCAACAAGGGAGAGGCGCACCTCCTTCTCCACGA
ASCRP002880	0.042701	0.00265	-3.74139	-1.51054	-0.772321	hsa_circRNA_102567	AACCACCCCAACATCGGTTGCCATCAAGATTATCGACAAAACCCAG
ASCRP003808	0.042701	0.00267	-3.73875	-1.51525	-0.998811	hsa_circRNA_103510	CCCGTTCTTCCGAAATGTTGATTGGGATATGTTATTTTGGAAAAAC
ASCRP002233	0.042701	0.00267	-3.73812	-1.51638	-0.701855	hsa_circRNA_101891	TCCAACATGGAGTACATGAGCTCAAGCGCCCAGCTCTGCCCGAGGA
ASCRP000751	0.043094	0.00271	-3.72919	-1.53232	-0.436285	hsa_circRNA_100366	AAGACCGCCCAGCGTCGAAGCCTGTCTAGCAGTCCAGAGGAGATGT
ASCRP004582	0.043094	0.00272	3.72762	-1.53514	0.350277	hsa_circRNA_104319	AAGAGGCTGCTTCCCCTGGAGGAACGCGCATAGATGATGGTGACAA
ASCRP004878	0.04317	0.00274	3.72391	-1.54176	0.433705	hsa_circRNA_104625	GCTTGCATTGTTTTCTGAGTTTAACCAGTAATGCCATTCAGTTGCC
ASCRP005161	0.043258	0.00276	-3.72006	-1.54864	-0.417347	hsa_circRNA_104914	ACTACAGTGACCAGGCAGAATCCAGAGACCACATTTGAAGTATATG
ASCRP004465	0.043347	0.00278	3.71623	-1.5555	0.66374	hsa_circRNA_104192	GATTTCCATGTGGACGGCCTGTTTCATCTTACTATGAAAAAGAGAA
ASCRP000087	0.044215	0.00285	-3.70285	-1.57941	-0.682263	hsa_circRNA_000639	GAGCAGGTGGGTATGGAGCAGCAGGGAAGATCATCCATTTGGGAAT
ASCRP003954	0.044373	0.00288	-3.69825	-1.58765	-0.660353	hsa_circRNA_103660	CGGCCAGGAGACCACGTTGATGAGCGAACAATATGCAATGGAATTG
ASCRP003749	0.045295	0.00295	-3.68451	-1.61223	-0.521756	hsa_circRNA_103451	TCGAAGGGCGGGAAGGATTCTTCAAAATTAACAGAAACCAATTCGG
ASCRP003802	0.045696	0.00299	-3.6771	-1.62548	-0.651144	hsa_circRNA_103504	GTATTCACCAGTTAATAGCACCAGATCAACCTCTCCACTTCTCCTA
ASCRP002092	0.04587	0.00302	-3.67182	-1.63494	-0.439612	hsa_circRNA_101746	ATAGACAAAGGTGGGAATGGAAGTGGCCCCACATCTCAAAGAAACC
ASCRP005175	0.04587	0.00304	-3.6683	-1.64123	-0.784312	hsa_circRNA_104928	TGGAGTACTTGGTCTCAATGCCAGGAAGCCTCCCGCTCCTAAACAG
ASCRP000104	0.04587	0.00307	3.6635	-1.64983	0.553823	hsa_circRNA_000711	TCTATTTTCCTGAGGTTGCTGCTGCTGTCAAAGGCCCATTCAATTT
ASCRP005270	0.04587	0.00308	-3.66088	-1.65453	-0.557728	hsa_circRNA_105023	AGCAGGTTGAGGTGAAAGCCCAGCCTCCGTGGTTCTTAATGCCTCA
ASCRP000889	0.04587	0.00308	-3.66049	-1.65521	-0.384691	hsa_circRNA_100507	ACCCATACCAGGACCCTGCTTTCTCGGCTGTGATTCACGACAAACT
ASCRP001033	0.04587	0.0031	3.65761	-1.66038	0.516312	hsa_circRNA_100659	TGAAGAGCTTGTGGCAGATGCCTTTGTGTTCCTTGCTGACCTGCCT
ASCRP003821	0.04587	0.00311	-3.65672	-1.66197	-0.793349	hsa_circRNA_103523	AATAAGCCCACCCTTTATCGGAATCATGGGTAAAGAAGGAAGACAG
ASCRP004945	0.046311	0.00316	-3.64758	-1.67834	-0.531067	hsa_circRNA_104693	GCTGGAGGAGGTCGTTTTCTGATGTGACGGCTGAGACATGAGATCT
ASCRP000235	0.046311	0.00317	3.64646	-1.68034	0.809069	hsa_circRNA_001240	ATCTCTGTGTGACTATGGAGGTCACGTCCCATGTGGCTGTGGAGGT
ASCRP002610	0.046985	0.00323	3.63618	-1.69876	0.432156	hsa_circRNA_102291	CACCTGTCAGTCCCAGGTGCTGTTCCCACTGAATCCATACAAGGAA
ASCRP003227	0.047141	0.00325	-3.63186	-1.70649	-0.758244	hsa_circRNA_102919	GAGACCCCAGCATTTAAGAAGCCAAAACACACAAGTCGGTGGTGAT
ASCRP004914	0.04715	0.00327	-3.62925	-1.71118	-0.453192	hsa_circRNA_104661	CACAATTCCGGTGTGAAATCTAAGAATCCCCTGCCAACTCTTGAGG
ASCRP002863	0.047266	0.0033	-3.62444	-1.7198	-1.19369	hsa_circRNA_102550	ACCCCCAAGACCAGTCCAGGAGGTGCAGCCCATCACCAGTTATGAC
ASCRP004671	0.047266	0.00331	3.62292	-1.72252	0.398923	hsa_circRNA_104415	TAACCGCAGGCATGCTGTCTTGTCGACGGTCTCACTGATGCCTCTT
ASCRP004073	0.048343	0.0034	3.60839	-1.74857	2.36002	hsa_circRNA_103783	CGTGCGGCCTCATCATAAGGTATCCTGAAGAACTTGCCTGGCACAC
ASCRP000485	0.049276	0.00348	3.59569	-1.77135	0.427564	hsa_circRNA_100095	GGAGTGTTCTGCACTTACACAGGTCATCATCAGATTTGAAATATTT
ASCRP000473	0.049896	0.00354	-3.58655	-1.78773	-0.746091	hsa_circRNA_100083	AATGCTTATGACCCCTTATCCCTCTGGACAGAATGCAGGTCCAACC
ASCRP000969	0.051762	0.00369	-3.56448	-1.82734	-0.402626	hsa_circRNA_100593	GTTGTATAAATGTACAGTAACTGGTATGAACCCTCTGTCTCCTTAT
ASCRP000300	0.052287	0.00375	-3.55665	-1.84139	-0.708059	hsa_circRNA_001579	TTTTGTAAAATGTCCCCCAACGAACCCACATGCCATTGACTCCCGA
ASCRP002860	0.052537	0.00378	3.55169	-1.85029	0.715068	hsa_circRNA_102547	ATTCTCCAGACGAGAGACTGTGCCCTGTCCACGGTGCCTCCTGCAT
ASCRP001460	0.053003	0.00384	3.5427	-1.86644	0.888519	hsa_circRNA_101092	AGTGAAGATGTGCTGTGATCTTGGCTACCATGCAAGTCTGAACAGA
ASCRP004852	0.053003	0.00385	-3.54216	-1.8674	-0.587203	hsa_circRNA_104599	AAGACCAGAGTTTCACGAGCAAGGTCCGTGGTCCTGTCAGTGGAAG
ASCRP002299	0.053251	0.00391	3.53374	-1.88253	0.834634	hsa_circRNA_101959	ACGTGTGCACTGCTAAGGTCTCGAAGGCCACATTGCAGGAGATCCT
ASCRP000058	0.053251	0.00391	3.53357	-1.88282	0.408322	hsa_circRNA_000508	AGTTAGGTAAGGAGGGGTCTGTTCCCTTCCTGGGCAGAGAAGGTGT
ASCRP001311	0.053251	0.00392	-3.53254	-1.88468	-0.594941	hsa_circRNA_100938	GGGGCATTATGCTTCCCAGACCGCCCATGCCAACTTCCGTTCCCAT
ASCRP000484	0.053541	0.00397	-3.52503	-1.89815	-0.395067	hsa_circRNA_100094	TACTGTGAGCACAATGCCAGCACAACGCCGCAGGGGAGTTCTGCGA
ASCRP000397	0.053541	0.00398	-3.52494	-1.89833	-0.582933	hsa_circRNA_100007	AGAGATGACCCCTTATGAAGATGAGCAGCACCAGCAGTAAGAGGGC
ASCRP002571	0.054095	0.00406	3.51411	-1.91778	0.433319	hsa_circRNA_102243	AGATGCAGCTGCTGTCCTTGTGTCCAGTAATAATGGACAAATACCA
ASCRP002348	0.054095	0.00407	-3.51297	-1.91981	-0.620995	hsa_circRNA_102012	TCACAGTGGGGAAGGCAGCAACAACTCATCTCCAGTGGATTTTGTA
ASCRP003466	0.054095	0.00407	3.51248	-1.92071	1.02138	hsa_circRNA_103165	TGACACTCTGTACTACATGAAGGCCTCCTGCTTGCCCGATGGGACT
ASCRP000272	0.05414	0.00409	-3.50973	-1.92564	-0.89122	hsa_circRNA_001416	GTAGCCCGAGGTCCCTCTCTAATATGAAGAAGCAAGGAACTTTCCA
ASCRP004627	0.055002	0.00417	-3.49901	-1.94489	-0.542709	hsa_circRNA_104365	ACGATGACAAGGAGAACCACTGTCGCCGCATCAAGATTCTCGGGGA
ASCRP003817	0.055261	0.00423	-3.49234	-1.95688	-1.54263	hsa_circRNA_103519	CACCCTTCTCGTTATTCAGGCATTTTTTACTGTCTACAGAAACTTA
ASCRP005350	0.055261	0.00423	-3.49195	-1.95759	-0.711922	hsa_circRNA_400056	GCAGCAGGTGTCTTGCATCTCATATTCTTCAACCCTGTCAGAAGAG
ASCRP003097	0.055313	0.00427	-3.48694	-1.96658	-0.741013	hsa_circRNA_102788	CACCAGCACCGCATTAGATGGCTTCATTATCGCAGTGACAACAGAC
ASCRP003413	0.055313	0.00427	-3.48693	-1.96659	-0.364735	hsa_circRNA_103109	GAGACAGACGATGCACACTTGACTGAAGGAGGACAGGGAATCTGAA
ASCRP000597	0.056421	0.00437	-3.47412	-1.98961	-0.547048	hsa_circRNA_100208	GGCCACACAGAATCTCTACCCTTTGCCGAGGAGCTGAAGTAAACCA
ASCRP004586	0.056855	0.00442	3.4678	-2.00097	0.766324	hsa_circRNA_104323	GATGTTGCTGTTGAGGTGGAAAAATGCTAATCACTGAAAGAAAACA
ASCRP002849	0.057117	0.00446	-3.46313	-2.00937	-0.404244	hsa_circRNA_102536	CCCGAGGCCCATGCTGACCTGACCTTTGACCAGACGGCGTGGGGGG
ASCRP001281	0.057169	0.00449	-3.46009	-2.01484	-0.698846	hsa_circRNA_100908	ATCAGGAGCACAGGCACCCCCTGTAATGGCCTATCCTGCTACTACA
ASCRP003345	0.057169	0.00453	-3.45578	-2.02258	-0.661271	hsa_circRNA_103039	TTTCTTATAACCCTACTCCACGTCTGAAGATTAAGATTGCGGCCCT
ASCRP003875	0.057169	0.00454	-3.45469	-2.02454	-0.573312	hsa_circRNA_103579	AGGATGACTTTACACCTTCGACAACCTGGCATTCATCCCAAGACCC
ASCRP003854	0.057169	0.00454	3.45385	-2.02606	1.24827	hsa_circRNA_103556	AGACTTCACCGGCACCATCAATTTGGTGGAGAACCATTGTCATATA
ASCRP003839	0.057252	0.00459	3.44881	-2.03512	0.905673	hsa_circRNA_103541	TTCTGCTCTGGTTGTGTTGCTTTCTGCCACAATGCCAACTGATGTG
ASCRP000050	0.057252	0.0046	-3.44722	-2.03797	-0.46025	hsa_circRNA_000454	GAGTGGAGAGGCATGAGATTAAGGAGCACATAAGAGGAATATTAGC
ASCRP004062	0.057252	0.00461	-3.44637	-2.0395	-0.547087	hsa_circRNA_103772	TACCCGTACGACCCAACATGAGTGAAGTTTCCTGCAAGAAACGGGA
ASCRP002508	0.057252	0.00462	-3.44441	-2.04301	-0.655756	hsa_circRNA_102179	TCGCCCCAGAGAAAGCCAAACTTGGCCCTGCTGGCAACAAAGTCAT
ASCRP003342	0.057391	0.00467	-3.43887	-2.05298	-0.822491	hsa_circRNA_103036	GTCACAACCAGAACTGTGACTGTAGCCCGCCTCCATTGTGTTCCCT
ASCRP005211	0.057391	0.00468	-3.4383	-2.05402	-0.803118	hsa_circRNA_104964	TAAGATCCTCAACTGCCAAAAGGCAATGGGGGGCGACGATGGCCTT
ASCRP002523	0.057391	0.00469	-3.43673	-2.05684	-1.11881	hsa_circRNA_102195	CCACCCCGAGGTGCCCATTCCTGCACAGAACCACAGGGGACACTGA
ASCRP000504	0.057857	0.00475	-3.43013	-2.0687	-0.497019	hsa_circRNA_100114	TGACACAGATAGAGCCCGAGCCCAGCACATTGTGCCCTGTACTATA
ASCRP005394	0.057857	0.00477	3.4282	-2.07217	0.813225	hsa_circRNA_400101	GTGTGCAGATATGATACATGCTTCTTGCTTTCATTGGGAGTTGCTG
ASCRP000303	0.058336	0.00482	-3.42172	-2.08383	-0.786344	hsa_circRNA_001594	AGCCGCCATCCATCTCTACTACCACATGTTTGAGTTCCCCCAAACT
ASCRP001482	0.058493	0.00486	-3.41819	-2.09016	-0.464062	hsa_circRNA_101115	TGGGAAGACATATCAAGCAAAAGTTCAAACAGACCCTCCCTCAGTT
ASCRP003788	0.058769	0.00493	-3.41023	-2.10448	-0.50757	hsa_circRNA_103490	CACATATGAAAAAGGGTGATTTTACAACGAGATGCTGCTCTCCATA
ASCRP000735	0.058769	0.00493	3.4098	-2.10524	0.482014	hsa_circRNA_100350	CCTAGAGAAGCCTCTGTGTCCAGATGTTTGACTGGTTTGACTACCA
ASCRP005240	0.058769	0.00495	3.40789	-2.10869	0.582961	hsa_circRNA_104993	ATGGCTTAAGCCCCACTGTGTTCTCCTTGCCTCAAAAGAAAACTCG
ASCRP003689	0.058769	0.00496	-3.40741	-2.10955	-0.468113	hsa_circRNA_103391	TGAGCAGAATAAGAAGACCCTTGAAGCCCCAGAAGCACTTTCATTT
ASCRP000767	0.059826	0.00507	-3.39588	-2.13028	-0.458584	hsa_circRNA_100382	ATCCGAGCTGACGCTCTGCTGTTGCCCGTATTCAGGAGTTCTTCAG
ASCRP002736	0.06008	0.00511	-3.39103	-2.13901	-0.901695	hsa_circRNA_102417	CCTCCGCAGACCCGTCTGCCGTTTAAGCGCCTGAATCTTGTCCCAA
ASCRP002173	0.06008	0.00513	-3.38955	-2.14166	-0.534994	hsa_circRNA_101829	CAGTGTAGAAGCAGGGGAAATGGAAGGTGATGCAGTCGAAGCCATT
ASCRP002747	0.060265	0.00517	-3.38502	-2.14982	-0.466507	hsa_circRNA_102428	ACGCATCCTGGTGGAGGAGAAGATCAAGCAGACCCACCGTAAGTAC
ASCRP004442	0.060265	0.00519	-3.38304	-2.15337	-0.843565	hsa_circRNA_104169	AAGCCACCAGCAGAACTTTGCAGAAAACACCATGAATGAACTCCTT
ASCRP002112	0.060265	0.00522	-3.38022	-2.15845	-0.701149	hsa_circRNA_101766	GACGTCCTCATTGTCCTCGGACCCCCGCAGCAAACACAAGTTTAAG
ASCRP004390	0.060265	0.00522	-3.37965	-2.15948	-0.554477	hsa_circRNA_104117	ACGAACACCAGCTTCCCAGGACAGAATTCTGCAGACGTCTTGCTGC
ASCRP004246	0.060265	0.00526	-3.37592	-2.16617	-0.552264	hsa_circRNA_103966	CTAACTATTTCAAAAGTGTTCCATTGGCAAGCTACAATAATGGGGC
ASCRP004689	0.060265	0.00526	-3.37588	-2.16624	-0.998391	hsa_circRNA_104433	TCAAGTGTCGAGATTGCCATCTGCCCCAACAACCATGAGGTGCATA
ASCRP003453	0.060334	0.00528	-3.3733	-2.1709	-0.57658	hsa_circRNA_103152	AGATCTGCAACATGATCGCCCAGAAGGGAAAGTGAAGGACAAAAAA
ASCRP000402	0.063901	0.00562	-3.34081	-2.22932	-0.430181	hsa_circRNA_100012	GGACACACAGGACGCCAGGAAAGCATGTGCAGATGCAACTCTCTCT
ASCRP002851	0.06461	0.0057	-3.33299	-2.24338	-0.866858	hsa_circRNA_102538	TGGCTGGAGATCCCCCACGCACACATTACTCCAACATTGAGGCCAA
ASCRP003070	0.065809	0.00583	3.32127	-2.26447	0.415711	hsa_circRNA_102759	GAAAAAGAAAGCCAAAACTGGACAAGCCAAGGCATCTGTAGCCAAA
ASCRP003637	0.066192	0.00588	-3.31624	-2.27351	-0.60339	hsa_circRNA_103339	TGAAAACCCCATGAAGAGTTATGCCCAGCCAAGTCTTCAGTATATC
ASCRP005143	0.067024	0.00598	3.30767	-2.28892	1.39081	hsa_circRNA_104896	AAGTCTCCTTCAATTGTATTGATGACGACTGTACGGACTCCTTCAC
ASCRP003711	0.067675	0.00606	-3.30061	-2.30162	-0.582752	hsa_circRNA_103413	CCATCCTCAGCGTGAACAACCCCAGAAGGAAAAAGAGTGCTGTTGT
ASCRP005188	0.067878	0.0061	-3.29709	-2.30794	-0.974147	hsa_circRNA_104941	ACTGCTCCAGTTTTGACAGTGACCTGGAAAGCCTGTGCAATGCTTT
ASCRP002644	0.068977	0.00622	3.28666	-2.32671	0.300648	hsa_circRNA_102325	CCCATCACAGATACGGGCAGCTGTATGTTCTCTTCTTGAGGCATCA
ASCRP003310	0.070164	0.00639	-3.27288	-2.35148	-0.437849	hsa_circRNA_103004	CAACACGGAGCATGGAGGCAGTCAGTTGGGCAGATGTACAGAGTCA
ASCRP002069	0.070164	0.00639	-3.27275	-2.35172	-0.553232	hsa_circRNA_101722	GCCCTTTCTGAATCTGGGCCCTTCCGTCCTGGCTGGAGTGGCGGTG
ASCRP002827	0.070164	0.0064	-3.27188	-2.35327	-0.517184	hsa_circRNA_102513	TCCTCCCTGTTCATCATTGCCTCCAAGCGTGTCCGGAGCGGTGACT
ASCRP002045	0.070195	0.00642	-3.26976	-2.35709	-0.679709	hsa_circRNA_101698	GACATCTTCCTGCACATCTCTGAGTCAGCCATGTCATCTGAGCCTC
ASCRP004199	0.070829	0.00653	-3.26139	-2.37213	-0.442984	hsa_circRNA_103919	ATATCTGGCAAGCCGGGTGACAAGGTGTCAGCTTCCTCTGGTGCAA
ASCRP001612	0.070829	0.00653	3.26123	-2.37243	0.364011	hsa_circRNA_101249	CAACTGTCTGGCAATTGCCTTGCCTCCTATTGCAAAGTGGCCTTAT
ASCRP002782	0.072694	0.00672	-3.24558	-2.40057	-1.09297	hsa_circRNA_102465	CCTCCTCAACTGGGTTCAAGTGCTCCACCAAGACCTCCAAGGGCAG
ASCRP001829	0.073284	0.0068	-3.23943	-2.41162	-0.613422	hsa_circRNA_101478	AGCCAGTTATCTCCAAGCCAGAACAGAGGACTCCAAAATCCATTTC
ASCRP001119	0.073294	0.00683	-3.2375	-2.41509	-0.720379	hsa_circRNA_100745	AGCACCAACACCATGATTTTGGAACCAGTACTAGCAGTGGAGGACT
ASCRP004536	0.073679	0.0069	-3.23166	-2.42558	-0.665226	hsa_circRNA_104266	TCAACCCATCAGCGCCCCAGCTGCACGGAACGTCATGAAGGACCAA
ASCRP002648	0.073679	0.00691	-3.23103	-2.42672	-0.383054	hsa_circRNA_102329	ATACAACGACTAGAGAAATCATAGCCCACTAATGAGTTTTGGAGCC
ASCRP000335	0.074162	0.00699	-3.2251	-2.43738	-0.640859	hsa_circRNA_001808	TATTAGACTTAACTGTTAGAGATTTTTAGTGCCAGCCACCACGCCC
ASCRP000584	0.074162	0.007	-3.22389	-2.43954	-0.637169	hsa_circRNA_100195	TAAAAGTCATGAAATCATCGAGTTCCCCATCCTAAAGCTAAATGGC
ASCRP000566	0.074267	0.00704	-3.22131	-2.44417	-0.564799	hsa_circRNA_100177	CCTCTTCCAGGTCCCCGTCTGGGCAACTCACCGGTGCCAAGCATAG
ASCRP004995	0.075465	0.00718	-3.21044	-2.46371	-1.48023	hsa_circRNA_104745	TCTGAAGGAGAAATCATCCTCATCCTTTGATAACTGTGCTTGAACA
ASCRP005112	0.075465	0.0072	3.2092	-2.46594	0.501364	hsa_circRNA_104865	TCATTGTGCTTGGTGTCATCCTTGAAGGATAGAATAAATCAGCTGT
ASCRP002325	0.076073	0.00729	-3.20229	-2.47835	-0.777947	hsa_circRNA_101988	GGTGCTTCAGGCTCCAGTCAGGCCAACACCGACGCGCAGCTGGGAG
ASCRP001375	0.076073	0.00731	-3.20135	-2.48005	-0.914027	hsa_circRNA_101004	CCAGGGAGAGGTCCCATCCATGGGGGGGCGGAAGCGGGAGCGCAAG
ASCRP000346	0.076857	0.00741	-3.19408	-2.49311	-0.602069	hsa_circRNA_001882	GAAGAGGCAGGCATAAATGAGACATTTTTGAGAGTTGGTAAGAGTT
ASCRP002454	0.076857	0.00743	3.19233	-2.49625	0.58345	hsa_circRNA_102122	ATCTACTTCCTCTGGCAGGTCCTGGGTGTCCTGCTGTGGTGCGTCT
ASCRP004098	0.07709	0.00749	-3.18821	-2.50365	-1.50698	hsa_circRNA_103808	ATGACCCAACTCCCTCGAGCATGCAATGATGCTACCTGTTCTGACC
ASCRP003859	0.07709	0.00753	3.18564	-2.50826	0.345505	hsa_circRNA_103561	TGTCTTTCTGCTGCATCCAGATCTCATTATGCATCAGAAAAATGAA
ASCRP005142	0.07709	0.00755	3.1837	-2.51175	1.04491	hsa_circRNA_104895	AATAGGAAATTCGTAGACATATGACGACTGTACGGACTCCTTCACG
ASCRP003077	0.07709	0.00758	3.1821	-2.51463	0.416105	hsa_circRNA_102766	TCTGTTCTGTATGCTGCATCCCCTTTTTGGAATTGCTCAACCAGGT
ASCRP000657	0.07709	0.00759	-3.18117	-2.51629	-2.25597	hsa_circRNA_100269	CCCCGATGCCTTCAAAATTATGACTCAAAGATATGAAGATCAATGA
ASCRP000817	0.07709	0.00765	-3.17733	-2.52318	-0.283779	hsa_circRNA_100434	TGCAAACCAGGGACCCAAGAGAGCCTAGCAGAGAAGGAGCTCCAGC
ASCRP005154	0.07709	0.00767	3.17549	-2.52649	1.13322	hsa_circRNA_104907	AAGGATGGAGGTGTGTTCCAGAGAACAAGCCTTCAGACATTTGCTA
ASCRP003405	0.07709	0.0077	-3.17393	-2.5293	-0.500219	hsa_circRNA_103101	AAATAATGAAAACCTACTCCGCTAGCAATCGCATCATCGGTGCCAA
ASCRP002557	0.07709	0.00776	3.16949	-2.53726	0.301611	hsa_circRNA_102229	CCCTCTAGAGGCATGGCGATTTGTTGTTCCTGTTTCCCTCGAGCCT
ASCRP004363	0.07709	0.00778	-3.16797	-2.54	-0.718774	hsa_circRNA_104090	GTGACAAAGACGAGCATTACCGCTTCCCAAGCTCTTCCTTCAGTCC
ASCRP001947	0.07709	0.00779	-3.16728	-2.54123	-0.402282	hsa_circRNA_101597	CTGTAAAGAGCATCGACACCCCAGGAGTGATTAGTCGTGTGTCCCA
ASCRP002768	0.07709	0.00782	-3.16567	-2.54413	-0.542266	hsa_circRNA_102449	CGTCTTTGAGCTTCATGTACTGGACTGACTGGGGAACTCCCGCCAA
ASCRP004584	0.07709	0.00783	3.16506	-2.54521	0.425243	hsa_circRNA_104321	CAGTATGTCATATGGATGGTCAAAAGAAATAGACTGGCAACCTTAT
ASCRP004279	0.07709	0.00783	-3.16477	-2.54574	-1.60612	hsa_circRNA_103999	CTTAAGACCTCCCCATGTTATAGTACATTGTGCAGCAGAGAGAAGA
ASCRP000641	0.07709	0.00783	-3.16462	-2.54602	-0.433772	hsa_circRNA_100253	TCAACTGTCACCGGAGCCCCTGGTAGCAAATGATATCCTCAACCAC
ASCRP002389	0.077255	0.00787	-3.16179	-2.5511	-0.62096	hsa_circRNA_102054	AAGAATGCTGCCGCAGGAATGGTGGACTCATCTTTGGTTAAATGAA
ASCRP000776	0.078689	0.00805	-3.15035	-2.57162	-0.463598	hsa_circRNA_100391	GTCCCTTCCGCTCAAATCCCAGCCTTCTATATGGACACAAGTCATT
ASCRP000155	0.078931	0.0081	-3.14704	-2.57757	-0.43855	hsa_circRNA_000931	TAAATGAGTCTGGGGGGAGACCCCCCAAGATTTAGAGGCCAGCAAG
ASCRP003392	0.080078	0.00824	-3.13772	-2.5943	-0.362931	hsa_circRNA_103088	ACAGCACGAGGTGCTGCGAGTGGCTGAGATGCTGCGGTGGAGGGGA
ASCRP001131	0.080152	0.00827	-3.13556	-2.59817	-0.607789	hsa_circRNA_100757	AGGCAGCAAGATTTCACACCCTTTGGAGAGTTTCTTTCTTGGATAA
ASCRP002720	0.080913	0.00838	-3.12888	-2.61015	-0.294072	hsa_circRNA_102401	GGAGCACGAGAGGAGCCCAAGGTGGGCATCAAGACCATCAAGGTGT
ASCRP004647	0.081336	0.00845	-3.12445	-2.6181	-0.394665	hsa_circRNA_104387	TTCTCTCCCCATCAGAGGAGCTGAAGGTCCCCCTAGAGGAGTATGT
ASCRP000526	0.081493	0.00849	3.12177	-2.6229	1.28178	hsa_circRNA_100136	TAACATTCATGCAGAACATCAGGTGTTGGTGGAATGAGCGTTGCAT
ASCRP002759	0.082097	0.00858	3.11621	-2.63287	0.493565	hsa_circRNA_102440	TAAGACCTTCAACTTGATCCCGGCTGTTGGAGGTGTTGCCCATGGC
ASCRP000965	0.083313	0.00874	-3.10677	-2.6498	-0.471359	hsa_circRNA_100588	CTGCTGAGAGGGCTTAGGAACCAAGGAGGGTGTCATCATTGAGATC
ASCRP002894	0.083885	0.00883	-3.10114	-2.6599	-1.09934	hsa_circRNA_102581	TCCCCATCACGGTCGGCTACCAGATCCGCTTTGAGAGCACACGTTC
ASCRP004120	0.083885	0.00888	-3.09795	-2.66563	-0.398226	hsa_circRNA_103830	TCACACAAGATGCTACACCGGCTCTTTCACCATGCCTGGATCACTT
ASCRP001805	0.083885	0.0089	3.09677	-2.66773	1.34281	hsa_circRNA_101448	CCGGCCATAGGGAGGCGCCACATCCACCACCTGGGGAACCAGCTGC
ASCRP001049	0.083885	0.0089	3.09661	-2.66802	0.605642	hsa_circRNA_100675	ACTTATTCCAGGCACAGCTTTGGTCCCCTATGGTCTTCCCTGCATC
ASCRP003476	0.084087	0.00895	-3.09371	-2.67322	-0.560028	hsa_circRNA_103177	CAAGGGGCAGTGCAGGCCAAGGCCCCCTGCCCATGGAGGTGTGCTG
ASCRP003653	0.08431	0.009	-3.09069	-2.67863	-0.580026	hsa_circRNA_103355	TCATCCACCCCAGCCAGAAGGAGCTGAAGAGGAAAAAATGGAAGCC
ASCRP004094	0.0846	0.00906	3.08726	-2.68477	1.12764	hsa_circRNA_103804	TATGCTGGAGAGAAACTTGGCCTCCTAGCCCTTATCAATGAAGAAA
ASCRP003116	0.084752	0.00911	3.08471	-2.68936	0.380192	hsa_circRNA_102807	AGGATCAATGCTGGCTTCCACGTTTGCTAATCCAGACTTTACACAA
ASCRP000275	0.085155	0.00918	3.08027	-2.69731	0.345362	hsa_circRNA_001430	TCACACATAGGAGACGGGTTTGGCTCTGTGATTCATCAGAAATAAG
ASCRP002243	0.085155	0.00921	-3.07899	-2.6996	-0.595453	hsa_circRNA_101901	GGCATCCGGTGTGACCAAAAGCCAGCCCCACTGTGAGTTGAACTCT
ASCRP004513	0.085495	0.00929	3.0743	-2.70801	0.318877	hsa_circRNA_104242	CCAATGCCACAGGAAAGAGGATCTGTCTGGCTCCATTGATGACCTC
ASCRP004966	0.085495	0.00931	-3.07277	-2.71074	-0.307641	hsa_circRNA_104715	TACCATGACATCAAGCAGGCCTTCCGGAGCAGTACTACAGCCTCAC
ASCRP000405	0.085495	0.00933	-3.07178	-2.71252	-0.398753	hsa_circRNA_100015	CACCAACAAGGACGCCAGGAAAGCATGTGCAGATGCAACTCTCTCT
ASCRP002578	0.085495	0.00935	-3.07054	-2.71475	-0.432562	hsa_circRNA_102250	AAGGTGGCAGCATGGAGAATGGATGATGAACTTGTTGTTGGACATA
ASCRP002740	0.085998	0.00944	-3.06585	-2.72313	-1.04311	hsa_circRNA_102421	ACTTTGGGGAGCCTAAGTCCTGGAACCATCACTGTTGCTGGAGGCA
ASCRP005178	0.086616	0.00957	-3.05869	-2.73596	-0.671563	hsa_circRNA_104931	GCGATTTCCGGATGAAACTGATTCCAAGACAGCCTCCCCGTGGAAG
ASCRP003947	0.086616	0.00959	-3.05744	-2.73819	-0.376364	hsa_circRNA_103653	GGCAATCAAGGGGTGGCACTGAATCAACAAGACAAGCAACTCAATT
ASCRP000404	0.086616	0.0096	-3.05697	-2.73903	-0.377729	hsa_circRNA_100014	GGCAGGACACACAGACAAATTTACATGTATTGGAGACCAGACCAGA
ASCRP005355	0.086616	0.00963	-3.05519	-2.74223	-0.623373	hsa_circRNA_400061	TAGAAACCACCTAGAAACTTTCCTGCCACCAATGATTTACACAGTG
ASCRP003232	0.086616	0.00965	3.05426	-2.74389	0.574818	hsa_circRNA_102924	TTCCGGTGTGGTCGTCCTTGGTGGAAGGAACCATGAACTGGCATCT
ASCRP000907	0.087313	0.00976	-3.04798	-2.75514	-0.328996	hsa_circRNA_100526	CCACCAGCAAGTACGTAGAGAAATCGACACTCTTAATGAACGTTTA
ASCRP000412	0.087313	0.00978	-3.04692	-2.75702	-0.382564	hsa_circRNA_100022	GAGTGGACGGCAATAAAACAGACACATGACCCTCATTGAGAACTGC
ASCRP000370	0.088483	0.00994	3.03834	-2.77239	0.773743	hsa_circRNA_002039	TTCAGAATGAAGAGAGATGAGGTCTCACTGTTTTTCCCAGGCTGAA
ASCRP000081	0.08963	0.0101	3.02998	-2.78734	0.360672	hsa_circRNA_000621	CAGGATCATGCTTGGAGCATCGTGGCATTCCTGGTGGCTTTCCATC
ASCRP001892	0.092285	0.0104	-3.01299	-2.81773	-0.992561	hsa_circRNA_101541	AGCTAAAAGCTTCCATGAAGCACTCTACACCCCCAAGTGCATATGG
ASCRP002469	0.092659	0.0105	-3.00901	-2.82484	-0.439495	hsa_circRNA_102137	GTCTGCACAAGGTCCACATATAGCCTCAGTTACATTAGCTGCTTAT
ASCRP002795	0.092659	0.0105	-3.00732	-2.82786	-0.446342	hsa_circRNA_102478	AGGAGAGCAAGCCATCACTGCCCGCGACTCCATGGCCAAGTCTCTG
ASCRP000124	0.092659	0.0106	-3.00628	-2.82972	-0.666674	hsa_circRNA_000799	GAAGACAGAACCCCGAATTAATACCAATAGAAGGGCAATGCTTTTA
ASCRP003650	0.093801	0.0107	2.99726	-2.84583	0.476892	hsa_circRNA_103352	GCCTGAGTGGGTACCTGCACATGTTGTTCTTTGTCAGTGCTGTCAA
ASCRP002366	0.093801	0.0108	2.99677	-2.84671	0.393861	hsa_circRNA_102031	CTTGTGTGCAGTTTCTCTATAACAACAATACAAGGCAACAAACTGA
ASCRP002058	0.094362	0.0109	2.99174	-2.8557	0.55411	hsa_circRNA_101711	ATGTGTTTTCCCCAGCATTCCATGGACTTTTTGCTATTTCAGTTTG
ASCRP003256	0.094362	0.0109	-2.99061	-2.85771	-0.659228	hsa_circRNA_102949	TGAATGTGGAGAGGGTCTTCCAGGACGATGCCTTCGTGAACAGCCA
ASCRP003355	0.094377	0.0109	-2.98903	-2.86054	-0.675508	hsa_circRNA_103050	AACCTGTCAGTGCTGCAAGTTTACCCAAGGTCCAGCCTAGCCCCTA
ASCRP002758	0.094397	0.0109	-2.98743	-2.8634	-0.506343	hsa_circRNA_102439	CAAAGACCAGCTGAACCTTCACCTAGCCCCAGGATTACAAGGAAAA
ASCRP004527	0.094918	0.011	-2.98302	-2.87126	-1.0225	hsa_circRNA_104256	TTTTAGACACAGCTCTCCAAATCCCAGAATGATATGACTTCTGAGA
ASCRP002719	0.096303	0.0113	-2.97213	-2.89071	-0.374947	hsa_circRNA_102400	AGATGGGCACGAACAAGTGTGCCAGCCAGGCCAAGACTAAGGGGCT
ASCRP003430	0.096303	0.0113	2.97147	-2.89189	0.360864	hsa_circRNA_103126	ACAATCACAGTACTTTACCTCGTGTGGGCCTTTATTCCTGAATCTT
ASCRP002574	0.096303	0.0113	-2.97091	-2.89288	-0.35761	hsa_circRNA_102246	AGGTGGCAGCATGGAGTAATAATGGACAAATACCAGGAGCAGCCTC
ASCRP001632	0.097001	0.0114	2.96561	-2.90233	0.405984	hsa_circRNA_101271	TTCCGGAAAAGCCTCCATTTGCTGTTTGGGAAACTCTCTACGCTAT
ASCRP004400	0.097552	0.0115	-2.96071	-2.91107	-1.08829	hsa_circRNA_104127	CTCACTGCCCATTTCAGGAGAATATTAAACGTAAAGACCATATTGA
ASCRP000441	0.097552	0.0115	2.95913	-2.9139	1.27824	hsa_circRNA_100051	CAGCTCCGAGCATCCAGAGATACGCTGTCATCCCTTTATCGACCAA
ASCRP002667	0.097552	0.0116	2.95708	-2.91756	0.477542	hsa_circRNA_102348	TTCAAAAACTTTTCAGAAAGTGCTTTCTCTCTGTGGACATGAGGAT
ASCRP002114	0.097552	0.0116	-2.95677	-2.9181	-0.455606	hsa_circRNA_101768	GAAAGGCAGCTTTGGCAAGGACCCCCGCAGCAAACACAAGTTTAAG
ASCRP001197	0.097686	0.0117	-2.95343	-2.92407	-0.620803	hsa_circRNA_100823	GGTGCAGAAGTGAAGCCCAAGAGCCAAAGGAATCACCACCACCTTC
ASCRP004267	0.097686	0.0117	2.95181	-2.92696	0.523719	hsa_circRNA_103987	ATCAAGCAGAGTGTGCAGCAATGACAACAAGACCTTCGACTCTTCC
ASCRP003906	0.097686	0.0117	2.95156	-2.9274	0.65286	hsa_circRNA_103611	TCTGCCAAGCATGCCCTAACCATTTCTAATATTCAGGCTGGATCTA
ASCRP004639	0.097686	0.0117	-2.95027	-2.9297	-0.302049	hsa_circRNA_104377	GAAGGAAGAGCTACTCTCAGAACCGCACGTTTGACACGTACATTGG
ASCRP002697	0.098206	0.0118	-2.94602	-2.93728	-0.433072	hsa_circRNA_102378	GGAAGGAGCACGGGAAGAAGACTTGCACTATCTGCCAGATGCTGCT
ASCRP000807	0.098345	0.0119	-2.94301	-2.94265	-0.308893	hsa_circRNA_100424	TCACTACCGGACCCAGAGTCCCAGAGAAAGAGGACAGTGCAGAATG
ASCRP003266	0.098345	0.012	-2.94014	-2.94776	-0.341826	hsa_circRNA_102959	CCCAGCACGGGTTCATCTGCAGAAGCCAGCGGACGCCTCTGTTCAA
ASCRP001009	0.098345	0.012	2.93975	-2.94845	0.71194	hsa_circRNA_100635	TTCAGAAAGCTGGTGTGCTGTCCGACCTCACCAAAGTGACCCGGAT
ASCRP002541	0.098345	0.012	-2.93957	-2.94878	-0.664994	hsa_circRNA_102213	GCTGTGCCAAGCCACCAGGGAAGCTTCTGCATGCTGTGTGTCATGC
ASCRP004018	0.098693	0.0121	2.93485	-2.95718	0.582522	hsa_circRNA_103727	GTCGTTAGCGGTTGTTGGTGTAGCCCAGGCCATCAACAAGAAATCA
ASCRP001083	0.098693	0.0121	-2.93417	-2.9584	-0.534628	hsa_circRNA_100709	GATGGCACAGCACACGCCAAAGAAGATGAGTCAAGGACCTACACTT
ASCRP001676	0.098693	0.0121	-2.93346	-2.95966	-0.836109	hsa_circRNA_101317	CACTTGCCACTGGGATGAGCAACAAAGGAAAGAAGTTAAAAAGGAT
ASCRP000085	0.098815	0.0122	2.92975	-2.96628	0.559729	hsa_circRNA_000629	AGGCCTCTTCCTTTCTTCCTTTCTCAGATACATCCCGGCCTCAGCT
ASCRP001227	0.098815	0.0122	-2.92972	-2.96633	-0.456456	hsa_circRNA_100853	GTGACAAGGCCCTGCTCAATGTCATCCACACCCCGATGAGCCTTCC
ASCRP002420	0.098815	0.0122	2.9286	-2.96832	0.30202	hsa_circRNA_102085	AACAGACAGCCAGAATGGATAAACAAGCCCTTGCAGATCAGAAGAA
ASCRP004078	0.09935	0.0123	2.92435	-2.97589	0.538879	hsa_circRNA_103788	ATCACTAGTTTTTCTGGCCGCATCTACAAGTGCTTGTTTACTGGCT
ASCRP004003	0.10067	0.0125	-2.91495	-2.99261	-0.895202	hsa_circRNA_103710	AAGTTTCATGAGAATGTAACTGGTCACTACATTTCCCCCTTTCATG
ASCRP004978	0.10067	0.0126	-2.91355	-2.99511	-0.350197	hsa_circRNA_104728	CCCAGCGACAAGACCATCATGCAGACATCAGAGACTGGGTCGGACA
ASCRP002900	0.10067	0.0126	2.91319	-2.99576	0.379538	hsa_circRNA_102587	CGTCGCACAGAAGCCTGCCCTGGACTGCTCACAGGTCTCCCCGCCC
ASCRP004830	0.100752	0.0127	-2.90993	-3.00155	-0.445914	hsa_circRNA_104577	CCCCATCATGGAGAGCAAGCCCTGGAGGTTCACTCTTTCAAGAAGT
ASCRP003971	0.100752	0.0127	2.90918	-3.00288	0.621513	hsa_circRNA_103677	TTGCTTAATAAGTGGATTCTCCACAGTTTTCCTCGTGCGTACTCAC
ASCRP002373	0.100752	0.0127	2.90862	-3.00388	0.290461	hsa_circRNA_102038	GGCTTTTCAGCTATATGTCTTTGGCTTTCAAGATCTTCTTTCCACA
ASCRP004613	0.101314	0.0128	-2.9043	-3.01156	-1.50014	hsa_circRNA_104351	CCCCACTACCAGGATGAAAGTCCTGGACAGACTTATCACAGAGAGA
ASCRP003978	0.10149	0.0129	-2.90149	-3.01658	-1.463	hsa_circRNA_103684	GACTCACCAGGTTACAAGAACAGCCAATCGTCCAATAGCCGCTGGA
ASCRP002664	0.10149	0.0129	2.89941	-3.02027	0.415308	hsa_circRNA_102345	AGAATTTGTGTTCTTCTGGTCATCCTACTTTTAAGTGTCCCCTGTG
ASCRP003550	0.10149	0.0129	-2.8993	-3.02046	-0.585941	hsa_circRNA_103252	GGAGCCTCCTGATGATGAGCTTTTCGCTGTGGCCTGCAGTTTTTAG
ASCRP003846	0.101783	0.013	-2.89642	-3.02559	-1.11765	hsa_circRNA_103548	CCCCATGTGGTTTCGTAGAAACCCCAGCTCATTTCTCTTGGAAAGA
ASCRP002687	0.102693	0.0132	2.88918	-3.03845	0.264578	hsa_circRNA_102368	GTGTGCGCAGAACACTCGTGAAACTGCTCAGGCCATCAAGGGTATG
ASCRP001667	0.102693	0.0132	2.88899	-3.03879	2.35255	hsa_circRNA_101308	GTTTTCTTCGCCTCCATAGGTGTGGAAGATTTCCTTACAAGGGCCG
ASCRP002641	0.103407	0.0133	-2.88386	-3.04791	-0.432102	hsa_circRNA_102322	TTGATGCGATCCTGACCAGTGCAACCACGGGATGTGCCCTCCTCCT
ASCRP003766	0.103407	0.0134	2.88169	-3.05176	0.475437	hsa_circRNA_103468	GTCTTCCTTGCCTAACAAAAGACATGACTGGGAAAGAAGACAACTA
ASCRP003970	0.103407	0.0134	2.88123	-3.05259	0.65755	hsa_circRNA_103676	AACCTCGTGGGATACTGTGCTGTCTGCCATGAGTCCTGTGCAGGTT
ASCRP004576	0.103407	0.0134	-2.87854	-3.05737	-0.778156	hsa_circRNA_104313	TTCTTCATCTTCCAAGAGAACCAGAGGACGAAAACGAAGCTTCGTT
ASCRP005275	0.103407	0.0135	-2.87674	-3.06056	-0.374106	hsa_circRNA_105028	AGGGCGCGGCAGTATCCTTGGGGCACTGTGCAGGCTACAAGCCTAT
ASCRP004438	0.103407	0.0135	-2.87616	-3.06159	-1.24014	hsa_circRNA_104165	TCCTCTCTTCGTCACCATTATTGCAGATGATAACTGCAGATTTTTA
ASCRP000578	0.103407	0.0135	-2.87504	-3.06359	-0.427124	hsa_circRNA_100189	TTCAGCACAGGATTCGAGGCACAAACCCAGCAGCCTCAACCTAGTT
ASCRP003327	0.103407	0.0135	-2.87465	-3.06427	-0.607734	hsa_circRNA_103021	ACCCAACAACACGCAACCAGGTCTCTGCAGACAAACTGGTGGCACT
ASCRP002743	0.104362	0.0137	-2.86839	-3.07539	-0.755815	hsa_circRNA_102424	TTTGGGGAGCCTAAGTCCTGATCATCCCCCCGAAGGAGTGGAAGCC
ASCRP002396	0.104362	0.0137	-2.8665	-3.07874	-0.265747	hsa_circRNA_102061	GCATCTCCCATCATTTTGCATGAGAATAATGGTCATTTAATGAACC
ASCRP002705	0.104362	0.0138	-2.86562	-3.08031	-0.710369	hsa_circRNA_102386	GAGCACAGAGGGGGACAGCCGCGCCGCTGCTGCTTTTCCGAAGAGG
ASCRP003241	0.104362	0.0138	-2.86331	-3.08441	-0.424658	hsa_circRNA_102934	AGGAGCAACAGGTATGTCCCGCCAGAACAAGCCAAAGTCGTGGCAT
ASCRP000069	0.104362	0.0138	-2.86321	-3.08458	-0.45774	hsa_circRNA_000578	AGACGGGGCTGAGGGGGGAGGGTTGGAGTTTGCGCATGCGTAAAAA
ASCRP001911	0.104531	0.0139	-2.85934	-3.09146	-0.340111	hsa_circRNA_101560	GATTCAGCAGTGCTTGGTCCATCCTACTAGATCGCTCCCAGACTCG
ASCRP003563	0.104531	0.0139	-2.85911	-3.09187	-0.454951	hsa_circRNA_103265	CACCTACCAGGACAACTACACCTTTGCCCAACCTGGGATTCAAATG
ASCRP001201	0.104531	0.014	2.85845	-3.09303	0.534383	hsa_circRNA_100827	TTGTGTTCCAGGCTGTTTTCACAGTGGTGTCGTCCGAGCTGAAGGG
ASCRP001328	0.104937	0.014	-2.8551	-3.09897	-0.792251	hsa_circRNA_100956	AACAGCAGCATCAAACAGCTGCAGCAGGAGCAGTCTCTCCTACAGC
ASCRP000175	0.105082	0.0141	2.85238	-3.1038	0.349345	hsa_circRNA_001012	GGCTGCCAAGATTGGGGGTCCTCAGGGTCTCCATCCTGGCTGCCGA
ASCRP001609	0.105082	0.0141	2.8518	-3.10484	0.29075	hsa_circRNA_101246	GAATGATCGGAGCCTTGCTTCCTGTTTTACATCACAAATCTAAAAA
ASCRP003008	0.105514	0.0142	-2.84833	-3.11098	-0.320989	hsa_circRNA_102696	AATTACAGTGGAGGCAGGTGGAAGTCATCATAAAGTTTCTGTTTCA
ASCRP002983	0.105632	0.0143	-2.84646	-3.11431	-0.507941	hsa_circRNA_102670	TCTCTTGCAAGTACAATCACATCTAGCAGTCCTACTGCCCAACCAG
ASCRP001679	0.106247	0.0144	2.84187	-3.12244	1.44974	hsa_circRNA_101320	ATCTTCCGGCTCCTCAAGTTCTGGATGCGGGTACCCTTGGTGGCAC
ASCRP001149	0.106247	0.0145	-2.83933	-3.12694	-0.693214	hsa_circRNA_100775	ATACGGTGCACCTTGGGTCGACCCCATCCCATATGACACTCCAAAA
ASCRP001890	0.106247	0.0145	-2.83891	-3.12768	-1.10988	hsa_circRNA_101539	TGATGGTTGCCCTGGCAAAGCACTCTACACCCCCAAGTGCATATGG
ASCRP003235	0.106247	0.0145	-2.83741	-3.13034	-0.897915	hsa_circRNA_102928	TTACAAGCCAGCCTCTGGGACCGAGGTTCAGCCGTCTGTATATCTC
ASCRP005217	0.106247	0.0146	-2.83629	-3.13233	-0.598943	hsa_circRNA_104970	GGGAGGACGGGCCTGCGGCTGCCCCCTCTACTGGAAGGGGCCGCTC
ASCRP001728	0.106247	0.0146	2.83575	-3.13329	1.08119	hsa_circRNA_101369	AACATTCTCAGAGCCAATTCCAGACTCCATCATTTCTCGTGGTGTT
ASCRP000478	0.106975	0.0147	-2.82972	-3.14397	-0.483303	hsa_circRNA_100088	TCTACAGCACGCAATCCCACAGAGTATTGATGAGGAAACTGAAGTT
ASCRP003646	0.106975	0.0147	-2.82961	-3.14417	-0.616801	hsa_circRNA_103348	TCAATGGCGGCTACCCACTGCTGAAACTCCCCTTGCCAGGAACAGG
ASCRP005259	0.107441	0.0148	-2.82548	-3.15147	-0.25967	hsa_circRNA_105012	AACATCAAAGGGCAAAACATCAGAGGCTCTTGCAAAGTTAATTTCA
ASCRP004032	0.107441	0.0149	-2.82406	-3.154	-0.415781	hsa_circRNA_103741	AGCAACAGCAGCTCCAAGTGGAAGCATCAGTTCACAGCAGTAATGC
ASCRP003152	0.107441	0.0149	-2.82244	-3.15686	-0.58163	hsa_circRNA_102844	TTCCTCTCTGACCCCCTGGTTGTGGAATACGAGGCATTGCTGGTAC
ASCRP000879	0.107441	0.015	-2.82123	-3.159	-0.285549	hsa_circRNA_100497	CGGGCGAACCTGCTATGTTTTCAGCTATAACACGGATTCCCGCCAG
ASCRP003126	0.107441	0.015	-2.82106	-3.15931	-0.802108	hsa_circRNA_102817	TCACCAGTTCCGTGTCCACTATCCGACAGTATCCAGCCAAGGTGGT
ASCRP004771	0.10812	0.0151	-2.81637	-3.16761	-0.422233	hsa_circRNA_104517	CGCGGGACTAGGGAGAATAATCATGGGCCAGACTGGGAAGAAATCT
ASCRP002505	0.10812	0.0151	-2.81523	-3.16962	-0.471972	hsa_circRNA_102173	TTTGACACCACAATCAGGCTGCTCCCGGCAGATCGGCTTCTCCTTT
ASCRP003855	0.108841	0.0153	2.80958	-3.17962	0.666874	hsa_circRNA_103557	CTTTTTCTTGATTGGTTCTTCTGTGTGGCAGTTCAGAATGATGGAT
ASCRP002367	0.108841	0.0153	-2.80923	-3.18023	-0.358411	hsa_circRNA_102032	AAAGACAGCAGCTAGAGTTGGGAAGACATCACTGATTATGTCTCTG
ASCRP003627	0.108906	0.0154	2.80768	-3.18297	0.405969	hsa_circRNA_103329	TTGGCCTCAGCTCTTGAGGATCTTGCTTGTCCAAACCCAGAAGACA
ASCRP005307	0.11016	0.0156	2.80038	-3.19589	1.17592	hsa_circRNA_400011	CGAGCCCCGCGTGAGTCGGCCTGCGGACTCTTCCGGCCCGAACTTC
ASCRP005381	0.110435	0.0156	-2.79783	-3.2004	-0.549887	hsa_circRNA_400087	GAGGAACCGGCAGGCGTTTCCTCCCGGGCCCACCCTGCGCGCGCCG
ASCRP003468	0.110723	0.0157	-2.79522	-3.20501	-0.540616	hsa_circRNA_103167	ACCGACCAAGGACAACCCTCCATATGATAAGGGAGCCTTCAGAATC
ASCRP003305	0.112274	0.016	2.78661	-3.22022	0.480345	hsa_circRNA_102999	CTGCAAAAGAAGCTGAGATCTGTATCTGTGGACCTGAATGTTGATC
ASCRP004636	0.11232	0.016	-2.78517	-3.22276	-0.891854	hsa_circRNA_104374	GCCGCCGCAAAGCAGATATTCTGGAGGAAGGTGTGAACGCAACTTT
ASCRP003559	0.11232	0.0161	-2.78396	-3.2249	-0.228479	hsa_circRNA_103261	TTGATCCTGCAGCCCAAGGTGACGGAGAGGAATTACGGAGGTTGAG
ASCRP003013	0.112881	0.0162	-2.77912	-3.23344	-0.511259	hsa_circRNA_102701	AAGAAAGCAAAAGGAGCAGAAATAAAGCCTCTACAACCCCACGTCA
ASCRP005141	0.112881	0.0162	-2.77889	-3.23384	-0.447934	hsa_circRNA_104894	TGGAGCCCTCGTGAAGCAGAAGATGACGACTGTACGGACTCCTTCA
ASCRP003216	0.112909	0.0163	2.77651	-3.23805	0.435431	hsa_circRNA_102908	GCCTCCAGAAATGCTGTATTTGAAAGAAGATAAACCTAGGAAAAGT
ASCRP003037	0.112909	0.0163	-2.77636	-3.23832	-0.285591	hsa_circRNA_102725	TCCTGGACACCTCAGGGAAGAGACTTCCACCTTAGGATAGTGTTGC
ASCRP001713	0.112974	0.0163	-2.77485	-3.24098	-0.37384	hsa_circRNA_101354	TACCCTTCAATTATGCCCCGTGGTGCCCTGCTTGTCAAAATCTTCA
ASCRP000499	0.113028	0.0164	2.7734	-3.24354	0.329538	hsa_circRNA_100109	CAGCTTGCCTCCATCCAGTCCAATGGATCAGATGGGCAAGATGAGA
ASCRP004514	0.113138	0.0164	2.77169	-3.24656	0.323436	hsa_circRNA_104243	AGCCAGTATGGACCACAAGGATCTGTCTGGCTCCATTGATGACCTC
ASCRP000310	0.113192	0.0165	2.77024	-3.24911	1.68271	hsa_circRNA_001653	ACTTGTGTGTGGGTGACTAAGTGGATGCATGTGTGCCCCTGCACTC
ASCRP002606	0.113454	0.0166	-2.76782	-3.25338	-0.396782	hsa_circRNA_102287	ACCTGAATCACATCGAGCCACTGAAAATTCAGATCTTCCTCTGATG
ASCRP004942	0.113884	0.0167	-2.76428	-3.25962	-0.482265	hsa_circRNA_104690	CTCACATGCCACATACAAAAATTGAGAAAGAGAAAAGAGAGCACGC
ASCRP000347	0.113884	0.0168	-2.76136	-3.26478	-0.607794	hsa_circRNA_001886	AGGGCTTCTGTCAGGCCCCACCGTGGACATGCCGGTTCCCTCCAGC
ASCRP004247	0.113884	0.0168	-2.76096	-3.26548	-0.409823	hsa_circRNA_103967	AAACAGATAGAGAAAATGTTCCATTGGCAAGCTACAATAATGGGGC
ASCRP000410	0.113884	0.0168	2.76045	-3.26637	0.277712	hsa_circRNA_100020	AAGGAACGTACGCCAGGTTGCTTTGGTTGCCATAAATATCATTGGA
ASCRP002276	0.113884	0.0168	-2.7599	-3.26734	-0.282656	hsa_circRNA_101935	ACCAGGGCAGGAATCTCTGTCAGCAGCCTGAGCGACAGTCTTTTTG
ASCRP004571	0.113935	0.0169	2.7581	-3.27053	0.337289	hsa_circRNA_104307	TCTGCCATGCCCCAGGGAGCTCCCAGGAACGATTTGTAACCCTGGA
ASCRP002507	0.113935	0.0169	-2.75732	-3.2719	-0.436384	hsa_circRNA_102178	CATGTCACAGGACCCCAGGAGCAAGCACAAGTTCAAAATCCACACT
ASCRP003789	0.114193	0.017	-2.75249	-3.2804	-0.41193	hsa_circRNA_103491	ATAGTCATTTTCATGGTGATTTTACAACGAGATGCTGCTCTCCATA
ASCRP003745	0.114193	0.0171	2.75016	-3.28451	0.46773	hsa_circRNA_103447	TGGACTGTGGGTGGTCCTGCCATCATGGCTGTCCTCTGCAAAGGTC
ASCRP003263	0.114193	0.0171	-2.75011	-3.2846	-1.14276	hsa_circRNA_102956	ACCCCCAATGACAGTACTCGGGTTTCATATTTTGCTGTTTTTGATG
ASCRP005353	0.114193	0.0171	-2.74991	-3.28496	-1.25552	hsa_circRNA_400059	GCCCTCCTGCGCTGTCGAAATGTGAAGCATGTAGAACGTGAAGTGC
ASCRP001067	0.114193	0.0171	2.74963	-3.28545	0.369538	hsa_circRNA_100693	GAAGGTTCTGGTCTTGCACTAAGGTTCCTCATGCCATGCACCTGCT
ASCRP003755	0.114193	0.0171	2.74915	-3.2863	0.453145	hsa_circRNA_103457	ATCATCGAGGGGCTCTGGTCTACTCTCTGGTGGTCATCCTTCCCAA
ASCRP004331	0.114197	0.0172	-2.74797	-3.28837	-0.365923	hsa_circRNA_104057	TGGGAACATGCACAGGAAACGAAAGAGGAGAAGTCTTCCTATAACT
ASCRP004332	0.114209	0.0172	-2.74676	-3.29049	-0.776943	hsa_circRNA_104058	CAGCCCTCAGACTCAATAAACTAGAGCGCTTTCAAAATTTGGTTCT
ASCRP002285	0.114577	0.0173	2.7439	-3.29553	0.338261	hsa_circRNA_101944	TCCCAGCTGAAAGCTGAACAAAAGGTTCATCCTCAGTTTTCTCCAT
ASCRP003557	0.114661	0.0174	-2.74237	-3.29824	-0.512311	hsa_circRNA_103259	ACGGACCTTGCATCCAGCACGTGTATGGTGCCCAGCACCCCCCCTT
ASCRP000096	0.114694	0.0174	-2.74107	-3.30051	-0.785093	hsa_circRNA_000676	GGCCCCAGAACTGTCCCATTCCTTTAAGGTACGAGCAGTCTACACA
ASCRP004209	0.115345	0.0175	2.73663	-3.30833	0.409168	hsa_circRNA_103929	AGTGTGGCTGTCACAAAGTTATTACGACCTATTGCCCTGCTAACAA
ASCRP004421	0.115345	0.0176	-2.73532	-3.31063	-0.448022	hsa_circRNA_104148	ATCCCTTCGCCGTGTGAATTCCTTTCAGGAAGCTCCTCAGGGTGCT
ASCRP004185	0.115345	0.0176	-2.73464	-3.31184	-0.528291	hsa_circRNA_103905	AGTCCACCAGGTTCTCTTATTCAAGTACCTTCCGTTGAGAGGGGGA
ASCRP002086	0.116702	0.0179	-2.72728	-3.32479	-1.42801	hsa_circRNA_101740	TGCCCCCGAGATCACTTTTCTCCAGAGAATGCAAATGACACGGCCA
ASCRP000067	0.117036	0.0179	-2.72462	-3.32946	-0.554422	hsa_circRNA_000571	GTTTCAGACGGGGAAGGGGTTGCGTCGCGGGAGTGTTGGAAAGTTA
ASCRP002424	0.117307	0.0181	-2.72134	-3.33521	-1.16893	hsa_circRNA_102089	AGCCCTTCCCCAAGGCAGCCCTGAAGCAGCTTCCTAGGAACAAGGT
ASCRP004181	0.117307	0.0181	2.72113	-3.33559	0.80006	hsa_circRNA_103901	TTCAATGTCTGTGGGCTGTTGCAAGGAATTGCAGGTGAGGCCGCAG
ASCRP001695	0.117494	0.0182	2.71827	-3.34061	0.533321	hsa_circRNA_101336	CTGGTTAGCTGCCTCTGTGTCCTGCAGTTGTTAGCCATCACCTTGC
ASCRP000503	0.117494	0.0182	2.71803	-3.34104	0.306674	hsa_circRNA_100113	CAACAGCCAGGACACCAGCAGTGAAAACACTGTGGTTCCTCCAGAA
ASCRP003387	0.117686	0.0182	-2.71604	-3.34453	-0.272205	hsa_circRNA_103083	TTGTGTTTACTGAGAAGACCACAGAACCTCGCCAATAATGTCACCT
ASCRP004067	0.118291	0.0184	-2.71219	-3.3513	-0.511054	hsa_circRNA_103777	TCAAAATAGGTGAAGAGACAGATTCCCGACAGTTAAGCAATGGGGA
ASCRP005282	0.118441	0.0184	2.7104	-3.35444	0.304098	hsa_circRNA_105035	TCGGATCATGGGATATCTTCTAACCATACCGATGATTCTCCGTATA
ASCRP000809	0.118656	0.0185	-2.70832	-3.3581	-0.506679	hsa_circRNA_100426	GCAAAGTCAGATTAAAGTATGGACAGCCAACCCCCAACAATTTGTA
ASCRP005358	0.118801	0.0186	-2.70554	-3.36296	-0.727754	hsa_circRNA_400064	GCTTCCACACCCACGCCCCATCGGGGCAGAAGCCCACTGTCCCCTA
ASCRP005321	0.118801	0.0186	-2.70544	-3.36314	-0.692386	hsa_circRNA_400025	TTGATAGCCCCCTTAGACCGGAATCCTGGCTCCCGTGTTCTGGACC
ASCRP004808	0.119072	0.0187	-2.70312	-3.36721	-0.78775	hsa_circRNA_104555	TTGTTTTAAGGTGAGCGAAGGACCCCCTCTGAGGCTTTGGAGGTCA
ASCRP001842	0.11954	0.0188	2.69979	-3.37306	1.17398	hsa_circRNA_101491	GGAGCTGAGGGTGTGTGGTTGTGTTGTTCAATCCCCGGAAACACAA
ASCRP000197	0.11954	0.0188	-2.69882	-3.37476	-0.383902	hsa_circRNA_001085	ACAGGGAAGAAGCCAAACCACACAGGCAACCATGGTATGGCATGTC
ASCRP001504	0.119724	0.0189	-2.6969	-3.37813	-0.580419	hsa_circRNA_101138	TTCTGTGACTGTTCGCGGCACCTCATCACCCTGAAATCCTGCAGGA
ASCRP003910	0.120007	0.019	-2.69455	-3.38226	-0.91715	hsa_circRNA_103615	CTGCTGACCGCTTCCGGGAGGATTTCCATTATAATGACACAGCTGG
ASCRP002193	0.120233	0.0191	-2.69245	-3.38594	-0.625022	hsa_circRNA_101850	GATATATAAGGGTCCTGAGAACATTATCTGTAGCTGTATCTCCCCA
ASCRP003094	0.120428	0.0193	2.6859	-3.39741	0.503862	hsa_circRNA_102784	ATAAGTTTGCTTTGGAATCTGAGTGCTTCCTCCTGTTGAAGAGGCT
ASCRP005367	0.120428	0.0193	2.68557	-3.398	0.802302	hsa_circRNA_400073	TTCAGGATGGGTCACAGGCCTCAAAGCAAACCTGGCAAGTGTCCCT
ASCRP003590	0.120428	0.0194	2.6845	-3.39987	0.346351	hsa_circRNA_103292	ACAGATTTACGCCTTTTTCTTGGTCTATGCTCTGGGATGTTTAAGT
ASCRP001614	0.120428	0.0194	-2.68378	-3.40113	-1.2125	hsa_circRNA_101251	CCACAGTGAAGTTGAACTCCCACCACCTGATCTTGGACCAAGTTCT
ASCRP000633	0.120428	0.0194	-2.68342	-3.40176	-0.392851	hsa_circRNA_100245	AAGGCAACAGGTGTCACAGCACGGTGGAGGAACTGCAATGTCTGGT
ASCRP000859	0.120428	0.0194	-2.68339	-3.40181	-1.34835	hsa_circRNA_100476	CCATCTCCAGGAAGATTTCGATGTCGATCATTTTGTGTCTGACTGT
ASCRP004596	0.120428	0.0194	-2.68291	-3.40266	-0.334606	hsa_circRNA_104333	TACCATTACTCCTCAACAGCAATGCAGCAAGTCTTGGAAAACCTTA
ASCRP002369	0.120428	0.0194	-2.68289	-3.40269	-0.804283	hsa_circRNA_102034	AAGACAGCAGGTTCCTCCCCGGGCAGAAGAAATCACCATTCCAGCT
ASCRP000352	0.120715	0.0195	2.68054	-3.4068	0.488309	hsa_circRNA_001937	TGAACATATCCCTTGGATACTCTAAGACCTGACCCTGATTAAGTGG
ASCRP000019	0.121299	0.0196	2.67689	-3.41319	0.944558	hsa_circRNA_000178	ATAATAATAAAGCCTGTCTGTGTCGTTGGCCTTATGACGAGGAGTG
ASCRP000875	0.122266	0.0198	-2.67145	-3.42272	-0.70248	hsa_circRNA_100492	ACCCCGCCTCACCAATACACAGAGATGCAGGTCAGCTCCTCCAGTA
ASCRP003179	0.122266	0.0199	2.67051	-3.42437	0.363118	hsa_circRNA_102871	GGTTTCAATGGCTGACAGAGTACTTCTTGGTGGTCCTGGTAGCTTT
ASCRP002133	0.122339	0.0199	2.66912	-3.42679	0.369137	hsa_circRNA_101787	CTCTACGGCTGCTGCTGGGCCTTTGCAACAACTTCTCTTATGTGGT
ASCRP003873	0.122439	0.02	-2.66698	-3.43054	-0.293807	hsa_circRNA_103577	GGAGGAAGAGGGCAGCTGGTGGAATTTTTGAAGAAAATGGAATCTC
ASCRP000575	0.122439	0.02	-2.66656	-3.43128	-0.519115	hsa_circRNA_100186	GGCACCAAAGTCCTACACACCTCCAAGCAACGAGTTCAAGATCAGT
ASCRP002356	0.123543	0.0202	-2.6607	-3.44153	-0.546916	hsa_circRNA_102020	CTAATGACAGGCGATCTCCAACAGCATCTCCAAGCAATGTTCATTT
ASCRP001861	0.123667	0.0203	-2.65911	-3.44431	-0.394894	hsa_circRNA_101510	TGAAATTGATTGAGTCTCAGCCCTGGGGACATAAGCAGATGTTCAA
ASCRP003698	0.123779	0.0204	-2.65719	-3.44767	-0.308126	hsa_circRNA_103400	CACATCCCCGGGCAACATGCAGGTTCTGGTGACTTACGGTGGCGAT
ASCRP000051	0.123779	0.0204	-2.6565	-3.44886	-0.555697	hsa_circRNA_000455	GCCTTCAACTTCCAGCCCTATTACTGAATGAGAAAATGTATTATGA
ASCRP002751	0.123957	0.0205	2.65468	-3.45205	0.31907	hsa_circRNA_102432	TGCCAGAAAGTGTGTCCCGGCATGGATATCCGGAACAACCTCACTA
ASCRP002793	0.124542	0.0206	-2.65111	-3.45828	-1.26145	hsa_circRNA_102476	GCTGGAGCAGGTGAAGCGAGAAATCTTGGTGGAGGTTCTGACCAAA
ASCRP005320	0.12478	0.0207	-2.64904	-3.4619	-0.855674	hsa_circRNA_400024	CCCCCCAAAAGCGGTGAAGTAGGTATTTTCTTTGTATTTTCTTTTT
ASCRP001365	0.125234	0.0208	2.64605	-3.46712	0.292136	hsa_circRNA_100994	TAGTTCAAAGGTCTAGGCTGAGGTTCTCATCCAGTAAAATTTCTCC
ASCRP001564	0.126019	0.021	2.64167	-3.47477	0.420704	hsa_circRNA_101201	TCATCTGCCAAATCCGGAGCCAAGTGCCCCCTTGTTTCTCTCCCAT
ASCRP005187	0.126407	0.0211	-2.63898	-3.47946	-0.391012	hsa_circRNA_104940	CTCTCCCCAGGGATTTAGTGCTGGCAGCATCTGCGGCTTCAACAGA
ASCRP000976	0.127085	0.0212	2.63508	-3.48627	0.241473	hsa_circRNA_100601	CTTGTGGACGAGCAGGTTGTTGCCCTGGATGCCCAAAATATTGTAG
ASCRP005369	0.129735	0.0217	2.623	-3.50733	0.282257	hsa_circRNA_400075	TGCTTTTCAGAGGCCTCTCATGTAGTTTTTCTCTAGCTTTGGCTTC
ASCRP000860	0.12989	0.0218	-2.62132	-3.51025	-1.1862	hsa_circRNA_100477	CCATCTCCAGAGCCTTAGATCGTCTGTCAGTGAAGGAATTCGGGCA
ASCRP004044	0.130637	0.022	-2.61705	-3.5177	-0.413008	hsa_circRNA_103753	AATCGACCCCAAGTCGTCCTCTTGAGTTCTGGCGCCTTGACTACTG
ASCRP003715	0.130637	0.022	-2.61618	-3.51921	-0.913337	hsa_circRNA_103417	GAAGTAGCCAGCTCCCGTCTTCGTCAGGAAGATTTTCCACCTCGCA
ASCRP003222	0.130728	0.0221	-2.61386	-3.52325	-0.358267	hsa_circRNA_102914	GAACCCAGGGAAACAGCAGCAGAAAGATGCCCTCATTCTCTTCTTC
ASCRP002959	0.130728	0.0221	-2.61296	-3.52482	-0.264866	hsa_circRNA_102646	ATGACCACAGCTGTCCAGACCAAAACGAAGAAGACGTTAGCCAAAC
ASCRP002260	0.130728	0.0221	-2.61271	-3.52524	-0.270081	hsa_circRNA_101918	ATTACCGCAGACCCGAGAACAGGTTCTGCTCCAGACGAGCCCTTAC
ASCRP001583	0.130942	0.0223	-2.60944	-3.53094	-0.406257	hsa_circRNA_101220	CCTCAGCAGTCCAGCCATACGTCGTGTGCCGGCAGTGTCCTGAGTA
ASCRP001726	0.130942	0.0223	2.60899	-3.53171	1.23955	hsa_circRNA_101367	AATCTCTCCGGTTGCTGCTTTTGCTCAGAGGACATCCATGACCCTA
ASCRP001094	0.130942	0.0223	-2.60876	-3.53213	-0.492783	hsa_circRNA_100720	CAGACCGTCCGGGTGAAGCTTTTTATAACTATGATGCCAGAGGAGC
ASCRP004233	0.13171	0.0225	2.6046	-3.53935	0.244473	hsa_circRNA_103953	AATGGCCAGCCCTGATCTTTGTAGAATTTGATGGCTGTAACTGGAA
ASCRP004254	0.132187	0.0226	-2.60127	-3.54514	-0.319105	hsa_circRNA_103974	ATTTCGCAAGACGGGTCTTACCCCCTTGATGGAAGCAGCTTCTGGA
ASCRP001399	0.132187	0.0227	2.59931	-3.54855	0.542579	hsa_circRNA_101029	TTTACTCCACTGGGTGGTTACCCTAACAGCTAATGATAAGACAAGT
ASCRP001712	0.132187	0.0227	2.59918	-3.54878	0.396939	hsa_circRNA_101353	ATGGTTTGGTCCAGGTTCTGTTCTTTATGCCCCGTGGTGCCCTGCT
ASCRP005265	0.132187	0.0227	-2.5986	-3.54979	-0.477555	hsa_circRNA_105018	TGCAGCCTTCAATGTACCATGACCCGTTGCAGCCATCAGCAGTCTC
ASCRP004573	0.13263	0.0228	2.59579	-3.55467	0.379476	hsa_circRNA_104309	TCTTATTCAGCTGCAGGATGGACTTTCTGGTCCTCTTCTTGTTCTA
ASCRP000147	0.132649	0.0229	-2.59471	-3.55655	-0.471348	hsa_circRNA_000896	CTGGTCGAGGGTCGGATTTGGGCGCAGGACGGGGAGTCGGGGGAGG
ASCRP000715	0.132907	0.023	-2.59266	-3.56012	-0.384292	hsa_circRNA_100330	CCAAACAACGGACTGACCACTGAGCAGATGCTGAGAAAAGACCAGA
ASCRP000821	0.133452	0.0231	2.58945	-3.56568	0.599867	hsa_circRNA_100438	ATTTAACCGCTCTCTGCCTCCCAGAGGACTCAGGAGAGTGCAGCTT
ASCRP002235	0.133547	0.0232	2.58806	-3.56809	0.26027	hsa_circRNA_101893	TCAAAGATTTTTTGTGCTCTTCACTGGGGCAGTACCCAAAGGAAAC
ASCRP005124	0.134306	0.0234	2.58403	-3.5751	0.403245	hsa_circRNA_104877	GGCTGCTGCTTTTGATATTTTCTAAATTTGGCACAGTCTTGAAGAT
ASCRP005342	0.134644	0.0235	2.58167	-3.57918	1.03585	hsa_circRNA_400046	CACTGGGGATGCACAGACTTACAGGGGTGTGTATGCATGCACCTGT
ASCRP004369	0.134947	0.0236	-2.57831	-3.58501	-0.321466	hsa_circRNA_104096	TCCCGAGAGCCAGGTTCACTAAGAATCTTTCCCCAGACAAAATCAA
ASCRP004467	0.134947	0.0237	-2.57714	-3.58704	-0.490381	hsa_circRNA_104194	CCTATATCAGGTACAACATACTCAGGGGAGATTGGCACCAAGAAAA
ASCRP005030	0.134947	0.0237	2.57699	-3.58731	1.02203	hsa_circRNA_104780	AAGTGAAGAACTGTGAGGTGGAGCAGTGGGACTCGGATGAGCCCAT
ASCRP003198	0.134947	0.0237	-2.57525	-3.59031	-0.1922	hsa_circRNA_102890	AAAGAATGCCCTCTCTCCCAGGTTTGATGATTCCTGTCTTTTGTGT
ASCRP001812	0.134947	0.0237	-2.57503	-3.5907	-0.454263	hsa_circRNA_101461	ACACCAGCGAGGAGAAGTTTGCCCTAGTGGAGATGGACGTGCACAT
ASCRP003625	0.134947	0.0238	-2.57449	-3.59163	-0.212051	hsa_circRNA_103327	TGTTGGCAGTCACAGGGAAGATTCGGAAAGGGCCAGGTATTCCCAC
ASCRP004578	0.135443	0.0239	2.57154	-3.59676	1.29458	hsa_circRNA_104315	CCTGTTGTTGTTGTTTCAAGAGAATTTCCCAAGAGATTTGTGTAGT
ASCRP003922	0.135836	0.024	2.56891	-3.60131	0.577341	hsa_circRNA_103627	ACAATGGCCGTGTTTTGCTGTGCGTTCTCTGGGATGGGTAGAGATG
ASCRP003178	0.135836	0.0241	2.56801	-3.60288	0.274782	hsa_circRNA_102870	GATGCAACAGCCGGATGTTTCTTCTCGTGGGAGCTCCCAAAGCAAA
ASCRP001670	0.136372	0.0242	-2.56491	-3.60824	-0.604777	hsa_circRNA_101311	TGACTCGGAAGTGCAGGTGAAGCCAAAAACCTTCCCTCTTACCCGG
ASCRP004577	0.13667	0.0243	2.56267	-3.61212	1.06692	hsa_circRNA_104314	TATGAAACAAAAAGCTGTATGTGATGGCTTCTGTGTTTGTCTGTCT
ASCRP001130	0.13667	0.0243	-2.56177	-3.61367	-0.520268	hsa_circRNA_100756	GCGCTTACTGCCCACACACAGCGCCTGGTCCACATCCAGTCGATGC
ASCRP005296	0.137216	0.0245	-2.55778	-3.62059	-0.877295	hsa_circRNA_105052	GCATCTCTTCCAACAGAACCAGGATAACTACATAAAGAGACAAAAA
ASCRP002620	0.137216	0.0245	-2.55768	-3.62076	-0.419488	hsa_circRNA_102301	GGCACCTGAGAGCCCCTTCACAGATGTAGTCACTACAAATCTTAAA
ASCRP002797	0.137301	0.0246	-2.55637	-3.62303	-0.891824	hsa_circRNA_102480	TGCAGTACAGGTTCAAGAGCTGCAGGATTCCCTCTTGAGGCTGGAG
ASCRP002694	0.137498	0.0247	-2.55462	-3.62605	-0.32976	hsa_circRNA_102375	TTACCTCAGTACATAGACCACGTCATATCACGCCACCTAGACCAAG
ASCRP001793	0.137958	0.0248	2.55186	-3.63083	0.650475	hsa_circRNA_101434	TGGCCTCTCAGGATGAAACAAGTGAAGATGCTAACTGTCTTGCTTT
ASCRP000236	0.139006	0.025	2.54682	-3.63953	1.05366	hsa_circRNA_001241	GGCTATGGAGGTCACGTCCCGTGTGGCTGTGGAGATCTCTGTGTGA
ASCRP003535	0.139305	0.0251	2.5447	-3.64321	0.577853	hsa_circRNA_103237	TCACGGAAGATTCTGGACCCTAACACTGGGTCTGCAGATCTCCAGG
ASCRP003659	0.140327	0.0254	2.53848	-3.65395	1.08833	hsa_circRNA_103361	GTGTGTGCTGTGATGAGGAAGATGAAGATCCTGCCAAAGGTGATCA
ASCRP002533	0.140327	0.0254	-2.53834	-3.65419	-0.540317	hsa_circRNA_102205	TTTGCTCCTTACCCTCTCGGCATACCAACGTTTACAAATCCAGCAG
ASCRP002400	0.140327	0.0255	2.53787	-3.65499	0.303715	hsa_circRNA_102065	TCTTGTCCTACCTGAAGTATGCCATTAGTTCCCAGCTGGCCGCCAC
ASCRP000342	0.140769	0.0256	2.53402	-3.66164	0.712301	hsa_circRNA_001844	TGGGACTGAGGTGTTAGTATAAACTTTGCCAAGTTTGTAGCCTGCA
ASCRP002544	0.140769	0.0256	-2.53395	-3.66177	-1.02924	hsa_circRNA_102216	CAACCAGCACAACAGCATCAAAGATGAAGAAGAAGAGACAGTCTTT
ASCRP005264	0.140769	0.0258	2.53068	-3.66741	0.458147	hsa_circRNA_105017	ATGTCATTGAGTGTGATTGGCCTCTCTCTGGCTCAGCATACATCTC
ASCRP000204	0.140769	0.0258	-2.53047	-3.66777	-1.00361	hsa_circRNA_001108	GCCCCTCTGTCCAAGAGCCCACATATTTGTTCATTTACTTTTTAAT
ASCRP002912	0.140769	0.0259	-2.52948	-3.66948	-0.683505	hsa_circRNA_102599	AGCCTTGCACCTGAAGACCCCACCTTTCCTGAAATGTATGACACAC
ASCRP001766	0.140769	0.0259	-2.52779	-3.6724	-1.09033	hsa_circRNA_101407	AGCTGGAATATTGTAATGGATGACTCACTGGTTGTGTGGAAGGAAG
ASCRP000371	0.140769	0.0259	-2.52776	-3.67245	-0.423713	hsa_circRNA_002042	AGAAGGACAAAACCATCCCCTGCTCTTGGGACTTGGGCCAGTCTTT
ASCRP004021	0.140769	0.026	-2.52582	-3.67579	-0.355664	hsa_circRNA_103730	CTCACACCAGGGAGATCCTAAGAAAAAGCTTATATGTTCAGTGTGC
ASCRP002992	0.140769	0.026	2.52564	-3.6761	0.596955	hsa_circRNA_102680	TGTTGCCCTGTGTGCGAAGATGAGAACTGGACTGATGACCAACTGC
ASCRP000002	0.140769	0.026	2.52549	-3.67635	0.521747	hsa_circRNA_000010	TCCTTTTGGCCTCACCCAATGACCTGGCTGAAGAAGAGCCCAAGGA
ASCRP002446	0.140769	0.0261	2.52493	-3.67733	0.840408	hsa_circRNA_102113	ATGCTGGTTTGGTATGTTTCCTTCCAATGGGCTTTTGGTGTAGGAT
ASCRP000360	0.140769	0.0261	2.52473	-3.67767	0.415621	hsa_circRNA_001978	AACCCTGAGGTGAGGTGACTTCGCCTGTGATGGACTTCCAGTGTGA
ASCRP001332	0.14134	0.0262	-2.52161	-3.68305	-0.440508	hsa_circRNA_100960	AGAGCTTTTGGGCAAGGACTTCCTCGTTCTGCCCATCTTCCTAACA
ASCRP002993	0.141979	0.0264	-2.51824	-3.68886	-0.330184	hsa_circRNA_102681	CTGCCCACAGTGTACAGATGAGAACTGGACTGATGACCAACTGCTT
ASCRP003739	0.142659	0.0266	-2.51473	-3.6949	-0.377411	hsa_circRNA_103441	GCAGCGTCAGAACTGTCAAGTAATCCACCTCTGGCTACCATCCTTA
ASCRP001269	0.142953	0.0267	2.51268	-3.69843	0.391492	hsa_circRNA_100896	CATTCCTCCACAAATTCTTCTGTGTGACTCTTGCGATAGTGGATAC
ASCRP004258	0.143271	0.0268	-2.51055	-3.7021	-0.287902	hsa_circRNA_103978	ACTTGGCAAAACCCCAAGACTGCTTCTGAGACAGAAACAGATATCT
ASCRP003894	0.143769	0.0269	-2.50774	-3.70693	-0.3021	hsa_circRNA_103599	AAATATCACCCACGGAATATGAAGACAAGGCTGGAAGACCTAGCAA
ASCRP003623	0.144092	0.0271	-2.50425	-3.71294	-0.79885	hsa_circRNA_103325	TCACCTCACAGAACCTCTGAACAAATGCTAAGCATGGACTGCGCTG
ASCRP000372	0.144092	0.0271	-2.50383	-3.71366	-0.458901	hsa_circRNA_002044	GCCACCTTGTTCTCTAAAGTTTTCAGTTTAAATTCTCAACTGGCAA
ASCRP000053	0.144092	0.0272	2.50287	-3.71531	0.283312	hsa_circRNA_000466	TTTTCAAAGAGAAAGAGGTGGTCCCAGCATCTTGTTAAGCAGACTG
ASCRP003492	0.144092	0.0272	-2.50216	-3.71654	-0.533114	hsa_circRNA_103194	ACCCCAACAAGCCTGAGATCCTGAAGCATGAGATGAAGGTGTTCTT
ASCRP002222	0.144092	0.0272	2.50188	-3.71702	0.250014	hsa_circRNA_101880	ACTGTCTGCTGTTGCCGCAGATTCTTATACATCGTCAATCTAGATG
ASCRP000772	0.144851	0.0274	-2.49812	-3.72347	-0.341237	hsa_circRNA_100387	TGCTTGCACAGCAGAGGCCTTCGAGGAAGAGGCCCACCTCCTTCAT
ASCRP002587	0.145063	0.0275	2.49641	-3.72642	0.269388	hsa_circRNA_102259	AACAGATCCAACTGTTTCCTGGTTATAAGTGCACTGGTGATTGCTG
ASCRP000849	0.145285	0.0276	-2.49464	-3.72947	-0.266069	hsa_circRNA_100466	GCCAGCTCTGGTTGTAGAAGGAACGCCTCTTATTGATGGAAGAAGA
ASCRP003949	0.145285	0.0276	-2.49374	-3.73101	-0.532402	hsa_circRNA_103655	ACCTGCTCCAAGTCCCTCAGGGGTGGCACTGAATCAACAAGACAAG
ASCRP001125	0.145599	0.0277	-2.49165	-3.73459	-0.555793	hsa_circRNA_100751	CCTCCTCTCTTATACAATTGGACCGTGGATGAGGTGGTACAGTGGC
ASCRP002231	0.146445	0.0279	2.48761	-3.74153	0.557333	hsa_circRNA_101889	CAAACAAGAGAGTTGCTGGAGAATGTAACCCTAATCCATAAACCAG
ASCRP003446	0.146491	0.028	-2.48653	-3.74339	-0.303124	hsa_circRNA_103143	GACAGCCCAGGATTTGTCCCATGCCACCATTGAAATGTATACAAGC
ASCRP004955	0.146618	0.0281	2.4844	-3.74704	0.779493	hsa_circRNA_104703	CGTCTCTGTGTCAGAAAAGATGTTGGTTTAAAGCGATTTTTTCCTA
ASCRP004284	0.146618	0.0282	-2.48342	-3.74873	-0.444891	hsa_circRNA_104004	GGGCATCGTCGAAATTACCCTCAACAACAACAACATCAGTCGCATC
ASCRP001106	0.146618	0.0282	2.48331	-3.74891	0.416846	hsa_circRNA_100732	GGGACTACAGAAACAGGACCTTGCCCTGTCACTCAGGATGGAGTTC
ASCRP004825	0.146852	0.0283	-2.48154	-3.75195	-0.516229	hsa_circRNA_104572	AGCCACCAGGACCCTAACTCAATCTTGGAGCCACTTTTGGAGCGCA
ASCRP004697	0.147057	0.0283	2.47988	-3.7548	0.792333	hsa_circRNA_104441	CAAAAACAGCACACTCAAAGGCCGACGAGATTGAAATGATCATGAC
ASCRP005008	0.147116	0.0284	-2.47875	-3.75673	-0.486033	hsa_circRNA_104758	AGTCATCTTGTCATCCGTCCTTGGCTCAGGATTTGGAGAGCTTGCA
ASCRP004223	0.147179	0.0285	-2.47756	-3.75876	-0.441286	hsa_circRNA_103943	AGACTTAGTGCAACACCACAGCTTACTAACAAGAATCCCAAAATGA
ASCRP003876	0.147179	0.0286	-2.47589	-3.76162	-0.430401	hsa_circRNA_103580	GGATGACTTTCTTTACCACTCCTGAAGGCCCTAAACCCCGTTCCAG
ASCRP000647	0.147179	0.0286	-2.4758	-3.76179	-0.398964	hsa_circRNA_100259	AGTTTCACAGGAACAATGCCACACAACCAAAGAAGTCTATTAGCTT
ASCRP002478	0.147304	0.0286	-2.47444	-3.76412	-0.382946	hsa_circRNA_102146	AGAGCACTTGCGGAATGGCCAAAGACTATGACGGGTCTTCCTAGCA
ASCRP002017	0.147454	0.0287	-2.47298	-3.76661	-0.77922	hsa_circRNA_101670	AGGTCAATGGGCGGGTGCCCCTACCTCACATTCCCGTATGGATCCT
ASCRP003902	0.14748	0.0288	2.47199	-3.76832	0.70684	hsa_circRNA_103607	TGGGACTCCTGGTGACTGCTGAGGTTGGAAAGCTCTTGGGTGAAGA
ASCRP003063	0.147505	0.0289	-2.47029	-3.77123	-0.684267	hsa_circRNA_102751	TGTGCAGGAGCTGGCCCGGATTGCGGACAGTAAGGATCATGTGTTT
ASCRP002417	0.147505	0.0289	2.46924	-3.77303	1.81464	hsa_circRNA_102082	GGCTTCCATGATGCTGAGTTTGTGTGTGAACGGACACTGAAATATT
ASCRP005163	0.147505	0.029	-2.46816	-3.77487	-1.7872	hsa_circRNA_104916	CACTCCCTAGTTCGTGCCCTCGTGAGGCTGGCATGCAGGATGGCAG
ASCRP003980	0.147505	0.029	2.46766	-3.77572	0.98784	hsa_circRNA_103686	GTTTAACAGGAATTAGAAGTGCGTCTCACCAACCAGCCAAGATGAA
ASCRP000278	0.147505	0.029	2.46742	-3.77615	1.494	hsa_circRNA_001459	AGCATGTATGTGTATATGTGAGCAGCTGTGCACGTATGATGTCAGT
ASCRP004725	0.147648	0.0291	2.46539	-3.77962	0.339372	hsa_circRNA_104471	TGCCTTATCACCTTCTTGCTTGCAGGATAAGAACAAGAAACTGCGT
ASCRP003884	0.147648	0.0292	-2.4648	-3.78062	-0.294834	hsa_circRNA_103589	TTGGAATTGCAGATGTGAGGTCGGCACAGACGCAACCCAGTCTCCT
ASCRP005169	0.147648	0.0292	-2.46422	-3.78162	-0.529324	hsa_circRNA_104922	AAGAGGAGAGGTGCCCACCAGCTGACCTCTCCTCCTTCTCAGTCAG
ASCRP003316	0.147993	0.0294	-2.45952	-3.78966	-0.22859	hsa_circRNA_103010	TTTACAAGAGCCCTGAGCTGCCACGGATACTGAGGTTGGGGTGACT
ASCRP000794	0.147993	0.0295	2.45818	-3.79195	0.730188	hsa_circRNA_100411	CTTACAAGGACTTTCTCTGGGTGTGCTGATTCTCTTCCTTACTTTT
ASCRP000607	0.147993	0.0295	-2.45807	-3.79214	-0.689206	hsa_circRNA_100219	CAGACGACTCAGAGAGATTAAACAGATTCTAGAAAATGAACTTCAG
ASCRP001546	0.147993	0.0296	2.45643	-3.79494	0.270756	hsa_circRNA_101183	CTCATGGATGGGCCTATTCCCTGGTGGATTCCAGTCAAGTGTCTAC
ASCRP004047	0.147993	0.0296	2.45637	-3.79505	0.220451	hsa_circRNA_103756	CTACTGTGTTCTCAGGCAGTAGATCATCTAATGCAAAATTGCCCTC
ASCRP004443	0.147993	0.0296	-2.45574	-3.79612	-0.397135	hsa_circRNA_104170	GGCAAAGCAGAACTCCATCCGGCACAACCTGTCACTGCATAGTCGA
ASCRP003121	0.147993	0.0297	2.45547	-3.79659	0.396033	hsa_circRNA_102812	AAACATGATACAATCTGCAAATGGTGGTTCTGCTGGGCATGGACAT
ASCRP005341	0.147993	0.0297	2.45534	-3.79681	1.08786	hsa_circRNA_400045	AATGATCTGGCCCCAATGCTCTGGGCACCACAGTCTGCCCCTTCAG
ASCRP002859	0.147993	0.0297	-2.45502	-3.79736	-0.533831	hsa_circRNA_102546	TGATTTCCATTAAGGATGGTCTAGTCTATGCAGTCGAGTTCTCCCA
ASCRP005084	0.148994	0.0299	2.4505	-3.80508	0.236005	hsa_circRNA_104836	GAAAAGCAGTGTTAAAAGATCGCCTTTGTTTTGCCATTCTCTACAG
ASCRP003576	0.149129	0.03	-2.44914	-3.80741	-0.250631	hsa_circRNA_103278	AACAAGAAGGTGAAGTTTGGCATGAAGGGGTGCAGATGATGCCTGG
ASCRP005392	0.149296	0.0301	-2.44697	-3.81111	-0.791516	hsa_circRNA_400099	GATGGGGGAATCCCCCTTTCCCACCTCTTGGAACCAAACTGGGATT
ASCRP001930	0.149296	0.0301	-2.44679	-3.81142	-0.371183	hsa_circRNA_101580	TCAACACAGGAAGGACTTGAACGCAACTCCCAATTGCAGAAAATTG
ASCRP003852	0.150288	0.0304	2.44234	-3.81902	0.858756	hsa_circRNA_103554	ATCGTGTCATGAGAGTTCTTCTGTGTGGCAGTTCAGAATGATGGAT
ASCRP001124	0.151455	0.0307	2.43729	-3.82763	0.988177	hsa_circRNA_100750	TCTTTGGGCCTCCTCTCTAGTTTTGCCGAATTGACAAGCCCCTGTG
ASCRP000161	0.152035	0.0309	-2.43389	-3.83343	-0.629675	hsa_circRNA_000950	TGCTTAACATGGGAGATGTCCACACACAGTCATACCTGTGTTTGAA
ASCRP005329	0.152035	0.0309	2.43349	-3.83411	1.60519	hsa_circRNA_400033	ACCGATTTCTAGTGTGTGTTGGTGATGGGGCCGCAGCTGGTTTACC
ASCRP003119	0.15261	0.0311	2.43058	-3.83907	0.913282	hsa_circRNA_102810	CGTGGACAAGCTCTTCAGTGGGTCATCTGTGTGTCACAGCCTCAGA
ASCRP004846	0.152703	0.0311	-2.42938	-3.8411	-1.24496	hsa_circRNA_104593	ATACAAAGATAAGCTCCCCAGTTAAAGATCTCAGATGACCGGCTGA
ASCRP004394	0.153353	0.0313	2.426	-3.84687	0.781667	hsa_circRNA_104121	TTCTACGTGGTGGTGACGACAGTGAGACCGTGCACTACCACTATGG
ASCRP005310	0.153353	0.0314	-2.42536	-3.84795	-0.385952	hsa_circRNA_400014	TATATGGTCATGTGCTTGTGACTCAGACCCCCTTGACTGCCCAGTG
ASCRP004480	0.154029	0.0315	-2.42212	-3.85347	-0.296588	hsa_circRNA_104207	AAATTTTGCAGAGAAAGACTGTTCGCCATGGATTTCCCTATCAACC
ASCRP003287	0.154566	0.0317	2.41932	-3.85824	0.646116	hsa_circRNA_102980	AGCCTCCCTGGACCTACAAGAACAGTGAGGAGCTTCGGTCTCGTAT
ASCRP003985	0.154566	0.0318	-2.41724	-3.86177	-0.590739	hsa_circRNA_103691	CAAAACCAAACAGACCTACTCCAATGAAGTCCATTGTGTTGAAGAG
ASCRP003357	0.154566	0.0319	2.41681	-3.86251	0.273569	hsa_circRNA_103052	TTTTGCCTTGTTCATGATTCTGCCTGATCAATGCAGGAGTCCTGTA
ASCRP005181	0.154566	0.0319	-2.41681	-3.86251	-0.414818	hsa_circRNA_104934	ACCTCCAGAACCTAGCCATCACGGCCAACCGGGTTGAACCATGATT
ASCRP001196	0.154725	0.0319	2.4154	-3.86491	0.631375	hsa_circRNA_100822	ACTAATGAGGGTTACGGGTAAATTCCGGGGAGGTGTGAACCCCTTC
ASCRP004742	0.155081	0.0321	-2.41249	-3.86985	-0.31851	hsa_circRNA_104488	ATGGACAGCTAAATTTAGAAATTTGGCGAGCTTTAGCCCCTCTCCT
ASCRP000011	0.155081	0.0321	2.41245	-3.86992	0.270386	hsa_circRNA_000095	ATGCATAGTGCTTTGGTCTAGATTCCCTATCTTTAGCTATGACTGA
ASCRP002546	0.155097	0.0322	2.41154	-3.87146	0.284601	hsa_circRNA_102218	AAAGAACTCGACCATCATGGAGCAGTTCAACCCTAGCCTCCGGAAC
ASCRP000328	0.15521	0.0323	-2.40913	-3.87557	-0.484486	hsa_circRNA_001754	AAGAGAAATGGAGCCCTTCTCCAAGGGAAGGATGACTAAGAGTTTA
ASCRP003443	0.15521	0.0323	-2.40886	-3.87602	-0.502751	hsa_circRNA_103140	CTGGTGTACGGTTTTGGGATTTGAGATTGACGCGGTGAACTCTGTC
ASCRP002639	0.15521	0.0323	-2.4086	-3.87646	-0.630748	hsa_circRNA_102320	AAACTACACAAAGCACATGGAACAAGCAGCTATACCCCTGATAAGT
ASCRP000398	0.155499	0.0325	2.40675	-3.87961	0.294285	hsa_circRNA_100008	AGTCTGACATCAATGCCATTTGCTGCCCTGTGGGACATCGAGACCG
ASCRP000616	0.155562	0.0325	2.40568	-3.88141	0.18494	hsa_circRNA_100228	GTTTGCAGTTCATGATACCAGTAGTCCTTTGCTAATCAGTGGAACC
ASCRP004283	0.156858	0.0329	-2.39929	-3.89227	-0.637172	hsa_circRNA_104003	GAGTTCCCCTCCAACCACAGTGTACAGTGGACCCTTCTGTGAACAC
ASCRP004680	0.156858	0.0329	-2.39877	-3.89315	-0.39554	hsa_circRNA_104424	AATATTTCTGGTCTTGCAAGAGCAAAATCCGTCCCTAGCCACACAT
ASCRP004091	0.156858	0.0329	2.39859	-3.89346	1.36116	hsa_circRNA_103801	ATTCTGTGTGTGCCTCTGACAGCCCTGATAGGCAGTAGACAGCAGG
ASCRP002470	0.156858	0.0331	2.39687	-3.89638	0.305197	hsa_circRNA_102138	TTTAAACCTCTGTTGCTGCTGAAAAGAAATGCTGCTTCTCGTCTGG
ASCRP000022	0.156858	0.0331	2.3966	-3.89683	1.54783	hsa_circRNA_000200	GTGGTTAAGACAGTGTTGTGTTGAAGGGACTGTTTATAATTTTCAC
ASCRP004766	0.156858	0.0331	2.39615	-3.8976	0.220079	hsa_circRNA_104512	GTGCTCTTCTGCATTAGTGATCTGGAGCAGCAACCATTTGTTCCCC
ASCRP000979	0.157039	0.0332	-2.39469	-3.90007	-1.05566	hsa_circRNA_100604	CAGCTCTCTCTATTTCAGAAGAAAGTGGTAGCTTCCTTTCCAAGAA
ASCRP001038	0.158395	0.0335	-2.38889	-3.90991	-0.20499	hsa_circRNA_100664	AGAATCTGGGACCTCAACAGGATGACCAGTGTCCCAGTGAAGGAAC
ASCRP004882	0.158395	0.0336	2.38764	-3.91201	0.211931	hsa_circRNA_104629	TTCTGCTCAGGTTACTATAACAACAGTACCAAGGTGGCTGTGAAAA
ASCRP001876	0.158395	0.0336	2.38752	-3.91221	1.14775	hsa_circRNA_101525	GTGTTCTGTGTTTTTTTGCCAGTTGTGCTCCTGGTTCACATGGTAT
ASCRP000910	0.158485	0.0337	2.38639	-3.91414	0.296399	hsa_circRNA_100529	GTTGCTGACACTAGTATTGTCTCCAGCTTTAAGACCACGACATCGA
ASCRP003059	0.159325	0.034	2.38196	-3.92163	1.17031	hsa_circRNA_102747	GAAAAACTTTCTGATCTTATGGTTGGTGATGAGGCAAGTGAATTAC
ASCRP002492	0.159325	0.034	2.38186	-3.9218	0.858033	hsa_circRNA_102160	AGCCTCGCAGTTCGCTTTGCACCTTATAGGCCTCCAGATATCTCCT
ASCRP000792	0.159698	0.0341	-2.37976	-3.92535	-0.364628	hsa_circRNA_100409	ATTCGAGCAGGGATTTGAGAGCACCTCCAGAACAAGGAAAGATTTT
ASCRP002867	0.160018	0.0342	-2.37785	-3.92859	-0.40216	hsa_circRNA_102554	ACTGCACCCTGCAGGGCTGAACAAGACATCCTCTTTCTCCTGCGAA
ASCRP001862	0.161635	0.0346	-2.37156	-3.93921	-0.276918	hsa_circRNA_101511	AGTCTGCTAACACACTAGCTATAGGAGATCCCAAACTGATCTTCCA
ASCRP004006	0.162698	0.0349	-2.36718	-3.94662	-0.302696	hsa_circRNA_103714	ACCAACTGAGGGAATGCAGAGAGCAACCAATGTCACCTACCAAGCC
ASCRP004208	0.162795	0.035	2.36603	-3.94856	0.268099	hsa_circRNA_103928	CAATGCCATTATTGGTTATTACGACCTATTGCCCTGCTAACAACGA
ASCRP000713	0.162827	0.035	2.3651	-3.95013	0.351242	hsa_circRNA_100328	AGACATATAGGTGCTGTGAGGAGCAAAGGCCCTGTTGTCCAGTACA
ASCRP001528	0.163674	0.0353	2.36146	-3.95628	0.198548	hsa_circRNA_101165	TCATTGCGGGAATGAAATGAATGATGTGCCTTTCTTTGATATCCAA
ASCRP002618	0.16414	0.0355	2.35864	-3.96103	0.251104	hsa_circRNA_102299	AGAAGCTGTGGCTCCCTGGACTTTGTCTCACAAGATGAAATGTTGA
ASCRP000795	0.16414	0.0355	2.35827	-3.96165	0.628366	hsa_circRNA_100412	GTGCTCTTCATGTTCTTTGGAAGTGTGCTGATTCTCTTCCTTACTT
ASCRP005010	0.164717	0.0358	-2.3543	-3.96835	-1.26303	hsa_circRNA_104760	GTTCTCCTCAGAGCCTGCTTTCTGAAACAAAGGTCTTCACTGCCTC
ASCRP005012	0.164717	0.0358	-2.35425	-3.96842	-0.433277	hsa_circRNA_104762	CTCCTGTTCTCCTCAGAGCCTGGATTTGGACGTGGCAGAGGGAGAG
ASCRP003257	0.164717	0.0358	-2.35353	-3.96964	-0.550327	hsa_circRNA_102950	ATGTGGAGAGGGTCTTCCAGGACGGGAATTGTGGGTAACTTGGCCA
ASCRP000467	0.164717	0.0359	-2.35245	-3.97146	-0.828015	hsa_circRNA_100077	GAAGCTGGAGGGCGTCACTGAGGGCTACAATGGCACCATCTTTGCC
ASCRP000667	0.164717	0.036	2.35079	-3.97426	0.221501	hsa_circRNA_100279	TCCAGACATGCTTCTCAATAGGTTTGGCATGGACAAGATCTATGAA
ASCRP002799	0.164717	0.036	-2.35077	-3.97429	-0.742179	hsa_circRNA_102482	CCTCCTACAGACGCATCTTCTCTCCAGACTGCCGATCCCAGAAAGC
ASCRP002531	0.164717	0.036	-2.35066	-3.97447	-0.310658	hsa_circRNA_102203	TGACCTCAGCAGGGCATCCAGGTTTCAACAGAAAATGAGAAATATC
ASCRP001289	0.166186	0.0364	-2.34502	-3.98397	-0.453446	hsa_circRNA_100916	ATCGGAAATGGAACCACTAAGAAGATTCACTCCTTCTCCAGTTGCA
ASCRP004504	0.167905	0.0368	-2.33861	-3.99476	-0.407226	hsa_circRNA_104232	TATTCAGAAAGATTGTGCCTCTACTCCTGCTTGTACAGACTGCTTT
ASCRP000805	0.168149	0.0369	2.33701	-3.99745	0.459908	hsa_circRNA_100422	AATTTGAGTGTGTTACCTTCCCTGGTTTGAAGTGTATTACAAGCTT
ASCRP003994	0.168216	0.037	-2.33599	-3.99917	-0.473113	hsa_circRNA_103700	AAGCTGCACAGGATAACCACCTGCCTCAAAGATAATCTGCTCAAAA
ASCRP004594	0.168554	0.0371	-2.33409	-4.00236	-0.404756	hsa_circRNA_104331	GAATCACTACCAAGCTTCTGACCGACTAAATCATTTTGCTACTTTA
ASCRP000244	0.170065	0.0375	2.32842	-4.01188	1.18224	hsa_circRNA_001288	ATAAAGGATACTTTCTGGAGGTTGGTGGTCCAGTAGCACAGATAAG
ASCRP001611	0.171115	0.0378	2.32363	-4.01992	0.955246	hsa_circRNA_101248	CAACTGTCTGCTGGTTGGTGGAGAATTTGACTTGGAGATGAACTTT
ASCRP003261	0.171115	0.0378	-2.32346	-4.02021	-1.20281	hsa_circRNA_102954	AAACTCTTTGTTTACTCCTCCCAAAGTGAAATGCCTGACCAAGATC
ASCRP004319	0.171454	0.038	2.32157	-4.02336	0.304916	hsa_circRNA_104045	CCACGTCAAAGATGGTTCCTACCTGGCTGAGTTCCTGCTGGAGAAA
ASCRP002292	0.173598	0.0385	-2.31358	-4.03675	-0.416848	hsa_circRNA_101951	TGTTGCTGCTCGAGAGCCCGAGGGAAGAATGCGTCTCTGCCCAAAC
ASCRP003458	0.173598	0.0386	2.31319	-4.0374	0.411227	hsa_circRNA_103157	TTTCTTTTCAAAGGTGTGCTTTGCCTGCATGGATGGACAAGAGTTC
ASCRP000877	0.174226	0.0387	2.31042	-4.04205	0.29873	hsa_circRNA_100494	ATCTTACCAGAGATCAGTTGGCCTTATTTCCTCAGTGGAAATCTAC
ASCRP000386	0.17432	0.0388	-2.30933	-4.04387	-0.396275	hsa_circRNA_002149	CTGGGCTCAGCGCGTTCGTTCACATAGCTCCCAGTTTTAACATTTC
ASCRP000208	0.174634	0.039	-2.30755	-4.04685	-0.273248	hsa_circRNA_001131	GGGGGCACAGGTGGAGGCAGCATGTCAGTGCAAACAGGGGACTGGT
ASCRP004393	0.175146	0.0391	-2.30516	-4.05086	-0.307235	hsa_circRNA_104120	AGAGGAAGAGACATCTCCAGTTACAGCCCGAACACTGGAAACTCTG
ASCRP001370	0.175773	0.0393	-2.30204	-4.05607	-0.356963	hsa_circRNA_100999	TGACATCTGGGTATGGGAAGGTCGGTGGCGAGTGATCCCTCATGAT
ASCRP002390	0.175773	0.0394	2.30119	-4.05748	0.265481	hsa_circRNA_102055	CATCCTATTGAAGAATGGTGGACTCATCTTTGGTTAAATGAAGGTT
ASCRP002054	0.175773	0.0394	-2.30082	-4.05811	-1.0367	hsa_circRNA_101707	GGTTCTTGCAGATTATCTCCCTCCAAACTCTAAAGAAGGAATATAA
ASCRP002090	0.176028	0.0396	-2.29859	-4.06184	-0.981798	hsa_circRNA_101744	CTCTCCCAAGGTGGGAATGGAAGTGGCCCCACATCTCAAAGAAACC
ASCRP002272	0.176028	0.0396	-2.29844	-4.06208	-0.281986	hsa_circRNA_101930	TGCAGGGTGACGGTTGAGACTGAGCTAAAGTTAATCTGTTGTGACA
ASCRP001855	0.178233	0.0402	2.29073	-4.07495	0.427536	hsa_circRNA_101504	AGGACTGCTGGTGTGGACACTGCAAGAGACTTGCACCTGAGTATGA
ASCRP003678	0.178233	0.0402	2.29006	-4.07607	0.480014	hsa_circRNA_103380	CACCTGGCTCTCCGGATGCTTCTCAGCTGCTTCAGATATTACAGAG
ASCRP005216	0.17971	0.0406	-2.28476	-4.08491	-0.390989	hsa_circRNA_104969	TCCGAGACAACGCGGGCGCTAATATTGACACCTGCTCAGAAGACCA
ASCRP002823	0.180078	0.0408	2.28285	-4.08809	1.41649	hsa_circRNA_102509	GGTGCTGTTGGTGTTGTTCGATCCTTTGGTACAGAAGACAGACCGA
ASCRP001567	0.18018	0.0409	-2.28113	-4.09096	-0.238673	hsa_circRNA_101204	ACAAGTGGAACGGGCTGAGCAAGAACGTGCGCATCGACCCCAGTAG
ASCRP000105	0.18018	0.0409	-2.28097	-4.09123	-0.346717	hsa_circRNA_000721	CTAGACCCAGCGCAAAAAGAACAGTGGACTCTGCTGCCTGCTCACT
ASCRP000217	0.180291	0.041	-2.27908	-4.09437	-1.44166	hsa_circRNA_001175	TCTCTCCTGCAAGTATCCCAGGTTGAAGTCTTGGCCTCGGAGGATG
ASCRP005365	0.180291	0.0411	-2.27766	-4.09673	-0.595374	hsa_circRNA_400071	TCCCCAAGGTCAGGACTTCTCCCACTCTGGGCTCTGGCTGGAGCCA
ASCRP001647	0.180291	0.0412	-2.27688	-4.09804	-1.47836	hsa_circRNA_101287	CAAGATACAAGATCTCCCCAATAATATGATTTACCAAGTCGCCATT
ASCRP002354	0.180291	0.0412	-2.27682	-4.09814	-0.491043	hsa_circRNA_102018	AGGCAATGTGGCGATCTCCAACAGCATCTCCAAGCAATGTTCATTT
ASCRP004993	0.180291	0.0412	-2.27672	-4.0983	-0.461966	hsa_circRNA_104743	TACTAAAAACCAACAACAACCAGTCTGAACAACCCAGTCCTGCCAG
ASCRP002662	0.180544	0.0413	2.27517	-4.10087	0.455507	hsa_circRNA_102343	CAGATAGTTCCTGTGTTTCTGTAGAAAATGTTTCCTGACTGCAATG
ASCRP002339	0.180562	0.0414	2.27397	-4.10288	0.755271	hsa_circRNA_102002	ATGACCCCTTTCATGGCCTCCAGATTCACCAGACCAGAGCACTTGG
ASCRP002126	0.180562	0.0415	-2.27356	-4.10355	-0.410777	hsa_circRNA_101780	TCAAGATGGATCGGGCTTTCGGACAGTCCTTTCTCCAGCCCGACAT
ASCRP001034	0.181338	0.0418	2.26923	-4.11076	1.01456	hsa_circRNA_100660	TCTACAAGAGATTGTGGTGGTGCCATGCAGCAAGAATCAGAGAGAT
ASCRP004566	0.181338	0.0418	2.26898	-4.11117	0.283571	hsa_circRNA_104302	CCCGGGGGCTGTGGAGGGTATTTCTCAAGCTGCCAGATACGTTTAC
ASCRP004767	0.181338	0.0419	2.26764	-4.1134	1.43417	hsa_circRNA_104513	ACTCTGTACAATGCCGGTGGTGGTGTGCACATTGAGCCCCGGTATA
ASCRP005119	0.181338	0.0419	-2.26746	-4.1137	-1.27113	hsa_circRNA_104872	CCCCCAGCAGAAGTTGATCTCTTAGAAGATGATGGAAGTTTCAATA
ASCRP000909	0.181338	0.042	2.26692	-4.1146	0.456872	hsa_circRNA_100528	GCCACGTGGGCTCAGATTGTCTCCAGCTTTAAGACCACGACATCGA
ASCRP000340	0.181338	0.042	-2.26657	-4.11518	-0.299851	hsa_circRNA_001830	AGTAAACCAGCCATCACTGCTCTTATATACGTATATTCTCTCCTTA
ASCRP005301	0.182001	0.0422	-2.2638	-4.11978	-0.464875	hsa_circRNA_400005	ACACAGAGCACACCACCTCCGTACCTTGTTGGGGTAACCTGGTGAT
ASCRP005226	0.182754	0.0424	-2.26077	-4.12481	-0.323557	hsa_circRNA_104979	CTCGTACGCCAGCTGATAACAAAGCCATTGACCTTTGCCGATTGTG
ASCRP002113	0.183015	0.0427	-2.25789	-4.12959	-0.462795	hsa_circRNA_101767	AAGCCAGTGTTGATGGCTGGACCCCCGCAGCAAACACAAGTTTAAG
ASCRP005200	0.183015	0.0427	-2.25769	-4.12992	-0.357736	hsa_circRNA_104953	GGACTACTTCTACCGACCAGAGACCCAGCACCGATCTACGCAGACC
ASCRP002583	0.183015	0.0427	-2.25768	-4.12993	-0.701665	hsa_circRNA_102255	ACCATGAAGATCAGCCACTGGGATGGTTGTCGCCGTGATCCTGAAG
ASCRP004908	0.183384	0.0428	2.25581	-4.13303	0.215563	hsa_circRNA_104655	GACTTTTAAGACATGTGCATTGCCATTGCGATTTCTCTTCTCATGA
ASCRP001788	0.183411	0.0429	2.25497	-4.13443	0.640259	hsa_circRNA_101429	TCCTGAAGAGCAATCCCACTCCAGGAATTGTGATCAACAGGCCCAA
ASCRP000338	0.183813	0.043	2.253	-4.13769	0.249775	hsa_circRNA_001820	GTGCCCTGAGGGCTGAGCCACGTGTGCCCATCTCAGACGTGGGCCT
ASCRP003892	0.184997	0.0434	2.24872	-4.14479	0.275175	hsa_circRNA_103597	AACTTCTTTGCAAGTTTCTCCTTGGACCAAGATGACTGATGGAAAA
ASCRP000462	0.185503	0.0436	2.24646	-4.14854	1.15154	hsa_circRNA_100072	CCGGCACAGGGTGTGTAGCTGGGACGGTGCTGGTCTGAGCTGGACC
ASCRP004521	0.185821	0.0437	-2.24476	-4.15136	-0.649479	hsa_circRNA_104250	ATGAACTTCACAGCTGGCGCCCATGCGGCTCTACACGCTCTCCAAG
ASCRP004538	0.186678	0.0439	-2.24147	-4.15679	-0.379758	hsa_circRNA_104268	CCAAAATAAACTCCTGTGTCCTACCGACCTCTCCACTGTATCTGGG
ASCRP003469	0.187728	0.0443	2.23763	-4.16315	0.323558	hsa_circRNA_103168	AACAGTGAGGGTACATTACCTGTGCTGAATACACTCACTTTTATGG
ASCRP002847	0.188098	0.0444	-2.23579	-4.16619	-0.624922	hsa_circRNA_102534	CACCTCCACAGCTAATAATCACAAGAAGTTGTCAGAATTTGGAATT
ASCRP003046	0.188257	0.0445	-2.23457	-4.16821	-0.454642	hsa_circRNA_102734	GCCTCAACAGTTCCTGAATGTTCCAATGTTTCGAAATGTCTCTCTG
ASCRP003582	0.188318	0.0446	-2.23363	-4.16975	-0.441248	hsa_circRNA_103284	CACTGACCAGCCAGAGCGTCCATTACTTGCAGAATTTCCATCAAAG
ASCRP002036	0.188346	0.0447	2.2325	-4.17163	0.661428	hsa_circRNA_101689	ACCAAAATACATAAAGAGGTGTGAATGACAGAGGTGGTGCCATCCA
ASCRP002448	0.188346	0.0448	-2.23105	-4.17401	-0.805012	hsa_circRNA_102116	GAAAACACACACTGCACACACAAAAGACATGCCATTTACATGCGAA
ASCRP001761	0.188346	0.0448	-2.23069	-4.1746	-0.231583	hsa_circRNA_101402	TTCATTCAATGCAGGGTCTCAGTACAGGTGTCAACCTTTTAGAAGC
ASCRP005210	0.188346	0.045	-2.22882	-4.17769	-0.26239	hsa_circRNA_104963	TTACTGCAAGAAGTATGAGCAGCTCAAGGACATGGCGGACTCCCGC
ASCRP004665	0.188346	0.045	-2.2281	-4.17888	-0.811276	hsa_circRNA_104405	CGCAGCAGAGTCCAGAGGCCAGTCATCCACCCACTGTCCAGCCCGA
ASCRP004977	0.188346	0.0451	-2.22784	-4.17932	-0.391592	hsa_circRNA_104727	CCCAGCGACACCGAACAACAACGTATCCTTACACAGAGACACAGAT
ASCRP004116	0.188346	0.0451	-2.22763	-4.17967	-0.384524	hsa_circRNA_103826	AAACATACAGGAACAAAGAAAACTCAGCTCCCTTAGAGGAAAATAC
ASCRP003275	0.188346	0.0451	2.22753	-4.17982	0.229118	hsa_circRNA_102968	GCAGAGATTGCAACAGCCAACTCAGTTTATAAATCCAGAAACACCT
ASCRP003369	0.188449	0.0452	-2.22649	-4.18155	-0.301982	hsa_circRNA_103065	CTTCTCGCCCTCCCAGGACCCTGATGCTTGGTGTGACCTGAGTAAA
ASCRP004396	0.188455	0.0452	-2.22572	-4.18281	-0.279851	hsa_circRNA_104123	CACATATCAGGCTCGAGAACTCTTCCTAAAAGCAGTAGAAGAAGAA
ASCRP001650	0.189203	0.0455	2.22233	-4.1884	0.488841	hsa_circRNA_101290	AAGTGGACTTCCTGGCACCTGTGTTTGCTCTGTTTGTACCATTTTA
ASCRP003691	0.189203	0.0455	-2.22205	-4.18887	-0.318487	hsa_circRNA_103393	AAACAATTAGAGCATCAGGAAACAGTACTGCTGGAGCACCCTTTCA
ASCRP004476	0.189203	0.0456	2.22131	-4.19009	0.550311	hsa_circRNA_104203	AACTTTCTCATATTTGGTTCTTCTGCTGGTGATGCAGTGTGGTCAG
ASCRP001885	0.190074	0.0459	-2.21803	-4.19548	-0.473366	hsa_circRNA_101534	CTAACAGCCCAAGTAAAAAACATGAAGCAGATGAGTTGAGTGGAGA
ASCRP003389	0.190098	0.0459	2.21722	-4.19681	0.997252	hsa_circRNA_103085	ACATCATCCCCATTAGGTACTGTTGTGGGTGTTGTTCTTTACACTG
ASCRP005363	0.190245	0.0461	-2.21574	-4.19925	-0.215739	hsa_circRNA_400069	TTCTTCTTAGCATGGGCTGAGGGCTAGAAGCCTGCGCCTTCACACT
ASCRP002427	0.190245	0.0461	-2.21531	-4.19996	-0.278222	hsa_circRNA_102092	CTCTGCAAGAACACATCATCTCAGAGTTGGAGCACCTGACGTTTGT
ASCRP001582	0.190572	0.0462	2.21363	-4.20273	0.336933	hsa_circRNA_101219	ATTCCTGCTTCCGAGTTGCCAGGTGCGGTCTGCCTGCAGCCTTTCT
ASCRP002997	0.190658	0.0463	2.21264	-4.20435	0.846717	hsa_circRNA_102685	AGTGTTGCCCTGTGTGCGAAGAAGAGAAGCCAGATTGCTCCAAGGC
ASCRP000890	0.191347	0.0466	-2.20977	-4.20909	-0.410161	hsa_circRNA_100508	GCCGCCTCCTTCTTTGCACGGACCCTGCTTTCTCGGCTGTGATTCA
ASCRP001527	0.191347	0.0466	2.20914	-4.21012	0.44566	hsa_circRNA_101164	AGCCTCTGATTCTCCTGTGCCAGTCCTTCGACATCTGTGGACGTGT
ASCRP002044	0.191347	0.0467	-2.20844	-4.21126	-0.428846	hsa_circRNA_101697	TGAAACTCATCCAACAGCCTCAAAATGCGGATCCAGACACATTAGT
ASCRP000063	0.192155	0.0469	-2.20539	-4.21629	-0.334261	hsa_circRNA_000552	AGCCCTTGGGGGCTGCGGGTGGACGCTCCTTCGGCCCGCCGCTGTT
ASCRP003588	0.192374	0.047	-2.20403	-4.21852	-0.712743	hsa_circRNA_103290	ACCCCCATCTGCTCCAACCAGGAATGGAGACGCCATTGGATGTTTT
ASCRP000226	0.192579	0.0472	-2.20261	-4.22085	-0.506919	hsa_circRNA_001205	TCACAAGCAGGACTCTTCTCCAGCCCGGACACCTGCTCCTCAATGG
ASCRP002262	0.192579	0.0472	-2.20165	-4.22242	-0.325467	hsa_circRNA_101920	CTGAAATAAGGTTCTGCTCCAGACGAGCCCTTACCACGTTGACTCA
ASCRP004162	0.192579	0.0473	2.20124	-4.2231	0.966149	hsa_circRNA_103881	ATTTCATGACTAACCAGTGATGGTGATTGCTCACACCAAAGCCTTG
ASCRP002445	0.192721	0.0474	2.1997	-4.22563	0.302148	hsa_circRNA_102112	ACACTGGTGGAAGATCACAATCGAAGCAATGAAAAGTGACATTGAT
ASCRP001542	0.192721	0.0474	-2.19937	-4.22617	-0.364928	hsa_circRNA_101179	CTTTGCCCAGACCCAGAAGTCCACATTCCCCTCGAGAATCTACAGC
ASCRP001014	0.192721	0.0475	-2.19864	-4.22736	-0.456855	hsa_circRNA_100640	AGCACCATCAGTCACCCACAAAAGCTGTATATAATGCCAGACATTG
ASCRP001184	0.193053	0.0477	2.19697	-4.23011	0.256632	hsa_circRNA_100810	CTATGTTGAGATTGTCTACAACCTGTTGTCTCTGCGCTTCAACTCA
ASCRP002783	0.193183	0.0479	-2.19446	-4.23422	-0.663477	hsa_circRNA_102466	ATCCCTGGCCGCAAAGGAAACAGAGAAACCCCCACTTCCTTGCAAG
ASCRP000853	0.193183	0.0479	2.19361	-4.23562	0.514059	hsa_circRNA_100470	TCTGTGTATGTTCATCCATGGCTGGTTGATCATGTCTTCACTGATG
ASCRP000557	0.193183	0.0479	-2.19355	-4.23572	-0.452717	hsa_circRNA_100168	ACCTCAGCACCATACCCAGGTCCACAAGGCGATTACAATTTCCAGT
ASCRP003317	0.193183	0.048	2.19349	-4.23581	0.238541	hsa_circRNA_103011	ATTACGATTTCACATGGCTGCTGAAGAAGAGGATGGACTCAGACAA
ASCRP001223	0.193183	0.048	2.19297	-4.23668	0.899686	hsa_circRNA_100849	AGAGCTGAGGTACTTCGTGAAGCTCCGGCTCCCACCTTGTCTTTGT
ASCRP001280	0.193478	0.0482	-2.19116	-4.23964	-0.326483	hsa_circRNA_100907	AGCTCAACAGAGTTCTTCACTACCACAACCAAGGAGGGATATGATA
ASCRP004213	0.193478	0.0482	2.19068	-4.24042	0.241982	hsa_circRNA_103933	ACTGGTCTAAGGTGCTCCTGTTTCAGGATCAGAATTATGGTCTTCA
ASCRP004760	0.193811	0.0483	-2.18901	-4.24316	-0.324237	hsa_circRNA_104506	GAATCCACCTCTCCTTCTTCACATCGTAGAAACATGGCATATAGGG
ASCRP002699	0.194141	0.0485	2.18735	-4.24588	0.38421	hsa_circRNA_102380	TTGGGACAAGCTTTGATCTTGCCTCTGTCTATTGCTTTCTGACTGT
ASCRP004880	0.194478	0.0486	-2.18567	-4.24862	-0.573471	hsa_circRNA_104627	TTGGGGAAGTCTGGATGGGCATGGAGAATGGTGGAAAGCAAAGTCC
ASCRP003279	0.195385	0.0489	-2.18215	-4.25438	-0.428077	hsa_circRNA_102972	TTCTCACGTCCCATCTCCTGCAGTGGCCAAAGAATGTGGTGCTTCG
ASCRP003052	0.195385	0.049	2.18167	-4.25518	0.408942	hsa_circRNA_102740	TGTGCTGTTGTTTAAACTAGCTCCTTTTTGGTTCAGGTGTGCTGGT
ASCRP004310	0.196726	0.0494	-2.17701	-4.2628	-0.370483	hsa_circRNA_104035	ATGGGCTACAAAGAGAACGGGATCTGAAACTTGCCCACCCTTCGGG
ASCRP004165	0.196726	0.0495	2.17645	-4.26371	0.344366	hsa_circRNA_103885	CTGCCTGCAGGAAAATGTTCTGCTGCTGCCCTGGATGTTCTTGCAA
ASCRP004005	0.197095	0.0497	2.17415	-4.26746	0.33795	hsa_circRNA_103712	AGACAGATCTGAGTATCTGACTGTCTTCTCTCAGATGATTGCATTT
ASCRP003308	0.197095	0.0497	2.17398	-4.26774	0.389094	hsa_circRNA_103002	TGCTGGGCTTATTCTGAGATCTGTATCTGTGGACCTGAATGTTGAT
ASCRP005186	0.197172	0.0498	-2.17275	-4.26975	-0.63433	hsa_circRNA_104939	TGAAGACCTTGAAGCTCTACGTCTCCTCCGAGAGCCGCTTCAACAC
ASCRP004919	0.197172	0.0498	2.17207	-4.27086	1.25588	hsa_circRNA_104666	AGACCTCATCGGCCTGCCTTAAGTGTGAAAGTAATGACTGATGAAA
ASCRP000611	0.197172	0.0499	-2.17143	-4.27191	-0.380176	hsa_circRNA_100223	CTGCCCTCTACCACCTGCCACAGACCCCTTTGCTTCTGTTTTTGGG
ASCRP001586	0.197172	0.05	2.17081	-4.27293	0.320943	hsa_circRNA_101223	TTCAGCTTCCTGTTTTTCTGGATTCCAGTGGAATGACACTGGTGAT
ASCRP003523	0.197172	0.05	-2.17021	-4.27391	-0.516735	hsa_circRNA_103225	ACTTGGAAAGGGGAGATGGCCCAATCATTTGGAGCAAGAGGTGGTG
ASCRP002450	0.19737	0.0501	-2.16894	-4.27597	-0.252729	hsa_circRNA_102118	TTCGACGAACACATGAAAACACACACTGATAAGATGCTCCCAAGTC
ASCRP000062	0.197568	0.0502	2.16768	-4.27803	0.859708	hsa_circRNA_000543	CTGGAGTAACTGGCATGTGAACAAGCTTTTTCTGTATTTACATACA
ASCRP002351	0.19786	0.0504	-2.16552	-4.28155	-0.166769	hsa_circRNA_102015	ACTTTTAAAGGATGGCCCCAGAAGTAATTTTAGCCATGGATGAAGG
ASCRP000391	0.19786	0.0504	-2.16544	-4.28168	-0.82434	hsa_circRNA_100001	CCCAGCCACGCCAGGACGGCAACCTTCCCACCCTCATATCCAGCGT
ASCRP003017	0.200348	0.0512	2.15722	-4.29507	0.265987	hsa_circRNA_102705	CATCACCTTGGGGAAAGTGCAGTGTTGCCCTTCTGAATGAGACAGA
ASCRP005383	0.200348	0.0512	-2.15711	-4.29525	-0.418815	hsa_circRNA_400090	CTTCTCTTTCGCTGCGGGCCCGGCTGGTGCGGGAAGCCAGGAGGGG
ASCRP003699	0.201151	0.0515	2.15419	-4.30001	0.73098	hsa_circRNA_103401	CACATCCCCGGTCTCCATGTAGTGGAGGTGACATATGATGACGTGC
ASCRP002067	0.202186	0.0518	-2.15064	-4.30578	-0.806158	hsa_circRNA_101720	AGAAGGAATGCGCCAAGACTAGGAAAATCCCTGCCCAGAGTCCAGC
ASCRP000166	0.203168	0.0521	2.14725	-4.31129	0.226289	hsa_circRNA_000962	TGGAAAAGAACGCAATTCAAGGCTACTGTGGTTCCCAGAGGCTGGC
ASCRP001959	0.203248	0.0523	2.14552	-4.3141	0.522903	hsa_circRNA_101610	AGCATCTGCCTTCGGAAAGGCCTCATTGCTACGATTTCAGAGTACC
ASCRP001600	0.203248	0.0523	-2.14515	-4.31471	-0.468971	hsa_circRNA_101237	TTATCATGACCTCAGACTATCAGCTTCAGAAGCTGCTTACCATGGA
ASCRP005156	0.203248	0.0524	-2.14493	-4.31507	-0.301131	hsa_circRNA_104909	TAAGTTTAATGGAGGCAGAATCCAGAGACCACATTTGAAGTATATG
ASCRP003938	0.204452	0.0527	-2.14095	-4.32153	-0.408831	hsa_circRNA_103644	TCCACCACCGGAAACAGCACTTCTTCTCAGTCTCAGACAAGTACTG
ASCRP001751	0.204515	0.0528	-2.14007	-4.32294	-0.51945	hsa_circRNA_101392	AACCACCTGAGCAATACTACCTAATCTGGGAGCCTGCAAGTGACAA
ASCRP003593	0.204545	0.0529	-2.13929	-4.32421	-0.240839	hsa_circRNA_103295	CGACATCCGGGTCGGCCACACACCCGGAGCACCGTCATCACAGCGG
ASCRP003524	0.205535	0.0532	2.13591	-4.32969	0.266865	hsa_circRNA_103226	ACCCTCTGTGAAGTGATTATTTTTCTGTTGCCCACTTTTCAATATG
ASCRP001843	0.205623	0.0533	-2.13498	-4.33121	-0.516065	hsa_circRNA_101492	TGAATTGGCTCTGCAGCTCGCAAGCACCAGCCTCCCTACATCATTG
ASCRP002777	0.20686	0.0537	-2.13058	-4.33833	-0.230115	hsa_circRNA_102460	GTGGATGCAGAATCCGGACAATCAGATAGTTCAAACCAGCAAGGAG
ASCRP004482	0.20686	0.0538	-2.1297	-4.33975	-0.210382	hsa_circRNA_104209	GCAAATCTCCAACCTCTGACTGTTCGCCATGGATTTCCCTATCAAC
ASCRP002703	0.20686	0.0538	-2.12956	-4.33998	-0.334606	hsa_circRNA_102384	AACTGCAAAGGAAAACCTCACAGCACGGGTAGCTCTGAACGGATTC
ASCRP000756	0.208294	0.0543	2.12476	-4.34775	0.224777	hsa_circRNA_100371	TTGAGTGCAGACACGTTGGTCGTCATTGCCTCCGAGCCCACTTTAG
ASCRP003861	0.208294	0.0543	2.12433	-4.34845	0.676813	hsa_circRNA_103563	GATCCCTCTATGTCAGCTTCTTCTCAGCCTGTTGATAACCATGTTA
ASCRP004532	0.209941	0.0548	-2.11925	-4.35665	-0.348806	hsa_circRNA_104261	TAATTTGAAAGGCAAGAGGGCACATTGGGAGATTCAGCTTGCAAGA
ASCRP001964	0.211133	0.0552	-2.11537	-4.36292	-0.35207	hsa_circRNA_101615	ACTTCCTCAGACTTCAACACTGACAACTTCATCTGCAAGGAGGACC
ASCRP002915	0.211133	0.0553	2.11471	-4.36397	1.44441	hsa_circRNA_102602	AGAGGAATTGGTTGTTGGTGTGGATCAGAAGATGAGGAGGCACCTT
ASCRP003442	0.212334	0.0557	-2.11087	-4.37018	-0.368397	hsa_circRNA_103139	TCAACAACTGACACCATTCGCTTTTCACCCAAGATGATTTGATGTC
ASCRP000465	0.213666	0.0561	2.10669	-4.37691	0.213231	hsa_circRNA_100075	GCCTGAGCGGGACTCTCTGGCTTGCTTCAATCAGACCTACACCATT
ASCRP005085	0.214656	0.0564	2.10343	-4.38217	0.275365	hsa_circRNA_104837	CTGACAGATAGCTGCTATCGCCTTTGTTTTGCCATTCTCTACAGCA
ASCRP002172	0.214669	0.0565	-2.1027	-4.38334	-0.963496	hsa_circRNA_101828	TGTTTGATGCTTTCAATCAGAGACTTAAGGAATGCCTCTGGCTCAG
ASCRP002601	0.215259	0.0567	2.10048	-4.38691	0.383153	hsa_circRNA_102273	CCTAACCCAGTCGGATACGCTAAAAATCAAGCAGTTGCCCAGAGCT
ASCRP005362	0.215414	0.0568	-2.09939	-4.38866	-0.487774	hsa_circRNA_400068	TCAGAGGTCTTTCCAGTCCAGATCGTCCATGCTGTTTGGGGGCCAT
ASCRP005306	0.215482	0.0569	-2.09845	-4.39018	-1.84464	hsa_circRNA_400010	AGTATAGGATGACTCACTGACAAATGGAACCTGTGTGGGCAGTTAA
ASCRP000425	0.215482	0.057	-2.09784	-4.39116	-0.267356	hsa_circRNA_100035	CTCTGAATGCACTGAACACAGTCCACAACTCCCAGGCCTGTTGCAG
ASCRP002841	0.218271	0.0578	2.08956	-4.40446	0.445622	hsa_circRNA_102528	CCCTGAAGCTGCCTGGTGTGACCGAGTGTTATGAGTGTCATCCTAA
ASCRP001264	0.218271	0.0579	2.08923	-4.40499	0.581494	hsa_circRNA_100891	TTCTAATGCCTTGTAGCTGCTGCTGGTGGTGACAATGTCAAATAAC
ASCRP005229	0.218271	0.0579	-2.0886	-4.40599	-0.278944	hsa_circRNA_104982	TGAGGGAAGAGCTGGAGGAGAGCAGGAGTGTTCAGAAGCAAATGAA
ASCRP001445	0.218383	0.0581	2.08723	-4.40819	0.206584	hsa_circRNA_101077	ACAGGGCTGTGGGCACCTCATTGTGAACATGCTTTCTGCAACGCCT
ASCRP003826	0.218383	0.0581	-2.08695	-4.40865	-0.540403	hsa_circRNA_103528	GCCCTCCAAGCTCGAGATGCTGCTGTGCAGAAGATTGAGACTATTA
ASCRP000351	0.218458	0.0582	2.08608	-4.41005	0.331839	hsa_circRNA_001915	CCTGTGTCCAGTCCTTGGTACATAATGCTGGGAATTACTTTTAAAG
ASCRP003365	0.218533	0.0584	-2.08439	-4.41275	-0.562264	hsa_circRNA_103060	ACATCCTTCACCCCTGTAGGAACAGTCCAGGCTCTGCAGACAGCAT
ASCRP004127	0.218533	0.0584	2.0841	-4.41322	0.26687	hsa_circRNA_103837	ATTGGTCCTAAACAGACACAGGGTGCTTATTGGTTCTCCGTTAGTT
ASCRP000921	0.218533	0.0584	-2.08384	-4.41364	-0.529394	hsa_circRNA_100541	TAAAAATGGAGTCAGCCTCACTCCTCCCAAAGCAATCAAAGAGAAG
ASCRP004853	0.220025	0.0589	2.07886	-4.4216	1.3661	hsa_circRNA_104600	TTCTCTCTCTAAAGAAGAGTGGGAAATTGAAGGCCTCCTATAAACG
ASCRP002552	0.220025	0.059	2.07811	-4.42281	0.922332	hsa_circRNA_102224	CTGATGTGTTTTATAAGGTTGGCTGGATATTTACAGACCTCGTCTC
ASCRP003792	0.220025	0.059	2.078	-4.423	0.223767	hsa_circRNA_103494	TTCATTGAAAGTTGGTACTAAGAAGTGCCTTTCCTGACGTCTCTGC
ASCRP004147	0.220395	0.0592	-2.07638	-4.42558	-0.268086	hsa_circRNA_103859	CCACCACGATAATGCAGTTCTTATTACTAGGTTAAAAAATGGCCAT
ASCRP003085	0.220753	0.0594	2.07479	-4.42812	0.963979	hsa_circRNA_102774	ATCTGGAAGGAACATCTTCGCCTGGTGTGGTGGAAAGTCCAACATC
ASCRP002643	0.221189	0.0596	2.07301	-4.43097	0.847608	hsa_circRNA_102324	GCAGTTCAAGTATGTGCTGTCTGTCTTGAAATTTACCTACCCTACA
ASCRP000423	0.221257	0.0597	-2.07217	-4.43232	-1.53106	hsa_circRNA_100033	ACTGAACACAAGGGAAGTGTAACATCTCCCATTTTTCTGACATATT
ASCRP004895	0.221457	0.0598	2.07098	-4.43421	0.652284	hsa_circRNA_104642	ATGCAAAAGGAAATCTGATAAGATTGCACCTCTGCCTCCACCTCCC
ASCRP000142	0.221604	0.0599	-2.06994	-4.43589	-0.268528	hsa_circRNA_000868	TCACAATACAGGAACGTCGATACGATGCGGTCAGGACCCTCCCTGT
ASCRP004821	0.221632	0.06	2.06919	-4.43707	0.306879	hsa_circRNA_104568	TTCTTCTCAGCTGCTTGTGGCGGATTCCTCACCAAGCTCAACGGCT
ASCRP000253	0.222873	0.0605	2.06395	-4.44544	1.31458	hsa_circRNA_001350	CTTAGGTGGTGTGGGAAGATCTGTCTGAGAAGAAACAAGAAAGCAA
ASCRP001714	0.222873	0.0606	-2.06297	-4.44702	-0.258436	hsa_circRNA_101355	AACACCGAGGCTGAACACTTTCCAGGCAGTTTTGGCATCTGATGGG
ASCRP000981	0.222873	0.0607	2.0627	-4.44745	0.717594	hsa_circRNA_100606	CCGGAATTTGAAAAGTGCCTGTGTTTCATTTTTTACTTTTGGTACC
ASCRP003654	0.222873	0.0607	-2.06265	-4.44752	-0.330826	hsa_circRNA_103356	CCCCAGCCAGATACTTGGCATATCGAAATTTTATGATTGACACGTA
ASCRP000004	0.222873	0.0607	2.06206	-4.44846	0.812652	hsa_circRNA_000031	ATTGGCACTCAGTGACCATCAGGCTGGCTGTGTGCGGCAGCTTCCT
ASCRP001671	0.222873	0.0607	-2.06204	-4.4485	-0.187379	hsa_circRNA_101312	ACAAGGCCAGAAGTCGGTGATCCACAGTCGGCAGTTTCCATTCAGA
ASCRP002764	0.224059	0.0612	2.05802	-4.45491	1.43122	hsa_circRNA_102445	TCAAGGACAAGATGAAGATGTGTGTGTCTTTAAGTGCTCAGTGTCC
ASCRP004008	0.224059	0.0612	-2.05773	-4.45537	-0.242555	hsa_circRNA_103716	GGAACTTCTACAGGAACGGGGAATGCAGAGAGCAACCAATGTCACC
ASCRP003585	0.225201	0.0616	2.05421	-4.46097	0.211122	hsa_circRNA_103287	GGCTTGTGCCTCACCAGAATGCCAGAGGATTCAACATGAGCATACC
ASCRP002329	0.225965	0.0619	-2.05164	-4.46506	-0.219876	hsa_circRNA_101992	AGCTGTACACAACCCCATGCAGGTGTTTCAGGGCTTTACGTCATTC
ASCRP004510	0.226648	0.0621	2.04928	-4.46881	0.53833	hsa_circRNA_104238	AAACTAGACGTCAGGGCTCTGTGTATGAATGACAAGGATACCTTCA
ASCRP002537	0.227163	0.0624	-2.04734	-4.4719	-0.465865	hsa_circRNA_102209	GCAGCAGCAGCTTCACCAGGTCACCATGGCTGTTATTGGCTCCCTT
ASCRP003583	0.227339	0.0626	-2.04536	-4.47506	-0.602195	hsa_circRNA_103285	TACTCCTCAACAAGTTCCTCCTCTTGACATTTGCAGAGTGCTCCCA
ASCRP004183	0.227339	0.0626	2.04488	-4.47581	0.311467	hsa_circRNA_103903	TTAAATATTATGCTACAGAATTTGACCCTACCTGAACCCATCCTTC
ASCRP004029	0.227339	0.0627	2.04447	-4.47647	0.228109	hsa_circRNA_103738	TGACAAATGCAACATCTGTGTGCACCAGGCTGCCTGCTGTTTCCCG
ASCRP001786	0.227339	0.0628	2.04379	-4.47754	0.628319	hsa_circRNA_101427	CATGTTGCAGGACACTCTGATTGTGTGGTCTGAAGCAGAAAATTAT
ASCRP002254	0.227339	0.0628	-2.04359	-4.47786	-0.289981	hsa_circRNA_101912	ATTTCCACCAAAGGCAGGACTTCCACCAGTGGGCGATCCATGAGCA
ASCRP000223	0.227912	0.063	-2.04151	-4.48116	-0.212312	hsa_circRNA_001196	TAAAAGACTAAATATACTGCTGCTTGGAGGGGGATGGGGATTGGAA
ASCRP002698	0.229472	0.0635	2.03688	-4.4885	0.640519	hsa_circRNA_102379	GAGAACCAAAATGTGTGCATTGCAATGTTGTGTACTCTGATGTGGC
ASCRP003948	0.229472	0.0636	-2.03636	-4.48934	-0.245486	hsa_circRNA_103654	TGTTCATCAGCATCAAATGGGGTGGCACTGAATCAACAAGACAAGC
ASCRP001061	0.230618	0.0641	2.03175	-4.49665	0.302334	hsa_circRNA_100687	ATCCAGTGTCCAGCATCAAACACTTGGCTTGTTCCAGAAACTAAAG
ASCRP002614	0.230618	0.0641	-2.03146	-4.49709	-0.262445	hsa_circRNA_102295	AGTTACACAGATTCAGATCCAGGACATACAAGTGAAAATTGGGGGG
ASCRP004264	0.230618	0.0641	2.03145	-4.49712	0.182073	hsa_circRNA_103984	TGGCATCATGGCCCTGTTTGACACACAGAACGAACTACGCGCACAC
ASCRP005213	0.230618	0.0642	-2.03077	-4.4982	-0.430314	hsa_circRNA_104966	CGCCCAGAAGCATGCAGCCAGTAAAGATCCCAGAGAAGTTCGAGAA
ASCRP001799	0.230618	0.0643	2.03021	-4.49907	0.873127	hsa_circRNA_101440	ATTGGAACAAGTGGTGATGGCACTTCTCAAATACTGGCCAAAGACT
ASCRP004851	0.230618	0.0644	-2.02961	-4.50003	-0.692869	hsa_circRNA_104598	CCTTCTTCCACATGAAAAGGATAAGGATTCTTTCTACTAATCCAGA
ASCRP000687	0.230798	0.0645	2.02851	-4.50177	0.259767	hsa_circRNA_100300	CCACTTTTAGGTCTTGGGCTTGCCTTCAACTTGAATCCAGCTCTGA
ASCRP002279	0.231079	0.0647	2.02661	-4.50478	0.540632	hsa_circRNA_101938	AGACAGCTGGATGAATCGAGTAATCCTGCCTGTGTCTGTAGATGAG
ASCRP005073	0.231079	0.0647	-2.02652	-4.50492	-0.320754	hsa_circRNA_104824	CCACCACATTACTTAGGAAATCACATTCTGCCTGATGAAGATCTGG
ASCRP003440	0.231225	0.0648	2.02551	-4.50652	1.20557	hsa_circRNA_103137	GGTGCCTCAGGTGGTGGTCTGTCACGTGGTGGGCCAGGCTATTCAG
ASCRP004769	0.231536	0.065	2.02378	-4.50925	0.26034	hsa_circRNA_104515	TAACTATAGGGTACTGGTATCTTGGGCCTCTAAAAATCAAAGCAGC
ASCRP004458	0.231536	0.0651	2.02345	-4.50978	0.404096	hsa_circRNA_104185	GCTACAAAAGTGCTTATCAGATTGTTGTGGAAGAACTGCACCCACA
ASCRP001926	0.231825	0.0653	2.02155	-4.51277	0.225496	hsa_circRNA_101575	TAAGGGTTTCTCTACTATGTCCACATCAGACAACAGTCAGCGCTTT
ASCRP003752	0.231825	0.0653	-2.02135	-4.5131	-0.309606	hsa_circRNA_103454	TAATGTCCCTGCAGTTATACTTAAGCATGAACATTGACGACAAACT
ASCRP003344	0.231825	0.0654	-2.02079	-4.51398	-0.408599	hsa_circRNA_103038	AAAGTGCAGTTCCCTCCGGTGTGTTCGAGGGCGAGCTCTCCGATAC
ASCRP002709	0.232012	0.0655	-2.01969	-4.51572	-0.308967	hsa_circRNA_102390	AACATCACCTCTCAGATGGAGTTTTAACATTGAATGCGGAGAACAC
ASCRP001887	0.232364	0.0657	-2.01818	-4.5181	-0.235296	hsa_circRNA_101536	ATCACTTACAATTAGGAGCTCTTCCTTTAATGGCGGGCACATGAAC
ASCRP003067	0.233351	0.066	-2.01514	-4.52289	-0.204545	hsa_circRNA_102755	GGATGCCCAGGACTTGATAGACGACCTGAAGTCAGAACTGAGTGGC
ASCRP003135	0.233523	0.0662	2.01346	-4.52554	0.245987	hsa_circRNA_102826	ACAATTTAAGGTTATCAAGTTATACCCAACCAGCAGCAAAACTACC
ASCRP004227	0.233523	0.0663	2.01301	-4.52626	0.346701	hsa_circRNA_103947	GTATACATCCAGCAAAGGATATACACATGACACCATCCACTGACTT
ASCRP004370	0.233523	0.0663	2.01279	-4.52661	0.209992	hsa_circRNA_104097	CAGTGCCCAGAGTCTGGTCCAGAATCTGTTCCACCAGGATCTCTTT
ASCRP003331	0.233526	0.0664	-2.01213	-4.52764	-0.180458	hsa_circRNA_103025	AGAAGTTCGTGATAGACACCACAGTCTTGGCCAACCTGCCCCTGCT
ASCRP005025	0.234369	0.0668	-2.00873	-4.533	-0.228462	hsa_circRNA_104775	ACGCAACAGAAGAAGAGTGAAGATAGTCCAAGTCCTAAGAGACAGC
ASCRP002690	0.234369	0.0671	-2.00647	-4.53656	-0.201109	hsa_circRNA_102371	AAGGTTACAGGAGTTCATGATCAAGTGTTGCCCACACCAAATGCTT
ASCRP001682	0.234369	0.0671	-2.00593	-4.53741	-0.238407	hsa_circRNA_101323	TAAGAGAGGCCCTGTTCCGCCATGGAGTCATAGTTGCAGCTGACTC
ASCRP004619	0.234369	0.0672	2.00509	-4.53874	0.25824	hsa_circRNA_104357	CTTCCTGAAGGGCTCTCTTTACCTATGAAGGCAACAGCAATGACAT
ASCRP002385	0.234369	0.0672	2.00508	-4.53876	0.390011	hsa_circRNA_102050	CGGACATTTTACATGACTTCAGATTTTCCTGTCCTTGATCCCAGCT
ASCRP001292	0.234369	0.0672	-2.00488	-4.53906	-0.329703	hsa_circRNA_100919	ACATGGGGAGGGCAACTACACTTTCCAATGCAGTGTCTTCCCTGGC
ASCRP001945	0.234369	0.0673	2.00443	-4.53977	0.522698	hsa_circRNA_101595	CACAACTCCTTGGTCTCACGTGTGAAACATGGCTACAGATTGGCTG
ASCRP005171	0.234369	0.0674	-2.00357	-4.54113	-0.390984	hsa_circRNA_104924	ACCTTCCCAGGACCAGTCCACCATGCCTGAAGTCAAAGACCTCTCA
ASCRP004980	0.234369	0.0676	2.0015	-4.54438	0.262449	hsa_circRNA_104730	CCTGGGAAAGGCTTATAACCCACACCATGGATAACTTATTGGACTT
ASCRP005197	0.234369	0.0677	-2.00113	-4.54497	-0.321361	hsa_circRNA_104950	TGCTGGATGGAGTGAAGACTCTCAGCGTTCTCATCTCTCTTCCTTC
ASCRP001664	0.234369	0.0678	2.00065	-4.54572	0.865543	hsa_circRNA_101305	CTCGGGGTGACAAAGAAGCTGAAAATGTGTGTCTGACATGCAAGCT
ASCRP003803	0.234369	0.0678	-2.00036	-4.54617	-0.386239	hsa_circRNA_103505	TGTCAGTCTGCAGCTACTCAGCTGATTTTCACACCCGCTACCACTG
ASCRP001625	0.234369	0.0678	-2.00007	-4.54663	-0.698454	hsa_circRNA_101263	AAAGTCCTTCTCAAGATTCGGATTATCGAGATTGCAGCCTGTCACT
ASCRP002376	0.234369	0.0679	1.99971	-4.54719	1.18721	hsa_circRNA_102041	GCGAAAACACAGATGGTGATGGAATTTCCTGATAATGTGTTAAATC
ASCRP004930	0.234369	0.0679	1.9996	-4.54736	0.434132	hsa_circRNA_104677	ATGGATATGCAGATTTGGAGGCCAATCACTGCCACCTTTTATTTCC
ASCRP001494	0.234369	0.0679	1.99936	-4.54775	0.739562	hsa_circRNA_101127	AACCATATCTGGAAGGGTGTACTCTGTGTGACCGCGCCTATCCCTC
ASCRP005088	0.234369	0.0679	1.99922	-4.54797	0.238777	hsa_circRNA_104840	TTGTTGGATGCTACATGATCGCCTTTGTTTTGCCATTCTCTACAGC
ASCRP001028	0.234622	0.0681	-1.99798	-4.54992	-0.213063	hsa_circRNA_100654	ACTCAAGGGAACGGGGACACTTAGTCGGTCTGGATGAACCAGCTTC
ASCRP004186	0.236053	0.0686	-1.9939	-4.55631	-0.338096	hsa_circRNA_103906	AGTCCACCAGCAGTCCTAGAGTCTGCACCAGCGGACCGAGCAGGAG
ASCRP003212	0.23617	0.0687	1.99299	-4.55775	0.311589	hsa_circRNA_102904	AAATGTGGCAGTGTTTCCAATACTTATCTACAGGAATCGCCATGAC
ASCRP000341	0.236775	0.069	1.99064	-4.56143	0.657054	hsa_circRNA_001838	GAAATGAGACATTGTTTTCCTACTGTTTGTTGGTGGCATACTTTGT
ASCRP001588	0.236775	0.069	1.99028	-4.562	0.876328	hsa_circRNA_101225	AATACAGGAGGCTGCAAGGTGTGACTGTTGTAAATCTCAAGGAACT
ASCRP001272	0.237102	0.0692	-1.98887	-4.56422	-0.619058	hsa_circRNA_100899	TGCCTTGAGGGTGCTTGAAGTTTCTGGGAAGTCGGCATCCAACCCT
ASCRP001727	0.237739	0.0695	-1.98612	-4.56852	-0.851797	hsa_circRNA_101368	AATCTCTCCGCATGTAGAGCGCATGAAGTACAGGACAATAAAGCTT
ASCRP004262	0.237739	0.0695	1.98609	-4.56857	0.338024	hsa_circRNA_103982	TGGCTGGGAAAATACATATGAACCAGATGGTTACAACCCAGAAGCT
ASCRP001764	0.238814	0.0699	1.98271	-4.57386	0.498713	hsa_circRNA_101405	GCCACTGATGGTGGATGTTCCCAAGGCCTTGATTATTGTTGCAGTT
ASCRP001755	0.238814	0.0701	-1.98175	-4.57536	-0.465767	hsa_circRNA_101396	TGAAACGCTTTTTCCAGCTCTCATTTACTCCTACCTAATCTGGGAG
ASCRP003402	0.238814	0.0701	-1.98154	-4.57569	-0.180541	hsa_circRNA_103098	TCCCAGCAAGGGCCGAGCCACGTGTCCATGCAGCAGACGGCGCCTA
ASCRP003231	0.238814	0.0702	1.98096	-4.57659	0.555413	hsa_circRNA_102923	ATACTCCACTGTGCGACAGTTGTTACATTATATGCCACTCTAGGAG
ASCRP000755	0.238814	0.0702	1.98019	-4.5778	0.261647	hsa_circRNA_100370	CTATCTACAGACACGTTGGTCGTCATTGCCTCCGAGCCCACTTTAG
ASCRP004857	0.238814	0.0703	-1.97976	-4.57847	-0.486914	hsa_circRNA_104604	TGTAGACAAACGAAATGTACATCAAAACATTCACCCAGAAAACCAG
ASCRP000091	0.23963	0.0706	-1.97706	-4.58269	-0.3655	hsa_circRNA_000653	GACCCCGCAGGTCTGGCGTGGACTCCAGCCTCATCACCGTCAGATC
ASCRP002651	0.23963	0.0707	1.97649	-4.58359	0.495342	hsa_circRNA_102332	AGCTCCTTGATGTGTAGCTGCGTTTGCTGTATCTGCTGTTGCTTCT
ASCRP001724	0.23963	0.0708	1.97596	-4.58442	0.191389	hsa_circRNA_101365	TATGACCTCAAGGGCACTCCAGTGTTTGTCCATGCTGGCCCGTTTG
ASCRP001441	0.240037	0.0711	1.97364	-4.58804	0.280569	hsa_circRNA_101073	TCTCTGCAGGCTCTTCAACCTTTCAGAGAAAAGGCATGACCTGACC
ASCRP001827	0.240037	0.0712	1.97279	-4.58936	0.187382	hsa_circRNA_101476	CTGCTGTCCTCAACATGGAGGAATCTGAAAGAAATTACAGTATTTA
ASCRP002009	0.240037	0.0712	-1.97271	-4.58949	-0.34931	hsa_circRNA_101661	CTGCCCTTTGGCTACTTGAAATTGACATTTCCAGCAACAAGTTGTC
ASCRP002130	0.240037	0.0712	-1.9725	-4.58982	-0.565575	hsa_circRNA_101784	ATCCCCGACCTCAGGAGAAAGTGTTGATCCAGTCCCCTGTGACAAC
ASCRP000422	0.240582	0.0714	-1.97059	-4.59279	-0.272187	hsa_circRNA_100032	TCTGAATGCACTGAACACAGAGGCTGAACAGTACCCAGGGGGAGAT
ASCRP000010	0.241441	0.0718	1.96778	-4.59719	1.04714	hsa_circRNA_000094	ACATTCGCAGGTCTTTCACTACCATTCCTACAGTGATTGGCAAGAT
ASCRP003765	0.241441	0.0719	-1.96733	-4.59788	-0.215199	hsa_circRNA_103467	ACTTAAGCAGATATGGGACACAGCAGGACAGGAACGGTTCCAGTCT
ASCRP004255	0.242816	0.0723	-1.96349	-4.60387	-0.256767	hsa_circRNA_103975	TATTCTACCGCAGCCAGAGGACATGGCATGAGCCAGAAGGAGAGCT
ASCRP000195	0.243278	0.0726	1.96133	-4.60723	0.419161	hsa_circRNA_001082	AGGCTGAAGGGCTGGGACTGAGGCTCTGGGGGAGTCAGGACCTTGA
ASCRP004947	0.243278	0.0726	-1.96117	-4.60748	-0.426416	hsa_circRNA_104695	TTTACATTAACCTTCGACAGGTGCCCTCACCACCAATGGCATCAAC
ASCRP002105	0.243493	0.0728	1.96005	-4.60922	0.765331	hsa_circRNA_101759	AAGGTGGATGTGATTGCCAAGCGTGTGCTGGGACTGCACCTCCAGC
ASCRP002611	0.243552	0.0729	1.95929	-4.6104	0.267731	hsa_circRNA_102292	TTGTGTTGGTAATGAAGAAAAGTCCCAGGTGCTGTTCCCACTGAAT
ASCRP004530	0.244499	0.0733	1.95578	-4.61586	0.368956	hsa_circRNA_104259	CTCATCAAATTACTCAGAGTTTGACCTTGTCTGTGTCAATGCGTGG
ASCRP001146	0.244499	0.0735	1.95427	-4.6182	0.217231	hsa_circRNA_100772	GTTCAGCCTATTCCTTGTTGTATATAATGAACAGATTCGTGATCTC
ASCRP000424	0.244499	0.0736	-1.954	-4.61862	-0.445964	hsa_circRNA_100034	GAATGCACTGAACACAAGTAAGAGGGACCATCTCCTCATGAACGTC
ASCRP003470	0.244499	0.0736	1.95385	-4.61886	0.221532	hsa_circRNA_103169	GTGGAAATACGTTACGTTTTTCTCTCGTCCCAGCTGTGTGGACAGT
ASCRP005117	0.244499	0.0737	-1.95288	-4.62036	-0.229826	hsa_circRNA_104870	GGTCTTAGAGAGTTGTGGAAAGTAAAAATGTAGCCCTACCAAAAGG
ASCRP002099	0.244499	0.0737	1.95288	-4.62036	1.46048	hsa_circRNA_101753	GTGGAAAACGTGGTATGTGTGCAACAGAGAGAAATTATGCGAATCA
ASCRP003823	0.244499	0.0738	-1.9525	-4.62095	-0.381348	hsa_circRNA_103525	GGCCACGCAGGTGTGGAAATTAAAAGAACACACATATTTTGACTGG
ASCRP005326	0.244499	0.0739	-1.9516	-4.62236	-0.488964	hsa_circRNA_400030	GCCCAGCGGGCCAGCTCCCAGCCCAGGGCCTGTCTGAATTAACCCG
ASCRP000716	0.244499	0.0739	-1.95155	-4.62243	-0.315124	hsa_circRNA_100331	TAACAGTTGCTGCCGCCGGAAGTACAGCTTTGCTTGTGCCATCTGC
ASCRP004132	0.244913	0.0741	-1.94997	-4.62488	-0.178051	hsa_circRNA_103842	CAGAACACAGAATATCCTCCGAATCCTAAATCTAGAGCTCCAAGGA
ASCRP002598	0.245271	0.0743	-1.94853	-4.62712	-0.212521	hsa_circRNA_102270	GAGGACAGCTCATGAGACAAGCAGGGTCATCCGAGAGTTGGCTGCG
ASCRP001940	0.246357	0.0747	-1.9454	-4.63196	-0.355967	hsa_circRNA_101590	ACCATCACAGGCAGGGGCAGCCTTCCACCACGGGGAGCCCAGCTGT
ASCRP003465	0.246359	0.0748	-1.94479	-4.63292	-0.685123	hsa_circRNA_103164	CTGTCTGCAGACCTCCCGACCTCTTTTGTGAAGGAGATCCATGATT
ASCRP002773	0.248939	0.0756	-1.93825	-4.64305	-0.342041	hsa_circRNA_102455	GCTCAATAGGTCCTTTGATGTGGGCCACAGCTTTCCCATCACTGGG
ASCRP001633	0.249259	0.0758	-1.9369	-4.64512	-0.432842	hsa_circRNA_101272	CATGGCAAAGTCTCCAAACGTCCACAACTATCCCGATATGGAAGCC
ASCRP003936	0.249893	0.0761	-1.93485	-4.6483	-0.450291	hsa_circRNA_103642	GGAACTACAGAAAGTGACTGAGACCGAAGATGATAGTGATAGTGAC
ASCRP001296	0.251174	0.0766	-1.93132	-4.65375	-0.267971	hsa_circRNA_100923	CCAGACCTTTCACAGACTTAATTCAGTGCACAAATGAGATGAATGT
ASCRP001065	0.25121	0.0767	-1.93002	-4.65576	-0.424183	hsa_circRNA_100691	AATGCATCCATGTGATGAGAAACGGCTCCCACATCTGCATATTCAT
ASCRP003107	0.25121	0.0768	1.92961	-4.65639	0.394889	hsa_circRNA_102798	AGCCAGTCAGGGACAGTTGCCGTTTGCTGTTGTGGGAAGTATGGAT
ASCRP000614	0.25121	0.0768	1.92942	-4.65669	0.255223	hsa_circRNA_100226	TTTTGTTGGCAATCTCTTCTCTGAAAGCTGAATTAACTAGTCAGGA
ASCRP002444	0.25205	0.0771	1.9269	-4.66057	0.163757	hsa_circRNA_102111	CAAACCACTAGTTATACAGATCACAATCGAAGCAATGAAAAGTGAC
ASCRP004439	0.252701	0.0775	-1.92435	-4.6645	-0.663226	hsa_circRNA_104166	TGTCCTCTCTTCGTAAAGATTGAAAAGGAACTCAGTGGCATGTACC
ASCRP004720	0.252701	0.0776	-1.92351	-4.6658	-0.301802	hsa_circRNA_104466	GAACACCCAGAATGGCAACATCACAGAGCTCCTCCTGAAGGAAGGT
ASCRP003361	0.252701	0.0777	-1.92265	-4.66713	-0.953268	hsa_circRNA_103056	TACCTCCCAGGTGAACAGCATGAAGGAGCTGTACTTGCTGATGGAG
ASCRP002398	0.252701	0.0778	1.92246	-4.66741	0.183748	hsa_circRNA_102063	ACTGCCTGTCCCTGATATCCAGGAGGTGCAGGGCTACGTGCTCATC
ASCRP001577	0.252701	0.0778	-1.9224	-4.66751	-0.276816	hsa_circRNA_101214	CCCACACCAAGAAAGCATGCTTTATTGTCTTCAACGCTGCCAAGCC
ASCRP000210	0.252888	0.078	1.92076	-4.67003	0.819893	hsa_circRNA_001143	TGAAAAATAAGTGAGTGTGGCTTACACATGTATTTCCTGATCATTT
ASCRP002380	0.252888	0.078	1.92037	-4.67063	1.2508	hsa_circRNA_102045	TGAGATTGAGAAACATGGTGGTGGCTTTGAAGGAGCTGTCTATTCG
ASCRP004855	0.252888	0.0781	1.91981	-4.6715	0.225868	hsa_circRNA_104602	TACACAGGAGCACCAGTTGCTTCTTGGTTTATATCTCCACTGTTGT
ASCRP002903	0.252888	0.0782	-1.9193	-4.67228	-0.47062	hsa_circRNA_102590	TGACGGCATCCCACCGCCCTACGACAAGGTATGCTGCCCCACAAAA
ASCRP005390	0.252888	0.0783	-1.91821	-4.67397	-0.247623	hsa_circRNA_400097	GCAGCCAGGCCCCTGGCAGACCCCAGCAGCTCCTGTGAGCCCTGCA
ASCRP005015	0.252888	0.0784	-1.91785	-4.67451	-0.399628	hsa_circRNA_104765	TGGACAACAGAAGACTGGACTGAAGATGATTTGGACGTGGCAGAGG
ASCRP004383	0.252888	0.0784	1.91776	-4.67465	0.945603	hsa_circRNA_104110	ATTTGCCAAGTGTGTAAATATGTTGCTGTGGAGCTGAAGTCAGCCT
ASCRP004285	0.253104	0.0785	-1.91668	-4.67632	-0.212892	hsa_circRNA_104005	AGTACGTGTGCCCAGTACCCTCAACAACAACAACATCAGTCGCATC
ASCRP004140	0.253131	0.0787	1.91571	-4.6778	0.323449	hsa_circRNA_103851	TAATACTGAAGGTGTCCAAAGACAGGAGGTGGTCTGTAAAAGGTTG
ASCRP001052	0.253131	0.0787	1.91542	-4.67826	0.189079	hsa_circRNA_100678	AACCTCTTTATAACATAAGCGCCTGATTAATCTCTCTGAGCTGACC
ASCRP001108	0.253314	0.0789	1.91441	-4.67981	0.30424	hsa_circRNA_100734	ATGTTCGCCTTCAACCTGCTCTTCTGGAGCTTGGGGCTTCCTTGGT
ASCRP000348	0.253468	0.079	1.91346	-4.68126	0.194416	hsa_circRNA_001896	CGTGAGGATGAGTGTCCTCATTTCTCAATTTGCTCTTCATATTAAT
ASCRP005224	0.253792	0.0792	1.91199	-4.68352	0.443594	hsa_circRNA_104977	CACCGTGAAAGATTTCCGTGAGGGTGGAAGAAAATCATACCATATC
ASCRP004629	0.253792	0.0793	-1.91153	-4.68422	-0.323479	hsa_circRNA_104367	AGATGTCATGGGCGGGAAAGGACGCATAGGAGTGGTCATATCATCC
ASCRP002765	0.253961	0.0794	1.91056	-4.68572	0.83483	hsa_circRNA_102446	AGCCTGTGGTGGTCTTGGTGAAGAGTAACAACCTGACGGACCGCAT
ASCRP002803	0.254468	0.0796	1.90882	-4.68839	0.28698	hsa_circRNA_102486	ACAACATCAAGGCTCTCTTCCGCAAGGGCAAGGAGCCCATACATCC
ASCRP001206	0.255324	0.08	1.90631	-4.69225	0.580599	hsa_circRNA_100832	ATACTTCTTCCTAAGCCCAGGCTGGCTGGCTGCAGCATGACTTTGG
ASCRP002591	0.256754	0.0805	-1.90251	-4.69806	-0.198966	hsa_circRNA_102263	CTCATGAGACAAGCAGGCCGCCTTCCAGGAGAATGTGGGGAGACAG
ASCRP001235	0.256932	0.0807	-1.90152	-4.69958	-0.271807	hsa_circRNA_100861	GCTCGTTCCGCCTCGCCGCTCCTGCTATTTGCCAACCGCCGGGACG
ASCRP005184	0.257762	0.0812	1.89769	-4.70545	0.684662	hsa_circRNA_104937	TGACACTGGCAGATCCATCGAAGCAAGGTCTCGCTGTGTTACCCTG
ASCRP000737	0.257762	0.0813	-1.89675	-4.70688	-0.501405	hsa_circRNA_100352	ATAATAAAAGTAAACGGAGTTCCCTCTCGAAGTCCAAGATTAGTTG
ASCRP003252	0.257762	0.0813	1.8967	-4.70696	0.803115	hsa_circRNA_102945	TTGCCCTGGGGAAGAGAGGATGGTGATGCACCGGTTACAAAAGATG
ASCRP001505	0.257762	0.0813	1.89658	-4.70714	0.654581	hsa_circRNA_101139	AAGTTGTCTGGTGAATCTGTCTCTGTCATCAAGCACACTGATCCCG
ASCRP003240	0.257762	0.0814	-1.89646	-4.70733	-0.245055	hsa_circRNA_102933	GAGGAGCAACAGGTCTGTAAACAGATTTGGCTAGGATTATTTGATG
ASCRP001544	0.257762	0.0815	1.89575	-4.70841	0.161252	hsa_circRNA_101181	ATTGGCTTCTCATGGATGGCATCCAAACAATTGACTCTACCCAGGC
ASCRP000111	0.257762	0.0815	-1.89552	-4.70876	-0.409133	hsa_circRNA_000754	CGGGACCCCGGCCCAAGCCCCGTGCGGCAAGGGAGCGAATGAGCGA
ASCRP002418	0.257855	0.0817	-1.89423	-4.71073	-0.341134	hsa_circRNA_102083	ATCATTCACCCTTGGCACACATGATTTTGAAGTCAGAGGAGATGTG
ASCRP000881	0.257855	0.0817	1.89414	-4.71087	0.772817	hsa_circRNA_100499	AACCACTCTGGAATACTTGCTGGCTGGGGCAGATATCATTGAAACA
ASCRP003428	0.258574	0.082	-1.89195	-4.71422	-0.392846	hsa_circRNA_103124	TACTTTAAAACCACCAAACACAACCTCCAAGAGGGAAAACATTTCT
ASCRP003040	0.260149	0.0828	1.88629	-4.72285	1.20071	hsa_circRNA_102728	AATGGAAGATGGTGGTTTTTAGATCGTATGGCTGATGACGACTGGT
ASCRP002800	0.260149	0.0829	-1.88606	-4.7232	-0.442323	hsa_circRNA_102483	AAGGCAAGGCAGCTGTTCTGAAGACGCATCTTCTCTCCAGACTGCC
ASCRP000854	0.260149	0.0829	1.88603	-4.72326	0.269258	hsa_circRNA_100471	AAACTTCAAGGTTCAGTCCTCAGTGGCTGTAGGAACTCCAGATTAT
ASCRP002204	0.260149	0.0829	1.88562	-4.72387	0.843209	hsa_circRNA_101861	AGGTCTGGCTGTTTATTGATGAGATATGTGTTGAGACGGATTCTCC
ASCRP003478	0.260149	0.0829	-1.88553	-4.72402	-0.238169	hsa_circRNA_103179	TTTCTTCAACACCGAAGCCAGGACAGCACAGCCGTAGCACTCTCAG
ASCRP001349	0.260229	0.0831	-1.88403	-4.72631	-0.412578	hsa_circRNA_100978	TGCCATTCAGCATTTTAAGAAAGAAAGATGGATCAACCTAGTGGAA
ASCRP002609	0.260229	0.0832	1.88382	-4.72662	0.24389	hsa_circRNA_102290	TGAGCTGTTTTCCAAGATTGCTATGCTATGCCTTGTATGACTAAGA
ASCRP004905	0.260229	0.0833	1.88327	-4.72746	0.741894	hsa_circRNA_104652	CTGGGTGTTTGGCTGACTGAGTTGAATACCTTCTTCTTGAAGCATA
ASCRP005083	0.260229	0.0833	-1.88292	-4.728	-0.266544	hsa_circRNA_104835	TAGCAGCTGGCCTACCGATGTTCACCGTGCTCAGGAAATTCACCAT
ASCRP005002	0.260229	0.0835	1.88185	-4.72963	0.29842	hsa_circRNA_104752	AAGTGTGCGGCAAGCCTCTGCCTTGTGGTTCCTTAGTCTCTGCCAT
ASCRP003230	0.260229	0.0836	1.88119	-4.73063	0.593001	hsa_circRNA_102922	TACGGTCCTGTTGGTGATGTATATTGGCCAAGTGGCCAAGGATGTC
ASCRP004660	0.260229	0.0836	1.88082	-4.73119	1.36758	hsa_circRNA_104400	CCAGCAGAAGGTGGTCGTGTGATGGTAACAGATGCTGACAGGTCAA
ASCRP000224	0.260229	0.0837	-1.88044	-4.73176	-0.305398	hsa_circRNA_001200	AGAATGGACGCATCCTACAACCACAGTTGCTAACAGTATGAGTTCT
ASCRP000122	0.260229	0.0837	1.88009	-4.7323	0.223064	hsa_circRNA_000792	TGCTTGTAAAAAGAGGGCCCTGGTGGTTTCCCTATAGTCTCTAGGG
ASCRP002534	0.26206	0.0844	-1.87548	-4.73932	-0.2311	hsa_circRNA_102206	CCTCCTCAAGAGTGGAGGCATACCAACGTTTACAAATCCAGCAGCA
ASCRP002227	0.26354	0.085	1.87133	-4.74562	0.219045	hsa_circRNA_101885	TGCATTGAACTTCCTCACGTACCTGTTTTCACGAGAAAACAGCATC
ASCRP001256	0.26354	0.085	1.87108	-4.746	1.10503	hsa_circRNA_100883	CATTATGAAGTGTGTGGACCAGTTGACAAAGATCCAAACTGAATTA
ASCRP000240	0.264612	0.0855	1.86816	-4.75043	0.759858	hsa_circRNA_001264	GCTTCACATGGTTTTAAAATGTGCTGCTGTGGTTTGACCTAGAGTA
ASCRP005096	0.265714	0.0859	-1.86519	-4.75494	-0.396462	hsa_circRNA_104849	TGAGCATAAGACTCATCATATTCAGAGCCCCCAGATGTTCAGCAGC
ASCRP004979	0.265714	0.086	1.86461	-4.75582	0.186454	hsa_circRNA_104729	CAAGTGTACGGTCCCTTATTTCGCGTGAGTCTTTGGCGTCCACGAC
ASCRP004278	0.26681	0.0864	-1.86166	-4.76029	-0.759979	hsa_circRNA_103998	GCAGATTCATTTATACAGCAGCTACTCCCTGTATCAAAGCCATCAG
ASCRP000892	0.266923	0.0866	-1.86083	-4.76154	-0.314808	hsa_circRNA_100510	AGCCATACAGCTCACCATCTGCTACCTGGATATGCTGATGACCAGT
ASCRP000500	0.268641	0.0873	-1.85612	-4.76867	-0.241478	hsa_circRNA_100110	TATCCAAAACAGGATCTATCTGGTTCAATAGATGACCTCCCCATGG
ASCRP003062	0.268641	0.0873	1.85597	-4.76889	0.641812	hsa_circRNA_102750	TCCTTCAAGTGAACAATTGGTGATGGCTTGGACAACAGTGTAGCTT
ASCRP001809	0.269482	0.0877	-1.85359	-4.77248	-0.309849	hsa_circRNA_101458	CTCCGACGTCTCATAAGCTTGCATTCACAAGAGATGGGCTCTGTGG
ASCRP002944	0.269558	0.0878	1.85285	-4.7736	1.11261	hsa_circRNA_102631	AAGATCAGTGTGTGGAAATCAGCCTAGAGGCAACCAAAAACATGGT
ASCRP003804	0.270985	0.0884	-1.84894	-4.77951	-0.388177	hsa_circRNA_103506	TGTCAGTCTGCAGCTACTCAGATCAACCTCTCCACTTCTCCTACAC
ASCRP003977	0.270985	0.0885	-1.84829	-4.78048	-0.372192	hsa_circRNA_103683	AATCCCAGTACAAACACTCAGCCTCTTCAGCAAGATTGCTAAGAAG
ASCRP000539	0.270985	0.0885	-1.84807	-4.78082	-0.252845	hsa_circRNA_100150	TTTCATTGTCCAAGCACCCTCAGATTTGGATCATACAGCAGATGTC
ASCRP004010	0.271349	0.0888	-1.84643	-4.78329	-0.147016	hsa_circRNA_103719	TATTCTGGATTCCAGCAGTATCCTCAAGTGTTGACAGCTCTTCTAC
ASCRP002253	0.271349	0.0888	1.84615	-4.78372	0.3333	hsa_circRNA_101911	TGATGGGCCTGCTGTCGTCACATCTGACCTCAAATGATCCTCCTCC
ASCRP000274	0.272012	0.0892	-1.84326	-4.78807	-0.368887	hsa_circRNA_001426	TGCAGGCAGCGCAGGGTAAGGAAGAAGTTCCAGTTGTTGCTTTTAT
ASCRP000991	0.272012	0.0893	1.84313	-4.78827	0.469951	hsa_circRNA_100616	TCATGAATATCGCGGGCCTCATCCGCACAGACAGCACCGACTTCTT
ASCRP001110	0.272012	0.0894	-1.8423	-4.78951	-0.217003	hsa_circRNA_100736	CCCATCACAGGCAAAGTTGGCCAAGAATTACGGCATGACCCGCATG
ASCRP003963	0.272012	0.0894	-1.84197	-4.79001	-0.514692	hsa_circRNA_103669	CAAGCGCCAGCTCCTCTACTAGTGACCTCTCCAACTATGACCATGC
ASCRP002194	0.272012	0.0895	-1.84187	-4.79017	-0.211594	hsa_circRNA_101851	GTTGCCACCAGTCAAGTTCATCCGAGAAGTAACACCATATATCAAG
ASCRP005274	0.273244	0.09	-1.83868	-4.79496	-0.175532	hsa_circRNA_105027	AAAGATGCAGGTGCTCTCCCGTTCTCTGCTGGCTCCCTTCTTGTTT
ASCRP001767	0.273244	0.09	-1.83811	-4.79582	-1.03302	hsa_circRNA_101408	AGTTGTTTTGCCAAACCAGATCTCCCTGGAAGAGAACATTTTGGTC
ASCRP004236	0.273737	0.0904	1.8358	-4.79929	0.202039	hsa_circRNA_103956	AACCAAGAAGAGCCAGAAAATTACTTGGGGCACACAGCAAAAAATG
ASCRP000150	0.273737	0.0904	1.83553	-4.79969	1.288	hsa_circRNA_000911	AAACATCACTATGGCTGGTGAACGTGTGTGCTGGTGTCCCTGGGCA
ASCRP002397	0.273737	0.0905	1.83535	-4.79997	0.69235	hsa_circRNA_102062	CTTCGCCTGGGCTGGACCTGTCGGGACGACTGTAAGTATGAGTGTA
ASCRP000988	0.275101	0.091	-1.8319	-4.80514	-0.205403	hsa_circRNA_100613	TTCACTGTTACAGGTTCGAGACTATAAGAGGCTTACCCCCATTTCT
ASCRP003812	0.276348	0.0915	-1.82871	-4.80993	-0.800419	hsa_circRNA_103514	AATGATTCAGACTTGCAAGGTGATTGAAGATAGTACTGGAGTCCGC
ASCRP002108	0.276956	0.0918	1.82687	-4.81269	0.252421	hsa_circRNA_101762	AGGGACGTCCTCATTGTCCTCGTTTGCTGCTTTGTGGTGCACAAGC
ASCRP003931	0.277962	0.0924	-1.82326	-4.8181	-0.371304	hsa_circRNA_103636	TCTATGAATATGCAGATTTTCAGCTGAACTCTCATCTCTCAACACT
ASCRP002081	0.277962	0.0924	-1.82301	-4.81848	-0.380327	hsa_circRNA_101735	AGTTACGCAGGCCCAAGATTCCTACCAAACTCCTCAGAATCCTGGA
ASCRP005027	0.277962	0.0924	1.82288	-4.81867	0.456046	hsa_circRNA_104777	TATCACCTAACGCTTCAAGGTTACTGACTTTTTATGATGTTTGGTG
ASCRP004820	0.277962	0.0926	1.82209	-4.81985	0.199173	hsa_circRNA_104567	ACACATACGTCCACGATGCTTATGGCCTGTTTCCTGTGCCTGGTCC
ASCRP005046	0.277962	0.0928	-1.8206	-4.82207	-0.38513	hsa_circRNA_104797	ACAGAGACTCCATCAAGCAGCAACAACTCCAGGCCCAGCATTTATC
ASCRP000942	0.277962	0.0928	-1.82036	-4.82244	-0.71111	hsa_circRNA_100562	TTCTGCCCCCAGAACTAGTTACCTTATCCCATATCACACAACTGGT
ASCRP002178	0.277962	0.0929	1.8203	-4.82252	0.165867	hsa_circRNA_101834	CCAGGCTTGTAGGTGCTCAGCACAGTGGACTTTGTCGCCCCTGATG
ASCRP001615	0.277962	0.0929	-1.82022	-4.82264	-0.479817	hsa_circRNA_101252	TAGTGAGCAGAATTCAATTCGTCATAATCTGTCCCTACACAGCAAG
ASCRP001207	0.279102	0.0933	1.81728	-4.82703	0.315162	hsa_circRNA_100833	ACGTGTTTGTTCTGGGCGAATGGCAGCCCATCGAGGATGCCTTCCG
ASCRP004441	0.279332	0.0935	-1.8162	-4.82866	-0.705703	hsa_circRNA_104168	ATGACATTGCAGAACTGGTGGATGCGGGAAAGTGTTCTAATCTTAG
ASCRP002693	0.279332	0.0936	1.81567	-4.82944	1.18767	hsa_circRNA_102374	ATTAAACAAGGTGCATTGGATCGTTGTGTGATGGGGATAACAGCAG
ASCRP003598	0.280074	0.094	-1.81325	-4.83305	-0.252372	hsa_circRNA_103300	ATCCAGGAAGCTAACAATGCCCAGTCCAATGCCAGAGTACCTCAAC
ASCRP001069	0.280074	0.0941	1.81272	-4.83384	0.464717	hsa_circRNA_100695	TTCCAGAAACTCCAGGACCAGACATCCACGACAGCGATGGCAGTTC
ASCRP003486	0.280074	0.0941	1.81244	-4.83426	0.234837	hsa_circRNA_103188	TCATTGGCAAGCCCGGTGGTGTCTCCCTGTCCAAATGTGAGCCTGG
ASCRP004628	0.28027	0.0944	-1.81091	-4.83655	-0.349503	hsa_circRNA_104366	GGAGGACGTGGCTCCTCTGCTGAACAGCCCCTGGGCGGGAGACTCA
ASCRP004661	0.28027	0.0944	1.81091	-4.83655	1.29546	hsa_circRNA_104401	ACTATTGAAGGTGGTCGTGTGATGGTAACAGATGCTGACAGGTCAA
ASCRP003027	0.280308	0.0945	-1.81015	-4.83768	-0.340535	hsa_circRNA_102715	AAACCTGAAGAAGGGGCCTCTCTCTGGAACGCCTACCCAACTCCAT
ASCRP004729	0.280308	0.0946	-1.8097	-4.83834	-0.580267	hsa_circRNA_104475	CTTGGGAGAGGCTTCTCCCCCTGAAGTACGTGGAGCTACGAATCTA
ASCRP000507	0.28035	0.0949	-1.8077	-4.84132	-0.377059	hsa_circRNA_100117	CCTCCTTTTGATTGTGAAAACTGCTGAGAGAGACTTGCAATCCAGT
ASCRP000975	0.28035	0.095	1.80689	-4.84253	0.294634	hsa_circRNA_100600	TTTCTGATAAGGCAGCACACTTCTGCTTTTGTTCCTTCATCAGGAC
ASCRP004893	0.28035	0.0951	1.80629	-4.84342	0.554122	hsa_circRNA_104640	TGAAATGGTGTCTCCCAGTGCTCCAGACAATGAAACATCCAAATCT
ASCRP002246	0.28035	0.0951	-1.80628	-4.84345	-0.625166	hsa_circRNA_101904	GGACGGTCAGAGCCGATGATGAGCACCCCACCTCCTGCCAGCGAGC
ASCRP000594	0.28035	0.0952	-1.80584	-4.84409	-0.471706	hsa_circRNA_100205	TCCTTCCAAGTCACCTACTGCCACCTTCGAAAAACACGGAGAGCAC
ASCRP004296	0.28035	0.0952	-1.80584	-4.8441	-0.193716	hsa_circRNA_104021	GAAGATACAGAGACCCAGCTAAGTTCCTCTGAAACTTTTGACCTTG
ASCRP004372	0.28035	0.0953	1.80528	-4.84493	1.45302	hsa_circRNA_104099	ACATGCATCGATGTGGATGAGTGTGTGGAGGGGACTGACAACTGCC
ASCRP001268	0.28035	0.0954	1.80442	-4.8462	0.547344	hsa_circRNA_100895	TAAGCTACAGAAAAGAACGCTTGGTGTATGTTGGTATCAGTATTGA
ASCRP002094	0.28035	0.0955	-1.80378	-4.84716	-0.651335	hsa_circRNA_101748	CTCTCCCAAGTGCACTCACTCTTGAGGATGAGAAAAGAATGCTGTC
ASCRP000094	0.28035	0.0956	1.80355	-4.84751	0.255451	hsa_circRNA_000671	GTCCTTGGAGGTCCTTAGGGTCTTTCCTTCGTGGTCGCACACGGCA
ASCRP001889	0.28035	0.0956	1.80347	-4.84762	0.591855	hsa_circRNA_101538	GATGGTTGCCCTGGCAAAGGTGTGGATGAGGTCACCATTGTCAACA
ASCRP001576	0.280362	0.0957	1.80289	-4.84848	1.10461	hsa_circRNA_101213	AAGTATGTAGCTTGTATTGGTTGGTGATGGTGGTACTGGAAAAACG
ASCRP004082	0.281001	0.0961	1.80036	-4.85225	0.251612	hsa_circRNA_103792	GTATTCCCAGGGTTTCGAAAAAACGATGAAATGAAAGCTATGGATG
ASCRP001081	0.281001	0.0962	-1.79961	-4.85336	-0.346382	hsa_circRNA_100707	AGCCCACCAGGCGTTACTACAAGGAGACCTCTGGCCTGATGCTGGA
ASCRP003415	0.281001	0.0962	1.79957	-4.85343	0.383557	hsa_circRNA_103111	AAACACAGCCAGAAGGAAGTGTTTGGATTGTGAGCTATTTCAGAAC
ASCRP003577	0.281001	0.0963	1.79935	-4.85375	0.535893	hsa_circRNA_103279	GCCCTGGCTGGTGGAGGGAGCAAAGTCCTGCACACTGGAGTGGTGT
ASCRP002712	0.281808	0.0966	-1.79713	-4.85705	-0.476963	hsa_circRNA_102393	CCCGCCAACGCCCGACCCTGCCCGCCCTGGACTGGCAGCTGCCGTC
ASCRP005247	0.281862	0.0967	1.79646	-4.85804	0.270431	hsa_circRNA_105000	ATTTGGCAGAGGTCCTCCAGCAGCCTGACCTGAGTGGGTTAGTGAT
ASCRP003719	0.282153	0.097	1.79485	-4.86043	0.563115	hsa_circRNA_103421	AGTCAGCAGAACTGAAATAGGTGATGGATGTGGACACACTGTACTA
ASCRP001619	0.282153	0.0972	1.79391	-4.86183	0.301883	hsa_circRNA_101257	TATACACCAGCAGATTATGGTACTCACAGTTCTTTCCTGATCTTCC
ASCRP002297	0.282153	0.0972	1.79368	-4.86217	0.813619	hsa_circRNA_101957	ACTTATTTCAGGTGAAGGTGGTGTTTTTAAGGCTCATCTTACTTTC
ASCRP002435	0.282153	0.0972	1.79358	-4.86231	0.368904	hsa_circRNA_102101	ATGTATATTGTACACTCAGAAGAAGCCTTGTTTTTACTGGCAACCT
ASCRP001931	0.282153	0.0973	-1.79291	-4.8633	-0.301797	hsa_circRNA_101581	TTTGCAGAAGGACTTGAACGCAACTCCCAATTGCAGAAAATTGGCA
ASCRP002332	0.282153	0.0974	1.79255	-4.86384	0.418023	hsa_circRNA_101995	TGCGTCTCAGCTTCAATATCCGTACATTCCCCACAAAAAAGCACTA
ASCRP003487	0.282457	0.0976	1.79137	-4.86559	0.390439	hsa_circRNA_103189	CTTTGGGACCCAACTGGAAGCCGTGTGGTTTTGCCATGTTCTGTTC
ASCRP004863	0.282988	0.0979	1.78925	-4.86873	0.2039	hsa_circRNA_104610	CAAGAAGAAACATTCAGCTGATGAGTAAAGAATCTCCTGTCTCTGC
ASCRP001678	0.282988	0.098	-1.78918	-4.86884	-0.698387	hsa_circRNA_101319	CGGGGAGACAAGCAAATCTGACAGGATGGCATCTGATGACTTTGAC
ASCRP002652	0.283261	0.0981	1.78807	-4.87048	1.00643	hsa_circRNA_102333	GTCGGATGAGATGGAGTGGATGTTGAAGATGATCCGACTTGCTCTT
ASCRP000659	0.283684	0.0984	-1.78653	-4.87276	-0.273353	hsa_circRNA_100271	TATAGTACACTATCCAAACCAGCAGCACTAACAGGATCGGAAACTC
ASCRP001891	0.283684	0.0985	1.7861	-4.87339	0.393565	hsa_circRNA_101540	GCTAAAAGCTTCCATGAAGGTGTGGATGAGGTCACCATTGTCAACA
ASCRP001596	0.28488	0.0991	-1.78211	-4.87929	-0.372186	hsa_circRNA_101233	CCTTACGAACCGCACTAACTCTCCAACAATAAATACATTTGATAAG
ASCRP003092	0.28488	0.0992	1.78172	-4.87986	0.369089	hsa_circRNA_102782	ACACTCCTGCTTCCTTCCTTCCCTGCAGTTGGTGCTGAACCTGAGA
ASCRP000459	0.28488	0.0992	-1.78153	-4.88015	-0.273214	hsa_circRNA_100069	ACAGACTGGGAAGGATGCCCCTTACCTAGACCTGGCCCCCTACATG
ASCRP002770	0.28488	0.0993	-1.78093	-4.88103	-0.548983	hsa_circRNA_102451	TCCTCCCCATCGGACAAAGTATTTTGGACAGATATCATCAACGAAG
ASCRP004837	0.28488	0.0994	-1.78051	-4.88165	-0.19252	hsa_circRNA_104584	TTTTTCAGCTGGAAGAATTGCCCGGTCCCATATAGAAATCATCCGT
ASCRP004427	0.28488	0.0994	1.78036	-4.88187	0.187498	hsa_circRNA_104154	TTGAATTCAGCTTTCCAGAGTGTTGAATCTTCCACCAGAAAACTTG
ASCRP005132	0.28522	0.0997	1.77912	-4.8837	0.252661	hsa_circRNA_104885	ACAGCTGGAGAATCTTCTGCTGACTCTCAACTTTTCCTGGAAAAAA
ASCRP001846	0.287829	0.101	1.77325	-4.89236	0.389399	hsa_circRNA_101495	GCTTGACCCCTGCTGCAATTGGCCTCGAGCTGTGGCAGGTTTTCGA
ASCRP002665	0.288103	0.101	1.77195	-4.89427	0.22071	hsa_circRNA_102346	AGGTCTGCTTGGTATCAGCATGGAAGCCATGAGTGAGAATAAAATG
ASCRP005395	0.288103	0.101	1.7716	-4.89479	0.458047	hsa_circRNA_400102	GTGGTCTTGGCATAGGCTCATTCCCTGCCTTTGGGGTCTGGGCTCC
ASCRP002974	0.288382	0.101	1.77049	-4.89642	0.192966	hsa_circRNA_102661	ATTCATTTGGTCCTGGAAGATACTGCTCTTTGGTGTAATAAACTTG
ASCRP001285	0.288696	0.101	-1.76931	-4.89816	-0.364226	hsa_circRNA_100912	TTGGAATGCTGCAACAATGGATTCACTCCTTCTCCAGTTGCACAGC
ASCRP003748	0.288896	0.102	-1.76836	-4.89956	-0.332971	hsa_circRNA_103450	ACAGTAGAAGACCATGGGGGATGTGAAGCTGGTTGCCTCGTCACAC
ASCRP000964	0.292899	0.103	-1.75975	-4.9122	-0.278219	hsa_circRNA_100587	TGCCATCGTCACCCTGCATCCTCCAGGACAAATAGCAAGGAAATAC
ASCRP000206	0.294029	0.104	-1.75642	-4.91708	-0.248874	hsa_circRNA_001123	GGACCGAGTCAAGTCAAAGGAAGCAAAAGAAGACCTGATATTGAAT
ASCRP000408	0.294029	0.104	-1.75625	-4.91733	-0.741876	hsa_circRNA_100018	CAACTCTCTCTCAGACAAATTTACATGTATTGGAGACCAGACCAGA
ASCRP002141	0.294029	0.104	1.75587	-4.9179	0.27079	hsa_circRNA_101796	ACGGCTTGATGGCCTAAAGATCCCTCCTGGCTGTGAGCTGGTGGTC
ASCRP002933	0.294263	0.104	-1.75474	-4.91954	-0.191648	hsa_circRNA_102620	AACAGATAATGATCAGGTGCAGACCATGAATTACGTGGGGCAGTTA
ASCRP004829	0.294263	0.104	1.75431	-4.92017	0.229203	hsa_circRNA_104576	GTGATATCAGGGATATTCCAATGCCTTTAGTTAGCTCAGGAGTAGA
ASCRP004358	0.294687	0.104	-1.75175	-4.92392	-0.508558	hsa_circRNA_104084	AGAGCCAGCCAGGATCTGCATTTACTGCTCAACCACATCTAATTTG
ASCRP000779	0.294687	0.104	1.75174	-4.92393	1.13871	hsa_circRNA_100395	CCGTAGTGGATTGGTGGTTGGTGCAGTGGAGATGCCATTTCCAGTG
ASCRP002536	0.294687	0.104	1.75133	-4.92453	0.185465	hsa_circRNA_102208	ACAGCGTCATCTTGAGCGGGTCACCATGGCTGTTATTGGCTCCCTT
ASCRP004695	0.294687	0.104	-1.75131	-4.92457	-0.247932	hsa_circRNA_104439	CTTCCTGCGGGTACTAAGGTCTACATCGACCCCTTCACTTATGAAG
ASCRP000618	0.295349	0.105	1.74945	-4.92728	0.857062	hsa_circRNA_100230	GTTGATAGTGTGGTATTCATGGGTAGTTTGAAATATCCAGATGAGA
ASCRP002433	0.295925	0.105	-1.74733	-4.93037	-0.265438	hsa_circRNA_102098	CTGGCACGGAATGCAGTTTTTACATAAGTTAGATTTATCCTGCAAT
ASCRP001665	0.295925	0.105	1.74698	-4.9309	0.556426	hsa_circRNA_101306	CGCCAGTGCATCTTCTAGCTGAAAATGTGTGTCTGACATGCAAGCT
ASCRP000724	0.295925	0.105	1.74619	-4.93205	0.188901	hsa_circRNA_100339	TTGCTGTTACCTACTTCTTTCATCAGGAACCACGTGAATGTTGAGG
ASCRP002744	0.295925	0.105	-1.74615	-4.9321	-0.235881	hsa_circRNA_102425	TGCACTTTGGGGAGCCTAAGTCCTGGACGTGGCCCAGTGGAACATC
ASCRP002426	0.296013	0.106	-1.74513	-4.93359	-0.429582	hsa_circRNA_102091	ATGAACGACATGTACGCCTACCTCCTCTTCAAGGCCTGACGGAGGA
ASCRP000056	0.296013	0.106	-1.7449	-4.93392	-0.21606	hsa_circRNA_000486	CACGAACCACCCGCGCTGAGAATGAGCCCCGTGTGGTTGGTGCGCG
ASCRP004888	0.296879	0.106	1.74227	-4.93776	0.731773	hsa_circRNA_104635	AAGCATGCAATCGTGTGTTTTATGGACCATGTGCTGCTATGTATGC
ASCRP003718	0.296879	0.106	1.74167	-4.93864	0.550953	hsa_circRNA_103420	CTGTTATAGATAAACAAGGTGATGGATGTGGACACACTGTACTAGG
ASCRP003830	0.296879	0.106	-1.74157	-4.93878	-0.25564	hsa_circRNA_103532	ATCTCTGGGAAAGCCACAGTATCCGATCTCCAGTCTGGCTCAGCTG
ASCRP005120	0.297564	0.107	-1.73968	-4.94153	-0.995211	hsa_circRNA_104873	CCCCCAGCAGAAATTCTGACAAAGATTAATGATGTATCACTGTTTA
ASCRP004550	0.298391	0.107	-1.73675	-4.9458	-0.241711	hsa_circRNA_104285	GGTCATCCAGGCGGTGCGTCTTTCTACGTGAATAGGATTTTGTGGC
ASCRP001502	0.298391	0.107	1.73649	-4.94618	0.764098	hsa_circRNA_101136	AAACAAAGTCGTGTGCATGGCGTCCTTGGAGGATGAGCTGTGTGGC
ASCRP000167	0.298391	0.107	1.73644	-4.94625	0.674604	hsa_circRNA_000963	TGGGTGGTGTCGGGTAGGCCTCGCAATGTATTCAAGTTACTCCAGG
ASCRP002676	0.29863	0.107	1.73544	-4.94771	0.228425	hsa_circRNA_102357	ACTATCAGAGCCAAGTATCTTCAAGACCTTCTCATGGAGAGTGTGA
ASCRP005070	0.299452	0.108	-1.73328	-4.95085	-0.398337	hsa_circRNA_104821	TTTCATCCACCACATTACTTAGGTTGCACAGAGCATTGAGGATCAC
ASCRP004417	0.301077	0.108	1.72946	-4.9564	0.193594	hsa_circRNA_104144	AATTTGTAAGCGGAAGAAGTCCCTATAGAACCATACAACATCCCAC
ASCRP000915	0.301077	0.109	1.72864	-4.95759	0.183052	hsa_circRNA_100534	CTGATGTTGGGTTCTTCACGTACGGTAATTTTCCATTAGAACAGCA
ASCRP001231	0.301077	0.109	-1.72849	-4.9578	-0.167369	hsa_circRNA_100857	AATATGGTGCAGAGGCCCTCCACGGGAGTCGTCGCATGGTGGATGT
ASCRP004589	0.301732	0.109	1.72667	-4.96044	0.751979	hsa_circRNA_104326	AGGAAGTCTGACTCTATCAAGAAGAATATCTAATCCGTACCTTGAA
ASCRP001860	0.301749	0.109	-1.72605	-4.96134	-0.20589	hsa_circRNA_101509	AATTGATTGAGTCTCAGCCCTGGGGTACGGCTCCTCACTGGCATTG
ASCRP001815	0.301749	0.109	-1.72558	-4.96202	-0.343254	hsa_circRNA_101464	TTCGCCACAGAATCACCACGACAGCAGCATGCATGATGGACCTCAG
ASCRP000536	0.302336	0.109	1.7239	-4.96446	0.767065	hsa_circRNA_100147	TTGAGGCCAGTCTGGAGAGGTGTTGGTGAATGTTAAGGAGCACTCC
ASCRP000758	0.302868	0.11	1.7222	-4.96692	0.258909	hsa_circRNA_100373	TCAGCATGTTCCTATTCTGCTCTCTTTGCTGAACTCGGTTATTTCA
ASCRP001234	0.302868	0.11	-1.7218	-4.9675	-0.707908	hsa_circRNA_100860	CCGCTCACGGCCTCGCCGCTCCTGCTATTTGCCAACCGCCGGGACG
ASCRP003513	0.302998	0.11	-1.72073	-4.96904	-0.24867	hsa_circRNA_103215	CCCACCTGAGGGAGTACCTGACAGGCTTCCACAAGCGGAAGGTCGA
ASCRP001313	0.302998	0.11	1.72049	-4.9694	0.167866	hsa_circRNA_100940	ATTCTCCAAAATGTCAGCCATGAACCAGAGAATCAGTCAGAGTGCT
ASCRP000568	0.303149	0.11	1.71961	-4.97067	0.193825	hsa_circRNA_100179	TCAGTCTGGAGTCCATGCTGCCTGATGTCATTGACGACTTCCATCT
ASCRP001991	0.303149	0.11	-1.71914	-4.97136	-0.418199	hsa_circRNA_101642	ATCTTGGACCTCATCCAGCCAGAAGAAATTCAACAGCAGATTGTTC
ASCRP005049	0.304711	0.111	-1.71521	-4.97702	-0.393276	hsa_circRNA_104800	TTCACCTCCCAGGTGGGATTTGATCCACACCATCACATGCGTGTGC
ASCRP000463	0.304711	0.111	-1.71504	-4.97728	-0.414207	hsa_circRNA_100073	TGCATCGTTCACCAGATGCTGTCCCACACCCCAGATTCTACTGTGT
ASCRP002263	0.305026	0.111	1.71332	-4.97975	0.30841	hsa_circRNA_101921	ACAATCTACTCCTACGTCAGGCCAGAGAGGTTCTGCTCCAGACGAG
ASCRP002876	0.305026	0.111	-1.71314	-4.98002	-0.371189	hsa_circRNA_102563	ATGCCGCTGGGTGGGCCTTCACCTTGATCATCATCTCCTCCTACAC
ASCRP000880	0.305026	0.112	-1.71284	-4.98044	-0.60211	hsa_circRNA_100498	TGTACCACTACTCCACCTCAGTTTTCAGCTATAACACGGATTCCCG
ASCRP003579	0.305074	0.112	1.71152	-4.98235	0.21002	hsa_circRNA_103281	ATGCATCCTGATCCTACTATGTTGACAGACATGATGAAAGGGAATG
ASCRP001886	0.305074	0.112	1.71133	-4.98263	0.269725	hsa_circRNA_101535	TCATGAACAGGCTTTCCTTAAAGTTTCCCATGTCTCAATGGACTCC
ASCRP000803	0.305074	0.112	-1.71037	-4.98402	-0.438333	hsa_circRNA_100420	ACTACTGCTGCATTCCTACTTCATTGCCCCTGATGTAACTGGACTC
ASCRP005190	0.305074	0.112	1.71021	-4.98424	0.220906	hsa_circRNA_104943	TCAGTTATCATCTGGTGACAAAGCTTCAGTTCTTCAGTGCCCTACT
ASCRP001129	0.305074	0.112	1.71012	-4.98437	0.163899	hsa_circRNA_100755	AAGTGAAGACATTCCTGCCAGGTGCTGGCAATGAGCCCACACACAG
ASCRP001173	0.305271	0.112	1.70921	-4.98568	0.300338	hsa_circRNA_100799	TGGACCAGAGAACCCGGCAGTGGGCAGGTGTTTGTGACTTCAGAGA
ASCRP004473	0.305789	0.113	1.70718	-4.98862	0.877251	hsa_circRNA_104200	TGGAGCTTCTTGATATTGCGGTGGTGGAGATGAGCGATGCCTTCCG
ASCRP000084	0.305789	0.113	-1.70716	-4.98864	-0.285086	hsa_circRNA_000626	TGAGGGAGAGGTGGGACAGTGACCTGGGAGAGCTGAAAGTGGAGAC
ASCRP003329	0.30616	0.113	-1.70592	-4.99043	-0.599664	hsa_circRNA_103023	TGCACTGGTGTAAGCAATGGCATCAACCATTCTCCTCCTACCCTGA
ASCRP001141	0.306864	0.113	-1.70403	-4.99314	-0.200996	hsa_circRNA_100767	CCAATCCCAGCCACAGTCAGACTTGTTGGGGCTTATTCAGGTCATG
ASCRP005370	0.306958	0.113	1.70315	-4.99441	0.254668	hsa_circRNA_400076	TGCTGCACACCTAGGAACCTTGTGCTTGCCTGCCAGTAGGCACAGG
ASCRP000457	0.306958	0.113	-1.70281	-4.9949	-0.186519	hsa_circRNA_100067	GAGGATGCAGGCAACAGAACATTGAGGAAAACATGACAATAGCTAT
ASCRP000481	0.306984	0.114	-1.70223	-4.99573	-0.332923	hsa_circRNA_100091	AAGCAATCATCAAGCACCTCCTCGATGTCGACGTACAAGCGGGCCA
ASCRP004731	0.307465	0.114	-1.7007	-4.99794	-0.317329	hsa_circRNA_104477	AGTCACACAGGCATACCAATCCCATTGTGGAAAATGGACAGACTCA
ASCRP005111	0.307465	0.114	1.70008	-4.99882	0.426299	hsa_circRNA_104864	TCTGAAGACTGTGGTCATTGTGCTTGGTGGACGTCTGATTTATGAA
ASCRP004291	0.307465	0.114	-1.69974	-4.99931	-0.366679	hsa_circRNA_104016	CATCAACAAGTGTGAACGAGCTCTATGTCGATGACCCAGACAAGGA
ASCRP000144	0.307959	0.114	1.69827	-5.00143	1.18817	hsa_circRNA_000881	ATGATGGATGGGCCTAGTTTGCCTTTGAGTGTGTGTCTGTTTGGGG
ASCRP003032	0.308404	0.115	-1.69643	-5.00406	-0.500149	hsa_circRNA_102720	AGGCCACCCATTCAGTTGTTGACCTCCTGTACTGGAGAGACATTAA
ASCRP002937	0.308404	0.115	1.69612	-5.0045	0.182137	hsa_circRNA_102624	AGATCCTGCCTTTGCAAGTTTTAACGGTGACTCCCTGATGATCATT
ASCRP003137	0.308404	0.115	1.69585	-5.00489	0.822803	hsa_circRNA_102828	GAGTGGAAAGGTGATGATGAACAGTCTACACAGATGGCTGCAAGTT
ASCRP002284	0.309534	0.115	1.69307	-5.00889	1.15464	hsa_circRNA_101943	CTCGGATAAGTGTTGCTGTGGATGTATGGTCGACGCTGGCTGATTT
ASCRP003731	0.309534	0.115	-1.69222	-5.0101	-0.358839	hsa_circRNA_103433	GTACACACAGGTGACATCAGTTGCAAGGGGATGACCGAGCGCATTC
ASCRP004273	0.309534	0.116	-1.69212	-5.01024	-0.696417	hsa_circRNA_103993	GTCAAGTATGTAGCAGCTGATGTTCTAATCATGTCAGATAAAGATG
ASCRP002517	0.309714	0.116	1.69126	-5.01148	0.329521	hsa_circRNA_102189	TGAGAAGAAGGATCCCAAAATGGCTGGGCGAAAACTTGCTCTAAAA
ASCRP001226	0.310025	0.116	1.68933	-5.01424	0.602258	hsa_circRNA_100852	TGTGCTTGGCTCAGGAAAAGCTGGAACGGGTGATCCTAGGGAGTGA
ASCRP004324	0.310025	0.116	1.68876	-5.01505	1.32563	hsa_circRNA_104050	TATGCTTTACTGGGATCTTGTGTGTGATAATGCCTGGAAGGTCCAT
ASCRP005065	0.310025	0.116	-1.68843	-5.01553	-0.285813	hsa_circRNA_104816	GAAATGGCAGGTGGGTCTTCAAACAACTCTATGATAAAGGCCTTGT
ASCRP003450	0.310025	0.116	-1.68814	-5.01594	-0.546452	hsa_circRNA_103148	CCGCAAGCAGGCACAGCGTCACCTTCGTCCCCTCCGGAGCTGCACG
ASCRP004231	0.310025	0.116	-1.68767	-5.01661	-0.232535	hsa_circRNA_103951	TGAGAATGAAGAAAATACCCAGCACCCATATATCTCCCATCAGCAT
ASCRP004918	0.310025	0.116	-1.68756	-5.01677	-0.278658	hsa_circRNA_104665	AGGGTGCCAGACCTCATCACTCAGAACCGTGCTGCATACTATCCTC
ASCRP004602	0.310032	0.117	1.68697	-5.01761	0.208356	hsa_circRNA_104339	AGCCAAAATGGCCTGTCCCAGGCTCTCTATCTTCTCTGCTACATCT
ASCRP003108	0.310032	0.117	-1.68651	-5.01827	-0.303668	hsa_circRNA_102799	AGAAAACAAGCCAGTCAGCTCTTTCAGTCTCACATGGCAACGAAAA
ASCRP004871	0.3115	0.117	1.68302	-5.02325	0.363948	hsa_circRNA_104618	CACTCCAACAGCAACAGATCCCCTAATTTGTGGCTGAAAGATGTTC
ASCRP005260	0.3115	0.117	1.68256	-5.02391	1.21927	hsa_circRNA_105013	TGAAAGTTCTTCCAGGTGATGGTGAGGTAGTAGAACAGGTAATTGG
ASCRP001592	0.3115	0.117	1.68216	-5.02448	0.899777	hsa_circRNA_101229	CTGTGCACAGAATCGCATGTGTGAGTGCCCCTAGTGTTTACCAGAA
ASCRP004850	0.312753	0.118	-1.67912	-5.02881	-0.277578	hsa_circRNA_104597	AGCAAGATCACCGTGAGCATAGCTACCCCAAAACAGAAACCAAAAA
ASCRP000394	0.312753	0.118	1.67874	-5.02936	0.145307	hsa_circRNA_100004	AAAGTGGATGAGGAAAACTGTGAGCTGCTTGTCCCCATCCTGCGGC
ASCRP004449	0.312829	0.118	-1.67786	-5.03061	-0.184545	hsa_circRNA_104176	AGAGTCAAGCAAAGAATAAAACCCAAGACAAGCCACATAAAAGCAA
ASCRP000802	0.312829	0.118	-1.67757	-5.03103	-0.163413	hsa_circRNA_100419	AGAAGGACAGAGTTCAGCAAGACCAGCAGATTGGAAGTATCAAAGT
ASCRP000435	0.313595	0.119	-1.67557	-5.03388	-0.337952	hsa_circRNA_100045	ATCGACCAGGGGCGGCACCTTCCTACTTCTGCCCAGCCACAGCCCT
ASCRP004360	0.313595	0.119	-1.67509	-5.03457	-0.850097	hsa_circRNA_104086	TCTCTCCAGTGTCCTTACATCATGCCGAGCCTTCCTTGTAACAGCG
ASCRP001967	0.313889	0.119	1.67402	-5.03609	0.645826	hsa_circRNA_101618	GATGTGCAGGGTGTGCAACTGAGGAACATGGCTCAAGAAACTAATC
ASCRP004903	0.314026	0.119	-1.67324	-5.03719	-0.824513	hsa_circRNA_104650	CCTAACTCAAAGAGAGACATCTCCCCATACATTTCAATTAGACTTA
ASCRP000016	0.316372	0.12	1.66818	-5.04438	0.554692	hsa_circRNA_000162	CCTAACACAGTTTTAGATGGAGTTTGGCTTGGTTTTCTTATTCCAT
ASCRP002582	0.316372	0.121	1.66662	-5.0466	0.197213	hsa_circRNA_102254	TAACAGATCCAACTGTTTCCTGGTTATAAGTTGTCGCCGTGATCCT
ASCRP004764	0.316372	0.121	1.66659	-5.04665	0.564775	hsa_circRNA_104510	TTCAGTATGGTTATGAGGTGTTTGTCTTTGGTGCGCTCACAGAATG
ASCRP000116	0.316372	0.121	1.66596	-5.04754	0.956672	hsa_circRNA_000780	CTTAGGAAACCTGCTGTGGAGTGGGATGTCCTCTGTGTGCATCATG
ASCRP002184	0.316372	0.121	1.66579	-5.04777	0.266132	hsa_circRNA_101841	TGGCTGCTGCTTGCATATAGTTTATGTGGCCGAGGCAGACAAGTGG
ASCRP002952	0.316372	0.121	1.6657	-5.0479	0.377385	hsa_circRNA_102639	TTCTGCCTTGGTAATTCGTGCCTTTCTGCTCTTTCCAACAATTGAA
ASCRP002898	0.316372	0.121	1.66501	-5.04888	0.236381	hsa_circRNA_102585	AGAAAATGCAGGTTCACGCTTACATCATCAGCTACCTGAAGAAGGA
ASCRP003437	0.316372	0.121	1.66472	-5.0493	0.984089	hsa_circRNA_103134	ATGGTGATCGGTGGTATGTTTTTAGCCACAGGTAGTACTGATCATG
ASCRP001530	0.31745	0.122	1.66191	-5.05328	0.621123	hsa_circRNA_101167	AAGGAAGCAAGATATACATCAGGGGATGTGAGAGTGTGGGACACCC
ASCRP002183	0.31745	0.122	1.66113	-5.05438	0.662473	hsa_circRNA_101839	AAAGTGTGATGTTCGCGTATTTCTTGACAGAGTTTATGTGGCCGAG
ASCRP004167	0.31745	0.122	1.66095	-5.05463	0.585749	hsa_circRNA_103887	TCTTCCAAATGCACAGCTTGTGTTCAGGTGTGTCACGGGGTCCCAG
ASCRP002569	0.31745	0.122	-1.66059	-5.05514	-0.418448	hsa_circRNA_102241	GTGAACAATGAATTCAATTCGCCACAATCTCTCTCTGAATCGTTAT
ASCRP002637	0.31745	0.122	-1.66014	-5.05578	-0.254321	hsa_circRNA_102318	TACAGTATCCAAGTGGCAATAGGTAACAGAAATCCAGGACTGGAGT
ASCRP005101	0.317975	0.122	-1.65822	-5.0585	-0.27766	hsa_circRNA_104854	TCTTTTAATGCCCAAAGCAGTGTCCACACCAGCACCAGCTACAACT
ASCRP002214	0.317975	0.122	-1.65814	-5.05861	-0.203115	hsa_circRNA_101871	CATTATGACGCATCGTCCAGCCAAGCAGAGAAGGAGCTGACAGATT
ASCRP002346	0.318014	0.122	1.65716	-5.05999	0.168812	hsa_circRNA_102010	CCTCATAAACAGGTTTGAAATATCTCCATTCAGCTGGCATTTTACA
ASCRP003968	0.318014	0.123	1.65673	-5.06061	0.764004	hsa_circRNA_103674	AAAGTGGAGTGTGCCCGGGATGAGACTGTAGTCCGAGTCCCTGGAA
ASCRP004705	0.318014	0.123	1.65655	-5.06086	0.184159	hsa_circRNA_104451	TACAGTTAAGGGTCAGGTTCATGTCGCTTTAGTTATTCAGACCCCA
ASCRP002309	0.31899	0.123	1.65421	-5.06417	0.780275	hsa_circRNA_101969	AAGTCTTTGAGTGGCTGGCGTGGCTCACCGATTCCACAGTACTTGC
ASCRP004190	0.320493	0.124	-1.65089	-5.06886	-0.41873	hsa_circRNA_103910	ACCAGTGCAGGCTGTTCCACCTCCCAACTTCGAGATGCCAGTCTCC
ASCRP004103	0.323034	0.125	-1.6456	-5.07631	-0.295279	hsa_circRNA_103813	AATATTCAAGAGTGGCAACAGAGAGATCACTGCAGTTCTCCTGTTC
ASCRP000789	0.323034	0.125	-1.64515	-5.07695	-0.641527	hsa_circRNA_100405	ACTAAACTGGATGTGAAAGGACCACCCACCCACCGTCTGTCTTGTG
ASCRP004407	0.323982	0.125	1.64267	-5.08044	0.553724	hsa_circRNA_104134	AAAGCCCTTCTGTGTTATAGTTTTCTCCTTGTCTTTGGTTGCTTGA
ASCRP000212	0.323982	0.126	-1.64238	-5.08085	-0.398467	hsa_circRNA_001153	GGTTTTATAAGCTCATCCTCAACCATGACTTCCTTCCAATTTTGTC
ASCRP004040	0.324474	0.126	1.64095	-5.08285	1.17715	hsa_circRNA_103749	ATGGAAAGCAGGTGAGAGTTACGTGTGTGCATCCAATGAACCATTT
ASCRP001157	0.324474	0.126	-1.63958	-5.08477	-0.242869	hsa_circRNA_100783	AGCCTTGGAGTATGATCAGGTATGGCCTCACAAGTCTTGGTCTACC
ASCRP005048	0.324474	0.126	-1.63879	-5.08589	-0.350296	hsa_circRNA_104799	GAGGAAAACCAGCTCTTCAGTATCCCCATCAGCCAGTTTCCGAGGT
ASCRP002686	0.324474	0.126	1.63861	-5.08613	0.652869	hsa_circRNA_102367	TGATATTCCACTCTTTTGAAAACAATCCTCGAACAGGAAATCTTGG
ASCRP000562	0.324474	0.126	1.63854	-5.08623	0.591562	hsa_circRNA_100173	AATATCGATGGGAGGTGGTTGACTCAATGGTTCAGCATTTTAAAGT
ASCRP004104	0.324474	0.126	1.63845	-5.08637	0.47257	hsa_circRNA_103814	TAAATTACATCAGATGACAGCTGGTGTTGATGGTCATTCCTGGGCT
ASCRP003206	0.32643	0.127	-1.63395	-5.09268	-0.259956	hsa_circRNA_102898	CTCCACACAAATATTGTCAGCATGTGCTTTGTGAAACTGTTCGAAC
ASCRP002307	0.32643	0.127	-1.63346	-5.09337	-0.19698	hsa_circRNA_101967	GCTCTCCCAGAGAATCCAGGAGTCCTGCCAAAGTGGCACCAAGTGG
ASCRP004967	0.32643	0.127	-1.63333	-5.09355	-0.403168	hsa_circRNA_104716	GGGACAGCCTCCACCCAGGTCGATCCGTGCAACCTCCAGGAGCTGT
ASCRP005164	0.326544	0.128	-1.63179	-5.0957	-0.85119	hsa_circRNA_104917	CACTCCCTAGCAACTGAACCACCCAAATATCATCAAGTATTTGGAC
ASCRP001251	0.326544	0.128	1.63172	-5.09581	0.171861	hsa_circRNA_100878	TACCATAGGGATGGTGACCCTCTTTCAGATGTGGGTTGTTCCCCTC
ASCRP002567	0.326544	0.128	1.63162	-5.09595	0.476995	hsa_circRNA_102239	ACTACAGGACTGCGGACAAGGGCTGGCAGGTGCACATTCAGGTTCC
ASCRP001996	0.327076	0.128	1.63014	-5.09802	0.204525	hsa_circRNA_101647	CATCTGCAAGCGCGACTGTCAAAACTACATCAAGATCCTCCTGCCG
ASCRP003932	0.328654	0.129	-1.62554	-5.10444	-0.360464	hsa_circRNA_103637	TGAACCAGAAAACATTTTCAGCTGAACTCTCATCTCTCAACACTGG
ASCRP003026	0.328654	0.129	-1.62551	-5.10449	-0.182375	hsa_circRNA_102714	ATGTCCATAAGGAGATATTGATGACCATGAGATCCCTGCTCAGAAC
ASCRP004900	0.328654	0.129	-1.62512	-5.10503	-0.193344	hsa_circRNA_104647	GCTCTACAAGGTCCCTGACAGGCTGGATGAAATGAGATCCCCATGT
ASCRP001616	0.328654	0.129	1.6248	-5.10549	0.367766	hsa_circRNA_101253	CAAAGCTGAGGGATATGTGGTGCCTGTCATAAGCTCCAGAGAGCTG
ASCRP002872	0.328654	0.129	-1.62474	-5.10556	-0.385186	hsa_circRNA_102559	TGATGTTGAGGAAACCCCTCCTGGAGTTTCCCCAAAGCCATGGACA
ASCRP000140	0.328907	0.129	1.62378	-5.10691	1.30349	hsa_circRNA_000864	CAGCAGTGTGGACTGTTGGCTGGTAAAGTGTGTGCAATGTGAGGAA
ASCRP001869	0.329905	0.13	1.62145	-5.11015	0.157548	hsa_circRNA_101518	GAAACTCCAGATGTCCCTGGTAGATTTGGGAAAGAAGCTTTTAGAA
ASCRP002432	0.330248	0.13	-1.61918	-5.11332	-0.216789	hsa_circRNA_102097	CCTGGCACGGAATGCAGTTTTTACATAAGTTAATTCTCAGAGAAAA
ASCRP002986	0.330248	0.131	-1.61906	-5.11349	-0.256575	hsa_circRNA_102673	TTTTGCCAAGTGTGGCAAAGCGCTCCCTGGCCTTTCAAAGCAAGAG
ASCRP003202	0.330248	0.131	-1.61902	-5.11354	-0.328971	hsa_circRNA_102894	GGCAATGAGACAGCTCCATAATGGGAGAAGTAAAGAACAAAGACTT
ASCRP001565	0.330248	0.131	1.61832	-5.11452	0.172336	hsa_circRNA_101202	TGCAGGTTCAGTTGACTTCTGGCATTCCGATCAGTGCAACATGATC
ASCRP002106	0.330248	0.131	1.61781	-5.11522	0.201575	hsa_circRNA_101760	ACCTGGAGAAGCTCCCAGAATTCAACAGGCTTCTTGCACCTGGGTG
ASCRP004309	0.330248	0.131	1.61755	-5.1156	0.213816	hsa_circRNA_104034	CAGCCTTCAGCAAGTCAAGCCAGAGATCTGTTATCAAAAATGTTAG
ASCRP002757	0.330248	0.131	-1.61735	-5.11587	-0.342175	hsa_circRNA_102438	CCTGCTTCAGCTGAACCTTCACCTAGCCCCAGGATTACAAGGAAAA
ASCRP000796	0.331508	0.131	1.61455	-5.11976	0.234946	hsa_circRNA_100413	GGCTGCTTAAACTGCTGCTGTATTTAAACTTGAAACAGATAGAAGT
ASCRP002942	0.332865	0.132	1.61159	-5.12388	0.709116	hsa_circRNA_102629	GTCAAAATGAGCAGACTTTTACTTGTTGGTGGATGTGAAACTGCTG
ASCRP001211	0.332911	0.132	1.61092	-5.12481	0.303986	hsa_circRNA_100837	CATCAAACAGAATGGAATCCAGACAAATAAGCCAGCTTTGCGTGCT
ASCRP001076	0.332911	0.132	1.61052	-5.12537	0.145396	hsa_circRNA_100702	AACATGTTGTCCTCAGTACACAATAAGGCATGTGGGCACATTCCAT
ASCRP002438	0.335987	0.134	1.60409	-5.13429	0.149571	hsa_circRNA_102105	GCTGCCACAGGAATGGTGGACTCATCTTTGGTTAAATGAAGGTTTT
ASCRP001555	0.335987	0.134	-1.60365	-5.1349	-0.44247	hsa_circRNA_101192	CAGAGTATTGATTTAATCCAGAGACTGACTTCACTATAGAACCCAC
ASCRP002374	0.335987	0.134	-1.60347	-5.13514	-0.302055	hsa_circRNA_102039	GGAAAACTACAGCCACCACACACAAGTTATTCTACCTATGGAAATC
ASCRP000487	0.336657	0.134	-1.60177	-5.1375	-0.458249	hsa_circRNA_100097	ATTAGAAACCGCACAGTAGAGTACAGAGAGATGGATGAAAGCTTGG
ASCRP004796	0.336766	0.134	-1.60083	-5.1388	-0.296394	hsa_circRNA_104542	TACCCAAAGTCAGGAGGATGGCAGACTGTCAGTATCATACATAACA
ASCRP002750	0.336766	0.135	-1.60059	-5.13913	-0.257865	hsa_circRNA_102431	TATTGCCTCAAAGACCCCTCTGTGCCCCTGGATCCAATCTCAGTGT
ASCRP002716	0.336888	0.135	1.59951	-5.14063	0.275946	hsa_circRNA_102397	TGGTCATCTTCGCTTCCTGCGGAATGTGGTGTCGGGCGAGCACTAC
ASCRP000591	0.336888	0.135	1.59938	-5.1408	0.374567	hsa_circRNA_100202	TGGAGGAAGGGTGCCCAAATTGCTGTCTGCTCTCTGTCCAGAAGAA
ASCRP001071	0.337034	0.135	1.59822	-5.14241	0.589775	hsa_circRNA_100697	GCGTCTACTCTGCACTACGGCATGTGGGCACATTCCATGACAGTAC
ASCRP004088	0.337034	0.135	1.59813	-5.14253	0.195231	hsa_circRNA_103798	TGTGAAAGAGGTCAGCCAAGATGGGAAGTCGCTCCTTGACAAGCTC
ASCRP004355	0.33739	0.135	1.5968	-5.14437	0.307842	hsa_circRNA_104081	GTGGCTAATGGTGTGAATCATGGCAATACAGTGAAAGACAGTGATT
ASCRP002486	0.33739	0.135	1.59651	-5.14477	0.168547	hsa_circRNA_102154	CCAATCCCTTACCGGGACCACTTAATAGTGAGTCTTCCAACCAGAG
ASCRP003899	0.337945	0.136	1.59459	-5.14742	0.219786	hsa_circRNA_103604	CCATGGTCTCAGCTTTCTAAAACCAATTTTTCCAACAACAACGATT
ASCRP004014	0.337945	0.136	1.59353	-5.14888	1.06367	hsa_circRNA_103723	TTCACAGCAGGTTTTGCGTGTGAAGCTGTGTGGAAATGTGAAATAC
ASCRP005129	0.337945	0.136	1.59247	-5.15034	0.553082	hsa_circRNA_104882	TATGGCCTAAAACAGGAGGCTGGCAGGATGTACAGTTTTTATCACA
ASCRP003033	0.337945	0.136	1.59247	-5.15034	0.30572	hsa_circRNA_102721	TAAAACTTCAGATGAGACCCTTTTTGCTCTTCCTGCTGCATCTGAG
ASCRP005324	0.337945	0.136	-1.59204	-5.15093	-0.250051	hsa_circRNA_400028	GCAGCTCCATTGGGTGAGAAACAGCCTGACCATCTCAGTGGATCAG
ASCRP003114	0.337945	0.136	-1.59192	-5.1511	-0.428117	hsa_circRNA_102805	TCATTTTAAGGGGTCACTCCCATTGATGGAGCTCCCCACCGATCAT
ASCRP004381	0.337945	0.137	1.591	-5.15237	0.308008	hsa_circRNA_104108	TTCTTCTGCCAGAATGCTGATCCTAAGTCATCCCTCAAAGGTGTAA
ASCRP003900	0.337945	0.137	-1.59093	-5.15246	-0.395802	hsa_circRNA_103605	CTACCTCAGGCTATCGGCAGGACCCTCATCCCCCGTTACTTTAGCA
ASCRP003725	0.337945	0.137	-1.59092	-5.15248	-0.239715	hsa_circRNA_103427	TACACAGACATGGCCAAGGAGGTCACAGTAATGAAAGGCAGTAATA
ASCRP000929	0.337945	0.137	-1.59061	-5.1529	-0.271551	hsa_circRNA_100549	ATTCTACACCAACCCCATCATGTACAAAATCATCAGTTGATCATGG
ASCRP003856	0.338315	0.137	1.58946	-5.15449	0.532609	hsa_circRNA_103558	CAAGGAGTGGGTGCTTACTGCTCTGTTGTCAGGTGGCCTGGCTTTA
ASCRP004022	0.338466	0.137	-1.5887	-5.15553	-0.24904	hsa_circRNA_103731	GAGCCACACAGGAGATCCTAAGAAAAAGCTTATATGTTCAGTGTGC
ASCRP002405	0.340077	0.138	-1.58533	-5.16017	-0.339369	hsa_circRNA_102070	TAATGAAGATGTGGACCAAAGCACACAATCTCCTATGTCAGCAGAA
ASCRP004988	0.340087	0.138	-1.58482	-5.16086	-0.324479	hsa_circRNA_104738	ACTAACCTCTTATTCAGAATGTCCCAACAGGCACACCTTGGGCCCA
ASCRP001983	0.340157	0.138	-1.58373	-5.16237	-0.290462	hsa_circRNA_101634	AAATTTGGAATGAAGGTTGACGAAGTGAGTCCCACACCTCCTATCA
ASCRP001512	0.340157	0.138	-1.5836	-5.16255	-0.155808	hsa_circRNA_101146	TATAGAGCAGGCAAGTTAGGAAATCAACATTGAATCCCAATGCAAA
ASCRP005107	0.340157	0.138	1.58324	-5.16304	0.19063	hsa_circRNA_104860	ATATTATTGGCCAGTCTGTGGAAGAAGCTATCAGTTGGCTTCCTGA
ASCRP003858	0.34079	0.139	-1.58062	-5.16663	-0.344419	hsa_circRNA_103560	CTTTGAAACAAGAAGAAGTTCGTGCCCCAATTCCTCAAAAGCAGGA
ASCRP003509	0.34079	0.139	1.58002	-5.16746	0.971949	hsa_circRNA_103211	AGACCTCGCCATTGAGTATGAGGTGGTGTGGACCCTGCAAGATCCT
ASCRP004595	0.34079	0.139	-1.57974	-5.16785	-0.353103	hsa_circRNA_104332	AAAGAACCTCACTTCCAGCAATGCAGCAAGTCTTGGAAAACCTTAC
ASCRP005125	0.34079	0.139	1.57954	-5.16812	0.225268	hsa_circRNA_104878	CTATGGCTGCTGCTTTTGCGGGGATCTGATGAGCTTCTTTCTTCTG
ASCRP003607	0.34079	0.139	-1.57949	-5.16819	-0.621519	hsa_circRNA_103309	GCAACCAACACCCCCAGTGAGCCTTTGCTGTGCAAATTCGCTGATG
ASCRP005377	0.34079	0.139	1.5792	-5.16859	0.47323	hsa_circRNA_400083	TAATCCATCTTCTTGAACGAGTATGCTGGCTTTTGTGTGGAGCTCA
ASCRP004682	0.341563	0.14	1.57645	-5.17236	0.883897	hsa_circRNA_104426	ACTTTTAAGTGGAGTGGTGGATCAGACCAAAGATGGGTGGCTTTAA
ASCRP004805	0.341563	0.14	1.57637	-5.17246	0.735156	hsa_circRNA_104551	GTGTGCATTGGTTTTGGAAGGAAGGATGTTGTAGAACACTTACTAC
ASCRP000431	0.341563	0.14	1.57572	-5.17336	0.61124	hsa_circRNA_100041	GCCTGTAGGGCATTTTTGAAACGTTGGGGTTGTTGGAGTGGTTGGA
ASCRP000181	0.341563	0.14	1.57533	-5.17389	0.268016	hsa_circRNA_001039	TTCTGAGTTGGCCTTGATTGGAAGGCCAGGTGTCTGTCCAAGGCTG
ASCRP002971	0.341563	0.14	1.57468	-5.17479	0.192128	hsa_circRNA_102658	TATACAGCTAAAGCCATGGAAAGCCATGCAGGATATACGTACTGTG
ASCRP001988	0.341563	0.14	-1.57451	-5.17501	-0.203036	hsa_circRNA_101639	ATGTTCACCTATGATGATATCACCATGGTCATCTGCCCTGGAATTG
ASCRP000333	0.341563	0.141	1.57396	-5.17576	0.853348	hsa_circRNA_001800	GCTAACTCAGGGTGGGTTATGTGGAGCTGTTCATACTGCAGATATG
ASCRP003397	0.341563	0.141	1.57364	-5.17621	0.3131	hsa_circRNA_103093	GGTGGAAACGGTATCTGCCTCGTGTTGTATGAGAAGAGATTTGGGC
ASCRP005149	0.341563	0.141	1.57336	-5.17659	0.851267	hsa_circRNA_104902	GGTGTATGAGGGAAAAGACTACTTTGTGTGTATCCATTCTGGAGAG
ASCRP002215	0.341563	0.141	-1.5727	-5.17748	-0.470356	hsa_circRNA_101873	CGCGGGCGTCATCTCCAGTCTATGTGCTGAAGAAGCAGCAGCCCAA
ASCRP004569	0.341563	0.141	1.57225	-5.1781	0.149234	hsa_circRNA_104305	CCATGACAAGTTGGATCATCATCGCTGCCACAGTGGTTTCCATTAT
ASCRP003742	0.341563	0.141	1.57203	-5.17841	1.12457	hsa_circRNA_103444	ACCACTCAAGATGTATGGTCTGCTGGCTGTGTGTTGGCTGAGCTGT
ASCRP001651	0.34218	0.141	1.57045	-5.18057	0.255445	hsa_circRNA_101291	ATACTTCTTTGCTATTTCCACCTATGTGCAGAGGCCATTGAACACC
ASCRP004844	0.343033	0.142	-1.56845	-5.1833	-0.310788	hsa_circRNA_104591	AGGCCCGGAGGATATTATACCATTTATTGATAAATACTGGGAGTGC
ASCRP002805	0.343736	0.142	1.56672	-5.18566	0.184023	hsa_circRNA_102488	AACATCCAGAAAGACGCAAACATGCAGATCTTTGTGAAGACCCTCA
ASCRP003702	0.344658	0.143	1.56394	-5.18945	0.186021	hsa_circRNA_103404	TGTGGTCAAGGAGTCAGCCAGCCTGAAAGAGCAGGATGGATCTTGA
ASCRP003209	0.344658	0.143	-1.56362	-5.18988	-0.232118	hsa_circRNA_102901	AAATGTGCAGAACACAAGCAGACATTCCCAAACATTCTAAAGAAGG
ASCRP001020	0.344658	0.143	1.56355	-5.18997	0.285027	hsa_circRNA_100646	ATTTTCCTCCTAAAGGTCGATCTTCTCTCTTTCCCTTTGAAGATGC
ASCRP000581	0.344658	0.143	-1.56307	-5.19063	-0.364026	hsa_circRNA_100192	TATGCTTCAGCCTTGATGACGGCCATCTTCCCCCGCTCACCGAGGA
ASCRP000709	0.344658	0.143	-1.56269	-5.19115	-0.319192	hsa_circRNA_100323	CAGAAAGAAGGTAGAGTGGAACCCCCAGCTATTAGAGGTCCCACCC
ASCRP003914	0.344758	0.143	-1.56203	-5.19204	-0.724876	hsa_circRNA_103619	AGAGTAGCAGCGAATGCTGATGTCTTAAAGGCGATGGTAGCAGATA
ASCRP003309	0.345301	0.144	1.5601	-5.19467	0.569961	hsa_circRNA_103003	TTGTCATTTATCTTGGTGAGTTGGGCAGATGTACAGAGTCAGCTCA
ASCRP001691	0.345301	0.144	-1.5601	-5.19468	-0.482992	hsa_circRNA_101332	TTCAAGCCAGCTCCCATTGCTATCACATGTTTTACCAGAGGCTTGG
ASCRP005285	0.345301	0.144	1.55964	-5.1953	0.508461	hsa_circRNA_105038	TCATCAACATCAAGTTTGCCGACCAGCACGTGCCTGGCTATGGTGG
ASCRP004965	0.346755	0.145	1.55659	-5.19944	0.150514	hsa_circRNA_104714	CTGTGGTGCTGGCATCTTGACCCAGCCGAAAAAGTTGAAGATGCTC
ASCRP004954	0.346868	0.145	1.55591	-5.20036	0.16086	hsa_circRNA_104702	TCTGTGTCAGCCCACACATCTTGCTGACTTCACTCAAGTGCAAACC
ASCRP004490	0.347286	0.145	1.55442	-5.20239	0.155	hsa_circRNA_104217	ACAAATGAAGGTTGGATTATCTCAAGATGCCCAGGATCAAATGAGA
ASCRP004911	0.347286	0.145	1.55422	-5.20266	0.492888	hsa_circRNA_104658	TCCAATGAGGTTAATAGAAGATGAAATTGCAACCATTCTTAAATCT
ASCRP003295	0.348837	0.146	1.55061	-5.20755	0.159716	hsa_circRNA_102988	CAAAAGAGATTGATTCCACCAGTACTGTTGCTGCTCTTCTCATAGA
ASCRP005105	0.348837	0.146	1.55054	-5.20765	0.590354	hsa_circRNA_104858	TGGCCTGCTCAGCCTCAGCGATCTGGACGTTGGTGGTTGGCTATGT
ASCRP003548	0.34927	0.146	-1.54931	-5.20932	-0.392216	hsa_circRNA_103250	AGCCTCCTGATGATGAGAGAAACAGCACCCAGGACTATCTTCCAAA
ASCRP002068	0.35089	0.147	-1.54599	-5.2138	-0.388221	hsa_circRNA_101721	TTCACCTGGGTCTGCACGCCCTTTCTGAATCCCTGCCCAGAGTCCA
ASCRP004415	0.351371	0.148	1.54423	-5.21619	0.18248	hsa_circRNA_104142	ACCCAGCATTGGTGAAGTATTACAGACACTTAGCACCTGATCACTT
ASCRP000322	0.351371	0.148	1.5442	-5.21622	0.388195	hsa_circRNA_001724	AGGGCTGCTGGATGTGTCCTGAGCTGAAGCTTATCAACAAGTAATG
ASCRP001011	0.351862	0.148	-1.54248	-5.21855	-0.713744	hsa_circRNA_100637	CACTATCATCACCATGGAAAAAGTGACTTGAGCAGGATATTTTGAA
ASCRP002055	0.351862	0.148	1.5424	-5.21866	0.18192	hsa_circRNA_101708	GTTCTTGCAGGACCTTGCCTCATAGTATTCGATCAGATTCAGAAGA
ASCRP001534	0.352169	0.148	-1.54139	-5.22002	-0.222239	hsa_circRNA_101171	CAGGTGGCCAGATTGGAGGCTGTTGTCATTGGAGAAGTTCATGAGA
ASCRP000008	0.352208	0.148	1.54052	-5.22119	0.709368	hsa_circRNA_000082	AAATGAGTAGTATGTTGGTGAGAGTGAACGTGCTGTGCGACAAGTT
ASCRP000269	0.352208	0.149	1.54031	-5.22148	0.482859	hsa_circRNA_001409	GGCTGGGCAGGGTTTTGTCCACCTTGTGTCTGTAGCATCTAGGATG
ASCRP002288	0.352208	0.149	1.5399	-5.22203	0.198849	hsa_circRNA_101947	ATGCTGTTTTCTTGGGGGACAAAGTGCCTGCTGACCTCCGCCTCAT
ASCRP005016	0.352476	0.149	-1.53867	-5.22369	-0.556672	hsa_circRNA_104766	TGCTCAGAATGGTGCAGATGAGGGAACTGGATTTGGACGTGGCAGA
ASCRP000760	0.352476	0.149	-1.53788	-5.22476	-0.136111	hsa_circRNA_100375	TTTGTCTCCCATTCCCGTCTTCCGTGTGTGCTAAGATCGTGCAGCT
ASCRP001279	0.352476	0.149	1.53737	-5.22544	0.325167	hsa_circRNA_100906	TGGCAAAGAGTGTCTTCATTGGCTGCTCTGGCATGGAGCTGATATC
ASCRP004341	0.352476	0.149	-1.53735	-5.22547	-0.225315	hsa_circRNA_104067	GAGCAAAACAAATGACGTGGCCGCACTTCTGAAACCCATATCGGAA
ASCRP001219	0.352476	0.149	1.53706	-5.22585	0.321861	hsa_circRNA_100845	AACTGAACTCCTCCAGCCTCCAGAAACCCACCTTGGGACACCTTGA
ASCRP000480	0.352792	0.15	-1.53571	-5.22768	-0.358303	hsa_circRNA_100090	ATCAAGCACCTCCTCGGATCCCCCTCTGTGTGCCTGAGCGAAGCTT
ASCRP000395	0.352792	0.15	-1.53557	-5.22786	-0.188966	hsa_circRNA_100005	GGACTTCACGGTGGCTATTATCATGGAAAACTAATTTTTCCCAGAG
ASCRP002316	0.354519	0.151	-1.5321	-5.23254	-0.474692	hsa_circRNA_101976	CCTCCCTGAGGCTCCATCTGGCCTGAGCACCCTGCCCCAGCGAGTC
ASCRP002852	0.354565	0.151	-1.53155	-5.23327	-0.626445	hsa_circRNA_102539	GCCATGTTCCAGCGACACCACAGGCAAGCTGGGCTTTGAGGAATTC
ASCRP001387	0.354601	0.151	1.53054	-5.23462	0.322988	hsa_circRNA_101017	TACTCTCAAGAGGAAATCACTCAAGGTCCAGAATGGCTACAACAGT
ASCRP000645	0.354601	0.151	-1.53054	-5.23463	-0.298248	hsa_circRNA_100257	ATCGAACTGCCAAGTTTCACAGCCGGGTGCCTCATCTCCAGACATG
ASCRP004243	0.35578	0.152	1.52803	-5.238	0.171985	hsa_circRNA_103963	AGATCTTGTGGTTAAAAACGACAACCAACATCAGCCATGAAAGATC
ASCRP001044	0.356564	0.152	1.5262	-5.24045	0.157406	hsa_circRNA_100670	TCAGAGGAGCAGTCCTGAGGCTTTCTACCAATGCAGGCCAGTGGAA
ASCRP002723	0.356564	0.152	-1.52544	-5.24146	-0.262811	hsa_circRNA_102404	TTCCATGGGGGCCCCACCTCTTCCAGAACCTCCTGCTCTTCCTGTG
ASCRP001392	0.356564	0.152	1.52526	-5.24171	0.144205	hsa_circRNA_101022	GTTTGCATTGCTCTTCACAGATGGAATCACAAATAAACTTATTGGC
ASCRP005136	0.357805	0.153	-1.52265	-5.2452	-0.208257	hsa_circRNA_104889	TCTCCACACAGGGCTGTATGACAAATGTTCTTATATCTCACGTGAC
ASCRP005304	0.35827	0.153	-1.52104	-5.24736	-0.164329	hsa_circRNA_400008	TTCCTCTCCCAGTACCAAAGAGGGAATGCTCCCTCAGGCCCCCAAA
ASCRP003273	0.35827	0.153	-1.52073	-5.24777	-0.199397	hsa_circRNA_102966	GACCACAGAGTTGTTAGAGTTGGAAGCTTGGCAGTTGGCCTCCCTT
ASCRP001772	0.35827	0.153	-1.52044	-5.24816	-0.196594	hsa_circRNA_101413	CCCAGTGCAGGTGATGACGAACAGAGTGATTGGTTCTATGAAGGAG
ASCRP003136	0.359071	0.154	-1.5186	-5.25062	-0.226162	hsa_circRNA_102827	AATATTGTCCAGCTCTTCAGTAGGTTACCTGCAACATCCAGGATCA
ASCRP001763	0.359452	0.154	1.51712	-5.25259	0.2764	hsa_circRNA_101404	ATACCATTCTCATCGTTGGATGACTCACTGGTTGTGTGGAAGGAAG
ASCRP002209	0.359452	0.154	1.517	-5.25275	0.140645	hsa_circRNA_101866	TGTTTTCCAAGCTGCAGTACCAAAGGTGCTCCAGCTGCTGCTCCTG
ASCRP003741	0.361045	0.155	1.51381	-5.25702	0.290238	hsa_circRNA_103443	ACCACTCAAGGTCCTGGGAACTCCAACAAGGGAGCAAATCAGAGAA
ASCRP004813	0.361531	0.155	1.51251	-5.25875	0.144473	hsa_circRNA_104560	ATAGCAATGCACAGCCAATTTCATGCTCCACTATAGATTGCTTCCT
ASCRP002858	0.361853	0.156	1.51149	-5.2601	0.169379	hsa_circRNA_102545	ATCTTGACAGAGCTGGGCTTGCACTTCCGGGCTTCACCCCCATGAC
ASCRP005361	0.362309	0.156	1.51024	-5.26176	0.444719	hsa_circRNA_400067	GTCTCATAACCAATTGCTTGCTGGATGTGTACTGGTGTTTCCCATT
ASCRP004941	0.362847	0.156	1.50886	-5.26361	0.32769	hsa_circRNA_104689	ACATGCCACATTTCTTTCAAGATGGCTTGAAAACAGCTGATAAGTT
ASCRP002787	0.364526	0.157	1.50541	-5.26819	0.719923	hsa_circRNA_102470	GGCTGTGAGGGGTTTCTATGTTGCACTGAGACTGGTGGCCTGTGCA
ASCRP002965	0.364526	0.157	1.50507	-5.26865	0.242433	hsa_circRNA_102652	AGAGTATATTGCTGCTTTTCTCAGTCACTTTGGCACTGCACTTGGA
ASCRP001282	0.365212	0.158	-1.50344	-5.27081	-0.305643	hsa_circRNA_100909	CCCTGTATCAGGAGCACAGGATTCACTCCTTCTCCAGTTGCACAGC
ASCRP001451	0.365878	0.158	1.50184	-5.27293	0.205614	hsa_circRNA_101083	TTGGCTTTGCAAGATATGGCAAGATTGTTTCCACTAAGGCCATACT
ASCRP003782	0.366926	0.159	-1.4996	-5.27589	-0.245729	hsa_circRNA_103484	CTTGCTGTTGATATTTCACAGTTCTTGCCGAGTGCTTCACTTTTTC
ASCRP004643	0.368105	0.16	1.49634	-5.2802	0.171081	hsa_circRNA_104382	TCTACGCTGCAGCCGAGTTCCTGTTCTGGGCTTCGCTGTGCATGAC
ASCRP004897	0.368105	0.16	-1.49628	-5.28029	-0.197983	hsa_circRNA_104644	ATCTACACTGCCATCATGTATGTCATGGGAGCACTTGGCCCTGCAG
ASCRP000302	0.368105	0.16	1.49621	-5.28038	0.990258	hsa_circRNA_001587	TTTGCAATGGTGGGGTGGTGAGGGATGCGGGCTGCAGGCAAGTATG
ASCRP005338	0.368383	0.16	1.49528	-5.28161	0.365445	hsa_circRNA_400042	AGCTCACAGGGGGGGTCCCCTGAGAGGTGGGTGTTGAACAGCTCCC
ASCRP000048	0.368667	0.16	1.4939	-5.28344	0.174987	hsa_circRNA_000442	TGTATGGGCTGGAAAAGAGGTCCCGTGACTTCTCAGAGAGGACGCT
ASCRP003939	0.368667	0.16	-1.49387	-5.28347	-0.203525	hsa_circRNA_103645	CTGATTCCACCACCGGGAGATTACCTGGGGCAATTGATGTTATCGG
ASCRP000922	0.369233	0.161	-1.49245	-5.28535	-0.744796	hsa_circRNA_100542	TTACATCTCTCCTGCGTCGGTGACTAAGCAATCAAAGAGAAGTACA
ASCRP002960	0.36949	0.161	-1.49082	-5.2875	-0.132407	hsa_circRNA_102647	ATGACCACAGATATAAAGACCTGATGCCACATGATTTGGCTAGAGC
ASCRP004547	0.36949	0.161	-1.49065	-5.28773	-0.266929	hsa_circRNA_104282	ACCTGGATGACAACGAGAGGAGGAAGGAAGCAGCCACCCTCGCCAT
ASCRP005206	0.36949	0.161	1.49063	-5.28776	0.192759	hsa_circRNA_104959	CTGAAAGACGAGTGCCCACATGGCAATGGTGGATGCCCTGATGATG
ASCRP004169	0.370029	0.162	1.48804	-5.29116	0.543875	hsa_circRNA_103889	TGGTGTAGAGATGTTGATGATGGAGACACAGTGACAGATTTCATGG
ASCRP005232	0.370029	0.162	1.48769	-5.29162	0.141456	hsa_circRNA_104985	TTTTGTGCAGGTTCCTGGTATAAATTTACCCGTCAATCAACTGACC
ASCRP001821	0.370029	0.162	-1.48765	-5.29168	-0.231461	hsa_circRNA_101470	ACCTGCTGGAAGAGTTCTCAGGCGCTGTGGTCTCACCTTCCACTGG
ASCRP000259	0.370029	0.162	-1.4875	-5.29188	-0.626872	hsa_circRNA_001379	TCTGGCCCTATCTGACCTCGCGCGGAGCCCCGTTCTCTGGGAACTC
ASCRP002030	0.370029	0.162	-1.4874	-5.292	-0.143625	hsa_circRNA_101683	AAGCACATGGATGGAGGTCTCGGTCCAGCTCGACTTCCAGCTCAGG
ASCRP004590	0.371396	0.163	1.48465	-5.29563	0.266426	hsa_circRNA_104327	CTTCAGTCACTGTGTCAAATTTGTTCAAGACATTACCAGAAACATC
ASCRP004484	0.372082	0.163	1.48285	-5.29799	0.487856	hsa_circRNA_104211	GTACAGACAATCACTCCACATGGGTTACATTTTGCCATCTGCCTTT
ASCRP004508	0.372082	0.163	1.48253	-5.29841	0.11809	hsa_circRNA_104236	AATCCATTAATTTGTATTCCCTGAATGACTATAAACCACCCATTTC
ASCRP000446	0.372082	0.163	1.48211	-5.29897	0.314766	hsa_circRNA_100056	CAAGAGTCCAGTAGTCCAGGTGAGAGATCAAGCCCAGCGCTGTTCA
ASCRP002131	0.372235	0.163	1.48139	-5.29991	0.138556	hsa_circRNA_101785	ACAGTGCTTGGGCTACTGACAGTTGATCCAGTCCCCTGTGACAACC
ASCRP001939	0.373415	0.164	1.47896	-5.3031	1.0905	hsa_circRNA_101589	TAGAGTATCAAGCAGAGTCAATGCATGTGTTGATGTGGTGCTCTCA
ASCRP003940	0.374289	0.165	-1.47704	-5.30562	-0.261317	hsa_circRNA_103646	TTTCCATATGGCAATGGAGATTACCTGGGGCAATTGATGTTATCGG
ASCRP002579	0.375732	0.165	1.47418	-5.30937	0.348015	hsa_circRNA_102251	TCGACTCGTGGATGAATGGATGATGAACTTGTTGTTGGACATAGTG
ASCRP002761	0.376185	0.166	1.47277	-5.31122	0.873991	hsa_circRNA_102442	TTTTGGGGAGGTCCCTGAGTGCCAGAGGTGGTGGTGTTGCTTATCT
ASCRP005050	0.376185	0.166	1.47222	-5.31193	0.267129	hsa_circRNA_104801	TGGGGGGAAACCAGTAATTCCCTCCTGGTCCCAGACAGTCTAAGAG
ASCRP000683	0.376185	0.166	1.47205	-5.31216	0.167505	hsa_circRNA_100296	AAGGAAAACAAGTGTCTGCTTATGTCGGGCAAGAATATCACGGCAT
ASCRP000741	0.37736	0.167	1.46964	-5.31531	0.440546	hsa_circRNA_100356	TTCTGTCCCAGAACTCCAGGCCAGTCTGCCATCCATCCAGGAAGAA
ASCRP000017	0.378454	0.167	1.46737	-5.31827	0.951911	hsa_circRNA_000166	CGAAGTGAGTTCAATGGCTGAGGTGAGGTGAGTTCCCAGAGAACGG
ASCRP003269	0.379571	0.168	1.46507	-5.32127	0.277415	hsa_circRNA_102962	GTTCAGAGAGGTGTGGACCACTACAACGAGGTGAAGAGCGTCACCA
ASCRP003981	0.38053	0.168	1.46303	-5.32392	0.26311	hsa_circRNA_103687	AATGTAGAAGTAAGCCTAGCTGATCCTGCTGCCCTTGGCTTCATCA
ASCRP002326	0.380759	0.168	1.46219	-5.32501	0.211531	hsa_circRNA_101989	GGATGAGATGGCAAAACCCATTTATGGCGGTTGGCTGCTCCTGGCT
ASCRP002428	0.380768	0.169	1.46172	-5.32563	0.160866	hsa_circRNA_102093	TTCCAAGAAGATTGAGTCTGTTTCTCAGCCATTGGAAAACCATGGT
ASCRP003941	0.380968	0.169	-1.46071	-5.32695	-0.326915	hsa_circRNA_103647	TGCATTTCCATATGGCAATGGTTTTCCTCCTCCACCAGGCGCTCCA
ASCRP000768	0.380968	0.169	1.46047	-5.32725	0.185345	hsa_circRNA_100383	ATGCTAACCCTCGGGGTCATTGCCATCGACCGTCGTCCAGCATGCT
ASCRP002875	0.381433	0.169	-1.45925	-5.32885	-0.244567	hsa_circRNA_102562	TTAACCCCCGCTCTCCATCCATGAGACCGAGGACCCCAACGACAAC
ASCRP002842	0.381695	0.17	1.45836	-5.33	0.296885	hsa_circRNA_102529	AACTTTTTACCAAGGGTGTGACCGAGTGTTATGAGTGTCATCCTAA
ASCRP004382	0.381834	0.17	1.45739	-5.33126	0.149034	hsa_circRNA_104109	AGCTGTGCAGGCTCAGAAAAAATGTCTGAATCAGACTTCCCCCATT
ASCRP002249	0.381834	0.17	-1.45721	-5.33149	-0.210366	hsa_circRNA_101907	GAGGACGAAGAGCTTACAATTGAGACTGCTAACCCCTACCTTTGAA
ASCRP001677	0.38248	0.17	-1.45527	-5.33401	-0.499927	hsa_circRNA_101318	TCCACTTGCCACTGGATCTGACAGGATGGCATCTGATGACTTTGAC
ASCRP003779	0.38248	0.17	1.45497	-5.3344	0.214701	hsa_circRNA_103481	TGTCAGATCTTCTCACACTGCTGTAAAGAAGTAACAGCTAGCAGTC
ASCRP005388	0.38248	0.171	-1.45478	-5.33465	-0.847116	hsa_circRNA_400095	GCTCTTCCCCGAAGGGAGGCCTCCTGATGCGGGACAGCTCAGGTGT
ASCRP000215	0.382488	0.171	1.45298	-5.33698	0.17321	hsa_circRNA_001170	CGCCAACGTAGGTAAAGAAAAGCCACAATAATCAAACAAACAAGCA
ASCRP005344	0.382488	0.171	-1.45274	-5.33729	-0.166497	hsa_circRNA_400048	TCTCACATCTCCCTGTGGCCTCTCCTTGGCATTAGAAAGCCAGGGA
ASCRP002969	0.382488	0.171	1.45269	-5.33735	0.130965	hsa_circRNA_102656	TTTCTTCTGATTTCTGCCATTGGGCCATGCAGGATATACGTACTGT
ASCRP002763	0.382488	0.171	-1.45249	-5.33762	-0.167465	hsa_circRNA_102444	GAAGGACCAGATGGAGTTTGACGAGAAGGACTTACGACGGGAGATC
ASCRP005068	0.382488	0.171	-1.45248	-5.33763	-0.239371	hsa_circRNA_104819	TCCACTAGCCTCACTAAAGGTTGCACAGAGCATTGAGGATCACCAT
ASCRP001252	0.384033	0.172	1.44911	-5.342	0.280939	hsa_circRNA_100879	TGTTCAGCAATCCCTTCCACGAGTTCTGCATCCGTGGCTGGTGCAT
ASCRP000012	0.384033	0.172	1.44904	-5.34208	0.519388	hsa_circRNA_000104	AAGAACCAAGAATGCAGAAGTCTGGGGGTGGTGGAGAGCCAGGCCA
ASCRP000458	0.384146	0.172	1.4484	-5.34291	0.18323	hsa_circRNA_100068	GACTGGGAAGGCCGTGCCTGGCTGTACCTGGCCCTCAACGAGAACT
ASCRP004835	0.384195	0.173	1.44729	-5.34434	0.194708	hsa_circRNA_104582	TGCTTTGAATGTCCGGACCCTATTTGTCAGTGGCCTTCCTCTGGAT
ASCRP000959	0.384195	0.173	1.44709	-5.3446	0.167377	hsa_circRNA_100580	AGAAGAGCATGGATCAAGACTTCTGGTGCCCAGGTTTTGTAATCAA
ASCRP004511	0.384195	0.173	-1.44695	-5.34478	-0.207522	hsa_circRNA_104239	TCAGCAGCAGGGCAGCCCAATGGATCCAATGGTGATGAAGAGACCT
ASCRP001380	0.384195	0.173	1.4465	-5.34537	0.322324	hsa_circRNA_101009	CTTGGATGAGGATACTGTAGTTGCTCTCCAAGCTCTTGCCAAATAT
ASCRP000311	0.384388	0.173	1.44573	-5.34636	1.03045	hsa_circRNA_001654	GGAAGGTCAGGCCTGCATGTATCTTAGTGTGTCTGCTGGTGTGAGT
ASCRP000700	0.384476	0.173	-1.44499	-5.34731	-0.359417	hsa_circRNA_100313	TATCAGGAGAGGAGGAAGTTCACAAATGGGTGCTACCATAGTAGAT
ASCRP002538	0.384476	0.173	1.44468	-5.34772	0.17587	hsa_circRNA_102210	ATCCTTACAAAGTGCAAACCTGAGTGACTCCTACTTCACCAACCGC
ASCRP003717	0.384981	0.174	1.4434	-5.34937	0.565604	hsa_circRNA_103419	CTATATTGGTAAAGGTGACTCTTTTGATGGTGGGACTTGATAATGC
ASCRP001413	0.385052	0.174	1.44283	-5.3501	0.43008	hsa_circRNA_101043	AACTGAAAGAGCTGCTATGCCTTTCTTGCCTCCTTCTATGACAATC
ASCRP005053	0.385452	0.174	-1.44172	-5.35153	-0.205623	hsa_circRNA_104804	GGAGTAGGAGACGTTGGAACTTGCCAGGAATCCAGCAATGATGCAG
ASCRP001368	0.386112	0.175	1.43939	-5.35454	0.668454	hsa_circRNA_100997	AGAAGAAGAGGTTGATCTCTATGTTTGTATGTTTTGTGGTCGGGGA
ASCRP002095	0.386112	0.175	1.439	-5.35504	0.176397	hsa_circRNA_101749	GTTGATTCATGTTTCCTTTGGCCGTGATTTTGAACAACAGCTGAGT
ASCRP000143	0.386112	0.175	-1.43835	-5.35587	-0.420806	hsa_circRNA_000872	ATGATCTTCACCTGGGCTGCCACCTCCCGCACCAGCTTGGCAAACT
ASCRP001818	0.386112	0.175	1.43816	-5.35611	0.14107	hsa_circRNA_101467	AAGCAATGGCAGGCTCCTGGATTTGGATTTGGAATTGCAATATCTG
ASCRP000990	0.386112	0.175	1.43734	-5.35717	0.302373	hsa_circRNA_100615	CCGGAAAGAGGTCTGGGGTCCTGAGGCTGCTGGCAGACTATGGGTA
ASCRP003709	0.386112	0.175	1.43713	-5.35744	0.244764	hsa_circRNA_103411	CTGATCCTAAGTTGTCTGTTTTGATGCCAAGATAAACTTTGATGAC
ASCRP005006	0.386112	0.175	1.43707	-5.35752	0.312071	hsa_circRNA_104756	GTCACACACACTCCAAAGACAACAGGCCCTCCCTCTGCCCTCCCGT
ASCRP000232	0.386112	0.175	-1.43703	-5.35757	-0.301572	hsa_circRNA_001233	AGGACTGTGACTTCCTGAATGCACTGCACTGCTCCCTGTCACATGC
ASCRP003643	0.386115	0.176	-1.43657	-5.35816	-0.449184	hsa_circRNA_103345	GGGCTTGAGAGCTGCCAAAGACCTTCCTTCAGAAGAAGAAAATGAG
ASCRP004380	0.386896	0.176	-1.43451	-5.36081	-0.197945	hsa_circRNA_104107	TCTTCTGCCAGAGACCCACAAGCATTGAACTATTTTCTACATGGAC
ASCRP003768	0.386896	0.176	-1.43436	-5.361	-0.260321	hsa_circRNA_103470	CCATTACAAGAGTGGTTCGCCTCCAGCACACAGAGCTACATCCTTC
ASCRP002208	0.386896	0.176	1.43395	-5.36153	0.246176	hsa_circRNA_101865	ATGAACCATATCAAGCATGTGGATTTAAGGTGGTGTCCCAGCGAAT
ASCRP003338	0.387869	0.177	1.43176	-5.36434	0.152752	hsa_circRNA_103032	TTTATTGCCATGATAATGAGCTTCAGTCCCCAAGATCTGCGAAGAC
ASCRP002888	0.387869	0.177	1.43146	-5.36472	0.483075	hsa_circRNA_102575	GGATGTCAAGAATGGAGGCAACCTGCTGTGTGCAGTGGATGAATCC
ASCRP000650	0.388022	0.177	1.43076	-5.36561	0.287413	hsa_circRNA_100262	TGCTGTCCAGGGCACTCCACAGAAGGATGTTATTATCAAGTCAGAT
ASCRP003838	0.388171	0.177	1.43007	-5.3665	0.252451	hsa_circRNA_103540	GATCATACAGGCAAATCCTGATCCTAACTGTTGTCTTGGAGTATTT
ASCRP003377	0.389246	0.178	-1.42788	-5.36931	-0.446438	hsa_circRNA_103073	ACCTGCGCAGAGCCCAGCAGTGATTGACTCCCCATTGAAGCTGGAG
ASCRP000745	0.389826	0.178	-1.42638	-5.37122	-0.152485	hsa_circRNA_100360	CACTGGACAGTCACCCCAAACCAGAAGGCCTGGCTGCTGCCAAGAA
ASCRP002453	0.389826	0.178	-1.42604	-5.37166	-0.405942	hsa_circRNA_102121	TCCTGATGGCAAAACTGGCCCCCCTGGCCCTGTTGGTGTTCAAGGA
ASCRP000549	0.389999	0.179	1.42531	-5.37259	0.728271	hsa_circRNA_100160	CAATGCTCAAGTGGTGGTATCATGGATACAGAAATGTCTGAAGATA
ASCRP002681	0.39048	0.179	1.42371	-5.37464	0.147532	hsa_circRNA_102362	TCCAGCCTGGCAGAATGGCAGCAAAGACAACTCTCTGGACATGCTG
ASCRP003827	0.39048	0.179	-1.42323	-5.37526	-0.28018	hsa_circRNA_103529	TTCAGCCCTCCAAGAGAGCCTCCTTTTCACCTGACCAGAAGAGGCT
ASCRP002223	0.39048	0.179	1.42285	-5.37574	0.47235	hsa_circRNA_101881	TCTGCTGTTGGCAACTGCGATGTCTGTGGACTGTCTTGGGCAGCAT
ASCRP002344	0.39048	0.179	1.42274	-5.37588	0.178067	hsa_circRNA_102008	GCAGTGTTTTAGCTGCTGGTCTCTTGCATGGCACCAAGAATGTTAC
ASCRP002238	0.390718	0.18	1.42191	-5.37694	0.198901	hsa_circRNA_101896	CAGAGTCCAACTATGTCAGCTCTATCCTGAAGAGAACTTGGAGAAA
ASCRP000245	0.3914	0.18	1.42036	-5.37892	0.293809	hsa_circRNA_001296	AATTCCAGAAAAACCATGGAAGACAGCATCTCACTCTGTCATCCAG
ASCRP000148	0.391533	0.18	-1.4197	-5.37977	-0.150447	hsa_circRNA_000903	ACTCTGGGAGGTCCTTGATATACCTTGGAGTGGGGACTTGATCCTG
ASCRP004917	0.392442	0.181	1.41727	-5.38285	0.19791	hsa_circRNA_104664	ACAAGTTACAATGCAACAGCATTCCAAAATATGCCCGGTGCTATCC
ASCRP000268	0.392442	0.181	1.41682	-5.38343	0.148101	hsa_circRNA_001408	GTTTTTGTAACAGCCTGTGCCTTTTACCACGGACTACTTTCACTAC
ASCRP001434	0.392442	0.181	1.4166	-5.3837	0.605559	hsa_circRNA_101066	TGGTAGTCATCCTCTCCATTGTGGGTGGTGGTGAATGCCTTGGTGG
ASCRP005218	0.392442	0.181	1.41644	-5.38391	0.302029	hsa_circRNA_104971	TGGTGGCCAAGATGGTGTTTTAACATCACGGGATGAGATCAAATGT
ASCRP004349	0.394105	0.182	-1.41314	-5.3881	-0.418615	hsa_circRNA_104075	CTCCTCTGAATTCTGCACCAGTTAGAAGACAAATGAAAGCTAAGCA
ASCRP000385	0.394105	0.182	1.41287	-5.38845	0.931656	hsa_circRNA_002144	AGTGAGTTCAATGGCTGAGGTGAGTTCCCAGAGAACGGGGCTCCGC
ASCRP003439	0.394253	0.182	-1.41219	-5.38932	-0.129308	hsa_circRNA_103136	CCCTGTGCAGGTCTAGCACATACCGCTCCAAGGGCTTTGACGTCAC
ASCRP003820	0.39484	0.183	1.41054	-5.39141	0.120406	hsa_circRNA_103522	GAAAATGGGCTAGGTACAAATTCTGAGCTGTCTAACCCCTCTGAAA
ASCRP003743	0.39484	0.183	-1.41035	-5.39165	-0.402292	hsa_circRNA_103445	TGGCACCATGGACCCATCCATTTTCACAGTATTGACTGCTAAGTCT
ASCRP001114	0.395628	0.183	1.40864	-5.39382	0.176967	hsa_circRNA_100740	ACAGTGACAGGGGATCATCGTCTTGCTCTTCTTTTATCTCAGTTTG
ASCRP001806	0.395631	0.184	-1.40819	-5.39439	-0.141602	hsa_circRNA_101450	CATGGCTGAGGGCTCCAAACGAATCCTGCGGTCCCATGAGATTGTG
ASCRP000078	0.395993	0.184	-1.40657	-5.39644	-0.394585	hsa_circRNA_000618	TGGTTGTGGTTTAGGAGGGGGGCATTCCAAAGGCAGGTGAATAAAT
ASCRP001100	0.395993	0.184	-1.4065	-5.39653	-0.185759	hsa_circRNA_100726	AGATTCTGAACTCATTACTGCAGAGAGATCCTGCTTCCCATGATGA
ASCRP002615	0.395993	0.184	1.40602	-5.39714	0.175636	hsa_circRNA_102296	GAAGTATACAATGTACCATTGGACTCTCAGATTACACCACCACCTT
ASCRP004410	0.395993	0.184	1.40583	-5.39738	0.185217	hsa_circRNA_104137	TGTCTACAAAATTGGTGATGCCTTGGTTCAAGGGATGGAAAGTCAC
ASCRP003416	0.396287	0.185	-1.40486	-5.39861	-0.315443	hsa_circRNA_103112	GCAGATACAACACCAGCAGACGTTTTTGAATCAACTGAGAGAAATT
ASCRP002358	0.396287	0.185	-1.40416	-5.3995	-0.124834	hsa_circRNA_102023	AACATCAAAAGAGCCAACACAGATCTATAGATTTCTTTGAACTCGG
ASCRP002408	0.396287	0.185	1.40369	-5.40009	0.270869	hsa_circRNA_102073	AAACTCTTGGACCCACTCCTTGCCAGTTGTGGTGATCTCCAACATC
ASCRP000678	0.396287	0.185	1.40359	-5.40022	0.33543	hsa_circRNA_100290	GACACTTTCATTCTCATGCTTAGGCTTGATTTCCGACTCTTTTCAC
ASCRP003414	0.396341	0.185	1.40306	-5.40089	0.440671	hsa_circRNA_103110	CTTGGAGACAGACGGAAGTGTTTGGATTGTGAGCTATTTCAGAACT
ASCRP005005	0.39671	0.185	1.40203	-5.40219	0.490151	hsa_circRNA_104755	TACAGTACAGGTCCCTCCAGCCTCAGCCAAGCAACATGGGGTGAAC
ASCRP002708	0.397005	0.186	-1.40069	-5.40388	-0.150971	hsa_circRNA_102389	TTAGGATACACACAGATGGAGTTTTAACATTGAATGCGGAGAACAC
ASCRP000823	0.397005	0.186	1.40059	-5.40401	0.179079	hsa_circRNA_100440	ATGATTGGCTGGCATCAGCAGCCTGTTCAGCTCTCTAAAAGTTGTC
ASCRP003224	0.397005	0.186	-1.40018	-5.40452	-0.155812	hsa_circRNA_102916	GAAAAAAGAAATGAAAACAATCACTGCTGTTCCCTCGTCACACCAA
ASCRP001859	0.397005	0.186	-1.39978	-5.40502	-0.136508	hsa_circRNA_101508	TTTAGACTTGCACCAGTAACTCCAGATAGTGGTTATTCATCAGCCC
ASCRP003903	0.397169	0.186	1.39908	-5.40591	0.505195	hsa_circRNA_103608	GGGACTCCTGTGGGTTGCCAGCGTTGATGTGGTGGAGAATGAAGAG
ASCRP002019	0.397527	0.187	-1.39785	-5.40746	-0.321796	hsa_circRNA_101672	TACTCCAGGGGCGCTCAGGGATCGACTACAAGACCACCACCATCCT
ASCRP003810	0.397527	0.187	-1.39762	-5.40775	-0.273715	hsa_circRNA_103512	ACACTTCAGTGCATTCAAGGAAGCCAGTTGAGGGAAGTTCTCCATG
ASCRP001384	0.397912	0.187	-1.39657	-5.40908	-0.233907	hsa_circRNA_101014	CAAGATTGAGGCAGGCAGTGGTTAAAGGTTCCCTTCCACATCCTTT
ASCRP003073	0.398027	0.187	-1.39594	-5.40987	-0.427303	hsa_circRNA_102762	AAACTAAAAGAATCAAGTGACGGATACTAATAGAAAACTACAACAT
ASCRP005011	0.398079	0.187	-1.39542	-5.41053	-0.473437	hsa_circRNA_104761	TCCTCAGAGCCTGAACTGGCATCAAATACTCACAACATAGCTCAGG
ASCRP002088	0.398865	0.188	1.39357	-5.41286	0.227503	hsa_circRNA_101742	GTAAGAAACTAGGAAACAAGTGGGAATGGAAGTGGCCCCACATCTC
ASCRP003324	0.398865	0.188	-1.3928	-5.41382	-0.336635	hsa_circRNA_103018	TTCACGCTCAAGTGGGACTTCCCCTCTCGCATGCCTCAATGCTATG
ASCRP001617	0.398865	0.188	-1.3925	-5.4142	-0.264496	hsa_circRNA_101254	AGAGTATTAGGAAGAAAAACTAAACCACCACGACCAGATTCCCCAG
ASCRP000742	0.398865	0.188	-1.39201	-5.41482	-0.335885	hsa_circRNA_100357	CTGAGGACAATTCCAAGATGAGATGGGATTCTCCAACATGGAAGAT
ASCRP000093	0.398865	0.188	1.39196	-5.41487	0.19614	hsa_circRNA_000662	GTCTCTTTAGGTCTTGGATATGAAGAGCATGTTGTCTCTTCCTCTT
ASCRP000279	0.400153	0.189	-1.3894	-5.4181	-0.228449	hsa_circRNA_001465	ATGGCATTGCGAGACAGTGTCAGGTCCTCCAGGCTCTCTAGGAAGT
ASCRP000781	0.400153	0.189	1.38903	-5.41856	0.359414	hsa_circRNA_100397	GGCTGTGCAGTGAAGCTGTGGTCTACCAATCTAGACAACTCAGTGG
ASCRP002962	0.400219	0.189	1.38808	-5.41975	0.232549	hsa_circRNA_102649	TATGACATTAGCCAGGTGTACAGTGCTGTGGATACCAATCCACTTT
ASCRP004605	0.400219	0.189	1.38805	-5.41979	0.830344	hsa_circRNA_104342	GGTGGTGTAAAAGTGTGAAAGAAAATGTCTTTATTTAAAGCCCGTG
ASCRP003053	0.400993	0.19	1.38638	-5.42188	0.880481	hsa_circRNA_102741	AAGACTAGAGCTCCTTTTTGGTTCAGGTGTGCTGGTGTCTCTAAGC
ASCRP002772	0.401456	0.191	1.38463	-5.42407	0.125244	hsa_circRNA_102454	GGCCAGCATGATTCATCAATAAGCTGCAGCCAGGCTCCGTGAAGAA
ASCRP000548	0.401456	0.191	1.38449	-5.42425	0.280782	hsa_circRNA_100159	TCAAGGCTTCTTATGAAGCCCGCATGTGTGATGCCCACCTTCGAGG
ASCRP003796	0.401456	0.191	1.38394	-5.42493	0.207737	hsa_circRNA_103498	AGGTGTGCAGGCATAGCAAATGAATCTAAAAAGTTATATGGAGCAC
ASCRP001511	0.401456	0.191	-1.38389	-5.425	-0.403465	hsa_circRNA_101145	AAGACAAAGAACTCCCAAATGAGTTATTCTCCCCACCTCAGAAGTA
ASCRP000007	0.401614	0.191	1.38316	-5.42591	0.829768	hsa_circRNA_000046	GTCTCTTGAGGTGAGGGTGTGCAGCTTGGTAGGGATTGGGGTCCCT
ASCRP003703	0.401614	0.191	1.38276	-5.42641	0.201679	hsa_circRNA_103405	TGTCCTGCTGTTCCTTCCAAAGAACCTGCACTTGGTCTGCGTGGAC
ASCRP001626	0.402337	0.192	1.38118	-5.42839	0.280292	hsa_circRNA_101264	ATCCTCCTACAGGTGAGCTTTCCGTTGAAGAGGCGCAGGACCCTTT
ASCRP001316	0.402547	0.192	1.38041	-5.42936	0.296994	hsa_circRNA_100944	CAGTTCTCAGGACTGAAAGAGGTGTCCCCACTGCCTCTAAATCTCA
ASCRP003276	0.402636	0.192	-1.37983	-5.43008	-0.199126	hsa_circRNA_102969	TGACATTGAGTGTTTTCTTCACTCATGGTGAAGAATGGGGGAGATA
ASCRP004260	0.40306	0.192	-1.37872	-5.43146	-0.300018	hsa_circRNA_103980	ACCCAAATTGGTTTCCACGCTTTGAGAAGGACTGAATGAGATCATG
ASCRP000924	0.403473	0.193	-1.37763	-5.43282	-0.240702	hsa_circRNA_100544	TACAGAATGGACCCACCTTCAGCAATCAAAGAGAAGTACACAGACT
ASCRP002596	0.403632	0.193	1.3768	-5.43386	0.289537	hsa_circRNA_102268	AGCTCATGAGACAAGCAGTGTGTTTATTGCCGGCTTTCCTGAGTAC
ASCRP005054	0.403632	0.193	-1.3765	-5.43423	-0.183805	hsa_circRNA_104805	GGAGTAGGAGGCCTCAGGATCATTCAGCTCAGCAAACAAATACAGC
ASCRP004245	0.404447	0.193	-1.37478	-5.43638	-0.408064	hsa_circRNA_103965	CAAAACAGATAGAGAAAAGAATTGAATGATCTGGCACGGGACCCTC
ASCRP000450	0.405295	0.194	-1.373	-5.43859	-0.137661	hsa_circRNA_100060	ATGTTCCAGGGCATGAGAGTCAGGTGGGTGACATCACCATCCTGGT
ASCRP001684	0.405496	0.194	-1.37218	-5.43961	-0.135042	hsa_circRNA_101325	GCGTCTACAGGTGATCCCAAAACGAACCAACAGACCAGGCATCAGC
ASCRP004492	0.405496	0.194	1.37166	-5.44026	0.22939	hsa_circRNA_104220	CAGTGCTCCACACATGAAAATGGAATCATCAAGACAGATAAAGTAT
ASCRP005118	0.405496	0.194	1.37138	-5.44061	0.204932	hsa_circRNA_104871	CAACCCAGATAACAGTAAAACAGACCATCAGTAACATTTCAGGATT
ASCRP002560	0.405874	0.195	-1.37035	-5.44189	-0.121939	hsa_circRNA_102232	GGAGGTACAGCTATGACATGGTGCATTACGGCCACTCCAACCAGCT
ASCRP003983	0.407158	0.196	-1.36789	-5.44495	-0.372755	hsa_circRNA_103689	TGGTATTGAAAGCAACAAGTAATCCTTCCCCTCTACCACCGGATAT
ASCRP000434	0.408414	0.196	-1.36526	-5.44821	-0.557579	hsa_circRNA_100044	CATCAAGCAGCTGGTGGCCATGACTGGCTTTCGTGGATGTGTATGT
ASCRP001732	0.408414	0.197	1.36443	-5.44923	0.997921	hsa_circRNA_101373	AGACTAAAAGGAAAATGCTGTCCAGTGGGGTGTGTACATCAACTGT
ASCRP002954	0.408414	0.197	-1.36432	-5.44937	-0.234198	hsa_circRNA_102641	TGAACTGCCTGAAGAGCTCTATAGTATCAACCCTCCTTGCTCTTAT
ASCRP000947	0.408414	0.197	-1.36417	-5.44955	-0.205335	hsa_circRNA_100568	CATCCAGCACATTCACGATTTGCCTGAACATCATTATGAAACACTT
ASCRP004867	0.408749	0.197	-1.36322	-5.45074	-0.125764	hsa_circRNA_104614	GGTTATTCAGGCATTTCCGGAGAGTTCTTTTGAAGTCACTTCAGAA
ASCRP003862	0.409434	0.198	1.36084	-5.45367	0.221656	hsa_circRNA_103564	AATATCGACCTGAAGCTTCTTCTCAGCCTGTTGATAACCATGTTAG
ASCRP000916	0.409434	0.198	1.36077	-5.45376	0.281202	hsa_circRNA_100536	GGATTTGCAAGGAATGTATCCTGTCAGGTATAATGTCAGTGAATGG
ASCRP005021	0.409434	0.198	-1.36058	-5.45399	-0.448873	hsa_circRNA_104771	AGAGCTGACGGTGCCAAGCTCTCCTGATGAAATGTGTTCTGCCCCA
ASCRP001800	0.409434	0.198	-1.36041	-5.45421	-0.20742	hsa_circRNA_101441	ACCTGTCCAGCCCCCAGGTTTCCCTAGATGACAAATAAACATTCCT
ASCRP002671	0.409776	0.198	-1.35944	-5.45541	-0.321691	hsa_circRNA_102352	GTGGAAATCGTAAGAAAAAGCTCCCAAATTATAACCAGCCCCCTTC
ASCRP000020	0.410485	0.199	1.35789	-5.45732	0.144601	hsa_circRNA_000191	ATACTGTGACTGGGGGTAGGATGACATCTTTGCATCTTGCAACAAA
ASCRP003517	0.411475	0.199	-1.35591	-5.45977	-0.227024	hsa_circRNA_103219	TGCTATGAGGGCTAGCTTGTCACTTTCTGCAAAGGTTTCCCTCAGG
ASCRP001204	0.411978	0.2	-1.35469	-5.46127	-0.147468	hsa_circRNA_100830	TATTCCAGAGACTAGCATCCAGGATATTGCAGTCCTCTTCAACATC
ASCRP000267	0.414859	0.201	1.34977	-5.46732	1.05354	hsa_circRNA_001405	TGAATGGATGGTAGATGGAGGCAGGTGCATGTGTGATGGGAAGTGT
ASCRP001837	0.415027	0.201	-1.34873	-5.46861	-0.210661	hsa_circRNA_101486	GAAGCAACAAACTGCACTTTTCCCACAGTCAAATCACTCGCCTCTA
ASCRP000005	0.415027	0.201	-1.34865	-5.46871	-0.275685	hsa_circRNA_000041	GCAGGTTGAGGATTTTATTTGATCCCTGCTCTAATTTTTAGCTTCA
ASCRP003925	0.415225	0.202	1.3479	-5.46962	0.533337	hsa_circRNA_103630	TAATTTAAGCAAAATCAGGTTGGAGTTGCTGTGGGTGAGCTGCTGT
ASCRP002916	0.41525	0.202	-1.34688	-5.47088	-0.152604	hsa_circRNA_102603	TGTCCTCAACGCACTTGTCCAGGAACCAGTGACCTTCAAGGACGTG
ASCRP002128	0.41525	0.202	-1.34662	-5.4712	-0.253744	hsa_circRNA_101782	AATCACACCTCTAATCAGCACCAAGGTTGGTCAAAGTCACTCTGTA
ASCRP005160	0.41525	0.202	-1.34657	-5.47125	-0.152616	hsa_circRNA_104913	TTCTGTATCTTAAGGCAGAATCCAGAGACCACATTTGAAGTATATG
ASCRP005191	0.415741	0.203	-1.34538	-5.47272	-0.324727	hsa_circRNA_104944	TAGTCTTTGGCCAGGGGCAACACCCTCCACTAAAGAGTCAAGCCAG
ASCRP003727	0.416229	0.203	-1.34419	-5.47418	-0.160712	hsa_circRNA_103429	AAAGTCATCTACATTTCAGGTGCCTTAGCTGGACCAATTATTGTGG
ASCRP001194	0.417157	0.203	1.34232	-5.47646	0.113859	hsa_circRNA_100820	ATGCTGCAGTGGACGGGGTTGCTACCAAATCCATCAGACCACGCTA
ASCRP003534	0.41738	0.204	-1.34154	-5.47741	-0.138638	hsa_circRNA_103236	CCACAATCTGATGGGAATGATGAACAACCCCAATCCTTATGGTTCA
ASCRP005221	0.417479	0.204	-1.34067	-5.47848	-0.381602	hsa_circRNA_104974	TAAAAGAAGAAACCTTGAACGACAAAGTTTTCCCCCCACGACCTGA
ASCRP001688	0.417479	0.204	1.3403	-5.47893	0.126159	hsa_circRNA_101329	TTAACTTATATCTGCCTGTCAGATTCACTGCGTGCTGTCCTCACTT
ASCRP003962	0.417479	0.204	-1.33986	-5.47947	-0.342544	hsa_circRNA_103668	TTTAATACACAGCAGCAGCAGCAAACTAGTGGGTTTGGAGGATTTG
ASCRP005343	0.417479	0.204	-1.33967	-5.47971	-0.189507	hsa_circRNA_400047	AAGAGGAGTGACTCATCATCAGTAAGCGGCTGAAAGCGTGTGGGGC
ASCRP004522	0.41845	0.205	1.33774	-5.48207	0.192083	hsa_circRNA_104251	TTCTTTGTGGTGCTCACCTTCATCGTCACTGCTGGCGCCCATGCGG
ASCRP002559	0.418607	0.205	-1.33706	-5.48289	-0.295123	hsa_circRNA_102231	CTTTAAGAAGCTGGCAGAGAGGCTGATGACATCGTGAACTGGCTGA
ASCRP002066	0.418825	0.206	1.33594	-5.48426	0.13413	hsa_circRNA_101719	GGATCACAGGGATGCCCAGGTGGACCTGTTTCGTGACATCACTTTC
ASCRP003189	0.418825	0.206	-1.33532	-5.48502	-0.359756	hsa_circRNA_102881	TACCAGGAATCACTCACTCAGACTGGGAGGCACGCATTGACAGCCA
ASCRP003626	0.418825	0.206	-1.33522	-5.48514	-0.189036	hsa_circRNA_103328	ATATTCTGAGAATGCATCTACTCATGCCTCGAAATCTCCTGACAGT
ASCRP001507	0.418825	0.206	-1.33499	-5.48542	-0.380995	hsa_circRNA_101141	CTTAGATTGTTATGAAGTGAGTTATTCTCCCCACCTCAGAAGTACC
ASCRP005261	0.418825	0.206	1.33458	-5.48592	0.137071	hsa_circRNA_105014	ATTATGTGAAACCTCCAAATGTGGGTGGCAGCAAATGCACACATTC
ASCRP001907	0.419542	0.206	-1.33305	-5.48779	-0.386024	hsa_circRNA_101556	ATGTCCATCCACAAGAGCCAAGTAAGGTACACAGATTTGAGGCTAT
ASCRP003726	0.419618	0.207	1.3325	-5.48845	0.45101	hsa_circRNA_103428	TCAAATCTGTGTGGAGCAGGTGCCTTAGCTGGACCAATTATTGTGG
ASCRP003685	0.420405	0.207	1.33086	-5.49045	0.317554	hsa_circRNA_103387	TCTCTACAAGCCAGAGTCTTTCCACCTTGGCTCTCATCGAGGAATT
ASCRP003072	0.420981	0.208	-1.32922	-5.49244	-0.398674	hsa_circRNA_102761	GCCATGAAGCAAAATCAAGTGACGGATACTAATAGAAAACTACAAC
ASCRP004969	0.420981	0.208	-1.32905	-5.49265	-0.267174	hsa_circRNA_104718	GGGACAGCCTCTCAGTGTGGAGGCTGCTGGCCCTGCCATCTGTAAG
ASCRP001426	0.420981	0.208	1.32815	-5.49374	0.133133	hsa_circRNA_101058	TAATGAAAAACAGTTGCCATTGCCCCAAATGGAGCCTTACAGTTGG
ASCRP005368	0.420981	0.208	1.32773	-5.49425	0.201468	hsa_circRNA_400074	CCTCTGCCTTGTTCTAGAGGCTCCACTGCTGGCATCTGTCCAGTGA
ASCRP001249	0.420981	0.208	-1.32758	-5.49443	-0.733335	hsa_circRNA_100876	CTCCTACAATGTTGATATGTCAGATCTCTCTCCAGAAGAGCAATGG
ASCRP001222	0.420981	0.208	1.32724	-5.49485	0.177966	hsa_circRNA_100848	CTTCGTGAAGACTTTGAGCAAAGCATGGTCCTGGTTGCCTGTGGAC
ASCRP005295	0.420981	0.208	1.32698	-5.49516	0.188182	hsa_circRNA_105051	ACATCTGGAAGGACTTGGACCCTCTGTGGAACACCCGAGTACCTAG
ASCRP001359	0.421457	0.209	-1.32474	-5.49788	-0.512309	hsa_circRNA_100988	TGTCACACCTCAGTTACCTCAGGGAAAGAGGCTCTGTCGGTGGTGA
ASCRP002289	0.421457	0.209	1.32469	-5.49794	0.142712	hsa_circRNA_101948	ATACTCCTACGGGTCCTTGCTCCCTGCCTTATCCTGTGTTCAGACA
ASCRP000469	0.421457	0.209	1.32453	-5.49813	0.326597	hsa_circRNA_100079	GACATTCCAGGTTGATTCTTCACCACACTGAAACCATTAGGAAAAA
ASCRP001810	0.421457	0.209	1.32377	-5.49905	0.213445	hsa_circRNA_101459	AAACCCTATGATTTCATCGTTTCTTGGATGTCAACAGCCACAAAAT
ASCRP001538	0.421457	0.209	-1.3237	-5.49915	-0.533089	hsa_circRNA_101175	AATGTAGACCATCCCATTCATCTAGGAGCGCATTTGTAGCCATGAA
ASCRP002074	0.421457	0.209	1.32369	-5.49915	0.402064	hsa_circRNA_101727	TATTCAGAGACTGAGAAGGAGGTGGCTGGCCGTGCGGCTGGAGTGT
ASCRP004365	0.421643	0.21	1.32288	-5.50013	0.195857	hsa_circRNA_104092	CATCCTTCGCCTCTTCAAGGTTGGTAGGAGGAGAGGATTGGAGCTG
ASCRP000151	0.421643	0.21	-1.32255	-5.50053	-0.180765	hsa_circRNA_000921	TGCCAGGCAGGTGAGAGGGTCAGGGGGATCAAGCAGGGTACATGGG
ASCRP001943	0.421819	0.21	-1.32147	-5.50184	-0.118843	hsa_circRNA_101593	TTCTGCACGGGGTCATCTAGTAGCAGGCACCCAAATCAGGCAACTC
ASCRP004642	0.421819	0.21	1.32143	-5.50189	0.532262	hsa_circRNA_104381	TCATGACTGAACAGTGCTCCGTATGTGGATGTGATCTGTTTGAACA
ASCRP002404	0.423559	0.211	-1.31747	-5.50667	-0.224961	hsa_circRNA_102069	AAATTGGCTTCCTGAATGACAAGGGTTTTCTCCAGGGATTTAAGGG
ASCRP004548	0.423559	0.212	-1.31692	-5.50734	-0.492463	hsa_circRNA_104283	AGAAACTCATCAGGATTTATCCTGGCCCTGCCCTGGGAGAAGCCCT
ASCRP003822	0.423559	0.212	-1.31656	-5.50778	-0.159996	hsa_circRNA_103524	AATGTCATGACCTACCTGACTAGCATCCCCAGATGAAATTATGCAG
ASCRP004843	0.423559	0.212	1.31625	-5.50815	0.167588	hsa_circRNA_104590	CAAAGATAAGATCCTGTCTACCTTTCATGACCAACTACAGTTTTCA
ASCRP002911	0.423559	0.212	1.31614	-5.50828	0.492205	hsa_circRNA_102598	TCTCTGGCATCTTCTTCATACTATCGGAGACAGTGCGCACGGCCAC
ASCRP004933	0.423559	0.212	-1.31611	-5.50832	-0.235371	hsa_circRNA_104680	ATTTAAAATTCAACCCCCAAGGCGAAGGCATGCAATCCACAGTAGT
ASCRP001443	0.423559	0.212	-1.31579	-5.50871	-0.339357	hsa_circRNA_101075	AATCAATGTCAGTTTTTGGCTTTCACCCCCAACCAGTGACCAAAGA
ASCRP000871	0.423943	0.212	-1.31477	-5.50993	-0.182656	hsa_circRNA_100488	CTGCTTCAGTGCAGTGAAGAGAGATGCAGGTCAGCTCCTCCAGTAC
ASCRP002147	0.424333	0.213	-1.31375	-5.51116	-0.148058	hsa_circRNA_101802	AACAGCCTGGGGTATCAAAAAGCCATTCACAGAGGTCATCCGAGCC
ASCRP001705	0.424345	0.213	1.31331	-5.51169	0.243701	hsa_circRNA_101346	AACCTTACTGGTGTACTTTTCCCAACACTGGTGCTCGTATCATGAT
ASCRP000192	0.424904	0.213	-1.31203	-5.51323	-0.125844	hsa_circRNA_001067	TCTCCACTTTCTCCCCGTTTACCAGTCTAAGGGGTTGACACAGTGA
ASCRP001484	0.425308	0.214	1.31099	-5.51448	0.181562	hsa_circRNA_101117	CTACACTCAGCGTGTTCCTGCCATCCAGTAGGATCAGCTGTCCTTC
ASCRP005151	0.42664	0.214	-1.30853	-5.51744	-0.372449	hsa_circRNA_104904	CCATTCCCCACCAAAGGGAAAGGACAGTCCCAAACCAGAGTGAATA
ASCRP004910	0.427095	0.215	1.30723	-5.519	0.122798	hsa_circRNA_104657	GACTTTGACTTTGCTATTTTTATGATTCCCACAAATCCACCACCAA
ASCRP003518	0.427095	0.215	-1.30642	-5.51997	-0.204151	hsa_circRNA_103220	GGCTATCCCTATCAGCCGCATCGAGTATATCCACTCCAAGAACTTC
ASCRP000861	0.427095	0.215	-1.30597	-5.52051	-0.160202	hsa_circRNA_100478	GTTTGCACAGAGTCAGATGGAGTTCAGTATCTCCGCCCTATCCATC
ASCRP002031	0.427095	0.215	1.30589	-5.5206	0.231348	hsa_circRNA_101684	ATGGATGGAGGCTGCTCTTTGGCGTAAATTGCAATCGATTAGGGAT
ASCRP002103	0.427095	0.215	-1.30533	-5.52128	-0.307205	hsa_circRNA_101757	AGTATAATCGGCACAAGCCCCCCAAGCAGGTACAACGCCGTCACCG
ASCRP002970	0.427095	0.215	1.30517	-5.52147	0.153608	hsa_circRNA_102657	TTATACAGCTAAAGCCATGGAAAGCCGGAGAATTTTCATCCTTGGG
ASCRP001510	0.427095	0.216	-1.30488	-5.52182	-0.305618	hsa_circRNA_101144	CCTTGATGCCATTCTAGTGAGTTATTCTCCCCACCTCAGAAGTACC
ASCRP004973	0.427344	0.216	1.3037	-5.52323	0.250104	hsa_circRNA_104722	AATCATTCTGCACTTCCAGGTGAAGCTGGTGAACATCAGGAATGAT
ASCRP004664	0.427344	0.216	1.30366	-5.52328	0.199208	hsa_circRNA_104404	CGCAGCAGAGAGCTGCCCTCCTCGGAGCACCTGAGTGTGGCAGATG
ASCRP001383	0.428382	0.217	1.30161	-5.52574	0.124243	hsa_circRNA_101013	TTGGGAGAATAGCAGATAACTGTGTCCAGAGGACCCCCAGGCCATC
ASCRP002206	0.428382	0.217	-1.30087	-5.52662	-0.206837	hsa_circRNA_101863	TGAATCGGATGAGCACTGAAAGAGCCCCAGTGACCCTTCACCTCGA
ASCRP000436	0.428382	0.217	1.30081	-5.52669	0.152464	hsa_circRNA_100046	AGTTTGAGAAAGTCTCTACAGACCTTGGCTATTCAGGCAGCTATCA
ASCRP002840	0.42967	0.218	-1.29843	-5.52954	-0.158059	hsa_circRNA_102527	TACTTGTTCAACTGCCCGAAACCATGTTAATAGAATGTGCCTGGCA
ASCRP001102	0.430362	0.218	-1.29696	-5.5313	-0.262849	hsa_circRNA_100728	CACTCCAAGTGTCCCAATATTGAAGCCCATGGATCTTATGGTAGAA
ASCRP004178	0.430946	0.219	1.29536	-5.5332	0.639122	hsa_circRNA_103898	GATTAATGTCAATGATTTGCATCTGCTGGTGATGATGGAATTGTAG
ASCRP002059	0.430946	0.219	-1.29515	-5.53345	-0.166254	hsa_circRNA_101712	CTCTGCCTGCGAAGGAGCGATATATAGTTATCAGCAAAGTAGATGA
ASCRP001093	0.430946	0.219	1.29481	-5.53386	0.812797	hsa_circRNA_100719	GGTGGTGAAGTAGTGAAGCTTTTTATAACTATGATGCCAGAGGAGC
ASCRP004477	0.431507	0.22	1.29283	-5.53622	0.503643	hsa_circRNA_104204	CTCTGTTGGCTATATATTATGTTTGTTGTAGCAGTGTTCTGGATCA
ASCRP003777	0.431507	0.22	-1.29276	-5.5363	-0.180585	hsa_circRNA_103479	AGACACCTTGCCATCCTTACCCGACCTGGGATGGAGATCACCAAAG
ASCRP002680	0.431507	0.22	-1.2927	-5.53637	-0.228557	hsa_circRNA_102361	ATCAAAGTATGGACACAGGTTCGATACAAGAGGCTGTTTTCCTAGC
ASCRP000201	0.43252	0.22	1.29074	-5.5387	0.156174	hsa_circRNA_001100	TTGATCTTCCGGTACTTCTCCTCCTCGGGGTGCAGGATGGAGTCCG
ASCRP002964	0.432744	0.221	-1.28998	-5.5396	-0.387305	hsa_circRNA_102651	TGGTACCTGATGATCGAAAGATATCCTTCTTTCCAGAGTCAGGACA
ASCRP004991	0.433637	0.221	1.28821	-5.5417	0.22376	hsa_circRNA_104741	TGTCAGTATCCTGCTTCACTTCCAGGAACATGTTTGACAAGCTGAA
ASCRP000129	0.433737	0.221	1.28744	-5.54262	0.145941	hsa_circRNA_000815	TAGTTTTCCTGTCTCATAATGCTAAAACAGGGTGTAGGTATGCCCT
ASCRP005332	0.433737	0.221	1.28722	-5.54287	0.41195	hsa_circRNA_400036	CTTGGTAAACATTTATGTGAGGAGGCTGGGTGCTGAATTATGGTGA
ASCRP000180	0.434709	0.222	-1.28534	-5.54511	-0.33613	hsa_circRNA_001038	CACCCACCAGGCCTGGACACCCCCTGAAGCCACCTCTCCGCCCGCA
ASCRP003364	0.435353	0.223	1.28395	-5.54676	0.176593	hsa_circRNA_103059	AGATGCAAAGGTTCAAGCACTGTCTTCCTGTTGGCCCTGACAATCA
ASCRP001305	0.435771	0.223	-1.2829	-5.548	-0.112738	hsa_circRNA_100932	ACTTTCCGCAGGCCCCGGGGATGGCCTTTACCCTTGAAGAAAGGCT
ASCRP000984	0.437376	0.224	1.28006	-5.55135	0.1596	hsa_circRNA_100609	GAAAAGTGCCTGAGTATTTTCTGCATTGCGTGCTGTTCCTCAAAAA
ASCRP000174	0.437795	0.224	1.27902	-5.55259	0.663143	hsa_circRNA_000997	TCCAGGATTTGTAGGTAGTCAGGTGGTGAGCCAAGTGGGCCAGGTA
ASCRP004761	0.437892	0.224	-1.27845	-5.55325	-0.60275	hsa_circRNA_104507	TGCAGTCCAGATATTACAGGTATGGCCTCACATGTGCAAGTTTTCT
ASCRP000606	0.437893	0.225	-1.27803	-5.55375	-0.225631	hsa_circRNA_100218	AGACGACTCATGCCCTGCAGGAGTCATTAAATCAAAACTTCATGCT
ASCRP004464	0.438694	0.225	-1.27641	-5.55566	-0.166818	hsa_circRNA_104191	GTAGATACAGCACCAACGGTCAACAAAAATCTCTCATTTACTTCAC
ASCRP002804	0.438906	0.225	-1.27568	-5.55653	-0.242673	hsa_circRNA_102487	CCCAAGGCAGGGAACGGGCTGTTGAGGAAGAAGACGCTGGTCCCAG
ASCRP005203	0.439667	0.226	-1.27375	-5.5588	-0.188682	hsa_circRNA_104956	CGATAACCGGGTGCTGCCCACCAACCCTGAGGAGAGCTGGCAGGTG
ASCRP004635	0.439667	0.226	1.27329	-5.55934	0.146848	hsa_circRNA_104373	CGCAAAGCAGGACAAGGTGGAGCAGACACCTCGCAGTCAACAAGAC
ASCRP005328	0.439667	0.226	1.27328	-5.55934	0.153964	hsa_circRNA_400032	ACAATTAGATGTTGCTCACAGGTAGGTATTGGACCAGGGTCAAGAA
ASCRP004414	0.439754	0.226	1.27274	-5.55999	0.194664	hsa_circRNA_104141	GGATATTTACTGTGAAGTATTACAGACACTTAGCACCTGATCACTT
ASCRP001263	0.439998	0.227	1.27185	-5.56102	0.128548	hsa_circRNA_100890	ATATTGTTACATGTGGTAGGAATGGGATCCTGGTGCTTCCACATGA
ASCRP001395	0.439998	0.227	1.2712	-5.56179	0.384512	hsa_circRNA_101025	ACCATATTAAATCTGGAGAATGGTGTTGAACGCGTGTGTCCTGAGA
ASCRP000314	0.439998	0.227	-1.27112	-5.56189	-0.583061	hsa_circRNA_001676	AAAGGCCACCCAGCCCTGTAAGACCAGTAATAAATTTCTGTCTACT
ASCRP000354	0.441436	0.228	1.26855	-5.5649	0.470198	hsa_circRNA_001950	ATGGGGCCTGGCGGGCTTTGGGCTTTACTATATATGGATGGATCCA
ASCRP002543	0.442222	0.228	-1.26696	-5.56677	-0.214082	hsa_circRNA_102215	GTACCTGGATGACAGCATCAAAGATGAAGAAGAAGAGACAGTCTTT
ASCRP000421	0.443807	0.229	-1.26399	-5.57025	-0.203741	hsa_circRNA_100031	AAGTGCTGGACCGAGGACGAAGTGGTCCACAACTCCCAGGCCTGTT
ASCRP000769	0.443807	0.229	-1.26377	-5.57051	-0.15652	hsa_circRNA_100384	ATCAATTGGGAGGTTGTTGAGGCATCTTCATTAAGCTGGAGTACCA
ASCRP004004	0.44534	0.23	-1.26107	-5.57366	-0.209699	hsa_circRNA_103711	GAAAAGAATGGATGTGGAGCCACCCAAAATTTCAAGCACAAAAAAC
ASCRP005359	0.445622	0.231	-1.26024	-5.57464	-0.135845	hsa_circRNA_400065	TAGGAGAGAACTGTGCCCAACTCTCTGTGGGGGACCTGTACGCCAC
ASCRP002530	0.445934	0.231	1.25936	-5.57566	0.152358	hsa_circRNA_102202	GAGAACTCAGGGGAAGGAGAAGTTCCTGGGCATCCTGAACAAATAC
ASCRP000432	0.446494	0.231	-1.25811	-5.57712	-0.23293	hsa_circRNA_100042	AGTACAACCAGCTCCTCAGGTGCAAGCTGGCCCAGGCCAATGGTTG
ASCRP002029	0.44683	0.232	1.2567	-5.57876	0.261622	hsa_circRNA_101682	ATCATTTTACCAGGATGATCTGTCTGCTGTGCGTCCGGACCGCGTC
ASCRP004634	0.44683	0.232	1.25652	-5.57897	0.146713	hsa_circRNA_104372	CGCAAAGCAGAGGATGATGTGGACCTGGAAGCCCTGGTGAACGATA
ASCRP001661	0.44683	0.232	-1.25637	-5.57915	-0.111252	hsa_circRNA_101301	AAAGCTGCGATTGATTATTGATACACCCACAAGTCCAGTGACAAGC
ASCRP001170	0.447	0.232	-1.2557	-5.57992	-0.164128	hsa_circRNA_100796	TCGACAACAGGGACAGCTGTTTCAACCACACCACGGGCTTTTGACC
ASCRP003793	0.447893	0.233	-1.2534	-5.5826	-0.142888	hsa_circRNA_103495	CAGACTTGAGGGCCGTTGCTCCAGGGAGAACTGCAAATATCTTCAT
ASCRP002755	0.447893	0.233	-1.25272	-5.58339	-0.146406	hsa_circRNA_102436	CTGGGGGACTCACGGATGATACCATCGGGGACCTTAAGAAGCTGAT
ASCRP005323	0.447893	0.233	1.25233	-5.58384	0.982609	hsa_circRNA_400027	TGGATCGATGCATTTGCAGAAACAAAGATTGTGTGTGGATCGATGA
ASCRP002237	0.447893	0.234	1.25218	-5.58402	0.176632	hsa_circRNA_101895	CATGGAGAAGGTCCTGGCAATCCCTCCCTTTCTAAAGTAGGTACCG
ASCRP004048	0.447893	0.234	1.25168	-5.58459	0.416862	hsa_circRNA_103757	GTGTTCTCAGAAGTGTCATTGTTGCAGCAAAAAAGTCAGCAGTCTC
ASCRP004299	0.447893	0.234	1.25165	-5.58463	0.126398	hsa_circRNA_104024	CCTGAACCAGTGTCAACCTAAGAAAAAGTCTACGCCACTGAAGTAT
ASCRP005284	0.447893	0.234	-1.25131	-5.58503	-0.37547	hsa_circRNA_105037	TTGTACACAATTAGGAATACACCATTGACATCATCTTCTCCCAGAC
ASCRP002447	0.447893	0.234	-1.25082	-5.5856	-0.14416	hsa_circRNA_102115	TGCCATGAGCGGCTGACGAGGTTCCCCTGAAGATCCTGGCCCATAA
ASCRP000695	0.447893	0.234	1.25047	-5.586	0.190085	hsa_circRNA_100308	AATATGCCACAAGTCTGTGCTGGATGCCCTGGAGGAACAAGGAGGC
ASCRP003418	0.447893	0.234	1.25024	-5.58627	0.373208	hsa_circRNA_103114	GATGAAGTTGCCTCGTCACGTGTTCAATATGCTAAAGAAGTATGTC
ASCRP004885	0.447929	0.235	1.24939	-5.58726	0.18381	hsa_circRNA_104632	TGATGAAAAGGACAGCTTTCCTGCCCGCTTTGGAGGAGTCCACTTT
ASCRP002393	0.447929	0.235	1.24935	-5.5873	0.128548	hsa_circRNA_102058	GAGACTCAGGATAACAGATAGCACATTAATCCAACTTTCTATACAC
ASCRP001043	0.447943	0.235	-1.24892	-5.5878	-0.195394	hsa_circRNA_100669	CTCTGAAAAAGTTTCTCAGTTTGGGTGCAGATCATTTGCTTTGCTT
ASCRP001590	0.447998	0.235	-1.24778	-5.58912	-0.404163	hsa_circRNA_101227	TTTGCCTTGGAATACAGGAGGGTTCAGCACCACCCCCTTCTCCAAC
ASCRP003805	0.447998	0.235	-1.24768	-5.58924	-0.243823	hsa_circRNA_103507	CAGTCTGCAGCTACTCAGGTAATTCAACAGGCATTGCATCGGCCCC
ASCRP001224	0.447998	0.235	1.2476	-5.58933	0.730765	hsa_circRNA_100850	CCATCGTGGGGTGGTGAAGGTGGGTCTGGTTGAAGACTCTCCCTCC
ASCRP005198	0.449256	0.236	-1.24529	-5.592	-0.216319	hsa_circRNA_104951	ACGATCCTCGAATTCAGCACAGACTCTCAGCGTTCTCATCTCTCTT
ASCRP003334	0.449256	0.236	-1.24449	-5.59293	-0.156446	hsa_circRNA_103028	TTCCTGCCCAAGAAGGTGCAGTGGTCCAGCTGCAACATCTTCTCCA
ASCRP003340	0.449256	0.236	1.2444	-5.59303	0.256621	hsa_circRNA_103034	AGTGGTCCAGGGGAAGGTGCTATTAACCTGGCTTTGGCTCAGAACC
ASCRP004354	0.449256	0.236	1.24409	-5.59339	0.235955	hsa_circRNA_104080	TGCTCTTCAGTACCCTCAGGTGACTACAGATGTGTTAACACCCAGC
ASCRP004224	0.450131	0.237	1.24239	-5.59536	0.470393	hsa_circRNA_103944	GATATTGAAGTTACGACCACCTCAGCCTCCAGTGTATCTCTTTGTA
ASCRP000847	0.453173	0.239	-1.2375	-5.601	-0.129686	hsa_circRNA_100464	CAGAGAAGAGCAGCCAGTTCCTTTATAGTTTTGTTCAGAAAAACAT
ASCRP001456	0.454037	0.239	-1.23581	-5.60293	-0.156725	hsa_circRNA_101088	TGTGCCAGAGGGTGCCATGTTTGAAGGGTGCCGGAAGTCATACTCA
ASCRP001942	0.454202	0.24	-1.235	-5.60387	-0.367234	hsa_circRNA_101592	TCTTGTAGCAGCGCCTCCTCGATGCATCACTGTAAGCGATACCGCT
ASCRP002035	0.454202	0.24	-1.23411	-5.60489	-0.260432	hsa_circRNA_101688	AGCAAACAAGTATGACGCCGTGCCCATCCAGTCCAGCGTGGTGTTA
ASCRP001036	0.454202	0.24	-1.23406	-5.60494	-0.134251	hsa_circRNA_100662	ACACACAAAGCAGGCTCTAAGCAGAATAAATTCCCTGAAAAAAGAA
ASCRP003095	0.454202	0.24	1.23393	-5.6051	0.178284	hsa_circRNA_102786	TGGAGTTGCCATCTATGTTAATGGATACACAGAAGCTCCACCATGA
ASCRP003597	0.455171	0.241	1.23202	-5.60728	0.12974	hsa_circRNA_103299	ATCCAGGAAGATTGTCACGGATTCTGCCTCTGTGGAGCGTTTACTG
ASCRP001743	0.455171	0.241	1.23148	-5.60791	0.161148	hsa_circRNA_101384	TTTGGCCCTGTTTGATAGTGATCCTGGTGGAGGGATTGAAATGTCT
ASCRP001610	0.455171	0.241	1.23127	-5.60815	0.202403	hsa_circRNA_101247	CATTAGCTATCAACAGCCTTGCTTCCTGTTTTACATCACAAATCTA
ASCRP003199	0.455254	0.241	1.23074	-5.60876	0.116363	hsa_circRNA_102891	TTCGTGGGGTCACAGAACAATAAAAGAAAAAGAAGCAAGTCCAAGC
ASCRP002896	0.455898	0.242	-1.22936	-5.61034	-0.149242	hsa_circRNA_102583	GGACAATCTGTATGATGAGCTGCCGCACTACCCAGGCATCGTGGAT
ASCRP004701	0.455898	0.242	-1.22898	-5.61078	-0.20404	hsa_circRNA_104445	TGTGCTCATATACACCTGCTGCCCCAGAGCACATCAGCTATGTGCC
ASCRP001440	0.4563	0.242	-1.22798	-5.61192	-0.211056	hsa_circRNA_101072	CAGTCCCCTACAAGAGTATCGAGATCGTTATGATTCAGACCGGTAT
ASCRP003701	0.457076	0.243	-1.22558	-5.61466	-0.237568	hsa_circRNA_103403	TGAAAATCCCAGAGAGCCCACTCCAGTTCTACGTGAACTACCCCAA
ASCRP003708	0.457076	0.243	-1.22554	-5.61471	-0.584139	hsa_circRNA_103410	TCTCTCTTTCTAAACCTGAGTTACAACAAACTCTCTGAGATTGACC
ASCRP003538	0.457076	0.243	-1.22524	-5.61506	-0.128911	hsa_circRNA_103240	TACTTCACCATGGTCGACACTACCCCTAAAGCAAGAAGAATATGAG
ASCRP003516	0.457076	0.243	1.22468	-5.61569	0.473748	hsa_circRNA_103218	CTACATTGATAAGGTGACCCTGAGAGTGTGGCTGGGGAGTATGGGC
ASCRP002893	0.457076	0.243	-1.22461	-5.61577	-0.191702	hsa_circRNA_102580	ATATGCGCCGCGCCATGCTTCTTCTAGCGATGACTTCTCTGACTTC
ASCRP002312	0.457076	0.243	1.22439	-5.61603	0.329822	hsa_circRNA_101972	GAGAGCCAAGGTGGAACGGCACATGTGTGATGGGGACATTGTTATC
ASCRP003656	0.457921	0.244	-1.22251	-5.61816	-0.215171	hsa_circRNA_103358	AGACCCTTCTACTCCTGGAGGGTCCATGCCTTTTTAGAGCAGTGGG
ASCRP004200	0.457921	0.245	-1.22154	-5.61928	-0.297696	hsa_circRNA_103920	TGGAACCCTGATCGGCTTCAGCTCCCCAGGAATATGATTGAAAACA
ASCRP003220	0.457921	0.245	1.22152	-5.61929	0.541399	hsa_circRNA_102912	GCTTCTATTAAGTACTAACATTCTGAGAGAGCCTGTGTGTTTAGGA
ASCRP001631	0.457921	0.245	-1.22151	-5.6193	-0.351295	hsa_circRNA_101270	GGAGTTACAGAGAGTATCTTTCAGATGAAGGCATTGAAGCTTGCAC
ASCRP004488	0.459749	0.246	1.21844	-5.6228	0.217342	hsa_circRNA_104215	TGTATCCAGGTGCATGTTACAGGCTCCAGACCCAGTTCCTGGACCT
ASCRP004503	0.459982	0.246	-1.21739	-5.62399	-0.162783	hsa_circRNA_104231	AGTCCAGAAGGGTTGGATGACTGCCTGCAACAATATGTCCACAAGT
ASCRP000282	0.459982	0.246	-1.21728	-5.62412	-0.146668	hsa_circRNA_001486	TCAATGTCTTCTTCATGGCTCAGCCCAAGGATGGCATGTTGAAAAC
ASCRP004168	0.461314	0.247	-1.21494	-5.62678	-0.213224	hsa_circRNA_103888	AGAAAAGAAGGTTGGTGATTTGGATATCAGCTATATTAATATAGAG
ASCRP004883	0.461441	0.247	-1.21417	-5.62765	-0.190198	hsa_circRNA_104630	TGTAGAAGAGGCAGGGCAAGAATCCTTTCGTTCCATCACAAGGTCG
ASCRP001338	0.461441	0.248	-1.21311	-5.62886	-0.198606	hsa_circRNA_100966	CCACCACTATTAAATTGACGTGAGTGAATTCAGATATAACTCAAGC
ASCRP000389	0.461441	0.248	1.21309	-5.62888	0.659884	hsa_circRNA_002172	TTGGAACAGACTCACGGCCAGCGAAGTGAGTTCCCAGAGAACGGGG
ASCRP000997	0.461441	0.248	-1.21306	-5.62891	-0.420959	hsa_circRNA_100623	ATTATATCTCCACCACTTCCCTTTGGAAAACCTCCTGATGAGAATT
ASCRP003840	0.461441	0.248	1.21271	-5.6293	0.238328	hsa_circRNA_103542	TGACTTGTTGGAATGGAAGTTGGATACACTTTGTGACTTGTACGAG
ASCRP000153	0.461796	0.248	1.21155	-5.63063	0.410348	hsa_circRNA_000926	GGGTGATGTGGAAAAACTTTCTGCCTTATTTTTTGAACAATTGAGC
ASCRP004779	0.461796	0.248	1.21138	-5.63081	0.122797	hsa_circRNA_104525	AAATTTTCTCCTGGTAGACCTCGGTCCAAACAGCGATGTGCATTTT
ASCRP005227	0.46394	0.25	-1.20786	-5.63479	-0.335792	hsa_circRNA_104980	AGAAGCCAGAAAGAGGATAACAAAGCCATTGACCTTTGCCGATTGT
ASCRP001278	0.464137	0.25	-1.20717	-5.63557	-0.187337	hsa_circRNA_100905	TAATGAAGATGGCCCTCAGCACACGAGCTTTTACTCAAGTGTTTAC
ASCRP000719	0.464947	0.25	-1.20559	-5.63736	-0.285713	hsa_circRNA_100334	TAACTACAAGTGAAGCCTTCTCCTTCCAAAAAGTTTCGGTCTGGCT
ASCRP004322	0.466797	0.252	1.20251	-5.64083	0.164127	hsa_circRNA_104048	CTTCCTGTGGCCACTCCAGATTGCTGGACTCGCTGAAGAGAGACTA
ASCRP005302	0.4672	0.252	1.20152	-5.64194	0.232647	hsa_circRNA_400006	TGGGGGAAATAGAACATGATTTACCCACCCTAAAATGCATTGAAGG
ASCRP001089	0.468513	0.253	1.19914	-5.64461	0.200819	hsa_circRNA_100715	ATTTGTGAAGGGTTCATAGTGGCGTCATGCACGCAGACTCCTGCAA
ASCRP001045	0.468513	0.253	1.19882	-5.64498	0.158801	hsa_circRNA_100671	TACTCCATGGCCTTGATAAATTTGCTGAAGTTCCTTATGTCAAATG
ASCRP002540	0.469178	0.254	1.19719	-5.64681	0.201817	hsa_circRNA_102212	AAGATCACCAAGTGAAGTGCTCCGTGTGCAAGAGCGTCTCGGACAC
ASCRP005086	0.469178	0.254	-1.19705	-5.64697	-0.255119	hsa_circRNA_104838	ACGCTATTCCTCTCACATCGCCTTTGTTTTGCCATTCTCTACAGCA
ASCRP004257	0.469535	0.254	-1.19582	-5.64834	-0.136907	hsa_circRNA_103977	CCGGGAACCTGAAGCCAAAAAGAAGTATGACAAAGAGACAGAAAAG
ASCRP005223	0.469535	0.254	1.19572	-5.64845	0.177628	hsa_circRNA_104976	ACGGAAGATGGCTGCCTTGGAGTTTTCATAAGAAATTGTCCCTGGA
ASCRP001444	0.46966	0.254	-1.19487	-5.6494	-0.448352	hsa_circRNA_101076	TCCAAACGATTCCCCCCCGAAGGGCGTGACCATCCCGTACCGGCCC
ASCRP000556	0.46966	0.254	1.19473	-5.64956	0.112947	hsa_circRNA_100167	TGTTCTCCAAGAACCACCTAAAGGTCCACAAGGCGATTACAATTTC
ASCRP001195	0.469825	0.255	-1.19409	-5.65028	-0.114244	hsa_circRNA_100821	GAGATGCCAGGGTCTGTCCCCTTACGCAAGAGCCTCTGCTCCCCCA
ASCRP003720	0.471365	0.256	1.19147	-5.65321	0.243605	hsa_circRNA_103422	TATCAACTGCTTTCCACTTAGATTCAGACCTGACCAGCTTTCAGTG
ASCRP001639	0.472528	0.256	1.1894	-5.65552	0.623337	hsa_circRNA_101278	TTGGAAGTTTTTCTGATCTGTGGTTGTGGTTCCGGAGAATCTGGTT
ASCRP002340	0.472558	0.257	1.18873	-5.65626	0.335095	hsa_circRNA_102003	TTTCATGGCCTCCAGTGGAGTCTCCACCACCATCGACCCCTTCTGG
ASCRP002811	0.472558	0.257	1.18854	-5.65648	0.143543	hsa_circRNA_102494	CCTCTGTCAGCTTTCTGTATGAGCCCAATAGCCAAGGGTACAAGTA
ASCRP003460	0.47387	0.258	1.18626	-5.65902	0.153167	hsa_circRNA_103159	CTGTGGAAAGGGACTTCTCCACGGCATTCTTTAACAGCATCCCCCT
ASCRP005311	0.474886	0.259	1.18293	-5.66272	0.265274	hsa_circRNA_400015	CCACAGTGTGCCTGCAACTTTCCTGCCCTCCTAGGGACAGAGTCCA
ASCRP005351	0.474886	0.259	1.18261	-5.66308	0.116116	hsa_circRNA_400057	TTGGGATGTTCCCTAGCCTCAGACTGGCCAGAGAGGCCCCATTGTG
ASCRP000797	0.474886	0.259	1.18211	-5.66364	0.128475	hsa_circRNA_100414	ATGACCAGTGGACATGAAAGATCAGATGTCAACTTCATCTGTGCAG
ASCRP004176	0.474886	0.259	1.18186	-5.66392	0.170025	hsa_circRNA_103896	ATCAGAAGAAATGAGTCATCACCAGTGTTATCGCCAAGGAAGCCTT
ASCRP004123	0.474886	0.259	-1.18177	-5.66401	-0.159973	hsa_circRNA_103833	CAAAAAAGTCAGGCAATGAATCGCTCCCTGGCTAATGTGATTCTTG
ASCRP003371	0.474886	0.259	1.18176	-5.66402	0.37179	hsa_circRNA_103067	GCTGCCCACGTTTGATGGTGACAGTGCCTACGTGGGGATGAGTGAC
ASCRP001446	0.474886	0.259	-1.18166	-5.66414	-0.316536	hsa_circRNA_101078	CCATCCACAGGGCATCCGTTTCCGAGGCTTTAGTATCCCTGAATGC
ASCRP004519	0.474886	0.259	-1.18157	-5.66423	-0.213695	hsa_circRNA_104248	AGGGCTGAAAGGTGCTGTTTGGCACGGCCGATGGGCAGGTGATTGT
ASCRP004698	0.47497	0.26	-1.18041	-5.66552	-0.177069	hsa_circRNA_104442	AGGAGGTGCTGACGGACAACAACCTCGAAAGCACTCCAAAGACCTC
ASCRP003246	0.47497	0.26	1.18001	-5.66597	0.242776	hsa_circRNA_102939	AAATTAGCAATGAATGGTAGTGTCTAGAAAGGGTATGTCCCTTCAA
ASCRP000752	0.47497	0.26	-1.17987	-5.66612	-0.125689	hsa_circRNA_100367	GCCCAGCGTCTCCTTCAGTGAATCTACAGACCTATTTTCTCAGGAG
ASCRP005014	0.47497	0.26	-1.17984	-5.66616	-0.459457	hsa_circRNA_104764	CTGGACTGAAGATAACTGGCATCAAATACTCACAACATAGCTCAGG
ASCRP001312	0.476705	0.261	1.17696	-5.66935	0.225488	hsa_circRNA_100939	TGCTTCGGCAGGTCCTCTTCCTGATGGATGGGAACAAGCCATGACT
ASCRP002608	0.47704	0.262	1.17608	-5.67032	0.14057	hsa_circRNA_102289	CTGATAGCACCCCAAGATTGCTATGCTATGCCTTGTATGACTAAGA
ASCRP004297	0.477386	0.262	-1.17518	-5.67131	-0.21437	hsa_circRNA_104022	GAAGATACAGTCTTCCCAAGGGATTGTTGAAGAAACTTCTGAAGAG
ASCRP002653	0.478548	0.263	-1.17313	-5.67358	-0.274078	hsa_circRNA_102334	ATATGACCAGCCACCCACACAGAATATGCCTATGGGTCCTGGAGGG
ASCRP004687	0.479283	0.263	-1.17168	-5.67518	-0.174701	hsa_circRNA_104431	CAGATAGTGGATATGTTGGGAAAACGGATTCGATAACCATTAGCGT
ASCRP003809	0.479546	0.264	-1.17069	-5.67627	-0.154371	hsa_circRNA_103511	AGCTCAGCAGGAAGCCAGTTGAGGGAAGTTCTCCATGAATGTACGT
ASCRP000564	0.479546	0.264	-1.1705	-5.67648	-0.17534	hsa_circRNA_100175	AAATATTGAATTTCTGCCACTGCCTTCTACAAAGCACAACCTGTAA
ASCRP002347	0.480204	0.264	-1.16916	-5.67795	-0.239715	hsa_circRNA_102011	TGCAGGATGTTGGTCTTTGATCCACCATCTCTTCCTGTACTCTATA
ASCRP000077	0.480707	0.265	1.16805	-5.67918	0.134219	hsa_circRNA_000617	TGAGGTCTTGGCAGGTGTCAGAGAAATCTACAAGCAGATAAAACAG
ASCRP003325	0.481412	0.265	1.16625	-5.68116	0.190926	hsa_circRNA_103019	GTTCCAAATGCAGTTCTCAGCCCTGACAGAGGTGCTTTTCCACTTC
ASCRP001771	0.481412	0.266	1.16586	-5.68159	0.630777	hsa_circRNA_101412	CTTTGTCTAGCCCCAGTGCAGTGAAACCAGCAGTGTGTGTAGCAGC
ASCRP004574	0.481412	0.266	1.16584	-5.68161	0.890852	hsa_circRNA_104310	TTATGGACACGGTCTTTCTTATTCAGGTGTGTGTAACTGGTGTGTG
ASCRP003475	0.481541	0.266	1.16525	-5.68225	0.534082	hsa_circRNA_103176	AATTTTGCCGATTTCATGACTAACCAGTGACCTGCTGAAGCTCACA
ASCRP000870	0.482329	0.266	-1.16351	-5.68416	-0.308245	hsa_circRNA_100487	TCAGTGCAGTGAAGGGACACAACCAAATCATAACATATAGCAGACC
ASCRP004466	0.482329	0.267	1.16334	-5.68436	0.768172	hsa_circRNA_104193	GATTTCCATGTTGCAGATAATAATGAAGATGTTGATGGTGATGGTG
ASCRP004616	0.482739	0.267	1.16236	-5.68543	0.184931	hsa_circRNA_104354	TGGGATGATGTTGAAGATTCCTGTCTCTGGATCCAAATCAGAGGGC
ASCRP000813	0.482952	0.267	1.16133	-5.68655	0.100289	hsa_circRNA_100430	TATCAACAGTGCTTATACCTCCAAGATTCTGGTCTGCTCATGTCTG
ASCRP002592	0.482952	0.267	-1.16087	-5.68706	-0.210134	hsa_circRNA_102264	TCAGCGCCACGCAAGGGCACTTTCCCTCATGGTATTGATATTTTGA
ASCRP004196	0.482952	0.268	1.16085	-5.68708	0.146795	hsa_circRNA_103916	CTCGCTGCTTTTGTGTTTCAGACCCAAAGTTTACGCCTATCAGACC
ASCRP002848	0.483913	0.268	1.15909	-5.68901	0.401736	hsa_circRNA_102535	CCACTGTGAGGCATTTGCATCAAGTGTGGGCTTGGCATCTACGGAG
ASCRP000256	0.484573	0.269	1.15776	-5.69046	0.459372	hsa_circRNA_001363	TATATCATGAAGAGGTGGCTTGGAGTCTTGCTGGGAAGTGATAAAG
ASCRP005183	0.484704	0.269	-1.15717	-5.6911	-0.167974	hsa_circRNA_104936	TACGGCACAGGCCATTGAGAAACTAGTCGCTCTTCTCAACACGCTG
ASCRP003651	0.48481	0.269	1.15662	-5.6917	0.116371	hsa_circRNA_103353	ACAGAAGCTGGGGAAACTGACTCTACTCTGTGATGCCAAGACAGAT
ASCRP002350	0.484883	0.269	1.15612	-5.69225	0.176303	hsa_circRNA_102014	TCTGCTTCACGTGTAACAGTAACCCTCCACTGAGTGAAGAAATGTT
ASCRP003146	0.485427	0.27	1.1546	-5.69391	0.858465	hsa_circRNA_102838	GAAGAAGAAGGTAACGGCGACTGTGACTGTGGTGAATGTGTGTGCA
ASCRP005376	0.485427	0.27	-1.15392	-5.69465	-0.197033	hsa_circRNA_400082	ACACACTCGTGCACTCATGGACAGCTGTCCTTCACATTCAAGCACT
ASCRP004828	0.485427	0.27	-1.1538	-5.69478	-0.459281	hsa_circRNA_104575	AAGCGATGAGGGCGGTGGCCAGTTTGAATACTCCCTTCATACCAGC
ASCRP002298	0.485427	0.27	1.15365	-5.69495	0.653191	hsa_circRNA_101958	GTTGATGCTGCGTGAAGGTGGTGTTTTTAAGGCTCATCTTACTTTC
ASCRP000631	0.485427	0.27	-1.15335	-5.69527	-0.161793	hsa_circRNA_100243	ACAAAATTGGACTACTGCTTGCTGCAAAGGGGCATAAGGAAATGGT
ASCRP002853	0.486546	0.271	-1.15123	-5.69758	-0.146131	hsa_circRNA_102540	AAGCCATCCCCAGAAAGGGGTTGGCCGGAGACCTACGACATGAATA
ASCRP002293	0.486546	0.271	1.15081	-5.69804	0.190493	hsa_circRNA_101952	AGTCAGCTCTGCCTTTGCCCAGTTTGATGCTGAGGGTGATGGGACA
ASCRP001333	0.486546	0.272	-1.15057	-5.69829	-0.342956	hsa_circRNA_100961	AACAGAGAATTCTAAGCAGCACAACATCACAGACTTCCTCGTTCTG
ASCRP004776	0.487564	0.273	1.14811	-5.70096	0.20365	hsa_circRNA_104522	CTTGTGTATTCTGTTACATCAATCAAAAGGGAAATCCTCATTGACG
ASCRP000316	0.487564	0.273	-1.14808	-5.701	-0.135406	hsa_circRNA_001679	AAGGATTTGAACCCAGGTCGGCAGGAGACCAGCTGCTCTAGAAGAG
ASCRP000260	0.487564	0.273	-1.14794	-5.70115	-0.156434	hsa_circRNA_001380	AATTGAAAGCTAAGGAGGGGCTCAGTGGTTGCAGGTTGTGAGGTAT
ASCRP000453	0.489633	0.274	-1.14464	-5.70473	-0.201646	hsa_circRNA_100063	ATTGGTTCTGGAGGATTTGGTGATGTCGCGGGCAGGCTCTGGATCT
ASCRP004211	0.490699	0.275	1.14274	-5.70678	0.280414	hsa_circRNA_103931	TGTGAAAGAGTTCAGCAGTGCAGTGTGAGATGCATGAATGGTGGGA
ASCRP003935	0.490858	0.275	1.14212	-5.70745	0.136749	hsa_circRNA_103641	CACAGTATGGTGCTAATCCTCCATCTGGAATTGAAGATGAAACTGC
ASCRP003075	0.491222	0.275	1.14121	-5.70843	0.12385	hsa_circRNA_102764	CCTGCTGTAGACGTCCTTCTATGGCCGCTTCAGGCACTTCTTGGAT
ASCRP004074	0.49152	0.276	-1.14039	-5.70931	-0.126045	hsa_circRNA_103784	CCTGCTGCCAGACTACATGAGGAAATAATTGACTTTTATAACTTCA
ASCRP003814	0.492411	0.276	-1.13854	-5.71131	-0.322884	hsa_circRNA_103516	GTGGGATGAGAAATTATACCATTTTATGGAATGTCAACCTACATCA
ASCRP002042	0.492411	0.276	-1.13835	-5.71152	-0.581962	hsa_circRNA_101695	AGAACTCTCCTTTTTCACCAGCCAGGACAACATGTGGCGCTGTCCC
ASCRP004230	0.492846	0.277	1.13701	-5.71297	0.187642	hsa_circRNA_103950	CAGCTTCTATGGATCTCCATCCACCAAGCGAAGGGGTCAGATGTTA
ASCRP004775	0.492846	0.277	1.13688	-5.7131	0.150668	hsa_circRNA_104521	CTGCCCAGAGACTTCCTGCTGTGCGCCAGCAGCTCTGGTGCTGTGC
ASCRP001741	0.492846	0.277	1.13655	-5.71346	0.515556	hsa_circRNA_101382	AAGATGCAGTCAGTGGAGTGATCCTGGTGGAGGGATTGAAATGTCT
ASCRP003221	0.492938	0.277	-1.13602	-5.71403	-1.07104	hsa_circRNA_102913	TTAGCCTTGAAGCCTTATTTAGTGTCTCTGACAAAACCGGCCTTGT
ASCRP000088	0.493128	0.278	1.13535	-5.71474	0.366783	hsa_circRNA_000644	GGTCTCACGGGTGAGGATGGGCAGGTGAGTGCAGGTGAGGATGGAC
ASCRP002658	0.493877	0.278	-1.13391	-5.71629	-0.121783	hsa_circRNA_102339	CCTTATATGCCCAACACATATCTCTTTATGGTACAAGCTCGAGGTA
ASCRP003642	0.493909	0.278	-1.13347	-5.71677	-0.157898	hsa_circRNA_103344	GAAGGATTCAGAACACCTTTGTCCTAGAATATTGTGGAGAGGTACT
ASCRP003306	0.494084	0.279	-1.13226	-5.71806	-0.153843	hsa_circRNA_103000	TGTTTTCCTGGAATATGATCAGGATATTCCACCTGCTCCTACGAAG
ASCRP001643	0.494084	0.279	1.13163	-5.71874	0.784815	hsa_circRNA_101282	AAACAGCAAAACAGACATTGCTACAAGTGGTTGGTGTGGTCTCTGT
ASCRP000810	0.494084	0.279	1.13132	-5.71907	0.176902	hsa_circRNA_100427	ATCATTCCAGGCGTTGACCCGGACGACACCTATAATGAGACCCCCT
ASCRP001986	0.494084	0.279	1.1313	-5.7191	0.238093	hsa_circRNA_101637	TGACCAAAGACTTTTAGGTTTGTTTGAATAAGAGATCTGACCTGAC
ASCRP003759	0.494084	0.279	1.13124	-5.71917	0.168111	hsa_circRNA_103461	AATAAGACAGAGGGCCCTCATCTTTGTGTCCCATGGAGCCGGAGAG
ASCRP001568	0.494689	0.28	1.13	-5.7205	0.410752	hsa_circRNA_101205	TTCCGCTGGGGGTGTGCTGGACCGGTTTTCTCAAATTCAGCCAAAG
ASCRP001192	0.495141	0.28	1.12884	-5.72174	0.128213	hsa_circRNA_100818	TTATGACAAGGATTATATTCAACTGCTACATCCCTGGTGTCAAGTC
ASCRP002075	0.495141	0.28	-1.12857	-5.72202	-0.270032	hsa_circRNA_101728	TGAAAATCGAGGATGTCCTGGGCTGCAATGTCTCACCAGTGCCTGG
ASCRP003746	0.496684	0.281	1.12602	-5.72474	0.373729	hsa_circRNA_103448	GGCTGAAGAAGTGCTGGCCGGGATGAATGTCTACTCCTCTGAATTT
ASCRP003754	0.498662	0.283	1.12288	-5.7281	0.292812	hsa_circRNA_103456	AAAGGTGTGGTTAACGTCCTCCCAGGATCTGGCTGGTGGAGGAAGT
ASCRP000090	0.499503	0.283	-1.12127	-5.72982	-0.1148	hsa_circRNA_000651	GCAGCAGCAGGATGGGACCCGGAGACCCAGATCAGGAACTGGACCT
ASCRP000530	0.499503	0.284	-1.12092	-5.73019	-0.157611	hsa_circRNA_100140	TTATAAGACAGATTGGCCATTTGATGATGGAGCTCCACCCCCTAAT
ASCRP002257	0.499958	0.284	-1.11989	-5.73128	-0.26288	hsa_circRNA_101915	TGTCATCAGCTGGGGACATTACTGAGGTGCACATTCTCCACCCACC
ASCRP002632	0.500116	0.284	-1.11928	-5.73193	-0.34184	hsa_circRNA_102313	ATATCCAATGGGTTCAGCTCCCCAACAGCATAGTATTCTCAGTAAC
ASCRP001982	0.500714	0.285	-1.11805	-5.73323	-0.106551	hsa_circRNA_101633	AAACATGGAGAGGTAATCAATATTATCAATGCTGCCCAGGAAAGTA
ASCRP004113	0.50072	0.285	1.11765	-5.73366	0.559708	hsa_circRNA_103823	GCCATTATCTGTGAACTAGAACCTTCTGATAACTTAAGAGAGATTC
ASCRP004367	0.502622	0.286	1.11462	-5.73687	0.105512	hsa_circRNA_104094	CCTATTTGCTTGGTTCACTAAGAATCTTTCCCCAGACAAAATCAAC
ASCRP005093	0.504438	0.287	-1.11172	-5.73994	-0.140891	hsa_circRNA_104846	TAAGAAAGAGGCAGTTTTTCACAGTTTATTGGTTATTCCTGCCCGA
ASCRP005045	0.504687	0.288	-1.11088	-5.74084	-0.145912	hsa_circRNA_104796	AGAGACTCCATCAAGCACCAGCAACAAGTGGTGCAGGCTGTGGAAC
ASCRP003118	0.504687	0.288	1.11059	-5.74114	0.14482	hsa_circRNA_102809	ACAAGTAGCATGACAAAAATGCTGAGTTTCTTCCGTAGAACACTAG
ASCRP003976	0.505387	0.288	-1.10923	-5.74258	-0.262261	hsa_circRNA_103682	CATTTTCCAGCAGGATGAAGTTAAAGGAAGTAGATCGTACAGCCAT
ASCRP000624	0.505876	0.289	-1.10816	-5.74371	-0.153251	hsa_circRNA_100236	TTTTAAGATGCCTCTCTCTCTTATGTCCCTGATGCCAAAAATGCAC
ASCRP005072	0.506745	0.29	1.10591	-5.74608	0.141955	hsa_circRNA_104823	TTTCCAGCATTCACAGGAAATCACATTCTGCCTGATGAAGATCTGG
ASCRP001318	0.506745	0.29	1.10578	-5.74621	0.165044	hsa_circRNA_100946	TTTTTGTTGGACTCTTTCTGTTTGGCTATAAGCCCTGCTGTTCGTG
ASCRP004928	0.506745	0.29	1.10577	-5.74622	0.19053	hsa_circRNA_104675	TGAATTGCTCAGCCTTGCCAGCAGTCCAATATCAGATGGAAATGAT
ASCRP005308	0.506745	0.29	1.10538	-5.74663	0.333145	hsa_circRNA_400012	AAGTTTTTTGTAGAGAAACCTCCACCTCCCAAGCTCAAGCAATTCT
ASCRP002499	0.50689	0.29	1.10478	-5.74726	0.13238	hsa_circRNA_102167	TAAATTCTACTGGAGAGCATACGGAATTTTCTGGGGTGCTCCTTGT
ASCRP001737	0.507847	0.291	-1.10308	-5.74905	-0.245585	hsa_circRNA_101378	TCTTTCCATCATAGCAGTGTGCCCCCTACCACCGGAGCCAGAGAAT
ASCRP000743	0.510432	0.293	-1.09879	-5.75355	-0.165926	hsa_circRNA_100358	GAAGAAGGAGAATGGAACAAAAGTGGGACTTTTAAAATGTTGCCCT
ASCRP002998	0.510432	0.293	1.09875	-5.7536	0.261006	hsa_circRNA_102686	GTGTTGTCCCTACTGCATAGAAGAGAAGCCAGATTGCTCCAAGGCC
ASCRP001156	0.510486	0.293	1.09827	-5.75409	0.301222	hsa_circRNA_100782	ATATCTACAATCTCGGTACTACAGGTATGGCCTCACAAGTCTTGGT
ASCRP002562	0.510666	0.293	-1.09737	-5.75503	-0.249324	hsa_circRNA_102234	CACAGATCAGGTTTCAGAGGAGCGTGCTCGACCTTTCTCTCCAGTG
ASCRP001820	0.510666	0.293	-1.09724	-5.75517	-0.277588	hsa_circRNA_101469	AGACCTGCTGGAAGGTGGCAGTGACGAAAGAAGAGACTCTCCCGGC
ASCRP001832	0.510944	0.294	-1.09598	-5.75649	-0.106542	hsa_circRNA_101481	TGAGCGAGAAGAAGTCATATGCCCTAGATGTTACACAACAGCCAAT
ASCRP003390	0.510944	0.294	-1.09584	-5.75664	-0.183595	hsa_circRNA_103086	GTTTTCCAACATCATCCCCATTAGGTGCTGCGAGTGGCTGAGATGC
ASCRP004335	0.510944	0.294	1.09567	-5.75681	0.205293	hsa_circRNA_104061	AACAAAAAAATGTTGAAGCCAAATTTGTATCCTACTGTGGGGCTTC
ASCRP001254	0.511179	0.295	-1.09391	-5.75865	-0.183294	hsa_circRNA_100881	GCATCTTCAGCCTGCCCACTAAGGAGGAGGAGTCATTGCTGCCATC
ASCRP002244	0.511179	0.295	1.09365	-5.75892	0.229668	hsa_circRNA_101902	GGACGGTCAGCGTCGTCCCCCAGACTACAGTAATACTCAACAATGA
ASCRP004219	0.511179	0.295	-1.09356	-5.75902	-0.205601	hsa_circRNA_103939	TTCGATTCATCCTTCTCACCTAACACTGGGAATTTACAAGCTCAGG
ASCRP000788	0.511179	0.295	1.09332	-5.75926	0.197044	hsa_circRNA_100404	CTAATTTCTTGGCCCCATCTGCTTTGATATGATTGAAGAAGCATAC
ASCRP005152	0.511179	0.295	1.09325	-5.75934	0.159742	hsa_circRNA_104905	GAAATGGAGAGCTTACAAAACACTACACAGCAAAATAATGATCTGC
ASCRP002191	0.511179	0.295	1.09262	-5.76	0.158089	hsa_circRNA_101848	TGTAGCTGACTTTTTCCCAGGTCATGAGTCTCGGGCTACAGAAGCT
ASCRP003609	0.511179	0.295	1.09259	-5.76003	0.102989	hsa_circRNA_103311	TTACCAACAGTCTAATATATGACTGCTGCTGCTCCTATGCAAGGGA
ASCRP001654	0.511278	0.296	-1.09194	-5.76071	-0.231228	hsa_circRNA_101294	GAAAATTCAAGGTGTTACACATAATATTGCATTACTTCGAGAGGTG
ASCRP000470	0.511278	0.296	-1.09167	-5.76099	-0.266901	hsa_circRNA_100080	CATCAAACAGTGAGAAAGATCAGTCTAAAGAAAAGGAGAAGAAAGT
ASCRP000717	0.51136	0.296	-1.09116	-5.76152	-0.195596	hsa_circRNA_100332	GTATTTAAGAAGATTCCCTAACCTCAACCAGAACCCTCGGACTTTG
ASCRP001088	0.511554	0.296	1.0903	-5.76241	0.222061	hsa_circRNA_100714	TGCATGACTGTTCACATTGCTTCCTGCCTGACACAGCTCACTTCAA
ASCRP005113	0.511554	0.296	-1.09006	-5.76266	-0.224678	hsa_circRNA_104866	TAATTTCACAGCCCCAGGTGGACGTCTGATTTATGAAGCTCCCCAT
ASCRP005393	0.511554	0.297	-1.08931	-5.76344	-0.378288	hsa_circRNA_400100	GGGCGGGCTCACATGGCTGGGTACGGAAAGGAGAGAGCAAACACTC
ASCRP002252	0.511554	0.297	-1.08926	-5.76349	-0.219952	hsa_circRNA_101910	AGCCTTTGCAGGAGGAGCTTCCCACCATCTACAAGTGTCCTTACCA
ASCRP000199	0.511554	0.297	-1.08848	-5.7643	-0.384951	hsa_circRNA_001096	CGCGGAGACCATGCCCACCACCACCCTGCCTGGAAAGGACCCAGCG
ASCRP003438	0.511554	0.297	1.08833	-5.76446	0.114761	hsa_circRNA_103135	CCCTGTGCAGCTACAGATTCTCGTTGACACTGGAAGCAGTAACTTT
ASCRP001092	0.511554	0.297	1.08808	-5.76472	0.165297	hsa_circRNA_100718	CCTTTTGGAGTGGCTGCTTTTTATAACTATGATGCCAGAGGAGCGG
ASCRP001547	0.511554	0.297	-1.08775	-5.76506	-0.286374	hsa_circRNA_101184	CACAGCAACGGAGGAAAACTCCCTCTTCGTCATGACCAACGTGATC
ASCRP003035	0.516451	0.3	-1.08068	-5.77239	-0.267015	hsa_circRNA_102723	ATACCTGCGTAGACATAGATGAATGTACCATCCCTCCATATTGCCA
ASCRP002528	0.518085	0.302	-1.07759	-5.77558	-0.122428	hsa_circRNA_102200	CGTAGACGAGTGATGATGGCCAAAGAGAAGCCACCGATAACTGTAG
ASCRP004591	0.518085	0.302	-1.07755	-5.77561	-0.165821	hsa_circRNA_104328	CTGTGTCAAATTTGTTCAAGGTTGAAGGTTTAGAACAGATGTGGAA
ASCRP004318	0.518085	0.302	1.07728	-5.77589	0.633198	hsa_circRNA_104044	AACTGAAGTGGCTATGTGGTTGATGTTGCAGAATGATGAGCCGGAG
ASCRP000998	0.518132	0.302	1.07683	-5.77636	0.091716	hsa_circRNA_100624	ATATCACACAAAGCTTTGGAGTTTAGCCTTTCTGCCAATCCAGAGG
ASCRP004735	0.519389	0.303	-1.0744	-5.77886	-0.205898	hsa_circRNA_104481	AATTCCAGTCTCTGTGGACAAAATGACCCAGTAGAACTTCATGGAG
ASCRP005254	0.519389	0.303	-1.07364	-5.77964	-0.125645	hsa_circRNA_105007	AAGTATAATGGGCCAAAACACTCATTGACTCAGATCTCTCAATCCA
ASCRP001954	0.519389	0.304	1.07325	-5.78004	0.208833	hsa_circRNA_101605	TTATATGACTTGGCAGATCAACTACATGCTGCAGGTGGCACAAGAT
ASCRP003665	0.519389	0.304	1.0728	-5.78051	0.103136	hsa_circRNA_103367	TCAAACGACATCAGTATGTTCATGCGGATGCTCCTACCAATAAAAC
ASCRP002913	0.519389	0.304	1.07241	-5.7809	0.619481	hsa_circRNA_102600	AACTGGCCCGGAAACAGGAGGACGTGTGGATGTGGAAGCAGCCAAG
ASCRP003604	0.519389	0.304	-1.07238	-5.78093	-0.1485	hsa_circRNA_103306	AGCAACCAAAAGCCAGGTGATCTTTAGACAGTGACTGAGTATGGAT
ASCRP000064	0.519389	0.304	-1.07223	-5.78108	-0.464266	hsa_circRNA_000554	ACTCCATCTATCCATATGAGAGTTGGATTCTCACTCTGTTGTCCAC
ASCRP002545	0.519389	0.304	1.07198	-5.78134	0.505723	hsa_circRNA_102217	AACTCCCTCATCGGAGCTGGTGGTGGCTCTGAGTCATCTTGTGGTT
ASCRP000501	0.520605	0.305	1.06995	-5.78343	0.109293	hsa_circRNA_100111	CTTTGTGCAGGTCCTGTATCACCTCTTTGAGGAGTTTGCCAACTAC
ASCRP002746	0.520717	0.305	-1.0694	-5.78399	-0.143239	hsa_circRNA_102427	TGACTACGGCAAAGTGGCCACTCAGGTACGCCATCCCACCAGAGCA
ASCRP000639	0.520971	0.306	-1.06867	-5.78474	-0.161394	hsa_circRNA_100251	CAGGATACTCATTCTTACCTGACCCTCGATGAACCAATGAATAACA
ASCRP001267	0.521843	0.306	-1.0671	-5.78635	-0.149974	hsa_circRNA_100894	GTGGAAGCACATGAAGAATCAAAAGAACCTGTTGCTGATGAAGAAG
ASCRP000917	0.523174	0.307	1.0648	-5.78869	0.204198	hsa_circRNA_100537	CCTGGCATCTAGAATGTATCCTGTCAGGTATAATGTCAGTGAATGG
ASCRP004489	0.523174	0.307	-1.06452	-5.78898	-0.129871	hsa_circRNA_104216	ACAAATGAAGGTGACCATCCACGGCAAGATAGCATGGATTTCAGTA
ASCRP003454	0.524552	0.308	-1.06226	-5.79128	-0.168941	hsa_circRNA_103153	ACATGATCGCCCAGAAGTGAAAAGCAGGAAGAAAATTCCTTGGCAT
ASCRP005037	0.524552	0.308	1.06187	-5.79167	0.14422	hsa_circRNA_104787	GGTGTCATAGAATTGATAGATGTCACATGTACCCTGCTGCTTCTAA
ASCRP001255	0.526482	0.31	1.05889	-5.79471	0.619849	hsa_circRNA_100882	GACCCCAAAGTGCCGGATGGAGTGCTGTGATGTGCCAGCCGAGACA
ASCRP003753	0.527372	0.311	1.057	-5.79662	0.17422	hsa_circRNA_103455	TTAATGTCCCTGATAGAGGGAGGAATCAGCAGCTTGGAAATTCAAG
ASCRP005243	0.527372	0.311	1.05691	-5.79672	0.138271	hsa_circRNA_104996	ACATCAGAGCTGTTCAGAGTTCTTGGAGTCTCTGCGGAGTCCCTGG
ASCRP000380	0.527382	0.311	-1.05626	-5.79737	-0.214372	hsa_circRNA_002106	GCTGGACCATTCATCCTTGAGAACATCAGTTACTTTTATATGAAGA
ASCRP003318	0.527382	0.311	1.05611	-5.79753	0.173738	hsa_circRNA_103012	AAGCATGCTCAGTGGTGTTTCCCCAGGATCTGCTGGAGAAAGGCCT
ASCRP001176	0.527953	0.312	1.05476	-5.79889	0.568422	hsa_circRNA_100802	AAGGACCAGGGAGTGTGAGGAAGAGGCTGTCTGTGTCATTATGTGT
ASCRP001182	0.527953	0.312	-1.05432	-5.79934	-0.142639	hsa_circRNA_100808	TTGAGGACTTTGAGAGGCTGCTGGAATCTTCCCTCATTTCATTATC
ASCRP004027	0.527953	0.312	-1.05417	-5.79949	-0.252625	hsa_circRNA_103736	TGAACACTGGAAATTCGGTTCCCTCAAAATTATAAAGGCAGGAAAG
ASCRP001471	0.528616	0.313	1.05258	-5.8011	0.215153	hsa_circRNA_101103	TCTTCTATGTTTCCACATCGGTCAGAAAAAGATAGGGAGACGTGGT
ASCRP004270	0.528616	0.313	-1.05231	-5.80138	-0.152835	hsa_circRNA_103990	TGCTCCTGAGATTTTATGGAAAGAACTCTTCTTATGTCCATGGGGG
ASCRP002638	0.528616	0.313	1.05211	-5.80157	0.128505	hsa_circRNA_102319	TATCCAAGTGGCAATAGTCTGATCTGAAATGTGTCCAGGATGCCAA
ASCRP001189	0.528823	0.313	1.05109	-5.80261	0.201131	hsa_circRNA_100815	ACTGGCAGGAGGCGGTCTATGCTTGCTTGGTGCTTATGCTGACAGT
ASCRP001283	0.528823	0.313	-1.05078	-5.80292	-0.157429	hsa_circRNA_100910	CCCTGTATCAGGAGCACAGGCCCCTAGCAGTCTTCTTGATGCTTTG
ASCRP004028	0.528823	0.313	-1.05066	-5.80304	-0.232144	hsa_circRNA_103737	AAGCGTCAAATAATTCGGTTCCCTCAAAATTATAAAGGCAGGAAAG
ASCRP001556	0.528863	0.314	1.04996	-5.80375	0.148719	hsa_circRNA_101193	CTCGATTCAGGAATGGAGGATCTTTGGTTCCATACCAATGCAGGCA
ASCRP000075	0.528863	0.314	-1.04948	-5.80423	-0.310833	hsa_circRNA_000598	CACCCTGGAGCCCAGCCCCCTGGCCCAGGGTCCCTTCCCTGTCACT
ASCRP004387	0.528863	0.314	1.04944	-5.80427	0.213323	hsa_circRNA_104114	TTTCTTGATGCTGGTTCTGTGAATTGCGCAAGCAAACTGTCGAGTA
ASCRP002228	0.528961	0.314	-1.04854	-5.80517	-0.29685	hsa_circRNA_101886	TGTACATGTGGGATTCCATTGACCAGTGGACTGCTGGGACGGGCCC
ASCRP004301	0.528961	0.314	1.04853	-5.80519	0.128061	hsa_circRNA_104026	AATGATGACTCGTCAAAAGAGATTCCAGGCTCAGAGTGCTATGAAG
ASCRP001095	0.529694	0.315	-1.04716	-5.80657	-0.171766	hsa_circRNA_100721	ACCTCTTCACACAGCATGCTTTTTATAACTATGATGCCAGAGGAGC
ASCRP004714	0.529935	0.315	1.04645	-5.80729	0.224582	hsa_circRNA_104460	TCCTATGATAATTGCTTCTATCTTTGCTTTTGCCACCTGTGGAGGT
ASCRP000598	0.530138	0.316	-1.04564	-5.8081	-0.123448	hsa_circRNA_100209	GAGATCAACACCTTGTCTCTTCCACCAAAGCCACCTAAGCCAATGA
ASCRP003427	0.530138	0.316	1.04511	-5.80863	0.135385	hsa_circRNA_103123	CAGATGCAGGGGAAAAGCTTCACTCTGACCATCACTGTCTTCACAA
ASCRP001941	0.530138	0.316	1.04428	-5.80946	0.384103	hsa_circRNA_101591	TTTATGCAGAAGAGGGAATGGTGGTTTGGCCTGGAGTGATGATGCA
ASCRP000580	0.530138	0.316	-1.04425	-5.80949	-0.144184	hsa_circRNA_100191	ACAGTGAAAGTGCGCCGCGTGGCTCCTCGTTTCTCCATCCCTCCCA
ASCRP001209	0.530138	0.316	1.04423	-5.80951	0.120386	hsa_circRNA_100835	CTGGGCTCAGGTGATGCTGCATTACCGCTCAGACCTGCTCCAGATG
ASCRP005128	0.530326	0.317	1.04334	-5.8104	0.298379	hsa_circRNA_104881	GGCACCTACCTTGCGAGGCTGGCAGGATGTACAGTTTTTATCACAG
ASCRP003218	0.530326	0.317	1.0432	-5.81054	0.464333	hsa_circRNA_102910	CAGAAATGCTGTTACTAACATTCTGAGAGAGCCTGTGTGTTTAGGA
ASCRP000832	0.530596	0.317	-1.04245	-5.8113	-0.154606	hsa_circRNA_100449	TGATTGACAAGGCTTCTCCAGTGACAGTGATCTGGTATCTCTTACT
ASCRP002025	0.531223	0.318	1.04122	-5.81253	0.168515	hsa_circRNA_101678	ACCACCACTGGTCCAGCCCTGCTGGGAGTTTTCTGCCACACAGATT
ASCRP004151	0.532192	0.318	1.0395	-5.81426	0.222628	hsa_circRNA_103863	TAATGGTGAATGGAATAATTGTGTGCCCAAGAAGATGCTGCAGCTG
ASCRP002083	0.532192	0.319	-1.03915	-5.8146	-0.124211	hsa_circRNA_101737	CTGCCTTACAAGCACAAAAGAGAAGAGAAAATTGCAATCATGAGGG
ASCRP000830	0.532614	0.319	-1.0382	-5.81555	-0.196817	hsa_circRNA_100447	GAGAGAAGTCCCTTCAATACCCCAGGTCCCAAACTACAGGCTGTCG
ASCRP003565	0.533095	0.319	-1.03717	-5.81659	-0.237699	hsa_circRNA_103267	GAAGGTCCGCTTCAAGTAAAGAGATTATAAATCTTCCACTGAATGA
ASCRP004523	0.533707	0.32	-1.03596	-5.81779	-0.129666	hsa_circRNA_104252	GAACTTCACAGACCTAAAGTGATCCAGACTTCTGCGGCTAATTTTT
ASCRP003255	0.534445	0.321	-1.03459	-5.81916	-0.116278	hsa_circRNA_102948	AAGCTCTATGCTGAAGCCCATTATCTCTGACCCTGAGTACCTGCTA
ASCRP005098	0.535283	0.321	-1.03308	-5.82066	-0.218298	hsa_circRNA_104851	CGAGTGCACTTGGTGAAAGCACTGAAAGAGAAGATTGAATCTGAAA
ASCRP001641	0.535516	0.322	-1.03228	-5.82145	-0.199347	hsa_circRNA_101280	CAATCTTGTAGTTATACATTGGCTCTTCAAAGACGTTCACCTCATC
ASCRP002524	0.535516	0.322	-1.03199	-5.82174	-0.151267	hsa_circRNA_102196	ACTGGCTGCTATCCCAAAGAGAAGATTGATATTGGGCTGCCTCCAC
ASCRP000045	0.536392	0.322	-1.03044	-5.82328	-0.211114	hsa_circRNA_000424	TGTAGGGGAGAGCATACCTGTAGAATTGGGCAGTAAGGCCGTGGAA
ASCRP001358	0.537108	0.323	1.02908	-5.82464	0.370688	hsa_circRNA_100987	AGGACCAGTCGTGATATGGAATGTGCAGATGTCCCACTATTAACTC
ASCRP000961	0.537108	0.323	1.02871	-5.825	0.394445	hsa_circRNA_100583	ACAGATAAGGGTTTAAATGTGATACTGGTGTAGATCTCCTTGTTCT
ASCRP004277	0.537391	0.324	-1.02757	-5.82613	-0.435153	hsa_circRNA_103997	AGGCAGATTCATTTATACAGCTACTCCCTGTATCAAAGCCATCAGC
ASCRP003171	0.537391	0.324	-1.02734	-5.82636	-0.195878	hsa_circRNA_102863	ATTTCCTTCGCAGGCTCACCAGGTCCACCAGCATTACAAGCTAGGA
ASCRP000617	0.537391	0.324	1.02717	-5.82652	0.169717	hsa_circRNA_100229	AATGGATCTTACTAAGTTCTTCTGGATCTGCCTCAGTCCTGACACA
ASCRP000089	0.537874	0.324	1.02599	-5.8277	0.153741	hsa_circRNA_000645	AAGTCAAGGTTGCCCCCAGGCGGTCCTTCCTGGCCATCTATCTGCT
ASCRP004604	0.537874	0.325	-1.02576	-5.82792	-0.152458	hsa_circRNA_104341	TTTATATACACATGTGTACCTGTGTAATGTGGACACCACCTCTCCG
ASCRP005346	0.537953	0.325	-1.02506	-5.82861	-0.20713	hsa_circRNA_400051	TTTAACTTCCCTAGTCTGGTTGACCAAGTCTCCATCTCATTTAACA
ASCRP003647	0.537953	0.325	-1.02488	-5.82879	-0.111539	hsa_circRNA_103349	TCTTCCAGCACTACCATGCCAATATGTGGGTGCCCCGGTGGCTTAT
ASCRP001245	0.53814	0.325	1.02424	-5.82942	0.141037	hsa_circRNA_100872	CGTAAACTTCAAAAAAATTGCCACCTTCCAGAGAAGAGGTACGAGA
ASCRP003676	0.538185	0.325	1.02371	-5.82995	0.093504	hsa_circRNA_103378	CTCTGCAATGACTCTGAACAGGAAGTGCCTCCTGGAACCACAGAGT
ASCRP000498	0.538185	0.326	-1.02341	-5.83024	-0.256457	hsa_circRNA_100108	GAACCATAGCGTGCTTCAGACCTCTCACTCCTGCCTGGTGTTCCAA
ASCRP004752	0.539253	0.326	1.0216	-5.83202	0.211591	hsa_circRNA_104498	TCTCCTACAGATTTATTCAGGAGATTGAGCATGCTCTGGGTCTTGG
ASCRP000097	0.540217	0.327	-1.01994	-5.83367	-0.178585	hsa_circRNA_000679	AGAGGGGCAGGAGCAGGCAGGCGGCAGGCACAGGCACAGCCACAGA
ASCRP000610	0.541416	0.328	-1.01796	-5.83561	-0.196117	hsa_circRNA_100222	TTGCCAACTTCAGTGCTCCACAGACCCCTTTGCTTCTGTTTTTGGG
ASCRP001430	0.541854	0.329	-1.01699	-5.83656	-0.25061	hsa_circRNA_101062	AAGAGAAACTCCATGCCAAGAAAATGAAGCCACATCCATCCTGAAG
ASCRP002521	0.542185	0.329	1.01617	-5.83737	0.168959	hsa_circRNA_102193	GCTGATGAAGTACCTGGGGGACAGGGTGTCTGAGAAAGTGAAGACC
ASCRP003036	0.542741	0.33	-1.01485	-5.83866	-0.105299	hsa_circRNA_102724	GACACCTCAGACTTGTGTATGCGGATACCTGCTTCAGTACCATCAA
ASCRP003147	0.542741	0.33	-1.01462	-5.83889	-0.186957	hsa_circRNA_102839	ACTACCAAAGACCTGTCATTTACTCCATCCTTTATAGTGATGCTAC
ASCRP002362	0.542741	0.33	-1.01427	-5.83923	-0.087504	hsa_circRNA_102027	CAAACATCAAAAGAGCCAACACAGATCTATAGATTTCTTCGAACTC
ASCRP002873	0.542934	0.33	1.01363	-5.83986	0.129207	hsa_circRNA_102560	ATAAATTGCCTCATTCGTAACTTCCACAGCGCGGCACCTGTACCTC
ASCRP001431	0.54307	0.33	1.01307	-5.84041	0.151083	hsa_circRNA_101063	AGAAAATGAAGAATCCTAATGTACCTGGCTAGCTGGTGGTGAGTAG
ASCRP004072	0.543108	0.331	1.01263	-5.84084	0.202191	hsa_circRNA_103782	ATGAATGTCCCCTTTCCAGGTATCCTGAAGAACTTGCCTGGCACAC
ASCRP001403	0.543419	0.331	-1.01184	-5.84162	-0.208074	hsa_circRNA_101033	AGCACGAGTAGTAGTCTTAAGACGGAAAGAACACCCGGAAATGAAA
ASCRP002999	0.54408	0.332	-1.0102	-5.84322	-0.308953	hsa_circRNA_102687	TACTGCATAGAACCAACCATCATCACAGTTGATCCACCTGCATGTG
ASCRP000759	0.54408	0.332	1.01019	-5.84322	0.202869	hsa_circRNA_100374	TGTCGGTTCAGATATTCTGCTCTCTTTGCTGAACTCGGTTATTTCA
ASCRP000502	0.544375	0.332	1.00941	-5.84398	0.171949	hsa_circRNA_100112	CGTCACTGTGGTTTCCATGTGATCCCCACTATCTCAAGCATCGTCC
ASCRP003153	0.545106	0.333	-1.00801	-5.84535	-0.292947	hsa_circRNA_102845	GCGTGCAACATCTTAATTCTTACTTAGATCCATCCTTTTACAATCC
ASCRP000547	0.545106	0.333	1.00747	-5.84588	0.105441	hsa_circRNA_100158	TGTGAGCAATGCTGGCTTCGTCATTGACTATACAGCTCCCTGCGGG
ASCRP004493	0.545106	0.333	1.00729	-5.84605	0.103616	hsa_circRNA_104221	TTCCTGTGATGCCAGAAAAGGATGCGCCTCCACTTAGCAAGGCTGG
ASCRP002711	0.545499	0.333	1.00639	-5.84693	0.33669	hsa_circRNA_102392	CCCGGATGAGGGATTTGTCTTGGCTGTTACTATGACACGGGAAGCA
ASCRP005167	0.545989	0.334	-1.00536	-5.84793	-0.144028	hsa_circRNA_104920	GGAGACTCGGGTCACTGCTGAAACTCAAGAGAAAGAAGACGTTATC
ASCRP003864	0.547593	0.335	-1.00238	-5.85083	-0.115537	hsa_circRNA_103566	ACAGATAGCTTGGAAACACCAACTTACCCAACAGAAGCTGTTCTTC
ASCRP003489	0.547593	0.335	1.00211	-5.85109	0.216531	hsa_circRNA_103191	CAAAATTTATCACCTAAAGAGCCGTGTGGTTTTGCCATGTTCTGTT
ASCRP002854	0.547593	0.336	1.00179	-5.8514	0.133433	hsa_circRNA_102541	CACTGTCCAGGACACGTGGCACGCCCAGTGACTTCCCCAGGGCAGC
ASCRP000073	0.547593	0.336	1.0017	-5.85148	0.313054	hsa_circRNA_000593	AGAAATTGGAGGTGGCAATCAAGAGTGGTGTCATGGCAAACATGAT
ASCRP003245	0.548875	0.337	-0.999627	-5.85349	-0.346686	hsa_circRNA_102938	GCCCTCAAGGTGAACTTATGCCATGTTTACCAAAAGAAGGCATTTT
ASCRP004691	0.549386	0.337	-0.998306	-5.85477	-0.630345	hsa_circRNA_104435	CAGTCACGAGGAATAGTAAAGAAACACATCATAAAACCTCCCAGGA
ASCRP004744	0.549386	0.337	0.998186	-5.85489	0.12209	hsa_circRNA_104490	AGGCTGTAAATGGAACATTTTAGTGGACAAACCAAATGACCAATCT
ASCRP004107	0.549647	0.338	0.997457	-5.85559	0.150294	hsa_circRNA_103817	ACACATGCAGGCATCTTTCAACCTCATGTGCGACACCTCCTGGTTT
ASCRP003522	0.549957	0.338	0.996399	-5.85661	0.209582	hsa_circRNA_103224	TGGCCCAATCAATATGTAATGGATGTGTTGATGGATCAGCACTTTA
ASCRP002381	0.549957	0.338	0.996283	-5.85673	0.656026	hsa_circRNA_102046	CGTATATGAAAGAGGAAGTGGATAGAAACATGGTGGTGGCTTTGAA
ASCRP001174	0.550437	0.339	0.994899	-5.85806	0.162514	hsa_circRNA_100800	TAGCTCTGAGATCTCTCCAGCGAACACTGAATGAGTTAAAAGAGTA
ASCRP002084	0.550437	0.339	0.994883	-5.85808	0.091644	hsa_circRNA_101738	CAGGTATCTGCTTGTAATGACCAGCCTGCAGTCTATTCTTGAAAAT
ASCRP002834	0.550703	0.339	-0.993751	-5.85917	-0.323258	hsa_circRNA_102520	CACCTCCACAGATTGATCTGGATACTATTGATGTAAGCAACCTCAA
ASCRP004207	0.550703	0.34	0.993216	-5.85968	0.136914	hsa_circRNA_103927	AAACAGAAGAAGGTTGACCCCCTGTTTACAGTGCCAGCGCCACCAC
ASCRP000685	0.550703	0.34	0.993155	-5.85974	0.190402	hsa_circRNA_100298	GTGCTTAAGATTCAGTGCATTTGCCCAGTATAACATGGATCAGTTC
ASCRP003006	0.550703	0.34	0.993	-5.85989	0.119365	hsa_circRNA_102694	CTCTGTCCAGGATTCTCAAAGTTGGATTGGTGGAAACAATGAACCA
ASCRP004429	0.551745	0.34	-0.991247	-5.86158	-0.211966	hsa_circRNA_104156	CATGAACAAGCGCGTTCGTTCACATAGCTCCCAGTTTTAACATTTC
ASCRP003801	0.553793	0.342	-0.988173	-5.86453	-0.49556	hsa_circRNA_103503	GACATCAAGTATTCACCAGTTAATAGCACCAGCTGATTTTCACACC
ASCRP004118	0.553817	0.342	0.987425	-5.86524	0.171324	hsa_circRNA_103828	TTGTGCATTCAAACATAGCAACTGAGCTCTTTCACCATGCCTGGAT
ASCRP003767	0.553817	0.342	0.987192	-5.86547	0.359213	hsa_circRNA_103469	TTACCCAGTATCTTGGTGTTGCTGAAGAGGGTGGCTTTGAGTATAA
ASCRP003267	0.553817	0.342	0.986993	-5.86566	0.256907	hsa_circRNA_102960	GTTCAGAGAGTGAAAAATGTGAGGTTTTACAATATTCTGCAAGGGA
ASCRP001473	0.554189	0.343	-0.986122	-5.86649	-0.128586	hsa_circRNA_101106	TCATTTACAGATTTACACTGACTGGGCCAACCACTACCTAGCAAAA
ASCRP000483	0.554682	0.343	0.985092	-5.86747	0.397327	hsa_circRNA_100093	CTTAAATAAAGTGAAAGCCCTGTGTAAGGAATGTGTAGTAGAACGT
ASCRP000429	0.554783	0.344	0.984576	-5.86797	0.14049	hsa_circRNA_100039	ATTACGTTGACACTTACCATGCTGCTGCCCTTAGGTCCACAACTCC
ASCRP003620	0.554783	0.344	0.984195	-5.86833	0.407177	hsa_circRNA_103322	CCCCTGCTAGGTATCATTAATGGGATTGGAAATTTTAAGTGCCTTT
ASCRP004095	0.555781	0.345	0.982505	-5.86995	0.105904	hsa_circRNA_103805	ACACTTAACTGACCTGCGCGAAGTCTGGCTCAATTATCCTCTCCAC
ASCRP003853	0.55656	0.345	-0.981102	-5.87128	-0.273696	hsa_circRNA_103555	TTCTTTCTGTTTTTGCGAGGTACCAGCAACTTCAAGGTTTCTGCCA
ASCRP001687	0.55694	0.346	0.980222	-5.87212	0.1725	hsa_circRNA_101328	AGGAGCTGCTACTGTGCAACAACCCTCTGTGACCTGCCTGCTGCCT
ASCRP003286	0.557677	0.346	0.978876	-5.8734	0.42061	hsa_circRNA_102979	GATGCTGAAGGCTGTGGGTGAGCGTGGAGGATGCTCAGATGCACAC
ASCRP004119	0.558415	0.347	0.977529	-5.87468	0.206871	hsa_circRNA_103829	GCTACACCGGGGCTTCGTGGGACACATATGCAACATGCCTATGATT
ASCRP002864	0.558445	0.347	0.977108	-5.87508	0.25709	hsa_circRNA_102551	ACTTCTGCTGATGTGGATGAGTGCCAAGAATATGGTCCCGAGATTT
ASCRP003285	0.559411	0.348	0.975174	-5.87692	0.399067	hsa_circRNA_102978	ATGCTGGAAGGCTGTGGGTGAGCGTGGAGGATGCTCAGATGCACAC
ASCRP004102	0.559411	0.348	0.975082	-5.877	0.16863	hsa_circRNA_103812	TGGACATAACTAAGGTTGCTTCTCCATTTCTGGAGCCACATCTAGT
ASCRP005316	0.561692	0.35	0.971726	-5.88018	0.327086	hsa_circRNA_400020	ATTAGCTTGGGGGAATTTAGGTTTCATCTGTGTCTGGTAGCAGTGT
ASCRP000902	0.562351	0.35	0.970486	-5.88135	0.129653	hsa_circRNA_100521	AAGGCTTCCACCAGCAAGCTTATTGCAGGAGTGACCAGGACACTAC
ASCRP005122	0.563985	0.352	0.967653	-5.88402	0.193924	hsa_circRNA_104875	TCATGCACAGACATAGATGAGTGTGAAGTTTCTGGCCTGTGCAGGC
ASCRP001109	0.563985	0.352	-0.967598	-5.88407	-0.133397	hsa_circRNA_100735	ACTTAAGTCTGAATTTCGGCAGAATTTAGTCTACGCCTTCTCCGTC
ASCRP001225	0.564013	0.352	-0.96718	-5.88447	-0.175047	hsa_circRNA_100851	ACGGAGCCTGACCTCTTACTTCCTGTGGTACTTCCAGGCGCGACTG
ASCRP000231	0.564115	0.352	0.966665	-5.88495	0.460564	hsa_circRNA_001225	AGTGCCCGTGTGAGTGATTTGAAGGATGTGACAGATGATTTAAGTG
ASCRP004179	0.565324	0.353	0.964119	-5.88734	0.384559	hsa_circRNA_103899	CTGATAGAACAGTTATTATTTGCATCTGCTGGTGATGATGGAATTG
ASCRP004971	0.565324	0.354	-0.963124	-5.88828	-0.226293	hsa_circRNA_104720	ACATGGCCCAGTTGCTGAACCTGTTTGCATGAGTTGCTCCTGACGG
ASCRP003661	0.565324	0.354	0.962346	-5.889	0.11046	hsa_circRNA_103363	GGCTTTTACCCAGACAGAACAATTGTTTGACCAGACCCAACATCTA
ASCRP004841	0.565324	0.354	0.961897	-5.88943	0.130018	hsa_circRNA_104588	GAGGTCATGATGAAGGTGGTATAAGTTGAAATCCAAACCAGGAAAG
ASCRP000546	0.565324	0.354	-0.961869	-5.88945	-0.138006	hsa_circRNA_100157	AAAGCCACATGCTGATTCACCCCAAGAGTGGCCGTTCCTACCACGA
ASCRP000535	0.565324	0.355	-0.961708	-5.8896	-0.417257	hsa_circRNA_100146	TAGTGCCAAGGAAAGCAGCTGGCCCTTCTCAAGACCAATTCGGCTG
ASCRP003907	0.565324	0.355	-0.961454	-5.88984	-0.117851	hsa_circRNA_103612	TTCAAAGTGTATGCATCTCATTCAGCAGGGCAAGTGTCCAGAGAAT
ASCRP000601	0.565324	0.355	-0.961428	-5.88986	-0.199832	hsa_circRNA_100213	ACTACTTCAGGCACAGGTCTTCCCAAAAGTTATCTTCTGGGAAGAT
ASCRP001769	0.565324	0.355	-0.961324	-5.88996	-0.099035	hsa_circRNA_101410	CAGCAAAGGCAGATCACCCTGAGACTATAATGGAAGAAGTGAAAAT
ASCRP004434	0.565324	0.355	0.960508	-5.89073	0.445505	hsa_circRNA_104161	AACTCCATTGTACTTTGCTTGCAGATACATTGGCTGGCTGTGAATG
ASCRP005317	0.565324	0.355	-0.960054	-5.89115	-0.375212	hsa_circRNA_400021	GCTGTGATATAACTAGTTGTTTACGAAACCCCATCTCTACTAACAA
ASCRP003407	0.565324	0.356	-0.959508	-5.89166	-0.106328	hsa_circRNA_103103	TGGTGCGCAAGAGTAACAGTTACCCCTCAATGAGCGACCCCTACCT
ASCRP005023	0.565324	0.356	0.959166	-5.89198	0.092952	hsa_circRNA_104773	CATATGTGTTCCTCTGCAAAGGATAGAAAATGAAGTGGAACTCTTA
ASCRP004940	0.565324	0.356	-0.959021	-5.89212	-0.130614	hsa_circRNA_104688	AACAAGTTTGAGGGACTATCCCAGCAGTCGAGGTCCAACTGGCCCA
ASCRP000799	0.565324	0.356	0.959012	-5.89212	0.182241	hsa_circRNA_100416	GCTGTACAATCATCCTGGCCACTGCAGGAACCCACTTCAATACTCA
ASCRP004710	0.565324	0.356	-0.958996	-5.89214	-0.208256	hsa_circRNA_104456	CACCAGTTTTTGCTTCTGCCACAGCCACCTATATTGAGGAAGATGA
ASCRP004215	0.565993	0.357	0.957411	-5.89362	0.112667	hsa_circRNA_103935	TTATCTCATGCTGTGCAGATTCTTGCCAGCTCTCATTACTGCAGTT
ASCRP001481	0.565993	0.357	0.957184	-5.89383	0.198595	hsa_circRNA_101114	ACTTCTGGGCATATTTGAGGTGCTGCTGGTGAGTAGCAGCCGGTAC
ASCRP002256	0.565993	0.357	0.956713	-5.89427	0.179517	hsa_circRNA_101914	TCCACCAAAGATTTTGTACAGCAGCAATTTCTTACTCTCTCTGCAA
ASCRP001082	0.565993	0.357	-0.956606	-5.89437	-0.097597	hsa_circRNA_100708	CAAGATGGCACAGAAAATGACAGATGGCGAGACCTGGACAGGAAAT
ASCRP003663	0.566042	0.357	0.955984	-5.89495	0.109126	hsa_circRNA_103365	CTCACAAGACGATGTATGTTCATGCGGATGCTCCTACCAATAAAAC
ASCRP000172	0.566042	0.357	0.955777	-5.89514	0.754284	hsa_circRNA_000993	TGTTAATTCTGGGATCAAGGTGGTCGGACATTGTGTGGTGTAATGA
ASCRP004668	0.566042	0.358	-0.95512	-5.89575	-0.291967	hsa_circRNA_104412	AAGGCCATCGGCGAGATCACCTCCTCTCCACGGTCACATCCATTTC
ASCRP002490	0.566042	0.358	-0.955025	-5.89584	-0.166546	hsa_circRNA_102158	ATTTATTAAGAGCTCAGCAAAACAGTCCCTCATCTACGGGATCTGG
ASCRP001042	0.567657	0.359	0.952547	-5.89815	0.11859	hsa_circRNA_100668	TAAGGATGAGAGCAACTTATGACTCTCATCTCTGCTGCACGAGAAT
ASCRP005019	0.567996	0.359	0.951729	-5.89891	0.144765	hsa_circRNA_104769	GACACTTCCTAGAGCTCAGCCTGATTTTCTATTTTGTACATACATT
ASCRP002155	0.568063	0.36	0.951262	-5.89934	0.141892	hsa_circRNA_101810	TTACACTGAGAGGTCTTGTTCTTCCAGTATCTCAGCGTTTGAGTCA
ASCRP000082	0.569665	0.361	-0.948806	-5.90162	-0.093893	hsa_circRNA_000623	ATGGGTGGGGGGCCACTCCAGCATTTGTCTTGGTGATGCCAGGTCA
ASCRP000334	0.570086	0.361	-0.947881	-5.90247	-0.215848	hsa_circRNA_001805	AGAGTGAGAGATGATGCAACCTACTTCTCTCTAGAGGTAGTCAGAT
ASCRP000599	0.570289	0.362	-0.94724	-5.90306	-0.189691	hsa_circRNA_100211	CATACCAAAGGTTCCATCTTAGCCCACATCCAGAAGCAAAAGCACT
ASCRP000899	0.57134	0.362	0.945501	-5.90467	0.313213	hsa_circRNA_100517	AGAAATCTAAGAACTCGGTTGCCTTTGAGGATGTGGCTGTGAACTT
ASCRP005397	0.571936	0.363	0.944351	-5.90573	0.263101	hsa_circRNA_105055	AGGTCTTCCAGTGTCTGCAATATCCAGGGTTTCCGATGGCACCTGT
ASCRP002941	0.572105	0.363	0.943753	-5.90628	0.314308	hsa_circRNA_102628	TTTGCTGCCCGAAGCTTGACTTTTACTTGTTGGTGGATGTGAAACT
ASCRP002926	0.572321	0.364	-0.942903	-5.90707	-0.171771	hsa_circRNA_102613	AGAGTGACGGGACTCCCAAATTCGTCAGAGCACAGCTTATAGCTTA
ASCRP002169	0.572321	0.364	-0.942717	-5.90724	-0.086754	hsa_circRNA_101825	AAGAAGTCAGCTGGTCCACGACAAAGAGTTGGCAGCAGAAGATGAG
ASCRP000031	0.572529	0.364	-0.941968	-5.90793	-0.123159	hsa_circRNA_000300	CCTGGGGCAGGGGTGGCCTCTTTCACTTTAACCTGCTCCTCACCTT
ASCRP002210	0.572529	0.364	-0.941446	-5.90841	-0.155077	hsa_circRNA_101867	CTTTTTGCAGGTGTCCTCCACACATCTGTAGTCCTCCTCACAGAAA
ASCRP003298	0.572529	0.365	0.941122	-5.9087	0.210849	hsa_circRNA_102991	TCAGCAAAGGGCTGTGTCAGCGTGTTATGATGCCGTCCCGTACCAA
ASCRP002634	0.572529	0.365	-0.940932	-5.90888	-0.284133	hsa_circRNA_102315	TACAGTATCCAAGTGGCAATAGGCATCAAGCATGATGGAACCATGT
ASCRP001655	0.574042	0.366	0.938593	-5.91103	0.418585	hsa_circRNA_101295	TTCTTGGTACAGTGGTGGAAGTTGATGGGTCGAAACTAAATGTGAC
ASCRP004575	0.574042	0.366	-0.938222	-5.91137	-0.20608	hsa_circRNA_104311	GAGCTATCCAGATCTGCCTCCGCTTTCACAGTCCTCCAGATTTTTC
ASCRP004572	0.574883	0.367	-0.936184	-5.91323	-0.23255	hsa_circRNA_104308	GTCTTTCTTATTCAGGTATTCTGCCTTTGACTGCAACTCTTGTCGT
ASCRP001955	0.574883	0.367	0.936087	-5.91332	0.171836	hsa_circRNA_101606	TTATATGACTTGGCAGATCAACTACATGCTGCAGGCCTCATTGCTA
ASCRP004203	0.574883	0.367	0.935465	-5.91389	0.113706	hsa_circRNA_103923	AACCCTCTACATTGCTGCTAGGGTGAAGTAGAGAAATAAAGTCTCC
ASCRP001539	0.574883	0.367	-0.935332	-5.91401	-0.084207	hsa_circRNA_101176	GGAGCTCAAGCGCATTTGTAGCCATGAAGTGCCATCTTGCCCAATA
ASCRP005230	0.574883	0.367	0.935245	-5.91409	0.328809	hsa_circRNA_104983	CTTTTTAACGCCGTCTCCAACCTGGACATAGAGAGTAAGCTGAGTG
ASCRP003496	0.574938	0.368	-0.934796	-5.9145	-0.105065	hsa_circRNA_103198	TGCAGACCAGGTTCCATTACAGCTTATAGAAAGTGTTGAATGCCGA
ASCRP002844	0.575888	0.369	-0.932997	-5.91615	-0.246319	hsa_circRNA_102531	ACCTCCACAGCTTTTTAAAGATGACATCAGGTATCTGTTGACAATG
ASCRP004424	0.575888	0.369	0.932643	-5.91647	0.126292	hsa_circRNA_104151	ATTCCCAAGCAAGATTATTCTTCATTCTATGCACAAATACCAACCG
ASCRP004662	0.575888	0.369	-0.932399	-5.91669	-0.162466	hsa_circRNA_104402	TGCTTTTGTTATGTGTAAAGAACTGGCCAAGTCCAAGGCAGAAGTG
ASCRP004305	0.575888	0.369	0.93206	-5.917	0.196339	hsa_circRNA_104030	CATCTTTACACACTAAATCATGGAAGGGAAGTGGTTGCTGTGTATG
ASCRP003038	0.576086	0.369	-0.931428	-5.91758	-0.109226	hsa_circRNA_102726	ACTCTTGGTTGGGATAAGGAAGAGACTTCCACCTTAGGATAGTGTT
ASCRP003712	0.576354	0.37	0.930705	-5.91823	0.337846	hsa_circRNA_103414	TTTCCAATCATTTCTAAAGTTCCCGTGTCAGTGGCTATGATGACAC
ASCRP005305	0.576693	0.37	0.92989	-5.91898	0.248155	hsa_circRNA_400009	ATAGATAACTGTCTCTTGATTATGGAATCTCTGTCTCTGCCCAGGC
ASCRP003975	0.577114	0.371	-0.928971	-5.91981	-0.263486	hsa_circRNA_103681	CATTTTCCAGGATGAAGTTAAAGGAAGTAGATCGTACAGCCATGCA
ASCRP003560	0.577923	0.371	-0.927551	-5.9211	-0.129407	hsa_circRNA_103262	TCTTCATTTGTGAATACATAGGGTTACCTTCCCGCCAATGTAGACC
ASCRP003540	0.578792	0.372	0.925786	-5.9227	0.10907	hsa_circRNA_103242	TGATGTCATGCTCAAGGGGCTCTTTAAGCTCAAGAGGTTTGGATAT
ASCRP000401	0.578792	0.372	-0.925679	-5.9228	-0.140278	hsa_circRNA_100011	GGACACACAGGCTTCTCGTCAGTGCCTCGCAGGATGGTAAACTTAT
ASCRP004845	0.57912	0.373	0.924879	-5.92352	0.132577	hsa_circRNA_104592	GGGTTTTGTTAGCCCTACATGATCGAGGATATTATACCATTTATTG
ASCRP005283	0.580668	0.374	-0.922512	-5.92567	-0.35733	hsa_circRNA_105036	GGAGGAAGAGAGCCATGGGACCACACCACCACCACCACAACCAATA
ASCRP001462	0.581545	0.375	-0.92101	-5.92702	-0.164245	hsa_circRNA_101094	CACTACTGAGGACCCTGATGCTCCCATAAGACAGAAAATGCCCCTT
ASCRP001425	0.581578	0.375	-0.920131	-5.92781	-0.21106	hsa_circRNA_101057	GTAGGGGCAGGCTCCCTTTCCCAATGGTAGTTTTGTGAATGGCTTT
ASCRP002958	0.581578	0.375	-0.919967	-5.92796	-0.467227	hsa_circRNA_102645	GAACCCCTGGCATGTTAGCCGCTTGCAAGACCCTTCAAGAAGTAAC
ASCRP003082	0.581578	0.375	-0.919675	-5.92823	-0.198281	hsa_circRNA_102771	TCTGAAACAGGTTGCCAATTTGGCCTGTTCCATCTCCAACAATGAA
ASCRP000855	0.581578	0.375	0.919298	-5.92857	0.131148	hsa_circRNA_100472	AGAGCTGCTCAGTCTGGCATGCAGAGGCAGAAGAGGCCTGGACCTT
ASCRP004669	0.581578	0.376	-0.918921	-5.9289	-0.120195	hsa_circRNA_104413	ACCGCTTCATGGAGCAGTTTACAAATATTCAACTCCCTGGACATGT
ASCRP003537	0.581578	0.376	-0.918706	-5.9291	-0.107527	hsa_circRNA_103239	AGAGAAGAAGTCGGAGTTGAAGTCTGCAGATCTCCAGGGGAGCCCA
ASCRP002064	0.581994	0.376	0.917661	-5.93004	0.199019	hsa_circRNA_101717	GGAAACCATCCACGACCCTGACTGGAATGTCACGTGGAATACCAGC
ASCRP001674	0.581994	0.376	0.91742	-5.93026	0.225753	hsa_circRNA_101315	TCACAGGCAGGTCAGTCAGGAGATCCTAGAGCTATTAAATACTACA
ASCRP002360	0.582508	0.377	0.916384	-5.93119	0.102755	hsa_circRNA_102025	ACTCCTGAAGGCTTCCAATAAAAACAGGACAGCAGAACACACATAC
ASCRP003291	0.582773	0.377	-0.915401	-5.93207	-0.233943	hsa_circRNA_102984	TTCCCTCCTTCAGATAAGCATGGATTCCTGGTTCATTCTTGTTCTG
ASCRP000753	0.582773	0.378	-0.914836	-5.93258	-0.113978	hsa_circRNA_100368	ATGTAGCTGTGATGCAGTTGCGGAGGACTGGGGTTCAGACTTTCCG
ASCRP002171	0.582773	0.378	-0.914052	-5.93328	-0.09491	hsa_circRNA_101827	GCAGTAACTGGCTTTTGTGGCCACAGGAACCAATCTGTCTCTCCAG
ASCRP003078	0.582773	0.378	-0.913971	-5.93335	-0.188277	hsa_circRNA_102767	GCCAGTCATGTGGTCCTCGTTACCACCTCTTGGCTCACACCACACT
ASCRP004228	0.582773	0.378	-0.913835	-5.93347	-0.410687	hsa_circRNA_103948	TGTTGGCTCTCCTTAAACAGGATATACACATGACACCATCCACTGA
ASCRP000173	0.582773	0.379	-0.913181	-5.93406	-0.259764	hsa_circRNA_000996	GGGGAGGCAGGTCTCCTGTCTGCCTTCCCACAACCACGACCTGGGA
ASCRP001884	0.582773	0.379	-0.912834	-5.93437	-0.129408	hsa_circRNA_101533	TTCTAACAGCCCAAGACTGTGAATTGGAGAATCAAGAGGCACATGA
ASCRP003335	0.582773	0.379	-0.912078	-5.93505	-0.163493	hsa_circRNA_103029	AGGATTCCTTTCAACAGAGACAATGGACCTCAGATAGCCTATGTTC
ASCRP001646	0.582773	0.379	0.912051	-5.93507	0.421645	hsa_circRNA_101286	CTTGATGAAGCAGAAGATGATTTTAAAAAAGTGATGGTGACCCTGA
ASCRP004732	0.582773	0.379	-0.911965	-5.93515	-0.174743	hsa_circRNA_104478	ACCAGACCATCAACAGGATAAGACCTCGTCTAACCTACATGAAGCT
ASCRP005102	0.582773	0.379	0.911912	-5.93519	0.110163	hsa_circRNA_104855	AGCCTCAGCGAGGGGTGTTTGATGCTTCCCTCAAAATGGCTGGCTT
ASCRP004483	0.583054	0.38	0.910948	-5.93606	0.136967	hsa_circRNA_104210	GATACACATATGATGAGGGTTACATTTTGCCATCTGCCTTTCCAGA
[truncated: 1,072 more rows]

## Sheet: logFC>2
ID	adj.P.Val	P.Value	t	B	logFC	SPOT_ID	Alias
ASCRP004842	0.002397	1.56e-06	8.50269	5.47087	2.04188	hsa_circRNA_104589	hsa_circ_0001789
ASCRP002905	0.005441	7.09e-06	7.36292	4.1088	3.14985	hsa_circRNA_102592	hsa_circ_0052001
ASCRP000655	0.011503	4.49e-05	6.11171	2.39197	2.38822	hsa_circRNA_100267	hsa_circ_0002570
ASCRP002519	0.011852	6.34e-05	5.89306	2.06666	4.07073	hsa_circRNA_102191	hsa_circ_0045602
ASCRP001822	0.012794	8.74e-05	5.69339	1.76295	3.07324	hsa_circRNA_101471	hsa_circ_0034398
ASCRP002897	0.012794	9.17e-05	5.66407	1.7178	2.82635	hsa_circRNA_102584	hsa_circ_0003146
ASCRP002927	0.017477	0.000154	5.34997	1.22579	5.08754	hsa_circRNA_102614	hsa_circ_0006089
ASCRP005162	0.01804	0.00017	5.28823	1.12726	2.65695	hsa_circRNA_104915	hsa_circ_0088485
ASCRP003426	0.018901	0.000236	5.09565	0.81618	4.49176	hsa_circRNA_103122	hsa_circ_0004339
ASCRP003358	0.018901	0.000267	5.0228	0.69704	2.325	hsa_circRNA_103053	hsa_circ_0007094
ASCRP002874	0.018901	0.000318	4.92195	0.53083	3.2951	hsa_circRNA_102561	hsa_circ_0051246
ASCRP001355	0.018901	0.000334	4.89294	0.48274	3.54226	hsa_circRNA_100984	hsa_circ_0002019
ASCRP005194	0.018901	0.000345	4.8734	0.45029	2.55315	hsa_circRNA_104947	hsa_circ_0007613
ASCRP003124	0.019041	0.000384	4.81286	0.34938	2.78768	hsa_circRNA_102815	hsa_circ_0003192
ASCRP002251	0.019212	0.000431	4.74673	0.23858	2.06608	hsa_circRNA_101909	hsa_circ_0005217
ASCRP001668	0.019402	0.000458	4.712	0.18014	2.51336	hsa_circRNA_101309	hsa_circ_0007404
ASCRP003088	0.021414	0.000593	4.56538	-0.06836	3.39704	hsa_circRNA_102777	hsa_circ_0055521
ASCRP002928	0.025995	0.000855	4.3603	-0.42058	3.39779	hsa_circRNA_102615	hsa_circ_0008768
ASCRP003889	0.025995	0.000855	4.36015	-0.42084	2.63586	hsa_circRNA_103594	hsa_circ_0004228
ASCRP003857	0.027286	0.000956	4.29825	-0.52815	3.22174	hsa_circRNA_103559	hsa_circ_0005051
ASCRP002884	0.027286	0.000959	4.29612	-0.53185	2.54184	hsa_circRNA_102571	hsa_circ_0008615
ASCRP000770	0.028051	0.00101	4.26772	-0.58122	2.84223	hsa_circRNA_100385	hsa_circ_0004370
ASCRP005056	0.033463	0.00151	4.04621	-0.96933	3.04963	hsa_circRNA_104807	hsa_circ_0001866
ASCRP004073	0.048343	0.0034	3.60839	-1.74857	2.36002	hsa_circRNA_103783	hsa_circ_0007380
ASCRP001667	0.102693	0.0132	2.88899	-3.03879	2.35255	hsa_circRNA_101308	hsa_circ_0031027

## Sheet: log<-2
ID	adj.P.Val	P.Value	t	B	logFC	SPOT_ID	Alias
ASCRP000657	0.07709	0.00759	-3.18117	-2.51629	-2.25597	hsa_circRNA_100269	hsa_circ_0013048
