# Supplementary material for: Comprehensive Analysis of a circRNA-miRNA-mRNA Network to Reveal Potential Inflammation-Related Targets for Gastric Adenocarcinoma
Source: Mediators Inflamm. 2020 Aug 1;2020:9435608. doi: 10.1155/2020/9435608 (PMC7416288; doi:10.1155/2020/9435608)
Supplement: Supplementary 3 — Table S3: differentially expressed miRNAs between tumor and normal tissues. [file 9435608.f3.xls]

## Sheet: Sheet1
adj.P.Val	P.Value	t	B	logFC	miRNA_ID_LIST	SPOT_ID
0.00582	5.65e-06	-10.298	4.58024	-2.78068		no information
0.00582	8.44e-06	9.7709	4.2156	3.77415		no information
0.00582	1.002e-05	9.5522	4.05744	3.57701	hsa-miR-3910
0.00582	1.28e-05	9.24831	3.83064	4.39064	hsa-miR-4474-5p
0.00582	1.306e-05	9.22372	3.81192	3.42177	hsa-miR-4774-5p
0.00582	1.302e-05	10.4526	3.75931	3.34397		no information
0.00582	1.409e-05	9.13204	3.74163	2.58266	hsa-miR-3074-3p
0.00582	1.491e-05	9.06395	3.68892	3.07431	hsa-miR-3607-5p
0.00582	1.869e-05	8.79499	3.47635	2.72186	hsa-miR-34c-3p
0.00582	1.992e-05	8.72077	3.41646	2.51617	hsa-miR-5008-5p
0.00582	2.061e-05	8.68096	3.3841	2.76174	hsa-miR-499a-3p
0.00582	2.295e-05	8.55678	3.28214	2.58882		no information
0.00582	2.359e-05	8.52536	3.25609	2.27618		no information
0.00582	2.391e-05	8.50983	3.24318	2.62179	hsa-miR-4776-5p
0.00582	2.733e-05	8.35843	3.11599	3.81063	hsa-miR-5000-3p
0.00582	2.741e-05	8.35507	3.11314	2.40007		no information
0.00582	3.175e-05	8.19094	2.97248	4.03235	hsa-miR-5579-3p
0.00582	3.49e-05	8.08701	2.88189	3.66673	ebv-miR-BHRF1-2-5p
0.00582	3.661e-05	8.0347	2.83585	3.1129		no information
0.00582	3.79e-05	8.9208	2.82968	3.30077	hsa-miR-5692b/hsa-miR-5692c
0.00582	3.778e-05	8.00023	2.80536	2.43248		no information
0.00582	3.804e-05	7.99291	2.79886	3.89057	hsa-miR-4418
0.00582	3.872e-05	7.97355	2.78165	2.20082		no information
0.00582	3.951e-05	7.95178	2.76226	2.98876		no information
0.00648	4.653e-05	7.7766	2.60422	2.80089		control
0.00648	4.774e-05	7.74918	2.57917	2.78676	hsa-miR-4714-3p
0.00648	4.982e-05	7.70416	2.53785	3.17988	hsa-miR-548au-3p
0.00648	5.189e-05	7.66142	2.49839	2.62564		no information
0.00648	5.314e-05	7.63646	2.47526	2.66861	hsa-miR-3132
0.0066	5.595e-05	7.58264	2.42512	2.92423	hsa-miR-4715-5p
0.00663	5.986e-05	-7.51243	2.3592	-2.71204		no information
0.00663	5.999e-05	7.5103	2.35719	2.46702	hsa-miR-4699-5p
0.00671	6.314e-05	7.45751	2.30722	2.55522		no information
0.00671	6.444e-05	7.4365	2.28724	2.62823	hsa-miR-4691-5p
0.00692	6.849e-05	7.37418	2.22766	2.18473		no information
0.00728	7.567e-05	7.27316	2.13007	2.51506		no information
0.00728	7.689e-05	7.25702	2.11436	3.36754		no information
0.00728	7.822e-05	7.23975	2.09752	2.57872	hsa-miR-342-3p
0.00746	8.224e-05	7.18945	2.04825	2.71883		no information
0.00755	8.721e-05	7.13099	1.99059	2.09255	hsa-miR-4801
0.00755	8.954e-05	7.10479	1.96461	1.90876		no information
0.00755	9.062e-05	7.09291	1.9528	3.07533	hsa-miR-214-5p
0.00755	9.178e-05	7.0804	1.94034	1.91675		no information
0.0076	9.451e-05	7.05144	1.91143	2.37385	hsa-miR-93-3p
0.00774	9.985e-05	6.99745	1.85725	4.98256		control
0.00774	0.0001065	6.93442	1.79352	2.18198	hsa-miR-548v
0.00774	0.00010708	6.92914	1.78815	2.73104	hsa-miR-3140-3p
0.00774	0.00010711	6.92888	1.78788	2.62183	hsa-miR-323b-3p
0.00774	0.00010726	6.92756	1.78655	2.70424		no information
0.00801	0.00011893	6.82758	1.6843	2.15016	hsa-miR-222-5p
0.00801	0.00011977	6.82084	1.67736	2.18589	hsa-miR-148b-5p
0.00801	0.00012248	6.79937	1.65522	3.04274	hsa-miR-494-3p
0.00801	0.00012316	6.79407	1.64973	2.01497		no information
0.00801	0.0001232	6.79375	1.6494	2.74722	hsa-miR-5003-5p
0.00801	0.0001251	6.77904	1.63419	2.30225	hsa-miR-3664-3p
0.00801	0.00012757	6.76038	1.61484	2.60645	hsa-miR-3663-3p
0.00801	0.00012994	6.74281	1.59658	2.16127		no information
0.00801	0.00013264	6.72324	1.57619	3.5078		no information
0.00801	0.00013449	6.71007	1.56244	1.91487	hsa-miR-3914
0.00801	0.00013594	6.69984	1.55174	2.69933	ebv-miR-BART22
0.00801	0.00013818	6.68434	1.53551	4.02628	hsa-miR-187-5p
0.00811	0.00014212	6.65776	1.5076	1.82712	hsa-miR-922
0.00842	0.00015254	6.59116	1.43725	2.7761	hsa-miR-3671
0.00842	0.00015351	-6.58519	1.43091	-1.83515	ebv-miR-BART19-3p
0.00842	0.00015468	6.57809	1.42337	2.73183		no information
0.00855	0.00015943	6.54979	1.39324	1.79761		no information
0.00869	0.00016463	6.51987	1.36127	1.69724		no information
0.00934	0.00017959	6.43931	1.27457	2.2355	hsa-miR-4517
0.00959	0.00018921	6.39128	1.22245	2.27972		no information
0.00959	0.00018969	6.38893	1.21989	2.00766		no information
0.00959	0.00019454	6.36583	1.19471	2.48989		no information
0.00959	0.00019511	6.36311	1.19174	1.71593	hsa-miR-3182
0.00962	0.00019858	-6.34701	1.17414	-1.71937	ebv-miR-BART6-3p
0.00967	0.00020234	6.3299	1.15538	2.05444	kshv-miR-K12-3-3p
0.01003	0.00021255	6.28512	1.10612	3.02991	hsa-miR-875-3p
0.01014	0.00021773	6.26332	1.08203	2.73703	hsa-miRPlus-A1087
0.01052	0.00022886	6.21832	1.0321	1.82216		no information
0.01059	0.0002335	6.20028	1.012	2.39281		no information
0.01071	0.00023914	6.17887	0.98808	2.80507		no information
0.01075	0.00024302	6.16445	0.97194	1.6863	hsa-miR-4659b-3p
0.01078	0.00024724	-6.14903	0.95465	-1.59074		no information
0.01078	0.00024994	6.13933	0.94374	1.80503	hsa-miR-5692c
0.0109	0.00025581	6.11865	0.92047	3.23914	hsa-miR-411-5p
0.01141	0.00027102	6.06737	0.86248	2.63444	hsa-miR-1266-5p
0.0115	0.00027629	6.05032	0.84311	1.90217	hsa-miR-3064-3p
0.01199	0.00029146	6.00323	0.78941	2.07355		no information
0.0125	0.00031086	5.94673	0.72455	2.93501		no information
0.0125	0.00031098	5.9464	0.72417	2.27716	hsa-miR-98-3p
0.01252	0.00032113	5.91838	0.69182	1.83342		no information
0.01252	0.00032145	5.91752	0.69083	2.02852	hsa-miR-3154
0.01252	0.0003221	5.91577	0.68881	1.79824		no information
0.01258	0.00032948	5.89607	0.66599	2.02003		no information
0.01258	0.00033072	5.89281	0.66221	1.99811		no information
0.01258	0.00033425	5.8836	0.65152	2.24096	hsa-miR-421
0.01322	0.00037977	5.77353	0.52278	3.1874		no information
0.01322	0.00038174	5.76909	0.51755	3.89017	hsa-miR-3168
0.01322	0.00038311	5.76602	0.51393	2.22077		no information
0.01322	0.00038444	5.76306	0.51044	2.69216	hsa-miR-4520-3p
0.01322	0.00039178	5.74688	0.49134	1.64119		no information
0.01322	0.00039246	5.74541	0.4896	2.88103	hsa-miR-379-5p
0.01322	0.00039359	5.74294	0.48668	2.19525	hsa-miR-33a-3p
0.01322	0.00039557	5.73866	0.48162	1.65755	ebv-miR-BART11-3p
0.01322	0.0003963	5.73709	0.47976	1.54358		no information
0.01322	0.00039814	5.73315	0.47509	1.73614		no information
0.01322	0.00039843	5.73251	0.47434	1.72742		no information
0.01322	0.00039858	5.73221	0.47398	2.02029	hsa-miR-4652-5p
0.01322	0.00040088	5.7273	0.46817	2.71591		no information
0.01322	0.000407	5.71439	0.45286	3.81391		no information
0.01322	0.00040735	5.71366	0.45199	2.08914	hsa-miR-3192-5p
0.0133	0.00041387	5.70016	0.43595	3.30755	hsa-miR-1197
0.0133	0.00041737	5.693	0.42744	2.61601	hsa-miR-539-3p
0.01331	0.00042387	5.6799	0.41184	2.06372		no information
0.01331	0.00042524	5.67715	0.40856	2.1366		no information
0.01342	0.00043227	5.66326	0.39199	1.87314		no information
0.01401	0.0004555	5.61909	0.33909	1.99189		no information
0.01453	0.00047814	5.57833	0.29001	1.64937	hsa-miR-217
0.01453	0.00048076	5.57376	0.28449	1.96914		no information
0.01453	0.00048732	5.56241	0.27076	2.6225	hsa-miR-1271-5p
0.01453	0.00048856	5.56029	0.2682	3.39745	ebv-miR-BART17-5p
0.01464	0.00049644	5.5469	0.25199	3.08609	hsa-miR-323b-5p
0.01469	0.00050242	-5.53691	0.23987	-1.60884	hsa-miR-1178-3p
0.01475	0.0005098	5.52476	0.22512	1.97288	hsa-miR-5588-5p
0.01475	0.00052419	5.5016	0.19692	1.66703		no information
0.01475	0.00052996	5.4925	0.18583	1.55941	hsa-miR-4524a-5p
0.01475	0.00053063	5.49147	0.18456	2.13489		no information
0.01475	0.00053063	5.49146	0.18456	1.56568	hsa-miR-3174
0.01475	0.00053546	-5.48394	0.17537	-2.2066		no information
0.01573	0.00061632	5.76915	0.1751	2.66613	hsa-miR-4509
0.01475	0.00053684	5.4818	0.17276	2.46849	hsa-miR-196b-3p
0.01475	0.00053768	5.4805	0.17118	1.66718		no information
0.01477	0.00054267	5.47286	0.16182	1.90898	hsa-miR-4420
0.015	0.00056193	-5.44402	0.12648	-1.67071	hsa-miR-4785
0.015	0.00056258	5.44306	0.1253	2.09332	hsa-miR-4659b-5p
0.015	0.00056443	5.44036	0.12199	3.04642	hsa-miR-99a-3p
0.015	0.00056807	5.43505	0.11547	1.6659	hsa-miR-4504
0.015	0.00057225	5.42901	0.10804	1.56818		no information
0.01548	0.00059504	5.39689	0.06844	2.11217		no information
0.01605	0.00068831	5.66462	0.06514	1.88585		no information
0.01551	0.00060041	5.38951	0.05933	2.31325	hsa-miR-567
0.01573	0.00062012	5.36304	0.02656	1.58896	hsa-miR-5197-5p
0.01573	0.00062261	5.35977	0.0225	2.56733		no information
0.01605	0.00064105	5.33593	-0.00712	1.66048		no information
0.01605	0.00064568	5.33007	-0.01442	1.68273	hsa-miR-3120-3p
0.01605	0.00066373	5.30763	-0.0424	1.83746		no information
0.01605	0.00066408	5.3072	-0.04293	2.05272	hsa-miR-4776-3p
0.01605	0.00066956	5.30052	-0.05128	2.16986		no information
0.01605	0.00066961	5.30046	-0.05136	1.76564	hsa-miR-3144-5p
0.01605	0.00067522	5.29368	-0.05983	2.29586		no information
0.01605	0.00067525	5.29365	-0.05987	1.59613		no information
0.01605	0.00067741	5.29106	-0.06311	2.62859	hsa-miR-95-3p
0.01605	0.00068924	5.27702	-0.08069	2.12692	hsa-miR-648
0.01605	0.00069411	5.27132	-0.08784	2.39761	hsa-miR-378i
0.01605	0.00069429	5.27111	-0.08811	2.19754		no information
0.01626	0.00070774	5.25559	-0.1076	2.78834	hsa-miR-455-3p
0.01644	0.00072718	5.23373	-0.13511	2.43149	hsa-miR-20a-3p
0.01644	0.0007279	5.23292	-0.13613	1.49109	hsa-miR-374b-3p
0.01644	0.00072954	5.23111	-0.13841	2.1443	hsa-miR-140-3p
0.01651	0.00073711	5.2228	-0.1489	1.727	hsa-miR-543
0.01699	0.00076342	5.1946	-0.18454	2.49749	hsa-miR-377-3p
0.01854	0.00089096	5.4254	-0.19271	3.06178		no information
0.01706	0.00077412	5.18344	-0.19868	3.63478	hsa-miR-4711-5p
0.01706	0.00077879	5.17862	-0.20479	2.72363	hsa-miR-410-5p
0.01706	0.00078114	5.1762	-0.20786	2.89244	hsa-miR-301a-3p
0.01709	0.00078757	5.16964	-0.2162	4.06467		no information
0.01711	0.00079304	5.16411	-0.22323	1.40144		no information
0.01732	0.00080755	-5.14962	-0.24166	-1.38761		no information
0.0175	0.00082097	5.13646	-0.25842	1.65649		no information
0.01763	0.00083232	5.12552	-0.27239	2.12934		no information
0.01805	0.00085896	5.10047	-0.30443	1.62475		no information
0.01805	0.0008623	5.09739	-0.30838	2.27122	hsa-miR-302d-5p
0.02	0.00103177	5.2924	-0.33988	1.64466	hsa-miR-563
0.01904	0.00092222	5.04422	-0.37673	1.7647	hsa-miR-4790-5p
0.01904	0.00092571	5.04124	-0.38057	1.50369	hsa-miR-1265
0.01921	0.00094083	5.02847	-0.39706	2.17722	hsa-miR-1263
0.01921	0.00094952	5.02123	-0.40642	1.69983		no information
0.01921	0.00095031	5.02057	-0.40727	1.45593		no information
0.01931	0.0009604	5.01227	-0.41802	1.39226		no information
0.02036	0.00113203	5.20943	-0.43308	3.84248	hsa-miR-4779
0.01985	0.00099328	4.98584	-0.4523	1.81033		no information
0.01993	0.00101068	-4.97224	-0.46997	-1.58393	kshv-miR-K12-4-3p
0.01993	0.00101151	4.97159	-0.47082	1.51546		no information
0.01993	0.00101818	4.96646	-0.4775	1.55201	hsa-miR-4661-3p
0.01993	0.00101985	4.96518	-0.47917	1.81827	hsa-miR-4718
0.02	0.00104013	4.94978	-0.49923	2.03355	hsa-miR-4293
0.02	0.00104236	4.94812	-0.50141	1.82441	hsa-miR-19b-1-5p
0.02	0.00105451	4.93908	-0.51321	1.53433	hsa-miR-212-3p
0.02	0.00105512	4.93862	-0.5138	1.82756		no information
0.02	0.0010648	-4.93151	-0.5231	-1.66422	hsa-miR-596
0.02	0.00106796	4.92919	-0.52613	2.00636	hsa-miR-4321
0.02	0.00106862	4.92872	-0.52675	2.55978		no information
0.0201	0.00107931	4.92097	-0.53689	2.31273	hsa-miR-4291
0.02024	0.00109308	4.9111	-0.54981	2.37104	hsa-miR-214-3p
0.02024	0.00109822	4.90746	-0.55459	1.86499	hsa-miR-1206
0.02036	0.00111133	-4.89824	-0.56668	-1.60154		no information
0.02036	0.00112264	4.89039	-0.57699	2.07233		no information
0.02036	0.00113075	4.88481	-0.58433	3.72479	hsa-miR-4457
0.02036	0.00113353	4.8829	-0.58683	1.56906		no information
0.02062	0.00115398	4.86906	-0.60505	1.9063		no information
0.02071	0.0011648	4.86184	-0.61456	1.38258	hsa-miR-4730
0.02078	0.00118177	4.85067	-0.6293	1.846	hsa-miR-34a-5p
0.02078	0.00118597	4.84793	-0.63292	1.751	hsa-miR-4638-5p
0.02078	0.00118666	-4.84748	-0.63351	-1.36586		no information
0.02088	0.0012043	4.8361	-0.64855	1.86483		no information
0.02088	0.00120463	4.83589	-0.64883	2.22085		no information
0.02088	0.0012096	-4.83272	-0.65302	-1.51868	hsa-miR-519e-3p
0.02104	0.00122676	-4.82186	-0.66739	-1.36109	hsa-miR-652-5p
0.02104	0.00123097	-4.81923	-0.67087	-1.23654		no information
0.02109	0.00124511	4.81045	-0.68252	2.51996	hsa-miR-101-5p
0.02109	0.00124608	4.80985	-0.68331	1.56077		no information
0.02113	0.00125614	4.80367	-0.69151	1.73126	hsa-miR-5590-5p
0.02113	0.00126011	4.80125	-0.69472	3.07861		no information
0.02115	0.00126746	4.79678	-0.70066	1.85062		no information
0.02127	0.0012806	4.78887	-0.71117	2.08968		no information
0.02194	0.00132699	4.76163	-0.74746	1.99476	hsa-miR-4659a-5p
0.02199	0.00133637	4.75625	-0.75464	2.06673		no information
0.02201	0.00136077	4.74243	-0.77309	2.73046	hsa-miR-199a-3p/hsa-miR-199b-3p
0.02201	0.00136111	4.74224	-0.77335	2.08583	hsa-miR-3129-5p
0.02201	0.00136353	4.74089	-0.77515	1.69205	hsa-miR-548q
0.02201	0.00136409	4.74057	-0.77557	1.98777	hsa-miR-640
0.02201	0.00137075	4.73686	-0.78054	1.34946	hsa-miR-593-5p
0.02201	0.00138003	-4.73172	-0.78742	-1.55606		no information
0.02201	0.00138263	4.73028	-0.78935	3.48295	hsa-miR-4522
0.02201	0.00140232	4.71952	-0.80377	1.57175	hsa-miR-4676-5p
0.02201	0.00141494	4.71271	-0.8129	1.54828		no information
0.02201	0.00141586	4.71221	-0.81357	1.35637		no information
0.02201	0.00141882	-4.71062	-0.8157	-1.34644	hsv2-miR-H20
0.02201	0.00142223	4.7088	-0.81814	1.82612		no information
0.02201	0.00142405	4.70782	-0.81945	1.82611	hsa-miR-3663-5p
0.02201	0.00142442	4.70763	-0.81972	1.53938	hsa-miR-4791
0.0222	0.00145542	-4.69128	-0.84168	-1.62909	hsa-miR-5582-3p
0.0222	0.00145655	4.69069	-0.84247	1.50085	hsa-miR-33b-3p
0.0222	0.00146388	4.68689	-0.84759	1.75602		no information
0.0222	0.00146459	4.68652	-0.84809	2.32856	hsa-miR-329-3p
0.0222	0.00146853	4.68449	-0.85082	1.49594		no information
0.02223	0.00147662	4.68032	-0.85643	1.78727	hsa-miR-3614-5p
0.02226	0.00148465	4.67622	-0.86196	1.33228		no information
0.02228	0.00149276	4.67209	-0.86752	1.49363	hsa-miR-3164
0.02246	0.001517	4.65991	-0.88395	1.95918	hsa-miR-219b-5p
0.02246	0.00152715	-4.65487	-0.89076	-1.61545		no information
0.02246	0.0015278	4.65455	-0.89119	1.39132		no information
0.02246	0.00153427	4.65136	-0.8955	1.7734		no information
0.02246	0.00153611	4.65045	-0.89673	1.77276	hsa-miR-3942-5p
0.02267	0.0015575	4.64002	-0.91083	2.77255		no information
0.02267	0.00156328	4.63722	-0.91462	2.81766	hsa-miR-181c-5p
0.02292	0.00159206	4.62348	-0.93323	1.80398	hsa-miR-4670-5p
0.02292	0.00159334	4.62287	-0.93405	1.31831		no information
0.02304	0.00161003	4.61503	-0.94469	1.91637	hsa-miR-455-5p
0.02304	0.00161491	4.61275	-0.94777	1.45073		no information
0.02328	0.00164326	4.59968	-0.96553	2.60459	hsa-miR-9-5p
0.02328	0.00164466	4.59904	-0.9664	1.65927		no information
0.02353	0.00167501	4.58532	-0.98506	2.56124	hsa-miR-335-5p
0.02353	0.0016761	4.58483	-0.98573	1.56294	hsa-miR-3118
0.02356	0.00168503	4.58085	-0.99115	2.11743	hsa-let-7i-3p
0.02372	0.00170432	4.57233	-1.00276	2.09496		no information
0.02512	0.00199487	4.71995	-1.00523	1.62603		no information
0.02372	0.00171328	4.56841	-1.00811	1.65927		no information
0.02372	0.0017236	4.56391	-1.01424	1.54146		no information
0.02372	0.00172838	4.56184	-1.01707	1.41564		no information
0.02372	0.00172972	4.56126	-1.01786	2.11136	hsa-miR-628-5p
0.02382	0.00174389	4.55516	-1.02619	1.54138	hsa-miR-4789-3p
0.02386	0.00175518	4.55034	-1.03278	1.26002		no information
0.02386	0.00176005	4.54827	-1.0356	1.28815		no information
0.02389	0.00176908	4.54445	-1.04083	1.65386		no information
0.02394	0.00177948	4.54008	-1.04681	2.20146	hsa-miR-199a-5p
0.02401	0.00179122	4.53518	-1.05352	1.40007	hsa-miR-548ai/hsa-miR-570-5p
0.02404	0.00180649	4.52885	-1.06219	1.9021	hsa-miR-4489
0.02404	0.00180735	-4.5285	-1.06267	-1.28215		no information
0.0241	0.00181842	4.52395	-1.06891	1.44341	hsa-miR-5089-5p
0.02414	0.00182842	4.51987	-1.0745	2.42212		no information
0.0245	0.00186249	4.50614	-1.09335	3.05407	hsa-miR-215-5p
0.0246	0.00188058	-4.49895	-1.10321	-1.5375	sv40-miR-S1-5p
0.0246	0.00188563	-4.49696	-1.10595	-1.75631	hsa-miR-1202
0.0246	0.00189681	4.49257	-1.11199	1.75145	hsa-miR-23b-5p
0.0246	0.00189846	4.49193	-1.11287	1.2919		no information
0.02467	0.00191038	4.48729	-1.11927	1.53428	hsa-miR-4727-5p
0.02469	0.00192395	-4.48204	-1.12649	-1.85244		no information
0.02469	0.00192589	4.48129	-1.12752	1.20387		no information
0.02478	0.0019401	4.47584	-1.13502	1.29488		no information
0.0248	0.00195391	4.47059	-1.14227	1.74914	hsa-miR-93-5p
0.0248	0.00195543	4.47002	-1.14306	1.2668		no information
0.02509	0.00198578	4.45862	-1.15878	1.5468	hsa-miR-218-1-3p
0.02513	0.00200339	4.4521	-1.1678	2.17082		no information
0.02538	0.00203674	4.43991	-1.18465	1.22517	hsa-miR-9-3p
0.02538	0.002037	4.43982	-1.18478	2.43561	hsa-miR-4317
0.02574	0.00207329	4.4268	-1.20281	2.14028	hsa-miR-152-3p
0.02588	0.00209177	4.42026	-1.21187	1.20172	hsa-miR-4781-3p
0.02638	0.00214022	4.40342	-1.23525	1.41064	hsa-miR-3605-5p
0.02667	0.00217117	4.39287	-1.24991	1.34715		no information
0.02673	0.00218378	4.38862	-1.25582	1.52729		no information
0.02712	0.00222262	4.3757	-1.27382	1.57789		no information
0.02729	0.00224476	4.36844	-1.28394	1.42318	hsa-miR-409-5p
0.02746	0.00226667	4.36133	-1.29385	1.49762	hsa-miR-499b-5p
0.02757	0.0022828	4.35614	-1.30109	1.53702	hsa-miR-760
0.02927	0.002702	4.46931	-1.31315	1.65983		no information
0.028	0.00233024	4.34112	-1.32209	1.90826		no information
0.028	0.00233453	4.33977	-1.32397	2.5784	hsa-miR-525-5p
0.02807	0.00234842	4.33544	-1.33003	1.31476		no information
0.02862	0.00240238	4.31889	-1.35322	1.3209		no information
0.02867	0.00241453	4.31521	-1.35838	1.26984	hsa-miR-411-3p
0.02994	0.00282635	4.43278	-1.35888	2.65983	hsa-miR-5702
0.02881	0.00244833	-4.3051	-1.37257	-1.54366		no information
0.02881	0.00245194	4.30403	-1.37407	1.28524		no information
0.02881	0.00245821	4.30217	-1.37668	1.70547	hsa-miR-3650
0.02881	0.00245929	4.30185	-1.37713	1.47255	hsa-miR-376a-5p
0.02885	0.00247095	4.29841	-1.38196	1.61143	hsa-miR-361-5p
0.02886	0.00248111	4.29543	-1.38615	1.86445		no information
0.02886	0.00248763	4.29353	-1.38883	1.39607	hsa-miR-4289
0.02899	0.00250741	4.28778	-1.39691	1.31281		no information
0.02916	0.00254084	4.27817	-1.41044	1.60778	hsa-miR-3176
0.02916	0.00254995	4.27557	-1.41409	2.44381	hsa-miR-4757-3p
0.02916	0.00256289	4.27191	-1.41926	1.48545		no information
0.02916	0.00256346	4.27175	-1.41948	1.19308		no information
0.02916	0.00257219	4.26928	-1.42296	1.97881	hsa-miR-151a-5p/hsa-miR-151b
0.02916	0.00257684	4.26797	-1.4248	2.04382	hsa-miR-10a-5p
0.02916	0.00258631	-4.26532	-1.42855	-1.52431		no information
0.02916	0.00259207	-4.2637	-1.43082	-1.34989		no information
0.02916	0.00259581	4.26266	-1.43229	1.31356	hsa-miR-4436a
0.03071	0.00304777	4.3719	-1.43557	2.42895	hsa-miR-5707
0.02926	0.00261376	4.25767	-1.43933	2.7016		no information
0.02926	0.00262195	-4.25541	-1.44252	-1.16687		no information
0.02927	0.0026441	4.24933	-1.45111	1.54416	hsa-miR-3681-5p
0.02927	0.00266208	4.24443	-1.45803	1.4175		no information
0.02927	0.00267637	4.24057	-1.46349	1.43069		no information
0.02927	0.00268225	4.23898	-1.46573	1.93349	hsa-miR-15b-5p
0.02927	0.00268868	4.23725	-1.46818	1.40904	hsa-miR-1-5p
0.02927	0.00269042	4.23678	-1.46884	1.41627	hsa-miR-152-5p
0.02927	0.00269613	4.23525	-1.471	1.40278	hsa-miR-3177-5p
0.02927	0.00269834	4.23466	-1.47184	2.10858	hsa-miR-188-3p
0.02927	0.00270484	4.23293	-1.4743	1.33808	ebv-miR-BART21-3p
0.02955	0.00273919	4.22382	-1.48718	2.50374	hsa-miR-3919
0.02955	0.00275076	4.22079	-1.49148	1.58634		no information
0.02955	0.00275578	-4.21947	-1.49334	-1.17589		no information
0.02963	0.00277244	4.21513	-1.4995	1.86385	hsa-miR-3974
0.02965	0.00278218	4.21261	-1.50308	1.52338	hsa-miR-4738-5p
0.02994	0.00282434	4.20178	-1.51843	3.94326	hsa-miR-5186
0.03006	0.00284651	4.19616	-1.52642	1.08511	hsa-miR-3657
0.03025	0.00287239	4.18966	-1.53565	1.93596		no information
0.03032	0.00288835	4.18568	-1.54131	2.34717		no information
0.03037	0.00292383	-4.17691	-1.55377	-1.61003	ebv-miR-BART20-3p
0.03037	0.00292428	4.17681	-1.55393	1.45073	hsa-miR-4662a-3p
0.03037	0.00292639	4.17629	-1.55467	1.56931	hsa-miR-600
0.03037	0.00292729	4.17607	-1.55498	1.29865	hsa-miR-4684-5p
0.03041	0.00295261	-4.16989	-1.56377	-1.13035	hsa-miR-1973
0.03041	0.00295548	4.16919	-1.56477	1.33748	hsa-miR-7-1-3p
0.03041	0.00295725	4.16877	-1.56538	1.4118	hsa-miR-370-5p
0.03065	0.00298875	4.16117	-1.57619	1.72361	hsa-miR-3692-3p
0.03071	0.00300292	4.15779	-1.58102	2.59012	hsa-miR-34b-5p
0.03071	0.00301333	4.15531	-1.58455	1.24954	hsa-miR-1244
0.03071	0.00304051	-4.14889	-1.59372	-1.49282	hsa-miR-30c-1-3p
0.03071	0.00305314	4.14592	-1.59795	1.32899	hsa-miR-4713-3p
0.03071	0.00305724	4.14496	-1.59932	1.47805		no information
0.03071	0.00306013	4.14429	-1.60029	2.04895		no information
0.03071	0.00306443	4.14328	-1.60172	1.3063	hsa-miR-4999-3p
0.03083	0.00308522	4.13845	-1.60862	1.6903		no information
0.03094	0.00310478	4.13394	-1.61507	2.21156		no information
0.03098	0.0031181	4.13088	-1.61944	1.50277	hsa-miR-548ad-3p
0.03098	0.0031259	4.1291	-1.62199	2.21217	hsa-miR-412-3p
0.03108	0.00315282	4.12298	-1.63074	1.17349		no information
0.03108	0.00315376	4.12277	-1.63105	1.76795	hsa-miR-887-3p
0.03123	0.00317722	-4.11748	-1.63861	-2.53225	hsa-miR-122-5p
0.0313	0.00319337	4.11387	-1.64379	1.5122		no information
0.03133	0.00320584	4.11109	-1.64777	1.2024	hsa-miR-374c-3p
0.03141	0.0032224	4.10742	-1.65303	1.92872		no information
0.03144	0.00324125	-4.10327	-1.65898	-1.2302	hsa-miR-3202
0.03144	0.00324378	4.10271	-1.65977	1.23144		no information
0.03148	0.00325954	4.09926	-1.66472	2.33982	hsa-miR-517-5p
0.03148	0.00326531	4.098	-1.66652	1.32181	hsa-miR-181d-5p
0.0316	0.00328642	4.09342	-1.6731	2.06165		no information
0.03168	0.00330447	-4.08953	-1.67869	-1.23073		no information
0.03177	0.00332299	-4.08555	-1.68439	-1.31423	hsa-miR-4747-5p
0.03196	0.00335177	4.07943	-1.6932	1.85572	hsa-miR-331-3p
0.03474	0.00392799	4.17029	-1.69378	3.26724	hsa-miR-4438
0.03219	0.00338456	4.07252	-1.70313	1.18417	hsa-miR-4766-5p
0.03224	0.00340289	4.06869	-1.70864	1.86068		no information
0.03482	0.00398618	4.15875	-1.70876	1.50936	hsa-miR-579-3p
0.03224	0.00340786	4.06765	-1.71013	3.14172	hsa-miR-1289
0.03227	0.00342038	4.06505	-1.71388	1.97784	hsv1-miR-H2-3p
0.03228	0.0034307	4.06291	-1.71695	1.16521	hsa-miR-4700-5p
0.03242	0.00345461	4.05799	-1.72404	1.49618		no information
0.03246	0.00346834	4.05518	-1.72808	3.21278		no information
0.03268	0.00350902	4.04693	-1.73999	1.10438	hsa-miR-1272
0.03268	0.0035099	4.04675	-1.74024	1.53745	hsa-miR-34c-5p
0.03503	0.00411997	4.13291	-1.74238	2.33975	hsa-miR-4804-5p
0.03292	0.00354477	4.03975	-1.75033	1.09777	hsv1-miR-H7-5p
0.03299	0.00356187	4.03635	-1.75524	1.37283		no information
0.03301	0.00357382	4.03398	-1.75866	1.21213	bkv-miR-B1-3p/jcv-miR-J1-3p
0.03308	0.00359075	4.03064	-1.76348	1.62609		no information
0.03308	0.00359947	4.02893	-1.76595	2.69454	hsa-miR-100-5p
0.03565	0.00429892	4.09973	-1.78568	1.58835	hsa-miR-770-5p
0.03387	0.00369491	-4.01046	-1.79265	-1.42476	hsa-miR-3606-5p
0.0344	0.00376805	3.99665	-1.81265	1.19526	hsa-miR-548ag
0.0344	0.00378787	3.99296	-1.818	1.89483		no information
0.0344	0.00378883	3.99278	-1.81826	1.77774		no information
0.0344	0.00379208	3.99218	-1.81913	1.19209	hsa-miRPlus-G1065-5p
0.03463	0.00383165	3.98487	-1.82972	1.24839	hsa-let-7g-3p
0.03463	0.0038372	3.98385	-1.8312	1.7334		no information
0.03469	0.00385387	-3.98081	-1.83562	-1.18663		no information
0.03474	0.0038811	-3.97586	-1.8428	-1.62042	hsa-miR-125b-1-3p
0.03474	0.00389487	-3.97337	-1.84642	-1.20792	hsa-miR-4653-3p
0.03474	0.00390094	3.97228	-1.84801	2.28301	hsa-miR-199b-5p
0.03474	0.00390746	-3.9711	-1.84971	-1.11427		no information
0.03474	0.00392059	3.96875	-1.85313	1.04984	hsa-miR-4703-3p
0.03474	0.0039263	3.96773	-1.85462	2.43022		no information
0.03482	0.00395515	3.96259	-1.86208	1.49221	hsa-miR-654-3p
0.03482	0.00396456	3.96092	-1.86451	1.47636	hsa-miR-191-5p
0.03482	0.00397099	3.95978	-1.86616	1.46428		no information
0.03482	0.00397999	3.9582	-1.86847	3.75841		no information
0.03495	0.00402976	3.94948	-1.88114	2.21017	hsa-miR-497-5p
0.03495	0.00403053	3.94935	-1.88134	2.20778	hsa-miR-15a-5p
0.03495	0.00403101	3.94927	-1.88146	1.28373	hsa-miR-548as-5p
0.03495	0.00404051	-3.94762	-1.88386	-1.3317	hsa-miR-4484
0.03498	0.00406535	3.94332	-1.89011	2.90186	hsa-miR-218-5p
0.03498	0.00406711	-3.94302	-1.89055	-1.14985		no information
0.03498	0.00407289	3.94202	-1.892	2.14741		no information
0.03502	0.00408851	3.93935	-1.8959	1.09156	hsa-miR-511-5p
0.03503	0.00411913	-3.93412	-1.90351	-1.49327	hsa-miR-491-3p
0.03503	0.0041348	3.93147	-1.90739	1.4228	hsa-miR-3666
0.03503	0.00413684	3.93112	-1.90789	1.10797		no information
0.03503	0.00413896	3.93076	-1.90841	2.47908	hsa-miR-4762-3p
0.03503	0.0041483	3.92919	-1.91071	2.44319	hsa-miR-20a-5p
0.03516	0.00417409	-3.92485	-1.91703	-1.06566	hsa-miR-1284
0.03521	0.0041897	3.92224	-1.92084	1.84712	hsa-miR-410-3p
0.03803	0.00493526	3.9929	-1.92631	1.56134		no information
0.03541	0.00422322	-3.91668	-1.92896	-1.04588		no information
0.03548	0.0042422	3.91355	-1.93353	2.3046	hsa-miR-570-3p
0.03565	0.00430561	3.90319	-1.94866	1.16843	kshv-miR-K12-6-5p
0.03565	0.0043094	3.90258	-1.94956	1.82238	hsa-miR-516a-5p
0.03565	0.00431238	-3.90209	-1.95026	-1.21179		no information
0.03565	0.00431249	-3.90208	-1.95029	-1.05049		no information
0.03587	0.00434894	3.89621	-1.95887	1.12611		no information
0.03626	0.00441335	3.88597	-1.97386	1.2146	hsa-miR-2116-3p
0.03626	0.00441805	3.88523	-1.97494	1.14362		no information
0.03626	0.00443637	3.88234	-1.97916	1.40029	hsa-miRPlus-C1100
0.03626	0.00443792	3.8821	-1.97952	1.09155		no information
0.03639	0.00446399	3.87802	-1.98549	1.28815	hsa-miR-10b-3p
0.03647	0.00448459	3.87482	-1.99018	1.4325	hsa-miR-106b-5p
0.03652	0.00450055	3.87235	-1.9938	1.01912		no information
0.03662	0.00452356	3.86881	-1.999	1.10743		no information
0.03666	0.00454727	3.86517	-2.00433	1.35999	hsa-miR-431-3p
0.03666	0.00456652	3.86224	-2.00864	1.51632	hsa-miR-3678-3p
0.03666	0.00457486	-3.86097	-2.0105	-1.09727	hsa-miR-4475
0.03666	0.00458531	3.85938	-2.01282	2.55672	hsa-miR-195-5p
0.03666	0.00458769	3.85902	-2.01335	1.0532		no information
0.03666	0.00459183	3.8584	-2.01427	1.87811	hsa-miR-4638-3p
0.03666	0.0046011	3.857	-2.01633	1.28236		no information
0.03675	0.00463186	3.85237	-2.02312	2.04785	hsa-miR-4423-3p
0.03675	0.00463302	3.8522	-2.02337	1.12089	hsa-miR-4299
0.03693	0.00466561	-3.84733	-2.03052	-1.18007		no information
0.03705	0.00469152	3.84349	-2.03616	1.20897		no information
0.03738	0.00474369	-3.83583	-2.04743	-1.30281	hsa-miR-5681b
0.03748	0.00477256	3.83162	-2.05361	1.7722	hsa-miR-3199
0.03748	0.00477831	3.83079	-2.05484	1.79101	hsa-miR-224-5p
0.03748	0.00478798	3.82939	-2.0569	2.46848		no information
0.04586	0.00706387	3.9475	-2.06251	2.18647	hsa-miR-621
0.03771	0.00483144	3.82314	-2.06611	1.46721	hsa-miR-744-3p
0.03771	0.00483896	3.82206	-2.06769	1.45871		no information
0.0379	0.00488009	3.8162	-2.07632	1.07544		no information
0.0379	0.00488415	-3.81563	-2.07716	-1.03718	hsv1-miR-H7-3p
0.03803	0.00492953	3.80923	-2.08659	1.46121	hsa-miR-4670-3p
0.03803	0.00493342	3.80869	-2.08739	1.77947	hsa-miR-548ab
0.03803	0.00494458	3.80713	-2.08969	1.36096	kshv-miR-K12-11-5p
0.03812	0.00496981	3.80361	-2.09488	1.72779		no information
0.03812	0.0049839	-3.80166	-2.09776	-2.13758	hsa-miR-375
0.03812	0.00498833	3.80104	-2.09867	1.21411		no information
0.03822	0.00501203	3.79777	-2.10349	1.58179		no information
0.03829	0.00503246	3.79496	-2.10764	1.68201	hsa-miR-376b-5p/hsa-miR-376c-5p
0.03855	0.00507746	3.78882	-2.11671	1.1929	hsa-miR-606
0.03876	0.00511629	3.78357	-2.12447	1.26935	hsa-miR-423-3p
0.03891	0.00514754	3.77937	-2.13067	2.46728	hsa-miR-202-3p
0.04269	0.00605595	-3.83691	-2.1348	-1.92587		no information
0.03931	0.00521033	3.77102	-2.14302	1.97597		no information
0.03937	0.0052303	3.76838	-2.14691	1.63629	hsa-miR-4464
0.0395	0.00526743	3.76351	-2.15412	1.18271	hsa-miR-548aa/hsa-miR-548t-3p
0.0395	0.00526966	3.76322	-2.15455	1.63966	hsa-miR-136-3p
0.03968	0.00530518	3.7586	-2.16139	1.76255	hsa-miR-4689
0.04035	0.00541458	3.74457	-2.18217	1.11444	hsa-miR-3926
0.04035	0.00541701	3.74426	-2.18263	1.15264		no information
0.04049	0.00545815	3.73907	-2.19033	1.41694	hsa-miR-3170
0.04049	0.00545896	3.73897	-2.19048	1.28284	hsa-miR-3912-3p
0.04105	0.00554623	3.72809	-2.20663	1.19349	hsa-miR-4524a-3p
0.04109	0.00556972	3.72519	-2.21093	1.17981	hsa-miR-3918
0.04109	0.00557489	3.72455	-2.21188	2.4081		no information
0.0413	0.0056223	-3.71875	-2.2205	-1.14755	hsa-miR-4639-3p
0.04458	0.00658827	3.77348	-2.22063	1.50632	hsa-miR-4693-5p
0.0413	0.00562652	3.71823	-2.22126	1.02236		no information
0.0413	0.00564535	3.71594	-2.22466	1.48863	hsa-miR-4280
0.0413	0.00565035	3.71534	-2.22556	1.56253		no information
0.0413	0.00566151	3.71399	-2.22757	1.45017		no information
0.04153	0.00570504	-3.70874	-2.23537	-1.12462		no information
0.04169	0.00573885	3.7047	-2.24138	1.35791		no information
0.04207	0.00581011	3.69626	-2.25394	1.60644	hsa-miR-19a-3p
0.04207	0.00582063	3.69502	-2.25578	1.51335		no information
0.04207	0.00582641	3.69434	-2.25679	1.46059	hsa-miR-223-3p
0.0421	0.00584201	3.69251	-2.25951	1.59276		no information
0.04219	0.00586663	3.68964	-2.26379	1.6803	hsa-miR-155-3p
0.04232	0.00589683	3.68613	-2.26902	1.27009		no information
0.04243	0.00593383	3.68186	-2.27538	1.08048	hsa-miR-4790-3p
0.04243	0.00593646	3.68156	-2.27583	1.76959	ebv-miR-BART4-3p
0.0425	0.0059581	3.67907	-2.27953	1.48394	hsa-miR-132-3p
0.04263	0.00598891	3.67555	-2.28478	1.6394	hsa-miR-4519
0.04269	0.00602281	3.6717	-2.29052	1.314	hsa-miR-300
0.04269	0.00604092	3.66965	-2.29358	1.55196	hsa-miR-4666a-5p
0.04269	0.00605176	3.66843	-2.2954	1.21071		no information
0.04269	0.00605778	3.66775	-2.29642	2.7291		no information
0.04309	0.00612589	3.66013	-2.30779	1.32431	hsa-miR-604
0.04346	0.00619033	3.653	-2.31843	1.38412		no information
0.04386	0.00626022	3.64536	-2.32985	1.21151		no information
0.04411	0.00631973	3.63892	-2.33947	1.27527	hsa-miR-3668
0.04411	0.00634554	3.63615	-2.34362	1.05194	hsa-miR-5685
0.04411	0.00635178	3.63548	-2.34462	2.3417	hsa-miR-4668-3p
0.04411	0.00635668	-3.63496	-2.3454	-1.04574	kshv-miR-K12-8-5p
0.04411	0.00635823	3.63479	-2.34565	1.25137	hsa-miR-4298
0.04433	0.00640337	3.62999	-2.35284	1.04036		no information
0.04435	0.00641866	3.62836	-2.35527	1.467		no information
0.05355	0.00949085	3.70028	-2.35596	1.98415		no information
0.04437	0.00643287	-3.62686	-2.35752	-1.43166		no information
0.04441	0.0064763	3.62229	-2.36436	1.267	hsa-miR-197-3p
0.04441	0.00647658	3.62226	-2.3644	2.26258	hsa-miR-3973
0.04441	0.00647691	3.62223	-2.36445	1.94045	hsa-miR-3927-3p
0.0445	0.00650217	3.61958	-2.36841	1.27069	hsa-miR-4325
0.04458	0.00654975	-3.61464	-2.37582	-1.79239		no information
0.04458	0.00656461	3.6131	-2.37813	1.50234	hsa-let-7f-2-3p
0.04458	0.00658553	3.61094	-2.38136	2.09891	hsa-miR-4717-3p
0.04458	0.00659359	3.61011	-2.38261	1.48907	hsa-miR-27b-5p
0.04458	0.00661147	-3.60827	-2.38536	-1.55535	hsa-miR-2278
0.04458	0.00661424	3.60799	-2.38579	1.14271	hsa-miR-342-5p
0.04458	0.00662875	3.6065	-2.38801	1.12103	hsa-miR-1256
0.04458	0.006638	-3.60556	-2.38943	-1.0825	hsa-miR-665
0.04458	0.00664937	3.6044	-2.39117	1.65028		no information
0.04458	0.006653	3.60403	-2.39172	1.09726	ebv-miR-BART14-5p
0.04469	0.00669644	3.59962	-2.39834	1.0254		no information
0.04469	0.00669722	3.59954	-2.39846	1.26309	hsa-miR-1304-3p
0.04469	0.00671325	3.59792	-2.40089	0.94814	hsa-miR-5582-5p
0.04469	0.00671932	3.5973	-2.40181	0.987385	hsa-miR-5689
0.0448	0.00674934	3.59428	-2.40634	1.77831	hsa-miR-4254
0.04482	0.00676505	-3.59271	-2.4087	-1.47693	hsa-miR-3183
0.04491	0.00679081	3.59014	-2.41256	1.5338	hsa-miR-3674
0.04506	0.00682671	3.58657	-2.41792	2.00752		no information
0.04518	0.00685773	3.5835	-2.42253	1.82717		no information
0.0484	0.00804421	3.62491	-2.42395	2.26228	hsa-miR-4751
0.04565	0.0069507	3.57439	-2.43621	1.0961	hsa-miR-503-3p
0.04565	0.00695424	3.57405	-2.43673	1.20383		no information
0.04883	0.00815738	3.6146	-2.43817	2.64578	hsa-miR-548aq-5p
0.0489	0.00818164	3.61241	-2.4412	1.84269	hsa-miR-4720-5p
0.04577	0.00699303	3.57028	-2.44238	1.3516		no information
0.04577	0.00699879	3.56973	-2.44322	1.54439	hsa-miR-4515
0.04585	0.00702461	3.56724	-2.44696	1.09463	hsa-miR-616-3p
0.04586	0.00706947	3.56294	-2.45343	1.23151	hsa-miR-4731-5p
0.04586	0.00708049	3.56189	-2.45501	1.29446		no information
0.04586	0.00708231	3.56171	-2.45527	1.30105	hsa-miR-363-5p
0.04586	0.00710091	3.55994	-2.45793	1.08337	hsa-miR-3152-3p
0.04586	0.00711395	3.5587	-2.4598	1.62589	hsa-miR-588
0.04586	0.00711962	3.55817	-2.46061	1.39523	hsa-miR-365a-5p
0.04586	0.00713443	3.55676	-2.46272	1.51374	hsa-miR-1537-3p
0.04586	0.00714178	3.55607	-2.46376	1.20383	hsa-miR-3661
0.04596	0.00717013	3.55339	-2.46779	0.941369		no information
0.04601	0.00719115	-3.55142	-2.47076	-0.98079		no information
0.04607	0.00721449	3.54923	-2.47405	1.74158	hsa-miR-138-1-3p
0.0461	0.00723215	3.54758	-2.47654	1.05484		no information
0.04627	0.00728784	3.54241	-2.48433	1.10326	hsa-miR-643
0.04627	0.00729301	3.54193	-2.48505	1.1043	hsa-miR-4270
0.04627	0.0073055	3.54078	-2.48678	1.10435	hsa-miR-3160-5p
0.04627	0.00730994	-3.54037	-2.4874	-0.976519		no information
0.04648	0.00738975	-3.53305	-2.49843	-1.0656	hsa-miR-5696
0.04648	0.00742382	3.52995	-2.5031	1.75649	hsa-miR-4262
0.04648	0.0074313	3.52927	-2.50412	1.25658		no information
0.04648	0.0074415	3.52835	-2.50552	1.49794	hsa-miR-544a
0.04648	0.00744338	3.52818	-2.50577	0.945969		no information
0.04648	0.00745356	3.52726	-2.50716	1.82557	hsa-miR-4252
0.04648	0.00746025	3.52666	-2.50807	1.65278		no information
0.04648	0.00749537	3.52349	-2.51284	1.58157	hsa-miR-3163
0.04648	0.00749558	3.52347	-2.51287	1.16157		no information
0.04648	0.00749713	3.52334	-2.51308	1.36775	hsa-miR-367-3p
0.04648	0.00749714	3.52333	-2.51308	1.98179	hsa-miR-4653-5p
0.04648	0.00750172	3.52292	-2.5137	1.74695	hsa-miR-4697-5p
0.04668	0.00754768	-3.51881	-2.5199	-1.09823		no information
0.04677	0.00757547	3.51634	-2.52363	0.956525	hsa-miR-4796-5p
0.04693	0.0076139	3.51294	-2.52877	1.04113		no information
0.04697	0.0076339	-3.51117	-2.53143	-2.23906		no information
0.04753	0.0077375	3.50211	-2.54511	1.68516	hsa-miR-299-3p
0.04761	0.00776426	3.49979	-2.54862	1.31529	hsa-miR-656-3p
0.05234	0.00914886	3.5304	-2.55489	2.06234	hsa-miR-1245b-5p
0.04788	0.00783597	3.49362	-2.55795	1.35166		no information
0.04788	0.00783645	3.49358	-2.55801	1.67154	hsa-miR-526b-5p
0.0481	0.0078858	3.48936	-2.56438	1.50387	hsa-miR-1271-3p
0.04823	0.00792859	3.48573	-2.56987	1.17337	hsa-miR-550b-3p
0.04823	0.00793441	3.48524	-2.57062	2.69099	hsa-miR-454-3p
0.0484	0.0079911	-3.48047	-2.57784	-1.08946	hsa-miR-4436b-5p
0.0484	0.00800928	-3.47894	-2.58015	-1.04816	hsa-miR-4306
0.0484	0.00801203	-3.47871	-2.58049	-1.30099	hsa-miR-204-3p
0.0484	0.00801997	-3.47805	-2.5815	-1.1966		no information
0.0484	0.00804092	3.4763	-2.58415	1.19563		no information
0.04867	0.00810292	3.47115	-2.59194	1.92777	hsa-miR-99a-5p
0.04883	0.00815321	3.46701	-2.59821	2.16162	ebv-miR-BART3-3p
0.05382	0.00956818	3.4977	-2.60047	1.42733	hsa-miR-4663
0.04896	0.00820598	3.46268	-2.60476	1.10059		control
0.04897	0.00822225	3.46136	-2.60677	1.21707	hsa-miR-584-3p
0.049	0.00824043	3.45988	-2.60901	1.192	hsa-miR-379-3p
0.04952	0.00834206	-3.45168	-2.62144	-0.934528		no information
0.04965	0.00837841	3.44877	-2.62585	1.96262	hsa-miR-99b-5p
0.04982	0.00842111	-3.44537	-2.631	-1.01948		no information
0.0499	0.00844809	3.44323	-2.63425	1.65927	hsa-miR-5681a
0.04996	0.00847204	3.44134	-2.63712	1.51862	hsa-miR-4752
0.05015	0.00851952	3.4376	-2.64278	2.08312	hsa-miR-889-3p
0.05019	0.00853972	3.43602	-2.64519	1.91739	hsa-miR-3908
0.0502	0.00856621	3.43395	-2.64832	1.17016	hsa-miR-371a-3p
0.0502	0.0085708	-3.43359	-2.64887	-0.994646		no information
0.05167	0.00883588	3.41327	-2.67974	1.08337		no information
0.05174	0.00888349	3.40968	-2.68519	1.41589	hsa-miR-587
0.05174	0.00889503	3.40882	-2.6865	1.41028	hsa-miR-708-5p
0.05174	0.00890537	3.40804	-2.68768	1.02316		no information
0.05174	0.00890582	3.40801	-2.68773	1.10439		no information
0.05185	0.0089405	3.40542	-2.69167	1.21359		no information
0.05194	0.00896961	3.40325	-2.69496	1.20514		no information
0.05206	0.00901456	-3.39992	-2.70003	-1.06568		no information
0.05206	0.00902024	3.3995	-2.70067	1.20155	hsa-miR-505-3p
0.05208	0.00903783	3.39821	-2.70264	1.57354	hsa-miR-106a-5p
0.0522	0.00907316	-3.39561	-2.70659	-1.47209	hsv1-miR-H4-3p
0.05234	0.00911504	3.39254	-2.71126	1.4106	hsa-miR-4721
0.05234	0.00915471	3.38965	-2.71566	2.19891		control
0.05234	0.00915676	-3.3895	-2.71588	-1.10121	hsa-miR-3937
0.05246	0.00919362	-3.38683	-2.71995	-1.06324		no information
0.0526	0.0092356	3.3838	-2.72457	1.04286	hcmv-miR-UL36-5p
0.0526	0.00924757	3.38294	-2.72588	1.14746		no information
0.05296	0.00933732	-3.37651	-2.73566	-1.00403	hsa-miR-3972
0.05296	0.00935852	3.37501	-2.73796	1.19087		control
0.05296	0.00936226	3.37474	-2.73836	1.00615		no information
0.05296	0.00936974	-3.37421	-2.73917	-1.15111	hsa-miR-4640-3p
0.05382	0.00956818	3.36029	-2.76039	1.3523	hsa-miR-649
0.05382	0.00958384	3.3592	-2.76205	1.25535		no information
0.05387	0.00960846	3.3575	-2.76465	1.09085		no information
0.0539	0.00963366	3.35576	-2.7673	1.10265	mcv-miR-M1-5p
0.0539	0.00965746	3.35412	-2.76979	1.07266	hsa-miR-1287-5p
0.0539	0.00965849	3.35405	-2.7699	1.23976	hsa-miR-4477b
0.0543	0.00974564	-3.34809	-2.77899	-1.0552	hsa-miR-4654
0.05434	0.00980196	3.34427	-2.78483	1.59928	hsa-miR-5688
0.05434	0.00980573	3.34401	-2.78522	1.17521	hsa-miR-5583-5p
0.05434	0.00980624	3.34398	-2.78527	0.986862	hsa-miR-20b-3p
0.05434	0.00981378	3.34347	-2.78605	1.94461	hsa-let-7e-3p
0.06096	0.0115956	3.35872	-2.79573	2.05767	hsa-miR-3691-3p
0.05483	0.00991805	-3.33646	-2.79674	-1.12369		no information
0.05488	0.00994371	3.33475	-2.79936	0.964677	hsa-miR-3648
0.05571	0.0101097	3.32379	-2.81611	1.86563	hsa-miR-140-5p
0.05575	0.0101329	3.32227	-2.81843	1.85482	hsa-miR-138-2-3p
0.05578	0.0101529	3.32096	-2.82042	1.45211	hsa-miR-5587-5p
0.05594	0.0101978	3.31804	-2.82489	0.960399	hsa-miR-3690
0.05684	0.0103791	3.30639	-2.84271	1.20078		no information
0.06239	0.0121621	3.32452	-2.84414	1.36735	hsa-miR-3159
0.05711	0.0104444	-3.30224	-2.84905	-0.898508		no information
0.05735	0.0105032	3.29853	-2.85472	1.32594	hsa-miR-548ar-5p
0.05779	0.0106006	3.29244	-2.86406	1.41715	hsa-miR-637
0.05794	0.0106591	3.2888	-2.86962	1.06936		no information
0.05794	0.0106941	-3.28664	-2.87293	-1.11081	hsa-miR-4513
0.05794	0.0107069	3.28585	-2.87414	0.907334	hsa-miR-221-5p
0.05794	0.0107081	3.28577	-2.87426	1.27313	hsa-miR-4693-3p
0.05794	0.0107185	-3.28513	-2.87524	-1.25578	hsa-miR-3158-3p
0.05794	0.0107336	3.28421	-2.87666	1.5745	hsa-miR-128-3p
0.07056	0.0160149	3.28026	-2.87756	1.85762		no information
0.05794	0.0107474	-3.28336	-2.87796	-0.965321		no information
0.05794	0.0107723	3.28183	-2.8803	1.11907	hsa-miR-493-3p
0.05794	0.0107766	3.28157	-2.8807	0.873482		no information
0.058	0.0108026	3.27998	-2.88313	1.03834		no information
0.0677	0.0147159	-3.34674	-2.88314	-1.48394	hsa-miR-548ar-3p
0.05827	0.0108694	3.27591	-2.88936	1.00317	hsv1-miR-H5-5p
0.05827	0.010886	3.2749	-2.89091	0.930729	hsa-miR-612
0.05827	0.0109024	3.27391	-2.89243	2.24778	hsa-miR-3139
0.05873	0.0110059	-3.26768	-2.90198	-0.930207	hsa-miR-371b-3p
0.05877	0.0110306	3.2662	-2.90424	1.06047		no information
0.05891	0.0110723	3.26372	-2.90806	1.00058		no information
0.05968	0.0112335	3.2542	-2.92265	0.841018	hsa-miR-3935
0.06043	0.0113931	3.24491	-2.93691	0.907664	hsv1-miR-H15
0.06046	0.0114157	3.24361	-2.9389	1.56914	hsa-miR-5680
0.06048	0.0114354	3.24247	-2.94065	1.47472		control
0.07813	0.0196089	3.32735	-2.94137	1.61456	hsa-miR-4666b
0.06075	0.0115037	3.23855	-2.94666	2.0228	hsa-miR-4797-3p
0.06082	0.0115343	3.23681	-2.94934	0.942846		no information
0.06094	0.0115754	3.23447	-2.95293	0.863312	hsa-miR-1286
0.06098	0.011622	-3.23183	-2.95699	-0.859363		no information
0.06098	0.0116334	3.23118	-2.95798	1.08407	hcmv-miR-UL70-5p
0.06128	0.0117084	3.22696	-2.96447	0.879087		no information
0.06148	0.0117964	-3.22204	-2.97202	-0.937105		no information
0.06148	0.0117967	3.22202	-2.97205	1.91437		no information
0.06148	0.0117988	3.22191	-2.97223	1.0773	hsa-miR-4705
0.0616	0.0118388	3.21968	-2.97564	1.23826	hsa-miR-3622b-5p
0.06178	0.0118916	3.21676	-2.98014	1.54102	hsa-miR-4520-2-3p
0.0619	0.0119361	-3.21431	-2.98391	-0.887566	ebv-miR-BART16
0.0619	0.01196	3.213	-2.98592	1.48665		no information
0.0619	0.0119678	3.21257	-2.98658	1.1488	hsa-miR-1262
0.06196	0.0119958	3.21103	-2.98894	1.23863	hsa-miR-206
0.06218	0.0120557	3.20776	-2.99396	1.85343	hsa-miR-145-5p
0.0623	0.0120968	-3.20553	-2.9974	-0.886577	hsa-miR-5010-3p
0.06234	0.0121223	-3.20415	-2.99952	-1.00067		no information
0.06239	0.0121674	3.20171	-3.00327	2.90327	hsa-miR-190a-5p
0.07568	0.0181828	3.18143	-3.00421	1.57519		no information
0.06244	0.0121958	3.20019	-3.00562	1.12156		no information
0.06253	0.0122309	3.1983	-3.00852	1.8764		control
0.06255	0.0122696	-3.19623	-3.0117	-0.883629	hsa-miR-5187-5p
0.06255	0.0122704	3.19619	-3.01177	1.4802		no information
0.06255	0.0122869	3.1953	-3.01313	0.906522	hsv1-miR-H5-3p
0.06281	0.0123561	-3.19162	-3.0188	-1.03284	kshv-miR-K12-10b
0.06287	0.0123857	3.19005	-3.02121	1.91758	hsa-miR-4735-3p
0.06288	0.0124117	3.18868	-3.02332	2.05137	hsa-miR-23c
0.06288	0.0124431	3.18702	-3.02587	1.10113	hsa-miR-29a-5p
0.06288	0.0124519	3.18656	-3.02658	1.23826		no information
0.06288	0.0124762	3.18529	-3.02854	1.37066	hsa-miR-142-3p
0.06288	0.0124831	3.18492	-3.02911	1.07431	hsa-miR-5695
0.06288	0.0125068	-3.18368	-3.03102	-0.82293		no information
0.06288	0.0125119	3.18341	-3.03143	1.46428	hsa-miR-4757-5p
0.06294	0.0125591	3.18094	-3.03523	1.00447		no information
0.06294	0.0125673	3.18052	-3.03588	1.99619	hsa-miR-103a-2-5p
0.06294	0.0125776	-3.17998	-3.03671	-0.903128	hsa-miR-1908-5p
0.06299	0.0126045	-3.17858	-3.03886	-0.917742	hsa-miR-335-3p
0.06318	0.012684	3.17446	-3.0452	1.37962	hsa-miR-802
0.06318	0.0126967	-3.17381	-3.04621	-1.01556	hsa-miR-4732-3p
0.06318	0.0127107	3.17309	-3.04732	1.12721		no information
0.06318	0.0127211	3.17255	-3.04815	1.17379	hsa-miR-4277
0.06318	0.012733	-3.17194	-3.04909	-1.63546		no information
0.06328	0.0127699	-3.17005	-3.05201	-0.95609		no information
0.06343	0.0128204	-3.16747	-3.05598	-0.970606	hsa-miRPlus-A1073
0.06343	0.0128375	-3.16659	-3.05733	-1.07981		no information
0.06345	0.0128586	3.16552	-3.05898	1.3063		no information
0.06356	0.0128984	-3.16349	-3.0621	-1.0431		no information
0.06364	0.0129332	-3.16174	-3.06481	-0.892238	hsv2-miR-H7-3p
0.06369	0.0129616	3.1603	-3.06702	0.980591	hsa-miR-549a
0.06382	0.0130316	3.15678	-3.07245	1.07819	hsa-miR-5708
0.06382	0.0130639	3.15516	-3.07495	1.67109		no information
0.06382	0.0130709	3.15481	-3.07548	1.06908	hsa-let-7c-3p
0.06382	0.0130753	3.15459	-3.07582	1.19411	hsa-miR-571
0.06382	0.013077	3.1545	-3.07596	0.944725	hsa-miR-4648
0.06403	0.013139	3.15141	-3.08072	0.930902	ebv-miR-BART2-5p
0.06406	0.0131638	3.15018	-3.08262	1.15955	hsa-miR-4691-3p
0.0641	0.0131902	3.14887	-3.08464	3.22351	hsa-miR-133a-5p
0.06452	0.013304	3.14326	-3.09329	1.14981		no information
0.06452	0.0133135	3.14279	-3.09401	0.897881	hsa-miR-3934-5p
0.06458	0.0133441	3.14129	-3.09632	1.15651		no information
0.06498	0.0134533	-3.13597	-3.10453	-1.39184		no information
0.06498	0.0134634	3.13548	-3.10529	1.21863	hsa-miR-4759
0.06513	0.0135194	3.13277	-3.10947	1.66715		control
0.06513	0.01353	-3.13226	-3.11026	-0.95329	hsv2-miR-H10
0.06521	0.0135647	3.13059	-3.11283	1.93754		no information
0.06527	0.0135959	3.12909	-3.11515	1.07942		no information
0.0655	0.0136812	-3.12501	-3.12145	-1.08236	hsa-miR-4731-3p
0.0655	0.0137248	3.12293	-3.12465	1.0725	hsa-miR-3130-5p
0.0655	0.0137447	3.12198	-3.12611	0.899923	hsa-miR-1251-3p
0.0655	0.0137486	3.1218	-3.12639	1.13731	hcmv-miR-UL112-3p
0.0655	0.0137543	3.12153	-3.12681	1.15778	hsa-miR-3591-3p
0.0655	0.0137544	-3.12152	-3.12682	-1.03262	hsa-miR-4459
0.06557	0.0137882	-3.11992	-3.12929	-1.07506	hsa-miR-5581-3p
0.0656	0.0138373	-3.1176	-3.13287	-1.49473	hsa-miR-767-5p
0.0656	0.0138382	3.11757	-3.13293	1.70022	hsa-miR-3617-5p
0.0656	0.0138644	-3.11633	-3.13484	-0.883264		no information
0.0656	0.0138682	3.11615	-3.13511	1.17467	hsa-miR-4469
0.06594	0.0139823	3.11081	-3.14335	0.865661	hsa-miR-3922-5p
0.06594	0.0139932	3.1103	-3.14414	0.957663	hsa-miR-5006-5p
0.06594	0.0140378	3.10823	-3.14735	1.94476		no information
0.06594	0.0140623	3.10709	-3.1491	1.67608		no information
0.06594	0.0140746	-3.10652	-3.14998	-1.64636		no information
0.06594	0.0140751	3.1065	-3.15002	0.91318	hsa-miR-2681-5p
0.06594	0.0140843	3.10607	-3.15067	1.92211	hsa-miR-130a-3p
0.06594	0.0140895	-3.10583	-3.15104	-0.875917		no information
0.06615	0.0141538	3.10287	-3.15562	0.8891	hsa-miR-4744
0.06638	0.0142225	3.09971	-3.1605	1.77102	hsa-miR-409-3p
0.0665	0.0142668	3.09769	-3.16363	0.928382	kshv-miR-K12-1-3p
0.06697	0.0143866	3.09224	-3.17204	0.985322	hsa-miR-4675
0.06725	0.0144816	3.08796	-3.17865	1.16075	hsa-miR-3177-3p
0.06725	0.0144974	-3.08725	-3.17975	-0.996972	hsa-miR-4749-3p
0.06725	0.0145119	3.0866	-3.18076	0.98151	hsa-miR-4282
0.06725	0.0145227	3.08611	-3.18151	1.8924		no information
0.06728	0.014548	3.08498	-3.18326	1.67294	hsa-miR-2053
0.06737	0.014585	3.08333	-3.18581	1.13095	hsa-miR-4276
0.06761	0.0146579	3.08008	-3.19083	0.849673	hsv1-miR-H6-5p
0.06765	0.0146849	3.07889	-3.19267	2.11877	hsa-miR-223-5p
0.06772	0.0147862	3.07442	-3.19958	1.70155	hsa-miR-26a-5p
0.06772	0.0148022	3.07371	-3.20067	1.59465		control
0.06772	0.0148037	3.07365	-3.20078	1.19816	hsa-miR-3155a
0.06772	0.0148379	-3.07215	-3.20309	-1.17837		no information
0.06772	0.014839	-3.0721	-3.20317	-0.988122	ebv-miR-BART19-5p
0.06772	0.0148643	-3.07099	-3.20488	-0.901861	hsv2-miR-H24
0.06772	0.0148677	3.07084	-3.20511	2.51698	hsa-miR-374a-3p
0.06772	0.0148737	-3.07058	-3.20552	-1.06242		no information
0.06772	0.0148905	3.06985	-3.20665	2.53133	hsa-miR-3658
0.06781	0.0149301	3.06812	-3.20932	0.932019		no information
0.08391	0.0223895	3.02173	-3.21167	1.49881		no information
0.0682	0.0150353	3.06356	-3.21638	1.04497	hsa-miR-3197
0.069	0.0152554	3.05412	-3.23098	1.35259		no information
0.069	0.0152676	3.0536	-3.23178	1.19127		no information
0.069	0.0152701	-3.05349	-3.23195	-0.84611	hsa-miR-4795-3p
0.06937	0.0153727	3.04914	-3.23868	0.954307		no information
0.06949	0.0154183	3.04722	-3.24165	1.2451		control
0.06961	0.0154648	3.04527	-3.24468	1.21609	hsa-miR-545-3p
0.06984	0.0155465	-3.04185	-3.24997	-0.830698	hsa-miR-4787-3p
0.06984	0.0155592	-3.04132	-3.25078	-0.948583		no information
0.08608	0.0233338	2.99036	-3.25281	1.41113	hsa-miR-4452
0.06984	0.0155926	-3.03993	-3.25294	-1.7975	hsa-miR-876-5p
0.06984	0.0155939	-3.03988	-3.25302	-0.931406		no information
0.06985	0.0156271	3.0385	-3.25516	0.978204	hsa-miR-4749-5p
0.06985	0.0156365	-3.0381	-3.25576	-0.876073	hsa-miR-4521
0.07019	0.015757	3.03313	-3.26347	1.54534		no information
0.07019	0.0157665	3.03273	-3.26408	1.53806		no information
0.07019	0.015793	3.03165	-3.26576	1.16892	hsa-miR-548i
0.07019	0.0157935	3.03162	-3.2658	0.915194		no information
0.07019	0.0158112	-3.0309	-3.26692	-0.895801		no information
0.07021	0.0158359	3.02989	-3.26849	1.43633	hsa-miR-1185-1-3p
0.07023	0.0158608	3.02887	-3.27007	0.980264	hsa-miR-4269
0.0704	0.0159338	-3.02589	-3.27467	-1.17199	hsa-miR-3150b-5p
0.0704	0.0159389	-3.02568	-3.275	-1.47936	hsa-miR-873-5p
0.07043	0.0159655	3.0246	-3.27667	1.36443	hsa-miR-4524b-3p
0.08767	0.0239124	2.9718	-3.2772	1.46789	hsa-miR-4633-3p
0.07056	0.0160527	3.02107	-3.28214	1.34603	hsa-miR-598-3p
0.07056	0.0160538	3.02103	-3.2822	3.26804	hsa-miR-4770
0.07061	0.0160853	3.01976	-3.28418	1.04401	hcmv-miR-US5-2-3p
0.08816	0.0241967	2.96286	-3.28897	1.74582	hsa-miR-499b-3p
0.07113	0.0162234	-3.01422	-3.29275	-0.91907		no information
0.07114	0.0162457	3.01333	-3.29413	0.970739	hsa-miR-5087
0.0714	0.016343	3.00946	-3.30012	1.28893	hsa-miR-3683
0.0714	0.0163457	3.00936	-3.30029	1.85301	hsa-miR-10b-5p
0.07158	0.0164069	3.00694	-3.30404	1.4117		no information
0.07169	0.0164534	3.0051	-3.30688	1.06814	hsa-miR-3916
0.07171	0.0164844	3.00388	-3.30876	1.04329	hsa-miR-550a-3p
0.07171	0.0165342	3.00193	-3.31179	1.00615	hsa-miR-4774-3p
0.07171	0.0165515	3.00125	-3.31284	1.62609	hsa-miR-4786-3p
0.07171	0.0165539	3.00116	-3.31298	1.73052	hsa-miR-4328
0.07171	0.0165592	3.00096	-3.3133	1.08422		no information
0.0719	0.0166528	-2.99731	-3.31896	-1.29448		no information
0.0719	0.0166622	2.99694	-3.31952	1.68814		no information
0.0719	0.0166637	2.99688	-3.31961	1.14147	hsa-miR-5703
0.07204	0.0167165	-2.99484	-3.32278	-0.986409	hsa-miR-940
0.07207	0.0167474	-2.99364	-3.32464	-1.23876	Hy3
0.07207	0.0167754	-2.99256	-3.32631	-1.13276	ebv-miR-BART17-3p
0.07207	0.0167852	2.99218	-3.3269	1.17477	hsa-miR-3121-3p
0.07224	0.0168443	-2.98991	-3.33042	-1.05224		no information
0.07225	0.0168685	2.98898	-3.33187	1.92196		control
0.07252	0.0169508	2.98583	-3.33675	1.13095	hsa-miR-3166
0.07255	0.016992	2.98426	-3.33918	1.02949	hsa-miR-4510
0.07255	0.0170003	-2.98395	-3.33967	-0.964283		no information
0.07255	0.0170205	2.98318	-3.34085	1.05192		no information
0.07287	0.017116	-2.97956	-3.34647	-0.848568		no information
0.07295	0.0171541	2.97813	-3.34869	2.38903		no information
0.07317	0.0172263	2.97541	-3.3529	1.53447		no information
0.07338	0.0172997	2.97266	-3.35716	1.39761		no information
0.07338	0.0173206	-2.97188	-3.35837	-1.52245	hsa-miR-148a-3p
0.07338	0.0173553	2.97059	-3.36038	0.93607	hsa-miR-1255b-5p
0.07338	0.0173682	2.97011	-3.36112	0.804636	hsa-miR-3123
0.07338	0.0173798	2.96968	-3.36179	1.84138	hsa-miR-23b-3p
0.09205	0.0260701	-2.90663	-3.36316	-1.5438	hsa-miR-556-5p
0.0734	0.0174067	-2.96868	-3.36334	-1.70134		no information
0.07392	0.0175496	2.9634	-3.37153	1.45115		no information
0.07403	0.017597	2.96166	-3.37423	1.26078		no information
0.07428	0.0176968	2.958	-3.3799	2.10076	hsa-miR-135b-5p
0.07428	0.017699	2.95793	-3.38002	0.869244	hsa-miR-3126-5p
0.07476	0.0178428	2.9527	-3.38812	0.89884	hsa-miR-4330
0.07476	0.0178553	-2.95225	-3.38883	-0.820349	ebv-miR-BART8-3p
0.07531	0.018008	2.94675	-3.39736	1.15233		no information
0.07531	0.0180299	-2.94597	-3.39857	-1.35041	hsa-miR-3064-5p
0.07548	0.0181101	-2.94311	-3.40302	-1.05271	kshv-miR-K12-9-5p
0.07548	0.0181122	2.94303	-3.40313	1.02464	hsa-miR-670-5p
0.07569	0.0182149	2.93938	-3.40879	0.791459	hsa-miR-4762-5p
0.07569	0.0182339	2.93871	-3.40984	1.0147	hsa-miR-485-5p
0.07569	0.0182534	2.93802	-3.4109	1.17678	hsa-miR-203b-3p
0.07569	0.0183065	2.93615	-3.41381	1.40997	hsa-miR-151a-5p
0.07569	0.0183151	-2.93585	-3.41428	-0.880093	hsa-miR-4274
0.07569	0.0183295	2.93534	-3.41507	1.10265	hsv2-miR-H4-3p
0.07569	0.0183346	2.93516	-3.41535	0.995094		no information
0.07603	0.0184389	-2.9315	-3.42102	-1.33885	hsa-miR-1914-3p
0.07609	0.0184742	-2.93027	-3.42294	-1.00165	hsa-miR-4714-5p
0.07657	0.0186202	-2.9252	-3.43081	-0.76742		no information
0.07657	0.018634	2.92472	-3.43155	0.981759	hsa-miR-302a-3p
0.07671	0.0186907	2.92276	-3.43459	1.58216	hsa-miR-3180-3p
0.07686	0.0187475	2.92081	-3.43763	0.944417	hsa-miR-1909-3p
0.07695	0.0187911	2.91931	-3.43995	2.12472	hsa-miR-32-5p
0.07705	0.0188372	-2.91773	-3.4424	-1.17732		no information
0.07715	0.0188838	2.91614	-3.44487	1.03355	hsa-miR-646
0.07719	0.0189163	2.91503	-3.44659	1.19669		no information
0.07731	0.0189883	2.91259	-3.45039	1.37192	hsa-miR-4761-5p
0.07731	0.0189887	2.91257	-3.45042	1.36655	hsa-miR-197-5p
0.07747	0.0190506	2.91048	-3.45367	1.29466		no information
0.07758	0.0191454	2.90728	-3.45863	1.11877	hsa-miR-4999-5p
0.07758	0.01915	2.90713	-3.45887	1.82778	hsa-miR-26b-5p
0.07758	0.0191508	2.9071	-3.45891	0.977193		no information
0.07758	0.0191653	2.90661	-3.45967	1.10971	hsa-miR-1283
0.0778	0.0192401	2.9041	-3.46356	2.32927		no information
0.07788	0.0192835	-2.90265	-3.46582	-1.73816	hsa-miR-4253
0.078	0.0193337	2.90098	-3.46841	1.51878	hsa-miR-4777-3p
0.07803	0.0193788	2.89948	-3.47074	0.799795	hsa-miR-95-5p
0.07803	0.0193863	2.89923	-3.47113	0.844905	hsa-miR-7-2-3p
0.07805	0.0194166	-2.89823	-3.47269	-0.827781	hsa-miR-4312
0.07805	0.0194348	2.89762	-3.47363	0.841865		no information
0.07807	0.0194741	-2.89633	-3.47564	-0.905366	hsa-miR-3611
0.07807	0.0194854	2.89595	-3.47623	1.28847	hsa-miR-422a
0.07808	0.0195505	2.89381	-3.47956	1.39884		no information
0.07808	0.0195573	-2.89358	-3.47991	-0.947452		no information
0.07808	0.0195725	2.89308	-3.48068	1.19302	hsa-miR-181a-3p
0.07808	0.0195755	2.89298	-3.48084	1.77923		no information
0.07813	0.0196316	2.89114	-3.48369	0.989254		no information
0.07887	0.0198934	-2.88263	-3.49693	-0.760944	hsa-miR-3689a-5p/hsa-miR-3689b-5p/hsa-miR-3689e
0.07887	0.0198975	-2.88249	-3.49714	-1.17135		no information
0.07887	0.0199034	2.8823	-3.49743	1.8288	hsa-miR-139-5p
0.07887	0.0199065	2.8822	-3.49759	1.32594		no information
0.07906	0.0199766	2.87994	-3.5011	0.931056	hsa-miR-641
0.07931	0.0200684	-2.87699	-3.50568	-0.929487	hsa-miR-1246
0.07931	0.0201107	2.87564	-3.50778	1.12682		no information
0.07931	0.0201126	2.87558	-3.50787	0.773365	hsa-miR-196a-3p
0.07931	0.0201296	2.87504	-3.50872	0.780398		no information
0.07966	0.0202427	2.87143	-3.51431	1.11456	hsa-miR-574-3p
0.07974	0.0202855	2.87008	-3.51642	1.03118		no information
0.0801	0.0204428	2.86511	-3.52413	1.61523		no information
0.0801	0.0204504	2.86488	-3.5245	1.27396		no information
0.0801	0.0204752	2.8641	-3.52571	0.947053	hsa-miR-4490
0.0801	0.020497	2.86341	-3.52678	1.58907	hsa-miR-4771
0.0801	0.0204974	2.8634	-3.52679	0.832204	hsa-miR-298
0.0801	0.020512	2.86294	-3.5275	2.04494	hsa-miR-1297
0.08022	0.0205648	2.86129	-3.53007	1.04042		no information
0.08037	0.0206274	2.85934	-3.53311	0.798169		no information
0.08056	0.0206974	2.85717	-3.53648	1.0117	hsa_negative_control_2
0.0807	0.0207565	-2.85533	-3.53933	-0.846997		no information
0.08084	0.0208158	2.8535	-3.54218	0.818621	hsa-miR-885-3p
0.10183	0.0312564	2.77111	-3.54335	2.70597		no information
0.08106	0.0208953	2.85105	-3.54598	0.97278	hsa-miR-22-5p
0.08127	0.0209714	2.84872	-3.54961	1.15589		no information
0.08141	0.0210475	2.8464	-3.55322	0.877857	hsa-miR-5694
0.08141	0.0210535	2.84622	-3.5535	1.08205	hsa-miR-181b-5p
0.08159	0.0211248	2.84404	-3.55687	2.17669		control
0.0816	0.0211499	-2.84328	-3.55806	-0.822353	hsa-miR-4687-5p
0.08172	0.0212769	2.83944	-3.56403	2.14461	hsa-miR-28-5p
0.08172	0.0213065	2.83855	-3.56541	1.12109		no information
0.08172	0.0213158	2.83827	-3.56585	1.46963		no information
0.08172	0.0213185	2.83819	-3.56598	1.37177	hsa-miR-519c-3p
0.08172	0.0213255	2.83798	-3.56631	1.4085		no information
0.08172	0.0213373	2.83762	-3.56686	0.977239	hsa-miR-676-5p
0.08172	0.0213437	-2.83743	-3.56715	-1.01017	hsa-miR-5571-3p
0.08172	0.021366	2.83676	-3.5682	1.10339		no information
0.08175	0.0213965	-2.83585	-3.56962	-0.845069		no information
0.08187	0.0214515	-2.8342	-3.57218	-0.784727	hsa-miR-3201
0.08192	0.0215	2.83275	-3.57443	0.797946		no information
0.08192	0.0215116	2.8324	-3.57497	1.49344	hsa-miR-5197-3p
0.08192	0.0215411	2.83152	-3.57634	2.44059	hsa-miR-196b-5p
0.08192	0.0215573	2.83104	-3.57708	1.28409		no information
0.0906	0.025276	-2.81273	-3.58236	-1.56907	hsa-miR-548am-3p
0.08244	0.0217156	-2.82635	-3.58437	-0.807197		no information
0.08253	0.0217647	2.8249	-3.58663	1.39511	hsa-miR-146b-5p
0.08254	0.0217908	2.82413	-3.58782	1.47935	hsa-miR-17-5p
0.08276	0.0218706	2.82179	-3.59146	1.21173	hsa-miR-542-3p
0.08277	0.0218978	-2.82099	-3.5927	-0.884859	kshv-miR-K12-10a-3p
0.08303	0.021989	-2.81833	-3.59684	-0.991773	hsa-miR-3714
0.08346	0.022136	-2.81406	-3.60348	-1.45617	hsa-miR-4524b-5p
0.08346	0.0221943	-2.81237	-3.6061	-0.829804		no information
0.08346	0.0222051	-2.81206	-3.60658	-1.06	hsa-miR-4462
0.08346	0.0222218	-2.81158	-3.60733	-0.948039		control
0.08346	0.0222387	2.81109	-3.60809	1.12434	hsa-miR-4527
0.08346	0.0222455	2.8109	-3.6084	1.27886	hsa-miR-24-3p
0.08432	0.0225227	2.80297	-3.62073	1.32611	kshv-miR-K12-2-5p
0.08445	0.0225802	-2.80133	-3.62327	-0.782178	hsa-miR-4698
0.08471	0.0226742	2.79867	-3.6274	0.861887	hsa-miR-671-3p
0.0848	0.0227227	-2.7973	-3.62953	-1.09238	hsa-miR-1225-3p
0.0848	0.0227448	2.79668	-3.6305	2.69643		no information
0.08484	0.0227817	-2.79564	-3.63211	-0.775075		no information
0.08489	0.0228188	2.7946	-3.63373	0.981809		control
0.0852	0.0229264	-2.79159	-3.63841	-0.836847	hsa-miR-4664-3p
0.08539	0.0230223	2.78892	-3.64256	1.00842		no information
0.08539	0.0230257	2.78882	-3.64271	0.790806	hsa-miR-34b-3p
0.0855	0.023078	2.78737	-3.64497	1.20123	hsa-miR-513a-3p
0.08551	0.0231046	2.78663	-3.64612	1.17439	hsa-miR-764
0.08551	0.0231293	2.78595	-3.64718	1.12494	hsa-miR-376c-3p
0.08572	0.0232117	2.78367	-3.65072	1.40678		control
0.08628	0.0234117	2.77818	-3.65926	0.740358	hsa-miR-548ah-5p
0.08643	0.0234755	2.77644	-3.66196	0.962476	hsa-miR-548d-5p
0.11789	0.0401857	-2.71724	-3.66231	-1.56088	hsa-miR-548ah-3p
0.08693	0.0236373	2.77205	-3.66879	1.77189	hsa-miR-3921
0.08762	0.0238482	-2.76637	-3.67762	-0.831264	hsa-miR-486-5p
0.08767	0.0239007	2.76496	-3.67981	1.02846		no information
0.08774	0.0239691	2.76314	-3.68265	1.31813	hsa-miR-142-5p
0.08774	0.0239812	-2.76281	-3.68315	-0.832584		no information
0.08799	0.0240739	2.76035	-3.68699	0.820439	hsa-miR-548ax
0.08816	0.024161	-2.75804	-3.69058	-0.827268	hsa-miR-4485-3p
0.08816	0.0241803	2.75753	-3.69137	0.810475	hsa-miR-629-5p
0.08845	0.0243139	2.75401	-3.69684	0.759882	hsa-miR-3944-5p
0.08845	0.0243241	-2.75374	-3.69726	-0.760536	hsa-miR-4728-3p
0.11187	0.0366803	-2.65296	-3.70179	-1.25642		no information
0.08959	0.0246731	2.74463	-3.71141	0.764566	hsa-miR-331-5p
0.08959	0.0246878	-2.74425	-3.712	-0.800308		no information
0.08968	0.0247626	2.74232	-3.71501	1.45302	hsa-miR-122-3p
0.08968	0.0247658	-2.74224	-3.71514	-0.948139		no information
0.08975	0.0248097	-2.74111	-3.71689	-0.718139	hsa-miR-664a-3p
0.08993	0.0248852	2.73916	-3.71991	0.921485	hsa-miRPlus-D1058
0.09011	0.0249646	2.73713	-3.72308	0.864826		no information
0.09011	0.0250117	2.73593	-3.72495	1.07933	hsa-miR-149-5p
0.09011	0.0250205	2.7357	-3.7253	0.905261		no information
0.09011	0.0250353	2.73532	-3.72588	1.00401		no information
0.09011	0.0250622	-2.73464	-3.72695	-0.895955		no information
0.09033	0.0251488	2.73244	-3.73037	0.955482	hsa-miR-3923
0.09042	0.0251998	2.73114	-3.73238	1.08446	hsa-miR-5094
0.09063	0.0253098	2.72836	-3.73671	0.771788		no information
0.09088	0.0254047	2.72597	-3.74042	1.07516	ebv-miR-BART14-3p
0.09113	0.0255004	2.72357	-3.74415	1.12131	hsa-miR-3130-3p
0.09125	0.0255883	-2.72137	-3.74757	-0.831889	hsa-miR-553
0.09125	0.0255963	2.72118	-3.74788	1.0138	hsa-miR-186-3p
0.09125	0.0256305	2.72032	-3.7492	1.03782	hsa-miR-3150a-3p
0.09125	0.0256355	2.7202	-3.74939	0.832953		no information
0.09135	0.0256949	2.71872	-3.75169	1.37717	hsa-let-7g-5p
0.09135	0.0257167	2.71818	-3.75253	0.783894		no information
0.09161	0.0258164	2.71571	-3.75637	1.09777	hsa-miR-888-5p
0.09994	0.0300826	2.69383	-3.7564	1.82797	hsa-miR-144-5p
0.09172	0.0258774	2.7142	-3.75871	1.01854	hsa-miR-4495
0.09172	0.0258986	2.71368	-3.75952	1.29276	hsa-miR-1911-3p
0.092	0.0260034	-2.7111	-3.76353	-0.982335	hsa-miR-100-3p
0.09205	0.0260424	-2.71015	-3.76501	-1.08564	hsa-miR-4687-3p
0.0922	0.0261385	2.7078	-3.76867	1.62804	hsa-miR-27b-3p
0.09237	0.0262293	-2.70559	-3.7721	-1.52431		no information
0.09237	0.0262391	2.70535	-3.77247	0.775895	hsa-miR-504-5p
0.09237	0.0262792	2.70437	-3.77399	0.852774		no information
0.09237	0.0262906	-2.7041	-3.77442	-1.0205		no information
0.09238	0.0263193	2.7034	-3.7755	1.38011		no information
0.09243	0.0263603	2.70241	-3.77704	1.08079	hsa-miR-96-3p
0.09243	0.0263854	2.7018	-3.77799	0.953378		no information
0.09244	0.026424	2.70087	-3.77944	0.977671		no information
0.09244	0.026442	2.70044	-3.78011	2.16732	hsa-miR-374a-5p
0.09253	0.0264921	2.69923	-3.78199	1.86378		no information
0.09261	0.0265577	2.69765	-3.78444	1.15137		no information
0.09261	0.026569	2.69738	-3.78486	1.76088		no information
0.09278	0.026683	-2.69465	-3.7891	-0.756155		no information
0.09278	0.0266965	2.69433	-3.7896	1.33859	hsa-miR-4460
0.09278	0.0266969	2.69432	-3.78962	0.852402		no information
0.09283	0.0267553	2.69292	-3.79178	1.55196	hsa-miR-5589-3p
0.09283	0.0267635	2.69273	-3.79209	0.942978	hsa-miR-3682-3p
0.09297	0.0268292	-2.69116	-3.79452	-0.79316	hsa-miR-4726-5p
0.09297	0.0268565	-2.69051	-3.79552	-0.916914		no information
0.09311	0.0269354	2.68865	-3.79843	1.66147		no information
0.09311	0.0269671	2.68789	-3.79959	1.4147		no information
0.09311	0.0269751	2.68771	-3.79989	1.07029		no information
0.09322	0.027033	2.68634	-3.80201	1.10475		no information
0.09346	0.0271289	-2.68408	-3.80552	-0.904009		no information
0.09365	0.0272367	2.68155	-3.80945	0.879572		no information
0.09365	0.027237	2.68155	-3.80946	0.842477	hsa-miR-3173-3p
0.09381	0.0273097	2.67985	-3.8121	0.818553		no information
0.0939	0.0273622	-2.67862	-3.814	-0.907162	hsa-miR-3943
0.09395	0.0274045	-2.67764	-3.81553	-0.930565	hsa-miR-3127-3p
0.09425	0.0275186	2.67499	-3.81964	1.25685	hsa-miR-499a-5p
0.09509	0.0277906	2.66873	-3.82938	0.856498	hsa-miR-4676-3p
0.0959	0.0280545	-2.6627	-3.83873	-1.00694	hsa-miR-148a-5p
0.09608	0.028135	2.66088	-3.84156	1.11104	hsa-miR-3200-5p
0.09668	0.0283366	-2.65633	-3.84863	-1.01937		no information
0.09686	0.0284272	2.6543	-3.85178	2.06858	hsa-miR-19a-5p
0.09686	0.0284444	2.65391	-3.85238	1.42888		no information
0.10551	0.0331331	2.62823	-3.85259	1.60391		no information
0.09688	0.0284772	2.65318	-3.85352	1.02743	hsa-miR-651-5p
0.09689	0.0285126	2.65239	-3.85475	1.02916		no information
0.09689	0.0285363	2.65186	-3.85557	0.778097		no information
0.09696	0.028585	2.65077	-3.85726	0.749805		no information
0.09719	0.0286802	-2.64866	-3.86054	-0.696066		no information
0.09738	0.0287618	2.64685	-3.86335	1.27527	hsa-miR-3194-5p
0.09749	0.0288218	2.64552	-3.86541	0.993424		no information
0.09755	0.0288683	2.64449	-3.86701	1.30087		no information
0.09755	0.0288942	2.64392	-3.86789	1.36669	hsa-miR-545-5p
0.09756	0.028925	-2.64324	-3.86895	-0.962814	hsa-miR-873-3p
0.09756	0.0289613	2.64245	-3.87019	0.793713		no information
0.09756	0.0289872	2.64188	-3.87107	0.904924	hsa-miR-548s
0.09756	0.029032	2.64089	-3.8726	2.42556	hsa-miR-145-3p
0.09756	0.0290379	-2.64077	-3.8728	-1.01135		no information
0.09756	0.0290641	-2.64019	-3.87369	-0.695589		no information
0.09762	0.0291145	2.63909	-3.8754	1.04609	hsa-miR-5007-5p
0.09762	0.0291378	-2.63858	-3.87619	-0.770146	ebv-miR-BHRF1-2-3p
0.09853	0.0294609	-2.63156	-3.88709	-0.80589	hsa-miR-296-5p
0.09853	0.0294632	-2.63151	-3.88716	-0.710267		no information
0.09853	0.0294908	2.63091	-3.88809	1.40007	hsa-miR-548y
0.09855	0.0295703	-2.6292	-3.89075	-0.815409		no information
0.09855	0.0295725	2.62916	-3.89082	1.21784	hsa-miR-4275
0.09855	0.0295841	2.6289	-3.89121	0.930047	hsa-miR-33b-5p
0.09855	0.0296082	-2.62839	-3.89201	-1.02904	hsa-miR-4313
0.09912	0.029809	2.62409	-3.89869	0.940872		control
0.10007	0.0301502	-2.61685	-3.90992	-0.765231	hsa-miR-1976
0.10055	0.0303477	2.61269	-3.91637	1.16198	hsa-miR-548a-3p
0.10928	0.035334	-2.58468	-3.91649	-1.51238		no information
0.10055	0.0303524	2.61259	-3.91652	1.02402		no information
0.10078	0.0304775	2.60998	-3.92058	0.935472		no information
0.10078	0.0304791	-2.60994	-3.92063	-0.958653		no information
0.10084	0.0305269	2.60895	-3.92218	0.976104	hsa-miR-3190-3p
0.10096	0.0306428	2.60654	-3.92592	0.949508		no information
0.10096	0.0306542	-2.6063	-3.92628	-0.960101	hsa-miR-18b-3p
0.10096	0.0306728	2.60592	-3.92688	0.797615		no information
0.10096	0.0306755	2.60586	-3.92697	1.33044		no information
0.10146	0.0308651	2.60194	-3.93305	0.737753		no information
0.10146	0.0308908	2.60141	-3.93386	1.80361	hsa-miR-3609
0.10146	0.0309146	2.60092	-3.93462	0.928482		no information
0.10149	0.0309505	2.60018	-3.93577	0.818234		control
0.10151	0.0310341	2.59847	-3.93843	0.781749		no information
0.10151	0.0310581	-2.59798	-3.93919	-0.885333	hsa-miR-3180-5p
0.10151	0.0310745	2.59764	-3.93971	1.07294	hsa-miR-1238-3p
0.10151	0.0311135	2.59685	-3.94095	0.978393	hsa-miR-4692
0.10151	0.0311243	-2.59663	-3.94129	-0.8055		no information
0.10151	0.0311291	2.59653	-3.94145	0.763757	hsa-miR-3186-3p
0.10197	0.03133	2.59244	-3.94779	0.774289		no information
0.10207	0.0313874	-2.59127	-3.94959	-0.808785		no information
0.10233	0.0314987	-2.58902	-3.95308	-0.803295		no information
0.10252	0.0315835	2.58731	-3.95573	0.842357		no information
0.10268	0.0316645	2.58569	-3.95825	0.827447	hsa-miR-1294
0.10269	0.0317201	2.58457	-3.95998	0.688366		no information
0.10269	0.0317243	2.58449	-3.96011	1.61561		control
0.10313	0.0318946	-2.58109	-3.96539	-0.891543	hsa-miR-744-5p
0.10313	0.0319183	-2.58061	-3.96612	-0.798497	kshv-miR-K12-3-5p
0.10373	0.0321348	2.57632	-3.97278	0.797683	hsa-miR-1972
0.10414	0.0322886	2.57328	-3.97748	1.04183	hsa-miR-3147
0.1043	0.0323814	-2.57146	-3.98031	-0.772577		no information
0.1043	0.0323999	2.5711	-3.98087	1.13181	ebv-miR-BART21-5p
0.10449	0.0324872	-2.56939	-3.98352	-0.872386	hsa-miR-1469
0.10453	0.0325295	2.56856	-3.9848	0.969805		no information
0.10466	0.032599	-2.56721	-3.9869	-0.752352	hsa-miR-3189-5p
0.10482	0.0326785	2.56566	-3.9893	1.2444	hsa-miR-33a-5p
0.10501	0.0327912	-2.56347	-3.99269	-0.851767	hsa-miR-1227-3p
0.10501	0.0327967	-2.56336	-3.99285	-0.743724	hsa-miR-4421
0.10533	0.0329255	2.56087	-3.99671	0.725384	hsa-miR-4482-5p
0.10538	0.0329998	-2.55944	-3.99893	-0.832239	hsa-miR-4649-3p
0.10538	0.0330014	-2.55941	-3.99898	-0.841631		no information
0.10547	0.0330592	2.5583	-4.0007	1.19692	hsa-miR-487b-3p
0.10549	0.0330949	2.55761	-4.00176	1.21863		no information
0.10597	0.0333264	2.55319	-4.00862	0.785835		no information
0.10597	0.0333654	-2.55244	-4.00977	-0.767111		no information
0.10597	0.0333655	2.55244	-4.00977	0.926091	hsa-miR-4641
0.10604	0.0334173	-2.55146	-4.0113	-0.760049		no information
0.10613	0.0335177	2.54955	-4.01425	1.32594		control
0.10613	0.0335451	2.54903	-4.01505	0.842058		no information
0.10613	0.0335992	-2.54801	-4.01663	-0.694392		no information
0.10613	0.0336011	2.54798	-4.01669	1.23278	hsa-miR-1305
0.10613	0.0336364	2.54731	-4.01773	1.80527	hsa-miR-4324
0.10613	0.0336389	-2.54726	-4.0178	-0.822003	hsa-miR-4478
0.10613	0.0336576	2.54691	-4.01834	1.03779	hsa-miR-338-5p
0.14747	0.0575758	2.42771	-4.02172	1.73912	hsa-miR-4772-5p
0.10707	0.0339862	2.54074	-4.02789	0.898068		no information
0.10709	0.0340212	2.54008	-4.02891	0.809989		no information
0.10721	0.0340916	2.53877	-4.03094	1.66482	hsa-miR-512-3p
0.10729	0.034147	2.53774	-4.03254	2.13349	hsa-miR-1205
0.10744	0.0342226	2.53634	-4.03471	0.94934	hsa-miR-616-5p
0.1076	0.0343044	-2.53482	-4.03705	-0.796743		no information
0.10798	0.0344578	-2.53199	-4.04144	-0.75914	hsa-miR-424-3p
0.10805	0.0345179	2.53088	-4.04315	0.853213	hsa-miR-134-5p
0.10805	0.0345562	-2.53018	-4.04424	-0.847069		no information
0.10805	0.0345716	2.5299	-4.04468	1.73932	hsa-miR-27a-3p
0.1087	0.034834	-2.5251	-4.0521	-0.683494	hsa-miR-657
0.1087	0.0348393	2.525	-4.05225	0.856336	hsa-miR-146a-3p
0.10886	0.0349211	2.52351	-4.05456	1.19548		control
0.10889	0.0349708	-2.52261	-4.05595	-0.701051	hsa-miR-548a-5p
0.10889	0.0349978	-2.52212	-4.05671	-0.787786	hsa-miR-943
0.10889	0.0350257	2.52161	-4.05749	0.719333	hsa-miR-676-3p
0.10905	0.0351072	2.52014	-4.05977	1.14047	hsa-miR-3140-5p
0.10907	0.0351885	2.51867	-4.06205	1.10769	hsa-miRPlus-A1086
0.10907	0.0351996	-2.51847	-4.06235	-0.747595	hsa-miR-4754
0.10907	0.0352062	-2.51835	-4.06254	-0.782815	hsa-miR-4516
0.10918	0.0352715	-2.51717	-4.06436	-0.650604		no information
0.10967	0.0355048	2.51299	-4.07083	0.907664		no information
0.10967	0.0355461	2.51225	-4.07197	0.734525		no information
0.10967	0.0355557	2.51208	-4.07223	0.814788	hsa-miR-34a-3p
0.10969	0.0355915	2.51145	-4.07322	0.916866	hsa-miR-5682
0.10987	0.0356802	-2.50987	-4.07566	-0.863869	hsa-miR-508-5p
0.11	0.0357536	-2.50856	-4.07768	-0.826295	hsa-miR-483-5p
0.11085	0.0360616	-2.50312	-4.08609	-0.7431		no information
0.11103	0.0361513	2.50154	-4.08853	0.968044	hsa-miR-4677-5p
0.11104	0.0361869	2.50092	-4.0895	1.7022	hsa-miR-374c-5p
0.11116	0.036257	2.49969	-4.0914	1.21607	hsa-miR-4737
0.1429	0.0546391	2.36332	-4.09353	1.33471	hsa-miR-380-5p
0.11169	0.0364922	2.49559	-4.09774	1.18948	hsa-miR-18b-5p
0.11169	0.0365216	2.49508	-4.09853	0.657859		no information
0.11169	0.0365234	2.49505	-4.09857	0.703852	hsa-miR-4665-5p
0.11187	0.0366291	2.49321	-4.1014	0.69073	hsa-miR-4518
0.11187	0.0366992	2.492	-4.10328	1.43116		control
0.11187	0.0367108	2.4918	-4.10359	1.4561	hsa-miR-193a-3p
0.11229	0.0369235	-2.48813	-4.10925	-0.849602	hsa-miR-3190-5p
0.11229	0.0369314	2.488	-4.10946	1.19135		no information
0.11229	0.0369437	-2.48779	-4.10979	-1.07475		no information
0.11231	0.0369805	2.48715	-4.11076	0.907231		no information
0.11232	0.0370183	2.48651	-4.11176	1.23612		no information
0.11232	0.0370475	-2.48601	-4.11254	-0.895004		no information
0.11285	0.0372565	2.48244	-4.11805	0.850164		no information
0.11335	0.0374631	2.47893	-4.12347	0.680618	hsa-miR-3612
0.11335	0.0374842	2.47857	-4.12402	0.839097	hsa-miR-205-5p
0.11374	0.0376469	-2.47583	-4.12826	-0.708618	hsa-miR-4449
0.11383	0.0377374	2.47431	-4.13061	1.32374		no information
0.11383	0.0377645	2.47385	-4.13131	1.63911		no information
0.11383	0.0377728	2.47371	-4.13153	0.779999		no information
0.11384	0.037815	-2.473	-4.13262	-0.770716	hsa-miR-5193
0.11384	0.0378405	2.47257	-4.13328	0.827931	hsa-miR-4424
0.11388	0.037884	-2.47185	-4.1344	-1.14031		no information
0.11398	0.0379518	2.47071	-4.13615	0.845314	hsa-miR-662
0.11414	0.038036	2.46931	-4.13832	1.01049		5S_rRNA
0.1143	0.0381211	2.46789	-4.14051	1.23166		no information
0.11456	0.0382693	2.46543	-4.14431	1.67296		no information
0.11456	0.0382911	2.46507	-4.14486	1.64521	hsa-miR-98-5p
0.11456	0.0383042	2.46485	-4.1452	0.667898		no information
0.11474	0.0384012	2.46325	-4.14768	0.902782	hsa-miR-5591-5p
0.11474	0.0384414	-2.46258	-4.1487	-1.33207	hsa-miR-4537
0.11474	0.0384632	2.46222	-4.14925	1.10062	hsa-miRPlus-A1025
0.11492	0.0385549	2.46071	-4.15158	0.965073	hsa-miR-181a-5p
0.11555	0.0387996	2.4567	-4.15777	1.1105	hsa-miR-518f-5p
0.11557	0.0388375	-2.45608	-4.15873	-0.805401		no information
0.11573	0.0389269	2.45463	-4.16097	0.695067	hsa-miR-4471
0.16064	0.0663128	2.31624	-4.16199	1.13387	hsa-miR-3977
0.11597	0.0390479	2.45266	-4.16401	1.44763	hsa-miR-493-5p
0.11597	0.0390716	-2.45227	-4.1646	-0.822745	hsa-miR-4455
0.11666	0.0393362	2.44799	-4.1712	0.864965	hsa-miR-548am-5p/hsa-miR-548c-5p/hsa-miR-548o-5p
0.11669	0.0393821	-2.44725	-4.17234	-1.01532		no information
0.11703	0.0395588	-2.44442	-4.17672	-0.673751		no information
0.11703	0.0395768	2.44413	-4.17716	0.997435	kshv-miR-K12-9-3p
0.11703	0.0396146	-2.44352	-4.17809	-0.814587	hsa-miR-4667-3p
0.11703	0.0396291	-2.44329	-4.17845	-0.836701		no information
0.11731	0.0397641	2.44113	-4.18177	1.7288		no information
0.11731	0.0397911	2.4407	-4.18244	1.03355	hsa-miR-548ao-5p
0.16283	0.0677239	2.29972	-4.18283	1.11591		no information
0.11731	0.0398376	2.43996	-4.18358	1.08117	hsa-miR-181c-3p
0.11731	0.0398677	2.43948	-4.18432	0.672404	hsa-miR-4287
0.11731	0.0398883	2.43916	-4.18482	0.644465	hsa-miR-139-3p
0.1174	0.0399726	2.43782	-4.18688	0.769923	hsa-miR-3925-3p
0.1174	0.0399851	2.43762	-4.18719	0.675939	hsa-miR-4645-5p
0.11798	0.0402897	2.43281	-4.1946	0.876494	hsa-let-7i-5p
0.11798	0.0402977	2.43268	-4.19479	1.13277		no information
0.11798	0.0403159	2.4324	-4.19523	1.10731		no information
0.11807	0.0404408	2.43044	-4.19825	1.52092		control
0.11807	0.040441	-2.43043	-4.19826	-1.19582		no information
0.11807	0.0405003	2.4295	-4.19969	0.683592		control
0.11807	0.0405162	-2.42925	-4.20008	-0.666823		no information
0.11807	0.0405489	2.42874	-4.20086	0.903951	hsa-miR-4793-3p
0.11807	0.0406063	-2.42785	-4.20224	-0.673313		no information
0.11807	0.0406089	2.42781	-4.20231	0.992602		no information
0.11807	0.0406126	2.42775	-4.20239	0.739275	hsa-miR-3682-5p
0.1182	0.0406922	2.42651	-4.2043	0.696387	hsa-miR-4264
0.11829	0.0407579	2.42548	-4.20588	1.29896		no information
0.11879	0.0409624	-2.42231	-4.21077	-0.964505		no information
0.11907	0.0411188	2.4199	-4.21448	0.768427		no information
0.11907	0.0411269	2.41977	-4.21467	0.717655	hsa-miR-576-5p
0.15423	0.0619464	2.27316	-4.2158	1.94081		no information
0.11913	0.0411931	2.41875	-4.21625	1.2054		no information
0.11913	0.0412143	2.41843	-4.21675	1.38926	hsa-miR-211-3p
0.11929	0.0413039	-2.41705	-4.21887	-0.744254	hsa-miR-3181
0.11936	0.0413621	-2.41616	-4.22024	-1.09218		no information
0.12007	0.0416402	2.41191	-4.22678	1.14662	hsa-miR-4296
0.12008	0.0416897	2.41116	-4.22793	0.998293		no information
0.12008	0.0417618	-2.41006	-4.22962	-0.628906	hsa-miR-3162-3p
0.12008	0.041785	2.40971	-4.23016	1.23106	hsa-miR-338-3p
0.12008	0.0418014	-2.40946	-4.23054	-0.802189	hsa-miR-1237-3p
0.13173	0.0485788	2.37031	-4.23058	1.39232	hsa-miR-4536-5p
0.12008	0.0418755	-2.40834	-4.23227	-0.799017	hsa-miR-4665-3p
0.12008	0.0418936	-2.40806	-4.23269	-0.780346		control
0.12008	0.0419139	2.40776	-4.23316	1.25313	hsa-miR-141-5p
0.12008	0.0419144	-2.40775	-4.23318	-0.675888	hsa-miR-518b
0.12045	0.0420804	2.40524	-4.23703	1.12369		no information
0.12056	0.042153	2.40415	-4.23871	1.00478		no information
0.12069	0.0422323	2.40296	-4.24054	0.809608	hsa-miR-3925-5p
0.12077	0.0423392	2.40136	-4.243	1.11856		no information
0.12077	0.0423436	-2.40129	-4.24311	-0.684747		control
0.12077	0.0423741	2.40084	-4.24381	1.78935		no information
0.12077	0.0423964	2.4005	-4.24432	1.90993		control
0.12107	0.0425344	-2.39844	-4.24748	-0.728125	hsa-miR-1909-5p
0.12114	0.0426242	2.39711	-4.24954	0.910665		control
0.12114	0.0426414	2.39685	-4.24993	0.983364		control
0.12114	0.0426701	2.39642	-4.25059	0.634346	hsa-miR-3171
0.12114	0.0427158	2.39574	-4.25163	0.743359	hsa-miR-4514
0.12114	0.0427295	-2.39554	-4.25194	-0.676246		no information
0.12157	0.0429177	2.39276	-4.25623	0.791194	hsa-miR-4477a
0.12229	0.0432054	2.38852	-4.26273	0.838779	hsa-miR-4432
0.12249	0.0433335	2.38665	-4.26561	0.879914		no information
0.12249	0.0433442	2.38649	-4.26585	1.23475	hsa-miR-23a-3p
0.12294	0.0435538	-2.38343	-4.27055	-2.37162	hsa-miR-200c-3p
0.12294	0.0435841	2.38299	-4.27122	0.830727	hsa-miR-320a
0.12294	0.0436626	2.38185	-4.27298	0.642551	hsa-miR-5586-3p
0.12294	0.0436859	2.38151	-4.2735	0.719757	hsa-miR-4732-5p
0.12294	0.0437101	2.38116	-4.27403	0.797808		no information
0.12294	0.0437142	2.3811	-4.27413	0.819812	hsa-miR-382-5p
0.12352	0.0439561	2.3776	-4.2795	0.952154		no information
0.12384	0.0441052	2.37546	-4.28279	0.69276	hsa-miR-4662b
0.12405	0.0442137	-2.3739	-4.28518	-1.01391		no information
0.12409	0.044263	2.37319	-4.28626	1.08016	hsa-miR-3162-5p
0.12447	0.0444334	2.37076	-4.29	0.945959		no information
0.13756	0.0516723	2.32891	-4.29102	1.06499	hsa-miR-2682-5p
0.12462	0.044523	2.36948	-4.29196	0.932411	hsa-miR-623
0.12479	0.0446187	2.36812	-4.29405	1.13095	hsa-miR-4672
0.12496	0.0447144	-2.36676	-4.29613	-0.792989		no information
0.12513	0.0448123	2.36538	-4.29826	0.869285	hsa-miR-5192
0.12544	0.0449564	-2.36334	-4.30138	-0.77906		no information
0.12576	0.0451453	2.36069	-4.30545	0.617982		no information
0.12576	0.0451496	2.36063	-4.30554	1.58681	hsa-miR-126-3p
0.12576	0.0451781	2.36023	-4.30616	1.10698	hsa-miR-143-3p
0.12579	0.0452258	2.35956	-4.30718	0.783674		no information
0.12641	0.0454825	2.35597	-4.31268	1.63769	hsa-miR-20b-5p
0.12646	0.0455385	2.35519	-4.31388	1.24313		no information
0.12665	0.0456418	2.35375	-4.31608	0.783394	hsa-miR-3913-3p
0.12709	0.0458342	-2.35109	-4.32016	-1.36634	hsa-miR-548o-3p
0.12782	0.0461363	2.34693	-4.32654	0.945183	hsa-miR-450b-5p
0.12815	0.0462901	2.34482	-4.32977	1.07658	hsv2-miR-H2
0.12818	0.046366	2.34378	-4.33136	1.10265	hsa-miR-3692-5p
0.12818	0.0464026	2.34328	-4.33213	0.945876		no information
0.12818	0.0464114	-2.34316	-4.33231	-0.902963	hsa-miR-432-3p
0.12856	0.0465831	-2.34082	-4.3359	-0.719871		no information
0.12856	0.0466366	2.34009	-4.33701	1.51217	hsa-let-7a-3p
0.12856	0.0466573	2.33981	-4.33744	0.889089	hsa-miRPlus-G1246-3p
0.12862	0.0467163	2.33901	-4.33867	0.75514	hsa-miR-4520-5p
0.12971	0.0472259	2.33213	-4.34919	0.70248	hsa-miR-507
0.12971	0.0472399	2.33194	-4.34948	0.694505		no information
0.12971	0.0472502	2.3318	-4.34969	1.62762		no information
0.12971	0.0472632	2.33163	-4.34996	0.778553		no information
0.12971	0.0472927	-2.33124	-4.35056	-0.647246		no information
0.12974	0.0473719	-2.33017	-4.35218	-1.10116		no information
0.12974	0.0473796	-2.33007	-4.35234	-0.898552	hsa-miR-4747-3p
0.12979	0.0474791	-2.32874	-4.35438	-0.867971		no information
0.12979	0.0475276	2.32809	-4.35537	0.597878		no information
0.12979	0.0475407	2.32792	-4.35563	0.633479		control
0.12979	0.047545	2.32786	-4.35572	0.934859	hsa-miR-3610
0.13021	0.0477342	2.32535	-4.35957	1.01497	hsa-miR-497-3p
0.13033	0.047814	2.32429	-4.36119	0.954964		no information
0.13064	0.0479639	-2.3223	-4.36422	-0.771782	hsa-miR-4723-3p
0.13112	0.0481797	2.31946	-4.36857	0.689337	hsa-miRPlus-C1110
0.13112	0.0482152	-2.31899	-4.36929	-0.608599	hsa-miR-634
0.13136	0.0483403	2.31735	-4.3718	0.753156	hsa-miR-589-5p
0.13162	0.0484734	2.31561	-4.37446	0.672754	hsa-miR-4667-5p
0.13173	0.0485998	2.31395	-4.37698	1.19504	hsa-miR-5683
0.13173	0.0486417	-2.31341	-4.37782	-1.24548	hsa-miR-4322
0.13173	0.0486998	2.31265	-4.37897	0.664938	bkv-miR-B1-5p
0.13173	0.0486999	2.31265	-4.37897	0.642034	hsa-miR-4655-5p
0.132	0.048836	-2.31088	-4.38168	-1.06733	hsa-miR-147b
0.13263	0.0491065	2.30738	-4.38702	0.705725	hsa-miR-4780
0.13316	0.0493434	2.30433	-4.39168	0.865953		no information
0.13335	0.0494712	-2.30269	-4.39418	-0.76606		no information
0.13335	0.0494869	2.30249	-4.39449	0.917415	hsa-miR-3622a-5p
0.13368	0.0496491	-2.30041	-4.39766	-0.611594	hsa-miR-4769-3p
0.13379	0.049727	2.29942	-4.39917	1.20104		no information
0.1344	0.0500403	2.29544	-4.40525	0.746385	hsa-miR-4775
0.1344	0.0500511	2.2953	-4.40546	0.626082	hsa-miR-3941
0.1344	0.0500661	-2.29511	-4.40575	-2.58291	hsa-miR-141-3p
0.1345	0.0501792	-2.29368	-4.40793	-1.09625	hsa-miR-624-5p
0.1345	0.0501804	2.29367	-4.40795	0.618287		no information
0.13481	0.0503334	2.29174	-4.4109	1.19662	hsa-miR-125b-5p
0.13514	0.0505233	2.28935	-4.41454	0.814872	hsa-miR-512-5p
0.13514	0.0505345	2.28921	-4.41475	1.74585	hsa-miR-590-5p
0.13514	0.0505781	2.28866	-4.41559	0.79662		no information
0.13514	0.0506319	-2.28799	-4.41661	-0.619495	hsa-miR-718
0.13514	0.0506476	-2.28779	-4.41691	-1.17135	hsa-miR-2052
0.13684	0.051324	2.27938	-4.42973	0.869507	kshv-miR-K12-7-5p
0.13694	0.0514015	-2.27842	-4.43119	-0.760335	hsa-miR-1184
0.13762	0.0517332	2.27434	-4.4374	3.13899	hsa-miR-1-3p
0.13784	0.0518546	2.27286	-4.43966	0.955901		control
0.13816	0.0520158	-2.27089	-4.44266	-0.896951	hsa-miR-4764-3p
0.13818	0.0520938	-2.26994	-4.4441	-0.696528	hsa-miR-4756-3p
0.13818	0.052102	-2.26984	-4.44426	-0.662151		no information
0.13846	0.0522441	2.26811	-4.44689	0.992262	hsa-miR-3124-5p
0.13862	0.0523748	-2.26653	-4.4493	-0.617965	hsa-miR-501-5p
0.13862	0.0523823	2.26644	-4.44944	0.806624	hsa-miR-181b-3p
0.13891	0.0525347	2.2646	-4.45224	0.877736	hsa-miR-4425
0.14003	0.0529954	2.25906	-4.46066	1.23797		no information
0.14043	0.0531854	2.25679	-4.46411	0.752534	hsa-miR-3529-5p
0.14075	0.0533487	2.25484	-4.46707	1.24816	hsa-miR-583
0.14106	0.0535072	2.25296	-4.46993	1.15924	hsa-miR-539-5p
0.14138	0.0536664	-2.25108	-4.47279	-0.695253	hsa-miR-4652-3p
0.1414	0.0537509	-2.25008	-4.4743	-0.657816	hsa-miR-4496
0.1414	0.0538321	-2.24912	-4.47576	-0.888683		no information
0.1414	0.0538321	2.24912	-4.47576	0.660685	hsa-miR-323a-3p
0.1414	0.0538347	2.24909	-4.47581	0.662364	hsa-miR-154-3p
0.14213	0.0541546	2.24533	-4.48151	0.944242	hsa-miR-515-3p
0.14213	0.0542124	2.24466	-4.48254	0.701409		no information
0.14213	0.0542312	2.24444	-4.48288	1.15441	hsa-miR-302b-3p
0.1429	0.0545824	2.24034	-4.48909	0.878529		control
0.1429	0.054688	2.23911	-4.49095	0.693931		no information
0.1429	0.0546975	2.239	-4.49112	0.843991	hsa-miR-3913-5p
0.1429	0.0547277	2.23865	-4.49165	0.803306	hsa-miR-5705
0.14368	0.0550674	-2.23473	-4.49761	-0.643843	hsa-miR-484
0.14372	0.0551227	2.23409	-4.49858	0.73129	hsa-miR-3691-5p
0.14398	0.0552625	-2.23248	-4.50101	-0.623414		no information
0.14399	0.0553078	2.23196	-4.5018	1.07462		no information
0.14442	0.0555153	-2.22959	-4.5054	-0.623438		no information
0.14455	0.0556044	2.22857	-4.50695	0.971484		no information
0.1446	0.0556652	2.22788	-4.508	0.71696	hsa-miR-3185
0.14507	0.0558894	-2.22533	-4.51186	-0.754151		no information
0.14508	0.0559514	-2.22462	-4.51293	-0.615368		no information
0.14508	0.0559936	2.22414	-4.51365	0.701303	hsa-miR-494-5p
0.14508	0.056015	2.2239	-4.51402	1.62147	hsa-miR-192-3p
0.14528	0.0561342	-2.22255	-4.51607	-0.746496		no information
0.14543	0.0562319	2.22145	-4.51774	1.18759	hsa-miR-548aj-3p
0.1455	0.0563019	-2.22066	-4.51893	-0.976362	hsa-miR-1292-5p
0.1463	0.0566514	2.21673	-4.52488	0.745853	hsa-miR-3667-3p
0.1464	0.05673	-2.21585	-4.52621	-0.602169	hsa-miR-660-3p
0.14649	0.056809	2.21497	-4.52755	0.791224	hsa-miR-337-5p
0.14676	0.0569795	2.21307	-4.53043	2.58397		no information
0.14676	0.0569964	-2.21288	-4.53072	-0.604579		no information
0.1468	0.0570527	2.21225	-4.53166	0.707658		no information
0.14683	0.0571463	-2.21121	-4.53324	-0.578996	hsa-miR-877-3p
0.14683	0.0571468	2.21121	-4.53325	0.6543		no information
0.14686	0.0571985	-2.21063	-4.53412	-0.585753	hsa-miR-551a
0.14691	0.0572591	2.20996	-4.53513	0.633534	hsa-miR-635
0.14694	0.0573128	2.20936	-4.53603	0.730741	hsa-miR-758-3p
0.14747	0.0576046	2.20614	-4.54091	0.934592		no information
0.14806	0.0578781	2.20313	-4.54546	0.781613	hsa-miR-4709-5p
0.14852	0.0581015	-2.20069	-4.54916	-0.611517		no information
0.14852	0.0581421	2.20024	-4.54983	0.946688	hsa-miR-3156-5p
0.14857	0.0582029	-2.19958	-4.55083	-0.739398	hsa-miR-4742-3p
0.14884	0.0583489	2.19799	-4.55323	0.890991		no information
0.14898	0.0584855	2.19651	-4.55548	0.859687		no information
0.14898	0.0585239	-2.19609	-4.55611	-0.627089	hsa-miR-1252-5p
0.14898	0.0585306	2.19602	-4.55622	0.815047		no information
0.14971	0.0588604	-2.19245	-4.5616	-0.766484	hsa-miR-3157-3p
0.14973	0.058922	2.19178	-4.56261	0.709936	hsa-miR-3191-3p
0.14973	0.0589932	2.19102	-4.56377	0.650239	hsa-miR-146b-3p
0.14973	0.0589959	2.19099	-4.56381	1.20793		no information
0.14993	0.0591535	2.18929	-4.56637	0.586687	hsa-miR-18a-3p
0.14993	0.059158	2.18924	-4.56644	0.798658	hsa-miR-4760-5p
0.1507	0.0595036	-2.18555	-4.57203	-1.05873	hsa-miR-4266
0.15107	0.0596938	-2.18352	-4.57508	-0.763296	hsa-miR-208a-5p
0.15127	0.0598336	-2.18203	-4.57732	-0.694743	hsa-miR-519d-3p
0.15127	0.0598585	2.18177	-4.57772	2.03823		no information
0.15152	0.060007	2.1802	-4.5801	0.831764	hsa-miR-3689a-3p
0.15152	0.0600418	-2.17983	-4.58065	-0.997512	hsa-let-7d-3p
0.15195	0.0602577	2.17755	-4.58409	0.627932		no information
0.15197	0.0603552	-2.17652	-4.58564	-0.682042	hsa-miR-4758-3p
0.15197	0.060371	-2.17635	-4.58589	-0.803746	hsa-miR-149-3p
0.15197	0.0603944	2.17611	-4.58626	1.0677		no information
0.15217	0.0605172	2.17482	-4.58821	0.784155		no information
0.15257	0.0607187	2.1727	-4.59139	0.848172		no information
0.1665	0.0704964	-2.12096	-4.59238	-1.19278		no information
0.15269	0.060815	-2.1717	-4.59291	-0.62949		no information
0.15269	0.0609026	-2.17078	-4.59428	-0.70851	hsa-miR-129-2-3p
0.15269	0.060967	-2.17011	-4.5953	-0.716047	hsa-miR-4697-3p
0.15269	0.0609708	2.17007	-4.59535	1.59365		no information
0.15269	0.0610056	2.16971	-4.5959	0.646078		no information
0.15269	0.0610235	-2.16952	-4.59618	-0.647046		no information
0.15283	0.0611252	2.16847	-4.59778	0.587306	hsa-miR-608
0.15291	0.0611992	2.1677	-4.59893	1.00022	hsa-miR-3150a-5p
0.15345	0.061458	2.16502	-4.60297	1.06739	hsa-miR-548j-5p
0.15373	0.0616134	-2.16341	-4.60539	-0.688435		no information
0.15413	0.0618188	2.1613	-4.60857	0.814467		no information
0.16911	0.071747	2.10919	-4.60928	1.19566		no information
0.15421	0.0618933	2.16053	-4.60972	0.997798		no information
0.15441	0.0620595	2.15883	-4.61229	0.572837	hsa-miR-3938
0.1701	0.0723577	2.10352	-4.61742	0.871015	hsa-miR-548u
0.15552	0.0625751	-2.15357	-4.6202	-0.65467		no information
0.15552	0.0625966	2.15335	-4.62052	0.684039		no information
0.15567	0.062707	2.15223	-4.62221	0.986911		no information
0.15567	0.062744	2.15185	-4.62277	1.19968	hsa-miR-4650-5p
0.15567	0.0627891	2.1514	-4.62346	0.997916	hsa-miR-3134
0.15614	0.0630205	2.14906	-4.62697	0.615851	hsa-miR-548ak
0.15646	0.0631947	-2.1473	-4.62961	-0.61282	hsa_negative_control_1
0.15665	0.0633136	2.14611	-4.6314	0.677118	hsa-miR-626
0.15681	0.0634225	2.14501	-4.63305	0.916705		no information
0.15718	0.0636168	2.14307	-4.63597	0.548608	hsa-miR-548av-5p/hsa-miR-548k
0.15763	0.0638469	2.14077	-4.63941	0.886679		no information
0.15772	0.0639328	2.13992	-4.6407	0.811636		no information
0.15772	0.064017	2.13908	-4.64195	1.92392	hsa-miR-126-5p
0.15772	0.0641305	2.13795	-4.64364	1.16809		no information
0.15772	0.0641317	2.13794	-4.64366	0.8137		no information
0.15772	0.0641476	2.13778	-4.6439	0.632699	hsa-miR-4778-3p
0.15772	0.0641834	-2.13743	-4.64443	-0.714259		no information
0.15772	0.0641917	2.13735	-4.64455	1.0032	hsa-miR-208a-3p
0.15783	0.0642813	-2.13646	-4.64589	-0.66558	hsa-miR-32-3p
0.15803	0.064496	2.13434	-4.64907	1.08028		no information
0.15803	0.0644979	2.13432	-4.6491	1.01506	hsa-miR-323a-5p
0.15803	0.0644996	-2.1343	-4.64912	-0.600623	hsa-miR-3679-3p
0.15811	0.0645911	2.1334	-4.65047	0.709936	hsa-miR-1302
0.15811	0.0646191	2.13313	-4.65089	2.35108	hsa-miR-196a-5p
0.15866	0.0648907	2.13046	-4.65489	0.697106	hsa-miR-450a-2-3p
0.15872	0.0649613	2.12977	-4.65592	0.645048	hsa-miR-519a-3p
0.15872	0.0650045	2.12934	-4.65656	0.663087	hsa-miR-297
0.15876	0.0650943	-2.12847	-4.65787	-0.97314		no information
0.15876	0.0651298	-2.12812	-4.65839	-0.700686	hsa-miR-423-5p
0.15876	0.065187	-2.12756	-4.65923	-0.715397	hsa-miR-5584-3p
0.15876	0.0652006	2.12743	-4.65943	0.954822	hsa-miR-3141
0.15951	0.0655547	2.12398	-4.66459	0.618976	hsa-miR-658
0.16061	0.0660509	-2.11918	-4.67178	-0.567557		no information
0.16064	0.0661693	-2.11804	-4.67348	-0.6546		no information
0.16064	0.066238	-2.11738	-4.67447	-0.589434	hsa-miR-4707-3p
0.16064	0.0662382	2.11738	-4.67448	0.727316	hsa-miR-4717-5p
0.16064	0.0663078	2.11671	-4.67548	0.751416	hsa-miR-200c-5p
0.16064	0.0663353	-2.11645	-4.67587	-0.894657	hsa-miR-450b-3p
0.17674	0.0771033	2.06099	-4.6783	0.865287		no information
0.16119	0.0666066	2.11385	-4.67976	0.880177		no information
0.16146	0.0667638	-2.11235	-4.682	-0.61084	hcmv-miR-US25-1-3p
0.16163	0.0669173	-2.11089	-4.68419	-0.686426		no information
0.16163	0.0669271	2.1108	-4.68433	0.586823	hsa-miR-4796-3p
0.16267	0.0674044	-2.10627	-4.69109	-0.611844		no information
0.16268	0.0674789	2.10557	-4.69214	0.573015	hsa-miR-449b-3p
0.16268	0.0675154	-2.10522	-4.69266	-0.608019		no information
0.16268	0.0675451	-2.10494	-4.69308	-0.601636		no information
0.16283	0.0677075	-2.10342	-4.69536	-0.857753	hsa-miR-1248
0.16283	0.0677478	2.10304	-4.69593	1.06009	hsa-miR-520f-3p
0.16284	0.0678147	-2.10241	-4.69686	-0.631014		no information
0.16284	0.0678432	2.10214	-4.69726	0.592839	hsa-miR-2115-5p
0.16292	0.0679528	-2.10111	-4.6988	-0.62823	hsa-miR-1228-3p
0.16292	0.0680124	-2.10055	-4.69963	-0.794331		no information
0.16292	0.0680148	-2.10053	-4.69967	-0.999057		no information
0.16366	0.0683697	2.09722	-4.70462	1.13095		no information
0.16399	0.0685747	-2.09531	-4.70746	-0.581582		no information
0.16399	0.0685976	2.0951	-4.70778	0.697981		control
0.16407	0.068678	2.09435	-4.70889	0.790851	hsa-miR-3122
0.16435	0.0688779	2.0925	-4.71165	0.947518		no information
0.16435	0.0689276	2.09204	-4.71234	0.677616		no information
0.16435	0.0689353	2.09197	-4.71245	0.705477	hsa_negative_control_7
0.18158	0.0800103	-2.0362	-4.71366	-0.85262		control
0.16504	0.0692729	2.08886	-4.71709	0.61667	hsa-miR-4712-3p
0.16539	0.069467	2.08707	-4.71974	0.838174	hsa-miR-15b-3p
0.16548	0.0696459	2.08544	-4.72219	0.627774	hsa-miR-550a-5p
0.16548	0.0696534	2.08537	-4.72229	1.0042		no information
0.16548	0.0696638	2.08527	-4.72243	0.707811		no information
0.16548	0.06969	-2.08503	-4.72279	-0.592993		no information
0.1655	0.0697459	-2.08452	-4.72355	-0.646899		no information
0.1657	0.069875	-2.08334	-4.72531	-0.657817	hsa-miR-3976
0.16584	0.070043	-2.08181	-4.72759	-0.696077	hsa-miR-4778-5p
0.16584	0.070066	2.0816	-4.7279	1.13095	hsa-miR-633
0.16584	0.0700775	2.0815	-4.72805	1.07039		no information
0.16591	0.0701578	2.08077	-4.72914	0.913358	hsa-miR-578
0.16591	0.0702005	-2.08038	-4.72972	-0.810657	hsa-miR-611
0.16687	0.0707008	-2.07585	-4.73646	-0.678061		no information
0.16757	0.0710431	2.07278	-4.74104	0.674462	ebv-miR-BART13-5p
0.16982	0.0720945	2.06341	-4.75496	1.13476	hsa-miR-4536-3p
0.17005	0.0722512	2.06202	-4.75702	0.957245		no information
0.17005	0.0722875	2.0617	-4.7575	0.733062	hsa-miR-4498
0.17018	0.0724409	-2.06035	-4.7595	-0.629063	hcmv-miR-UL148D
0.17031	0.0725451	2.05943	-4.76086	1.46424		no information
0.17049	0.0726691	2.05834	-4.76248	0.848447		no information
0.1707	0.0728037	-2.05716	-4.76424	-0.630462	hsa-miR-1276
0.1708	0.0728975	2.05634	-4.76545	0.776604		no information
0.17091	0.0729906	2.05553	-4.76666	1.49033		no information
0.17101	0.0731142	-2.05445	-4.76826	-0.75048		no information
0.17101	0.0731324	2.05429	-4.7685	0.590147		no information
0.17114	0.0732353	2.05339	-4.76983	0.72428	hsa-miR-3662
0.17141	0.0733993	2.05197	-4.77195	0.576594		no information
0.17156	0.0735103	-2.051	-4.77338	-0.84159		no information
0.17162	0.0736207	2.05004	-4.7748	0.916907	hsa-miR-4736
0.17162	0.0736623	-2.04968	-4.77533	-0.571075	hsa-miR-4722-3p
0.17162	0.0736829	2.0495	-4.7756	0.766416		no information
0.17168	0.0737876	2.0486	-4.77694	0.676758	hsa-miR-4259
0.17168	0.0738041	-2.04846	-4.77715	-0.660811	hsa-miR-1236-3p
0.1721	0.0740651	2.0462	-4.78049	0.641509	hsa-miR-769-5p
0.1721	0.0740833	-2.04605	-4.78072	-0.763885		no information
0.1726	0.0743687	2.04359	-4.78436	0.898875		no information
0.1726	0.074398	2.04334	-4.78473	0.77678	hsa-miR-548w
0.17289	0.0745702	-2.04186	-4.78692	-0.563658		no information
0.17289	0.0746203	-2.04144	-4.78755	-0.782625	hsa-miR-590-3p
0.17295	0.0746935	2.04081	-4.78848	0.816437	hsv1-miR-H4-5p
0.17351	0.074987	-2.03831	-4.79219	-0.751462		no information
0.17399	0.0752892	-2.03574	-4.79599	-0.545397	hsa-miR-4795-5p
0.17399	0.0752909	2.03572	-4.79601	0.820996	hsa-miR-4284
0.17412	0.0754416	-2.03445	-4.7979	-0.668747		no information
0.17412	0.0754737	2.03417	-4.7983	0.663708		no information
0.17412	0.0755326	-2.03368	-4.79904	-1.93777	hsa-miR-200b-3p
0.17412	0.075568	-2.03338	-4.79948	-0.600317		no information
0.17412	0.0755926	2.03317	-4.79978	0.949508	hsa-miR-4294
0.17456	0.0758328	2.03114	-4.80278	0.806949		control
0.17503	0.0760892	2.02899	-4.80597	0.656145		no information
0.17593	0.0765293	-2.0253	-4.81141	-0.573562	hsa-miR-523-3p
0.17611	0.076658	-2.02423	-4.813	-0.616736	hsa-miR-3915
0.17674	0.0770626	-2.02086	-4.81796	-0.605621		no information
0.17674	0.0770685	2.02082	-4.81804	1.09777	kshv-miR-K12-10a-5p
0.17674	0.0771312	2.0203	-4.8188	1.18162		no information
0.17674	0.0771792	-2.0199	-4.81939	-0.683115		no information
0.17687	0.0772869	-2.01901	-4.82071	-2.01674		no information
0.17692	0.0773608	-2.0184	-4.82161	-0.562751		no information
0.17717	0.0775195	-2.01709	-4.82354	-0.58371		no information
0.17726	0.0776069	-2.01637	-4.8246	-0.658961	hsa-miR-1249-3p
0.17748	0.0778095	-2.0147	-4.82706	-0.659739		no information
0.17748	0.0778239	-2.01458	-4.82724	-0.598853	hsa-miR-1306-5p
0.17748	0.0778542	2.01433	-4.8276	0.765327		no information
0.17824	0.0782763	-2.01088	-4.8327	-0.591963	hsa-miR-361-3p
0.17824	0.0782868	-2.01079	-4.83282	-0.670351	hsa-miR-2682-3p
0.17843	0.0784222	2.00968	-4.83445	1.49117		no information
0.1785	0.0785022	-2.00903	-4.83541	-0.65854	hsa-miR-4644
0.18087	0.0795988	2.00016	-4.84848	0.720731	hsa-miR-99b-3p
0.18143	0.0798945	1.99779	-4.85197	0.713251	hsa-miR-4427
0.18177	0.080146	-1.99578	-4.85492	-0.53084	hsa-miR-4472
0.18216	0.0803705	1.99399	-4.85755	0.581114	hsa-miR-5591-3p
0.18285	0.0807279	-1.99115	-4.86173	-0.585547		no information
0.18421	0.0814337	1.98557	-4.86991	0.787122		no information
0.18421	0.0814542	-1.98541	-4.87014	-0.522163	hsa-miR-675-3p
0.18421	0.0814826	-1.98519	-4.87047	-0.739022	hsa-miR-516a-3p/hsa-miR-516b-3p
0.18427	0.0815631	-1.98456	-4.8714	-0.609332	hsa-miR-4750-5p
0.18456	0.0817446	-1.98313	-4.87349	-0.643028	hsa-miR-3115
0.18458	0.0818027	-1.98268	-4.87416	-0.785574	hsa-miR-1229-3p
0.24822	0.123901	1.77903	-4.87599	0.801218		no information
0.18516	0.082111	1.98027	-4.87769	0.534421	hsa-miR-580-3p
0.18557	0.0823748	1.97821	-4.8807	0.731035	hsa-miR-5587-3p
0.18557	0.0824	1.97802	-4.88099	0.809649	hsa-miR-4500
0.1859	0.082597	-1.97649	-4.88323	-0.542812	hsa-miR-4739
0.18611	0.0827437	-1.97535	-4.8849	-0.727013		no information
0.18702	0.0832471	1.97147	-4.89059	0.734078		control
0.18702	0.0832556	-1.9714	-4.89068	-0.636348		no information
0.18753	0.0835349	1.96925	-4.89383	1.07456	hsa-let-7c-5p
0.18758	0.0836117	-1.96866	-4.89469	-0.935564	hsa-miR-3184-5p
0.20832	0.0971546	1.90588	-4.89763	0.891491	hsa-miR-1295b-3p
0.18824	0.0839654	-1.96596	-4.89865	-0.605322	hsa-miR-125a-3p
0.18824	0.0840097	1.96562	-4.89914	1.47908	hsa-miR-19b-2-5p
0.22835	0.111337	-1.85524	-4.90014	-0.927248	hsa-miR-4789-5p
0.18847	0.0841659	-1.96443	-4.90088	-0.529986	hsa-miR-1913
0.20904	0.0978453	-1.90111	-4.90429	-0.993682		no information
0.18955	0.0847037	-1.96035	-4.90685	-0.631566		no information
0.19006	0.0849845	1.95822	-4.90995	1.02364	hsa-miR-367-5p
0.19017	0.0850868	1.95745	-4.91108	1.02458		no information
0.19098	0.0855029	1.95432	-4.91565	2.02777		no information
0.19098	0.0855964	-1.95362	-4.91667	-0.572748		no information
0.19098	0.0856126	1.9535	-4.91685	0.918471		no information
0.19118	0.0857557	1.95243	-4.91841	0.804772	hsa-miR-92a-3p
0.19207	0.0862082	1.94905	-4.92334	0.831993	hsa-miR-660-5p
0.1926	0.0865033	1.94686	-4.92653	0.546321	hsa-miR-513c-3p
0.19316	0.0868366	-1.94439	-4.93013	-0.559324	hsa-miR-4451
0.19316	0.0868601	1.94422	-4.93038	0.79554	hsa-miR-19b-3p
0.19342	0.0870688	-1.94268	-4.93263	-0.549485	hsa-miR-4433a-5p
0.19342	0.0870885	-1.94253	-4.93284	-0.783819		no information
0.19352	0.0871888	-1.94179	-4.93392	-0.541417	hsa-miR-5699-3p
0.19352	0.087248	-1.94136	-4.93455	-0.565322		no information
0.19352	0.0872956	1.94101	-4.93506	0.938842	hsa-miR-135b-3p
0.19362	0.0873987	1.94025	-4.93616	1.11257	hsa-miR-617
0.19504	0.0880974	-1.93514	-4.94361	-0.622107	hsa-miR-520e
0.19504	0.088148	1.93477	-4.94414	0.893338	hsa-miR-514b-5p
0.19506	0.0882235	1.93422	-4.94494	1.18759	hsa-miR-3681-3p
0.19506	0.088267	1.9339	-4.9454	0.680254	hsa-miR-15a-3p
0.19514	0.0883574	-1.93324	-4.94636	-0.683181	hsa-miR-4419b
0.19529	0.0884827	1.93233	-4.94768	0.575942	hsa-miR-4761-3p
0.19541	0.0885912	1.93155	-4.94883	0.911129		no information
0.19558	0.0887263	-1.93057	-4.95025	-0.698867		no information
0.19559	0.0887832	1.93015	-4.95085	0.605617		no information
0.1956	0.0889011	-1.9293	-4.95209	-0.519856	hsa-miR-3675-3p
0.1956	0.0889155	-1.9292	-4.95224	-0.66327		no information
0.1956	0.0889535	1.92892	-4.95264	0.718601	hsa-miR-1225-5p
0.1959	0.0891463	-1.92753	-4.95466	-0.559665		no information
0.1961	0.0893093	1.92636	-4.95636	0.625807	hsa-miR-1912
0.1961	0.0893472	1.92609	-4.95676	1.39471	hsa-miR-551b-3p
0.1965	0.0896225	1.92411	-4.95963	0.997877	hsa-miR-432-5p
0.1965	0.0896408	-1.92398	-4.95982	-0.525136		no information
0.19651	0.0897028	1.92353	-4.96047	0.684621	hsa-miR-154-5p
0.1966	0.0898408	-1.92254	-4.9619	-0.670834	hsa-miR-622
0.1966	0.0898813	-1.92225	-4.96232	-0.573417	hsa-miR-371b-5p
0.1966	0.0899328	-1.92189	-4.96285	-0.544708		no information
0.1966	0.0899668	-1.92164	-4.96321	-0.562972		control
0.19677	0.0900984	1.9207	-4.96457	0.826984	hsa-miR-26a-1-3p
0.19776	0.0906086	1.91707	-4.96983	1.05424	hsa-miR-515-5p
0.19802	0.0907839	1.91583	-4.97164	0.799665		no information
0.19866	0.0911321	-1.91337	-4.9752	-0.561684		no information
0.1991	0.0913924	1.91153	-4.97786	0.740271	hsa-miR-1185-5p
0.26733	0.13865	1.69866	-4.97983	1.07318	hsa-miR-466
0.20014	0.0919642	1.90752	-4.98367	0.66436		no information
0.20014	0.0919801	-1.90741	-4.98383	-0.747353		no information
0.20035	0.0921334	1.90634	-4.98538	0.5015		control
0.2013	0.0926268	-1.9029	-4.99035	-0.516155	hsa-miR-506-5p
0.20177	0.0929019	-1.90099	-4.99311	-0.637558		no information
0.20201	0.0930685	1.89984	-4.99478	0.55913	hsa-miR-524-5p
0.20208	0.0932205	1.89879	-4.9963	0.608587	hsa-miR-4735-5p
0.20208	0.0932439	1.89862	-4.99653	0.597945	hsa-miR-150-5p
0.20208	0.09332	1.8981	-4.99729	0.697761		no information
0.20208	0.093327	1.89805	-4.99736	0.764685	hsa-miR-1273g-3p
0.20292	0.0937725	-1.89498	-5.00179	-0.576353	kshv-miR-K12-7-3p
0.20379	0.0942331	-1.89183	-5.00634	-0.56871		no information
0.20386	0.0943258	1.89119	-5.00726	0.771712		control
0.20439	0.0946268	-1.88914	-5.01022	-0.49963	hsa-miR-495-3p
0.2047	0.0948263	-1.88778	-5.01217	-1.08367		no information
0.20483	0.0950537	1.88624	-5.0144	0.803337	hsa-miR-330-3p
0.20483	0.0950588	-1.88621	-5.01445	-0.491657		no information
0.20483	0.0950608	1.88619	-5.01447	0.593595	hsa-miR-1228-5p
0.20515	0.0952709	1.88477	-5.01652	1.68853		no information
0.20625	0.0958623	-1.88078	-5.02226	-0.904214		no information
0.20625	0.0958969	1.88055	-5.0226	0.865661	hsa-miR-1251-5p
0.2067	0.0961632	-1.87876	-5.02517	-0.531211		no information
0.20725	0.0964773	-1.87666	-5.02819	-0.521678		no information
0.20791	0.0968442	-1.87421	-5.03171	-0.615241	hsa-miR-381-5p
0.20807	0.0969787	-1.87331	-5.033	-0.899296		no information
0.20848	0.0972863	1.87127	-5.03594	0.902647	hsa-miR-487a-3p
0.20904	0.0976732	1.86871	-5.03961	0.96576		control
0.20904	0.0977118	-1.86845	-5.03998	-0.521364	hsa-miR-642b-5p
0.20904	0.0977696	-1.86807	-5.04053	-1.03902		control
0.20904	0.097794	-1.86791	-5.04076	-1.08367	hsa-miR-128-1-5p
0.20924	0.0980045	1.86652	-5.04275	0.622506	hsa-miR-3145-5p
0.20924	0.0980559	-1.86618	-5.04324	-0.623993		no information
0.21	0.098469	-1.86347	-5.04713	-0.831057		no information
0.21064	0.0988283	1.86112	-5.0505	1.02029	hsa-miR-599
0.21079	0.0989692	1.8602	-5.05182	0.959423		no information
0.21079	0.0990417	1.85972	-5.0525	0.911294	hsa-miR-5090
0.21079	0.0990773	1.85949	-5.05283	0.489399	ebv-miR-BART10-3p
0.21102	0.0992465	1.85839	-5.05441	0.697761	hsa-miR-5590-3p
0.21112	0.0994793	1.85688	-5.05658	2.13624	hsa-miR-187-3p
0.21112	0.0994903	-1.85681	-5.05668	-0.508987		no information
0.21112	0.0995014	-1.85673	-5.05678	-0.52892	hsa-miR-1275
0.21112	0.0995353	-1.85651	-5.0571	-0.837747	hsa-miR-3196
0.21184	0.099944	-1.85387	-5.06089	-0.588084		no information
0.21184	0.0999927	-1.85355	-5.06134	-0.799523	hsa-miR-1282
0.21196	0.100109	1.8528	-5.06242	1.16135	hsa-miR-384
0.21229	0.100327	-1.85139	-5.06442	-0.566784		no information
0.23706	0.116384	-1.784	-5.06622	-1.22096		no information
0.21278	0.100616	1.84954	-5.06708	0.82596	hsa-miR-508-3p
0.21342	0.100978	1.84721	-5.07041	0.892041		no information
0.21357	0.101109	1.84637	-5.0716	0.945971		no information
0.21364	0.101261	-1.8454	-5.07299	-0.504312		no information
0.21364	0.101295	1.84519	-5.0733	0.531894		no information
0.21364	0.101341	-1.84489	-5.07372	-0.482919		no information
0.21364	0.101416	1.84441	-5.07441	0.521258	hsa-miR-636
0.21364	0.101444	-1.84423	-5.07466	-0.511092		no information
0.21437	0.101852	1.84164	-5.07836	0.639947	hsa-miR-148b-3p
0.21453	0.10199	1.84077	-5.07961	0.630923	hsa-miR-891b
0.21453	0.102053	1.84037	-5.08018	1.34343	hsa-miR-4742-5p
0.21464	0.102165	-1.83965	-5.0812	-0.681694		no information
0.21495	0.102459	1.8378	-5.08385	0.67813	hsa-miR-3155a/hsa-miR-3155b
0.21495	0.102528	-1.83736	-5.08447	-0.489112	hsa-miR-4683
0.21495	0.102546	1.83725	-5.08463	0.730479	ebv-miR-BART5-5p
0.21495	0.102553	1.8372	-5.08469	0.469127	hsa-miR-3191-5p
0.21498	0.102675	-1.83643	-5.08579	-0.641996		no information
0.21498	0.102688	1.83635	-5.0859	0.616101		no information
0.21559	0.103042	1.83413	-5.08908	0.675507		no information
0.21604	0.103336	-1.83228	-5.09171	-0.587233	hsa-miR-1827
0.21604	0.103381	-1.832	-5.09211	-0.869052		no information
0.21675	0.103815	1.82929	-5.09597	0.724781	hsa-miR-766-5p
0.21675	0.103841	1.82913	-5.0962	0.592814	hsa-miR-4474-3p
0.2187	0.104836	-1.82295	-5.10499	-0.662383		no information
0.21907	0.105076	-1.82147	-5.10709	-0.556182	hsa-miR-518a-5p/hsa-miR-527
0.21938	0.105289	-1.82016	-5.10896	-0.562379		no information
0.21988	0.105632	-1.81805	-5.11195	-0.672292	hsa-miR-4300
0.21988	0.105653	1.81792	-5.11213	1.20691		no information
0.21991	0.105726	1.81747	-5.11278	0.668617	hsa-miR-944
0.22054	0.106094	1.81522	-5.11597	0.597199	hsa-miR-548b-3p
0.22084	0.1063	1.81396	-5.11775	0.551959	hsa-miR-3920
0.22091	0.106395	1.81338	-5.11858	1.29612		no information
0.221	0.106504	1.81272	-5.11951	1.0746	hsa-miR-4802-3p
0.22105	0.106586	1.81222	-5.12023	1.13902	hsa-miR-30b-5p
0.22109	0.106672	1.8117	-5.12096	0.725567		control
0.22132	0.106844	1.81065	-5.12245	0.756263	hsa-miR-138-5p
0.22144	0.106966	1.80991	-5.1235	0.849423	hsa-miR-4696
0.22165	0.107126	1.80894	-5.12488	0.648067		no information
0.22233	0.107537	-1.80646	-5.12839	-0.575887		no information
0.22233	0.107585	-1.80617	-5.1288	-0.538545	hsa-miR-4725-3p
0.22376	0.108337	-1.80165	-5.1352	-0.5515		no information
0.22382	0.108432	-1.80107	-5.13601	-0.665043	hsa-miR-4466
0.22398	0.10857	1.80025	-5.13717	0.55625	hsa-miR-1258
0.22499	0.109148	1.79681	-5.14204	0.729227	hsa-miR-652-3p
0.22499	0.109186	1.79658	-5.14237	0.5958	hsa-miR-514b-3p
0.22609	0.109788	1.79301	-5.14741	0.698315	hsa-miR-25-3p
0.22612	0.109863	1.79256	-5.14803	0.611797	hsv2-miR-H11-5p
0.2272	0.110515	1.78872	-5.15346	0.57492	hsa-miR-373-5p
0.2272	0.110516	-1.78871	-5.15346	-0.68499	hsa-miR-4684-3p
0.22757	0.110761	1.78727	-5.1555	1.0675	hsa-let-7d-5p
0.22803	0.111049	-1.78558	-5.15788	-0.552334		no information
0.30637	0.169032	1.55619	-5.15969	0.878197	hsa-miR-4772-3p
0.22835	0.111337	1.7839	-5.16024	0.664649	hsa-miR-4476
0.22917	0.111798	1.78121	-5.16403	0.950758	hsv2-miR-H19
0.22925	0.111904	1.7806	-5.1649	0.518788		no information
0.30693	0.170195	1.55124	-5.16583	0.652173	hsa-miR-5579-5p
0.23044	0.112547	1.77687	-5.17015	0.811162	hsa-miR-5003-3p
0.23325	0.113989	1.76859	-5.18178	0.575909	hsa-miR-433-3p
0.23366	0.114253	-1.76708	-5.1839	-0.475313		no information
0.23447	0.114717	-1.76444	-5.1876	-0.686494	hsa-miR-4763-3p
0.23555	0.115313	-1.76106	-5.19233	-1.1118	hsa-miR-4538
0.23667	0.116026	1.75705	-5.19795	0.543524	hsa-miR-4669
0.23667	0.11605	1.75691	-5.19814	1.85672	hsa-miR-143-5p
0.23667	0.116098	1.75664	-5.19852	0.531358	hsa-miR-564
0.23667	0.116127	-1.75648	-5.19875	-0.587371		no information
0.23709	0.116469	-1.75456	-5.20143	-0.505745	hsa-miR-4426
0.23813	0.117047	-1.75133	-5.20595	-0.52253		no information
0.23857	0.117329	1.74976	-5.20814	0.499834		no information
0.23858	0.117402	1.74935	-5.20871	0.738282	hcmv-miR-UL22A-3p
0.31653	0.178845	-1.51534	-5.2101	-1.04716	hsa-miR-548f-3p
0.23893	0.117642	1.74802	-5.21057	0.62609	hsa-miR-759
0.23953	0.118005	-1.74602	-5.21337	-0.544543		no information
0.24042	0.118572	-1.74288	-5.21774	-0.555096	hsv1-miR-H6-3p
0.24042	0.118581	-1.74283	-5.21781	-0.500143		no information
0.24044	0.118658	1.74241	-5.2184	0.535816	hsa-miR-938
0.24239	0.119687	-1.73677	-5.22625	-0.657826		no information
0.24284	0.120032	-1.73489	-5.22887	-0.53508	hsa-miR-4800-3p
0.24284	0.120049	1.7348	-5.229	0.578501		no information
0.24291	0.120152	-1.73424	-5.22979	-0.525311	hsa-miR-4764-5p
0.24346	0.120541	1.73213	-5.23272	0.523015	hsa-miR-548al
0.24346	0.120559	1.73203	-5.23285	0.91042	hsa-miR-451b
0.24384	0.12082	-1.73062	-5.23482	-0.586912	hsa-miR-4800-5p
0.24402	0.120977	-1.72976	-5.236	-0.770083	hsa-miR-134-3p
0.24542	0.121741	1.72565	-5.24172	0.624394		no information
0.24551	0.121855	1.72504	-5.24257	0.459062		no information
0.24566	0.121995	1.72429	-5.24361	0.476501	hsa-miR-647
0.24627	0.122372	-1.72227	-5.24641	-0.51771	hsa-miR-4709-3p
0.24643	0.12252	-1.72148	-5.24751	-0.489445	hsa-miRPlus-A1015
0.24659	0.122669	1.72068	-5.24861	0.462828		no information
0.24752	0.123198	1.71786	-5.25252	0.769896	hsa-miR-3131
0.24776	0.12346	1.71647	-5.25444	0.796249		control
0.24776	0.123503	-1.71625	-5.25475	-0.480224		no information
0.24776	0.12353	-1.7161	-5.25495	-0.595648	hsv1-miR-H1-3p
0.24822	0.123828	1.71453	-5.25714	0.770127		no information
0.24825	0.123986	1.71369	-5.25829	0.51913	hsa-miR-4753-5p
0.32802	0.188909	1.47555	-5.25864	0.775501	hsa-miR-4435
0.24825	0.124092	1.71313	-5.25907	1.02022		no information
0.24825	0.124125	-1.71296	-5.25931	-0.605057		no information
0.24935	0.124743	1.7097	-5.26381	0.648066		no information
0.24946	0.12487	1.70904	-5.26473	0.594001		no information
0.24967	0.125046	-1.70811	-5.26601	-0.750512	hsa-miR-615-5p
0.25021	0.125435	-1.70607	-5.26882	-0.44935	hsa-miR-4446-5p
0.25021	0.125459	-1.70595	-5.26899	-0.690952	hsa-miR-3651
0.25042	0.125637	1.70502	-5.27028	0.979754	hsa-miR-5706
0.25053	0.125762	-1.70437	-5.27118	-0.465648		no information
0.25065	0.125891	-1.7037	-5.2721	-0.594271		no information
0.25107	0.126174	-1.70222	-5.27414	-0.692402	hsa-miR-4668-5p
0.25152	0.126474	1.70067	-5.27628	0.52167	hsa-miR-708-3p
0.25152	0.126542	-1.70032	-5.27676	-0.772957		no information
0.25174	0.126723	1.69938	-5.27806	0.842081	hsa-miR-4680-3p
0.25189	0.126869	1.69862	-5.2791	0.746564		no information
0.25204	0.127019	1.69785	-5.28017	0.587501		no information
0.25309	0.127618	-1.69476	-5.28442	-0.518039	hsa-miR-2116-5p
0.25364	0.127968	1.69296	-5.2869	1.28959	hsa-miR-146a-5p
0.25405	0.128246	-1.69154	-5.28886	-0.445303		no information
0.25414	0.128361	1.69095	-5.28967	0.454348		no information
0.25436	0.128615	1.68965	-5.29145	0.559367	hsa-miR-557
0.25436	0.128619	1.68963	-5.29148	0.513614	hsa-miR-324-5p
0.25504	0.129034	1.68752	-5.29438	0.690305		no information
0.25562	0.129398	-1.68567	-5.29693	-0.444207		no information
0.25565	0.129486	-1.68522	-5.29754	-0.48969	hsa-miR-610
0.25656	0.130022	1.68251	-5.30126	0.559784		no information
0.25711	0.13037	1.68075	-5.30367	0.583237	hsa-miR-127-5p
0.2572	0.130488	1.68015	-5.30449	0.816476	hsa-miR-3659
0.28286	0.151501	-1.6041	-5.30711	-0.974243	hsa-miR-561-3p
0.25809	0.131225	1.67645	-5.30957	1.39108	hsa-let-7f-5p
0.25809	0.131438	1.67538	-5.31103	0.728317	hsa-miR-875-5p
0.25809	0.131531	-1.67492	-5.31166	-0.457674		no information
0.25809	0.131549	-1.67483	-5.31179	-0.518193	hsa-miR-205-3p
0.25809	0.131576	-1.67469	-5.31197	-0.508773	hsa-miR-502-5p
0.25809	0.131576	-1.67469	-5.31198	-0.438491	hsa-miR-5580-3p
0.25809	0.13164	1.67437	-5.31241	0.518781	hsa-miR-3689f
0.25809	0.131641	-1.67437	-5.31241	-0.539109		no information
0.25809	0.131689	1.67413	-5.31274	0.761119	hsa-miR-219a-5p
0.25809	0.131721	1.67396	-5.31297	0.610347	kshv-miR-K12-11-3p
0.25809	0.131829	-1.67342	-5.31371	-0.883828		no information
0.25809	0.131879	1.67318	-5.31404	0.855085		no information
0.25809	0.131892	1.67311	-5.31414	0.602627		no information
0.25848	0.132163	1.67176	-5.31598	0.591078	hsa-miR-3689b-3p/hsa-miR-3689c
0.25861	0.132309	-1.67104	-5.31697	-0.524877	hsa-miR-5572
0.25861	0.132377	-1.6707	-5.31744	-0.587037	hsa-miR-874-5p
0.25862	0.132451	-1.67033	-5.31794	-0.4976	hsa-miR-1247-5p
0.25862	0.132527	-1.66995	-5.31846	-0.566592		no information
0.25867	0.132623	1.66947	-5.31911	0.53257	hsa-miR-4677-3p
0.25929	0.133018	1.66752	-5.32178	0.724756		no information
0.26008	0.133529	1.66499	-5.32523	0.908862		no information
0.26008	0.13357	1.66479	-5.32551	0.492299	hsa-miR-3667-5p
0.26021	0.133718	1.66406	-5.3265	0.721805		no information
0.26021	0.133784	-1.66373	-5.32695	-0.450529	hsa-miR-4481
0.287	0.154936	1.58866	-5.32726	0.697382		no information
0.26047	0.133988	1.66273	-5.32831	1.07925	hsa-miR-582-5p
0.26121	0.134445	1.66049	-5.33137	0.536384	hsa-miR-16-1-3p
0.26218	0.135019	1.65768	-5.3352	0.781963		no information
0.26344	0.135739	-1.65417	-5.33998	-0.505526		no information
0.26369	0.135971	1.65305	-5.34151	1.02169	hsa-miR-16-5p
0.26369	0.136021	1.6528	-5.34184	0.45907		no information
0.26373	0.136113	-1.65236	-5.34245	-0.49055		no information
0.26389	0.136286	-1.65152	-5.34358	-0.592361	hsa-miR-526b-3p
0.26389	0.136434	1.6508	-5.34456	0.828651		no information
0.26389	0.136478	-1.65059	-5.34485	-0.522172		no information
0.26389	0.136496	1.6505	-5.34497	0.483142		no information
0.26454	0.136905	1.64853	-5.34765	0.735719	hsa-miR-664b-5p
0.26459	0.137005	-1.64805	-5.34831	-0.46708	hsa-miR-5187-3p
0.26619	0.137909	1.64371	-5.35419	0.495223		no information
0.26733	0.138585	-1.64047	-5.35858	-0.500141		no information
0.26804	0.13914	-1.63783	-5.36215	-0.532142		no information
0.26804	0.139169	1.6377	-5.36234	0.995342	hsa-miR-2909
0.26828	0.139396	-1.63662	-5.3638	-0.485921	hsa-miR-4285
0.26828	0.139446	-1.63638	-5.36412	-0.588529	hsa-miR-454-5p
0.26886	0.139823	-1.6346	-5.36654	-0.633359	hsa-miR-328-5p
0.26934	0.140149	1.63306	-5.36862	0.781649		no information
0.26941	0.140265	1.63251	-5.36936	0.584246	hsa-miR-4316
0.26945	0.140389	1.63193	-5.37015	0.931757		no information
0.32383	0.185165	-1.49011	-5.37037	-0.713715		no information
0.26945	0.140437	-1.6317	-5.37045	-0.5077	hsa-miR-3940-5p
0.26971	0.140647	-1.63071	-5.37179	-0.603288		no information
0.2699	0.140825	1.62987	-5.37292	0.72519	hsa-miR-4662a-5p
0.27011	0.141008	-1.62902	-5.37408	-0.582704	hsa-miR-5190
0.27022	0.141145	1.62837	-5.37495	0.707794	hsa-miR-653-5p
0.27029	0.141316	-1.62757	-5.37603	-0.458952		no information
0.27029	0.141404	-1.62716	-5.37659	-0.507606	hsa-miR-520g-3p/hsa-miR-520h
0.27029	0.141412	-1.62712	-5.37663	-0.532598	hsa-miR-1273e
0.2711	0.141927	1.62472	-5.37988	0.61765	hsa-miR-26a-2-3p
0.2711	0.142001	1.62437	-5.38034	0.749696		no information
0.2711	0.142063	-1.62408	-5.38074	-1.61064	hsa-miR-31-5p
0.27128	0.142261	1.62316	-5.38198	0.479399	hsa-miR-3660
0.27128	0.142312	-1.62292	-5.3823	-0.568		no information
0.27132	0.142408	1.62248	-5.3829	0.508865		no information
0.27227	0.142982	1.61981	-5.38649	0.573658		no information
0.27246	0.143261	1.61852	-5.38823	0.991806		no information
0.27246	0.143277	1.61845	-5.38833	0.54685	hsa-miR-222-3p
0.27246	0.143317	-1.61826	-5.38858	-0.714966	hsa-miR-3656
0.27263	0.143481	1.61751	-5.3896	0.774352	hsa-miR-4666a-3p
0.27397	0.144263	1.6139	-5.39444	0.623494	hsa-miR-1303
0.27441	0.144572	1.61248	-5.39635	0.791127		no information
0.27515	0.14504	1.61034	-5.39923	0.483142		no information
0.27561	0.145363	-1.60887	-5.40121	-0.432367	hsa-miR-23a-5p
0.27597	0.145631	1.60764	-5.40285	0.708559	hcmv-miR-US33-3p
0.3065	0.169238	-1.5276	-5.40605	-1.16161		no information
0.27683	0.14616	-1.60524	-5.40608	-0.516936		no information
0.27684	0.146247	-1.60484	-5.40661	-0.51879		no information
0.27696	0.146385	1.60422	-5.40744	0.754129	hsa-miR-5088-5p
0.2775	0.146752	1.60255	-5.40967	0.833253	hsa-miR-301b-3p
0.27773	0.146952	-1.60165	-5.41088	-0.422007	hsa-miR-4501
0.27775	0.147039	1.60126	-5.41141	1.02874		control
0.27788	0.147213	1.60047	-5.41246	0.797615		no information
0.27788	0.147286	1.60014	-5.4129	1.15708		no information
0.27788	0.147346	1.59987	-5.41326	0.962277		no information
0.27869	0.147887	1.59743	-5.41652	0.574718		no information
0.27869	0.147929	1.59725	-5.41677	0.894753	hsa-miR-101-3p
0.27875	0.14804	-1.59675	-5.41744	-0.446486	hsa-miR-548as-3p
0.27935	0.14852	-1.5946	-5.42031	-0.510361		no information
0.27935	0.14859	-1.59428	-5.42073	-0.471609	hsa-miR-4258
0.27935	0.148596	1.59425	-5.42077	0.618345	hsa-miR-4639-5p
0.27982	0.148928	1.59277	-5.42275	0.65163	hsa-miR-3928-3p
0.27997	0.149172	1.59168	-5.4242	0.479226	hcmv-miR-US25-2-5p
0.27997	0.149198	-1.59157	-5.42435	-0.642935	hsa-miR-4327
0.27997	0.149311	-1.59106	-5.42503	-0.543752		no information
0.27997	0.149324	1.59101	-5.4251	0.488987	hsa-miR-5010-5p
0.28008	0.14946	-1.5904	-5.42591	-0.526374	hsa-miR-4507
0.28048	0.149847	1.58868	-5.4282	0.634949	hsa-miR-625-5p
0.28048	0.149891	1.58849	-5.42846	0.721548		no information
0.28048	0.149966	-1.58815	-5.42891	-0.478803		no information
0.28048	0.149993	-1.58803	-5.42907	-0.486087	hsa-miR-4787-5p
0.28138	0.150551	-1.58556	-5.43236	-0.453037	hsa-miR-1914-5p
0.31274	0.175111	1.50388	-5.43624	0.996503		no information
0.28271	0.151346	-1.58206	-5.43703	-0.585854	hsa-miR-1273f
0.283	0.151656	1.58069	-5.43884	0.959423	hsa-miR-496
0.28319	0.151839	1.57989	-5.43991	0.546733		no information
0.28376	0.152335	-1.57772	-5.4428	-0.480195	hsa-miR-4708-3p
0.28376	0.152343	-1.57768	-5.44285	-0.448163		no information
0.28376	0.152389	1.57748	-5.44311	0.671925		no information
0.28387	0.152587	-1.57662	-5.44426	-0.500424		no information
0.28387	0.152604	1.57654	-5.44436	0.516321	hsa-miR-130a-5p
0.28468	0.153121	1.57429	-5.44735	0.460296		no information
0.2849	0.153424	-1.57297	-5.4491	-0.515838		no information
0.2849	0.153443	-1.57289	-5.44921	-0.614161		no information
0.2849	0.15348	-1.57273	-5.44943	-0.444964	hsa-miR-675-5p
0.28508	0.153657	-1.57196	-5.45044	-0.469755	hsa-miR-4323
0.28676	0.154647	-1.56767	-5.45612	-0.712829		no information
0.287	0.154872	1.5667	-5.4574	0.700303	hsa-miR-939-5p
0.28727	0.155163	1.56545	-5.45906	0.439154	hsa-miR-3677-5p
0.31753	0.179855	-1.48525	-5.45979	-0.976348		no information
0.28812	0.155706	-1.56312	-5.46215	-0.945325	hsa-miR-2054
0.28862	0.156134	1.56129	-5.46457	0.505282	hsa-miR-181d-3p
0.28862	0.156136	1.56128	-5.46458	0.745855	hsa-miR-509-5p
0.28872	0.156357	-1.56033	-5.46583	-0.511529	hsa-miR-519e-5p
0.28872	0.156358	1.56033	-5.46583	0.501292	hsa-miR-4318
0.31831	0.181195	1.48006	-5.46632	0.614318		no information
0.2889	0.156534	1.55958	-5.46682	0.537544	hsa-miR-554
0.28906	0.156704	-1.55885	-5.46778	-0.707999		no information
0.28909	0.156803	-1.55843	-5.46834	-0.673588	hsa-miR-3613-3p
0.28976	0.157244	1.55655	-5.47082	0.780052	hsa-miR-933
0.29089	0.157943	1.55359	-5.47473	0.659818	hsa-miR-92b-5p
0.29173	0.158481	-1.55131	-5.47772	-0.513189		no information
0.29204	0.158734	1.55025	-5.47912	0.410672		no information
0.29513	0.160496	-1.54286	-5.48884	-0.596524	hsa-miR-296-3p
0.29577	0.160927	1.54106	-5.49119	0.828651	hsa-miR-216b-5p
0.29638	0.161341	-1.53934	-5.49345	-0.639298	hsa-miR-4436b-3p
0.29743	0.162	-1.53661	-5.49703	-0.415965		no information
0.29822	0.162512	-1.53449	-5.49981	-0.593261		no information
0.29871	0.162863	-1.53304	-5.5017	-0.69967		no information
0.29941	0.163328	1.53113	-5.5042	0.471534	hsv2-miR-H12
0.29958	0.163509	1.53039	-5.50517	0.554279	hsa-miR-425-5p
0.30021	0.163934	1.52865	-5.50744	1.24878	hsa-miR-3613-5p
0.30103	0.164466	1.52647	-5.51029	0.553282	hsa-miR-655-3p
0.30104	0.16456	1.52609	-5.51078	0.816504		no information
0.30153	0.164912	1.52465	-5.51266	0.459296		no information
0.3019	0.1652	-1.52348	-5.51419	-0.507953	hsa-miR-130b-3p
0.30218	0.16544	-1.52251	-5.51546	-0.643028		no information
0.3022	0.165536	1.52212	-5.51597	0.614074	hsa-miR-4419a
0.30264	0.165876	-1.52074	-5.51776	-0.618294	hsa-miR-132-5p
0.30264	0.165948	-1.52045	-5.51814	-0.49032		no information
0.30401	0.166783	-1.51707	-5.52253	-0.838016		no information
0.30416	0.166951	1.5164	-5.52341	0.525681		no information
0.30464	0.167323	1.5149	-5.52536	1.12466	hsa-miR-373-3p
0.30464	0.16747	-1.51431	-5.52612	-0.464244	hsa-miR-892a
0.30464	0.167477	-1.51428	-5.52616	-0.581467	hsa-miR-4297
0.30517	0.16788	1.51266	-5.52826	0.734414	hsa-miR-1323
0.30517	0.168	1.51218	-5.52889	0.60732	hsa-miR-4782-5p
0.30517	0.168023	1.51209	-5.52901	0.675812		no information
0.30517	0.168151	-1.51158	-5.52967	-0.55667	hsa-miR-520g-3p
0.30517	0.168197	-1.51139	-5.52991	-0.417004	hiv1-miR-TAR-5p
0.30552	0.168478	1.51027	-5.53137	0.545582	hsa-miR-30c-2-3p
0.3065	0.169326	-1.50689	-5.53575	-0.472839	hsa-miR-92a-2-5p
0.3065	0.169361	1.50675	-5.53594	0.488262	hsa-miR-548n
0.30693	0.169687	-1.50546	-5.53761	-0.41249	hsa-miR-1281
0.30693	0.1698	1.50501	-5.53819	0.611292		no information
0.30693	0.169878	-1.5047	-5.5386	-0.584442	hsa-miR-1307-3p
0.30693	0.170044	-1.50404	-5.53945	-0.503931		no information
0.30693	0.170089	1.50386	-5.53968	0.497824	hsa-miR-627-5p
0.30693	0.170209	1.50338	-5.54029	0.670453		no information
0.30811	0.170948	1.50046	-5.54407	0.638918		control
0.30885	0.171448	-1.4985	-5.54661	-0.61774		no information
0.30895	0.171801	-1.49711	-5.54841	-0.5232	hsa-miR-4658
0.30895	0.17182	-1.49704	-5.5485	-0.629293	hsa-miR-1260b
0.30895	0.171836	1.49697	-5.54858	0.484139		no information
0.30895	0.171855	1.4969	-5.54868	0.836107		no information
0.30996	0.1725	1.49437	-5.55194	0.626313	hsa-miR-4301
0.37061	0.227727	1.33835	-5.55259	0.572752	hsa-miR-548ah-3p/hsa-miR-548av-3p/hsa-miR-548o-3p
0.31102	0.173256	1.49142	-5.55575	0.579574	hsa-miR-339-3p
0.31102	0.173265	-1.49138	-5.55579	-0.413473	hsa-miR-1207-3p
0.31111	0.173406	-1.49083	-5.5565	-0.484477	hsa-miR-4634
0.3118	0.17388	1.48899	-5.55887	1.09035	hsa-miR-488-5p
0.31183	0.174034	1.48839	-5.55964	0.705662	hsa-miR-21-5p
0.31183	0.174069	-1.48825	-5.55982	-0.433497		no information
0.31215	0.174403	-1.48696	-5.56148	-0.431715	hcmv-miR-US5-1
0.31215	0.174498	-1.48659	-5.56196	-0.427251	hsa-miR-4308
0.31215	0.174515	1.48653	-5.56204	0.904801	hsa-miR-182-5p
0.31258	0.174855	-1.48521	-5.56373	-0.488433	kshv-miR-K12-5-3p
0.31258	0.17493	-1.48492	-5.5641	-0.52697		no information
0.41441	0.270689	1.20902	-5.5665	0.689183	hsa-miR-548x-3p
0.31314	0.175524	1.48263	-5.56705	0.442234	hsa-miR-550b-2-5p
0.31314	0.175582	1.48241	-5.56734	0.564903	hsa-miR-374b-5p
0.31314	0.175601	1.48233	-5.56743	0.388839	hsa-miR-3121-5p
0.3135	0.175945	-1.48101	-5.56913	-0.437471	hsa-miR-3117-3p
0.3135	0.17601	-1.48076	-5.56945	-0.419558	hsa-miR-638
0.3135	0.176068	1.48054	-5.56974	0.440298	hsa-miR-671-5p
0.31378	0.176311	-1.47961	-5.57093	-0.457756	ebv-miR-BART5-3p
0.31382	0.176423	-1.47917	-5.57148	-0.448387		no information
0.31533	0.177363	1.47558	-5.57609	0.511057	hsa-miR-3136-3p
0.31536	0.177466	-1.47519	-5.57659	-0.502841	hsa-miR-650
0.3155	0.177638	1.47453	-5.57744	1.0891	hsa-miR-452-3p
[truncated: 1,557 more rows]

## Sheet: log>2
adj.P.Val	P.Value	t	B	logFC	miRNA_ID_LIST	SPOT_ID
0.00582	1.002e-05	9.5522	4.05744	3.57701	hsa-miR-3910
0.00582	1.28e-05	9.24831	3.83064	4.39064	hsa-miR-4474-5p
0.00582	1.306e-05	9.22372	3.81192	3.42177	hsa-miR-4774-5p
0.00582	1.409e-05	9.13204	3.74163	2.58266	hsa-miR-3074-3p
0.00582	1.491e-05	9.06395	3.68892	3.07431	hsa-miR-3607-5p
0.00582	1.869e-05	8.79499	3.47635	2.72186	hsa-miR-34c-3p
0.00582	1.992e-05	8.72077	3.41646	2.51617	hsa-miR-5008-5p
0.00582	2.061e-05	8.68096	3.3841	2.76174	hsa-miR-499a-3p
0.00582	2.391e-05	8.50983	3.24318	2.62179	hsa-miR-4776-5p
0.00582	2.733e-05	8.35843	3.11599	3.81063	hsa-miR-5000-3p
0.00582	3.175e-05	8.19094	2.97248	4.03235	hsa-miR-5579-3p
0.00582	3.49e-05	8.08701	2.88189	3.66673	ebv-miR-BHRF1-2-5p
0.00582	3.79e-05	8.9208	2.82968	3.30077	hsa-miR-5692b/hsa-miR-5692c
0.00582	3.804e-05	7.99291	2.79886	3.89057	hsa-miR-4418
0.00648	4.774e-05	7.74918	2.57917	2.78676	hsa-miR-4714-3p
0.00648	4.982e-05	7.70416	2.53785	3.17988	hsa-miR-548au-3p
0.00648	5.314e-05	7.63646	2.47526	2.66861	hsa-miR-3132
0.0066	5.595e-05	7.58264	2.42512	2.92423	hsa-miR-4715-5p
0.00663	5.999e-05	7.5103	2.35719	2.46702	hsa-miR-4699-5p
0.00671	6.444e-05	7.4365	2.28724	2.62823	hsa-miR-4691-5p
0.00728	7.822e-05	7.23975	2.09752	2.57872	hsa-miR-342-3p
0.00755	8.721e-05	7.13099	1.99059	2.09255	hsa-miR-4801
0.00755	9.062e-05	7.09291	1.9528	3.07533	hsa-miR-214-5p
0.0076	9.451e-05	7.05144	1.91143	2.37385	hsa-miR-93-3p
0.00774	0.0001065	6.93442	1.79352	2.18198	hsa-miR-548v
0.00774	0.00010708	6.92914	1.78815	2.73104	hsa-miR-3140-3p
0.00774	0.00010711	6.92888	1.78788	2.62183	hsa-miR-323b-3p
0.00801	0.00011893	6.82758	1.6843	2.15016	hsa-miR-222-5p
0.00801	0.00011977	6.82084	1.67736	2.18589	hsa-miR-148b-5p
0.00801	0.00012248	6.79937	1.65522	3.04274	hsa-miR-494-3p
0.00801	0.0001232	6.79375	1.6494	2.74722	hsa-miR-5003-5p
0.00801	0.0001251	6.77904	1.63419	2.30225	hsa-miR-3664-3p
0.00801	0.00012757	6.76038	1.61484	2.60645	hsa-miR-3663-3p
0.00801	0.00013594	6.69984	1.55174	2.69933	ebv-miR-BART22
0.00801	0.00013818	6.68434	1.53551	4.02628	hsa-miR-187-5p
0.00842	0.00015254	6.59116	1.43725	2.7761	hsa-miR-3671
0.00934	0.00017959	6.43931	1.27457	2.2355	hsa-miR-4517
0.00967	0.00020234	6.3299	1.15538	2.05444	kshv-miR-K12-3-3p
0.01003	0.00021255	6.28512	1.10612	3.02991	hsa-miR-875-3p
0.01014	0.00021773	6.26332	1.08203	2.73703	hsa-miRPlus-A1087
0.0109	0.00025581	6.11865	0.92047	3.23914	hsa-miR-411-5p
0.01141	0.00027102	6.06737	0.86248	2.63444	hsa-miR-1266-5p
0.0125	0.00031098	5.9464	0.72417	2.27716	hsa-miR-98-3p
0.01252	0.00032145	5.91752	0.69083	2.02852	hsa-miR-3154
0.01258	0.00033425	5.8836	0.65152	2.24096	hsa-miR-421
0.01322	0.00038174	5.76909	0.51755	3.89017	hsa-miR-3168
0.01322	0.00038444	5.76306	0.51044	2.69216	hsa-miR-4520-3p
0.01322	0.00039246	5.74541	0.4896	2.88103	hsa-miR-379-5p
0.01322	0.00039359	5.74294	0.48668	2.19525	hsa-miR-33a-3p
0.01322	0.00039858	5.73221	0.47398	2.02029	hsa-miR-4652-5p
0.01322	0.00040735	5.71366	0.45199	2.08914	hsa-miR-3192-5p
0.0133	0.00041387	5.70016	0.43595	3.30755	hsa-miR-1197
0.0133	0.00041737	5.693	0.42744	2.61601	hsa-miR-539-3p
0.01453	0.00048732	5.56241	0.27076	2.6225	hsa-miR-1271-5p
0.01453	0.00048856	5.56029	0.2682	3.39745	ebv-miR-BART17-5p
0.01464	0.00049644	5.5469	0.25199	3.08609	hsa-miR-323b-5p
0.01573	0.00061632	5.76915	0.1751	2.66613	hsa-miR-4509
0.01475	0.00053684	5.4818	0.17276	2.46849	hsa-miR-196b-3p
0.015	0.00056258	5.44306	0.1253	2.09332	hsa-miR-4659b-5p
0.015	0.00056443	5.44036	0.12199	3.04642	hsa-miR-99a-3p
0.01551	0.00060041	5.38951	0.05933	2.31325	hsa-miR-567
0.01605	0.00066408	5.3072	-0.04293	2.05272	hsa-miR-4776-3p
0.01605	0.00067741	5.29106	-0.06311	2.62859	hsa-miR-95-3p
0.01605	0.00068924	5.27702	-0.08069	2.12692	hsa-miR-648
0.01605	0.00069411	5.27132	-0.08784	2.39761	hsa-miR-378i
0.01626	0.00070774	5.25559	-0.1076	2.78834	hsa-miR-455-3p
0.01644	0.00072718	5.23373	-0.13511	2.43149	hsa-miR-20a-3p
0.01644	0.00072954	5.23111	-0.13841	2.1443	hsa-miR-140-3p
0.01699	0.00076342	5.1946	-0.18454	2.49749	hsa-miR-377-3p
0.01706	0.00077412	5.18344	-0.19868	3.63478	hsa-miR-4711-5p
0.01706	0.00077879	5.17862	-0.20479	2.72363	hsa-miR-410-5p
0.01706	0.00078114	5.1762	-0.20786	2.89244	hsa-miR-301a-3p
0.01805	0.0008623	5.09739	-0.30838	2.27122	hsa-miR-302d-5p
0.01921	0.00094083	5.02847	-0.39706	2.17722	hsa-miR-1263
0.02036	0.00113203	5.20943	-0.43308	3.84248	hsa-miR-4779
0.02	0.00104013	4.94978	-0.49923	2.03355	hsa-miR-4293
0.02	0.00106796	4.92919	-0.52613	2.00636	hsa-miR-4321
0.0201	0.00107931	4.92097	-0.53689	2.31273	hsa-miR-4291
0.02024	0.00109308	4.9111	-0.54981	2.37104	hsa-miR-214-3p
0.02036	0.00113075	4.88481	-0.58433	3.72479	hsa-miR-4457
0.02109	0.00124511	4.81045	-0.68252	2.51996	hsa-miR-101-5p
0.02201	0.00136077	4.74243	-0.77309	2.73046	hsa-miR-199a-3p/hsa-miR-199b-3p
0.02201	0.00136111	4.74224	-0.77335	2.08583	hsa-miR-3129-5p
0.02201	0.00138263	4.73028	-0.78935	3.48295	hsa-miR-4522
0.0222	0.00146459	4.68652	-0.84809	2.32856	hsa-miR-329-3p
0.02267	0.00156328	4.63722	-0.91462	2.81766	hsa-miR-181c-5p
0.02328	0.00164326	4.59968	-0.96553	2.60459	hsa-miR-9-5p
0.02353	0.00167501	4.58532	-0.98506	2.56124	hsa-miR-335-5p
0.02356	0.00168503	4.58085	-0.99115	2.11743	hsa-let-7i-3p
0.02372	0.00172972	4.56126	-1.01786	2.11136	hsa-miR-628-5p
0.02394	0.00177948	4.54008	-1.04681	2.20146	hsa-miR-199a-5p
0.0245	0.00186249	4.50614	-1.09335	3.05407	hsa-miR-215-5p
0.02538	0.002037	4.43982	-1.18478	2.43561	hsa-miR-4317
0.02574	0.00207329	4.4268	-1.20281	2.14028	hsa-miR-152-3p
0.028	0.00233453	4.33977	-1.32397	2.5784	hsa-miR-525-5p
0.02994	0.00282635	4.43278	-1.35888	2.65983	hsa-miR-5702
0.02916	0.00254995	4.27557	-1.41409	2.44381	hsa-miR-4757-3p
0.02916	0.00257684	4.26797	-1.4248	2.04382	hsa-miR-10a-5p
0.03071	0.00304777	4.3719	-1.43557	2.42895	hsa-miR-5707
0.02927	0.00269834	4.23466	-1.47184	2.10858	hsa-miR-188-3p
0.02955	0.00273919	4.22382	-1.48718	2.50374	hsa-miR-3919
0.02994	0.00282434	4.20178	-1.51843	3.94326	hsa-miR-5186
0.03071	0.00300292	4.15779	-1.58102	2.59012	hsa-miR-34b-5p
0.03098	0.0031259	4.1291	-1.62199	2.21217	hsa-miR-412-3p
0.03148	0.00325954	4.09926	-1.66472	2.33982	hsa-miR-517-5p
0.03474	0.00392799	4.17029	-1.69378	3.26724	hsa-miR-4438
0.03224	0.00340786	4.06765	-1.71013	3.14172	hsa-miR-1289
0.03503	0.00411997	4.13291	-1.74238	2.33975	hsa-miR-4804-5p
0.03308	0.00359947	4.02893	-1.76595	2.69454	hsa-miR-100-5p
0.03474	0.00390094	3.97228	-1.84801	2.28301	hsa-miR-199b-5p
0.03495	0.00402976	3.94948	-1.88114	2.21017	hsa-miR-497-5p
0.03495	0.00403053	3.94935	-1.88134	2.20778	hsa-miR-15a-5p
0.03498	0.00406535	3.94332	-1.89011	2.90186	hsa-miR-218-5p
0.03503	0.00413896	3.93076	-1.90841	2.47908	hsa-miR-4762-3p
0.03503	0.0041483	3.92919	-1.91071	2.44319	hsa-miR-20a-5p
0.03548	0.0042422	3.91355	-1.93353	2.3046	hsa-miR-570-3p
0.03666	0.00458531	3.85938	-2.01282	2.55672	hsa-miR-195-5p
0.03675	0.00463186	3.85237	-2.02312	2.04785	hsa-miR-4423-3p
0.04586	0.00706387	3.9475	-2.06251	2.18647	hsa-miR-621
0.03891	0.00514754	3.77937	-2.13067	2.46728	hsa-miR-202-3p
0.04411	0.00635178	3.63548	-2.34462	2.3417	hsa-miR-4668-3p
0.04441	0.00647658	3.62226	-2.3644	2.26258	hsa-miR-3973
0.04458	0.00658553	3.61094	-2.38136	2.09891	hsa-miR-4717-3p
0.0484	0.00804421	3.62491	-2.42395	2.26228	hsa-miR-4751
0.04883	0.00815738	3.6146	-2.43817	2.64578	hsa-miR-548aq-5p
0.05234	0.00914886	3.5304	-2.55489	2.06234	hsa-miR-1245b-5p
0.04823	0.00793441	3.48524	-2.57062	2.69099	hsa-miR-454-3p
0.04883	0.00815321	3.46701	-2.59821	2.16162	ebv-miR-BART3-3p
0.05015	0.00851952	3.4376	-2.64278	2.08312	hsa-miR-889-3p
0.06096	0.0115956	3.35872	-2.79573	2.05767	hsa-miR-3691-3p
0.05827	0.0109024	3.27391	-2.89243	2.24778	hsa-miR-3139
0.06075	0.0115037	3.23855	-2.94666	2.0228	hsa-miR-4797-3p
0.06239	0.0121674	3.20171	-3.00327	2.90327	hsa-miR-190a-5p
0.06288	0.0124117	3.18868	-3.02332	2.05137	hsa-miR-23c
0.0641	0.0131902	3.14887	-3.08464	3.22351	hsa-miR-133a-5p
0.06765	0.0146849	3.07889	-3.19267	2.11877	hsa-miR-223-5p
0.06772	0.0148677	3.07084	-3.20511	2.51698	hsa-miR-374a-3p
0.06772	0.0148905	3.06985	-3.20665	2.53133	hsa-miR-3658
0.07056	0.0160538	3.02103	-3.2822	3.26804	hsa-miR-4770
0.07428	0.0176968	2.958	-3.3799	2.10076	hsa-miR-135b-5p
0.07695	0.0187911	2.91931	-3.43995	2.12472	hsa-miR-32-5p
0.0801	0.020512	2.86294	-3.5275	2.04494	hsa-miR-1297
0.08172	0.0212769	2.83944	-3.56403	2.14461	hsa-miR-28-5p
0.08192	0.0215411	2.83152	-3.57634	2.44059	hsa-miR-196b-5p
0.09244	0.026442	2.70044	-3.78011	2.16732	hsa-miR-374a-5p
0.09686	0.0284272	2.6543	-3.85178	2.06858	hsa-miR-19a-5p
0.09756	0.029032	2.64089	-3.8726	2.42556	hsa-miR-145-3p
0.10729	0.034147	2.53774	-4.03254	2.13349	hsa-miR-1205

## Sheet: log<-2
adj.P.Val	P.Value	t	B	logFC	miRNA_ID_LIST	SPOT_ID
0.03123	0.00317722	-4.11748	-1.63861	-2.53225	hsa-miR-122-5p
0.03812	0.0049839	-3.80166	-2.09776	-2.13758	hsa-miR-375
0.12294	0.0435538	-2.38343	-4.27055	-2.37162	hsa-miR-200c-3p
