# Supplementary material for: Comprehensive Analysis of a circRNA-miRNA-mRNA Network to Reveal Potential Inflammation-Related Targets for Gastric Adenocarcinoma
Source: Mediators Inflamm. 2020 Aug 1;2020:9435608. doi: 10.1155/2020/9435608 (PMC7416288; doi:10.1155/2020/9435608)
Supplement: Supplementary 5 — Table S5: circRNA-related miRNAs. [file 9435608.f5.xls]

## Sheet: Sheet1
DE circRNAs	Predicted miRNAs
hsa_circ_0001789	hsa-miR-1208
	hsa-miR-1243
	hsa-miR-1246
	hsa-miR-1248
	hsa-miR-1286
	hsa-miR-1288
	hsa-miR-1290
	hsa-miR-1305
	hsa-miR-140-3p
	hsa-miR-149
	hsa-miR-548g
	hsa-miR-578
	hsa-miR-583
	hsa-miR-658
	hsa-miR-890
hsa_circ_0052001	hsa-miR-1184
	hsa-miR-1204
hsa_circ_0002570	hsa-miR-1231
	hsa-miR-1243
	hsa-miR-1246
	hsa-miR-1261
	hsa-miR-136
	hsa-miR-140-3p
	hsa-miR-326
	hsa-miR-330-5p
	hsa-miR-346
	hsa-miR-383
	hsa-miR-432
	hsa-miR-513a-5p
	hsa-miR-516b
	hsa-miR-545
	hsa-miR-587
	hsa-miR-1270
	hsa-miR-620
	hsa-miR-630
	hsa-miR-651
	hsa-miR-660
	hsa-miR-885-5p
	hsa-miR-889
	hsa-miR-935
hsa_circ_0045602	hsa-miR-1184
	hsa-miR-1203
	hsa-miR-1248
	hsa-miR-1264
	hsa-miR-198
	hsa-miR-370
	hsa-miR-375
	hsa-miR-513a-5p
	hsa-miR-619
	hsa-miR-659
	hsa-miR-877
	hsa-miR-942
hsa_circ_0034398	hsa-miR-1238
	hsa-miR-1253
	hsa-miR-1272
	hsa-miR-1322
	hsa-miR-136
	hsa-miR-182
	hsa-miR-197
	hsa-miR-486-3p
	hsa-miR-615-3p
	hsa-miR-665
	hsa-miR-766
hsa_circ_0003146	hsa-miR-1234
	hsa-miR-1272
	hsa-miR-1276
	hsa-miR-147b
	hsa-miR-197
	hsa-miR-210
	hsa-miR-339-3p
	hsa-miR-370
	hsa-miR-486-3p
	hsa-miR-523
	hsa-miR-589
	hsa-miR-604
	hsa-miR-653
	hsa-miR-766
	hsa-miR-933
hsa_circ_0006089	hsa-miR-1206
	hsa-miR-1286
	hsa-miR-1288
	hsa-miR-203
	hsa-miR-217
	hsa-miR-223
	hsa-miR-324-5p
	hsa-miR-330-3p
	hsa-miR-361-3p
	hsa-miR-432
	hsa-miR-488
	hsa-miR-507
	hsa-miR-557
	hsa-miR-515-5p
	hsa-miR-566
	hsa-miR-586
	hsa-miR-598
	hsa-miR-616
	hsa-miR-646
	hsa-miR-657
	hsa-miR-766
	hsa-miR-942
hsa_circ_0088485	hsa-miR-1234
	hsa-miR-1248
	hsa-miR-1299
	hsa-miR-198
	hsa-miR-335
	hsa-miR-338-3p
	hsa-miR-450b-3p
	hsa-miR-769-3p
	hsa-miR-486-3p
	hsa-miR-503
	hsa-miR-644
	hsa-miR-663b
	hsa-miR-940
hsa_circ_0004339	hsa-miR-1205
	hsa-miR-1231
	hsa-miR-1236
	hsa-miR-1238
	hsa-miR-1248
	hsa-miR-1253
	hsa-miR-1277
	hsa-miR-1287
	hsa-miR-1304
	hsa-miR-149
	hsa-miR-184
	hsa-miR-224
	hsa-miR-330-3p
	hsa-miR-370
	hsa-miR-450b-3p
	hsa-miR-769-3p
	hsa-miR-492
	hsa-miR-545
	hsa-miR-548g
	hsa-miR-548l
	hsa-miR-548m
	hsa-miR-561
	hsa-miR-577
	hsa-miR-579
	hsa-miR-580
	hsa-miR-607
	hsa-miR-1270
	hsa-miR-620
	hsa-miR-626
	hsa-miR-636
	hsa-miR-638
	hsa-miR-640
	hsa-miR-654-3p
	hsa-miR-668
	hsa-miR-874
	hsa-miR-942
hsa_circ_0007094	hsa-miR-1205
	hsa-miR-1236
	hsa-miR-140-3p
	hsa-miR-382
	hsa-miR-409-3p
	hsa-miR-431
	hsa-miR-520g
	hsa-miR-520h
	hsa-miR-548k
	hsa-miR-548l
	hsa-miR-548p
	hsa-miR-558
	hsa-miR-586
	hsa-miR-593
	hsa-miR-618
	hsa-miR-635
	hsa-miR-657
	hsa-miR-766
hsa_circ_0051246	hsa-miR-155
	hsa-miR-198
	hsa-miR-223
	hsa-miR-338-3p
	hsa-miR-375
	hsa-miR-576-5p
	hsa-miR-578
	hsa-miR-1827
	hsa-miR-885-3p
hsa_circ_0002019	hsa-miR-1184
	hsa-miR-1224-3p
	hsa-miR-1257
	hsa-miR-1280
	hsa-miR-1287
	hsa-miR-136
	hsa-miR-583
	hsa-miR-589
	hsa-miR-604
	hsa-miR-605
	hsa-miR-647
hsa_circ_0007613	hsa-miR-1182
	hsa-miR-1184
	hsa-miR-1205
	hsa-miR-127-5p
	hsa-miR-346
	hsa-miR-490-5p
	hsa-miR-516a-5p
	hsa-miR-549
	hsa-miR-566
	hsa-miR-602
	hsa-miR-623
hsa_circ_0031027	hsa-miR-1182
	hsa-miR-1248
	hsa-miR-1250
	hsa-miR-186
	hsa-miR-194
	hsa-miR-338-3p
	hsa-miR-375
	hsa-miR-543
	hsa-miR-558
	hsa-miR-566
	hsa-miR-577
	hsa-miR-587
	hsa-miR-619
	hsa-miR-629
	hsa-miR-634
	hsa-miR-636
	hsa-miR-640
	hsa-miR-646
	hsa-miR-766
hsa_circ_0007380	hsa-miR-1227
	hsa-miR-1322
	hsa-miR-450b-3p
	hsa-miR-769-3p
	hsa-miR-513a-3p
	hsa-miR-526b
	hsa-miR-599
	hsa-miR-595
	hsa-miR-638
	hsa-miR-644
hsa_circ_0001866	hsa-miR-1178
	hsa-miR-1200
	hsa-miR-1287
	hsa-miR-1290
	hsa-miR-1299
	hsa-miR-31
	hsa-miR-330-3p
	hsa-miR-331-3p
	hsa-miR-361-3p
	hsa-miR-382
	hsa-miR-421
	hsa-miR-510
	hsa-miR-512-5p
	hsa-miR-516b
	hsa-miR-543
	hsa-miR-558
	hsa-miR-581
	hsa-miR-587
	hsa-miR-639
	hsa-miR-659
hsa_circ_0004370	hsa-miR-1184
	hsa-miR-1200
	hsa-miR-1228
	hsa-miR-1236
	hsa-miR-1281
	hsa-miR-1286
	hsa-miR-1294
	hsa-miR-1304
	hsa-miR-139-3p
	hsa-miR-361-3p
	hsa-miR-572
	hsa-miR-604
	hsa-miR-621
	hsa-miR-639
	hsa-miR-647
	hsa-miR-648
	hsa-miR-665
	hsa-miR-941
	hsa-miR-942
hsa_circ_0008615	hsa-miR-1203
	hsa-miR-1206
	hsa-miR-1234
	hsa-miR-1299
	hsa-miR-140-3p
	hsa-miR-198
	hsa-miR-223
	hsa-miR-615-5p
	hsa-miR-665
	hsa-miR-766
hsa_circ_0005051	hsa-miR-136
	hsa-miR-330-3p
	hsa-miR-578
	hsa-miR-586
	hsa-miR-605
	hsa-miR-607
	hsa-miR-622
	hsa-miR-651
	hsa-miR-887
hsa_circ_0004228	hsa-miR-1231
	hsa-miR-127-5p
	hsa-miR-1324
	hsa-miR-370
	hsa-miR-548b-3p
	hsa-miR-579
	hsa-miR-623
	hsa-miR-654-3p
	hsa-miR-7
	hsa-miR-887
hsa_circ_0008768	hsa-miR-1206
	hsa-miR-1286
	hsa-miR-1288
	hsa-miR-203
	hsa-miR-217
	hsa-miR-223
	hsa-miR-324-5p
	hsa-miR-330-3p
	hsa-miR-361-3p
	hsa-miR-432
	hsa-miR-488
	hsa-miR-507
	hsa-miR-557
	hsa-miR-515-5p
	hsa-miR-543
	hsa-miR-566
	hsa-miR-586
	hsa-miR-598
	hsa-miR-616
	hsa-miR-629
	hsa-miR-639
	hsa-miR-646
	hsa-miR-657
	hsa-miR-661
	hsa-miR-766
	hsa-miR-942
hsa_circ_0055521	hsa-miR-1197
	hsa-miR-1264
	hsa-miR-1303
	hsa-miR-1825
	hsa-miR-526b
	hsa-miR-567
	hsa-miR-576-3p
	hsa-miR-578
	hsa-miR-582-3p
	hsa-miR-671-5p
	hsa-miR-885-3p
	hsa-miR-890
hsa_circ_0007404	hsa-miR-1182
	hsa-miR-186
	hsa-miR-338-3p
	hsa-miR-375
	hsa-miR-543
	hsa-miR-577
	hsa-miR-587
	hsa-miR-646
	hsa-miR-766
hsa_circ_0005217	hsa-miR-1184
	hsa-miR-1204
	hsa-miR-1234
	hsa-miR-1263
	hsa-miR-1287
	hsa-miR-1288
	hsa-miR-182
	hsa-miR-338-3p
	hsa-miR-502-5p
	hsa-miR-548c-3p
	hsa-miR-574-5p
	hsa-miR-595
	hsa-miR-648
	hsa-miR-660
	hsa-miR-663b
	hsa-miR-766
	hsa-miR-767-3p
hsa_circ_0003192	hsa-miR-1197
	hsa-miR-1206
	hsa-miR-1238
	hsa-miR-1246
	hsa-miR-1248
	hsa-miR-1281
	hsa-miR-1287
	hsa-miR-1289
	hsa-miR-1298
	hsa-miR-1299
	hsa-miR-1825
	hsa-miR-217
	hsa-miR-326
	hsa-miR-330-5p
	hsa-miR-337-3p
	hsa-miR-421
	hsa-miR-488
	hsa-miR-508-3p
	hsa-miR-513a-5p
	hsa-miR-515-5p
	hsa-miR-543
	hsa-miR-548p
	hsa-miR-584
	hsa-miR-587
	hsa-miR-589
	hsa-miR-598
	hsa-miR-607
	hsa-miR-616
	hsa-miR-626
	hsa-miR-649
	hsa-miR-653
	hsa-miR-661
	hsa-miR-891a
hsa_circ_0013048	hsa-miR-1208
	hsa-miR-1165
	hsa-miR-1247
	hsa-miR-1248
	hsa-miR-1287
	hsa-miR-1289
	hsa-miR-1291
	hsa-miR-1306
	hsa-miR-140-4p
	hsa-miR-150
	hsa-miR-549g
	hsa-miR-579
	hsa-miR-584
	hsa-miR-658
	hsa-miR-284
