# Supplementary material for: Comprehensive Analysis of a circRNA-miRNA-mRNA Network to Reveal Potential Inflammation-Related Targets for Gastric Adenocarcinoma
Source: Mediators Inflamm. 2020 Aug 1;2020:9435608. doi: 10.1155/2020/9435608 (PMC7416288; doi:10.1155/2020/9435608)
Supplement: Supplementary 6 — Table S6: miRNA-related mRNAs. [file 9435608.f6.xls]

## Sheet: Sheet1
selected miRNAs	miRNA-related mRNAs
hsa-miR-375	TIMM8A	ESPNL	TGFB2	NAT10	CLDN1	AXL	PEBP1	SLC35A3	PGM2	ZNF540	AMMECR1	CALU	ZNF785	EBPL	RPN1	XIAP
	MTPN	BSN	MRE11	CCDC59	SERTAD2	SEC24C	TMEM170A	NOLC1	RMDN3	PROCR	VASN	RPGR	COL12A1	TTC7B	RB1CC1	TFRC
	PDK1	APH1B	TGM2	C1GALT1	PTPN12	CRABP2	SESN1	UBE3A	CARD8	SNPH	CDR2	PPP1R2	TMX3	CRIM1	LEPROTL1	SEC24A
	USP1	ZBTB8A	TNFSF13	METTL2B	BIRC3	MKRN1	IQCE	STRBP	SKA2	LITAF	DCUN1D4	CCDC88B	PIK3IP1	MYBL1	KCNQ2	ZNF799
	MXI1	TNPO3	CPOX	STX6	NUS1	PAQR8	SET	NXT2	CMAS	CHGB	WWC1	TMED8	OXNAD1	ODF2	TP53	FAM196B
	JAK2	TBC1D5	IGFBP3	ENOPH1	PSIP1	NPPB	CMTM4	RPGRIP1L	NRBP1	PCGF5	NLE1	CRLF1	IFIT1	PHF20L1	ERBB2	NCAPG2
	ADIPOR2	SYNCRIP	BAK1	CNN3	CHSY1	CTDSP2	TMTC4	CBWD3	EFTUD2	FAH	MPP5	EMP1	MREG	CEP57L1	IGF1R	FAM200B
	INSM1	DGLUCY	AQP11	SNX25	MINDY2	PAFAH2	MNS1	SGMS2	FOLR1	PRRT3	CDKN2B	WDR1	ARL2BP	PRKCA	PIK3CA	TAF2
	C1QBP	PHLDA1	WTAP	VGLL4	UNC13B	TBX19	PRDX1	SAMD4A	MLEC	SERP1	UXS1	FSTL3	REEP3	USP31	PHLPP1	BCAS2
	AHR	TRMT10A	NAGPA	OGFOD1	SLC35B4	KHK	MR1	PRKX	DNMT3B	F3	CTSC	SIPA1L3	SCLY	NUMB	MYC	ZNF470
	PLAG1	NIN	TMEM25	GATAD1	EIF2S1	SLC39A11	CEP44	XPR1	APPL2	ZDHHC11	SH3BP4	SLC4A1AP	DISP2	SETD7	TRIM66	AP3B1
	RASD1	MED8	EIF4EBP2	PIP4P2	TSC22D2	SUB1	COX20	INSIG2	RTN2	ZNF571	FYTTD1	NDST1	NELFCD	EEA1	CCDC115	TNS1
	YY1AP1	SAMD11	RIDA	EBAG9	SUZ12	DOK7	CENPF	MBD2	BOD1L1	CEP19	ABI2	CCDC32	METTL2A	CELF2	UBN2	LRP5
	ELAVL4	GATA6	GTPBP4	CKAP2	RASSF8	CYP2U1	TIMM17A	AHCYL1	ITIH4	ANKRD1	TMED5	IL17RA	FAM126B	PAFAH1B1	SLC7A1	CTNNB1
	YAP1	CTGF	SP110	NSFL1C	AGTPBP1	FBXO8	BAZ1A	TMEM106B	THRA	HOMER2	B3GALNT1	BDH2	NUDT21	EXT1	NUFIP2	DEPTOR
	MTDH	ZFP91	RIMS3	PTPMT1	PAPD4	ABHD4	DNAH11	AEBP2	SFT2D2	CBWD2	CUL5	RAPGEF1	RDH11	UGCG	G2E3	MST1R
	SP1	ENAH	GPR157	DGKD	CSTF2	ARNTL2	KLHL7	ACSL3	PPCS	PSME4	STK38L	KCNN4	CEP70	TPR	NUP54	SOX2-OT
	MAP3K8	UBLCP1	SGO2	TNS3	RBPJ	ERP44	GOLGA4	LDHB	SH3D19	CORO1C	FZD4	KRT8	NETO2	JPT1	PHACTR2	SOX2
	FZD8	RAB10	SYT15	MAP2K4	IFT80	ZNF614	LHFPL2	SPAG9	IDNK	PHTF2	RAB6A	ARHGAP11A	SLC7A6	TOR1AIP2	ADAT2	STAT3
	RRAGB	SNAPC1	RRAGC	AZI2	ZFP36L2	SNRPA1	SENP1	PLEKHA3	CHPT1	DPY19L1	SPRED1	ALMS1	GDAP1	OTX1	HOXB3	MAPK3
	TAF3	DNAJC2	STPG1	PDGFC	LSM12	DUT	AKAP7	C12orf29	CHPF	HERPUD1	BCL10	SDC1	CEP128	IL1RAP	ELAVL2	GPHN
	TPRG1L	GSC	LMAN2	OPA1	RLF	CFL2	GAS8	POC1B	SLC25A42	PTPN1	EMC3	CRLF3	ELL2	DPYSL3	CBX3	MALAT1
	USP10	CCDC88A	HOXB13	OSBPL8	EIF4G3	BATF2	CDCA7L	PTP4A2	KIAA0513	RCN2	TCF12	VPS37D	SLC6A6	ACSL4	BBS10	RUNX3
	EXO1	KLHDC8B	PRDX3	CYP20A1	PARP1	RBBP8	USP46	DLG4	CREB3	SEMA3C	PHF3	LIMD2	EFNB2	CXADR	SDCCAG3	MYCN
	KLK10	UCHL3	GFM2	NUP58	CAB39	MOSPD3	PPP2R3C	ITGB1	LYPD5	PUDP	DIP2C	SLC25A15	DUSP6	SEC23A	MAP3K21	KLF4
	DNAJC8	JAG1	RPN2	HEY1	MIR17HG	TMEM74B	ZC3HAV1	KMT5A	FKBP1A	STX3	CIP2A	RAB3D	KIAA1191	HSP90AA1	DEK	ARHGDIA
	GALM	PIGB	ZBED1	RHOQ	IFT46	ZNF404	KCTD10	CASP3	HK2	KPNA4	EIF2AK2	TNNI3	ATG7	WWC2	TRPS1	SON
	BCL2L11	EXOC6	FKBP1B	KDSR	PBXIP1	PEX11B	RAP2C	CDC42	AGPAT5	MAT2B	BCL2	DR1	NSD3	NT5C2	MAL2	ATOH8
	IFI6	DESI1	KIAA0232	RAB3B	FAM89A	FAM3C	VEZT	YWHAZ	TMEM145	RAB28	NCAM1	LPCAT1	DAZAP2	NCOA7	SPOP	REEP5
	TIMM9A	ESPNL	TGFB3	NAT11	GRPEL2	STAP2	ZFHX2	MAPKAP1	FAM96A	RPUSD4	RHOA	DCTN5	COG2	C15orf41	ICOSLG	WFDC6
hsa-miR-140-3p	NRIP1	MTDH	CDCA4	TBC1D15	GGT7	KIAA0907	ITGA6	GLMP
	RAB31	WEE1	CDC25A	SENP3	NANOS1	IER3IP1	MARCKSL1	GPRIN2
	INTS14	NWD1	CABLES1	HNRNPA2B1	MOBP	VKORC1L1	COL4A1	HMGN2
	DNAJC9	COMMD2	BCL2L2-PABPN1	GRAMD4	DDA1	TNPO1	GPC1	ITGA10
	ACVR2B	CDK6	BCAT1	DDAH1	ZNF460	SERINC3	FN1	KIF5A
	PITPNB	KSR1	AP2M1	ATP8B1	MKKS	RPS24	ATP8A1	LAMP2
	ABL2	EVX2	CORO7	GDNF	TMEM78	PDS5A	ADGRL1	MAMLD1
	KIF21A	ANKRD12	TBRG1	ADARB1	FAM46B	KIAA0040	AP3S2	MLXIP
	CAPZA1	ZBTB40	MKNK2	PITPNC1	CRY2	GFPT1	C15orf38-AP3S2	PCYOX1
	WDR26	CDCA8	CAPN15	ERRFI1	CBX8	AMFR	CAPN1	RPRD1A
	NUFIP2	ERCC1	BTG2	ESF1	CD3EAP	MTRNR2L5	CBX6	SLC24A4
	SS18	RPL22	GPR180	ARID5B	TMEM109	SLC7A5	CLDN7	SLC2A5
	ZNF490	MYL12A	TRIM31	MAP3K3	SPATA13	NUP50	CLDND1	TMBIM6
	SCD5	TTLL12	ERAP2	CLIP1	LYRM2	FSTL3	FDFT1	ZDHHC23
	HEATR5B	ZER1	USP14	TMEM236	EPB41	FAM3D	FOXK1	ZNF423
	SERTAD4	UCK2	ZBTB22	ZNF207	CXCL6	DRAXIN	GDF15	ZNF431
	MAPK8	TTC39C	ACER2	SNTB2	PPP1R15A	TADA3	GUK1	BOD1
	SLC39A10	TNPO2	METRNL	UBE2V1	ZNF518B	FPGS	KLF9	C11orf74
	UBE2C	TMED10	SETD5	TMEM189-UBE2V1	PSMG1	C17orf51	PALD1
	ZBTB21	SUZ12	PSAT1	TMEM189	NUDT21	EBPL	POM121
	NFYA	STC2	FANCA	THRA	GAPVD1	XPOT	PXDC1
	AIFM2	SLC23A1	GJB7	CADM1	CTDSPL2	CASP10	SHANK3
	EPRS	SKI	LRPAP1	Chrdl1	AHCY	IPPK	TMED7-TICAM2
	TUBA1B	RACGAP1	MAP10	Mobp	SLC30A3	NRF1	TPI1
	FAU	PABPN1	MARC1	Ptbp1	SLC16A10	NEBL	VASH1
	USP46	MAX	AP5Z1	Tgfbr3	KCNMB1	MYO6	C3orf52
	CD38	LRRC20	ORMDL3	CHRDL1	BRMS1L	STUM	CCDC198
	DAZAP2	FURIN	SLC1A4	PLCL1	HMGN1	IBTK	ESR2
	ATXN1	DDI2	TRPC4	IL17REL	EMC8	NCKAP1L	FAM213B
	ATP6AP2	CNN2	TMEM133	UBTF	MICB	NFASC	GCNT3
hsa-miR-1205	RUFY2	SETD1B	MRS2	NOC2L
	RAB5B	PISD	FGFR1OP	NUP98
	RNF38	FAM98A	FAM46B	PEA15
	LSM14A	ATG12	UBE2H	PKM
	CAPN1	ZNF442	GCC1	POLR2E
	HSD17B12	USP46	GSTO2	PPP2R5D
	HIST1H2BK	SMARCE1	STX16	SBNO1
	ENPP5	SESN2	MTA1	SELENON
	ZDHHC6	CRKL	TMED10	SLC7A1
	MTRF1L	SNRPD3	PHLDA2	ATOH8
	SLC35F6	ENPP2	NUP35	COTL1
	KCTD2	SLC35F5	GDPD5	HES6
	F2RL3	RAB1A	FBXL20	PRDM11
	ZNF317	EIF1AX	SLC4A2
	VGLL4	RNF11	ABHD12
	UBE2G1	PICALM	CFAP73
	TRMT6	HOXA13	DCC
	TOR2A	PTBP1	CCNQ
	TNFAIP1	POLDIP2	NLRC5
	THBS1	DLC1	ANKS1A
	HACD2	SF1	BCAP31
	PRDX5	Timp3	C16orf58
	PDPR	Hmox1	FBXL18
	NR6A1	GGA2	FEM1A
	COPS7B	SMOC2	GPATCH3
	ARL5C	JPH2	HDAC5
	CLASP1	CSNK2A1	KCNH2
	SKI	LY6G6E	LMNB2
	MSI1	KDELR1	LRRC58
	LAMA5	SLC6A4	NFIC
hsa-miR-421	RBMXL1	CREBRF	CEP57	ISY1	SRPRA	NBPF8	ASB16	NFE2L1
	CBX7	FAM122A	RPL26L1	ZMYND8	FAM168B	CASTOR2	PRICKLE2	KCNN3
	ATM	DNAJC27	PCNX4	SRP9	CMAS	CEBPD	GOSR1	KCNMB4
	SMAD4	ZFP36L2	SENP7	GAREM2	TRIM27	MTAP	GJD3	SOD2
	NSL1	RND3	DOK4	INPP4A	NR3C1	TMEM37	GAS1	ZFP64
	SRSF7	ATG2B	OTUD1	MLXIP	ATP6V0C	VPS37C	CSNK1A1	NEGR1
	GID8	TTC37	CDC42SE2	DUS3L	ZXDA	TM9SF1	TUBB2A	COL4A1
	EIF3K	RBBP7	MRPL38	FKBP8	SFXN1	VMP1	REST	BAHD1
	MAPK8	AFF4	ATXN2L	DNAJC16	DFFB	ARHGAP22	YTHDF1	CCDC39
	LIMS1	NIPBL	TSR1	COPRS	RASAL1	FAM155B	UQCRFS1	BACE1
	ZNF30	LMCD1	GFOD2	TUBA1B	KIAA0100	CBWD1	TXNRD1	MAZ
	GID4	RANBP2	RAB2B	CASP2	CD276	CBWD5	RACGAP1	TLK1
	DDX39A	USO1	PPP1R13B	RPS18	RHOBTB2	PPTC7	QSER1	RHOH
	ZNF678	AP3B1	NPM1	HSP90AA1	SMCHD1	PDPK1	Vmp1	CDH1
	MIS18BP1	PAXBP1	PARP10	COPA	FAM32A	TSC22D3	MYBPC1	SIRT3
	NXPE3	PPARGC1A	PQLC2	RAB11FIP1	RAB26	GALK2	VSIG10	E2F6
	RNF138	FAT2	SLC25A6	RHOB	TMEM109	UBE2D3	TNRC6C	SCD
	LIN7C	MTHFD2	PRR7	PSME1	NCAPG	GJB7	RREB1	AP1G1
	RGMB	GCSH	AGO1	MCFD2	PRCC	SLC6A13	FAM89A	C5orf46
	SREK1IP1	LARS2	FBXO11	CNOT1	PPP2CB	PARP11	TCF7L2	DGKH
	TAF9	RPL18A	AHNAK	ZC3H7B	PHLPP2	HOXA9	INTU	GMNN
	NR6A1	EIF4A1	GRK6	AMZ2	RALGAPB	BTRC	FBXL16	LSM4
	CD46	DUSP3	SLIT1	HTT	HADHA	TRIM4	CSE1L	RIMS4
	NDC1	PHKA1	SLC9A6	LBR	P3H4	SLC28A1	GRK3	SPINT2
	CREBZF	HIST2H4B	FAM172A	NCDN	CASP3	SYT4	CD226	ZNF219
	POLR2D	DDX20	SPECC1L	RASL10B	PNPO	JARID2	TET1	RGS2
	CEBPB	CAP1	SEPT2	RIF1	XIAP	IGF1	ZNF208
	FAM160B1	ACOT9	CTC1	EEF1A1	ZNF652	RGR	POLG
	VAPA	EIF4G2	CDC37	ITPK1	ID4	TPRG1L	TREM1
	DDX3X	MSL3	ZNF280C	RPS10	FOXO4	RSRC1	NPTX1
hsa-miR-621	KLHL15	FAM49A
	DAD1	PATZ1
	GRPEL2
	MIER3
	FOXO3
	PAWR
	ALDH1A2
	MAF
	MARVELD2
	OIP5
	PABPC1L2B
	PABPC1L2A
	ACTR3B
	PPP1R15B
	ACTG1
	CNOT6
	SLC25A46
	RORA
	ZNF704
	KIAA1456
	TOGARAM2
	CEP72
	MYOZ2
	CTPS1
	COX6B1
	STRN
	AMMECR1L
	C22orf39
	CCDC127
	CDK6
hsa-miR-648	HMGA2	DYRK3	ZNF138
	CALM1	COPA	ZNF264
	ZNF460	SFMBT2	Tmem106b
	TNPO1	WDR45B	Synpo
	HBP1	TMED7	KATNAL1
	MGRN1	AKR1B10	HIF1AN
	ARL5B	S100A11	DHODH
	MBD6	PHLDA3	NCK2
	MPRIP	TLE3	RAB3C
	EVI5L	MSANTD4	EDN1
	C1orf226	VAPB	PHLDA1
	ACP1	YWHAH	SEC16A
	CEP350	MON1B	ZNF584
	ZFP91	RIC8A	EIF5AL1
	MGMT	EXOC8	SCYL3
	TRDMT1	MALT1	XRRA1
	PRSS12	PSAPL1
	PAK2	GJA1
	ARL15	TRIAP1
	CHRNA6	TOR1AIP2
	RPS19	RAB1A
	QDPR	CASZ1
	ZDHHC6	TBX4
	UCK2	GNL3L
	THBS1	LUZP1
	SMG1	ZNF529
	SGK1	CCNG1
	RAD21	TNIP2
	IMPDH1P11	TBC1D13
	FBLIM1	HMGB1
hsa-miR-1197	TMEM19	DENND4B	TNRC6B
	ZNF391	CAPRIN1	ANKFY1
	METTL12	STAT5A	EDC3
	NOS1AP	KALRN	PSMA7
	GPIHBP1	SOCS7	SCYL3
	WIZ	SLC44A1	SNAPC1
	RAI1	ATAT1	ZSCAN2
	ICOSLG	GALNT10	AMFR
	APEX1	OTUD7A	CEACAM19
	AHR	BMPR1A	ECE1
	CITED4	MYLK4	ETV3
	UBTF	ZNF277	SLBP
	FEM1C	ATP9A	SLIT1
	AP3M2	EPHX2	TEX22
	AJAP1	UGT8
	SRRT	NUP210
	BTG2	LNPEP
	TMEM229B	ATP1B3
	SETD5	PIP5K1C
	CDCA3	BZW1
	NFIB	CDKN1A
	KLHL15	EPHA2
	NONO	LASP1
	GTF2A1	LMNB2
	POP7	NACC1
	HNRNPR	PLEKHM1
	TRIM2	PPL
	LONRF1	PSAP
	STRADB	RHBDD1
	PTMA	TNFAIP1
hsa-miR-567	HOXC8	CSMD1	HNRNPA0	TMTC3	HHIP	ZNF860	KCNQ3
	SAP18	UBXN2B	HMGXB4	OSBPL9	GXYLT2	C12orf60	LRP2BP
	CCNK	PGBD4	DUSP7	LRIG3	GPBP1L1	CDH6	MYO5A
	ZSWIM6	ELF2	CSRNP3	LHFPL2	ENTPD5	LPP	NEUROD2
	OXR1	LHFPL5	CFL2	FBXO28	DYRK2	NECAB1	RBBP9
	FLVCR1	BVES	SLC35E3	CERCAM	DGKH	CLN8	RSPO1
	ZBTB34	CYGB	WDR72	ABI2	CHORDC1	MX2	SDK2
	CTCF	CLEC2D	RIC8B	TMEM106C	CBX1	SORCS2	SMIM21
	SATB1	DOCK7	CALHM5	CYP4V2	BRWD3	KCNK6	TACR3
	PURB	ZNF268	GLRX2	AR	APP	IGF1	TBCK
	ZFX	SENP1	KCNK12	ACTA1	AMER1	GATM	TLR5
	PEX26	SEC23IP	ZNF333	ATP7A	TRIM13	CAPRIN1	UBE2E3
	PEG10	PPP4R2	RBM22	OPCML	ZNF35	NFIC	ZDHHC15
	KIF1B	PLEKHA3	VEGFA	ADH1B	IGFBP5	ADAMTS9	ZNF551
	C1D	KCNJ3	TMEM106B	MMADHC	DEK	SLC25A12
	NT5C1B	CCDC38	PAPSS2	TMEM133	SIGMAR1	HACE1
	NT5C1B-RDH14	ENTHD1	NELL2	ITGA1	DMD	UGT2B4
	NDUFC2-KCTD14	TECRL	MYADM	EPHA1	DCAF8	RAB31
	ZNF449	TSPAN2	GRIN2B	IGLON5	CTSE	KPNA4
	STX6	BRCC3	ETV6	MED10	RGS5	CDKN1A
	PRKAA1	SPSB1	EPHA5	UBR3	SHH	CHP1
	PATL1	EFCAB11	CREB1	TRAF5	SYT9	DIAPH1
	NUFIP2	TMEM132B	AMMECR1	RRAGC	JKAMP	SESN1
	KPNA2	USP25	RPL28	PROX1	KCNJ6	SHANK3
	ELL2	KANSL1L	SSPN	PLCB1	ZFHX2	SMTN
	AZIN1	STARD8	TAOK1	PCDH11Y	Tmem106b	STMP1
	AKT3	ATP5S	EDA2R	MBNL2	Cdh6	ACVR2B
	THBS1	SV2B	MKLN1	MB21D2	Thbs1	ARHGEF9
	ASB11	PURA	PLP1	MAPRE2	BNC2	EOGT
	C11orf74	NRF1	GABRG1	KATNAL1	SPATA6	GLP1R
hsa-miR-1263	CCND2
	DICER1
	PRRC2C
	CREBZF
	RABGEF1
	THRA
	DENND4C
	EMP1
	YRDC
	MRS2
	WDR26
	ANKS1A
	CD46
	PPIC
	SOD2
	STXBP5L
	NR3C1
	GIPC1
	REEP4
hsa-miR-1289	ATP4A	SCN2B	CCR6	APOBEC4	TAOK1
	EIF5A	SMPD1	FSD2	DNAJB4	TECPR1
	SGPL1	TIMM8A	IL10RB	HEATR5A	ZBTB37
	VNN1	SLC30A3	CAMKK2	ZNF347	ZC2HC1C
	PACS2	SEMA7A	ATP5G1	ANKS4B	ZNF426
	NUP133	C2orf15	SLC26A2	APOA1	ZNF431
	UCK2	SKAP2	TNFRSF10B	ATP5F1	ZNF708
	KLF13	SH2B3	SSR2	CALCOCO2
	ABHD14B	OCIAD2	RCC2	CERS4
	BICD2	ELP2	ACOT9	CLDN19
	MEX3A	ZNF573	GJD2	DNAL1
	RGS6	ANKRD9	RFK	ELMOD1
	RMND5A	FAM71F2	ORAI2	EPB42
	YWHAH	ZNF429	RRP7A	FFAR2
	KY	IKZF3	GDF7	GMEB1
	ZNF485	KIAA0930	FNBP4	HIST1H2AH
	CENPA	SLC25A16	DMRT2	HOOK3
	TIMM29	GTF2H5	AMH	HSPA4L
	EIF5AL1	UBE2V2	BCL2L1	LPIN1
	ZBTB8A	LRRC2	BSG	MAGT1
	HIST2H2BE	C1orf50	CAPNS1	MCOLN2
	MYO1C	RUNDC1	CIAO1	NFKBIB
	Ang	THAP1	FBRS	OSTF1
	ANG	SLC35F6	JUNB	PIGM
	JPH2	ZNF440	MPP2	PNPLA3
	LRAT	DCTN6	NR6A1	POLR3A
	SLC25A33	MYCBP	PRSS8	PRELID2
	BPNT1	PRR23A	SETD1B	RAB9A
	FAM126B	ADAMTS4	SETD2	RNF125
	NUBPL	FGD6	TMEM86B	SWSAP1
